# Supplementary material for: Human MicroRNA Targets
Source: PLoS Biol. 2004 Oct 5;2(11):e363. doi: 10.1371/journal.pbio.0020363 (PMC521178; doi:10.1371/journal.pbio.0020363)
Supplement: Table S5 — (9.8 MB XLS). [file pbio.0020363.st005.xls]

## Sheet: FISH_ALL_BYMIRNA.txt
					Predicted fish targets by miRNA (Updates will be made available at http://www.microrna.org).
MicroRNA	Zebrafish Transcript	Zebrafish Gene	Fugu Orthologue		Annotation [Family] [Domains]	Total Conserved Hits	Total Energy (kcal/mol)	Total Score	Fugu Transcript (miRNA)		Other miRNAs	GO Terms	Alignments
fru-mir-205-1a	ENSDART00000015634_P	ENSDARG00000007722	SINFRUG00000153875		ENSDARG00000007722 4001 (4001 nt) [AMBIGUOUS;] [NUDIX hydrolase:NUDIX hydrolase;]	6	118.62	606	SINFRUG00000153875 (fru-miR-205-1a) SINFRUG000001538 (fru-miR-205-1a)		fru-mir-205-1a dre-mir-205 dre-mir-24-1 fru-mir-24-3		3' GUCUGAGGCCACCUUACUUCCU 5' fru-mir-205-1a __ .|||||.:|.|..||||||||| __ 5' GAGACUAUGCU--AAUGAAGGA 3' ENSDART00000015634_P E:-19.77 S:101.000000 Loc:809 Cons: 70.00%(fru)	3' GUCUGAGGCCACCUUACUUCCU 5' fru-mir-205-1a __ .|||||.:|.|..||||||||| __ 5' GAGACUAUGCU--AAUGAAGGA 3' ENSDART00000015634_P E:-19.77 S:101.000000 Loc:952 Cons: 70.00%(fru)	3' GUCUGAGGCCACCUUACUUCCU 5' fru-mir-205-1a __ .|||||.:|.|..||||||||| __ 5' GAGACUAUGCU--AAUGAAGGA 3' ENSDART00000015634_P E:-19.77 S:101.000000 Loc:1023 Cons: 70.00%(fru)	3' GUCUGAGGCCACCUUACUUCCU 5' fru-mir-205-1a __ .|||||.:|.|..||||||||| __ 5' GAGACUAUGCU--AAUGAAGGA 3' ENSDART00000015634_P E:-19.77 S:101.000000 Loc:1095 Cons: 70.00%(fru)	3' GUCUGAGGCCACCUUACUUCCU 5' fru-mir-205-1a __ .|||||.:|.|..||||||||| __ 5' GAGACUAUGCU--AAUGAAGGA 3' ENSDART00000015634_P E:-19.77 S:101.000000 Loc:1169 Cons: 70.00%(fru)	3' GUCUGAGGCCACCUUACUUCCU 5' fru-mir-205-1a __ .|||||.:|.|..||||||||| __ 5' GAGACUAUGCU--AAUGAAGGA 3' ENSDART00000015634_P E:-19.77 S:101.000000 Loc:1240 Cons: 70.00%(fru)
dre-mir-205	ENSDART00000015634_P	ENSDARG00000007722	SINFRUG00000153875		ENSDARG00000007722 4001 (4001 nt) [AMBIGUOUS;] [NUDIX hydrolase:NUDIX hydrolase;]	6	118.62	606	SINFRUG00000153875 (dre-miR-205)		fru-mir-205-1a dre-mir-205 dre-mir-24-1 fru-mir-24-3		3' GUCUGAGGCCACCUUACUUCCU 5' dre-mir-205 __ .|||||.:|.|..||||||||| __ 5' GAGACUAUGCU--AAUGAAGGA 3' ENSDART00000015634_P E:-19.77 S:101.000000 Loc:809 Cons: 70.00%(fru)	3' GUCUGAGGCCACCUUACUUCCU 5' dre-mir-205 __ .|||||.:|.|..||||||||| __ 5' GAGACUAUGCU--AAUGAAGGA 3' ENSDART00000015634_P E:-19.77 S:101.000000 Loc:952 Cons: 70.00%(fru)	3' GUCUGAGGCCACCUUACUUCCU 5' dre-mir-205 __ .|||||.:|.|..||||||||| __ 5' GAGACUAUGCU--AAUGAAGGA 3' ENSDART00000015634_P E:-19.77 S:101.000000 Loc:1023 Cons: 70.00%(fru)	3' GUCUGAGGCCACCUUACUUCCU 5' dre-mir-205 __ .|||||.:|.|..||||||||| __ 5' GAGACUAUGCU--AAUGAAGGA 3' ENSDART00000015634_P E:-19.77 S:101.000000 Loc:1095 Cons: 70.00%(fru)	3' GUCUGAGGCCACCUUACUUCCU 5' dre-mir-205 __ .|||||.:|.|..||||||||| __ 5' GAGACUAUGCU--AAUGAAGGA 3' ENSDART00000015634_P E:-19.77 S:101.000000 Loc:1169 Cons: 70.00%(fru)	3' GUCUGAGGCCACCUUACUUCCU 5' dre-mir-205 __ .|||||.:|.|..||||||||| __ 5' GAGACUAUGCU--AAUGAAGGA 3' ENSDART00000015634_P E:-19.77 S:101.000000 Loc:1240 Cons: 70.00%(fru)
dre-mir-204	ENSDART00000019700_P	ENSDARG00000015023	SINFRUG00000124018		ENSDARG00000015023 4001 (4001 nt) [CGI 79;] [RNA-binding region RNP-1 (RNA recognition motif):RNA-binding region RNP-1 (RNA recognition motif);]	5	96.2	527	SINFRUG00000124018 (dre-miR-204) SINF (dre-miR-204)		fru-mir-204-1b fru-mir-204-1a dre-mir-204		3' GUCCGUAUCCUACUGUUUCCCUU 5' dre-mir-204 __ .||.|:.||||.||||:||.||. __ 5' GAGACGGAGGAAGACAGAGAGAU 3' ENSDART00000019700_P E:-19.57 S:106.000000 Loc:4 Cons: 73.91%(fru)	3' GUCCGUAUCCUACUGUUUCCCUU 5' dre-mir-204 __ .||.|:.||||.||||:||.||. __ 5' GAGACGGAGGAAGACAGAGAGAU 3' ENSDART00000019700_P E:-19.57 S:106.000000 Loc:52 Cons: 73.91%(fru)	3' GUCCGUAUCCUACUGUUUCCCUU 5' dre-mir-204 __ .||.|:.||||.||||:||.||. __ 5' GAGACGGAGGAAGACAGAGAGAU 3' ENSDART00000019700_P E:-19.57 S:106.000000 Loc:100 Cons: 73.91%(fru)	3' GUCCGUAUCCUACUGUUUCCCUU 5' dre-mir-204 __ .||.|:.||||.||||:||.||. __ 5' GAGACGGAGGAAGACAGAGAGAU 3' ENSDART00000019700_P E:-19.57 S:106.000000 Loc:196 Cons: 73.91%(fru)	3' GUCCGUAUCCUACUGUUUCCCUU 5' dre-mir-204 __ .||.::.||||.||||:||.||. __ 5' GAGAUGGAGGAAGACAGAGAGAU 3' ENSDART00000019700_P E:-17.92 S:103.000000 Loc:148 Cons: 73.91%(fru)
fru-mir-204-1b	ENSDART00000019700_P	ENSDARG00000015023	SINFRUG00000124018		ENSDARG00000015023 4001 (4001 nt) [CGI 79;] [RNA-binding region RNP-1 (RNA recognition motif):RNA-binding region RNP-1 (RNA recognition motif);]	4	78.28	424	SINFRUG00000124018 (fru-miR-204-1b)		fru-mir-204-1b fru-mir-204-1a dre-mir-204		3' GUCCGUAUCCUACUGUUUCCCUU 5' fru-mir-204-1b __ .||.|:.||||.||||:||.||. __ 5' GAGACGGAGGAAGACAGAGAGAU 3' ENSDART00000019700_P E:-19.57 S:106.000000 Loc:4 Cons: 73.91%(fru)	3' GUCCGUAUCCUACUGUUUCCCUU 5' fru-mir-204-1b __ .||.|:.||||.||||:||.||. __ 5' GAGACGGAGGAAGACAGAGAGAU 3' ENSDART00000019700_P E:-19.57 S:106.000000 Loc:52 Cons: 73.91%(fru)	3' GUCCGUAUCCUACUGUUUCCCUU 5' fru-mir-204-1b __ .||.|:.||||.||||:||.||. __ 5' GAGACGGAGGAAGACAGAGAGAU 3' ENSDART00000019700_P E:-19.57 S:106.000000 Loc:100 Cons: 73.91%(fru)	3' GUCCGUAUCCUACUGUUUCCCUU 5' fru-mir-204-1b __ .||.|:.||||.||||:||.||. __ 5' GAGACGGAGGAAGACAGAGAGAU 3' ENSDART00000019700_P E:-19.57 S:106.000000 Loc:196 Cons: 73.91%(fru)
fru-mir-24-3	ENSDART00000015634_P	ENSDARG00000007722	SINFRUG00000153875		ENSDARG00000007722 4001 (4001 nt) [AMBIGUOUS;] [NUDIX hydrolase:NUDIX hydrolase;]	4	88.04	412	SINFRUG00000153875 (fru-miR-24-3)		fru-mir-205-1a dre-mir-205 dre-mir-24-1 fru-mir-24-3		3' AACAAGGACGACCUGACUCGGU 5' fru-mir-24-3 __ ||.||:|||.|||::.|||||. __ 5' UUUUUUCUG-UGGGUGGAGCCU 3' ENSDART00000015634_P E:-22.01 S:103.000000 Loc:909 Cons: 71.43%(fru)	3' AACAAGGACGACCUGACUCGGU 5' fru-mir-24-3 __ ||.||:|||.|||::.|||||. __ 5' UUUUUUCUG-UGGGUGGAGCCU 3' ENSDART00000015634_P E:-22.01 S:103.000000 Loc:1126 Cons: 71.43%(fru)	3' AACAAGGACGACCUGACUCGGU 5' fru-mir-24-3 __ ||.||:|||.|||::.|||||. __ 5' UUUUUUCUG-UGGGUGGAGCCU 3' ENSDART00000015634_P E:-22.01 S:103.000000 Loc:1271 Cons: 71.43%(fru)	3' AACAAGGACGACCUGACUCGGU 5' fru-mir-24-3 __ ||.||:|||.|||::.|||||. __ 5' UUUUUUCUG-UGGGUGGAGCCU 3' ENSDART00000015634_P E:-22.01 S:103.000000 Loc:1414 Cons: 71.43%(fru)
fru-mir-204-1a	ENSDART00000019700_P	ENSDARG00000015023	SINFRUG00000124018		ENSDARG00000015023 4001 (4001 nt) [CGI 79;] [RNA-binding region RNP-1 (RNA recognition motif):RNA-binding region RNP-1 (RNA recognition motif);]	4	69.4	400	SINFRUG00000124018 (fru-miR-204-1a)		fru-mir-204-1b fru-mir-204-1a dre-mir-204		3' GUCCGUAUCCUAUUGUUUCCCUU 5' fru-mir-204-1a __ .||.|:.||||.:|||:||.||. __ 5' GAGACGGAGGAAGACAGAGAGAU 3' ENSDART00000019700_P E:-17.35 S:100.000000 Loc:4 Cons: 73.91%(fru)	3' GUCCGUAUCCUAUUGUUUCCCUU 5' fru-mir-204-1a __ .||.|:.||||.:|||:||.||. __ 5' GAGACGGAGGAAGACAGAGAGAU 3' ENSDART00000019700_P E:-17.35 S:100.000000 Loc:52 Cons: 73.91%(fru)	3' GUCCGUAUCCUAUUGUUUCCCUU 5' fru-mir-204-1a __ .||.|:.||||.:|||:||.||. __ 5' GAGACGGAGGAAGACAGAGAGAU 3' ENSDART00000019700_P E:-17.35 S:100.000000 Loc:100 Cons: 73.91%(fru)	3' GUCCGUAUCCUAUUGUUUCCCUU 5' fru-mir-204-1a __ .||.|:.||||.:|||:||.||. __ 5' GAGACGGAGGAAGACAGAGAGAU 3' ENSDART00000019700_P E:-17.35 S:100.000000 Loc:196 Cons: 73.91%(fru)
dre-mir-18-2	ENSDART00000011772_P	ENSDARG00000007325	SINFRUG00000151668		RETINOID X RECEPTOR, GAMMA; RETINOID X RECEPTOR. [Source:RefSeq;Acc:NM_131153] ENSDARG00000007325 (1) (75128 75128 76993 76994 126520) 4001 (4001 nt) [RECEPTOR; RECEPTOR; RECEPTOR;] [Retinoid X receptor:Retinoid X receptor; Steroid hormone receptor:Steroid hormone receptor; Zn-finger, C4-type steroid receptor:Zn-finger, C4-type steroid receptor; Vitamin D receptor:Vitamin D receptor; Transcriptio…	3	79.25	393	SINFRUG00000151668 (dre-miR-18-2)		fru-mir-18-1b dre-mir-18-2 dre-mir-18-2b fru-mir-18-1a dre-mir-18-1	GO:0003707->steroid hormone receptor activity GO:0006350->transcription GO:0003700->transcription factor activity GO:0004879->ligand-dependent nuclear receptor activity GO:0005634->nucleus GO:0005634->nucleus GO:0003677->DNA binding GO:0003677->DNA binding GO:0004872->receptor activity GO:0006355->regulation of transcription, DNA-dependent GO:0006355->regulation of transcription, DNA-dependent	3' AUAGACGUGAUUUACGUGGAAU 5' dre-mir-18-2 __ .|.||||.||:||||||:|||| __ 5' CAGCUGCUCUGAAUGCAUCUUA 3' ENSDART00000011772_P E:-28.15 S:135.000000 Loc:1073 Cons: 77.27%(fru)	3' AUAGACGUGAUUUACGUGGAAU 5' dre-mir-18-2 __ .|.||||.||:||||||::||| __ 5' CAGCUGCUCUGAAUGCAUUUUA 3' ENSDART00000011772_P E:-25.549999 S:129.000000 Loc:632 Cons: 72.73%(fru)	3' AUAGACGUGAUUUACGUGGAAU 5' dre-mir-18-2 __ .|.||||.||:||||||::||| __ 5' CAGCUGCUCUGAAUGCAUUUUA 3' ENSDART00000011772_P E:-25.549999 S:129.000000 Loc:852 Cons: 72.73%(fru)
dre-mir-18-2b	ENSDART00000011772_P	ENSDARG00000007325	SINFRUG00000151668		RETINOID X RECEPTOR, GAMMA; RETINOID X RECEPTOR. [Source:RefSeq;Acc:NM_131153] ENSDARG00000007325 (1) (75128 75128 76993 76994 126520) 4001 (4001 nt) [RECEPTOR; RECEPTOR; RECEPTOR;] [Retinoid X receptor:Retinoid X receptor; Steroid hormone receptor:Steroid hormone receptor; Zn-finger, C4-type steroid receptor:Zn-finger, C4-type steroid receptor; Vitamin D receptor:Vitamin D receptor; Transcriptio…	3	79.25	393	SINFRUG00000151668 (dre-miR-18-2b)		fru-mir-18-1b dre-mir-18-2 dre-mir-18-2b fru-mir-18-1a dre-mir-18-1	GO:0003707->steroid hormone receptor activity GO:0006350->transcription GO:0003700->transcription factor activity GO:0004879->ligand-dependent nuclear receptor activity GO:0005634->nucleus GO:0005634->nucleus GO:0003677->DNA binding GO:0003677->DNA binding GO:0004872->receptor activity GO:0006355->regulation of transcription, DNA-dependent GO:0006355->regulation of transcription, DNA-dependent	3' AUAGACGUGAUUUACGUGGAAU 5' dre-mir-18-2b __ .|.||||.||:||||||:|||| __ 5' CAGCUGCUCUGAAUGCAUCUUA 3' ENSDART00000011772_P E:-28.15 S:135.000000 Loc:1073 Cons: 77.27%(fru)	3' AUAGACGUGAUUUACGUGGAAU 5' dre-mir-18-2b __ .|.||||.||:||||||::||| __ 5' CAGCUGCUCUGAAUGCAUUUUA 3' ENSDART00000011772_P E:-25.549999 S:129.000000 Loc:632 Cons: 72.73%(fru)	3' AUAGACGUGAUUUACGUGGAAU 5' dre-mir-18-2b __ .|.||||.||:||||||::||| __ 5' CAGCUGCUCUGAAUGCAUUUUA 3' ENSDART00000011772_P E:-25.549999 S:129.000000 Loc:852 Cons: 72.73%(fru)
dre-mir-98-3a	ENSDART00000027199_P	ENSDARG00000006093	SINFRUG00000145446		ENSDARG00000006093 4001 (4001 nt) [KINASE;] [Protein kinase:Protein kinase;]	4	71.76	388	SINFRUG00000145446 (fru-miR-98-3a)		dre-mir-98-3a dre-mir-98-3b		3' UUGGUGUGUUGGAUGAUGGAGU 5' dre-mir-98-3a __ ||:|||||...||||||.:.|| __ 5' AAUCACAC---CUACUAGUACA 3' ENSDART00000027199_P E:-17.940001 S:97.000000 Loc:1741 Cons: 73.68%(fru)	3' UUGGUGUGUUGGAUGAUGGAGU 5' dre-mir-98-3a __ ||:|||||...||||||.:.|| __ 5' AAUCACAC---CUACUAGUACA 3' ENSDART00000027199_P E:-17.940001 S:97.000000 Loc:1945 Cons: 73.68%(fru)	3' UUGGUGUGUUGGAUGAUGGAGU 5' dre-mir-98-3a __ ||:|||||...||||||.:.|| __ 5' AAUCACAC---CUACUAGUACA 3' ENSDART00000027199_P E:-17.940001 S:97.000000 Loc:2047 Cons: 73.68%(fru)	3' UUGGUGUGUUGGAUGAUGGAGU 5' dre-mir-98-3a __ ||:|||||...||||||.:.|| __ 5' AAUCACAC---CUACUAGUACA 3' ENSDART00000027199_P E:-17.940001 S:97.000000 Loc:2200 Cons: 73.68%(fru)
dre-mir-98-3b	ENSDART00000027199_P	ENSDARG00000006093	SINFRUG00000145446		ENSDARG00000006093 4001 (4001 nt) [KINASE;] [Protein kinase:Protein kinase;]	4	71.76	388	SINFRUG00000145446 (fru-miR-98-3b)		dre-mir-98-3a dre-mir-98-3b		3' UUGGUGUGUUGGAUGAUGGAGU 5' dre-mir-98-3b __ ||:|||||...||||||.:.|| __ 5' AAUCACAC---CUACUAGUACA 3' ENSDART00000027199_P E:-17.940001 S:97.000000 Loc:1741 Cons: 73.68%(fru)	3' UUGGUGUGUUGGAUGAUGGAGU 5' dre-mir-98-3b __ ||:|||||...||||||.:.|| __ 5' AAUCACAC---CUACUAGUACA 3' ENSDART00000027199_P E:-17.940001 S:97.000000 Loc:1945 Cons: 73.68%(fru)	3' UUGGUGUGUUGGAUGAUGGAGU 5' dre-mir-98-3b __ ||:|||||...||||||.:.|| __ 5' AAUCACAC---CUACUAGUACA 3' ENSDART00000027199_P E:-17.940001 S:97.000000 Loc:2047 Cons: 73.68%(fru)	3' UUGGUGUGUUGGAUGAUGGAGU 5' dre-mir-98-3b __ ||:|||||...||||||.:.|| __ 5' AAUCACAC---CUACUAGUACA 3' ENSDART00000027199_P E:-17.940001 S:97.000000 Loc:2200 Cons: 73.68%(fru)
dre-mir-196-1c	ENSDART00000002034_P	ENSDARG00000001739	SINFRUG00000150242		ENSDARG00000001739 4001 (4001 nt) [HECT DOMAIN CONTAINING 1 FRAGMENT; HECT DOMAIN CONTAINING 1 FRAGMENT; HECT DOMAIN CONTAINING 1 FRAGMENT;] [HECT domain (Ubiquitin-protein ligase):HECT domain (Ubiquitin-protein ligase); HECT domain (Ubiquitin-protein ligase):HECT domain (Ubiquitin-protein ligase); Ankyrin:Ankyrin; HECT domain (Ubiquitin-protein ligase):HECT domain (Ubiquitin-protein ligase);]	4	75.1	386	SINFRUG00000150242 (dre-miR-196-1c)		dre-mir-181-1d dre-mir-181-1a dre-mir-181-1b dre-mir-181-1c dre-mir-196-1c dre-mir-196-1b		3' GGUUGUUGUACUUUGAUGGAU 5' dre-mir-196-1c __ .||::|||||.|||.|||||: __ 5' ACAGUAACAUCAAA-UACCUG 3' ENSDART00000002034_P E:-18.67 S:101.000000 Loc:1766 Cons: 80.00%(fru)	3' GGUUGUUGUACUUUGAUGGAU 5' dre-mir-196-1c __ .||::|||||.|:|.|||||: __ 5' ACAGUAACAUCAGA-UACCUG 3' ENSDART00000002034_P E:-18.809999 S:95.000000 Loc:1397 Cons: 75.00%(fru)	3' GGUUGUUGUACUUUGAUGGAU 5' dre-mir-196-1c __ .||::|||||.|:|.|||||: __ 5' ACAGUAACAUCAGA-UACCUG 3' ENSDART00000002034_P E:-18.809999 S:95.000000 Loc:1461 Cons: 75.00%(fru)	3' GGUUGUUGUACUUUGAUGGAU 5' dre-mir-196-1c __ .||::|||||.|:|.|||||: __ 5' ACAGUAACAUCAGA-UACCUG 3' ENSDART00000002034_P E:-18.809999 S:95.000000 Loc:1525 Cons: 75.00%(fru)
dre-mir-196-1b	ENSDART00000002034_P	ENSDARG00000001739	SINFRUG00000150242		ENSDARG00000001739 4001 (4001 nt) [HECT DOMAIN CONTAINING 1 FRAGMENT; HECT DOMAIN CONTAINING 1 FRAGMENT; HECT DOMAIN CONTAINING 1 FRAGMENT;] [HECT domain (Ubiquitin-protein ligase):HECT domain (Ubiquitin-protein ligase); HECT domain (Ubiquitin-protein ligase):HECT domain (Ubiquitin-protein ligase); Ankyrin:Ankyrin; HECT domain (Ubiquitin-protein ligase):HECT domain (Ubiquitin-protein ligase);]	4	75.1	386	SINFRUG00000150242 (fru-miR-196-1b)		dre-mir-181-1d dre-mir-181-1a dre-mir-181-1b dre-mir-181-1c dre-mir-196-1c dre-mir-196-1b		3' GGUUGUUGUACUUUGAUGGAU 5' dre-mir-196-1b __ .||::|||||.|||.|||||: __ 5' ACAGUAACAUCAAA-UACCUG 3' ENSDART00000002034_P E:-18.67 S:101.000000 Loc:1766 Cons: 80.00%(fru)	3' GGUUGUUGUACUUUGAUGGAU 5' dre-mir-196-1b __ .||::|||||.|:|.|||||: __ 5' ACAGUAACAUCAGA-UACCUG 3' ENSDART00000002034_P E:-18.809999 S:95.000000 Loc:1397 Cons: 75.00%(fru)	3' GGUUGUUGUACUUUGAUGGAU 5' dre-mir-196-1b __ .||::|||||.|:|.|||||: __ 5' ACAGUAACAUCAGA-UACCUG 3' ENSDART00000002034_P E:-18.809999 S:95.000000 Loc:1461 Cons: 75.00%(fru)	3' GGUUGUUGUACUUUGAUGGAU 5' dre-mir-196-1b __ .||::|||||.|:|.|||||: __ 5' ACAGUAACAUCAGA-UACCUG 3' ENSDART00000002034_P E:-18.809999 S:95.000000 Loc:1525 Cons: 75.00%(fru)
fru-mir-18-1b	ENSDART00000011772_P	ENSDARG00000007325	SINFRUG00000151668		RETINOID X RECEPTOR, GAMMA; RETINOID X RECEPTOR. [Source:RefSeq;Acc:NM_131153] ENSDARG00000007325 (1) (75128 75128 76993 76994 126520) 4001 (4001 nt) [RECEPTOR; RECEPTOR; RECEPTOR;] [Retinoid X receptor:Retinoid X receptor; Steroid hormone receptor:Steroid hormone receptor; Zn-finger, C4-type steroid receptor:Zn-finger, C4-type steroid receptor; Vitamin D receptor:Vitamin D receptor; Transcriptio…	3	69.56	345	SINFRUG00000151668 (fru-miR-18-1b)		fru-mir-18-1b dre-mir-18-2 dre-mir-18-2b fru-mir-18-1a dre-mir-18-1	GO:0003707->steroid hormone receptor activity GO:0006350->transcription GO:0003700->transcription factor activity GO:0004879->ligand-dependent nuclear receptor activity GO:0005634->nucleus GO:0005634->nucleus GO:0003677->DNA binding GO:0003677->DNA binding GO:0004872->receptor activity GO:0006355->regulation of transcription, DNA-dependent GO:0006355->regulation of transcription, DNA-dependent	3' AUAGACGUGAUCUACGUGGAAU 5' fru-mir-18-1b __ .|.||||.||:.|||||:|||| __ 5' CAGCUGCUCUGAAUGCAUCUUA 3' ENSDART00000011772_P E:-24.92 S:119.000000 Loc:1073 Cons: 77.27%(fru)	3' AUAGACGUGAUCUACGUGGAAU 5' fru-mir-18-1b __ .|.||||.||:.|||||::||| __ 5' CAGCUGCUCUGAAUGCAUUUUA 3' ENSDART00000011772_P E:-22.32 S:113.000000 Loc:632 Cons: 72.73%(fru)	3' AUAGACGUGAUCUACGUGGAAU 5' fru-mir-18-1b __ .|.||||.||:.|||||::||| __ 5' CAGCUGCUCUGAAUGCAUUUUA 3' ENSDART00000011772_P E:-22.32 S:113.000000 Loc:852 Cons: 72.73%(fru)
fru-mir-18-1a	ENSDART00000011772_P	ENSDARG00000007325	SINFRUG00000151668		RETINOID X RECEPTOR, GAMMA; RETINOID X RECEPTOR. [Source:RefSeq;Acc:NM_131153] ENSDARG00000007325 (1) (75128 75128 76993 76994 126520) 4001 (4001 nt) [RECEPTOR; RECEPTOR; RECEPTOR;] [Retinoid X receptor:Retinoid X receptor; Steroid hormone receptor:Steroid hormone receptor; Zn-finger, C4-type steroid receptor:Zn-finger, C4-type steroid receptor; Vitamin D receptor:Vitamin D receptor; Transcriptio…	3	69.56	345	SINFRUG00000151668 (fru-miR-18-1a)		fru-mir-18-1b dre-mir-18-2 dre-mir-18-2b fru-mir-18-1a dre-mir-18-1	GO:0003707->steroid hormone receptor activity GO:0006350->transcription GO:0003700->transcription factor activity GO:0004879->ligand-dependent nuclear receptor activity GO:0005634->nucleus GO:0005634->nucleus GO:0003677->DNA binding GO:0003677->DNA binding GO:0004872->receptor activity GO:0006355->regulation of transcription, DNA-dependent GO:0006355->regulation of transcription, DNA-dependent	3' AUAGACGUGAUCUACGUGGAAU 5' fru-mir-18-1a __ .|.||||.||:.|||||:|||| __ 5' CAGCUGCUCUGAAUGCAUCUUA 3' ENSDART00000011772_P E:-24.92 S:119.000000 Loc:1073 Cons: 77.27%(fru)	3' AUAGACGUGAUCUACGUGGAAU 5' fru-mir-18-1a __ .|.||||.||:.|||||::||| __ 5' CAGCUGCUCUGAAUGCAUUUUA 3' ENSDART00000011772_P E:-22.32 S:113.000000 Loc:632 Cons: 72.73%(fru)	3' AUAGACGUGAUCUACGUGGAAU 5' fru-mir-18-1a __ .|.||||.||:.|||||::||| __ 5' CAGCUGCUCUGAAUGCAUUUUA 3' ENSDART00000011772_P E:-22.32 S:113.000000 Loc:852 Cons: 72.73%(fru)
dre-mir-18-1	ENSDART00000011772_P	ENSDARG00000007325	SINFRUG00000151668		RETINOID X RECEPTOR, GAMMA; RETINOID X RECEPTOR. [Source:RefSeq;Acc:NM_131153] ENSDARG00000007325 (1) (75128 75128 76993 76994 126520) 4001 (4001 nt) [RECEPTOR; RECEPTOR; RECEPTOR;] [Retinoid X receptor:Retinoid X receptor; Steroid hormone receptor:Steroid hormone receptor; Zn-finger, C4-type steroid receptor:Zn-finger, C4-type steroid receptor; Vitamin D receptor:Vitamin D receptor; Transcriptio…	3	69.56	345	SINFRUG00000151668 (dre-miR-18-1)		fru-mir-18-1b dre-mir-18-2 dre-mir-18-2b fru-mir-18-1a dre-mir-18-1	GO:0003707->steroid hormone receptor activity GO:0006350->transcription GO:0003700->transcription factor activity GO:0004879->ligand-dependent nuclear receptor activity GO:0005634->nucleus GO:0005634->nucleus GO:0003677->DNA binding GO:0003677->DNA binding GO:0004872->receptor activity GO:0006355->regulation of transcription, DNA-dependent GO:0006355->regulation of transcription, DNA-dependent	3' AUAGACGUGAUCUACGUGGAAU 5' dre-mir-18-1 __ .|.||||.||:.|||||:|||| __ 5' CAGCUGCUCUGAAUGCAUCUUA 3' ENSDART00000011772_P E:-24.92 S:119.000000 Loc:1073 Cons: 77.27%(fru)	3' AUAGACGUGAUCUACGUGGAAU 5' dre-mir-18-1 __ .|.||||.||:.|||||::||| __ 5' CAGCUGCUCUGAAUGCAUUUUA 3' ENSDART00000011772_P E:-22.32 S:113.000000 Loc:632 Cons: 72.73%(fru)	3' AUAGACGUGAUCUACGUGGAAU 5' dre-mir-18-1 __ .|.||||.||:.|||||::||| __ 5' CAGCUGCUCUGAAUGCAUUUUA 3' ENSDART00000011772_P E:-22.32 S:113.000000 Loc:852 Cons: 72.73%(fru)
dre-mir-93	ENSDART00000005560_P	ENSDARG00000009307	SINFRUG00000148049		ENSDARG00000009307 4001 (4001 nt) [UNKNOWN;] [Zn-finger, RING:Zn-finger, RING;]	3	62.04	340	SINFRUG00000148049 (dre-miR-93)		dre-mir-144 dre-mir-199-as dre-mir-26-1d fru-mir-26-1c fru-mir-9g dre-mir-9e dre-mir-9c dre-mir-9f dre-mir-9a dre-mir-9b dre-mir-9d fru-mir-93-1b dre-mir-93		3' GAUGGACGUGUUUGUCGUG-AAA 5' dre-mir-93 __ .||:|||:|:.|:||||||.||| __ 5' GUAUCUGUAU-AGCAGCACAUUU 3' ENSDART00000005560_P E:-23.34 S:116.000000 Loc:1644 Cons: 77.27%(fru)	3' GAUGGACGUGUUUGUCGUGA-AA 5' dre-mir-93 __ :|:::|.:||.|||||||||.|| __ 5' UUGUUUAUAC-AACAGCACUCUU 3' ENSDART00000005560_P E:-18.530001 S:113.000000 Loc:2330 Cons: 72.73%(fru)	3' GAUGGACGUGUUUGUCGUGAAA 5' dre-mir-93 __ .||.|||||.|.|:||||:||| __ 5' GUA-CUGCAAAUAUAGCAUUUU 3' ENSDART00000005560_P E:-20.17 S:111.000000 Loc:1456 Cons: 71.43%(fru)
dre-mir-122a	ENSDART00000013782_P	ENSDARG00000005969	SINFRUG00000132742		ENSDARG00000005969 4001 (4001 nt) [AMBIGUOUS; AMBIGUOUS;] [Zn-finger, C2H2 type:Zn-finger, C2H2 type; Zn-finger, C2HC type:Zn-finger, C2HC type; MOZ/SAS-like protein:MOZ/SAS-like protein; Zn-finger, C2H2 type:Zn-finger, C2H2 type; Zn-finger, C2HC type:Zn-finger, C2HC type; MOZ/SAS-like protein:MOZ/SAS-like protein;]	3	63.07	313	SINFRUG00000132742 (fru-miR-122a)		dre-mir-122a		3' UGUUUGUGGUAACAGUGUGAGGU 5' dre-mir-122a __ |.|||||:.:|||.||||:|:|| __ 5' AGAAACAUGGUUGACACAUUUCA 3' ENSDART00000013782_P E:-22.6 S:120.000000 Loc:151 Cons: 73.91%(fru)	3' UGUUUG--UGGUAA-C-AGUGUGAGGU 5' dre-mir-122a __ |:||:|...|:|||.|.|:|||||::| __ 5' AUAAGCUUUCUAUUGGUUUACACUUUA 3' ENSDART00000013782_P E:-20.780001 S:101.000000 Loc:1127 Cons: 70.37%(fru)	3' UGUUUGUGGUAACAGUGUGAGGU 5' dre-mir-122a __ .||.:||||..|||.|.|||||| __ 5' UCAUGCACC--UGU-AGACUCCA 3' ENSDART00000013782_P E:-19.690001 S:92.000000 Loc:721 Cons: 70.00%(fru)
dre-mir-93	ENSDART00000026794_P	ENSDARG00000006797	SINFRUG00000139361		ENSDARG00000006797 4001 (4001 nt) [AMBIGUOUS;] []	3	57.25	312	SINFRUG00000139361 (dre-miR-93)		dre-mir-1-2c dre-mir-1-2b fru-mir-93-2b dre-mir-93		3' GAUGGACGUGUUUGUCGUGAAA 5' dre-mir-93 __ ..::|||.:|.||.|||||||| __ 5' AGGUCUG-GC-AAGAGCACUUU 3' ENSDART00000026794_P E:-19.15 S:104.000000 Loc:813 Cons: 70.00%(fru)	3' GAUGGACGUGUUUGUCGUGAAA 5' dre-mir-93 __ ..::|||.:|:||.|||||||| __ 5' AGGUCUG-GCGAA-AGCACUUU 3' ENSDART00000026794_P E:-18.950001 S:104.000000 Loc:998 Cons: 70.00%(fru)	3' GAUGGACGUGUUUGUCGUGAAA 5' dre-mir-93 __ ..::|||.:|.||.|||||||| __ 5' AGGUCUG-GC-AAGAGCACUUU 3' ENSDART00000026794_P E:-19.15 S:104.000000 Loc:1183 Cons: 70.00%(fru)
dre-mir-19-1d	ENSDART00000004665_P	ENSDARG00000010254	SINFRUG00000122403		ENSDARG00000010254 4001 (4001 nt) [TBC1 DOMAIN FAMILY MEMBER 2 PROSTATE ANTIGEN RECOGNIZED AND INDENTIFIED BY SEREX PARIS 1;] [Pleckstrin-like:Pleckstrin-like;]	3	52.47	309	SINFRUG00000122403 (dre-miR-19-1d)		dre-mir-19-1a dre-mir-19-1d dre-mir-19-1b dre-mir-19-1c dre-mir-34-2b dre-mir-34-3a		3' AGUCAAAACGUAC-CUAAAC-GUGU 5' dre-mir-19-1d __ |:|.|||||:|||.||||.|.|||| __ 5' UUA-UUUUGUAUGUGAUUAGUCACA 3' ENSDART00000004665_P E:-17.49 S:103.000000 Loc:571 Cons: 70.83%(fru)	3' AGUCAAAACGUAC-CUAAAC-GUGU 5' dre-mir-19-1d __ |:|.|||||:|||.||||.|.|||| __ 5' UUA-UUUUGUAUGUGAUUAGUCACA 3' ENSDART00000004665_P E:-17.49 S:103.000000 Loc:765 Cons: 70.83%(fru)	3' AGUCAAAACGUAC-CUAAAC-GUGU 5' dre-mir-19-1d __ |:|.|||||:|||.||||.|.|||| __ 5' UUA-UUUUGUAUGUGAUUAGUCACA 3' ENSDART00000004665_P E:-17.49 S:103.000000 Loc:959 Cons: 70.83%(fru)
dre-mir-19-1b	ENSDART00000004665_P	ENSDARG00000010254	SINFRUG00000122403		ENSDARG00000010254 4001 (4001 nt) [TBC1 DOMAIN FAMILY MEMBER 2 PROSTATE ANTIGEN RECOGNIZED AND INDENTIFIED BY SEREX PARIS 1;] [Pleckstrin-like:Pleckstrin-like;]	3	52.47	309	SINFRUG00000122403 (dre-miR-19-1b)		dre-mir-19-1a dre-mir-19-1d dre-mir-19-1b dre-mir-19-1c dre-mir-34-2b dre-mir-34-3a		3' AGUCAAAACGUAC-CUAAAC-GUGU 5' dre-mir-19-1b __ |:|.|||||:|||.||||.|.|||| __ 5' UUA-UUUUGUAUGUGAUUAGUCACA 3' ENSDART00000004665_P E:-17.49 S:103.000000 Loc:571 Cons: 70.83%(fru)	3' AGUCAAAACGUAC-CUAAAC-GUGU 5' dre-mir-19-1b __ |:|.|||||:|||.||||.|.|||| __ 5' UUA-UUUUGUAUGUGAUUAGUCACA 3' ENSDART00000004665_P E:-17.49 S:103.000000 Loc:765 Cons: 70.83%(fru)	3' AGUCAAAACGUAC-CUAAAC-GUGU 5' dre-mir-19-1b __ |:|.|||||:|||.||||.|.|||| __ 5' UUA-UUUUGUAUGUGAUUAGUCACA 3' ENSDART00000004665_P E:-17.49 S:103.000000 Loc:959 Cons: 70.83%(fru)
dre-mir-93	ENSDART00000004047_P	ENSDARG00000011904	SINFRUG00000143786		ENSDARG00000011904 4001 (4001 nt) [CYCLIC AMP DEPENDENT TRANSCRIPTION FACTOR ATF 3 ACTIVATING TRANSCRIPTION FACTOR 3;] [Fos transforming protein:Fos transforming protein; Basic-leucine zipper (bZIP) transcription factor:Basic-leucine zipper (bZIP) transcription factor;]	3	68.71	303	SINFRUG00000143786 (dre-miR-93)		dre-mir-1-2a dre-mir-93		3' GAUGGACGUGUUUGUCGUGAAA 5' dre-mir-93 __ :||||||..|..|||||||||. __ 5' UUACCUG--C--ACAGCACUUA 3' ENSDART00000004047_P E:-24.190001 S:105.000000 Loc:2189 Cons: 72.22%(fru)	3' GAUGGACGUGUUUGUCGUGAAA 5' dre-mir-93 __ :||||||..|..||||:||||. __ 5' UUACCUG--C--ACAGUACUUA 3' ENSDART00000004047_P E:-22.26 S:99.000000 Loc:2425 Cons: 72.22%(fru)	3' GAUGGACGUGUUUGUCGUGAAA 5' dre-mir-93 __ :||||||..|..||||:||||. __ 5' UUACCUG--C--ACAGUACUUA 3' ENSDART00000004047_P E:-22.26 S:99.000000 Loc:2662 Cons: 72.22%(fru)
dre-mir-138-1	ENSDART00000025782_P	ENSDARG00000003487	SINFRUG00000137352		DEAD EYE. [Source:RefSeq;Acc:NM_130981] ENSDARG00000003487 (-1) (585722 585722 623242 623254 579773) 4001 (4001 nt) [AMBIGUOUS; AMBIGUOUS;] [Nucleoporin interacting component:Nucleoporin interacting component; Nucleoporin interacting component:Nucleoporin interacting component;]	3	64.98	298	SINFRUG00000137352 (fru-miR-138-1)		dre-mir-138-2 dre-mir-138-1 fru-mir-17-1e-as dre-mir-200a-1a fru-mir-29-12b dre-mir-let7l-a dre-mir-let7l-a1 dre-mir-let7l-a2 dre-mir-let7l-b1 dre-mir-let7l-c1 fru-mir-let7l-c2 dre-mir-let7l-d1 fru-mir-let7l-d2		3' CGGACUAAGUGUUGUGGUCGA 5' dre-mir-138-1 __ |.||..|||||||||||||.. __ 5' GGCUAUUUCACAACACCAGGG 3' ENSDART00000025782_P E:-25.24 S:116.000000 Loc:2586 Cons: 100.00%(fru)	3' CGGACUAAGUGUUGUGGUCGA 5' dre-mir-138-1 __ ||:|||||...||.|||.||| __ 5' GCUUGAUU---AAGACCUGCU 3' ENSDART00000025782_P E:-17.030001 S:91.000000 Loc:2430 Cons: 72.22%(fru)	3' CGGACUA-AGUGUUGUGGUCGA 5' dre-mir-138-1 __ |||.|||.||||.||::||||. __ 5' GCC-GAUGUCAC-ACGUCAGCG 3' ENSDART00000025782_P E:-22.709999 S:91.000000 Loc:2559 Cons: 70.00%(fru)
dre-mir-204	ENSDART00000019716_P	ENSDARG00000005130	SINFRUG00000146237		ENSDARG00000005130 4001 (4001 nt) [AMBIGUOUS;] []	3	53.43	279	SINFRUG00000146237 (dre-miR-204)		dre-mir-204 fru-mir-204-1b		3' GUCCGUAUCCUACUGUUUCCCUU 5' dre-mir-204 __ ||||:|.|.|..|||::|.|||. __ 5' CAGGUAGAUG--GACGGACGGAC 3' ENSDART00000019716_P E:-17.809999 S:93.000000 Loc:798 Cons: 71.43%(fru)	3' GUCCGUAUCCUACUGUUUCCCUU 5' dre-mir-204 __ ||||:|.|.|..|||::|.|||. __ 5' CAGGUAGAUG--GACGGACGGAC 3' ENSDART00000019716_P E:-17.809999 S:93.000000 Loc:1030 Cons: 71.43%(fru)	3' GUCCGUAUCCUACUGUUUCCCUU 5' dre-mir-204 __ ||||:|.|.|..|||::|.|||. __ 5' CAGGUAGAUG--GACGGACGGAC 3' ENSDART00000019716_P E:-17.809999 S:93.000000 Loc:1254 Cons: 71.43%(fru)
fru-mir-204-1b	ENSDART00000019716_P	ENSDARG00000005130	SINFRUG00000146237		ENSDARG00000005130 4001 (4001 nt) [AMBIGUOUS;] []	3	53.43	279	SINFRUG00000146237 (fru-miR-204-1b)		dre-mir-204 fru-mir-204-1b		3' GUCCGUAUCCUACUGUUUCCCUU 5' fru-mir-204-1b __ ||||:|.|.|..|||::|.|||. __ 5' CAGGUAGAUG--GACGGACGGAC 3' ENSDART00000019716_P E:-17.809999 S:93.000000 Loc:798 Cons: 71.43%(fru)	3' GUCCGUAUCCUACUGUUUCCCUU 5' fru-mir-204-1b __ ||||:|.|.|..|||::|.|||. __ 5' CAGGUAGAUG--GACGGACGGAC 3' ENSDART00000019716_P E:-17.809999 S:93.000000 Loc:1030 Cons: 71.43%(fru)	3' GUCCGUAUCCUACUGUUUCCCUU 5' fru-mir-204-1b __ ||||:|.|.|..|||::|.|||. __ 5' CAGGUAGAUG--GACGGACGGAC 3' ENSDART00000019716_P E:-17.809999 S:93.000000 Loc:1254 Cons: 71.43%(fru)
dre-mir-15-1b	ENSDART00000016130_P	ENSDARG00000020006	SINFRUG00000122967		ENSDARG00000020006 4001 (4001 nt) [ZINC FINGER; ZINC FINGER; ZINC FINGER;] [Zn-finger, C2H2 type:Zn-finger, C2H2 type; Zfx / Zfy transcription activation region:Zfx / Zfy transcription activation region; Zn-finger, C2H2 type:Zn-finger, C2H2 type; Zfx / Zfy transcription activation region:Zfx / Zfy transcription activation region; Zn-finger, C2H2 type:Zn-finger, C2H2 type; Zfx / Zfy transcription …	2	46.45	245	SINFRUG00000122967 (dre-miR-15-1b)		dre-mir-15-1a dre-mir-15-1b		3' GUGUUUGGUAAGACACGACGAU 5' dre-mir-15-1b __ ||||.|:||.||||||:||:|| __ 5' CACAUAUCACUCUGUGUUGUUA 3' ENSDART00000016130_P E:-26.67 S:134.000000 Loc:1007 Cons: 72.73%(fru)	3' GUGUUUGGUAAGACACGACGAU 5' dre-mir-15-1b __ ||:|||.|...:|||||||||. __ 5' CAUAAAAC---UUGUGCUGCUU 3' ENSDART00000016130_P E:-19.780001 S:111.000000 Loc:361 Cons: 73.68%(fru)
fru-mir-93-1b	ENSDART00000005560_P	ENSDARG00000009307	SINFRUG00000148049		ENSDARG00000009307 4001 (4001 nt) [UNKNOWN;] [Zn-finger, RING:Zn-finger, RING;]	2	41.24	232	SINFRUG00000148049 (fru-miR-93-1b)		dre-mir-144 dre-mir-199-as dre-mir-26-1d fru-mir-26-1c fru-mir-9g dre-mir-9e dre-mir-9c dre-mir-9f dre-mir-9a dre-mir-9b dre-mir-9d fru-mir-93-1b dre-mir-93		3' GAUGGACGUGUUUGUCGUGAAAAC 5' fru-mir-93-1b __ .||:|||:|:.|:||||||.|||. __ 5' GUAUCUGUAU-AGCAGCACAUUUC 3' ENSDART00000005560_P E:-23.02 S:119.000000 Loc:1644 Cons: 73.91%(fru)	3' GAUGGACGUGUUUGUCGUGA-AAAC 5' fru-mir-93-1b __ :|:::|.:||.|||||||||.|||. __ 5' UUGUUUAUAC-AACAGCACUCUUUC 3' ENSDART00000005560_P E:-18.219999 S:113.000000 Loc:2330 Cons: 70.83%(fru)
dre-mir-135-1a	ENSDART00000022937	ENSDARG00000013502	SINFRUG00000121560		ENSDARG00000013502 937 (937 nt) [WILMS' TUMOR; WILMS' TUMOR;] [Wilm's tumour protein:Wilm's tumour protein; Zn-finger, C2H2 type:Zn-finger, C2H2 type; Wilm's tumour protein:Wilm's tumour protein; Zn-finger, C2H2 type:Zn-finger, C2H2 type;]	2	48.41	227	SINFRUG00000121560 (fru-miR-135-1a)		dre-mir-135-2a dre-mir-135-2b dre-mir-135-3a dre-mir-135-1a fru-mir-135-1b fru-mir-17-1e-as		3' AGUGUAUCCUUAUUUUUCGGUAU 5' dre-mir-135-1a __ .||||.|||::..|||||||:|| __ 5' ACACACAGGGG--AAAAGCCGUA 3' ENSDART00000022937 E:-25.09 S:118.000000 Loc:721 Cons: 80.95%(fru)	3' AGUGUAUCCUUAUUUUUCGGUAU 5' dre-mir-135-1a __ .||||.|||..|:|:|||||:|. __ 5' ACACACAGG--UGAGAAGCCGUU 3' ENSDART00000022937 E:-23.32 S:109.000000 Loc:811 Cons: 76.19%(fru)
dre-mir-133-1b	ENSDART00000027584_P	ENSDARG00000001891	SINFRUG00000154558		ENSDARG00000001891 4001 (4001 nt) [SYNAPTOTAGMIN;] [C2 domain:C2 domain;]	2	54.7	225	SINFRUG00000154558 (fru-miR-133-1b)		dre-mir-133-1b dre-mir-133-1a dre-mir-184		3' UGUCGACCAACUUCCCCUGGUU 5' dre-mir-133-1b __ |:||..|||||.|||||||||| __ 5' AUAG--GGUUGCAGGGGACCAA 3' ENSDART00000027584_P E:-30.049999 S:126.000000 Loc:1487 Cons: 70.00%(fru)	3' UGUCGACCAACUUCCCCUGGUU 5' dre-mir-133-1b __ ||.|:..|.|.:||||||::|| __ 5' ACUGUCAGCU-GAGGGGAUUAA 3' ENSDART00000027584_P E:-24.65 S:99.000000 Loc:963 Cons: 71.43%(fru)
dre-mir-133-1a	ENSDART00000027584_P	ENSDARG00000001891	SINFRUG00000154558		ENSDARG00000001891 4001 (4001 nt) [SYNAPTOTAGMIN;] [C2 domain:C2 domain;]	2	54.7	225	SINFRUG00000154558 (fru-miR-133-1a)		dre-mir-133-1b dre-mir-133-1a dre-mir-184		3' UGUCGACCAACUUCCCCUGGUU 5' dre-mir-133-1a __ |:||..|||||.|||||||||| __ 5' AUAG--GGUUGCAGGGGACCAA 3' ENSDART00000027584_P E:-30.049999 S:126.000000 Loc:1487 Cons: 70.00%(fru)	3' UGUCGACCAACUUCCCCUGGUU 5' dre-mir-133-1a __ ||.|:..|.|.:||||||::|| __ 5' ACUGUCAGCU-GAGGGGAUUAA 3' ENSDART00000027584_P E:-24.65 S:99.000000 Loc:963 Cons: 71.43%(fru)
dre-mir-200a-1a	ENSDART00000022893_P	ENSDARG00000004693	SINFRUG00000140487		ENSDARG00000004693 4001 (4001 nt) [CGI 20;] [Protein of unknown function DUF410:Protein of unknown function DUF410;]	2	40.91	225	SINFRUG00000140487 (fru-miR-200a-1a)		dre-mir-15-1b dre-mir-200a-1a		3' UUUGUAGCAAUG-GUCUGUCACAA-UCUU 5' dre-mir-200a-1a __ .||:||:||||:.:|||:|.||||.|||| __ 5' CAAUAUUGUUAUGUAGAUA-UGUUCAGAA 3' ENSDART00000022893_P E:-22.74 S:117.000000 Loc:550 Cons: 71.43%(fru)	3' UUUGUAGCAAUG-GUCUGUCAC-AAUCUU 5' dre-mir-200a-1a __ |||:||:.|||:.:|||:.|||.||||:| __ 5' AAAUAUUAUUAUGUAGAU-GUGUUUAGGA 3' ENSDART00000022893_P E:-18.17 S:108.000000 Loc:418 Cons: 71.43%(fru)
fru-mir-304	ENSDART00000008520_P	ENSDARG00000004994	SINFRUG00000154389		ENSDARG00000004994 4001 (4001 nt) [3 BETA HYDROXYSTEROID DELTA 8 DELTA 7 ISOMERASE EC_5.3.3.5 CHOLESTENOL DELTA ISOMERASE DELTA8 DELTA7 STEROL ISOMERASE D8 D7 STEROL ISOMERASE EMOPAMIL BINDING;] []	2	41.73	224	SINFRUG00000154389 (fru-miR-304)		dre-mir-20-2a dre-mir-20-2b fru-mir-304 fru-mir-33-1a fru-mir-33b fru-mir-33-1b		3' GAGUGUAAAUGUGUGACUAUGCU 5' fru-mir-304 __ ||||.||.|.|||||||.||||| __ 5' CUCA-AUAU-CACACUGUUACGA 3' ENSDART00000008520_P E:-23.16 S:120.000000 Loc:2534 Cons: 71.43%(fru)	3' GAGUGUAAAUGUGU-GACUAUGCU 5' fru-mir-304 __ .||.:||||.||||.||||||.|| __ 5' GUC-UAUUU-CACAUCUGAUAGGA 3' ENSDART00000008520_P E:-18.57 S:104.000000 Loc:1764 Cons: 77.27%(fru)
dre-mir-106-b1	ENSDART00000012092_P	ENSDARG00000004125	SINFRUG00000150328		ENSDARG00000004125 4001 (4001 nt) [DEVELOPMENTALLY REGULATED GTP BINDING DRG; DEVELOPMENTALLY REGULATED GTP BINDING DRG; DEVELOPMENTALLY REGULATED GTP BINDING DRG;] [GTP1/OBG:GTP1/OBG; GTP1/OBG sub-domain:GTP1/OBG sub-domain; TGS domain:TGS domain; GTP1/OBG:GTP1/OBG; GTP1/OBG sub-domain:GTP1/OBG sub-domain; TGS domain:TGS domain; GTP1/OBG:GTP1/OBG; GTP1/OBG sub-domain:GTP1/OBG sub-domain; TGS dom…	2	39.45	223	SINFRUG00000150328 (dre-miR-106-b1)		fru-mir-106-b2 dre-mir-106-b1 dre-mir-138-2 dre-mir-138-1 dre-mir-192-1a dre-mir-20-1 dre-mir-20-1b fru-mir-93-2a fru-mir-93-1b dre-mir-93		3' AUGGACG--UGAUAU--UCGUGAAAU 5' dre-mir-106-b1 __ ..||||:..|:||||..||||||||| __ 5' CCCCUGUAAAUUAUAGCAGCACUUUA 3' ENSDART00000012092_P E:-21.51 S:119.000000 Loc:2430 Cons: 80.77%(fru)	3' AUGGACGUGAUAUUCGU-GAAAU 5' dre-mir-106-b1 __ .::|||..||.||||||.||||: __ 5' AGUCUG--CUUUAAGCAGCUUUG 3' ENSDART00000012092_P E:-17.940001 S:104.000000 Loc:1972 Cons: 71.43%(fru)
dre-mir-130-2a	ENSDART00000013284_P	ENSDARG00000002115	SINFRUG00000130637		ENSDARG00000002115 4001 (4001 nt) [AMBIGUOUS;] [M protein repeat:M protein repeat;]	2	39.26	221	SINFRUG00000130637 (dre-miR-130-2a)		dre-mir-130-2a fru-mir-24-3		3' UACGGGAA-AGUAAUAACGUGAC 5' dre-mir-130-2a __ .|.|::||.||.||:|||||:|| __ 5' CUUCUUUUCUCUUUGUUGCAUUG 3' ENSDART00000013284_P E:-21.24 S:118.000000 Loc:976 Cons: 73.91%(fru)	3' UACGGGAAAGUAAUAACGUGAC 5' dre-mir-130-2a __ .||||:|.||.||:||||..|| __ 5' UUGCCUUGUCCUUGUUGCUGUG 3' ENSDART00000013284_P E:-18.02 S:103.000000 Loc:165 Cons: 72.73%(fru)
dre-mir-93	ENSDART00000008486_P	ENSDARG00000018983	SINFRUG00000138498		ENSDARG00000018983 4001 (4001 nt) [COA CARBOXYLASE ALPHA CHAIN MITOCHONDRIAL PRECURSOR ALPHA SUBUNIT COA:CARBON DIOXIDE LIGASE ALPHA SUBUNIT;] [HMG-CoA lyase-like:HMG-CoA lyase-like; Biotin carboxylase, C-terminal:Biotin carboxylase, C-terminal;]	2	37.7	219	SINFRUG00000138498 (dre-miR-93)		dre-mir-103-3b dre-mir-107-2 fru-mir-183-3 dre-mir-93		3' GAUGGACGUGUUUGU-CGUGAAA 5' dre-mir-93 __ .||.|||..||||||.||||||| __ 5' AUAGCUG--CAAACAUGCACUUU 3' ENSDART00000008486_P E:-20.360001 S:116.000000 Loc:2388 Cons: 71.43%(fru)	3' GAUGGACGUGUUUGUCGUGAAA 5' dre-mir-93 __ ||:|:||||.|||.|.||:||| __ 5' CUGCUUGCAAAAAGA-CAUUUU 3' ENSDART00000008486_P E:-17.34 S:103.000000 Loc:2740 Cons: 71.43%(fru)
fru-mir-17-1e	ENSDART00000026650_P	ENSDARG00000013237	SINFRUG00000155637		ENSDARG00000013237 4001 (4001 nt) [UNKNOWN;] []	2	40.18	218	SINFRUG00000155637 (fru-miR-17-1e)		fru-mir-106-b2 dre-mir-106-b1 dre-mir-133-1b dre-mir-133-1a fru-mir-17-1e dre-mir-17-1a dre-mir-17-1b dre-mir-17-1c dre-mir-20-1b dre-mir-20-1 fru-mir-93-1a		3' UGAUGGACGUGACAUU-CGUGAAAU 5' fru-mir-17-1e __ |:|..|||:|||||||..:|:|||| __ 5' AUUCACUGUACUGUAACUUAUUUUA 3' ENSDART00000026650_P E:-21.52 S:109.000000 Loc:434 Cons: 84.00%(fru)	3' UGAUG-GACGUGACAUUCGUGAAAU 5' fru-mir-17-1e __ |:.:|.||.:||||||||:::|||. __ 5' AUAGCACU-UACUGUAAGUGUUUUU 3' ENSDART00000026650_P E:-18.66 S:109.000000 Loc:528 Cons: 70.83%(fru)
dre-mir-17-1c	ENSDART00000026650_P	ENSDARG00000013237	SINFRUG00000155637		ENSDARG00000013237 4001 (4001 nt) [UNKNOWN;] []	2	37.67	218	SINFRUG00000155637 (fru-miR-17-1c)		fru-mir-106-b2 dre-mir-106-b1 dre-mir-133-1b dre-mir-133-1a fru-mir-17-1e dre-mir-17-1a dre-mir-17-1b dre-mir-17-1c dre-mir-20-1b dre-mir-20-1 fru-mir-93-1a		3' UGAUGGACGUGAUAUU-CGUGAAAU 5' dre-mir-17-1c __ :||.|||||.:|.|||.|:|:|||| __ 5' GCUCCCUGC-UUUUAAUGUAUUUUA 3' ENSDART00000026650_P E:-18.139999 S:112.000000 Loc:489 Cons: 70.83%(fru)	3' UGAUGGACGUGAUAUU-CGUGAAAU 5' dre-mir-17-1c __ |:|..|||:|||:|||..:|:|||| __ 5' AUUCACUGUACUGUAACUUAUUUUA 3' ENSDART00000026650_P E:-19.530001 S:106.000000 Loc:434 Cons: 84.00%(fru)
dre-mir-141-1a	ENSDART00000014284_P	ENSDARG00000012400	SINFRUG00000152722		ENSDARG00000012400 2776 (2776 nt) [AMBIGUOUS;] []	2	35.9	217	SINFRUG00000152722 (fru-miR-141-1a)		dre-mir-103-1a dre-mir-103-2a dre-mir-107-1b dre-mir-141-1a dre-mir-141-1b fru-mir-19-3a		3' CGUAGCAAUGGUCUGUCACAA 5' dre-mir-141-1a __ .:||..||||:||||.||||| __ 5' UUAU--UUACUAGACUGUGUU 3' ENSDART00000014284_P E:-18.120001 S:110.000000 Loc:1611 Cons: 84.21%(fru)	3' CGUAGCAAUGGUCUGUCACAA 5' dre-mir-141-1a __ .:|||..||.|||||||.||| __ 5' UUAUC-AUAGCAGACAGCGUU 3' ENSDART00000014284_P E:-17.780001 S:107.000000 Loc:1777 Cons: 75.00%(fru)
dre-mir-17-1a	ENSDART00000013932_P	ENSDARG00000004702	SINFRUG00000139126		ENSDARG00000004702 4001 (4001 nt) [UNKNOWN; UNKNOWN;] []	2	43.54	217	SINFRUG00000139126 (fru-miR-17-1a)		dre-mir-106-b1 fru-mir-106-b2 dre-mir-106-a1 dre-mir-17-1a fru-mir-17-1e dre-mir-17-1b dre-mir-17-1d dre-mir-17-1c dre-mir-18-1 dre-mir-18-3b dre-mir-18-2b fru-mir-18-1a fru-mir-18-1b dre-mir-18-2 dre-mir-18-3a fru-mir-18-3 dre-mir-20-1b dre-mir-20-2a dre-mir-20-1 dre-mir-20-2b fru-mir-33-1b fru-mir-33-1a fru-mir-33b fru-mir-93-2a fru-mir-93-1a fru-mir-93-2b fru-mir-93-1b		3' UGAUGGACGUG-ACAUUCGUGAAAC 5' dre-mir-17-1a __ .|||.|||:||.||||.||||||.. __ 5' UCUAGCUGUACUUGUAUGCACUUGU 3' ENSDART00000013932_P E:-25.77 S:115.000000 Loc:410 Cons: 92.00%(fru)	3' UGAUGGACG-UGACAU--UCGUGAAAC 5' dre-mir-17-1a __ ||||..|||.|||.||..|||||||.| __ 5' ACUA-AUGCAACUCUACGAGCACUUGG 3' ENSDART00000013932_P E:-17.77 S:102.000000 Loc:349 Cons: 88.46%(fru)
dre-mir-204	ENSDART00000007598	ENSDARG00000015884	SINFRUG00000143627		ENSDARG00000015884 1275 (1275 nt) [TESTICAN 2 PRECURSOR SPARC/OSTEONECTIN CWCV AND KAZAL DOMAINS PROTEOGLYCAN 2; TESTICAN 2 PRECURSOR SPARC/OSTEONECTIN CWCV AND KAZAL DOMAINS PROTEOGLYCAN 2; TESTICAN 2 PRECURSOR SPARC/OSTEONECTIN CWCV AND KAZAL DOMAINS PROTEOGLYCAN 2;] [Serine protease inhibitor, Kazal type:Serine protease inhibitor, Kazal type; Thyroglobulin type-1:Thyroglobulin type-1; Serine p…	2	49.1	216	SINFRUG00000134469 (dre-miR-204)		dre-mir-142-2a dre-mir-143-1a fru-mir-204-1a dre-mir-204 fru-mir-204-1b		3' GUCCGUAUCCUACUGUUUCCCUU 5' dre-mir-204 __ .||||..||||.||.:|||||:| __ 5' GAGGCCGAGGAGGAAGAAGGGGA 3' ENSDART00000007598 E:-26.23 S:113.000000 Loc:823 Cons: 86.96%(fru)	3' GUCCGUAUCCUACUGUUUC-CCUU 5' dre-mir-204 __ |.||.||:|||.||::|:|.|||: __ 5' CUGGGAUGGGAAGAUGAGGAGGAG 3' ENSDART00000007598 E:-22.870001 S:103.000000 Loc:774 Cons: 70.83%(fru)
fru-mir-204-1b	ENSDART00000007598	ENSDARG00000015884	SINFRUG00000143627		ENSDARG00000015884 1275 (1275 nt) [TESTICAN 2 PRECURSOR SPARC/OSTEONECTIN CWCV AND KAZAL DOMAINS PROTEOGLYCAN 2; TESTICAN 2 PRECURSOR SPARC/OSTEONECTIN CWCV AND KAZAL DOMAINS PROTEOGLYCAN 2; TESTICAN 2 PRECURSOR SPARC/OSTEONECTIN CWCV AND KAZAL DOMAINS PROTEOGLYCAN 2;] [Serine protease inhibitor, Kazal type:Serine protease inhibitor, Kazal type; Thyroglobulin type-1:Thyroglobulin type-1; Serine p…	2	49.1	216	SINFRUG00000134469 (fru-miR-204-1b)		dre-mir-142-2a dre-mir-143-1a fru-mir-204-1a dre-mir-204 fru-mir-204-1b		3' GUCCGUAUCCUACUGUUUCCCUU 5' fru-mir-204-1b __ .||||..||||.||.:|||||:| __ 5' GAGGCCGAGGAGGAAGAAGGGGA 3' ENSDART00000007598 E:-26.23 S:113.000000 Loc:823 Cons: 86.96%(fru)	3' GUCCGUAUCCUACUGUUUC-CCUU 5' fru-mir-204-1b __ |.||.||:|||.||::|:|.|||: __ 5' CUGGGAUGGGAAGAUGAGGAGGAG 3' ENSDART00000007598 E:-22.870001 S:103.000000 Loc:774 Cons: 70.83%(fru)
dre-mir-122a	ENSDART00000024172_P	ENSDARG00000007181	SINFRUG00000148160		ENSDARG00000007181 4001 (4001 nt) [AMBIGUOUS; AMBIGUOUS;] []	2	42.75	215	SINFRUG00000148160 (fru-miR-122a)		dre-mir-122a		3' UGUUUGUGGUAACAGUGUGAG-GU 5' dre-mir-122a __ .|.|||||.||||||||::||.|| __ 5' UCCAACACAAUUGUCACGUUCACA 3' ENSDART00000024172_P E:-25.1 S:121.000000 Loc:1219 Cons: 70.83%(fru)	3' UGUUUGUGG--UAACAGU-GUGAGGU 5' dre-mir-122a __ ||.|.||::..|||||||.||:.:|| __ 5' ACCACCAUUAGAUUGUCACCAUAUCA 3' ENSDART00000024172_P E:-17.65 S:94.000000 Loc:182 Cons: 73.08%(fru)
fru-mir-106-b2	ENSDART00000012092_P	ENSDARG00000004125	SINFRUG00000150328		ENSDARG00000004125 4001 (4001 nt) [DEVELOPMENTALLY REGULATED GTP BINDING DRG; DEVELOPMENTALLY REGULATED GTP BINDING DRG; DEVELOPMENTALLY REGULATED GTP BINDING DRG;] [GTP1/OBG:GTP1/OBG; GTP1/OBG sub-domain:GTP1/OBG sub-domain; TGS domain:TGS domain; GTP1/OBG:GTP1/OBG; GTP1/OBG sub-domain:GTP1/OBG sub-domain; TGS domain:TGS domain; GTP1/OBG:GTP1/OBG; GTP1/OBG sub-domain:GTP1/OBG sub-domain; TGS dom…	2	35.81	215	SINFRUG00000150328 (fru-miR-106-b2)		fru-mir-106-b2 dre-mir-106-b1 dre-mir-138-2 dre-mir-138-1 dre-mir-192-1a dre-mir-20-1 dre-mir-20-1b fru-mir-93-2a fru-mir-93-1b dre-mir-93		3' AUGGACG--UGACAU--UCGUGAAAU 5' fru-mir-106-b2 __ ..||||:..|:|.||..||||||||| __ 5' CCCCUGUAAAUUAUAGCAGCACUUUA 3' ENSDART00000012092_P E:-18.549999 S:111.000000 Loc:2430 Cons: 80.77%(fru)	3' AUGGACGUGACAUUCGU-GAAAU 5' fru-mir-106-b2 __ .::|||..||.||||||.||||: __ 5' AGUCUG--CUUUAAGCAGCUUUG 3' ENSDART00000012092_P E:-17.26 S:104.000000 Loc:1972 Cons: 71.43%(fru)
dre-mir-138-1	ENSDART00000009532_P	ENSDARG00000018157	SINFRUG00000138407		ENSDARG00000018157 4001 (4001 nt) [AMBIGUOUS;] []	2	37.96	214	SINFRUG00000138407 (fru-miR-138-1)		dre-mir-138-2 dre-mir-138-1 dre-mir-142-2a-as dre-mir-142-1a-as		3' CGGACUAAGUGUUGUGGUCGA 5' dre-mir-138-1 __ |.||.||.|:|||||.||||| __ 5' GGCUCAUACGCAACA-CAGCU 3' ENSDART00000009532_P E:-18.98 S:107.000000 Loc:518 Cons: 70.00%(fru)	3' CGGACUAAGUGUUGUGGUCGA 5' dre-mir-138-1 __ |.||.||.|:|||||.||||| __ 5' GGCUCAUACGCAACA-CAGCU 3' ENSDART00000009532_P E:-18.98 S:107.000000 Loc:1303 Cons: 70.00%(fru)
dre-mir-98-3a	ENSDART00000011942_P	ENSDARG00000012785	SINFRUG00000131940		EMPTY SPIRACLES HOMEOBOX 2. [Source:RefSeq;Acc:NM_131280] ENSDARG00000012785 (1) (5848 5848 9574 9574 66095) 4001 (4001 nt) [HOMEOBOX;] [Homeobox:Homeobox; Helix-turn-helix motif, lambda-like repressor:Helix-turn-helix motif, lambda-like repressor;]	2	41.01	213	SINFRUG00000131940 (fru-miR-98-3a)		dre-mir-138-2 dre-mir-138-1 dre-mir-142-2a-as dre-mir-142-1a-as dre-mir-153-1b dre-mir-172 dre-mir-22-1 fru-mir-22-1a dre-mir-25 dre-mir-31 dre-mir-34 dre-mir-98-3a dre-mir-98-3b dre-mir-98-2a dre-mir-98-1a dre-mir-let7l-a dre-mir-let7l-a1 dre-mir-let7l-a2 dre-mir-let7l-b1 dre-mir-let7l-c1 fru-mir-let7l-c2 dre-mir-let7l-d1 fru-mir-let7l-d2	GO:0003700->transcription factor activity GO:0005634->nucleus GO:0005634->nucleus GO:0003677->DNA binding GO:0006355->regulation of transcription, DNA-dependent	3' UUGGU-GUGUUGGA-UGAUGGAGU 5' dre-mir-98-3a __ |.::|.:||||:||.||||||||. __ 5' AUUUAGUACAAUCUGACUACCUCU 3' ENSDART00000011942_P E:-23.629999 S:111.000000 Loc:1622 Cons: 87.50%(fru)	3' UUGGUGUGUUGGAUGAUGGAGU 5' dre-mir-98-3a __ |||:.||:.|.||.|||:|||: __ 5' AACUUCAUUA-CUCCUAUCUCG 3' ENSDART00000011942_P E:-17.379999 S:102.000000 Loc:2233 Cons: 100.00%(fru)
dre-mir-98-3b	ENSDART00000011942_P	ENSDARG00000012785	SINFRUG00000131940		EMPTY SPIRACLES HOMEOBOX 2. [Source:RefSeq;Acc:NM_131280] ENSDARG00000012785 (1) (5848 5848 9574 9574 66095) 4001 (4001 nt) [HOMEOBOX;] [Homeobox:Homeobox; Helix-turn-helix motif, lambda-like repressor:Helix-turn-helix motif, lambda-like repressor;]	2	41.01	213	SINFRUG00000131940 (fru-miR-98-3b)		dre-mir-138-2 dre-mir-138-1 dre-mir-142-2a-as dre-mir-142-1a-as dre-mir-153-1b dre-mir-172 dre-mir-22-1 fru-mir-22-1a dre-mir-25 dre-mir-31 dre-mir-34 dre-mir-98-3a dre-mir-98-3b dre-mir-98-2a dre-mir-98-1a dre-mir-let7l-a dre-mir-let7l-a1 dre-mir-let7l-a2 dre-mir-let7l-b1 dre-mir-let7l-c1 fru-mir-let7l-c2 dre-mir-let7l-d1 fru-mir-let7l-d2	GO:0003700->transcription factor activity GO:0005634->nucleus GO:0005634->nucleus GO:0003677->DNA binding GO:0006355->regulation of transcription, DNA-dependent	3' UUGGU-GUGUUGGA-UGAUGGAGU 5' dre-mir-98-3b __ |.::|.:||||:||.||||||||. __ 5' AUUUAGUACAAUCUGACUACCUCU 3' ENSDART00000011942_P E:-23.629999 S:111.000000 Loc:1622 Cons: 87.50%(fru)	3' UUGGUGUGUUGGAUGAUGGAGU 5' dre-mir-98-3b __ |||:.||:.|.||.|||:|||: __ 5' AACUUCAUUA-CUCCUAUCUCG 3' ENSDART00000011942_P E:-17.379999 S:102.000000 Loc:2233 Cons: 100.00%(fru)
dre-mir-184	ENSDART00000023194_P	ENSDARG00000009405	SINFRUG00000146652		ENSDARG00000009405 4001 (4001 nt) [ESTERASE;] [Neuroligin:Neuroligin; Carboxylesterase, type B:Carboxylesterase, type B;]	2	53.41	213	SINFRUG00000146652 (dre-miR-184)		dre-mir-184		3' CGGGAAUAGUCA-AGAGGCAGGU 5' dre-mir-184 __ ||||..|||:||.||||:||||: __ 5' GCCC--AUCGGUCUCUCUGUCCG 3' ENSDART00000023194_P E:-31.17 S:114.000000 Loc:628 Cons: 71.43%(fru)	3' CGGGAAUAGUCAAGA-GGCAGGU 5' dre-mir-184 __ ...||||.|||||||.|:|||.| __ 5' AAACUUA-CAGUUCUGCUGUCAA 3' ENSDART00000023194_P E:-22.24 S:99.000000 Loc:298 Cons: 72.73%(fru)
dre-mir-34-2b	ENSDART00000002362	ENSDARG00000015905	SINFRUG00000145924		ENSDARG00000015905 1699 (1699 nt) [LEUCINE ZIPPER TRANSCRIPTIONAL REGULATOR 1 LZTR 1; LEUCINE ZIPPER TRANSCRIPTIONAL REGULATOR 1 LZTR 1;] [BTB/POZ domain:BTB/POZ domain; Kelch repeat:Kelch repeat; BTB/POZ domain:BTB/POZ domain; Kelch repeat:Kelch repeat;]	2	41.89	213	SINFRUG00000145924 (dre-miR-34-2b)		fru-mir-135-1b dre-mir-142-1a-as dre-mir-142-2a-as dre-mir-15-1b dre-mir-172 dre-mir-196-1c dre-mir-196-1b dre-mir-200a-1a dre-mir-34 dre-mir-34-2b dre-mir-34-3a		3' UGUUAGUCGA--UUGUUGUGACGGA 5' dre-mir-34-2b __ ..:|.|||||..|:.||||:||:|| __ 5' UGGACCAGCUCAAGGAACAUUGUCU 3' ENSDART00000002362 E:-21.34 S:108.000000 Loc:955 Cons: 88.00%(fru)	3' UGUUAGUCGAUUGUUGUGACGGA 5' dre-mir-34-2b __ .:::.||...|:.|||||||||| __ 5' CUGGACAUGAAGAAACACUGCCU 3' ENSDART00000002362 E:-20.549999 S:105.000000 Loc:1535 Cons: 100.00%(fru)
dre-mir-34-3a	ENSDART00000002362	ENSDARG00000015905	SINFRUG00000145924		ENSDARG00000015905 1699 (1699 nt) [LEUCINE ZIPPER TRANSCRIPTIONAL REGULATOR 1 LZTR 1; LEUCINE ZIPPER TRANSCRIPTIONAL REGULATOR 1 LZTR 1;] [BTB/POZ domain:BTB/POZ domain; Kelch repeat:Kelch repeat; BTB/POZ domain:BTB/POZ domain; Kelch repeat:Kelch repeat;]	2	41.89	213	SINFRUG00000145924 (dre-miR-34-3a)		fru-mir-135-1b dre-mir-142-1a-as dre-mir-142-2a-as dre-mir-15-1b dre-mir-172 dre-mir-196-1c dre-mir-196-1b dre-mir-200a-1a dre-mir-34 dre-mir-34-2b dre-mir-34-3a		3' UGUUAGUCGA--UUGUUGUGACGGA 5' dre-mir-34-3a __ ..:|.|||||..|:.||||:||:|| __ 5' UGGACCAGCUCAAGGAACAUUGUCU 3' ENSDART00000002362 E:-21.34 S:108.000000 Loc:955 Cons: 88.00%(fru)	3' UGUUAGUCGAUUGUUGUGACGGA 5' dre-mir-34-3a __ .:::.||...|:.|||||||||| __ 5' CUGGACAUGAAGAAACACUGCCU 3' ENSDART00000002362 E:-20.549999 S:105.000000 Loc:1535 Cons: 100.00%(fru)
fru-mir-93-1b	ENSDART00000016289_P	ENSDARG00000005250	SINFRUG00000151426		ENSDARG00000005250 4001 (4001 nt) [AMBIGUOUS;] []	2	40.32	213	SINFRUG00000151426 (fru-miR-93-1b)		fru-mir-22-1a dre-mir-22-1 fru-mir-93-1b		3' GAUGGACGUGUUUG-UCGUGAAAAC 5' fru-mir-93-1b __ :||.|..|.|||||.|||||||||| __ 5' UUAAC--CCCAAACAAGCACUUUUG 3' ENSDART00000016289_P E:-23.07 S:120.000000 Loc:2457 Cons: 73.91%(fru)	3' GAUG-GACGUGUUUGUCGUGAAAAC 5' fru-mir-93-1b __ :|||.:||:||||:|..:|:||||. __ 5' UUACAUUGUACAAGC--UAUUUUUU 3' ENSDART00000016289_P E:-17.25 S:93.000000 Loc:1157 Cons: 73.91%(fru)
dre-mir-26-1a	ENSDART00000017772_P	ENSDARG00000020987	SINFRUG00000121854		ENSDARG00000020987 320 (320 nt) [ALPHA ACTININ F ACTIN CROSS LINKING;] [Calponin-like actin-binding:Calponin-like actin-binding; Spectrin repeat:Spectrin repeat;]	2	35.55	212	SINFRUG00000121854 (fru-miR-26-1a)		fru-mir-26-1c dre-mir-26-1a dre-mir-26-1d		3' UCGGAUAGGAC-CUA-AU-GAACUU 5' dre-mir-26-1a __ ||.:|||:|||.|||.||.|||||| __ 5' AG-UUAUUCUGUGAUAUAUCUUGAA 3' ENSDART00000017772_P E:-18.360001 S:106.000000 Loc:99 Cons: 75.00%(fru)	3' UCGGAUAGGACCUAAUGAACUU 5' dre-mir-26-1a __ ||::|.|.||||||.||.|||| __ 5' AGUUUCU-CUGGAUGACAUGAA 3' ENSDART00000017772_P E:-17.190001 S:106.000000 Loc:133 Cons: 71.43%(fru)
dre-mir-205	ENSDART00000022546_P	ENSDARG00000010551	SINFRUG00000144941		ENSDARG00000010551 4001 (4001 nt) [REGULATOR OF G SIGNALING; REGULATOR OF G SIGNALING;] [Regulator of G protein:Regulator of G protein; PDZ/DHR/GLGF domain:PDZ/DHR/GLGF domain; Phosphotyrosine interaction domain:Phosphotyrosine interaction domain; G-alpha GTPase activator, LGN:G-alpha GTPase activator, LGN; Raf-like Ras-binding:Raf-like Ras-binding; Regulator of G protein:Regulator of G protein; …	2	49	212	SINFRUG00000144936 (dre-miR-205)		dre-mir-129-1 dre-mir-205 fru-mir-205-1a		3' GUCUGAGGCCACCUUACUUCCU 5' dre-mir-205 __ ||||||..||.|||:|||.||| __ 5' CAGACU--GGAGGAGUGACGGA 3' ENSDART00000022546_P E:-25.209999 S:115.000000 Loc:1784 Cons: 75.00%(fru)	3' GUCUGAGGCCACCUUACUUCCU 5' dre-mir-205 __ |||:|.|:||.||||..:|||| __ 5' CAGGCACUGGAGGAA--GAGGA 3' ENSDART00000022546_P E:-23.790001 S:97.000000 Loc:1810 Cons: 70.00%(fru)
fru-mir-205-1a	ENSDART00000022546_P	ENSDARG00000010551	SINFRUG00000144941		ENSDARG00000010551 4001 (4001 nt) [REGULATOR OF G SIGNALING; REGULATOR OF G SIGNALING;] [Regulator of G protein:Regulator of G protein; PDZ/DHR/GLGF domain:PDZ/DHR/GLGF domain; Phosphotyrosine interaction domain:Phosphotyrosine interaction domain; G-alpha GTPase activator, LGN:G-alpha GTPase activator, LGN; Raf-like Ras-binding:Raf-like Ras-binding; Regulator of G protein:Regulator of G protein; …	2	49	212	SINFRUG00000144936 (fru-miR-205-1a)		dre-mir-129-1 dre-mir-205 fru-mir-205-1a		3' GUCUGAGGCCACCUUACUUCCU 5' fru-mir-205-1a __ ||||||..||.|||:|||.||| __ 5' CAGACU--GGAGGAGUGACGGA 3' ENSDART00000022546_P E:-25.209999 S:115.000000 Loc:1784 Cons: 75.00%(fru)	3' GUCUGAGGCCACCUUACUUCCU 5' fru-mir-205-1a __ |||:|.|:||.||||..:|||| __ 5' CAGGCACUGGAGGAA--GAGGA 3' ENSDART00000022546_P E:-23.790001 S:97.000000 Loc:1810 Cons: 70.00%(fru)
fru-mir-106-b2	ENSDART00000026650_P	ENSDARG00000013237	SINFRUG00000155637		ENSDARG00000013237 4001 (4001 nt) [UNKNOWN;] []	2	40.13	212	SINFRUG00000155637 (fru-miR-106-b2)		fru-mir-106-b2 dre-mir-106-b1 dre-mir-133-1b dre-mir-133-1a fru-mir-17-1e dre-mir-17-1a dre-mir-17-1b dre-mir-17-1c dre-mir-20-1b dre-mir-20-1 fru-mir-93-1a		3' AUGGACGUGACAUUCGUGAAAU 5' fru-mir-106-b2 __ .||:|..||||||||:::|||. __ 5' CACUU--ACUGUAAGUGUUUUU 3' ENSDART00000026650_P E:-18.610001 S:109.000000 Loc:533 Cons: 75.00%(fru)	3' AUGGACGUGACAUU-CGUGAAAU 5' fru-mir-106-b2 __ |..|||:|||||||..:|:|||| __ 5' UCACUGUACUGUAACUUAUUUUA 3' ENSDART00000026650_P E:-21.52 S:103.000000 Loc:439 Cons: 78.26%(fru)
fru-mir-30c	ENSDART00000017690_P	ENSDARG00000018082	SINFRUG00000152834		ENSDARG00000018082 4001 (4001 nt) [AMBIGUOUS;] [Proline-rich extensin:Proline-rich extensin;]	2	40.53	212	SINFRUG00000152832 (fru-miR-30c)		dre-mir-140 dre-mir-15-3 fru-mir-30c		3' CGACUCUCACAUC-CUACAAAUGU 5' fru-mir-30c __ |:|||||||||.|.|.||||||.. __ 5' GUUGAGAGUGUCGUGCUGUUUAAC 3' ENSDART00000017690_P E:-23.25 S:107.000000 Loc:1819 Cons: 70.83%(fru)	3' CGACUCUCACA-UCCUACAAAUGU 5' fru-mir-30c __ .:|.||||.||.|||.|||||::| __ 5' UUUUAGAG-GUCAGGUUGUUUGUA 3' ENSDART00000017690_P E:-17.280001 S:105.000000 Loc:2004 Cons: 78.26%(fru)
dre-mir-135-3a	ENSDART00000022937	ENSDARG00000013502	SINFRUG00000121560		ENSDARG00000013502 937 (937 nt) [WILMS' TUMOR; WILMS' TUMOR;] [Wilm's tumour protein:Wilm's tumour protein; Zn-finger, C2H2 type:Zn-finger, C2H2 type; Wilm's tumour protein:Wilm's tumour protein; Zn-finger, C2H2 type:Zn-finger, C2H2 type;]	2	36.45	211	SINFRUG00000121560 (fru-miR-135-3a)		dre-mir-135-2a dre-mir-135-2b dre-mir-135-3a dre-mir-135-1a fru-mir-135-1b fru-mir-17-1e-as		3' AGUCUAUCCUUAUUUUUCGGUAU 5' dre-mir-135-3a __ .||.|.|||::..|||||||:|| __ 5' ACACACAGGGG--AAAAGCCGUA 3' ENSDART00000022937 E:-18.940001 S:110.000000 Loc:721 Cons: 80.95%(fru)	3' AGUCUAUCCUUAUUUUUCGGUAU 5' dre-mir-135-3a __ .||.|.|||..|:|:|||||:|. __ 5' ACACACAGG--UGAGAAGCCGUU 3' ENSDART00000022937 E:-17.51 S:101.000000 Loc:811 Cons: 76.19%(fru)
fru-mir-135-1b	ENSDART00000022937	ENSDARG00000013502	SINFRUG00000121560		ENSDARG00000013502 937 (937 nt) [WILMS' TUMOR; WILMS' TUMOR;] [Wilm's tumour protein:Wilm's tumour protein; Zn-finger, C2H2 type:Zn-finger, C2H2 type; Wilm's tumour protein:Wilm's tumour protein; Zn-finger, C2H2 type:Zn-finger, C2H2 type;]	2	44.25	211	SINFRUG00000121560 (fru-miR-135-1b)		dre-mir-135-2a dre-mir-135-2b dre-mir-135-3a dre-mir-135-1a fru-mir-135-1b fru-mir-17-1e-as		3' AGUGCAUCCUUAUUUUUCGGUAU 5' fru-mir-135-1b __ .|||..|||::..|||||||:|| __ 5' ACACACAGGGG--AAAAGCCGUA 3' ENSDART00000022937 E:-23.01 S:110.000000 Loc:721 Cons: 76.19%(fru)	3' AGUGCAUCCUUAUUUUUCGGUAU 5' fru-mir-135-1b __ .|||..|||..|:|:|||||:|. __ 5' ACACACAGG--UGAGAAGCCGUU 3' ENSDART00000022937 E:-21.24 S:101.000000 Loc:811 Cons: 71.43%(fru)
dre-mir-103-3a	ENSDART00000004158_P	ENSDARG00000008082	SINFRUG00000125422		ENSDARG00000008082 4001 (4001 nt) [BCL 2 RELATED OVARIAN KILLER;] [Apoptosis regulator Bcl-2 protein, BH:Apoptosis regulator Bcl-2 protein, BH;]	2	37.88	211	SINFRUG00000139360 (dre-miR-103-3a)		dre-mir-103-1a dre-mir-103-2a dre-mir-103-3a fru-mir-103-3 dre-mir-107-1b dre-mir-107-1a fru-mir-107-1		3' ACUAUCGGGACAUGUUACGACGA 5' dre-mir-103-3a __ .||||.:::||.|:||||:||.| __ 5' AGAUA-UUUUGAAUAAUGUUGGU 3' ENSDART00000004158_P E:-17.219999 S:107.000000 Loc:1355 Cons: 72.73%(fru)	3' ACUAUCGGGACAUGUUACGACGA 5' dre-mir-103-3a __ .||||.:::||||||:||:.|.| __ 5' AGAUAUUUUUGUACAGUGUAGAU 3' ENSDART00000004158_P E:-20.66 S:104.000000 Loc:882 Cons: 73.91%(fru)
fru-mir-103-3	ENSDART00000004158_P	ENSDARG00000008082	SINFRUG00000125422		ENSDARG00000008082 4001 (4001 nt) [BCL 2 RELATED OVARIAN KILLER;] [Apoptosis regulator Bcl-2 protein, BH:Apoptosis regulator Bcl-2 protein, BH;]	2	37.88	211	SINFRUG00000139360 (fru-miR-103-3)		dre-mir-103-1a dre-mir-103-2a dre-mir-103-3a fru-mir-103-3 dre-mir-107-1b dre-mir-107-1a fru-mir-107-1		3' ACUAUCGGGACAUGUUACGACGA 5' fru-mir-103-3 __ .||||.:::||.|:||||:||.| __ 5' AGAUA-UUUUGAAUAAUGUUGGU 3' ENSDART00000004158_P E:-17.219999 S:107.000000 Loc:1355 Cons: 72.73%(fru)	3' ACUAUCGGGACAUGUUACGACGA 5' fru-mir-103-3 __ .||||.:::||||||:||:.|.| __ 5' AGAUAUUUUUGUACAGUGUAGAU 3' ENSDART00000004158_P E:-20.66 S:104.000000 Loc:882 Cons: 73.91%(fru)
dre-mir-107-1a	ENSDART00000004158_P	ENSDARG00000008082	SINFRUG00000125422		ENSDARG00000008082 4001 (4001 nt) [BCL 2 RELATED OVARIAN KILLER;] [Apoptosis regulator Bcl-2 protein, BH:Apoptosis regulator Bcl-2 protein, BH;]	2	37.88	211	SINFRUG00000139360 (dre-miR-107-1a)		dre-mir-103-1a dre-mir-103-2a dre-mir-103-3a fru-mir-103-3 dre-mir-107-1b dre-mir-107-1a fru-mir-107-1		3' ACUAUCGGGACAUGUUACGACGA 5' dre-mir-107-1a __ .||||.:::||.|:||||:||.| __ 5' AGAUA-UUUUGAAUAAUGUUGGU 3' ENSDART00000004158_P E:-17.219999 S:107.000000 Loc:1355 Cons: 72.73%(fru)	3' ACUAUCGGGACAUGUUACGACGA 5' dre-mir-107-1a __ .||||.:::||||||:||:.|.| __ 5' AGAUAUUUUUGUACAGUGUAGAU 3' ENSDART00000004158_P E:-20.66 S:104.000000 Loc:882 Cons: 73.91%(fru)
fru-mir-107-1	ENSDART00000004158_P	ENSDARG00000008082	SINFRUG00000125422		ENSDARG00000008082 4001 (4001 nt) [BCL 2 RELATED OVARIAN KILLER;] [Apoptosis regulator Bcl-2 protein, BH:Apoptosis regulator Bcl-2 protein, BH;]	2	37.88	211	SINFRUG00000139360 (fru-miR-107-1)		dre-mir-103-1a dre-mir-103-2a dre-mir-103-3a fru-mir-103-3 dre-mir-107-1b dre-mir-107-1a fru-mir-107-1		3' ACUAUCGGGACAUGUUACGACGA 5' fru-mir-107-1 __ .||||.:::||.|:||||:||.| __ 5' AGAUA-UUUUGAAUAAUGUUGGU 3' ENSDART00000004158_P E:-17.219999 S:107.000000 Loc:1355 Cons: 72.73%(fru)	3' ACUAUCGGGACAUGUUACGACGA 5' fru-mir-107-1 __ .||||.:::||||||:||:.|.| __ 5' AGAUAUUUUUGUACAGUGUAGAU 3' ENSDART00000004158_P E:-20.66 S:104.000000 Loc:882 Cons: 73.91%(fru)
dre-mir-34	ENSDART00000024237	ENSDARG00000009179	SINFRUG00000152429		ENSDARG00000009179 1830 (1830 nt) [UNKNOWN;] [Zn-finger, FYVE type:Zn-finger, FYVE type;]	2	50.15	210	SINFRUG00000152429 (dre-miR-34)		dre-mir-138-2 dre-mir-27-3a dre-mir-34		3' UGUUG-GUCGAUUCUGUGACGGU 5' dre-mir-34 __ :||:|.|||..::||||||.||| __ 5' GCAGCGCAG--GGGACACUACCA 3' ENSDART00000024237 E:-23.16 S:106.000000 Loc:1082 Cons: 76.19%(fru)	3' UGUUGGUCGAUU--CU-GUGACGGU 5' dre-mir-34 __ :||:.|||||||..||.|||||||: __ 5' GCAG-CAGCUAAUUGACCACUGCCG 3' ENSDART00000024237 E:-26.99 S:104.000000 Loc:206 Cons: 70.83%(fru)
dre-mir-138-2	ENSDART00000009532_P	ENSDARG00000018157	SINFRUG00000138407		ENSDARG00000018157 4001 (4001 nt) [AMBIGUOUS;] []	2	37.96	210	SINFRUG00000138407 (dre-miR-138-2)		dre-mir-138-2 dre-mir-138-1 dre-mir-142-2a-as dre-mir-142-1a-as		3' GGGACUAAGUGUUGUGGUCGA 5' dre-mir-138-2 __ ..||.||.|:|||||.||||| __ 5' GGCUCAUACGCAACA-CAGCU 3' ENSDART00000009532_P E:-18.98 S:105.000000 Loc:520 Cons: 70.00%(fru)	3' GGGACUAAGUGUUGUGGUCGA 5' dre-mir-138-2 __ ..||.||.|:|||||.||||| __ 5' GGCUCAUACGCAACA-CAGCU 3' ENSDART00000009532_P E:-18.98 S:105.000000 Loc:1305 Cons: 70.00%(fru)
dre-mir-27-2a	ENSDART00000015924_P	ENSDARG00000004777	SINFRUG00000141606		ENSDARG00000004777 4001 (4001 nt) [KINASE; KINASE;] [Tyrosine protein kinase:Tyrosine protein kinase; Protein kinase:Protein kinase; Ubiquitin-associated domain:Ubiquitin-associated domain; Tyrosine protein kinase:Tyrosine protein kinase; Protein kinase:Protein kinase; Ubiquitin-associated domain:Ubiquitin-associated domain;]	2	44.65	210	SINFRUG00000141606 (fru-miR-27-2a)		dre-mir-27-2a		3' CGUCUUGAAUCGGUGACACUU 5' dre-mir-27-2a __ .||.|||||||.|||||||:| __ 5' CCACAACUUAG-CACUGUGGA 3' ENSDART00000015924_P E:-24.08 S:115.000000 Loc:917 Cons: 75.00%(fru)	3' CGUCUUGAAUCGGUGACACUU 5' dre-mir-27-2a __ .|||.:|.||.||||||||.. __ 5' ACAGUGC-UAACCACUGUGCC 3' ENSDART00000015924_P E:-20.57 S:95.000000 Loc:1086 Cons: 75.00%(fru)
dre-mir-93	ENSDART00000004081_P	ENSDARG00000001987	SINFRUG00000151591		CONNEXIN 55.5. [Source:RefSeq;Acc:NM_131812] ENSDARG00000001987 (1) (389330 389330 390826 390829 395271) 4001 (4001 nt) [GAP JUNCTION CONNEXIN;] [Connexins:Connexins;]	2	48.84	210	SINFRUG00000151591 (dre-miR-93)		dre-mir-1-2b dre-mir-1-2a dre-mir-1-2c dre-mir-93	GO:0005922->connexon complex GO:0016021->integral to membrane GO:0005921->gap junction GO:0015285-> GO:0007154->cell communication	3' GAUGGACGUGUUUGUCGUGAAA 5' dre-mir-93 __ :||||||..|..|||||||||. __ 5' UUACCUG--C--ACAGCACUUC 3' ENSDART00000004081_P E:-24.42 S:105.000000 Loc:2246 Cons: 77.78%(fru)	3' GAUGGACGUGUUUGUCGUGAAA 5' dre-mir-93 __ :||||||..|..|||||||||. __ 5' UUACCUG--C--ACAGCACUUC 3' ENSDART00000004081_P E:-24.42 S:105.000000 Loc:2484 Cons: 77.78%(fru)
dre-mir-17-1c	ENSDART00000013932_P	ENSDARG00000004702	SINFRUG00000139126		ENSDARG00000004702 4001 (4001 nt) [UNKNOWN; UNKNOWN;] []	2	41.63	210	SINFRUG00000139126 (fru-miR-17-1c)		dre-mir-106-b1 fru-mir-106-b2 dre-mir-106-a1 dre-mir-17-1a fru-mir-17-1e dre-mir-17-1b dre-mir-17-1d dre-mir-17-1c dre-mir-18-1 dre-mir-18-3b dre-mir-18-2b fru-mir-18-1a fru-mir-18-1b dre-mir-18-2 dre-mir-18-3a fru-mir-18-3 dre-mir-20-1b dre-mir-20-2a dre-mir-20-1 dre-mir-20-2b fru-mir-33-1b fru-mir-33-1a fru-mir-33b fru-mir-93-2a fru-mir-93-1a fru-mir-93-2b fru-mir-93-1b		3' UGAUGGACGUG-AUAUUCGUGAAAU 5' dre-mir-17-1c __ .|||.|||:||.|:||.||||||.. __ 5' UCUAGCUGUACUUGUAUGCACUUGU 3' ENSDART00000013932_P E:-23.25 S:112.000000 Loc:410 Cons: 92.00%(fru)	3' UGAUGGACG-UGAUAU--UCGUGAAAU 5' dre-mir-17-1c __ ||||..|||.|||.||..|||||||.: __ 5' ACUA-AUGCAACUCUACGAGCACUUGG 3' ENSDART00000013932_P E:-18.379999 S:98.000000 Loc:349 Cons: 88.46%(fru)
dre-mir-187	ENSDART00000015745_P	ENSDARG00000016604	SINFRUG00000155566		ENSDARG00000016604 4001 (4001 nt) [PRECURSOR; PRECURSOR;] [Fibrinogen, beta/gamma chain, C-terminal globular:Fibrinogen, beta/gamma chain, C-terminal globular; Fibrinogen, beta/gamma chain, C-terminal globular:Fibrinogen, beta/gamma chain, C-terminal globular;]	2	38.5	209	SINFRUG00000155566 (fru-miR-187)		dre-mir-187		3' GACCG-ACGUUGUGUUCUGUG--CU 5' dre-mir-187 __ :|.|:.||:||.|:|||||||..|| __ 5' UUAGUAUGUAAAAUAAGACACAGGA 3' ENSDART00000015745_P E:-18.9 S:106.000000 Loc:1444 Cons: 72.00%(fru)	3' GACCGACGUUGUG-UUCUGUGCU 5' dre-mir-187 __ ||||..|:|.:|:.||||||:|| __ 5' CUGG--GUAUUAUAAAGACAUGA 3' ENSDART00000015745_P E:-19.6 S:103.000000 Loc:895 Cons: 71.43%(fru)
dre-mir-181-1a	ENSDART00000005136	ENSDARG00000020281	SINFRUG00000149891		ENSDARG00000020281 1371 (1371 nt) [PRECURSOR; PRECURSOR; PRECURSOR; PRECURSOR; PRECURSOR;] [EGF-like domain:EGF-like domain; Matrix fibril-associated:Matrix fibril-associated; EGF-like domain:EGF-like domain; Matrix fibril-associated:Matrix fibril-associated; EGF-like domain:EGF-like domain; Matrix fibril-associated:Matrix fibril-associated; EGF-like domain:EGF-like domain; Matrix fibril-associat…	2	36.82	208	SINFRUG00000149891 (fru-miR-181-1a)		dre-mir-181-1a dre-mir-181-1d dre-mir-181-1b dre-mir-181-1c fru-mir-33-1a fru-mir-33-1b fru-mir-33b		3' UGA-GUGGCUGUCGCAACUUACAA 5' dre-mir-181-1a __ :||.:||.||:|.||.|||:|||. __ 5' GCUGUACAGAUAUCGAUGAGUGUG 3' ENSDART00000005136 E:-17.549999 S:105.000000 Loc:1237 Cons: 75.00%(fru)	3' UGAGUGGCUGUCGCAACUUACAA 5' dre-mir-181-1a __ ||.||..||:|.||.|||:|||. __ 5' ACACAGAGAUAUCGAUGAGUGUG 3' ENSDART00000005136 E:-19.27 S:103.000000 Loc:608 Cons: 78.26%(fru)
dre-mir-181-1d	ENSDART00000005136	ENSDARG00000020281	SINFRUG00000149891		ENSDARG00000020281 1371 (1371 nt) [PRECURSOR; PRECURSOR; PRECURSOR; PRECURSOR; PRECURSOR;] [EGF-like domain:EGF-like domain; Matrix fibril-associated:Matrix fibril-associated; EGF-like domain:EGF-like domain; Matrix fibril-associated:Matrix fibril-associated; EGF-like domain:EGF-like domain; Matrix fibril-associated:Matrix fibril-associated; EGF-like domain:EGF-like domain; Matrix fibril-associat…	2	36.82	208	SINFRUG00000149891 (fru-miR-181-1d)		dre-mir-181-1a dre-mir-181-1d dre-mir-181-1b dre-mir-181-1c fru-mir-33-1a fru-mir-33-1b fru-mir-33b		3' UGA-GUGGCUGUCGCAACUUACAA 5' dre-mir-181-1d __ :||.:||.||:|.||.|||:|||. __ 5' GCUGUACAGAUAUCGAUGAGUGUG 3' ENSDART00000005136 E:-17.549999 S:105.000000 Loc:1237 Cons: 75.00%(fru)	3' UGAGUGGCUGUCGCAACUUACAA 5' dre-mir-181-1d __ ||.||..||:|.||.|||:|||. __ 5' ACACAGAGAUAUCGAUGAGUGUG 3' ENSDART00000005136 E:-19.27 S:103.000000 Loc:608 Cons: 78.26%(fru)
dre-mir-181-1b	ENSDART00000005136	ENSDARG00000020281	SINFRUG00000149891		ENSDARG00000020281 1371 (1371 nt) [PRECURSOR; PRECURSOR; PRECURSOR; PRECURSOR; PRECURSOR;] [EGF-like domain:EGF-like domain; Matrix fibril-associated:Matrix fibril-associated; EGF-like domain:EGF-like domain; Matrix fibril-associated:Matrix fibril-associated; EGF-like domain:EGF-like domain; Matrix fibril-associated:Matrix fibril-associated; EGF-like domain:EGF-like domain; Matrix fibril-associat…	2	36.82	208	SINFRUG00000149891 (fru-miR-181-1b)		dre-mir-181-1a dre-mir-181-1d dre-mir-181-1b dre-mir-181-1c fru-mir-33-1a fru-mir-33-1b fru-mir-33b		3' UGA-GUGGCUGUCGCAACUUACAA 5' dre-mir-181-1b __ :||.:||.||:|.||.|||:|||. __ 5' GCUGUACAGAUAUCGAUGAGUGUG 3' ENSDART00000005136 E:-17.549999 S:105.000000 Loc:1237 Cons: 75.00%(fru)	3' UGAGUGGCUGUCGCAACUUACAA 5' dre-mir-181-1b __ ||.||..||:|.||.|||:|||. __ 5' ACACAGAGAUAUCGAUGAGUGUG 3' ENSDART00000005136 E:-19.27 S:103.000000 Loc:608 Cons: 78.26%(fru)
dre-mir-181-1c	ENSDART00000005136	ENSDARG00000020281	SINFRUG00000149891		ENSDARG00000020281 1371 (1371 nt) [PRECURSOR; PRECURSOR; PRECURSOR; PRECURSOR; PRECURSOR;] [EGF-like domain:EGF-like domain; Matrix fibril-associated:Matrix fibril-associated; EGF-like domain:EGF-like domain; Matrix fibril-associated:Matrix fibril-associated; EGF-like domain:EGF-like domain; Matrix fibril-associated:Matrix fibril-associated; EGF-like domain:EGF-like domain; Matrix fibril-associat…	2	36.82	208	SINFRUG00000149891 (fru-miR-181-1c)		dre-mir-181-1a dre-mir-181-1d dre-mir-181-1b dre-mir-181-1c fru-mir-33-1a fru-mir-33-1b fru-mir-33b		3' UGA-GUGGCUGUCGCAACUUACAA 5' dre-mir-181-1c __ :||.:||.||:|.||.|||:|||. __ 5' GCUGUACAGAUAUCGAUGAGUGUG 3' ENSDART00000005136 E:-17.549999 S:105.000000 Loc:1237 Cons: 75.00%(fru)	3' UGAGUGGCUGUCGCAACUUACAA 5' dre-mir-181-1c __ ||.||..||:|.||.|||:|||. __ 5' ACACAGAGAUAUCGAUGAGUGUG 3' ENSDART00000005136 E:-19.27 S:103.000000 Loc:608 Cons: 78.26%(fru)
dre-mir-15-3	ENSDART00000017295_P	ENSDARG00000009506	SINFRUG00000139446		ENSDARG00000009506 4001 (4001 nt) [METABOTROPIC GLUTAMATE RECEPTOR PRECURSOR;] [G-protein coupled receptors family 3 (Metabotropic glutamate receptor-like):G-protein coupled receptors family 3 (Metabotropic glutamate receptor-like); Metabotropic gamma-aminobutyric acid receptor, type B:Metabotropic gamma-aminobutyric acid receptor, type B;]	2	37.45	208	SINFRUG00000139446 (dre-miR-15-3)		dre-mir-15-3 fru-mir-304		3' ACUUUUGGUACUGCGCGACGAA 5' dre-mir-15-3 __ ..||.|.|||.||.|||||||| __ 5' AUAAUAACAUCACCCGCUGCUU 3' ENSDART00000017295_P E:-18.01 S:115.000000 Loc:2031 Cons: 72.73%(fru)	3' ACUUUUGGU-ACUGCGCGACGAA 5' dre-mir-15-3 __ |.|||||||.||||...|||||| __ 5' UCAAAACCAUUGAC--UCUGCUU 3' ENSDART00000017295_P E:-19.440001 S:93.000000 Loc:1440 Cons: 71.43%(fru)
dre-mir-31	ENSDART00000009592_P	ENSDARG00000011852	SINFRUG00000134314		ENSDARG00000011852 4001 (4001 nt) [GRIP ASSOCIATED 1;] []	2	38.9	208	SINFRUG00000134314 (dre-miR-31)		dre-mir-205 fru-mir-205-1a dre-mir-22-1 fru-mir-22-1a dre-mir-31		3' GUCGAUACGGUUGUAGAACGGU 5' dre-mir-31 __ |||||.||.|.||||:||.||| __ 5' CAGCUCUG-C-ACAUUUUUCCA 3' ENSDART00000009592_P E:-19.629999 S:109.000000 Loc:1931 Cons: 70.00%(fru)	3' GUCGAUACGGUUGUAGAACGGU 5' dre-mir-31 __ |||||.||.|.||||:||.||| __ 5' CAGCUCUG-C-ACAUUUU-CCA 3' ENSDART00000009592_P E:-19.27 S:99.000000 Loc:1659 Cons: 73.68%(fru)
dre-mir-17-1a	ENSDART00000026650_P	ENSDARG00000013237	SINFRUG00000155637		ENSDARG00000013237 4001 (4001 nt) [UNKNOWN;] []	2	36.78	208	SINFRUG00000155637 (fru-miR-17-1a)		fru-mir-106-b2 dre-mir-106-b1 dre-mir-133-1b dre-mir-133-1a fru-mir-17-1e dre-mir-17-1a dre-mir-17-1b dre-mir-17-1c dre-mir-20-1b dre-mir-20-1 fru-mir-93-1a		3' UGAUG-GACGUGACAUUCGUGAAAC 5' dre-mir-17-1a __ |:.:|.||.:||||||||:::|||. __ 5' AUAGCACU-UACUGUAAGUGUUUUU 3' ENSDART00000026650_P E:-17.76 S:109.000000 Loc:528 Cons: 70.83%(fru)	3' UGAUGGACGUGACAUU-CGUGAAAC 5' dre-mir-17-1a __ |:|..|||:|||||||..:|:|||. __ 5' AUUCACUGUACUGUAACUUAUUUUA 3' ENSDART00000026650_P E:-19.02 S:99.000000 Loc:434 Cons: 84.00%(fru)
dre-mir-17-1b	ENSDART00000026650_P	ENSDARG00000013237	SINFRUG00000155637		ENSDARG00000013237 4001 (4001 nt) [UNKNOWN;] []	2	36.78	208	SINFRUG00000155637 (fru-miR-17-1b)		fru-mir-106-b2 dre-mir-106-b1 dre-mir-133-1b dre-mir-133-1a fru-mir-17-1e dre-mir-17-1a dre-mir-17-1b dre-mir-17-1c dre-mir-20-1b dre-mir-20-1 fru-mir-93-1a		3' UGAUG-GACGUGACAUUCGUGAAAC 5' dre-mir-17-1b __ |:.:|.||.:||||||||:::|||. __ 5' AUAGCACU-UACUGUAAGUGUUUUU 3' ENSDART00000026650_P E:-17.76 S:109.000000 Loc:528 Cons: 70.83%(fru)	3' UGAUGGACGUGACAUU-CGUGAAAC 5' dre-mir-17-1b __ |:|..|||:|||||||..:|:|||. __ 5' AUUCACUGUACUGUAACUUAUUUUA 3' ENSDART00000026650_P E:-19.02 S:99.000000 Loc:434 Cons: 84.00%(fru)
dre-mir-139	ENSDART00000009181_P	ENSDARG00000016890	SINFRUG00000152155		ENSDARG00000016890 4001 (4001 nt) [MITOCHONDRIAL GLUTAMATE CARRIER SOLUTE CARRIER FAMILY 25 MEMBER;] [Mitochondrial carrier protein:Mitochondrial carrier protein; Adenine nucleotide translocator 1:Adenine nucleotide translocator 1; Mitochondrial substrate carrier:Mitochondrial substrate carrier;]	2	44.04	208	SINFRUG00000152155 (fru-miR-139)		dre-mir-139		3' UGAC-CUCUGUGU--ACGUGACAUCU 5' dre-mir-139 __ .|||.||..|.||..|||||||.||| __ 5' UCUGUGAUCCUCAUCUGCACUGAAGA 3' ENSDART00000009181_P E:-21.27 S:107.000000 Loc:1846 Cons: 73.08%(fru)	3' UGACCUCUGUGUACGUGACAUCU 5' dre-mir-139 __ .||.||||.|||.||:.|||||| __ 5' UCUAGAGAGACAGGCG-UGUAGA 3' ENSDART00000009181_P E:-22.77 S:101.000000 Loc:2484 Cons: 72.73%(fru)
dre-mir-17-1d	ENSDART00000028002_P	ENSDARG00000015746	SINFRUG00000121575		ENSDARG00000015746 4001 (4001 nt) [DUAL SPECIFICITY KINASE EC_2.7.1.-;] [Protein kinase:Protein kinase;]	2	35.58	208	SINFRUG00000121575 (fru-miR-17-1d)		dre-mir-17-1d fru-mir-17-1e dre-mir-20-2a dre-mir-20-2b dre-mir-22-1 fru-mir-22-1a dre-mir-31-2a		3' UGAUGGACGUGACACUCGUGA-AAC 5' dre-mir-17-1d __ ::||.|||::||.||||:|||.||. __ 5' GUUA-CUGUGCU-UGAGUACUGUUA 3' ENSDART00000028002_P E:-17.93 S:105.000000 Loc:1932 Cons: 73.91%(fru)	3' UGAUGGACGUGACACUCGUGAAAC 5' dre-mir-17-1d __ |:.|:|||.|||.||:|||.|||. __ 5' AUAAUCUG-ACU-UGGGCAGUUUA 3' ENSDART00000028002_P E:-17.65 S:103.000000 Loc:2775 Cons: 72.73%(fru)
dre-mir-17-1d	ENSDART00000021643_P	ENSDARG00000011115	SINFRUG00000120387		ENSDARG00000011115 4001 (4001 nt) [SINGLE STRANDED DNA BINDING MSSP 1 RNA BINDING MOTIF SINGLE STRANDED INTERACTING 1; SINGLE STRANDED DNA BINDING MSSP 1 RNA BINDING MOTIF SINGLE STRANDED INTERACTING 1;] []	2	39.96	208	SINFRUG00000120387 (fru-miR-17-1d)		dre-mir-17-1d fru-mir-17-1e dre-mir-17-1b dre-mir-20-2b dre-mir-20-2a fru-mir-93-1a fru-mir-93-2b		3' UGAUGGACGUGACACUCGUGAAAC 5' dre-mir-17-1d __ ..|::.|.||:||||||.|:|||. __ 5' UGUGUAUACAUUGUGAGGAUUUUC 3' ENSDART00000021643_P E:-18.889999 S:108.000000 Loc:2160 Cons: 75.00%(fru)	3' UGAUGGACGUGACACUCGUGAAAC 5' dre-mir-17-1d __ ..|:::||.::||||||.|.|||| __ 5' UGUGUUUGGGUUGUGAGGA-UUUG 3' ENSDART00000021643_P E:-21.07 S:100.000000 Loc:1170 Cons: 78.26%(fru)
dre-mir-20-2b	ENSDART00000021643_P	ENSDARG00000011115	SINFRUG00000120387		ENSDARG00000011115 4001 (4001 nt) [SINGLE STRANDED DNA BINDING MSSP 1 RNA BINDING MOTIF SINGLE STRANDED INTERACTING 1; SINGLE STRANDED DNA BINDING MSSP 1 RNA BINDING MOTIF SINGLE STRANDED INTERACTING 1;] []	2	39.96	208	SINFRUG00000120387 (dre-miR-20-2b)		dre-mir-17-1d fru-mir-17-1e dre-mir-17-1b dre-mir-20-2b dre-mir-20-2a fru-mir-93-1a fru-mir-93-2b		3' GAUGGACGUGACACUCGUGAAAC 5' dre-mir-20-2b __ .|::.|.||:||||||.|:|||. __ 5' GUGUAUACAUUGUGAGGAUUUUC 3' ENSDART00000021643_P E:-18.889999 S:108.000000 Loc:2160 Cons: 73.91%(fru)	3' GAUGGACGUGACACUCGUGAAAC 5' dre-mir-20-2b __ .|:::||.::||||||.|.|||| __ 5' GUGUUUGGGUUGUGAGGA-UUUG 3' ENSDART00000021643_P E:-21.07 S:100.000000 Loc:1170 Cons: 77.27%(fru)
dre-mir-20-2a	ENSDART00000021643_P	ENSDARG00000011115	SINFRUG00000120387		ENSDARG00000011115 4001 (4001 nt) [SINGLE STRANDED DNA BINDING MSSP 1 RNA BINDING MOTIF SINGLE STRANDED INTERACTING 1; SINGLE STRANDED DNA BINDING MSSP 1 RNA BINDING MOTIF SINGLE STRANDED INTERACTING 1;] []	2	39.96	208	SINFRUG00000120387 (dre-miR-20-2a)		dre-mir-17-1d fru-mir-17-1e dre-mir-17-1b dre-mir-20-2b dre-mir-20-2a fru-mir-93-1a fru-mir-93-2b		3' GAUGGACGUGACACUCGUGAAAC 5' dre-mir-20-2a __ .|::.|.||:||||||.|:|||. __ 5' GUGUAUACAUUGUGAGGAUUUUC 3' ENSDART00000021643_P E:-18.889999 S:108.000000 Loc:2160 Cons: 73.91%(fru)	3' GAUGGACGUGACACUCGUGAAAC 5' dre-mir-20-2a __ .|:::||.::||||||.|.|||| __ 5' GUGUUUGGGUUGUGAGGA-UUUG 3' ENSDART00000021643_P E:-21.07 S:100.000000 Loc:1170 Cons: 77.27%(fru)
fru-mir-33-1b	ENSDART00000012440_P	ENSDARG00000019359	SINFRUG00000154878		SNAIL HOMOLOG 1A; SNAIL1. [Source:RefSeq;Acc:NM_131066] ENSDARG00000019359 (1) (215152 215152 219408 219408 273531) 4001 (4001 nt) [SNAIL HOMOLOG;] [Zn-finger, C2H2 subtype:Zn-finger, C2H2 subtype; Zn-finger, C2H2 type:Zn-finger, C2H2 type;]	2	42.38	208	SINFRUG00000154878 (fru-miR-33-1b)		dre-mir-199-1c dre-mir-199-1b dre-mir-199-1a fru-mir-33-1b fru-mir-33b fru-mir-33-1a	GO:0003936->hydrogen-transporting two-sector ATPase activity GO:0005524->ATP binding GO:0006818->hydrogen transport	3' GUUACGUUGAUGUUACGUGGU 5' fru-mir-33-1b __ ||..|:|||||.|||||||:| __ 5' CAUAGUAACUA-AAUGCACUA 3' ENSDART00000012440_P E:-19.82 S:109.000000 Loc:1481 Cons: 70.00%(fru)	3' GUUAC-GUUGAUGUUACGUGGU 5' fru-mir-33-1b __ ||:.|.|||||:|.|||||||. __ 5' CAGGGACAACUGC-AUGCACCU 3' ENSDART00000012440_P E:-22.559999 S:99.000000 Loc:2071 Cons: 71.43%(fru)
fru-mir-33b	ENSDART00000012440_P	ENSDARG00000019359	SINFRUG00000154878		SNAIL HOMOLOG 1A; SNAIL1. [Source:RefSeq;Acc:NM_131066] ENSDARG00000019359 (1) (215152 215152 219408 219408 273531) 4001 (4001 nt) [SNAIL HOMOLOG;] [Zn-finger, C2H2 subtype:Zn-finger, C2H2 subtype; Zn-finger, C2H2 type:Zn-finger, C2H2 type;]	2	42.38	208	SINFRUG00000154878 (fru-miR-33b)		dre-mir-199-1c dre-mir-199-1b dre-mir-199-1a fru-mir-33-1b fru-mir-33b fru-mir-33-1a	GO:0003936->hydrogen-transporting two-sector ATPase activity GO:0005524->ATP binding GO:0006818->hydrogen transport	3' GUUACGUUGAUGUUACGUGGU 5' fru-mir-33b __ ||..|:|||||.|||||||:| __ 5' CAUAGUAACUA-AAUGCACUA 3' ENSDART00000012440_P E:-19.82 S:109.000000 Loc:1481 Cons: 70.00%(fru)	3' GUUAC-GUUGAUGUUACGUGGU 5' fru-mir-33b __ ||:.|.|||||:|.|||||||. __ 5' CAGGGACAACUGC-AUGCACCU 3' ENSDART00000012440_P E:-22.559999 S:99.000000 Loc:2071 Cons: 71.43%(fru)
fru-mir-33-1a	ENSDART00000012440_P	ENSDARG00000019359	SINFRUG00000154878		SNAIL HOMOLOG 1A; SNAIL1. [Source:RefSeq;Acc:NM_131066] ENSDARG00000019359 (1) (215152 215152 219408 219408 273531) 4001 (4001 nt) [SNAIL HOMOLOG;] [Zn-finger, C2H2 subtype:Zn-finger, C2H2 subtype; Zn-finger, C2H2 type:Zn-finger, C2H2 type;]	2	42.38	208	SINFRUG00000154878 (fru-miR-33-1a)		dre-mir-199-1c dre-mir-199-1b dre-mir-199-1a fru-mir-33-1b fru-mir-33b fru-mir-33-1a	GO:0003936->hydrogen-transporting two-sector ATPase activity GO:0005524->ATP binding GO:0006818->hydrogen transport	3' GUUACGUUGAUGUUACGUGGU 5' fru-mir-33-1a __ ||..|:|||||.|||||||:| __ 5' CAUAGUAACUA-AAUGCACUA 3' ENSDART00000012440_P E:-19.82 S:109.000000 Loc:1481 Cons: 70.00%(fru)	3' GUUAC-GUUGAUGUUACGUGGU 5' fru-mir-33-1a __ ||:.|.|||||:|.|||||||. __ 5' CAGGGACAACUGC-AUGCACCU 3' ENSDART00000012440_P E:-22.559999 S:99.000000 Loc:2071 Cons: 71.43%(fru)
dre-mir-15-1b	ENSDART00000017383_P	ENSDARG00000019063	SINFRUG00000150889		ENSDARG00000019063 4001 (4001 nt) [PRECURSOR; PRECURSOR; PRECURSOR;] [Cadherin:Cadherin; Cadherin:Cadherin; Cadherin:Cadherin;]	2	41.5	208	SINFRUG00000150889 (dre-miR-15-1b)		dre-mir-15-1b dre-mir-15-1a dre-mir-30e-2 dre-mir-30e-1		3' GUGUU-UGGUAAGACACGACGAU 5' dre-mir-15-1b __ .||||.||||.|||||.:||||| __ 5' AACAAGACCA-UCUGU-UUGCUA 3' ENSDART00000017383_P E:-21.780001 S:107.000000 Loc:1410 Cons: 71.43%(fru)	3' GUGUUUG-GUAAGACACGACGAU 5' dre-mir-15-1b __ .:|||||.|.|||||||..|||| __ 5' AGCAAACACUUUCUGUG--GCUA 3' ENSDART00000017383_P E:-19.719999 S:101.000000 Loc:573 Cons: 71.43%(fru)
dre-mir-34-2b	ENSDART00000018035_P	ENSDARG00000009458	SINFRUG00000127652		ENSDARG00000009458 4001 (4001 nt) [PRE SPLICING FACTOR PRP17 CELL DIVISION CYCLE 40 HOMOLOG;] []	2	39.18	207	SINFRUG00000127652 (dre-miR-34-2b)		dre-mir-34-2b dre-mir-34-3a		3' UGUUAGUCGAUUGUUGUGACGGA 5' dre-mir-34-2b __ ||.||:|..|||||:|||||.:| __ 5' AC-AUUA--UAACAGCACUGAUU 3' ENSDART00000018035_P E:-17.68 S:106.000000 Loc:1326 Cons: 70.00%(fru)	3' UGUUAGUCGAUUGUUGUGACGGA 5' dre-mir-34-2b __ .|:.||.|||.||.|||||||:| __ 5' CCGCUC-GCUUAC-ACACUGCUU 3' ENSDART00000018035_P E:-21.5 S:101.000000 Loc:2247 Cons: 71.43%(fru)
dre-mir-34-3a	ENSDART00000018035_P	ENSDARG00000009458	SINFRUG00000127652		ENSDARG00000009458 4001 (4001 nt) [PRE SPLICING FACTOR PRP17 CELL DIVISION CYCLE 40 HOMOLOG;] []	2	39.18	207	SINFRUG00000127652 (dre-miR-34-3a)		dre-mir-34-2b dre-mir-34-3a		3' UGUUAGUCGAUUGUUGUGACGGA 5' dre-mir-34-3a __ ||.||:|..|||||:|||||.:| __ 5' AC-AUUA--UAACAGCACUGAUU 3' ENSDART00000018035_P E:-17.68 S:106.000000 Loc:1326 Cons: 70.00%(fru)	3' UGUUAGUCGAUUGUUGUGACGGA 5' dre-mir-34-3a __ .|:.||.|||.||.|||||||:| __ 5' CCGCUC-GCUUAC-ACACUGCUU 3' ENSDART00000018035_P E:-21.5 S:101.000000 Loc:2247 Cons: 71.43%(fru)
dre-mir-139	ENSDART00000014524_P	ENSDARG00000020081	SINFRUG00000128424		ENSDARG00000020081 4001 (4001 nt) [RECEPTOR PRECURSOR; RECEPTOR PRECURSOR;] [G-protein coupled receptors family 2 (secretin-like):G-protein coupled receptors family 2 (secretin-like); Vasoactive intestinal peptide, receptor 1:Vasoactive intestinal peptide, receptor 1; Adenylate cyclase-activating type 1 receptor, pituitary:Adenylate cyclase-activating type 1 receptor, pituitary; Hormone receptor,…	2	47.5	207	SINFRUG00000128424 (fru-miR-139)		dre-mir-139		3' UGACCUCUGUGUACGUGACAUCU 5' dre-mir-139 __ .||||||.|||.|.|||||||.| __ 5' UCUGGAG-CAC-UACACUGUAAA 3' ENSDART00000014524_P E:-24.219999 S:107.000000 Loc:2057 Cons: 71.43%(fru)	3' UGACCUCUGUGUACGU-GACAUCU 5' dre-mir-139 __ .:|.||||||||||.|.:||.||| __ 5' UUUUGAGACACAUGAAUUUGCAGA 3' ENSDART00000014524_P E:-23.280001 S:100.000000 Loc:1911 Cons: 70.83%(fru)
dre-mir-31	ENSDART00000015170_P	ENSDARG00000004939	SINFRUG00000139402		ENSDARG00000004939 4001 (4001 nt) [LYRIC;] []	2	35.79	206	SINFRUG00000139402 (dre-miR-31)		dre-mir-31		3' GUC-GAUACGGUUGUAGAACGGU 5' dre-mir-31 __ :||.|.||..:|:|||:||||:| __ 5' UAGACCAU--UAGCAUUUUGCUA 3' ENSDART00000015170_P E:-17.41 S:105.000000 Loc:896 Cons: 71.43%(fru)	3' GUC-GAUACGGUUGUAGAACGGU 5' dre-mir-31 __ :||.|.||..:|:||||||||:. __ 5' UAGACCAU--UAGCAUCUUGCUC 3' ENSDART00000015170_P E:-18.379999 S:101.000000 Loc:547 Cons: 71.43%(fru)
dre-mir-139	ENSDART00000022311_P	ENSDARG00000021449	SINFRUG00000154473		ENSDARG00000021449 4001 (4001 nt) [DEHYDROGENASE;] [Glucose/ribitol dehydrogenase:Glucose/ribitol dehydrogenase; Short-chain dehydrogenase/reductase SDR:Short-chain dehydrogenase/reductase SDR;]	2	38.89	206	SINFRUG00000154473 (fru-miR-139)		fru-mir-106-b2 dre-mir-106-a1 dre-mir-139 dre-mir-16-1 dre-mir-17-1a fru-mir-17-1e dre-mir-17-1c dre-mir-31-2a fru-mir-93-2b dre-mir-let7l-a dre-mir-let7l-b1 dre-mir-let7l-c1 fru-mir-let7l-c2 dre-mir-let7l-d1 fru-mir-let7l-d2		3' UGACCUCUGUGUACGUGACAUCU 5' dre-mir-139 __ ..||.:.|.||||||||||||.. __ 5' UGUGUGUAGACAUGCACUGUAUU 3' ENSDART00000022311_P E:-19.690001 S:113.000000 Loc:414 Cons: 73.91%(fru)	3' UGACCUCUGUGUACGUGACAUCU 5' dre-mir-139 __ |||||.|.|||.||||:|.|:|. __ 5' ACUGGUG-CACUUGCAUU-UGGC 3' ENSDART00000022311_P E:-19.200001 S:93.000000 Loc:105 Cons: 85.71%(fru)
fru-mir-33-1a	ENSDART00000026055_P	ENSDARG00000015436	SINFRUG00000139135		ENSDARG00000015436 4001 (4001 nt) [AMINE OXIDASE [FLAVIN CONTAINING] EC_1.4.3.4 MONOAMINE OXIDASE MAO;] [Amine oxidase:Amine oxidase;]	2	39.87	206	SINFRUG00000139135 (fru-miR-33-1a)		fru-mir-33-1a fru-mir-33-1b fru-mir-33b		3' GUUACGUUGAUGUUACGUGGU 5' fru-mir-33-1a __ ||:||.||..:||:||:|||| __ 5' CAGUG-AA--GCAGUGUACCA 3' ENSDART00000026055_P E:-19.93 S:106.000000 Loc:2072 Cons: 72.22%(fru)	3' GUUACGUUGAUGU-UAC-GUGGU 5' fru-mir-33-1a __ :||||.|||||||.|||.||:|: __ 5' UAAUG-AACUACAGAUGCCAUCG 3' ENSDART00000026055_P E:-19.940001 S:100.000000 Loc:1900 Cons: 72.73%(fru)
fru-mir-33-1b	ENSDART00000026055_P	ENSDARG00000015436	SINFRUG00000139135		ENSDARG00000015436 4001 (4001 nt) [AMINE OXIDASE [FLAVIN CONTAINING] EC_1.4.3.4 MONOAMINE OXIDASE MAO;] [Amine oxidase:Amine oxidase;]	2	39.87	206	SINFRUG00000139135 (fru-miR-33-1b)		fru-mir-33-1a fru-mir-33-1b fru-mir-33b		3' GUUACGUUGAUGUUACGUGGU 5' fru-mir-33-1b __ ||:||.||..:||:||:|||| __ 5' CAGUG-AA--GCAGUGUACCA 3' ENSDART00000026055_P E:-19.93 S:106.000000 Loc:2072 Cons: 72.22%(fru)	3' GUUACGUUGAUGU-UAC-GUGGU 5' fru-mir-33-1b __ :||||.|||||||.|||.||:|: __ 5' UAAUG-AACUACAGAUGCCAUCG 3' ENSDART00000026055_P E:-19.940001 S:100.000000 Loc:1900 Cons: 72.73%(fru)
fru-mir-33b	ENSDART00000026055_P	ENSDARG00000015436	SINFRUG00000139135		ENSDARG00000015436 4001 (4001 nt) [AMINE OXIDASE [FLAVIN CONTAINING] EC_1.4.3.4 MONOAMINE OXIDASE MAO;] [Amine oxidase:Amine oxidase;]	2	39.87	206	SINFRUG00000139135 (fru-miR-33b)		fru-mir-33-1a fru-mir-33-1b fru-mir-33b		3' GUUACGUUGAUGUUACGUGGU 5' fru-mir-33b __ ||:||.||..:||:||:|||| __ 5' CAGUG-AA--GCAGUGUACCA 3' ENSDART00000026055_P E:-19.93 S:106.000000 Loc:2072 Cons: 72.22%(fru)	3' GUUACGUUGAUGU-UAC-GUGGU 5' fru-mir-33b __ :||||.|||||||.|||.||:|: __ 5' UAAUG-AACUACAGAUGCCAUCG 3' ENSDART00000026055_P E:-19.940001 S:100.000000 Loc:1900 Cons: 72.73%(fru)
fru-mir-93-1a	ENSDART00000021643_P	ENSDARG00000011115	SINFRUG00000120387		ENSDARG00000011115 4001 (4001 nt) [SINGLE STRANDED DNA BINDING MSSP 1 RNA BINDING MOTIF SINGLE STRANDED INTERACTING 1; SINGLE STRANDED DNA BINDING MSSP 1 RNA BINDING MOTIF SINGLE STRANDED INTERACTING 1;] []	2	35.09	206	SINFRUG00000120387 (fru-miR-93-1a)		dre-mir-17-1d fru-mir-17-1e dre-mir-17-1b dre-mir-20-2b dre-mir-20-2a fru-mir-93-1a fru-mir-93-2b		3' GAUGGACGUGACAUUCGUGAAA 5' fru-mir-93-1a __ .|::.|.||:|||:||.|:||| __ 5' GUGUAUACAUUGUGAGGAUUUU 3' ENSDART00000021643_P E:-17.02 S:107.000000 Loc:2160 Cons: 77.27%(fru)	3' GAUGGACGUGACAUUCGUGAAA 5' fru-mir-93-1a __ .|:::||.::|||:||.|:||. __ 5' GUGUUUGGGUUGUGAGGAUUUG 3' ENSDART00000021643_P E:-18.07 S:99.000000 Loc:1170 Cons: 72.73%(fru)
dre-mir-98-1a	ENSDART00000011942_P	ENSDARG00000012785	SINFRUG00000131940		EMPTY SPIRACLES HOMEOBOX 2. [Source:RefSeq;Acc:NM_131280] ENSDARG00000012785 (1) (5848 5848 9574 9574 66095) 4001 (4001 nt) [HOMEOBOX;] [Homeobox:Homeobox; Helix-turn-helix motif, lambda-like repressor:Helix-turn-helix motif, lambda-like repressor;]	2	39.77	204	SINFRUG00000131940 (fru-miR-98-1a)		dre-mir-138-2 dre-mir-138-1 dre-mir-142-2a-as dre-mir-142-1a-as dre-mir-153-1b dre-mir-172 dre-mir-22-1 fru-mir-22-1a dre-mir-25 dre-mir-31 dre-mir-34 dre-mir-98-3a dre-mir-98-3b dre-mir-98-2a dre-mir-98-1a dre-mir-let7l-a dre-mir-let7l-a1 dre-mir-let7l-a2 dre-mir-let7l-b1 dre-mir-let7l-c1 fru-mir-let7l-c2 dre-mir-let7l-d1 fru-mir-let7l-d2	GO:0003700->transcription factor activity GO:0005634->nucleus GO:0005634->nucleus GO:0003677->DNA binding GO:0006355->regulation of transcription, DNA-dependent	3' UUGUUGUGUU-GAAUGAUGGAGU 5' dre-mir-98-1a __ ..:|::||||.||.||||||||. __ 5' UUUAGUACAAUCUGACUACCUCU 3' ENSDART00000011942_P E:-21.870001 S:112.000000 Loc:1625 Cons: 91.30%(fru)	3' UUGUUGUGUUGAA-UGAUGGAGU 5' dre-mir-98-1a __ :||..||||||||.|:|||:.|. __ 5' GACUCCACAACUUCAUUACUCCU 3' ENSDART00000011942_P E:-17.9 S:92.000000 Loc:2225 Cons: 95.65%(fru)
dre-mir-15-2a	ENSDART00000023390_P	ENSDARG00000020863	SINFRUG00000152496		ENSDARG00000020863 3049 (3049 nt) [ZINC FINGER 147 TRIPARTITE MOTIF 25 ESTROGEN RESPONSIVE FINGER EFP;] [Zn-finger, RING:Zn-finger, RING; Zn-finger, B-box:Zn-finger, B-box;]	2	41.74	204	SINFRUG00000152496 (fru-miR-15-2a)		dre-mir-143-1a dre-mir-15-2a		3' AUGUUUGGUACUACACGACGAU 5' dre-mir-15-2a __ .|||:|.::|||||||||.||: __ 5' AACAGA-UGUGAUGUGCU-CUG 3' ENSDART00000023390_P E:-21.07 S:106.000000 Loc:1911 Cons: 75.00%(fru)	3' AUGUUUGGUACUACACGACGAU 5' dre-mir-15-2a __ .|||:|.::.||||||||.||: __ 5' AACAGA-UGGGAUGUGCU-CUG 3' ENSDART00000023390_P E:-20.67 S:98.000000 Loc:1548 Cons: 80.00%(fru)
dre-mir-25	ENSDART00000014410_P	ENSDARG00000007238	SINFRUG00000128232		ENSDARG00000007238 4001 (4001 nt) [NEUTRAL SPHINGOMYELINASE II EC_3.1.4.12;] []	2	44.55	204	SINFRUG00000128232 (fru-miR-25)		dre-mir-25		3' AGUCUGGCUCUGUUCACGUUAC 5' dre-mir-25 __ .||||.:|||:||||.|::||. __ 5' ACAGA-UGAGGCAAGGGUGAUU 3' ENSDART00000014410_P E:-21.42 S:103.000000 Loc:122 Cons: 71.43%(fru)	3' AGUCUGGC-UCUGUUCACGUUAC 5' dre-mir-25 __ ||.|||:|.|.|||:||||.||| __ 5' UC-GACUGAAAACAGGUGC-AUG 3' ENSDART00000014410_P E:-23.129999 S:101.000000 Loc:226 Cons: 71.43%(fru)
dre-mir-24-1	ENSDART00000025600_P	ENSDARG00000008843	SINFRUG00000135863		ENSDARG00000008843 4001 (4001 nt) [UNKNOWN;] []	2	41.67	204	SINFRUG00000135863 (fru-miR-24-1)		dre-mir-24-1 dre-mir-93		3' GACAAGGACG---ACUUGACUCGGU 5' dre-mir-24-1 __ |||..|||||...||||||.||||. __ 5' CUG-CCCUGCUAGUGAACUCAGCCU 3' ENSDART00000025600_P E:-23.84 S:106.000000 Loc:1274 Cons: 70.83%(fru)	3' GACAAGGACGACUUGACUCGGU 5' dre-mir-24-1 __ |||...|||.|||||||.||.| __ 5' CUG---CUGAUGAACUGUGCAA 3' ENSDART00000025600_P E:-17.83 S:98.000000 Loc:761 Cons: 73.68%(fru)
fru-mir-29-1c	ENSDART00000014583_P	ENSDARG00000004790	SINFRUG00000153450		ENSDARG00000004790 4001 (4001 nt) [AMBIGUOUS;] []	2	39.69	204	SINFRUG00000153450 (fru-miR-29-1c)		fru-mir-29-3a fru-mir-29-1c dre-mir-29-1a		3' CAUUGGCUAAAGUUUACCACGAUC 5' fru-mir-29-1c __ ||.|:|.||||.||:|||||.||| __ 5' GU-AUC-AUUUAAAGUGGUG-UAG 3' ENSDART00000014583_P E:-17.1 S:106.000000 Loc:1046 Cons: 76.19%(fru)	3' CAUUGGCUAAAGUUUACCACGAUC 5' fru-mir-29-1c __ |||||:|.||||.|.||||.||:| __ 5' GUAACUG-UUUC-AUUGGU-CUGG 3' ENSDART00000014583_P E:-22.59 S:98.000000 Loc:1085 Cons: 71.43%(fru)
dre-mir-29-1a	ENSDART00000014583_P	ENSDARG00000004790	SINFRUG00000153450		ENSDARG00000004790 4001 (4001 nt) [AMBIGUOUS;] []	2	39.69	204	SINFRUG00000153450 (fru-miR-29-1a)		fru-mir-29-3a fru-mir-29-1c dre-mir-29-1a		3' CAUUGGCUAAAGUUUACCACGAUC 5' dre-mir-29-1a __ ||.|:|.||||.||:|||||.||| __ 5' GU-AUC-AUUUAAAGUGGUG-UAG 3' ENSDART00000014583_P E:-17.1 S:106.000000 Loc:1046 Cons: 76.19%(fru)	3' CAUUGGCUAAAGUUUACCACGAUC 5' dre-mir-29-1a __ |||||:|.||||.|.||||.||:| __ 5' GUAACUG-UUUC-AUUGGU-CUGG 3' ENSDART00000014583_P E:-22.59 S:98.000000 Loc:1085 Cons: 71.43%(fru)
dre-mir-34	ENSDART00000007873	ENSDARG00000016314	SINFRUG00000132295		ENSDARG00000016314 703 (703 nt) [KINASE;] [Tyrosine protein kinase:Tyrosine protein kinase; Protein kinase:Protein kinase;]	2	48.28	203	SINFRUG00000132295 (dre-miR-34)		fru-mir-103-3 dre-mir-103-3b dre-mir-103-3a fru-mir-107-1 dre-mir-107-2 dre-mir-107-1a dre-mir-172 dre-mir-34		3' UGUUGGUCGAUUCUGUGACG-GU 5' dre-mir-34 __ :|.:||.||.:||||:||||.|| __ 5' GCUGCCUGC-GAGACGCUGCACA 3' ENSDART00000007873 E:-25.030001 S:105.000000 Loc:270 Cons: 77.27%(fru)	3' UGUUGGUCGAUUCUGUGA-CGGU 5' dre-mir-34 __ :||:||.|||||.|||.|.|||| __ 5' GCAGCC-GCUAACACAAUAGCCA 3' ENSDART00000007873 E:-23.25 S:98.000000 Loc:541 Cons: 72.73%(fru)
fru-mir-106-b2	ENSDART00000018107_P	ENSDARG00000019250	SINFRUG00000125256		ENSDARG00000019250 4001 (4001 nt) [FANCONI ANEMIA GROUP F FACF;] []	2	38.76	203	SINFRUG00000125256 (fru-miR-106-b2)		dre-mir-106-b1 fru-mir-106-b2 dre-mir-93		3' AUGGACGUGACAU-UCGUGAAAU 5' fru-mir-106-b2 __ .|.|.|||||.|:.||||||||| __ 5' AAACAGCACU-UGCAGCACUUUA 3' ENSDART00000018107_P E:-19.9 S:109.000000 Loc:1228 Cons: 72.73%(fru)	3' AUGGACG-UGACAUUCGUGA----AAU 5' fru-mir-106-b2 __ .|.:|||.|:||||||||.|....||| __ 5' AAAUUGCAAUUGUAAGCAAUGCAUUUA 3' ENSDART00000018107_P E:-18.860001 S:94.000000 Loc:1147 Cons: 70.37%(fru)
dre-mir-141-1a	ENSDART00000021318_P	ENSDARG00000017022	SINFRUG00000150209		ENSDARG00000017022 4001 (4001 nt) [ETS; ETS;] [Ets-domain:Ets-domain; Ets-domain:Ets-domain;]	2	35	202	SINFRUG00000150209 (fru-miR-141-1a)		dre-mir-133-1b dre-mir-133-1a dre-mir-141-1a dre-mir-141-1b		3' CGUAGCAAUGGUCUGUCACAA 5' dre-mir-141-1a __ |||||..||.||||||.|||| __ 5' GCAUC--UA-CAGACAAUGUU 3' ENSDART00000021318_P E:-17.110001 S:111.000000 Loc:1642 Cons: 77.78%(fru)	3' CGUAGCAAUGG-UC-UGUCACAA 5' dre-mir-141-1a __ .|||:|.||||.||.|||||.|| __ 5' UCAUUG-UACCAAGCACAGUAUU 3' ENSDART00000021318_P E:-17.889999 S:91.000000 Loc:879 Cons: 72.73%(fru)
dre-mir-30e-1	ENSDART00000011294	ENSDARG00000017438	SINFRUG00000145743		ENSDARG00000017438 1249 (1249 nt) [DEDICATOR OF CYTOKINESIS; DEDICATOR OF CYTOKINESIS; DEDICATOR OF CYTOKINESIS;] []	2	39.35	202	SINFRUG00000145743 (fru-miR-30e-1)		dre-mir-30e-1 dre-mir-30e-2		3' AGGUCAGUUCCUA---CAAAUGU 5' dre-mir-30e-1 __ |||||.|:|||||...||||:|. __ 5' UCCAGACGAGGAUGGGGUUUGCU 3' ENSDART00000011294 E:-21.790001 S:104.000000 Loc:804 Cons: 78.26%(fru)	3' AGGUCAGUUCCUACAAAUGU 5' dre-mir-30e-1 __ .:||...:|||||||||:.| __ 5' GUCAUAAGAGGAUGUUUGGA 3' ENSDART00000011294 E:-17.559999 S:98.000000 Loc:1029 Cons: 70.00%(fru)
dre-mir-30e-2	ENSDART00000011294	ENSDARG00000017438	SINFRUG00000145743		ENSDARG00000017438 1249 (1249 nt) [DEDICATOR OF CYTOKINESIS; DEDICATOR OF CYTOKINESIS; DEDICATOR OF CYTOKINESIS;] []	2	39.35	202	SINFRUG00000145743 (fru-miR-30e-2)		dre-mir-30e-1 dre-mir-30e-2		3' AGGUCAGUUCCUA---CAAAUGU 5' dre-mir-30e-2 __ |||||.|:|||||...||||:|. __ 5' UCCAGACGAGGAUGGGGUUUGCU 3' ENSDART00000011294 E:-21.790001 S:104.000000 Loc:804 Cons: 78.26%(fru)	3' AGGUCAGUUCCUACAAAUGU 5' dre-mir-30e-2 __ .:||...:|||||||||:.| __ 5' GUCAUAAGAGGAUGUUUGGA 3' ENSDART00000011294 E:-17.559999 S:98.000000 Loc:1029 Cons: 70.00%(fru)
dre-mir-24-1	ENSDART00000010111_P	ENSDARG00000004312	SINFRUG00000146828		ENSDARG00000004312 4001 (4001 nt) [VESICLE ASSOCIATED MEMBRANE ASSOCIATED A VAMP ASSOCIATED A VAMP A VAP A 33 KDA VAMP ASSOCIATED VAP 33; VESICLE ASSOCIATED MEMBRANE ASSOCIATED A VAMP ASSOCIATED A VAMP A VAP A 33 KDA VAMP ASSOCIATED VAP 33;] [Major sperm protein (MSP) domain:Major sperm protein (MSP) domain; Major sperm protein (MSP) domain:Major sperm protein (MSP) domain;]	2	40.33	202	SINFRUG00000146828 (fru-miR-24-1)		dre-mir-24-1		3' GACAAGGACGACUUGACUCGGU 5' dre-mir-24-1 __ |||.|.||.:||:|:|||||:. __ 5' CUGCU-CUAUUGGAUUGAGCUC 3' ENSDART00000010111_P E:-22.200001 S:105.000000 Loc:725 Cons: 76.19%(fru)	3' GACAAGGACGACUUGAC--UCGGU 5' dre-mir-24-1 __ |.|||.||||.|||:||..:||:: __ 5' CAGUUGCUGCAGAAUUGUCGGCUG 3' ENSDART00000010111_P E:-18.129999 S:97.000000 Loc:659 Cons: 70.83%(fru)
fru-mir-183-1	ENSDART00000021649_P	ENSDARG00000008762	SINFRUG00000154603		ENSDARG00000008762 4001 (4001 nt) [COCHLIN PRECURSOR COCH 5B2; COCHLIN PRECURSOR COCH 5B2; COCHLIN PRECURSOR COCH 5B2;] [von Willebrand factor, type A:von Willebrand factor, type A; LCCL domain:LCCL domain; von Willebrand factor, type A:von Willebrand factor, type A; LCCL domain:LCCL domain; von Willebrand factor, type A:von Willebrand factor, type A; LCCL domain:LCCL domain;]	2	43.92	202	SINFRUG00000154603 (fru-miR-183-1)		fru-mir-183-1 fru-mir-183-2 dre-mir-183		3' GUCACUUAAGAUGGUCACGGUAU 5' fru-mir-183-1 __ ::|||.|||||||.:.|||:||: __ 5' UGGUG-AUUCUACAGUUGCUAUG 3' ENSDART00000021649_P E:-21.959999 S:101.000000 Loc:229 Cons: 72.73%(fru)	3' GUCACUUAAGAUGGUCACGGUAU 5' fru-mir-183-1 __ ::|||.|||||||.:.|||:||: __ 5' UGGUG-AUUCUACAGUUGCUAUG 3' ENSDART00000021649_P E:-21.959999 S:101.000000 Loc:445 Cons: 72.73%(fru)
fru-mir-183-2	ENSDART00000021649_P	ENSDARG00000008762	SINFRUG00000154603		ENSDARG00000008762 4001 (4001 nt) [COCHLIN PRECURSOR COCH 5B2; COCHLIN PRECURSOR COCH 5B2; COCHLIN PRECURSOR COCH 5B2;] [von Willebrand factor, type A:von Willebrand factor, type A; LCCL domain:LCCL domain; von Willebrand factor, type A:von Willebrand factor, type A; LCCL domain:LCCL domain; von Willebrand factor, type A:von Willebrand factor, type A; LCCL domain:LCCL domain;]	2	43.92	202	SINFRUG00000154603 (fru-miR-183-2)		fru-mir-183-1 fru-mir-183-2 dre-mir-183		3' GUCACUUAAGAUGGUCACGGUAU 5' fru-mir-183-2 __ ::|||.|||||||.:.|||:||: __ 5' UGGUG-AUUCUACAGUUGCUAUG 3' ENSDART00000021649_P E:-21.959999 S:101.000000 Loc:229 Cons: 72.73%(fru)	3' GUCACUUAAGAUGGUCACGGUAU 5' fru-mir-183-2 __ ::|||.|||||||.:.|||:||: __ 5' UGGUG-AUUCUACAGUUGCUAUG 3' ENSDART00000021649_P E:-21.959999 S:101.000000 Loc:445 Cons: 72.73%(fru)
dre-mir-183	ENSDART00000021649_P	ENSDARG00000008762	SINFRUG00000154603		ENSDARG00000008762 4001 (4001 nt) [COCHLIN PRECURSOR COCH 5B2; COCHLIN PRECURSOR COCH 5B2; COCHLIN PRECURSOR COCH 5B2;] [von Willebrand factor, type A:von Willebrand factor, type A; LCCL domain:LCCL domain; von Willebrand factor, type A:von Willebrand factor, type A; LCCL domain:LCCL domain; von Willebrand factor, type A:von Willebrand factor, type A; LCCL domain:LCCL domain;]	2	43.92	202	SINFRUG00000154603 (dre-miR-183)		fru-mir-183-1 fru-mir-183-2 dre-mir-183		3' GUCACUUAAGAUGGUCACGGUAU 5' dre-mir-183 __ ::|||.|||||||.:.|||:||: __ 5' UGGUG-AUUCUACAGUUGCUAUG 3' ENSDART00000021649_P E:-21.959999 S:101.000000 Loc:229 Cons: 72.73%(fru)	3' GUCACUUAAGAUGGUCACGGUAU 5' dre-mir-183 __ ::|||.|||||||.:.|||:||: __ 5' UGGUG-AUUCUACAGUUGCUAUG 3' ENSDART00000021649_P E:-21.959999 S:101.000000 Loc:445 Cons: 72.73%(fru)
dre-mir-34-3b	ENSDART00000005543	ENSDARG00000002840	SINFRUG00000129791		ENSDARG00000002840 1669 (1669 nt) [SODIUM/POTASSIUM TRANSPORTING ATPASE ALPHA CHAIN EC_3.6.3.9 SODIUM PUMP NA+/K+ ATPASE;] [ATPase, E1-E2 type:ATPase, E1-E2 type; H+ transporting ATPase, proton pump:H+ transporting ATPase, proton pump; E1-E2 ATPase-associated region:E1-E2 ATPase-associated region; Cation transporting ATPase, C-terminal:Cation transporting ATPase, C-terminal; Cation transporting A…	2	38.41	202	SINFRUG00000129791 (dre-miR-34-3b)		dre-mir-34-3b		3' CAUUAGUUGAUUGACGUGACGGA 5' dre-mir-34-3b __ ||:|.|.|||..||||::||||| __ 5' GUGA-C-ACU--CUGCGUUGCCU 3' ENSDART00000005543 E:-20.92 S:109.000000 Loc:350 Cons: 78.95%(fru)	3' CAUUAGUUGAUUGACGUGACGGA 5' dre-mir-34-3b __ |||:..|:|..:||||.:||||. __ 5' GUAG--AGCCUGCUGCUUUGCCC 3' ENSDART00000005543 E:-17.49 S:93.000000 Loc:695 Cons: 76.19%(fru)
dre-mir-20-2a	ENSDART00000028002_P	ENSDARG00000015746	SINFRUG00000121575		ENSDARG00000015746 4001 (4001 nt) [DUAL SPECIFICITY KINASE EC_2.7.1.-;] [Protein kinase:Protein kinase;]	2	35.58	202	SINFRUG00000121575 (dre-miR-20-2a)		dre-mir-17-1d fru-mir-17-1e dre-mir-20-2a dre-mir-20-2b dre-mir-22-1 fru-mir-22-1a dre-mir-31-2a		3' GAUGGACGUGACACUCGUGA-AAC 5' dre-mir-20-2a __ :||.|||::||.||||:|||.||. __ 5' UUA-CUGUGCU-UGAGUACUGUUA 3' ENSDART00000028002_P E:-17.93 S:103.000000 Loc:1933 Cons: 72.73%(fru)	3' GAUGGACGUGACACUCGUGAAAC 5' dre-mir-20-2a __ :.|:|||.|||.||:|||.|||. __ 5' UAAUCUG-ACU-UGGGCAGUUUA 3' ENSDART00000028002_P E:-17.65 S:99.000000 Loc:2778 Cons: 71.43%(fru)
dre-mir-20-2b	ENSDART00000028002_P	ENSDARG00000015746	SINFRUG00000121575		ENSDARG00000015746 4001 (4001 nt) [DUAL SPECIFICITY KINASE EC_2.7.1.-;] [Protein kinase:Protein kinase;]	2	35.58	202	SINFRUG00000121575 (dre-miR-20-2b)		dre-mir-17-1d fru-mir-17-1e dre-mir-20-2a dre-mir-20-2b dre-mir-22-1 fru-mir-22-1a dre-mir-31-2a		3' GAUGGACGUGACACUCGUGA-AAC 5' dre-mir-20-2b __ :||.|||::||.||||:|||.||. __ 5' UUA-CUGUGCU-UGAGUACUGUUA 3' ENSDART00000028002_P E:-17.93 S:103.000000 Loc:1933 Cons: 72.73%(fru)	3' GAUGGACGUGACACUCGUGAAAC 5' dre-mir-20-2b __ :.|:|||.|||.||:|||.|||. __ 5' UAAUCUG-ACU-UGGGCAGUUUA 3' ENSDART00000028002_P E:-17.65 S:99.000000 Loc:2778 Cons: 71.43%(fru)
dre-mir-31	ENSDART00000011496_P	ENSDARG00000012077	SINFRUG00000145282		ENSDARG00000012077 4001 (4001 nt) [DNA CROSS LINK REPAIR 1B;] []	2	39.6	202	SINFRUG00000145282 (dre-miR-31)		fru-mir-106-b2 dre-mir-31 fru-mir-93-2b fru-mir-93-1a		3' GUCGAUACGGUUGU-AGAACGGU 5' dre-mir-31 __ |||||.||.|.|||.|:||||:| __ 5' CAGCUCUG-C-ACAGUUUUGCUA 3' ENSDART00000011496_P E:-20.33 S:103.000000 Loc:772 Cons: 80.95%(fru)	3' GUCGAUACGGUUGUAGAACGGU 5' dre-mir-31 __ |||||.||.|.||||:||.||| __ 5' CAGCUCUG-C-ACAUUUU-CCA 3' ENSDART00000011496_P E:-19.27 S:99.000000 Loc:569 Cons: 89.47%(fru)
fru-mir-152-1b	ENSDART00000019892_P	ENSDARG00000009254	SINFRUG00000123111		ENSDARG00000009254 4001 (4001 nt) [AMBIGUOUS;] []	2	35.08	202	SINFRUG00000123111 (fru-miR-152-1b)		fru-mir-152-1b		3' GUUUCAAGACAUUACGUGACU 5' fru-mir-152-1b __ .||||||.||||:|.:|:||| __ 5' AAAAGUU-UGUAGUUUAUUGA 3' ENSDART00000019892_P E:-17.059999 S:108.000000 Loc:772 Cons: 70.00%(fru)	3' GUUUCAAGACAUU--ACGUGACU 5' fru-mir-152-1b __ :||||..|||.|:..|||||||| __ 5' UAAAG-ACUGAAGUUUGCACUGA 3' ENSDART00000019892_P E:-18.02 S:94.000000 Loc:283 Cons: 72.73%(fru)
dre-mir-139	ENSDART00000018984	ENSDARG00000011721	SINFRUG00000128513		ENSDARG00000011721 2683 (2683 nt) [PRECURSOR; PRECURSOR;] [von Willebrand factor, type D:von Willebrand factor, type D; Trypsin inhibitor-like, cysteine-rich TIL region:Trypsin inhibitor-like, cysteine-rich TIL region; von Willebrand factor, type D:von Willebrand factor, type D; Trypsin inhibitor-like, cysteine-rich TIL region:Trypsin inhibitor-like, cysteine-rich TIL region;]	2	37.42	201	SINFRUG00000128513 (fru-miR-139)		dre-mir-139 fru-mir-204-1a		3' UGACCUCUGUGUACGUG-ACAUCU 5' dre-mir-139 __ ||||.|.||||.|||||.||.||| __ 5' ACUGUA-ACACCUGCACAUGCAGA 3' ENSDART00000018984 E:-20.07 S:109.000000 Loc:1709 Cons: 73.91%(fru)	3' UGACCUCUGUGUACGUGACAUCU 5' dre-mir-139 __ |:||.||...|..||||||.||| __ 5' AUUGUAG---CCAGCACUGAAGA 3' ENSDART00000018984 E:-17.35 S:92.000000 Loc:739 Cons: 70.00%(fru)
fru-mir-17-1e-as	ENSDART00000008832	ENSDARG00000010292	SINFRUG00000123979		ENSDARG00000010292 3626 (3626 nt) [SIMILAR TO MYOMEGALIN; SIMILAR TO MYOMEGALIN; SIMILAR TO MYOMEGALIN; SIMILAR TO MYOMEGALIN;] []	2	37.16	201	SINFRUG00000123979 (fru-miR-17-1e-as)		fru-mir-17-1e-as		3' UCUUCACGAGUGUGACGUCA 5' fru-mir-17-1e-as __ |.||||.:|:|:|:|||||. __ 5' AAAAGUAUUUAUAUUGCAGC 3' ENSDART00000008832 E:-19.74 S:108.000000 Loc:1183 Cons: 70.00%(fru)	3' UCUUC-ACGAGUGUGACGUCA 5' fru-mir-17-1e-as __ |||:|.||.|||.:.|||||| __ 5' AGAGGCUG-UCAGGAUGCAGU 3' ENSDART00000008832 E:-17.42 S:93.000000 Loc:1268 Cons: 70.00%(fru)
dre-mir-148-1b	ENSDART00000018516_P	ENSDARG00000013193	SINFRUG00000146863		ENSDARG00000013193 4001 (4001 nt) [AMBIGUOUS;] []	2	34.9	201	SINFRUG00000146863 (fru-miR-148-1b)		dre-mir-122a dre-mir-148-1b		3' GGUUUCAAGACAGUACGUGACU 5' dre-mir-148-1b __ .|.||.|||..|:|||:||||| __ 5' ACUAA-UUC--UUAUGUACUGA 3' ENSDART00000018516_P E:-17.719999 S:107.000000 Loc:1615 Cons: 73.68%(fru)	3' GGUUUCAAGACAGUACGUGACU 5' dre-mir-148-1b __ ::|||.|||||||||.||:|.: __ 5' UUAAA-UUCUGUCAU-CAUUUG 3' ENSDART00000018516_P E:-17.18 S:94.000000 Loc:1095 Cons: 75.00%(fru)
dre-mir-122a	ENSDART00000012907_P	ENSDARG00000009241	SINFRUG00000145473		ENSDARG00000009241 4001 (4001 nt) [KINASE;] [Tyrosine protein kinase:Tyrosine protein kinase; Protein kinase:Protein kinase;]	2	42.98	200	SINFRUG00000145473 (fru-miR-122a)		dre-mir-106-c1 dre-mir-122a		3' UGUUUGUGGUAACAGUGUGAGGU 5' dre-mir-122a __ |.|:|.||||..|||.::||||| __ 5' AAAGAAACCAGGGUCUUGCUCCA 3' ENSDART00000012907_P E:-22.280001 S:107.000000 Loc:499 Cons: 73.91%(fru)	3' UGUUUGUGGUAACAGUGUGAGGU 5' dre-mir-122a __ .||:|||.||.|.|||.:||||| __ 5' UCAGACA-CAAUCUCA-GCUCCA 3' ENSDART00000012907_P E:-20.700001 S:93.000000 Loc:1251 Cons: 71.43%(fru)
dre-mir-18-3b	ENSDART00000015906	ENSDARG00000017617	SINFRUG00000127260		ENSDARG00000017617 1244 (1244 nt) [DOLICHYL PYROPHOSPHATE MAN9GLCNAC2 ALPHA 1 3 GLUCOSYLTRANSFERASE EC_2.4.1.- DOLICHYL P GLC:MAN9GLCNAC2 PP DOLICHYL GLUCOSYLTRANSFERASE; DOLICHYL PYROPHOSPHATE MAN9GLCNAC2 ALPHA 1 3 GLUCOSYLTRANSFERASE EC_2.4.1.- DOLICHYL P GLC:MAN9GLCNAC2 PP DOLICHYL GLUCOSYLTRANSFERASE;] [ALG6, ALG8 glycosyltransferase:ALG6, ALG8 glycosyltransferase; ALG6, ALG8 glycosyltransfer…	2	40.51	200	SINFRUG00000127260 (dre-miR-18-3b)		dre-mir-122a dre-mir-18-3b dre-mir-18-3a fru-mir-18-3		3' AUUG-AUGUGUUCUACGUGGAAU 5' dre-mir-18-3b __ |::|..|||||.|:||||.|||: __ 5' UGGCAAACACAUGGUGCAGCUUG 3' ENSDART00000015906 E:-20.73 S:107.000000 Loc:549 Cons: 95.65%(fru)	3' AUUGAUGUGUUCUACGUGGAAU 5' dre-mir-18-3b __ |:|||::||..|:||.|||||. __ 5' UGACUGUAC-UGGUG-ACCUUU 3' ENSDART00000015906 E:-19.780001 S:93.000000 Loc:432 Cons: 70.00%(fru)
dre-mir-18-3a	ENSDART00000015906	ENSDARG00000017617	SINFRUG00000127260		ENSDARG00000017617 1244 (1244 nt) [DOLICHYL PYROPHOSPHATE MAN9GLCNAC2 ALPHA 1 3 GLUCOSYLTRANSFERASE EC_2.4.1.- DOLICHYL P GLC:MAN9GLCNAC2 PP DOLICHYL GLUCOSYLTRANSFERASE; DOLICHYL PYROPHOSPHATE MAN9GLCNAC2 ALPHA 1 3 GLUCOSYLTRANSFERASE EC_2.4.1.- DOLICHYL P GLC:MAN9GLCNAC2 PP DOLICHYL GLUCOSYLTRANSFERASE;] [ALG6, ALG8 glycosyltransferase:ALG6, ALG8 glycosyltransferase; ALG6, ALG8 glycosyltransfer…	2	40.51	200	SINFRUG00000127260 (dre-miR-18-3a)		dre-mir-122a dre-mir-18-3b dre-mir-18-3a fru-mir-18-3		3' AUUG-AUGUGUUCUACGUGGAAU 5' dre-mir-18-3a __ |::|..|||||.|:||||.|||: __ 5' UGGCAAACACAUGGUGCAGCUUG 3' ENSDART00000015906 E:-20.73 S:107.000000 Loc:549 Cons: 95.65%(fru)	3' AUUGAUGUGUUCUACGUGGAAU 5' dre-mir-18-3a __ |:|||::||..|:||.|||||. __ 5' UGACUGUAC-UGGUG-ACCUUU 3' ENSDART00000015906 E:-19.780001 S:93.000000 Loc:432 Cons: 70.00%(fru)
dre-mir-22-1	ENSDART00000010794_P	ENSDARG00000016911	SINFRUG00000140576		ENSDARG00000016911 3188 (3188 nt) [ROTAVIRUS 'X' ASSOCIATED NON STRUCTURAL ROXAN;] [TPR repeat:TPR repeat;]	2	37.84	200	SINFRUG00000140576 (dre-miR-22-1)		fru-mir-17-1e-as dre-mir-22-1 fru-mir-22-1a		3' UGUCAAGAAGUCGACCGUCGAA 5' dre-mir-22-1 __ |||...|.||||||.||||||. __ 5' ACA---CCUCAGCUCGCAGCUC 3' ENSDART00000010794_P E:-19.620001 S:104.000000 Loc:167 Cons: 78.95%(fru)	3' UGUCAAGAAGUCGACCGUCGAA 5' dre-mir-22-1 __ |||...:|||||||.||||:.. __ 5' ACAUCAUUUCAGCUUGCAGUGC 3' ENSDART00000010794_P E:-18.219999 S:96.000000 Loc:464 Cons: 77.27%(fru)
fru-mir-22-1a	ENSDART00000010794_P	ENSDARG00000016911	SINFRUG00000140576		ENSDARG00000016911 3188 (3188 nt) [ROTAVIRUS 'X' ASSOCIATED NON STRUCTURAL ROXAN;] [TPR repeat:TPR repeat;]	2	37.84	200	SINFRUG00000140576 (fru-miR-22-1a)		fru-mir-17-1e-as dre-mir-22-1 fru-mir-22-1a		3' UGUCAAGAAGUCGACCGUCGAA 5' fru-mir-22-1a __ |||...|.||||||.||||||. __ 5' ACA---CCUCAGCUCGCAGCUC 3' ENSDART00000010794_P E:-19.620001 S:104.000000 Loc:167 Cons: 78.95%(fru)	3' UGUCAAGAAGUCGACCGUCGAA 5' fru-mir-22-1a __ |||...:|||||||.||||:.. __ 5' ACAUCAUUUCAGCUUGCAGUGC 3' ENSDART00000010794_P E:-18.219999 S:96.000000 Loc:464 Cons: 77.27%(fru)
dre-mir-138-1	ENSDART00000011942_P	ENSDARG00000012785	SINFRUG00000131940		EMPTY SPIRACLES HOMEOBOX 2. [Source:RefSeq;Acc:NM_131280] ENSDARG00000012785 (1) (5848 5848 9574 9574 66095) 4001 (4001 nt) [HOMEOBOX;] [Homeobox:Homeobox; Helix-turn-helix motif, lambda-like repressor:Helix-turn-helix motif, lambda-like repressor;]	2	36.38	199	SINFRUG00000131940 (fru-miR-138-1)		dre-mir-138-2 dre-mir-138-1 dre-mir-142-2a-as dre-mir-142-1a-as dre-mir-153-1b dre-mir-172 dre-mir-22-1 fru-mir-22-1a dre-mir-25 dre-mir-31 dre-mir-34 dre-mir-98-3a dre-mir-98-3b dre-mir-98-2a dre-mir-98-1a dre-mir-let7l-a dre-mir-let7l-a1 dre-mir-let7l-a2 dre-mir-let7l-b1 dre-mir-let7l-c1 fru-mir-let7l-c2 dre-mir-let7l-d1 fru-mir-let7l-d2	GO:0003700->transcription factor activity GO:0005634->nucleus GO:0005634->nucleus GO:0003677->DNA binding GO:0006355->regulation of transcription, DNA-dependent	3' CGGACUAAGUGUUGUGGUCGA 5' dre-mir-138-1 __ ||:|.|||.||||..|||||| __ 5' GCUUUAUU-ACAAACCCAGCU 3' ENSDART00000011942_P E:-17.07 S:104.000000 Loc:2113 Cons: 100.00%(fru)	3' CGGACUA-AG--UGUUGUGG-UCGA 5' dre-mir-138-1 __ .|||.||.||..:|||||||.|||. __ 5' UCCU-AUCUCGGGCAACACCGAGCG 3' ENSDART00000011942_P E:-19.309999 S:95.000000 Loc:2245 Cons: 83.33%(fru)
dre-mir-20-2b	ENSDART00000004693_P	ENSDARG00000020893	SINFRUG00000155066		ENSDARG00000020893 4001 (4001 nt) [MITOCHONDRIAL GLUTAMATE CARRIER SOLUTE CARRIER FAMILY 25 MEMBER; MITOCHONDRIAL GLUTAMATE CARRIER SOLUTE CARRIER FAMILY 25 MEMBER;] [Mitochondrial carrier protein:Mitochondrial carrier protein; Adenine nucleotide translocator 1:Adenine nucleotide translocator 1; Mitochondrial substrate carrier:Mitochondrial substrate carrier; Mitochondrial carrier protein:Mitocho…	2	37.8	199	SINFRUG00000155066 (dre-miR-20-2b)		dre-mir-20-2b dre-mir-20-2a dre-mir-23-a1 fru-mir-23-c2 dre-mir-23-c1 fru-mir-93-1a		3' GAUGGACGUGAC--ACUCGUGAAAC 5' dre-mir-20-2b __ .||:|.||||||..|||.:|:|||. __ 5' AUAUC-GCACUGUUUGAUUAUUUUA 3' ENSDART00000004693_P E:-17.620001 S:101.000000 Loc:2606 Cons: 70.83%(fru)	3' GAUGGAC-GUGACACUCGUGAAAC 5' dre-mir-20-2b __ ..|:|||.||:|||||.:|:|||. __ 5' AAAUCUGACAUUGUGA-UAUUUUU 3' ENSDART00000004693_P E:-20.18 S:98.000000 Loc:2073 Cons: 73.91%(fru)
dre-mir-20-2a	ENSDART00000004693_P	ENSDARG00000020893	SINFRUG00000155066		ENSDARG00000020893 4001 (4001 nt) [MITOCHONDRIAL GLUTAMATE CARRIER SOLUTE CARRIER FAMILY 25 MEMBER; MITOCHONDRIAL GLUTAMATE CARRIER SOLUTE CARRIER FAMILY 25 MEMBER;] [Mitochondrial carrier protein:Mitochondrial carrier protein; Adenine nucleotide translocator 1:Adenine nucleotide translocator 1; Mitochondrial substrate carrier:Mitochondrial substrate carrier; Mitochondrial carrier protein:Mitocho…	2	37.8	199	SINFRUG00000155066 (dre-miR-20-2a)		dre-mir-20-2b dre-mir-20-2a dre-mir-23-a1 fru-mir-23-c2 dre-mir-23-c1 fru-mir-93-1a		3' GAUGGACGUGAC--ACUCGUGAAAC 5' dre-mir-20-2a __ .||:|.||||||..|||.:|:|||. __ 5' AUAUC-GCACUGUUUGAUUAUUUUA 3' ENSDART00000004693_P E:-17.620001 S:101.000000 Loc:2606 Cons: 70.83%(fru)	3' GAUGGAC-GUGACACUCGUGAAAC 5' dre-mir-20-2a __ ..|:|||.||:|||||.:|:|||. __ 5' AAAUCUGACAUUGUGA-UAUUUUU 3' ENSDART00000004693_P E:-20.18 S:98.000000 Loc:2073 Cons: 73.91%(fru)
dre-mir-135-2a	ENSDART00000022937	ENSDARG00000013502	SINFRUG00000121560		ENSDARG00000013502 937 (937 nt) [WILMS' TUMOR; WILMS' TUMOR;] [Wilm's tumour protein:Wilm's tumour protein; Zn-finger, C2H2 type:Zn-finger, C2H2 type; Wilm's tumour protein:Wilm's tumour protein; Zn-finger, C2H2 type:Zn-finger, C2H2 type;]	2	46.54	199	SINFRUG00000121560 (fru-miR-135-2a)		dre-mir-135-2a dre-mir-135-2b dre-mir-135-3a dre-mir-135-1a fru-mir-135-1b fru-mir-17-1e-as		3' AGUGUAUCCUUAUCUUUCGGUAU 5' dre-mir-135-2a __ .||||.|||::.|.||||||:|| __ 5' ACACACAGGGG-A-AAAGCCGUA 3' ENSDART00000022937 E:-24.110001 S:106.000000 Loc:721 Cons: 76.19%(fru)	3' AGUGUAUCCUUAUCUUUCGGUAU 5' dre-mir-135-2a __ .||||.|||..|:.:|||||:|. __ 5' ACACACAGG--UGAGAAGCCGUU 3' ENSDART00000022937 E:-22.43 S:93.000000 Loc:811 Cons: 76.19%(fru)
dre-mir-135-2b	ENSDART00000022937	ENSDARG00000013502	SINFRUG00000121560		ENSDARG00000013502 937 (937 nt) [WILMS' TUMOR; WILMS' TUMOR;] [Wilm's tumour protein:Wilm's tumour protein; Zn-finger, C2H2 type:Zn-finger, C2H2 type; Wilm's tumour protein:Wilm's tumour protein; Zn-finger, C2H2 type:Zn-finger, C2H2 type;]	2	46.54	199	SINFRUG00000121560 (dre-miR-135-2b)		dre-mir-135-2a dre-mir-135-2b dre-mir-135-3a dre-mir-135-1a fru-mir-135-1b fru-mir-17-1e-as		3' AGUGUAUCCUUAUCUUUCGGUAU 5' dre-mir-135-2b __ .||||.|||::.|.||||||:|| __ 5' ACACACAGGGG-A-AAAGCCGUA 3' ENSDART00000022937 E:-24.110001 S:106.000000 Loc:721 Cons: 76.19%(fru)	3' AGUGUAUCCUUAUCUUUCGGUAU 5' dre-mir-135-2b __ .||||.|||..|:.:|||||:|. __ 5' ACACACAGG--UGAGAAGCCGUU 3' ENSDART00000022937 E:-22.43 S:93.000000 Loc:811 Cons: 76.19%(fru)
dre-mir-184	ENSDART00000015958_P	ENSDARG00000008470	SINFRUG00000151243		ENSDARG00000008470 1066 (1066 nt) [ORNITHINE AMINOTRANSFERASE MITOCHONDRIAL PRECURSOR EC_2.6.1.13 ORNITHINE OXO ACID AMINOTRANSFERASE;] [Aminotransferase class-III:Aminotransferase class-III;]	2	39.54	199	SINFRUG00000151243 (dre-miR-184)		dre-mir-184		3' CGGGAAUAGUCAAGAG-GCAGGU 5' dre-mir-184 __ .:|:||||..|||:||.:|||:| __ 5' CUCUUUAU--GUUUUCGUGUCUA 3' ENSDART00000015958_P E:-17.48 S:100.000000 Loc:457 Cons: 71.43%(fru)	3' CGGGAAUAGUCAAGAGGCAGGU 5' dre-mir-184 __ |:||.|:|.|.||||.|||||| __ 5' GUCC-UGUGA-UUCU-CGUCCA 3' ENSDART00000015958_P E:-22.059999 S:99.000000 Loc:503 Cons: 78.95%(fru)
dre-mir-122a	ENSDART00000025190_P	ENSDARG00000013974	SINFRUG00000148709		ENSDARG00000013974 4001 (4001 nt) [RING FINGER 26;] [Zn-finger, RING:Zn-finger, RING;]	2	36.72	199	SINFRUG00000148709 (fru-miR-122a)		dre-mir-122a dre-mir-143-1a		3' UGUUUGUGGUAACAGUGUGAGGU 5' dre-mir-122a __ ::||:.|::.||||.|||||:|| __ 5' GUAAGAAUUCUUGU-ACACUUCA 3' ENSDART00000025190_P E:-17.559999 S:107.000000 Loc:341 Cons: 72.73%(fru)	3' UGUUUGUGGUAACAGUGUGAGGU 5' dre-mir-122a __ :||:|.|.::.||||.||:|||| __ 5' GCAGA-AAUG-UGUC-CAUUCCA 3' ENSDART00000025190_P E:-19.16 S:92.000000 Loc:79 Cons: 80.00%(fru)
dre-mir-15-1b	ENSDART00000017723_P	ENSDARG00000002975	SINFRUG00000129874		ENSDARG00000002975 4001 (4001 nt) [FORKHEAD BOX;] [Fork head transcription factor:Fork head transcription factor;]	2	37.69	199	SINFRUG00000129874 (dre-miR-15-1b)		dre-mir-130-1c dre-mir-130-1a dre-mir-15-1b dre-mir-15-1a fru-mir-304		3' GUGUUUGGUAAGACACGACGAU 5' dre-mir-15-1b __ ||:|:::||||:|.||:||:.| __ 5' CAUAGGUCAUUUUUUGUUGUAA 3' ENSDART00000017723_P E:-19.440001 S:103.000000 Loc:691 Cons: 100.00%(fru)	3' GUGUUUGGUAAGACACGAC-GAU 5' dre-mir-15-1b __ :.||.::||.||||||:||.||. __ 5' UUCAUGUCA-UCUGUGUUGUCUU 3' ENSDART00000017723_P E:-18.25 S:96.000000 Loc:1447 Cons: 86.36%(fru)
dre-mir-138-1	ENSDART00000028026	ENSDARG00000007644	SINFRUG00000145113		ENSDARG00000007644 2334 (2334 nt) [SERINE/THREONINE KINASE 10 EC_2.7.1.37 LYMPHOCYTE ORIENTED KINASE; SERINE/THREONINE KINASE 10 EC_2.7.1.37 LYMPHOCYTE ORIENTED KINASE; SERINE/THREONINE KINASE 10 EC_2.7.1.37 LYMPHOCYTE ORIENTED KINASE; SERINE/THREONINE KINASE 10 EC_2.7.1.37 LYMPHOCYTE ORIENTED KINASE; SERINE/THREONINE KINASE 10 EC_2.7.1.37 LYMPHOCYTE ORIENTED KINASE;] [Tyrosine protein kinase:Tyr…	2	38.51	198	SINFRUG00000145113 (fru-miR-138-1)		dre-mir-138-1		3' CGGACUAAGUGUU-GUGGUCGA 5' dre-mir-138-1 __ |:||.|..|||||.||.||||| __ 5' GUCUCAACCACAAGCAGCAGCU 3' ENSDART00000028026 E:-18.530001 S:101.000000 Loc:1606 Cons: 86.36%(fru)	3' CGGACUAAGUGUUGUGGUCGA 5' dre-mir-138-1 __ .||.||...|||:||.||||| __ 5' UCCAGA--GACAGCAGCAGCU 3' ENSDART00000028026 E:-19.98 S:97.000000 Loc:1520 Cons: 73.68%(fru)
dre-mir-27-2a	ENSDART00000027571_P	ENSDARG00000018539	SINFRUG00000125804		ENSDARG00000018539 4001 (4001 nt) [UNKNOWN;] [Sterile alpha motif SAM:Sterile alpha motif SAM;]	2	42.07	198	SINFRUG00000125804 (fru-miR-27-2a)		dre-mir-27-2a		3' CGUCUUGAAUCGGUGACACUU 5' dre-mir-27-2a __ ||||.||...|.||||||||. __ 5' GCAGCAC---GACACUGUGAU 3' ENSDART00000027571_P E:-18.940001 S:99.000000 Loc:70 Cons: 77.78%(fru)	3' CGUCUUGAAUCGGUGACACUU 5' dre-mir-27-2a __ ||||:|.||.|.|:||||||| __ 5' GCAGGA-UU-G-CGCUGUGAA 3' ENSDART00000027571_P E:-23.129999 S:99.000000 Loc:116 Cons: 83.33%(fru)
dre-mir-144	ENSDART00000026929_P	ENSDARG00000003649	SINFRUG00000126953		ENSDARG00000003649 4001 (4001 nt) [AMBIGUOUS; AMBIGUOUS;] [Protein of unknown function UPF0005:Protein of unknown function UPF0005; Protein of unknown function UPF0005:Protein of unknown function UPF0005;]	2	38.5	198	SINFRUG00000126953 (fru-miR-144)		dre-mir-138-1 dre-mir-144 dre-mir-200b-1a fru-mir-200b-2a		3' UAUCAUGUA-G---UAGAUAUGACAU 5' dre-mir-144 __ ||||.||||.|...||.|:||||||. __ 5' AUAG-ACAUCCAAAAUGUGUACUGUU 3' ENSDART00000026929_P E:-18.07 S:100.000000 Loc:1589 Cons: 72.00%(fru)	3' UAUCAUGUAG---UAGAUAUGACAU 5' dre-mir-144 __ :.||.|||||...||.|:||||||. __ 5' GGAG-ACAUCAUAAUAUGUACUGUU 3' ENSDART00000026929_P E:-20.43 S:98.000000 Loc:1085 Cons: 75.00%(fru)
dre-mir-34-3b	ENSDART00000005429_P	ENSDARG00000020731	SINFRUG00000139255		ENSDARG00000020731 4001 (4001 nt) [UNKNOWN;] []	2	39.1	198	SINFRUG00000139255 (dre-miR-34-3b)		fru-mir-10a dre-mir-18-1 fru-mir-18-1b fru-mir-18-1a dre-mir-23-a1 fru-mir-23-c2 dre-mir-23-c1 dre-mir-23-b1 dre-mir-34-3b		3' CAUUAGUUGAUUGACGUGACGGA 5' dre-mir-34-3b __ ..||||..||::||||.||.||| __ 5' ACAAUCCUCUGGCUGCUCUUCCU 3' ENSDART00000005429_P E:-21.879999 S:106.000000 Loc:688 Cons: 91.30%(fru)	3' CAUUA-GUUGAUUGACGUGACGGA 5' dre-mir-34-3b __ |||||.||.||..:|||.|||||. __ 5' GUAAUACAUCU--UUGC-CUGCCA 3' ENSDART00000005429_P E:-17.219999 S:92.000000 Loc:1024 Cons: 71.43%(fru)
fru-mir-17-1e-as	ENSDART00000015322_P	ENSDARG00000012116	SINFRUG00000122015		ENSDARG00000012116 4001 (4001 nt) [UNKNOWN;] []	2	37.51	198	SINFRUG00000122015 (fru-miR-17-1e-as)		fru-mir-17-1e-as dre-mir-17-1c dre-mir-199-1a dre-mir-199-1c dre-mir-199-1b fru-mir-21-1c dre-mir-21-1a dre-mir-21-1b fru-mir-93-1a		3' UCUUCACGAGUGUGACGUCA 5' fru-mir-17-1e-as __ :|:|||.||:.:::|||||| __ 5' GGGAGUUCUUCUGUUGCAGU 3' ENSDART00000015322_P E:-19.389999 S:101.000000 Loc:427 Cons: 70.00%(fru)	3' UCUUCACGAGUGUGACGUCA 5' fru-mir-17-1e-as __ |.|||||...|:|||||||. __ 5' AAAAGUG---AUACUGCAGG 3' ENSDART00000015322_P E:-18.120001 S:97.000000 Loc:357 Cons: 76.47%(fru)
dre-mir-122a	ENSDART00000027327_P	ENSDARG00000014934	SINFRUG00000138059		ENSDARG00000014934 4001 (4001 nt) [AMBIGUOUS; AMBIGUOUS; AMBIGUOUS; AMBIGUOUS; AMBIGUOUS;] []	2	43.3	198	SINFRUG00000149655 (fru-miR-122a)		dre-mir-122a fru-mir-93-1a		3' UGUUUGUGG-UAACAGUGUGAGGU 5' dre-mir-122a __ .||::||:|.||||..||||||:| __ 5' UCAGGCAUCAAUUG--ACACUCUA 3' ENSDART00000027327_P E:-23.940001 S:102.000000 Loc:2576 Cons: 72.73%(fru)	3' UGUUUGUG-GUAACAGUGUGAGGU 5' dre-mir-122a __ ||||||||.||....||||:|::| __ 5' ACAAACACGCA----CACAUUUUA 3' ENSDART00000027327_P E:-19.360001 S:96.000000 Loc:2713 Cons: 70.00%(fru)
fru-mir-10a	ENSDART00000000184_P	ENSDARG00000000175	SINFRUG00000131118		HOMEOBOX PROTEIN HOX-B3 (FRAGMENT). [Source:SWISSPROT;Acc:O42368] ENSDARG00000000175 (1) (216088 216088 218010 218010 235235) 4001 (4001 nt) [HOMEOBOX; HOMEOBOX HOX A2;] [Homeobox:Homeobox; Homeobox protein, antennapedia type:Homeobox protein, antennapedia type; Helix-turn-helix motif, lambda-like repressor:Helix-turn-helix motif, lambda-like repressor; Homeobox:Homeobox; Helix-turn-helix motif, …	2	38.82	197	SINFRUG00000136635 (fru-miR-10a)		fru-mir-10a dre-mir-10-1a dre-mir-10-1b dre-mir-124-1e dre-mir-124-1c dre-mir-124-1b dre-mir-124-1a dre-mir-124-1d dre-mir-139	GO:0003700->transcription factor activity GO:0003700->transcription factor activity GO:0005634->nucleus GO:0005634->nucleus GO:0005634->nucleus GO:0005634->nucleus GO:0003677->DNA binding GO:0003677->DNA binding GO:0007275->development GO:0007275->development GO:0006355->regulation of transcription, DNA-dependent GO:0006355->regulation of transcription, DNA-dependent GO:0006355->regulation of tra…	3' UGUUUAGGCCUAGA-UGUCCCAU 5' fru-mir-10a __ .:.:||.:||.|:|.|||||||| __ 5' UUUGAUAUGGCUUUGACAGGGUA 3' ENSDART00000000184_P E:-18.690001 S:106.000000 Loc:578 Cons: 73.91%(fru)	3' UGUUUAGGCCUAGAUGUCCCAU 5' fru-mir-10a __ .:.||..:|||..||||||||| __ 5' UUUAACGUGGA--UACAGGGUA 3' ENSDART00000000184_P E:-20.129999 S:91.000000 Loc:755 Cons: 70.00%(fru)
dre-mir-15-1a	ENSDART00000023835_P	ENSDARG00000020096	SINFRUG00000146907		ENSDARG00000020096 4001 (4001 nt) [PROLIFERATING CELL NUCLEOLAR ANTIGEN P120 PROLIFERATION ASSOCIATED NUCLEOLAR P120;] [Bacterial Sun/eukaryotic nucleolar Nop1/Nop2:Bacterial Sun/eukaryotic nucleolar Nop1/Nop2;]	2	37.52	197	SINFRUG00000146907 (fru-miR-15-1a)		dre-mir-106-a1 fru-mir-106-b2 dre-mir-15-1a dre-mir-15-1b fru-mir-17-1e dre-mir-17-1a dre-mir-17-1c dre-mir-17-1b dre-mir-17-1d dre-mir-20-2b dre-mir-20-2a dre-mir-20-1 dre-mir-20-1b fru-mir-93-1a fru-mir-93-2b		3' GUGUUUGGUAAGACACGACGAU 5' dre-mir-15-1a __ ..||||..|..|||||:||||. __ 5' GUCAAA--AAACUGUGUUGCUU 3' ENSDART00000023835_P E:-18.530001 S:103.000000 Loc:2119 Cons: 80.00%(fru)	3' GUGUUUGGUAAGACA-CGACGAU 5' dre-mir-15-1a __ :.||||:|...||||.|:||:|: __ 5' UUCAAAUCUACCUGUAGUUGUUG 3' ENSDART00000023835_P E:-18.99 S:94.000000 Loc:1446 Cons: 73.91%(fru)
dre-mir-15-1b	ENSDART00000023835_P	ENSDARG00000020096	SINFRUG00000146907		ENSDARG00000020096 4001 (4001 nt) [PROLIFERATING CELL NUCLEOLAR ANTIGEN P120 PROLIFERATION ASSOCIATED NUCLEOLAR P120;] [Bacterial Sun/eukaryotic nucleolar Nop1/Nop2:Bacterial Sun/eukaryotic nucleolar Nop1/Nop2;]	2	37.52	197	SINFRUG00000146907 (dre-miR-15-1b)		dre-mir-106-a1 fru-mir-106-b2 dre-mir-15-1a dre-mir-15-1b fru-mir-17-1e dre-mir-17-1a dre-mir-17-1c dre-mir-17-1b dre-mir-17-1d dre-mir-20-2b dre-mir-20-2a dre-mir-20-1 dre-mir-20-1b fru-mir-93-1a fru-mir-93-2b		3' GUGUUUGGUAAGACACGACGAU 5' dre-mir-15-1b __ ..||||..|..|||||:||||. __ 5' GUCAAA--AAACUGUGUUGCUU 3' ENSDART00000023835_P E:-18.530001 S:103.000000 Loc:2119 Cons: 80.00%(fru)	3' GUGUUUGGUAAGACA-CGACGAU 5' dre-mir-15-1b __ :.||||:|...||||.|:||:|: __ 5' UUCAAAUCUACCUGUAGUUGUUG 3' ENSDART00000023835_P E:-18.99 S:94.000000 Loc:1446 Cons: 73.91%(fru)
dre-mir-124-1b	ENSDART00000019184_P	ENSDARG00000015407	SINFRUG00000154578		ENSDARG00000015407 4001 (4001 nt) [LEUCINE RICH REPEAT TRANSMEMBRANE PRECURSOR FIBRONECTIN DOMAIN CONTAINING LEUCINE RICH TRANSMEMBRANE;] [Fibronectin, type III:Fibronectin, type III; Leucine-rich repeat:Leucine-rich repeat; Cysteine-rich flanking region, N-terminal:Cysteine-rich flanking region, N-terminal; Cysteine-rich flanking region, C-terminal:Cysteine-rich flanking region, C-terminal;]	2	43.69	197	SINFRUG00000154578 (fru-miR-124-1b)		dre-mir-106-a1 dre-mir-124-1b dre-mir-124-1a dre-mir-124-1c dre-mir-124-1d dre-mir-124-1e dre-mir-130-1a dre-mir-130-1c dre-mir-130-2a dre-mir-144 dre-mir-17-1a fru-mir-18-3 fru-mir-182-1 dre-mir-182 fru-mir-182-2 dre-mir-24-1 dre-mir-27-3a dre-mir-27-2a dre-mir-34-3b fru-mir-93-2b		3' GAACC-GUAAGUG-GCGCACGGAAUU 5' dre-mir-124-1b __ :||||.||.||.:.:.:|||||||:| __ 5' UUUGGCCAGUCUUGUAUGUGCCUUGA 3' ENSDART00000019184_P E:-23.91 S:106.000000 Loc:1077 Cons: 92.31%(fru)	3' GAACCGUAAGUGGCGCACGGAAUU 5' dre-mir-124-1b __ .|.||:.||||::||.||:.||:| __ 5' GUGGGUUUUCAUUGC-UGUGUUGA 3' ENSDART00000019184_P E:-19.780001 S:91.000000 Loc:334 Cons: 100.00%(fru)
dre-mir-124-1a	ENSDART00000019184_P	ENSDARG00000015407	SINFRUG00000154578		ENSDARG00000015407 4001 (4001 nt) [LEUCINE RICH REPEAT TRANSMEMBRANE PRECURSOR FIBRONECTIN DOMAIN CONTAINING LEUCINE RICH TRANSMEMBRANE;] [Fibronectin, type III:Fibronectin, type III; Leucine-rich repeat:Leucine-rich repeat; Cysteine-rich flanking region, N-terminal:Cysteine-rich flanking region, N-terminal; Cysteine-rich flanking region, C-terminal:Cysteine-rich flanking region, C-terminal;]	2	43.69	197	SINFRUG00000154578 (dre-miR-124-1a)		dre-mir-106-a1 dre-mir-124-1b dre-mir-124-1a dre-mir-124-1c dre-mir-124-1d dre-mir-124-1e dre-mir-130-1a dre-mir-130-1c dre-mir-130-2a dre-mir-144 dre-mir-17-1a fru-mir-18-3 fru-mir-182-1 dre-mir-182 fru-mir-182-2 dre-mir-24-1 dre-mir-27-3a dre-mir-27-2a dre-mir-34-3b fru-mir-93-2b		3' GAACC-GUAAGUG-GCGCACGGAAUU 5' dre-mir-124-1a __ :||||.||.||.:.:.:|||||||:| __ 5' UUUGGCCAGUCUUGUAUGUGCCUUGA 3' ENSDART00000019184_P E:-23.91 S:106.000000 Loc:1077 Cons: 92.31%(fru)	3' GAACCGUAAGUGGCGCACGGAAUU 5' dre-mir-124-1a __ .|.||:.||||::||.||:.||:| __ 5' GUGGGUUUUCAUUGC-UGUGUUGA 3' ENSDART00000019184_P E:-19.780001 S:91.000000 Loc:334 Cons: 100.00%(fru)
dre-mir-124-1c	ENSDART00000019184_P	ENSDARG00000015407	SINFRUG00000154578		ENSDARG00000015407 4001 (4001 nt) [LEUCINE RICH REPEAT TRANSMEMBRANE PRECURSOR FIBRONECTIN DOMAIN CONTAINING LEUCINE RICH TRANSMEMBRANE;] [Fibronectin, type III:Fibronectin, type III; Leucine-rich repeat:Leucine-rich repeat; Cysteine-rich flanking region, N-terminal:Cysteine-rich flanking region, N-terminal; Cysteine-rich flanking region, C-terminal:Cysteine-rich flanking region, C-terminal;]	2	43.69	197	SINFRUG00000154578 (fru-miR-124-1c)		dre-mir-106-a1 dre-mir-124-1b dre-mir-124-1a dre-mir-124-1c dre-mir-124-1d dre-mir-124-1e dre-mir-130-1a dre-mir-130-1c dre-mir-130-2a dre-mir-144 dre-mir-17-1a fru-mir-18-3 fru-mir-182-1 dre-mir-182 fru-mir-182-2 dre-mir-24-1 dre-mir-27-3a dre-mir-27-2a dre-mir-34-3b fru-mir-93-2b		3' GAACC-GUAAGUG-GCGCACGGAAUU 5' dre-mir-124-1c __ :||||.||.||.:.:.:|||||||:| __ 5' UUUGGCCAGUCUUGUAUGUGCCUUGA 3' ENSDART00000019184_P E:-23.91 S:106.000000 Loc:1077 Cons: 92.31%(fru)	3' GAACCGUAAGUGGCGCACGGAAUU 5' dre-mir-124-1c __ .|.||:.||||::||.||:.||:| __ 5' GUGGGUUUUCAUUGC-UGUGUUGA 3' ENSDART00000019184_P E:-19.780001 S:91.000000 Loc:334 Cons: 100.00%(fru)
dre-mir-124-1d	ENSDART00000019184_P	ENSDARG00000015407	SINFRUG00000154578		ENSDARG00000015407 4001 (4001 nt) [LEUCINE RICH REPEAT TRANSMEMBRANE PRECURSOR FIBRONECTIN DOMAIN CONTAINING LEUCINE RICH TRANSMEMBRANE;] [Fibronectin, type III:Fibronectin, type III; Leucine-rich repeat:Leucine-rich repeat; Cysteine-rich flanking region, N-terminal:Cysteine-rich flanking region, N-terminal; Cysteine-rich flanking region, C-terminal:Cysteine-rich flanking region, C-terminal;]	2	43.69	197	SINFRUG00000154578 (fru-miR-124-1d)		dre-mir-106-a1 dre-mir-124-1b dre-mir-124-1a dre-mir-124-1c dre-mir-124-1d dre-mir-124-1e dre-mir-130-1a dre-mir-130-1c dre-mir-130-2a dre-mir-144 dre-mir-17-1a fru-mir-18-3 fru-mir-182-1 dre-mir-182 fru-mir-182-2 dre-mir-24-1 dre-mir-27-3a dre-mir-27-2a dre-mir-34-3b fru-mir-93-2b		3' GAACC-GUAAGUG-GCGCACGGAAUU 5' dre-mir-124-1d __ :||||.||.||.:.:.:|||||||:| __ 5' UUUGGCCAGUCUUGUAUGUGCCUUGA 3' ENSDART00000019184_P E:-23.91 S:106.000000 Loc:1077 Cons: 92.31%(fru)	3' GAACCGUAAGUGGCGCACGGAAUU 5' dre-mir-124-1d __ .|.||:.||||::||.||:.||:| __ 5' GUGGGUUUUCAUUGC-UGUGUUGA 3' ENSDART00000019184_P E:-19.780001 S:91.000000 Loc:334 Cons: 100.00%(fru)
dre-mir-124-1e	ENSDART00000019184_P	ENSDARG00000015407	SINFRUG00000154578		ENSDARG00000015407 4001 (4001 nt) [LEUCINE RICH REPEAT TRANSMEMBRANE PRECURSOR FIBRONECTIN DOMAIN CONTAINING LEUCINE RICH TRANSMEMBRANE;] [Fibronectin, type III:Fibronectin, type III; Leucine-rich repeat:Leucine-rich repeat; Cysteine-rich flanking region, N-terminal:Cysteine-rich flanking region, N-terminal; Cysteine-rich flanking region, C-terminal:Cysteine-rich flanking region, C-terminal;]	2	43.69	197	SINFRUG00000154578 (fru-miR-124-1e)		dre-mir-106-a1 dre-mir-124-1b dre-mir-124-1a dre-mir-124-1c dre-mir-124-1d dre-mir-124-1e dre-mir-130-1a dre-mir-130-1c dre-mir-130-2a dre-mir-144 dre-mir-17-1a fru-mir-18-3 fru-mir-182-1 dre-mir-182 fru-mir-182-2 dre-mir-24-1 dre-mir-27-3a dre-mir-27-2a dre-mir-34-3b fru-mir-93-2b		3' GAACC-GUAAGUG-GCGCACGGAAUU 5' dre-mir-124-1e __ :||||.||.||.:.:.:|||||||:| __ 5' UUUGGCCAGUCUUGUAUGUGCCUUGA 3' ENSDART00000019184_P E:-23.91 S:106.000000 Loc:1077 Cons: 92.31%(fru)	3' GAACCGUAAGUGGCGCACGGAAUU 5' dre-mir-124-1e __ .|.||:.||||::||.||:.||:| __ 5' GUGGGUUUUCAUUGC-UGUGUUGA 3' ENSDART00000019184_P E:-19.780001 S:91.000000 Loc:334 Cons: 100.00%(fru)
dre-mir-20-2b	ENSDART00000026625_P	ENSDARG00000016610	SINFRUG00000149275		ENSDARG00000016610 4001 (4001 nt) [BICAUDAL C;] [Sterile alpha motif SAM:Sterile alpha motif SAM;]	2	40.35	197	SINFRUG00000149275 (dre-miR-20-2b)		dre-mir-106-b1 fru-mir-106-b2 dre-mir-20-2b dre-mir-20-2a fru-mir-93-2a fru-mir-93-1a		3' GAUGGACG-UGACACUCGUGAAAC 5' dre-mir-20-2b __ ||:||||:.|:||.|||.::|||. __ 5' CUGCCUGUGAUUGGGAGAGUUUUU 3' ENSDART00000026625_P E:-21.93 S:99.000000 Loc:2202 Cons: 70.83%(fru)	3' GAUGGACGUGACACUC-GUGAAAC 5' dre-mir-20-2b __ ||.|:||.|..|||:|.||:|||| __ 5' CUCCUUG-A--GUGGGACAUUUUG 3' ENSDART00000026625_P E:-18.42 S:98.000000 Loc:2021 Cons: 71.43%(fru)
dre-mir-20-2a	ENSDART00000026625_P	ENSDARG00000016610	SINFRUG00000149275		ENSDARG00000016610 4001 (4001 nt) [BICAUDAL C;] [Sterile alpha motif SAM:Sterile alpha motif SAM;]	2	40.35	197	SINFRUG00000149275 (dre-miR-20-2a)		dre-mir-106-b1 fru-mir-106-b2 dre-mir-20-2b dre-mir-20-2a fru-mir-93-2a fru-mir-93-1a		3' GAUGGACG-UGACACUCGUGAAAC 5' dre-mir-20-2a __ ||:||||:.|:||.|||.::|||. __ 5' CUGCCUGUGAUUGGGAGAGUUUUU 3' ENSDART00000026625_P E:-21.93 S:99.000000 Loc:2202 Cons: 70.83%(fru)	3' GAUGGACGUGACACUC-GUGAAAC 5' dre-mir-20-2a __ ||.|:||.|..|||:|.||:|||| __ 5' CUCCUUG-A--GUGGGACAUUUUG 3' ENSDART00000026625_P E:-18.42 S:98.000000 Loc:2021 Cons: 71.43%(fru)
fru-mir-29-3a	ENSDART00000014583_P	ENSDARG00000004790	SINFRUG00000153450		ENSDARG00000004790 4001 (4001 nt) [AMBIGUOUS;] []	2	36.91	197	SINFRUG00000153450 (fru-miR-29-3a)		fru-mir-29-3a fru-mir-29-1c dre-mir-29-1a		3' AUUGGCUAAAGUUUACCACGAUC 5' fru-mir-29-3a __ ..|:|.||||.||:|||||.||| __ 5' GUAUC-AUUUAAAGUGGUG-UAG 3' ENSDART00000014583_P E:-17.1 S:104.000000 Loc:1048 Cons: 71.43%(fru)	3' AUUGGCUAAAGUUUACCACGAUC 5' fru-mir-29-3a __ ||||:|.||||.|.||||.||:| __ 5' UAACUG-UUUC-AUUGGU-CUGG 3' ENSDART00000014583_P E:-19.809999 S:93.000000 Loc:1086 Cons: 75.00%(fru)
dre-mir-30e-1	ENSDART00000007347_P	ENSDARG00000004990	SINFRUG00000121642		ENSDARG00000004990 4001 (4001 nt) [UNKNOWN; UNKNOWN; UNKNOWN; UNKNOWN;] [Protein kinase:Protein kinase; Protein kinase C-terminal domain:Protein kinase C-terminal domain; PDZ/DHR/GLGF domain:PDZ/DHR/GLGF domain; Protein kinase:Protein kinase; Protein kinase C-terminal domain:Protein kinase C-terminal domain; PDZ/DHR/GLGF domain:PDZ/DHR/GLGF domain; Protein kinase C-terminal domain:Protein kinase …	2	39.51	197	SINFRUG00000121642 (fru-miR-30e-1)		dre-mir-30e-1 dre-mir-30e-2		3' AGGUCAGUUCCUACAAAUGU 5' dre-mir-30e-1 __ .:::|||||||.||||||.| __ 5' GUUGGUCAAGG-UGUUUAAA 3' ENSDART00000007347_P E:-18.68 S:99.000000 Loc:855 Cons: 73.68%(fru)	3' AGGUCAGUUCCU-ACAAAUGU 5' dre-mir-30e-1 __ .:.|||||||||.||.||||| __ 5' AUGAGUCAAGGACUG-UUACA 3' ENSDART00000007347_P E:-20.83 S:98.000000 Loc:330 Cons: 70.00%(fru)
dre-mir-30e-2	ENSDART00000007347_P	ENSDARG00000004990	SINFRUG00000121642		ENSDARG00000004990 4001 (4001 nt) [UNKNOWN; UNKNOWN; UNKNOWN; UNKNOWN;] [Protein kinase:Protein kinase; Protein kinase C-terminal domain:Protein kinase C-terminal domain; PDZ/DHR/GLGF domain:PDZ/DHR/GLGF domain; Protein kinase:Protein kinase; Protein kinase C-terminal domain:Protein kinase C-terminal domain; PDZ/DHR/GLGF domain:PDZ/DHR/GLGF domain; Protein kinase C-terminal domain:Protein kinase …	2	39.51	197	SINFRUG00000121642 (fru-miR-30e-2)		dre-mir-30e-1 dre-mir-30e-2		3' AGGUCAGUUCCUACAAAUGU 5' dre-mir-30e-2 __ .:::|||||||.||||||.| __ 5' GUUGGUCAAGG-UGUUUAAA 3' ENSDART00000007347_P E:-18.68 S:99.000000 Loc:855 Cons: 73.68%(fru)	3' AGGUCAGUUCCU-ACAAAUGU 5' dre-mir-30e-2 __ .:.|||||||||.||.||||| __ 5' AUGAGUCAAGGACUG-UUACA 3' ENSDART00000007347_P E:-20.83 S:98.000000 Loc:330 Cons: 70.00%(fru)
fru-mir-29-2c	ENSDART00000009879_P	ENSDARG00000014997	SINFRUG00000146180		ENSDARG00000014997 4001 (4001 nt) [RHO GUANINE NUCLEOTIDE EXCHANGE FACTOR 2;] [Protein kinase C, phorbol ester/diacylglycerol binding:Protein kinase C, phorbol ester/diacylglycerol binding; Pleckstrin-like:Pleckstrin-like; DH domain:DH domain;]	2	35.32	196	SINFRUG00000146180 (fru-miR-29-2c)		fru-mir-29-2c		3' UGUGACUAAAGUUUAC-CACGAUC 5' fru-mir-29-2c __ ..||||.|||||||||..||:.|| __ 5' UAACUGCUUUCAAAUGUCUGUAAG 3' ENSDART00000009879_P E:-17.66 S:98.000000 Loc:516 Cons: 70.83%(fru)	3' UGUGACUAAAGUUUAC-CACGAUC 5' fru-mir-29-2c __ ..||||.|||||||||..||:.|| __ 5' UAACUGCUUUCAAAUGUCUGUAAG 3' ENSDART00000009879_P E:-17.66 S:98.000000 Loc:1227 Cons: 70.83%(fru)
dre-mir-27-1a	ENSDART00000026858_P	ENSDARG00000003353	SINFRUG00000136804		ENSDARG00000003353 4001 (4001 nt) [MAGUK P55 SUBFAMILY MEMBER; MAGUK P55 SUBFAMILY MEMBER;] [SH3 domain:SH3 domain; PDZ/DHR/GLGF domain:PDZ/DHR/GLGF domain; L27 domain:L27 domain; SH3 domain:SH3 domain; PDZ/DHR/GLGF domain:PDZ/DHR/GLGF domain; L27 domain:L27 domain;]	2	38.64	196	SINFRUG00000136804 (fru-miR-27-1a)		dre-mir-27-1a		3' CGCCUUGAAUCGGUGACACUU 5' dre-mir-27-1a __ .:.|:|:||.||||:|||.|| __ 5' AUUGGAUUU-GCCAUUGUAAA 3' ENSDART00000026858_P E:-17.59 S:104.000000 Loc:786 Cons: 70.00%(fru)	3' CGCCUUGAAUC-GGUG-ACACUU 5' dre-mir-27-1a __ .|||.|:||.|.:|||.||||:| __ 5' UCGGCAUUUUGAUCACAUGUGGA 3' ENSDART00000026858_P E:-21.049999 S:92.000000 Loc:71 Cons: 73.91%(fru)
dre-mir-148-1a	ENSDART00000016377_P	ENSDARG00000014346	SINFRUG00000121526		ENSDARG00000014346 4001 (4001 nt) [O18 GENE;] []	2	37.49	196	SINFRUG00000121526 (fru-miR-148-1a)		dre-mir-148-1a		3' CGUUUCAAGACAUUACGUGACU 5' dre-mir-148-1a __ |||.|...||||.||||||||| __ 5' GCACA---CUGU-AUGCACUGA 3' ENSDART00000016377_P E:-20.48 S:104.000000 Loc:1415 Cons: 72.22%(fru)	3' CGUUUCAAGACAUUACGUGACU 5' dre-mir-148-1a __ .:|:..|.|||||:|.||:||| __ 5' UUAGUCUACUGUAGU-CAUUGA 3' ENSDART00000016377_P E:-17.01 S:92.000000 Loc:1208 Cons: 71.43%(fru)
dre-mir-130-2a	ENSDART00000019184_P	ENSDARG00000015407	SINFRUG00000154578		ENSDARG00000015407 4001 (4001 nt) [LEUCINE RICH REPEAT TRANSMEMBRANE PRECURSOR FIBRONECTIN DOMAIN CONTAINING LEUCINE RICH TRANSMEMBRANE;] [Fibronectin, type III:Fibronectin, type III; Leucine-rich repeat:Leucine-rich repeat; Cysteine-rich flanking region, N-terminal:Cysteine-rich flanking region, N-terminal; Cysteine-rich flanking region, C-terminal:Cysteine-rich flanking region, C-terminal;]	2	36.56	196	SINFRUG00000154578 (dre-miR-130-2a)		dre-mir-106-a1 dre-mir-124-1b dre-mir-124-1a dre-mir-124-1c dre-mir-124-1d dre-mir-124-1e dre-mir-130-1a dre-mir-130-1c dre-mir-130-2a dre-mir-144 dre-mir-17-1a fru-mir-18-3 fru-mir-182-1 dre-mir-182 fru-mir-182-2 dre-mir-24-1 dre-mir-27-3a dre-mir-27-2a dre-mir-34-3b fru-mir-93-2b		3' UACGGGAAAGUAAUAACGUGAC 5' dre-mir-130-2a __ :||..:|||||||:.||:::|| __ 5' GUGGGUUUUCAUUGCUGUGUUG 3' ENSDART00000019184_P E:-18.280001 S:103.000000 Loc:333 Cons: 100.00%(fru)	3' UACGGGAAA---GUAAUAACGUG-AC 5' dre-mir-130-2a __ |||||||||...||.|.|||:|:.|| __ 5' AUGCCCUUUGGCCAGUCUUGUAUGUG 3' ENSDART00000019184_P E:-18.280001 S:93.000000 Loc:1071 Cons: 84.62%(fru)
dre-mir-20-2a	ENSDART00000013932_P	ENSDARG00000004702	SINFRUG00000139126		ENSDARG00000004702 4001 (4001 nt) [UNKNOWN; UNKNOWN;] []	2	41.85	196	SINFRUG00000139126 (dre-miR-20-2a)		dre-mir-106-b1 fru-mir-106-b2 dre-mir-106-a1 dre-mir-17-1a fru-mir-17-1e dre-mir-17-1b dre-mir-17-1d dre-mir-17-1c dre-mir-18-1 dre-mir-18-3b dre-mir-18-2b fru-mir-18-1a fru-mir-18-1b dre-mir-18-2 dre-mir-18-3a fru-mir-18-3 dre-mir-20-1b dre-mir-20-2a dre-mir-20-1 dre-mir-20-2b fru-mir-33-1b fru-mir-33-1a fru-mir-33b fru-mir-93-2a fru-mir-93-1a fru-mir-93-2b fru-mir-93-1b		3' GAUGGACGUG-ACACUCGUGAAAC 5' dre-mir-20-2a __ |||.|||:||.|||..||||||.. __ 5' CUAGCUGUACUUGUAUGCACUUGU 3' ENSDART00000013932_P E:-23.530001 S:99.000000 Loc:410 Cons: 91.67%(fru)	3' GAUGGACG-UGACA--CUCGUGAAAC 5' dre-mir-20-2a __ |||..|||.|||.|..||||||||.| __ 5' CUA-AUGCAACUCUACGAGCACUUGG 3' ENSDART00000013932_P E:-18.32 S:97.000000 Loc:350 Cons: 88.00%(fru)
dre-mir-20-2b	ENSDART00000013932_P	ENSDARG00000004702	SINFRUG00000139126		ENSDARG00000004702 4001 (4001 nt) [UNKNOWN; UNKNOWN;] []	2	41.85	196	SINFRUG00000139126 (dre-miR-20-2b)		dre-mir-106-b1 fru-mir-106-b2 dre-mir-106-a1 dre-mir-17-1a fru-mir-17-1e dre-mir-17-1b dre-mir-17-1d dre-mir-17-1c dre-mir-18-1 dre-mir-18-3b dre-mir-18-2b fru-mir-18-1a fru-mir-18-1b dre-mir-18-2 dre-mir-18-3a fru-mir-18-3 dre-mir-20-1b dre-mir-20-2a dre-mir-20-1 dre-mir-20-2b fru-mir-33-1b fru-mir-33-1a fru-mir-33b fru-mir-93-2a fru-mir-93-1a fru-mir-93-2b fru-mir-93-1b		3' GAUGGACGUG-ACACUCGUGAAAC 5' dre-mir-20-2b __ |||.|||:||.|||..||||||.. __ 5' CUAGCUGUACUUGUAUGCACUUGU 3' ENSDART00000013932_P E:-23.530001 S:99.000000 Loc:410 Cons: 91.67%(fru)	3' GAUGGACG-UGACA--CUCGUGAAAC 5' dre-mir-20-2b __ |||..|||.|||.|..||||||||.| __ 5' CUA-AUGCAACUCUACGAGCACUUGG 3' ENSDART00000013932_P E:-18.32 S:97.000000 Loc:350 Cons: 88.00%(fru)
dre-mir-15-2a	ENSDART00000017892_P	ENSDARG00000018110	SINFRUG00000141586		ENSDARG00000018110 4001 (4001 nt) [SERINE/THREONINE KINASE PAK EC_2.7.1.- P21 ACTIVATED KINASE PAK PAK; SERINE/THREONINE KINASE PAK EC_2.7.1.- P21 ACTIVATED KINASE PAK PAK; SERINE/THREONINE KINASE PAK EC_2.7.1.- P21 ACTIVATED KINASE PAK PAK;] [Protein kinase:Protein kinase; PAK-box/P21-Rho-binding:PAK-box/P21-Rho-binding; Protein kinase:Protein kinase; PAK-box/P21-Rho-binding:PAK-box/P21-Rho-bind…	2	34.67	196	SINFRUG00000141586 (fru-miR-15-2a)		dre-mir-15-2a		3' AUGUUUGGUACUACACGACGAU 5' dre-mir-15-2a __ ||:||||.:|..||||:||:|. __ 5' UAUAAACAGUUUUGUGUUGUUU 3' ENSDART00000017892_P E:-17.08 S:105.000000 Loc:1472 Cons: 77.27%(fru)	3' AUGUUUGGUACUACACGACGAU 5' dre-mir-15-2a __ .|||||||...|||||:|.||. __ 5' CACAAACC---AUGUGUU-CUC 3' ENSDART00000017892_P E:-17.59 S:91.000000 Loc:277 Cons: 72.22%(fru)
dre-mir-96	ENSDART00000005230_P	ENSDARG00000012230	SINFRUG00000137393		ENSDARG00000012230 4001 (4001 nt) [ALPHA ACTININ F ACTIN CROSS LINKING;] [Calponin-like actin-binding:Calponin-like actin-binding; Spectrin repeat:Spectrin repeat;]	2	37.6	195	SINFRUG00000137393 (dre-miR-96)		dre-mir-96		3' UCGUUUUUACACGAUCACGGUUU 5' dre-mir-96 __ ||.|||:||||..|||.||||:| __ 5' AG-AAAGAUGUAAUAG-GCCAGA 3' ENSDART00000005230_P E:-19.4 S:98.000000 Loc:2646 Cons: 76.19%(fru)	3' UCGUUUUUACACGAUC-AC-GGUUU 5' dre-mir-96 __ .||||||:.|.|||:|.||.:|||| __ 5' UGCAAAAGAG-GCUGGCUGUUCAAA 3' ENSDART00000005230_P E:-18.200001 S:97.000000 Loc:1989 Cons: 70.83%(fru)
fru-mir-93-1a	ENSDART00000011539_P	ENSDARG00000009459	SINFRUG00000155618		ENSDARG00000009459 4001 (4001 nt) [PHOSPHATE/PHOSPHOENOLPYRUVATE TRANSLOCATOR;] []	2	38.29	195	SINFRUG00000155618 (fru-miR-93-1a)		fru-mir-106-b2 dre-mir-130-1b fru-mir-17-1e dre-mir-20-2a dre-mir-20-2b dre-mir-27-2a fru-mir-93-1a dre-mir-let7l-a dre-mir-let7l-b1 dre-mir-let7l-c1 fru-mir-let7l-c2 dre-mir-let7l-d1 fru-mir-let7l-d2		3' GAUGGACGUG-ACAUUCGUGAAA 5' fru-mir-93-1a __ :||.|||.||.|||..||||||| __ 5' UUA-CUGGACUUGUUCGCACUUU 3' ENSDART00000011539_P E:-19.74 S:101.000000 Loc:2362 Cons: 72.73%(fru)	3' GAUGGACGUGACAUUCGUGAAA 5' fru-mir-93-1a __ ||||||..|.|||::|||.||. __ 5' CUACCU--A-UGUGGGCAGUUC 3' ENSDART00000011539_P E:-18.549999 S:94.000000 Loc:1923 Cons: 78.95%(fru)
fru-mir-17-1e-as	ENSDART00000010806_P	ENSDARG00000009508	SINFRUG00000120843		ENSDARG00000009508 4001 (4001 nt) [NUCLEOLAR PHOSPHOPROTEIN P130 NUCLEOLAR 130 KDA 140 KDA NUCLEOLAR PHOSPHOPROTEIN NOPP140 NUCLEOLAR AND COILED BODY PHOSPHOPROTEIN 1; NUCLEOLAR PHOSPHOPROTEIN P130 NUCLEOLAR 130 KDA 140 KDA NUCLEOLAR PHOSPHOPROTEIN NOPP140 NUCLEOLAR AND COILED BODY PHOSPHOPROTEIN 1; NUCLEOLAR PHOSPHOPROTEIN P130 NUCLEOLAR 130 KDA 140 KDA NUCLEOLAR PHOSPHOPROTEIN NOPP140 NUCLEOLAR…	2	39.5	195	SINFRUG00000120843 (fru-miR-17-1e-as)		fru-mir-17-1e-as		3' UCUUCACG-AGUGUGACGUCA 5' fru-mir-17-1e-as __ .|||||||.|||:.|||.||| __ 5' UGAAGUGCGUCAUCCUGAAGU 3' ENSDART00000010806_P E:-21.059999 S:104.000000 Loc:150 Cons: 76.19%(fru)	3' UCUUCACG--AGUGUGACGUCA 5' fru-mir-17-1e-as __ |.::||||..||||||..|||| __ 5' AAGGGUGCUUUCACAC--CAGU 3' ENSDART00000010806_P E:-18.440001 S:91.000000 Loc:1080 Cons: 70.00%(fru)
dre-mir-20-2b	ENSDART00000020778_P	ENSDARG00000019522	SINFRUG00000140784		ENSDARG00000019522 4001 (4001 nt) [MEMBRANE RECEPTOR;] [Hly-III related proteins:Hly-III related proteins;]	2	38.53	195	SINFRUG00000140784 (dre-miR-20-2b)		dre-mir-124-1c dre-mir-124-1e dre-mir-124-1a dre-mir-124-1d dre-mir-124-1b dre-mir-17-1a dre-mir-20-2b dre-mir-20-2a fru-mir-93-1a fru-mir-93-2b		3' GAUGGACGUGACACUCGUGAAAC 5' dre-mir-20-2b __ :|||||...||||||.:|:|||| __ 5' UUACCU---CUGUGA-UAUUUUG 3' ENSDART00000020778_P E:-21.24 S:102.000000 Loc:1471 Cons: 73.68%(fru)	3' GAUG-GACGUGACACUCGUGAAAC 5' dre-mir-20-2b __ :|:|.||||.|.|||..||||||. __ 5' UUGCACUGC-CAGUGCACACUUUC 3' ENSDART00000020778_P E:-17.290001 S:93.000000 Loc:804 Cons: 73.91%(fru)
dre-mir-20-2a	ENSDART00000020778_P	ENSDARG00000019522	SINFRUG00000140784		ENSDARG00000019522 4001 (4001 nt) [MEMBRANE RECEPTOR;] [Hly-III related proteins:Hly-III related proteins;]	2	38.53	195	SINFRUG00000140784 (dre-miR-20-2a)		dre-mir-124-1c dre-mir-124-1e dre-mir-124-1a dre-mir-124-1d dre-mir-124-1b dre-mir-17-1a dre-mir-20-2b dre-mir-20-2a fru-mir-93-1a fru-mir-93-2b		3' GAUGGACGUGACACUCGUGAAAC 5' dre-mir-20-2a __ :|||||...||||||.:|:|||| __ 5' UUACCU---CUGUGA-UAUUUUG 3' ENSDART00000020778_P E:-21.24 S:102.000000 Loc:1471 Cons: 73.68%(fru)	3' GAUG-GACGUGACACUCGUGAAAC 5' dre-mir-20-2a __ :|:|.||||.|.|||..||||||. __ 5' UUGCACUGC-CAGUGCACACUUUC 3' ENSDART00000020778_P E:-17.290001 S:93.000000 Loc:804 Cons: 73.91%(fru)
dre-mir-122a	ENSDART00000008116_P	ENSDARG00000013814	SINFRUG00000154903		ENSDARG00000013814 4001 (4001 nt) [METABOTROPIC GLUTAMATE RECEPTOR PRECURSOR; METABOTROPIC GLUTAMATE RECEPTOR PRECURSOR;] [G-protein coupled receptors family 3 (Metabotropic glutamate receptor-like):G-protein coupled receptors family 3 (Metabotropic glutamate receptor-like); Metabotropic glutamate receptor:Metabotropic glutamate receptor; Metabotropic glutamate receptor 4:Metabotropic glutamate r…	2	38.96	194	SINFRUG00000154903 (fru-miR-122a)		dre-mir-122a		3' UGUUUGUGGUAACAGUGUGAGGU 5' dre-mir-122a __ |:|||.||||..|.|||||.||| __ 5' AUAAAAACCA--G-CACACACCA 3' ENSDART00000008116_P E:-19.48 S:97.000000 Loc:1451 Cons: 70.00%(fru)	3' UGUUUGUGGUAACAGUGUGAGGU 5' dre-mir-122a __ |:|||.||||..|.|||||.||| __ 5' AUAAAAACCA--G-CACACACCA 3' ENSDART00000008116_P E:-19.48 S:97.000000 Loc:1749 Cons: 70.00%(fru)
dre-mir-106-a1	ENSDART00000026503_P	ENSDARG00000009736	SINFRUG00000136422		ENSDARG00000009736 4001 (4001 nt) [TRANSCRIPTIONAL REPRESSOR YY1 YIN AND YANG 1 YY 1 DELTA TRANSCRIPTION FACTOR NF E1; TRANSCRIPTIONAL REPRESSOR YY1 YIN AND YANG 1 YY 1 DELTA TRANSCRIPTION FACTOR NF E1; TRANSCRIPTIONAL REPRESSOR YY1 YIN AND YANG 1 YY 1 DELTA TRANSCRIPTION FACTOR NF E1;] [Zn-finger, C2H2 type:Zn-finger, C2H2 type; Zn-finger, C2H2 type:Zn-finger, C2H2 type; Zn-finger, C2H2 type:Zn-…	2	46.49	194	SINFRUG00000136422 (fru-miR-106-a1)		dre-mir-106-a1 fru-mir-106-b2 dre-mir-106-c1 dre-mir-17-1b dre-mir-17-1d fru-mir-17-1e dre-mir-17-1c dre-mir-17-1a fru-mir-18-1b fru-mir-18-1a dre-mir-18-2b dre-mir-18-2 dre-mir-18-1 dre-mir-19-1d dre-mir-19-1b dre-mir-20-1b dre-mir-20-1 dre-mir-27-1a fru-mir-93-2b dre-mir-93		3' GAUGGACGUGACAUUCGUGAAAC 5' dre-mir-106-a1 __ :|||||||||....|||||||.| __ 5' UUACCUGCAC----AGCACUUCG 3' ENSDART00000026503_P E:-24.870001 S:103.000000 Loc:1184 Cons: 84.21%(fru)	3' GAUGGACGUGACAUUCGUGAAAC 5' dre-mir-106-a1 __ :|||||||:...|.|||||||.. __ 5' UUACCUGCG---U-AGCACUUAA 3' ENSDART00000026503_P E:-21.620001 S:91.000000 Loc:1376 Cons: 73.68%(fru)
dre-mir-17-1b	ENSDART00000026503_P	ENSDARG00000009736	SINFRUG00000136422		ENSDARG00000009736 4001 (4001 nt) [TRANSCRIPTIONAL REPRESSOR YY1 YIN AND YANG 1 YY 1 DELTA TRANSCRIPTION FACTOR NF E1; TRANSCRIPTIONAL REPRESSOR YY1 YIN AND YANG 1 YY 1 DELTA TRANSCRIPTION FACTOR NF E1; TRANSCRIPTIONAL REPRESSOR YY1 YIN AND YANG 1 YY 1 DELTA TRANSCRIPTION FACTOR NF E1;] [Zn-finger, C2H2 type:Zn-finger, C2H2 type; Zn-finger, C2H2 type:Zn-finger, C2H2 type; Zn-finger, C2H2 type:Zn-…	2	47.13	194	SINFRUG00000136422 (fru-miR-17-1b)		dre-mir-106-a1 fru-mir-106-b2 dre-mir-106-c1 dre-mir-17-1b dre-mir-17-1d fru-mir-17-1e dre-mir-17-1c dre-mir-17-1a fru-mir-18-1b fru-mir-18-1a dre-mir-18-2b dre-mir-18-2 dre-mir-18-1 dre-mir-19-1d dre-mir-19-1b dre-mir-20-1b dre-mir-20-1 dre-mir-27-1a fru-mir-93-2b dre-mir-93		3' UGAUGGACGUGACAUUCGUGAAAC 5' dre-mir-17-1b __ .:|||||||||....|||||||.| __ 5' UUUACCUGCAC----AGCACUUCG 3' ENSDART00000026503_P E:-25.190001 S:103.000000 Loc:1184 Cons: 85.00%(fru)	3' UGAUGGACGUGACAUUCGUGAAAC 5' dre-mir-17-1b __ .:|||||||:...|.|||||||.. __ 5' UUUACCUGCG---U-AGCACUUAA 3' ENSDART00000026503_P E:-21.940001 S:91.000000 Loc:1376 Cons: 75.00%(fru)
dre-mir-17-1d	ENSDART00000026503_P	ENSDARG00000009736	SINFRUG00000136422		ENSDARG00000009736 4001 (4001 nt) [TRANSCRIPTIONAL REPRESSOR YY1 YIN AND YANG 1 YY 1 DELTA TRANSCRIPTION FACTOR NF E1; TRANSCRIPTIONAL REPRESSOR YY1 YIN AND YANG 1 YY 1 DELTA TRANSCRIPTION FACTOR NF E1; TRANSCRIPTIONAL REPRESSOR YY1 YIN AND YANG 1 YY 1 DELTA TRANSCRIPTION FACTOR NF E1;] [Zn-finger, C2H2 type:Zn-finger, C2H2 type; Zn-finger, C2H2 type:Zn-finger, C2H2 type; Zn-finger, C2H2 type:Zn-…	2	46.84	194	SINFRUG00000136422 (fru-miR-17-1d)		dre-mir-106-a1 fru-mir-106-b2 dre-mir-106-c1 dre-mir-17-1b dre-mir-17-1d fru-mir-17-1e dre-mir-17-1c dre-mir-17-1a fru-mir-18-1b fru-mir-18-1a dre-mir-18-2b dre-mir-18-2 dre-mir-18-1 dre-mir-19-1d dre-mir-19-1b dre-mir-20-1b dre-mir-20-1 dre-mir-27-1a fru-mir-93-2b dre-mir-93		3' UGAUGGACGUGACACUCGUGAAAC 5' dre-mir-17-1d __ .:|||||||||....|||||||.| __ 5' UUUACCUGCAC----AGCACUUCG 3' ENSDART00000026503_P E:-25.190001 S:103.000000 Loc:1184 Cons: 85.00%(fru)	3' UGAUGGACGUGACACUCGUGAAAC 5' dre-mir-17-1d __ .:|||||||:...|.|||||||.. __ 5' UUUACCUGCG---U-AGCACUUAA 3' ENSDART00000026503_P E:-21.65 S:91.000000 Loc:1376 Cons: 75.00%(fru)
fru-mir-17-1e	ENSDART00000026503_P	ENSDARG00000009736	SINFRUG00000136422		ENSDARG00000009736 4001 (4001 nt) [TRANSCRIPTIONAL REPRESSOR YY1 YIN AND YANG 1 YY 1 DELTA TRANSCRIPTION FACTOR NF E1; TRANSCRIPTIONAL REPRESSOR YY1 YIN AND YANG 1 YY 1 DELTA TRANSCRIPTION FACTOR NF E1; TRANSCRIPTIONAL REPRESSOR YY1 YIN AND YANG 1 YY 1 DELTA TRANSCRIPTION FACTOR NF E1;] [Zn-finger, C2H2 type:Zn-finger, C2H2 type; Zn-finger, C2H2 type:Zn-finger, C2H2 type; Zn-finger, C2H2 type:Zn-…	2	46.36	194	SINFRUG00000136422 (fru-miR-17-1e)		dre-mir-106-a1 fru-mir-106-b2 dre-mir-106-c1 dre-mir-17-1b dre-mir-17-1d fru-mir-17-1e dre-mir-17-1c dre-mir-17-1a fru-mir-18-1b fru-mir-18-1a dre-mir-18-2b dre-mir-18-2 dre-mir-18-1 dre-mir-19-1d dre-mir-19-1b dre-mir-20-1b dre-mir-20-1 dre-mir-27-1a fru-mir-93-2b dre-mir-93		3' UGAUGGACGUGACAUUCGUGAAAU 5' fru-mir-17-1e __ .:|||||||||....|||||||.: __ 5' UUUACCUGCAC----AGCACUUCG 3' ENSDART00000026503_P E:-24.42 S:99.000000 Loc:1184 Cons: 85.00%(fru)	3' UGAUGGACGUGACAUUCGUGAAAU 5' fru-mir-17-1e __ .:|||||||:...|.|||||||.| __ 5' UUUACCUGCG---U-AGCACUUAA 3' ENSDART00000026503_P E:-21.940001 S:95.000000 Loc:1376 Cons: 75.00%(fru)
dre-mir-17-1c	ENSDART00000026503_P	ENSDARG00000009736	SINFRUG00000136422		ENSDARG00000009736 4001 (4001 nt) [TRANSCRIPTIONAL REPRESSOR YY1 YIN AND YANG 1 YY 1 DELTA TRANSCRIPTION FACTOR NF E1; TRANSCRIPTIONAL REPRESSOR YY1 YIN AND YANG 1 YY 1 DELTA TRANSCRIPTION FACTOR NF E1; TRANSCRIPTIONAL REPRESSOR YY1 YIN AND YANG 1 YY 1 DELTA TRANSCRIPTION FACTOR NF E1;] [Zn-finger, C2H2 type:Zn-finger, C2H2 type; Zn-finger, C2H2 type:Zn-finger, C2H2 type; Zn-finger, C2H2 type:Zn-…	2	46.36	194	SINFRUG00000136422 (fru-miR-17-1c)		dre-mir-106-a1 fru-mir-106-b2 dre-mir-106-c1 dre-mir-17-1b dre-mir-17-1d fru-mir-17-1e dre-mir-17-1c dre-mir-17-1a fru-mir-18-1b fru-mir-18-1a dre-mir-18-2b dre-mir-18-2 dre-mir-18-1 dre-mir-19-1d dre-mir-19-1b dre-mir-20-1b dre-mir-20-1 dre-mir-27-1a fru-mir-93-2b dre-mir-93		3' UGAUGGACGUGAUAUUCGUGAAAU 5' dre-mir-17-1c __ .:|||||||||....|||||||.: __ 5' UUUACCUGCAC----AGCACUUCG 3' ENSDART00000026503_P E:-24.42 S:99.000000 Loc:1184 Cons: 85.00%(fru)	3' UGAUGGACGUGAUAUUCGUGAAAU 5' dre-mir-17-1c __ .:|||||||:...|.|||||||.| __ 5' UUUACCUGCG---U-AGCACUUAA 3' ENSDART00000026503_P E:-21.940001 S:95.000000 Loc:1376 Cons: 75.00%(fru)
dre-mir-17-1a	ENSDART00000026503_P	ENSDARG00000009736	SINFRUG00000136422		ENSDARG00000009736 4001 (4001 nt) [TRANSCRIPTIONAL REPRESSOR YY1 YIN AND YANG 1 YY 1 DELTA TRANSCRIPTION FACTOR NF E1; TRANSCRIPTIONAL REPRESSOR YY1 YIN AND YANG 1 YY 1 DELTA TRANSCRIPTION FACTOR NF E1; TRANSCRIPTIONAL REPRESSOR YY1 YIN AND YANG 1 YY 1 DELTA TRANSCRIPTION FACTOR NF E1;] [Zn-finger, C2H2 type:Zn-finger, C2H2 type; Zn-finger, C2H2 type:Zn-finger, C2H2 type; Zn-finger, C2H2 type:Zn-…	2	47.13	194	SINFRUG00000136422 (fru-miR-17-1a)		dre-mir-106-a1 fru-mir-106-b2 dre-mir-106-c1 dre-mir-17-1b dre-mir-17-1d fru-mir-17-1e dre-mir-17-1c dre-mir-17-1a fru-mir-18-1b fru-mir-18-1a dre-mir-18-2b dre-mir-18-2 dre-mir-18-1 dre-mir-19-1d dre-mir-19-1b dre-mir-20-1b dre-mir-20-1 dre-mir-27-1a fru-mir-93-2b dre-mir-93		3' UGAUGGACGUGACAUUCGUGAAAC 5' dre-mir-17-1a __ .:|||||||||....|||||||.| __ 5' UUUACCUGCAC----AGCACUUCG 3' ENSDART00000026503_P E:-25.190001 S:103.000000 Loc:1184 Cons: 85.00%(fru)	3' UGAUGGACGUGACAUUCGUGAAAC 5' dre-mir-17-1a __ .:|||||||:...|.|||||||.. __ 5' UUUACCUGCG---U-AGCACUUAA 3' ENSDART00000026503_P E:-21.940001 S:91.000000 Loc:1376 Cons: 75.00%(fru)
dre-mir-20-1b	ENSDART00000026503_P	ENSDARG00000009736	SINFRUG00000136422		ENSDARG00000009736 4001 (4001 nt) [TRANSCRIPTIONAL REPRESSOR YY1 YIN AND YANG 1 YY 1 DELTA TRANSCRIPTION FACTOR NF E1; TRANSCRIPTIONAL REPRESSOR YY1 YIN AND YANG 1 YY 1 DELTA TRANSCRIPTION FACTOR NF E1; TRANSCRIPTIONAL REPRESSOR YY1 YIN AND YANG 1 YY 1 DELTA TRANSCRIPTION FACTOR NF E1;] [Zn-finger, C2H2 type:Zn-finger, C2H2 type; Zn-finger, C2H2 type:Zn-finger, C2H2 type; Zn-finger, C2H2 type:Zn-…	2	45.72	194	SINFRUG00000136422 (fru-miR-20-1b)		dre-mir-106-a1 fru-mir-106-b2 dre-mir-106-c1 dre-mir-17-1b dre-mir-17-1d fru-mir-17-1e dre-mir-17-1c dre-mir-17-1a fru-mir-18-1b fru-mir-18-1a dre-mir-18-2b dre-mir-18-2 dre-mir-18-1 dre-mir-19-1d dre-mir-19-1b dre-mir-20-1b dre-mir-20-1 dre-mir-27-1a fru-mir-93-2b dre-mir-93		3' GAUGGACGUGAUAUUCGUGAAAU 5' dre-mir-20-1b __ :|||||||||....|||||||.: __ 5' UUACCUGCAC----AGCACUUCG 3' ENSDART00000026503_P E:-24.1 S:99.000000 Loc:1184 Cons: 84.21%(fru)	3' GAUGGACGUGAUAUUCGUGAAAU 5' dre-mir-20-1b __ :|||||||:...|.|||||||.| __ 5' UUACCUGCG---U-AGCACUUAA 3' ENSDART00000026503_P E:-21.620001 S:95.000000 Loc:1376 Cons: 73.68%(fru)
dre-mir-20-1	ENSDART00000026503_P	ENSDARG00000009736	SINFRUG00000136422		ENSDARG00000009736 4001 (4001 nt) [TRANSCRIPTIONAL REPRESSOR YY1 YIN AND YANG 1 YY 1 DELTA TRANSCRIPTION FACTOR NF E1; TRANSCRIPTIONAL REPRESSOR YY1 YIN AND YANG 1 YY 1 DELTA TRANSCRIPTION FACTOR NF E1; TRANSCRIPTIONAL REPRESSOR YY1 YIN AND YANG 1 YY 1 DELTA TRANSCRIPTION FACTOR NF E1;] [Zn-finger, C2H2 type:Zn-finger, C2H2 type; Zn-finger, C2H2 type:Zn-finger, C2H2 type; Zn-finger, C2H2 type:Zn-…	2	45.72	194	SINFRUG00000136422 (fru-miR-20-1)		dre-mir-106-a1 fru-mir-106-b2 dre-mir-106-c1 dre-mir-17-1b dre-mir-17-1d fru-mir-17-1e dre-mir-17-1c dre-mir-17-1a fru-mir-18-1b fru-mir-18-1a dre-mir-18-2b dre-mir-18-2 dre-mir-18-1 dre-mir-19-1d dre-mir-19-1b dre-mir-20-1b dre-mir-20-1 dre-mir-27-1a fru-mir-93-2b dre-mir-93		3' GAUGGACGUGAUAUUCGUGAAAU 5' dre-mir-20-1 __ :|||||||||....|||||||.: __ 5' UUACCUGCAC----AGCACUUCG 3' ENSDART00000026503_P E:-24.1 S:99.000000 Loc:1184 Cons: 84.21%(fru)	3' GAUGGACGUGAUAUUCGUGAAAU 5' dre-mir-20-1 __ :|||||||:...|.|||||||.| __ 5' UUACCUGCG---U-AGCACUUAA 3' ENSDART00000026503_P E:-21.620001 S:95.000000 Loc:1376 Cons: 73.68%(fru)
fru-mir-93-2b	ENSDART00000026503_P	ENSDARG00000009736	SINFRUG00000136422		ENSDARG00000009736 4001 (4001 nt) [TRANSCRIPTIONAL REPRESSOR YY1 YIN AND YANG 1 YY 1 DELTA TRANSCRIPTION FACTOR NF E1; TRANSCRIPTIONAL REPRESSOR YY1 YIN AND YANG 1 YY 1 DELTA TRANSCRIPTION FACTOR NF E1; TRANSCRIPTIONAL REPRESSOR YY1 YIN AND YANG 1 YY 1 DELTA TRANSCRIPTION FACTOR NF E1;] [Zn-finger, C2H2 type:Zn-finger, C2H2 type; Zn-finger, C2H2 type:Zn-finger, C2H2 type; Zn-finger, C2H2 type:Zn-…	2	46.49	194	SINFRUG00000136422 (fru-miR-93-2b)		dre-mir-106-a1 fru-mir-106-b2 dre-mir-106-c1 dre-mir-17-1b dre-mir-17-1d fru-mir-17-1e dre-mir-17-1c dre-mir-17-1a fru-mir-18-1b fru-mir-18-1a dre-mir-18-2b dre-mir-18-2 dre-mir-18-1 dre-mir-19-1d dre-mir-19-1b dre-mir-20-1b dre-mir-20-1 dre-mir-27-1a fru-mir-93-2b dre-mir-93		3' GAUGGACGUGACAUUCGUGAAAC 5' fru-mir-93-2b __ :|||||||||....|||||||.| __ 5' UUACCUGCAC----AGCACUUCG 3' ENSDART00000026503_P E:-24.870001 S:103.000000 Loc:1184 Cons: 84.21%(fru)	3' GAUGGACGUGACAUUCGUGAAAC 5' fru-mir-93-2b __ :|||||||:...|.|||||||.. __ 5' UUACCUGCG---U-AGCACUUAA 3' ENSDART00000026503_P E:-21.620001 S:91.000000 Loc:1376 Cons: 73.68%(fru)
dre-mir-17-1d	ENSDART00000026825_P	ENSDARG00000019890	SINFRUG00000120372		ENSDARG00000019890 4001 (4001 nt) [AMBIGUOUS;] []	2	41.97	194	SINFRUG00000120372 (fru-miR-17-1d)		dre-mir-15-3 dre-mir-17-1b dre-mir-17-1d dre-mir-199-1a dre-mir-199-1b dre-mir-199-1c dre-mir-20-2a dre-mir-20-2b dre-mir-200a-1a fru-mir-30b-1 dre-mir-34-3b		3' UGAUGGACGUGACACUCGUGAAAC 5' dre-mir-17-1d __ |||:|:|.|.|||||..||||||. __ 5' ACUGCUUCCUCUGUG-CCACUUUU 3' ENSDART00000026825_P E:-21.42 S:101.000000 Loc:2514 Cons: 78.26%(fru)	3' UGA-UGGACGUGACACUCGU-GA--AAC 5' dre-mir-17-1d __ .||.|||||:|...||:|||.||..||| __ 5' CCUCACCUGUAGGCUGGGCAUCUCCUUG 3' ENSDART00000026825_P E:-20.549999 S:93.000000 Loc:2486 Cons: 78.57%(fru)
fru-mir-33-1a	ENSDART00000018363_P	ENSDARG00000017347	SINFRUG00000138494		SOLUTE CARRIER FAMILY 3, MEMBER 2. [Source:RefSeq;Acc:NM_131601] ENSDARG00000017347 (1) (103407 103407 121996 121996 152761) 4001 (4001 nt) [4F2 CELL SURFACE ANTIGEN HEAVY CHAIN 4F2HC; 4F2 CELL SURFACE ANTIGEN HEAVY CHAIN 4F2HC; 4F2 CELL SURFACE ANTIGEN HEAVY CHAIN 4F2HC; 4F2 CELL SURFACE ANTIGEN HEAVY CHAIN 4F2HC; 4F2 CELL SURFACE ANTIGEN HEAVY CHAIN 4F2HC; 4F2 CELL SURFACE ANTIGEN HEAVY CHAIN 4…	2	38.96	194	SINFRUG00000138494 (fru-miR-33-1a)		fru-mir-33-1a fru-mir-33b fru-mir-33-1b	GO:0004556->alpha-amylase activity GO:0005975->carbohydrate metabolism	3' GUUACGUUGAUGUUACGUGGU 5' fru-mir-33-1a __ .|||..|||||||:|||.:|| __ 5' AAAU--AACUACAGUGC-UCA 3' ENSDART00000018363_P E:-19.48 S:97.000000 Loc:690 Cons: 72.22%(fru)	3' GUUACGUUGAUGUUACGUGGU 5' fru-mir-33-1a __ .|||..|||||||:|||.:|| __ 5' AAAU--AACUACAGUGC-UCA 3' ENSDART00000018363_P E:-19.48 S:97.000000 Loc:1250 Cons: 72.22%(fru)
fru-mir-33b	ENSDART00000018363_P	ENSDARG00000017347	SINFRUG00000138494		SOLUTE CARRIER FAMILY 3, MEMBER 2. [Source:RefSeq;Acc:NM_131601] ENSDARG00000017347 (1) (103407 103407 121996 121996 152761) 4001 (4001 nt) [4F2 CELL SURFACE ANTIGEN HEAVY CHAIN 4F2HC; 4F2 CELL SURFACE ANTIGEN HEAVY CHAIN 4F2HC; 4F2 CELL SURFACE ANTIGEN HEAVY CHAIN 4F2HC; 4F2 CELL SURFACE ANTIGEN HEAVY CHAIN 4F2HC; 4F2 CELL SURFACE ANTIGEN HEAVY CHAIN 4F2HC; 4F2 CELL SURFACE ANTIGEN HEAVY CHAIN 4…	2	38.96	194	SINFRUG00000138494 (fru-miR-33b)		fru-mir-33-1a fru-mir-33b fru-mir-33-1b	GO:0004556->alpha-amylase activity GO:0005975->carbohydrate metabolism	3' GUUACGUUGAUGUUACGUGGU 5' fru-mir-33b __ .|||..|||||||:|||.:|| __ 5' AAAU--AACUACAGUGC-UCA 3' ENSDART00000018363_P E:-19.48 S:97.000000 Loc:690 Cons: 72.22%(fru)	3' GUUACGUUGAUGUUACGUGGU 5' fru-mir-33b __ .|||..|||||||:|||.:|| __ 5' AAAU--AACUACAGUGC-UCA 3' ENSDART00000018363_P E:-19.48 S:97.000000 Loc:1250 Cons: 72.22%(fru)
fru-mir-33-1b	ENSDART00000018363_P	ENSDARG00000017347	SINFRUG00000138494		SOLUTE CARRIER FAMILY 3, MEMBER 2. [Source:RefSeq;Acc:NM_131601] ENSDARG00000017347 (1) (103407 103407 121996 121996 152761) 4001 (4001 nt) [4F2 CELL SURFACE ANTIGEN HEAVY CHAIN 4F2HC; 4F2 CELL SURFACE ANTIGEN HEAVY CHAIN 4F2HC; 4F2 CELL SURFACE ANTIGEN HEAVY CHAIN 4F2HC; 4F2 CELL SURFACE ANTIGEN HEAVY CHAIN 4F2HC; 4F2 CELL SURFACE ANTIGEN HEAVY CHAIN 4F2HC; 4F2 CELL SURFACE ANTIGEN HEAVY CHAIN 4…	2	38.96	194	SINFRUG00000138494 (fru-miR-33-1b)		fru-mir-33-1a fru-mir-33b fru-mir-33-1b	GO:0004556->alpha-amylase activity GO:0005975->carbohydrate metabolism	3' GUUACGUUGAUGUUACGUGGU 5' fru-mir-33-1b __ .|||..|||||||:|||.:|| __ 5' AAAU--AACUACAGUGC-UCA 3' ENSDART00000018363_P E:-19.48 S:97.000000 Loc:690 Cons: 72.22%(fru)	3' GUUACGUUGAUGUUACGUGGU 5' fru-mir-33-1b __ .|||..|||||||:|||.:|| __ 5' AAAU--AACUACAGUGC-UCA 3' ENSDART00000018363_P E:-19.48 S:97.000000 Loc:1250 Cons: 72.22%(fru)
fru-mir-24-3	ENSDART00000008419_P	ENSDARG00000012952	SINFRUG00000135796		ENSDARG00000012952 4001 (4001 nt) [AMBIGUOUS; AMBIGUOUS;] []	2	45.53	194	SINFRUG00000135796 (fru-miR-24-3)		fru-mir-24-3 dre-mir-24-1 dre-mir-92-1 dre-mir-92-1b fru-mir-92-1a		3' AACAAGGACGACCUGACUCGGU 5' fru-mir-24-3 __ ..||||:|||.||||..:|||| __ 5' GCGUUCUUGCAGGAC--GGCCA 3' ENSDART00000008419_P E:-25.43 S:98.000000 Loc:1013 Cons: 75.00%(fru)	3' AACAAGGAC-GAC--CUGACUCGGU 5' fru-mir-24-3 __ .|||||.||.|||..|||||.||:: __ 5' AUGUUCAUGUCUGUUGACUGUGCUG 3' ENSDART00000008419_P E:-20.1 S:96.000000 Loc:1102 Cons: 72.00%(fru)
dre-mir-196-1d	ENSDART00000009064_P	ENSDARG00000016939	SINFRUG00000146172		ENSDARG00000016939 4001 (4001 nt) [INTEGRIN BETA PRECURSOR;] [Integrin, beta chain:Integrin, beta chain; EGF-like domain:EGF-like domain;]	2	39.5	194	SINFRUG00000146172 (dre-miR-196-1d)		dre-mir-196-1d		3' GGUUGUUGAACUUUGAUGGAU 5' dre-mir-196-1d __ |.|||:::|||.|::|:|||| __ 5' CAAACGGUUUG-AGUUGCCUA 3' ENSDART00000009064_P E:-20.25 S:99.000000 Loc:888 Cons: 70.00%(fru)	3' GGUUGUUGAACUUUGAUGGAU 5' dre-mir-196-1d __ |.|||:::|||.|::|||||. __ 5' CAAACGGUUUG-AGUUACCUU 3' ENSDART00000009064_P E:-19.25 S:95.000000 Loc:1064 Cons: 75.00%(fru)
dre-mir-25	ENSDART00000026520_P	ENSDARG00000003880	SINFRUG00000136706		ENSDARG00000003880 4001 (4001 nt) [ANTHRAX TOXIN RECEPTOR 1 PRECURSOR TUMOR ENDOTHELIAL MARKER 8;] []	2	37.99	194	SINFRUG00000136706 (fru-miR-25)		dre-mir-183 fru-mir-183-1 fru-mir-183-2 dre-mir-25 dre-mir-31 dre-mir-34-2b dre-mir-34-3b dre-mir-34-3a dre-mir-92-1 dre-mir-92-1b fru-mir-92-1a		3' AGUCUGGCUCUGUUCACGUUAC 5' dre-mir-25 __ ..:|||:.:.|||:|||:||.| __ 5' GAGGACUCGUACAGGUGUAAGG 3' ENSDART00000026520_P E:-19.93 S:102.000000 Loc:1321 Cons: 95.45%(fru)	3' AGUCUGGCUCUGUUCACGUUAC 5' dre-mir-25 __ ..:|::.||.|||:.||||.|| __ 5' GAGGGUGGACACAGCUGCACUG 3' ENSDART00000026520_P E:-18.059999 S:92.000000 Loc:1517 Cons: 86.36%(fru)
dre-mir-20-2b	ENSDART00000022810_P	ENSDARG00000009657	SINFRUG00000154424		ENSDARG00000009657 4001 (4001 nt) [CIRCULATING CATHODIC ANTIGEN CCA; CIRCULATING CATHODIC ANTIGEN CCA;] []	2	41.16	194	SINFRUG00000154424 (dre-miR-20-2b)		dre-mir-106-a1 dre-mir-139 dre-mir-15-1b dre-mir-15-1a dre-mir-17-1c dre-mir-17-1a dre-mir-20-2b dre-mir-20-2a fru-mir-93-2b		3' GAUGGACGUGACACUCGUGAAAC 5' dre-mir-20-2b __ :||||||.||.|.|||.|||||| __ 5' UUACCUGAACAG-GAG-ACUUUG 3' ENSDART00000022810_P E:-22.309999 S:99.000000 Loc:657 Cons: 76.19%(fru)	3' GA-UGGACGUGACACUCGUGAAAC 5' dre-mir-20-2b __ ||.|.|.|:||||.|||.|:|||| __ 5' CUGAACAGUACUGAGAG-AUUUUG 3' ENSDART00000022810_P E:-18.85 S:95.000000 Loc:1524 Cons: 73.91%(fru)
dre-mir-20-2a	ENSDART00000022810_P	ENSDARG00000009657	SINFRUG00000154424		ENSDARG00000009657 4001 (4001 nt) [CIRCULATING CATHODIC ANTIGEN CCA; CIRCULATING CATHODIC ANTIGEN CCA;] []	2	41.16	194	SINFRUG00000154424 (dre-miR-20-2a)		dre-mir-106-a1 dre-mir-139 dre-mir-15-1b dre-mir-15-1a dre-mir-17-1c dre-mir-17-1a dre-mir-20-2b dre-mir-20-2a fru-mir-93-2b		3' GAUGGACGUGACACUCGUGAAAC 5' dre-mir-20-2a __ :||||||.||.|.|||.|||||| __ 5' UUACCUGAACAG-GAG-ACUUUG 3' ENSDART00000022810_P E:-22.309999 S:99.000000 Loc:657 Cons: 76.19%(fru)	3' GA-UGGACGUGACACUCGUGAAAC 5' dre-mir-20-2a __ ||.|.|.|:||||.|||.|:|||| __ 5' CUGAACAGUACUGAGAG-AUUUUG 3' ENSDART00000022810_P E:-18.85 S:95.000000 Loc:1524 Cons: 73.91%(fru)
dre-mir-184	ENSDART00000005871_P	ENSDARG00000008248	SINFRUG00000155280		ENSDARG00000008248 4001 (4001 nt) [AMBIGUOUS;] []	2	40.67	193	SINFRUG00000155280 (dre-miR-184)		dre-mir-184		3' CGGGAAUAGUCAAGAGGCAGGU 5' dre-mir-184 __ .:::||:|.|||.||.:||||| __ 5' AUUUUUGUGAGUGCUGUGUCCA 3' ENSDART00000005871_P E:-22.99 S:102.000000 Loc:750 Cons: 81.82%(fru)	3' CGGGAAUAGUCAAGAGGCAGGU 5' dre-mir-184 __ .:::||.|.|||.:|.:||||| __ 5' AUUUUUUUGAGUCUUGUGUCCA 3' ENSDART00000005871_P E:-17.68 S:91.000000 Loc:513 Cons: 72.73%(fru)
dre-mir-27-3a	ENSDART00000003081_P	ENSDARG00000010815	SINFRUG00000128183		ENSDARG00000010815 4001 (4001 nt) [RECEPTOR PRECURSOR;] [G-protein coupled receptors family 2 (secretin-like):G-protein coupled receptors family 2 (secretin-like);]	2	36.23	193	SINFRUG00000128183 (fru-miR-27-3a)		dre-mir-137-1a dre-mir-27-3a		3' UGACUUGAAUCGGUGACACUU 5' dre-mir-27-3a __ .|||..:||||.||:|||||| __ 5' UCUG--UUUAG-CAUUGUGAA 3' ENSDART00000003081_P E:-19.07 S:100.000000 Loc:993 Cons: 72.22%(fru)	3' UGAC-UUGAAUCGGUGACACUU 5' dre-mir-27-3a __ :|||.|||.||.:|||||.||| __ 5' GCUGCAACCUA-UCACUGGGAA 3' ENSDART00000003081_P E:-17.16 S:93.000000 Loc:1643 Cons: 71.43%(fru)
dre-mir-31	ENSDART00000024602_P	ENSDARG00000010069	SINFRUG00000138281		ENSDARG00000010069 4001 (4001 nt) [AMBIGUOUS;] []	2	39.33	193	SINFRUG00000138281 (dre-miR-31)		dre-mir-31		3' GUCGAUACGGUUGUAGAACGGU 5' dre-mir-31 __ .|||||.|||..:||.|||||| __ 5' GAGCUA-GCC--UAUAUUGCCA 3' ENSDART00000024602_P E:-20.16 S:98.000000 Loc:1808 Cons: 73.68%(fru)	3' GUCGAUACGGUUGUAGAACGGU 5' dre-mir-31 __ .:||||.|||..:||.|||||| __ 5' AGGCUA-GCC--UAUAUUGCCA 3' ENSDART00000024602_P E:-19.17 S:95.000000 Loc:1868 Cons: 78.95%(fru)
dre-mir-1-2b	ENSDART00000022826_P	ENSDARG00000019255	SINFRUG00000153746		ENSDARG00000019255 4001 (4001 nt) [AMBIGUOUS;] []	2	40.1	193	SINFRUG00000153746 (dre-miR-1-2b)		dre-mir-1-2b dre-mir-1-2c dre-mir-1-2a dre-mir-31		3' GGUGUGUGAAG-GAAUG---UAAGGU 5' dre-mir-1-2b __ .||||.|:|||.:|||:...|||||| __ 5' GCACA-AUUUCUUUUAUAGCAUUCCA 3' ENSDART00000022826_P E:-21.74 S:100.000000 Loc:2243 Cons: 72.00%(fru)	3' GGUGUGUGA-AGGAAUGUAAGGU 5' dre-mir-1-2b __ ||||.||:|.||:|||..||||. __ 5' CCAC-CAUUAUCUUUAGUUUCCU 3' ENSDART00000022826_P E:-18.360001 S:93.000000 Loc:2536 Cons: 72.73%(fru)
dre-mir-1-2c	ENSDART00000022826_P	ENSDARG00000019255	SINFRUG00000153746		ENSDARG00000019255 4001 (4001 nt) [AMBIGUOUS;] []	2	40.1	193	SINFRUG00000153746 (dre-miR-1-2c)		dre-mir-1-2b dre-mir-1-2c dre-mir-1-2a dre-mir-31		3' GGUGUGUGAAG-GAAUG---UAAGGU 5' dre-mir-1-2c __ .||||.|:|||.:|||:...|||||| __ 5' GCACA-AUUUCUUUUAUAGCAUUCCA 3' ENSDART00000022826_P E:-21.74 S:100.000000 Loc:2243 Cons: 72.00%(fru)	3' GGUGUGUGA-AGGAAUGUAAGGU 5' dre-mir-1-2c __ ||||.||:|.||:|||..||||. __ 5' CCAC-CAUUAUCUUUAGUUUCCU 3' ENSDART00000022826_P E:-18.360001 S:93.000000 Loc:2536 Cons: 72.73%(fru)
dre-mir-let7l-a	ENSDART00000027896_P	ENSDARG00000005732	SINFRUG00000124768		ENSDARG00000005732 1573 (1573 nt) [UNKNOWN;] []	2	36.25	193	SINFRUG00000124768 (dre-miR-let7l-a)		dre-mir-let7l-a dre-mir-let7l-b1 dre-mir-let7l-c1 fru-mir-let7l-c2 dre-mir-let7l-d1 fru-mir-let7l-d2		3' UUGAUAUGUUGGAUGAUGGAGU 5' dre-mir-let7l-a __ :|:|:||.|..||:||:|||:. __ 5' GAUUGUA-AUGCUGCUGCCUUU 3' ENSDART00000027896_P E:-18.32 S:99.000000 Loc:575 Cons: 71.43%(fru)	3' UUGAUAUGUUGGAUGAUGGAGU 5' dre-mir-let7l-a __ .|||.|:||.:.|:||:|||.| __ 5' CACUCUGCAUUAUGCUGCCUGA 3' ENSDART00000027896_P E:-17.93 S:94.000000 Loc:793 Cons: 72.73%(fru)
dre-mir-let7l-b1	ENSDART00000027896_P	ENSDARG00000005732	SINFRUG00000124768		ENSDARG00000005732 1573 (1573 nt) [UNKNOWN;] []	2	36.25	193	SINFRUG00000124768 (dre-miR-let7l-b1)		dre-mir-let7l-a dre-mir-let7l-b1 dre-mir-let7l-c1 fru-mir-let7l-c2 dre-mir-let7l-d1 fru-mir-let7l-d2		3' UUGAUAUGUUGGAUGAUGGAGU 5' dre-mir-let7l-b1 __ :|:|:||.|..||:||:|||:. __ 5' GAUUGUA-AUGCUGCUGCCUUU 3' ENSDART00000027896_P E:-18.32 S:99.000000 Loc:575 Cons: 71.43%(fru)	3' UUGAUAUGUUGGAUGAUGGAGU 5' dre-mir-let7l-b1 __ .|||.|:||.:.|:||:|||.| __ 5' CACUCUGCAUUAUGCUGCCUGA 3' ENSDART00000027896_P E:-17.93 S:94.000000 Loc:793 Cons: 72.73%(fru)
dre-mir-let7l-c1	ENSDART00000027896_P	ENSDARG00000005732	SINFRUG00000124768		ENSDARG00000005732 1573 (1573 nt) [UNKNOWN;] []	2	36.25	193	SINFRUG00000124768 (fru-miR-let7l-c1)		dre-mir-let7l-a dre-mir-let7l-b1 dre-mir-let7l-c1 fru-mir-let7l-c2 dre-mir-let7l-d1 fru-mir-let7l-d2		3' UUGAUAUGUUGGAUGAUGGAGU 5' dre-mir-let7l-c1 __ :|:|:||.|..||:||:|||:. __ 5' GAUUGUA-AUGCUGCUGCCUUU 3' ENSDART00000027896_P E:-18.32 S:99.000000 Loc:575 Cons: 71.43%(fru)	3' UUGAUAUGUUGGAUGAUGGAGU 5' dre-mir-let7l-c1 __ .|||.|:||.:.|:||:|||.| __ 5' CACUCUGCAUUAUGCUGCCUGA 3' ENSDART00000027896_P E:-17.93 S:94.000000 Loc:793 Cons: 72.73%(fru)
fru-mir-let7l-c2	ENSDART00000027896_P	ENSDARG00000005732	SINFRUG00000124768		ENSDARG00000005732 1573 (1573 nt) [UNKNOWN;] []	2	36.25	193	SINFRUG00000124768 (fru-miR-let7l-c2)		dre-mir-let7l-a dre-mir-let7l-b1 dre-mir-let7l-c1 fru-mir-let7l-c2 dre-mir-let7l-d1 fru-mir-let7l-d2		3' UUGAUAUGUUGGAUGAUGGAGU 5' fru-mir-let7l-c2 __ :|:|:||.|..||:||:|||:. __ 5' GAUUGUA-AUGCUGCUGCCUUU 3' ENSDART00000027896_P E:-18.32 S:99.000000 Loc:575 Cons: 71.43%(fru)	3' UUGAUAUGUUGGAUGAUGGAGU 5' fru-mir-let7l-c2 __ .|||.|:||.:.|:||:|||.| __ 5' CACUCUGCAUUAUGCUGCCUGA 3' ENSDART00000027896_P E:-17.93 S:94.000000 Loc:793 Cons: 72.73%(fru)
dre-mir-let7l-d1	ENSDART00000027896_P	ENSDARG00000005732	SINFRUG00000124768		ENSDARG00000005732 1573 (1573 nt) [UNKNOWN;] []	2	36.25	193	SINFRUG00000124768 (fru-miR-let7l-d1)		dre-mir-let7l-a dre-mir-let7l-b1 dre-mir-let7l-c1 fru-mir-let7l-c2 dre-mir-let7l-d1 fru-mir-let7l-d2		3' UUGAUAUGUUGGAUGAUGGAGU 5' dre-mir-let7l-d1 __ :|:|:||.|..||:||:|||:. __ 5' GAUUGUA-AUGCUGCUGCCUUU 3' ENSDART00000027896_P E:-18.32 S:99.000000 Loc:575 Cons: 71.43%(fru)	3' UUGAUAUGUUGGAUGAUGGAGU 5' dre-mir-let7l-d1 __ .|||.|:||.:.|:||:|||.| __ 5' CACUCUGCAUUAUGCUGCCUGA 3' ENSDART00000027896_P E:-17.93 S:94.000000 Loc:793 Cons: 72.73%(fru)
fru-mir-let7l-d2	ENSDART00000027896_P	ENSDARG00000005732	SINFRUG00000124768		ENSDARG00000005732 1573 (1573 nt) [UNKNOWN;] []	2	36.25	193	SINFRUG00000124768 (fru-miR-let7l-d2)		dre-mir-let7l-a dre-mir-let7l-b1 dre-mir-let7l-c1 fru-mir-let7l-c2 dre-mir-let7l-d1 fru-mir-let7l-d2		3' UUGAUAUGUUGGAUGAUGGAGU 5' fru-mir-let7l-d2 __ :|:|:||.|..||:||:|||:. __ 5' GAUUGUA-AUGCUGCUGCCUUU 3' ENSDART00000027896_P E:-18.32 S:99.000000 Loc:575 Cons: 71.43%(fru)	3' UUGAUAUGUUGGAUGAUGGAGU 5' fru-mir-let7l-d2 __ .|||.|:||.:.|:||:|||.| __ 5' CACUCUGCAUUAUGCUGCCUGA 3' ENSDART00000027896_P E:-17.93 S:94.000000 Loc:793 Cons: 72.73%(fru)
fru-mir-304	ENSDART00000010507_P	ENSDARG00000011434	SINFRUG00000123899		ENSDARG00000011434 4001 (4001 nt) [PROSTAGLANDIN E2 RECEPTOR EP4 SUBTYPE PROSTANOID EP4 RECEPTOR PGE RECEPTOR SUBTYPE;] [Prostacyclin (prostanoid IP) receptor:Prostacyclin (prostanoid IP) receptor; Rhodopsin-like GPCR superfamily:Rhodopsin-like GPCR superfamily; Thromboxane receptor:Thromboxane receptor; Prostanoid EP2 receptor:Prostanoid EP2 receptor;]	2	44.21	193	SINFRUG00000123899 (fru-miR-304)		fru-mir-304 fru-mir-93-1b		3' GAGUGUAAAUGUGUG-ACUAUGCU 5' fru-mir-304 __ :.||||||||||:||.|||.|||. __ 5' UACACAUUUACAUACAUGA-ACGU 3' ENSDART00000010507_P E:-26.33 S:102.000000 Loc:2509 Cons: 73.91%(fru)	3' GAGUGUAAAUGUGUGACUAUGCU 5' fru-mir-304 __ :|.:||||.|:||||||...||| __ 5' UUAGCAUUAAUACACUG---CGA 3' ENSDART00000010507_P E:-17.879999 S:91.000000 Loc:2437 Cons: 70.00%(fru)
dre-mir-184	ENSDART00000004890_P	ENSDARG00000013626	SINFRUG00000149143		ENSDARG00000013626 4001 (4001 nt) [AMBIGUOUS; AMBIGUOUS;] []	2	39.09	192	SINFRUG00000149143 (dre-miR-184)		dre-mir-141-1a dre-mir-141-1b dre-mir-184 dre-mir-let7l-a1 dre-mir-let7l-a2		3' CGGGA-AUAGU-CAAGAGGCAGGU 5' dre-mir-184 __ .||.|.|:|||.|||:|||.||:: __ 5' UCCAUCUGUCAUGUUUUCCUUCUG 3' ENSDART00000004890_P E:-18.26 S:99.000000 Loc:1907 Cons: 70.83%(fru)	3' CGGGAAUAGUCAAGAGGCAGGU 5' dre-mir-184 __ .|.|||:||.|||.|.:||||| __ 5' ACACUUGUCUGUU-UAUGUCCA 3' ENSDART00000004890_P E:-20.83 S:93.000000 Loc:2097 Cons: 76.19%(fru)
dre-mir-23-a1	ENSDART00000022513_P	ENSDARG00000020573	SINFRUG00000139154		ENSDARG00000020573 4001 (4001 nt) [ATP DEPENDENT RNA HELICASE; ATP DEPENDENT RNA HELICASE;] [DEAD/DEAH box helicase:DEAD/DEAH box helicase; Helicase, C-terminal:Helicase, C-terminal; DEAD/DEAH box helicase:DEAD/DEAH box helicase; Helicase, C-terminal:Helicase, C-terminal;]	2	37.57	192	SINFRUG00000139154 (fru-miR-23-a1)		dre-mir-124-1c dre-mir-124-1e dre-mir-124-1a dre-mir-124-1d dre-mir-124-1b dre-mir-16-3 fru-mir-200b-2a dre-mir-23-b1 dre-mir-23-a1 dre-mir-23-c1 fru-mir-23-c2 fru-mir-29-12b dre-mir-34 fru-mir-79-1e dre-mir-79 dre-mir-79-1c fru-mir-79-1d dre-mir-79-1b fru-mir-93-1b		3' CCUUUAGGG-ACCGUUACACUA 5' dre-mir-23-a1 __ ..|.||::|..||:|:|||||. __ 5' CUAUAUUUCGGGGUAGUGUGAG 3' ENSDART00000022513_P E:-18.57 S:98.000000 Loc:1369 Cons: 72.73%(fru)	3' CCUUUAGGGACCGU-UACACUA 5' dre-mir-23-a1 __ ||.||..|||||.|.|||||:| __ 5' GGCAA--CCUGGAACAUGUGGU 3' ENSDART00000022513_P E:-19 S:94.000000 Loc:1696 Cons: 70.00%(fru)
dre-mir-23-c1	ENSDART00000022513_P	ENSDARG00000020573	SINFRUG00000139154		ENSDARG00000020573 4001 (4001 nt) [ATP DEPENDENT RNA HELICASE; ATP DEPENDENT RNA HELICASE;] [DEAD/DEAH box helicase:DEAD/DEAH box helicase; Helicase, C-terminal:Helicase, C-terminal; DEAD/DEAH box helicase:DEAD/DEAH box helicase; Helicase, C-terminal:Helicase, C-terminal;]	2	37.57	192	SINFRUG00000139154 (dre-miR-23-c1)		dre-mir-124-1c dre-mir-124-1e dre-mir-124-1a dre-mir-124-1d dre-mir-124-1b dre-mir-16-3 fru-mir-200b-2a dre-mir-23-b1 dre-mir-23-a1 dre-mir-23-c1 fru-mir-23-c2 fru-mir-29-12b dre-mir-34 fru-mir-79-1e dre-mir-79 dre-mir-79-1c fru-mir-79-1d dre-mir-79-1b fru-mir-93-1b		3' CCUUUAGGG-ACCGUUACACUA 5' dre-mir-23-c1 __ ..|.||::|..||:|:|||||. __ 5' CUAUAUUUCGGGGUAGUGUGAG 3' ENSDART00000022513_P E:-18.57 S:98.000000 Loc:1369 Cons: 72.73%(fru)	3' CCUUUAGGGACCGU-UACACUA 5' dre-mir-23-c1 __ ||.||..|||||.|.|||||:| __ 5' GGCAA--CCUGGAACAUGUGGU 3' ENSDART00000022513_P E:-19 S:94.000000 Loc:1696 Cons: 70.00%(fru)
fru-mir-23-c2	ENSDART00000022513_P	ENSDARG00000020573	SINFRUG00000139154		ENSDARG00000020573 4001 (4001 nt) [ATP DEPENDENT RNA HELICASE; ATP DEPENDENT RNA HELICASE;] [DEAD/DEAH box helicase:DEAD/DEAH box helicase; Helicase, C-terminal:Helicase, C-terminal; DEAD/DEAH box helicase:DEAD/DEAH box helicase; Helicase, C-terminal:Helicase, C-terminal;]	2	37.57	192	SINFRUG00000139154 (fru-miR-23-c2)		dre-mir-124-1c dre-mir-124-1e dre-mir-124-1a dre-mir-124-1d dre-mir-124-1b dre-mir-16-3 fru-mir-200b-2a dre-mir-23-b1 dre-mir-23-a1 dre-mir-23-c1 fru-mir-23-c2 fru-mir-29-12b dre-mir-34 fru-mir-79-1e dre-mir-79 dre-mir-79-1c fru-mir-79-1d dre-mir-79-1b fru-mir-93-1b		3' CCUUUAGGG-ACCGUUACACUA 5' fru-mir-23-c2 __ ..|.||::|..||:|:|||||. __ 5' CUAUAUUUCGGGGUAGUGUGAG 3' ENSDART00000022513_P E:-18.57 S:98.000000 Loc:1369 Cons: 72.73%(fru)	3' CCUUUAGGGACCGU-UACACUA 5' fru-mir-23-c2 __ ||.||..|||||.|.|||||:| __ 5' GGCAA--CCUGGAACAUGUGGU 3' ENSDART00000022513_P E:-19 S:94.000000 Loc:1696 Cons: 70.00%(fru)
dre-mir-194	ENSDART00000023431_P	ENSDARG00000018577	SINFRUG00000136882		ENSDARG00000018577 4001 (4001 nt) [TSPEAR PRECURSOR TSP EAR;] []	2	42.24	192	SINFRUG00000136882 (dre-miR-194)		dre-mir-194 fru-mir-194-1a		3' AGGUGUACCUCAACGACAAUGU 5' dre-mir-194 __ |||||..||:|||..||||:|| __ 5' UCCAC--GGGGUU--UGUUGCA 3' ENSDART00000023431_P E:-21.120001 S:96.000000 Loc:731 Cons: 77.78%(fru)	3' AGGUGUACCUCAACGACAAUGU 5' dre-mir-194 __ |||||..||:|||..||||:|| __ 5' UCCAC--GGGGUU--UGUUGCA 3' ENSDART00000023431_P E:-21.120001 S:96.000000 Loc:1301 Cons: 77.78%(fru)
fru-mir-194-1a	ENSDART00000023431_P	ENSDARG00000018577	SINFRUG00000136882		ENSDARG00000018577 4001 (4001 nt) [TSPEAR PRECURSOR TSP EAR;] []	2	42.24	192	SINFRUG00000136882 (fru-miR-194-1a)		dre-mir-194 fru-mir-194-1a		3' AGGUGUACCUCAACGACAAUGU 5' fru-mir-194-1a __ |||||..||:|||..||||:|| __ 5' UCCAC--GGGGUU--UGUUGCA 3' ENSDART00000023431_P E:-21.120001 S:96.000000 Loc:731 Cons: 77.78%(fru)	3' AGGUGUACCUCAACGACAAUGU 5' fru-mir-194-1a __ |||||..||:|||..||||:|| __ 5' UCCAC--GGGGUU--UGUUGCA 3' ENSDART00000023431_P E:-21.120001 S:96.000000 Loc:1301 Cons: 77.78%(fru)
dre-mir-16-2	ENSDART00000026140_P	ENSDARG00000012102	SINFRUG00000146513		ENSDARG00000012102 4001 (4001 nt) [PHD FINGER 14;] []	2	35.9	192	SINFRUG00000146513 (fru-miR-16-2)		dre-mir-16-2		3' GUGGUUAU-AAAUGCACGACGAU 5' dre-mir-16-2 __ .||.:|.:.|..|:|||:||||: __ 5' AACAGAGGCUACAUGUGUUGCUG 3' ENSDART00000026140_P E:-17.950001 S:96.000000 Loc:1130 Cons: 73.91%(fru)	3' GUGGUUAU-AAAUGCACGACGAU 5' dre-mir-16-2 __ .||.:|.:.|..|:|||:||||: __ 5' AACAGAGGCUACAUGUGUUGCUG 3' ENSDART00000026140_P E:-17.950001 S:96.000000 Loc:1979 Cons: 73.91%(fru)
dre-mir-101-1a	ENSDART00000021905_P	ENSDARG00000010559	SINFRUG00000136328		ENSDARG00000010559 4001 (4001 nt) [L SERINE DEHYDRATASE EC_4.3.1.17 L SERINE DEAMINASE;] [Pyridoxal-5'-phosphate-dependent enzyme, beta family:Pyridoxal-5'-phosphate-dependent enzyme, beta family;]	2	36.38	192	SINFRUG00000136328 (fru-miR-101-1a)		dre-mir-101-1a		3' GAAGUCA-AUAGUGUCAUGACAU 5' dre-mir-101-1a __ |.|||||.|:|..||||.||||| __ 5' CAUCAGUCUGUACCAGU-CUGUA 3' ENSDART00000021905_P E:-18.190001 S:96.000000 Loc:1704 Cons: 77.27%(fru)	3' GAAGUCA-AUAGUGUCAUGACAU 5' dre-mir-101-1a __ |.|||||.|:|..||||.||||| __ 5' CAUCAGUCUGUACCAGU-CUGUA 3' ENSDART00000021905_P E:-18.190001 S:96.000000 Loc:2123 Cons: 77.27%(fru)
dre-mir-21-1b	ENSDART00000005159_P	ENSDARG00000010441	SINFRUG00000150041		ENSDARG00000010441 4001 (4001 nt) [39S RIBOSOMAL L45 MITOCHONDRIAL PRECURSOR L45MT MRP L45;] []	2	39.97	191	SINFRUG00000150041 (fru-miR-21-1b)		dre-mir-138-2 dre-mir-21-1b fru-mir-21-1c dre-mir-21-1a		3' GGUUGUGGUCAGACUAUUCGAU 5' dre-mir-21-1b __ .|||.|.||||.|||||:.||: __ 5' ACAAAAGCAGUGUGAUAGACUG 3' ENSDART00000005159_P E:-19.370001 S:100.000000 Loc:2751 Cons: 72.73%(fru)	3' GGU-UGUGGUCAGACUAUUCGAU 5' dre-mir-21-1b __ .||.|||||||.|||||.:|:.: __ 5' ACACACACCAG-CUGAUUGGUGG 3' ENSDART00000005159_P E:-20.6 S:91.000000 Loc:2089 Cons: 72.73%(fru)
fru-mir-21-1c	ENSDART00000005159_P	ENSDARG00000010441	SINFRUG00000150041		ENSDARG00000010441 4001 (4001 nt) [39S RIBOSOMAL L45 MITOCHONDRIAL PRECURSOR L45MT MRP L45;] []	2	39.97	191	SINFRUG00000150041 (fru-miR-21-1c)		dre-mir-138-2 dre-mir-21-1b fru-mir-21-1c dre-mir-21-1a		3' GGUUGUGGUCAGACUAUUCGAU 5' fru-mir-21-1c __ .|||.|.||||.|||||:.||: __ 5' ACAAAAGCAGUGUGAUAGACUG 3' ENSDART00000005159_P E:-19.370001 S:100.000000 Loc:2751 Cons: 72.73%(fru)	3' GGU-UGUGGUCAGACUAUUCGAU 5' fru-mir-21-1c __ .||.|||||||.|||||.:|:.: __ 5' ACACACACCAG-CUGAUUGGUGG 3' ENSDART00000005159_P E:-20.6 S:91.000000 Loc:2089 Cons: 72.73%(fru)
dre-mir-21-1a	ENSDART00000005159_P	ENSDARG00000010441	SINFRUG00000150041		ENSDARG00000010441 4001 (4001 nt) [39S RIBOSOMAL L45 MITOCHONDRIAL PRECURSOR L45MT MRP L45;] []	2	39.97	191	SINFRUG00000150041 (fru-miR-21-1a)		dre-mir-138-2 dre-mir-21-1b fru-mir-21-1c dre-mir-21-1a		3' GGUUGUGGUCAGACUAUUCGAU 5' dre-mir-21-1a __ .|||.|.||||.|||||:.||: __ 5' ACAAAAGCAGUGUGAUAGACUG 3' ENSDART00000005159_P E:-19.370001 S:100.000000 Loc:2751 Cons: 72.73%(fru)	3' GGU-UGUGGUCAGACUAUUCGAU 5' dre-mir-21-1a __ .||.|||||||.|||||.:|:.: __ 5' ACACACACCAG-CUGAUUGGUGG 3' ENSDART00000005159_P E:-20.6 S:91.000000 Loc:2089 Cons: 72.73%(fru)
dre-mir-138-1	ENSDART00000002912_P	ENSDARG00000004255	SINFRUG00000154155		ENSDARG00000004255 4001 (4001 nt) [PEROXISOME PROLIFERATOR ACTIVATED RECEPTOR PPAR;] [Peroxisome proliferator-activated receptor:Peroxisome proliferator-activated receptor; Steroid hormone receptor:Steroid hormone receptor; Ligand-binding domain of nuclear hormone receptor:Ligand-binding domain of nuclear hormone receptor; Zn-finger, C4-type steroid receptor:Zn-finger, C4-type steroid receptor;]	2	36.95	191	SINFRUG00000154155 (fru-miR-138-1)		dre-mir-138-1 dre-mir-138-2 fru-mir-304		3' CGGACUAAGUGUUGUGGUCGA 5' dre-mir-138-1 __ |::||..|:::|||.|||||| __ 5' GUUUG--UUGUAAC-CCAGCU 3' ENSDART00000002912_P E:-17.57 S:96.000000 Loc:1262 Cons: 77.78%(fru)	3' CGGACUAAGUGUUGUGGUCGA 5' dre-mir-138-1 __ |::|.:.||::|||.|||||| __ 5' GUUUUG-UCGUAAC-CCAGCU 3' ENSDART00000002912_P E:-19.379999 S:95.000000 Loc:465 Cons: 73.68%(fru)
dre-mir-172	ENSDART00000016412_P	ENSDARG00000019895	SINFRUG00000154075		ENSDARG00000019895 4001 (4001 nt) [UNKNOWN;] [Protein kinase:Protein kinase;]	2	39.58	191	SINFRUG00000154075 (dre-miR-172)		dre-mir-139 dre-mir-172 dre-mir-34		3' UUGUUGGUCGAUUCUGUGACGGU 5' dre-mir-172 __ ||.|||:|||..||..|:||||| __ 5' AAAAACUAGCGUAG--AUUGCCA 3' ENSDART00000016412_P E:-19.790001 S:97.000000 Loc:2170 Cons: 71.43%(fru)	3' UUGUUGGUCGAUUCUGUGACGGU 5' dre-mir-172 __ :|.|||:|||..||..|:||||| __ 5' GAAAACUAGCGUAG--AUUGCCA 3' ENSDART00000016412_P E:-19.790001 S:94.000000 Loc:1413 Cons: 76.19%(fru)
dre-mir-31	ENSDART00000009405_P	ENSDARG00000018156	SINFRUG00000152870		ENSDARG00000018156 4001 (4001 nt) [RECEPTOR PRECURSOR EC_2.7.1.37;] [Protein kinase:Protein kinase; TGF-beta receptor/activin receptor, type I/II:TGF-beta receptor/activin receptor, type I/II;]	2	36.36	191	SINFRUG00000152870 (dre-miR-31)		dre-mir-130-2a dre-mir-31		3' GUCGAUACGGUUGUAGAACGGU 5' dre-mir-31 __ ::|:|.|.|||||||.|||:|| __ 5' UGGUU-U-CCAACAU-UUGUCA 3' ENSDART00000009405_P E:-17.98 S:98.000000 Loc:2052 Cons: 73.68%(fru)	3' GUCGAUACGGUUGUAGAACGGU 5' dre-mir-31 __ |||:|.|.|||||||.|||.|: __ 5' CAGUU-UUCCAACAU-UUGACG 3' ENSDART00000009405_P E:-18.379999 S:93.000000 Loc:1000 Cons: 75.00%(fru)
fru-mir-152-1b	ENSDART00000012455_P	ENSDARG00000009980	SINFRUG00000123947		ENSDARG00000009980 4001 (4001 nt) [UNKEMPT; UNKEMPT;] []	2	36.48	190	SINFRUG00000123947 (fru-miR-152-1b)		dre-mir-106-a1 dre-mir-122a dre-mir-148-1b dre-mir-148-1a fru-mir-152-1b dre-mir-152 fru-mir-152-1a dre-mir-17-1d dre-mir-17-1b dre-mir-17-1a dre-mir-18-2b dre-mir-18-2 dre-mir-20-2b dre-mir-20-2a dre-mir-22-1 fru-mir-22-1a fru-mir-93-2b		3' GUUUC-AAGACAUUACGUGACU 5' fru-mir-152-1b __ ::|||.||:|||.:||:||||. __ 5' UGAAGCUUUUGU-GUGUACUGU 3' ENSDART00000012455_P E:-18.719999 S:95.000000 Loc:530 Cons: 95.24%(fru)	3' GUUUCAAGACAUUACGUGACU 5' fru-mir-152-1b __ ::.||..:||||:|||.|||. __ 5' UGUAGAAUUGUAGUGCUCUGU 3' ENSDART00000012455_P E:-17.76 S:95.000000 Loc:1288 Cons: 71.43%(fru)
fru-mir-106-b2	ENSDART00000026503_P	ENSDARG00000009736	SINFRUG00000136422		ENSDARG00000009736 4001 (4001 nt) [TRANSCRIPTIONAL REPRESSOR YY1 YIN AND YANG 1 YY 1 DELTA TRANSCRIPTION FACTOR NF E1; TRANSCRIPTIONAL REPRESSOR YY1 YIN AND YANG 1 YY 1 DELTA TRANSCRIPTION FACTOR NF E1; TRANSCRIPTIONAL REPRESSOR YY1 YIN AND YANG 1 YY 1 DELTA TRANSCRIPTION FACTOR NF E1;] [Zn-finger, C2H2 type:Zn-finger, C2H2 type; Zn-finger, C2H2 type:Zn-finger, C2H2 type; Zn-finger, C2H2 type:Zn-…	2	42.62	190	SINFRUG00000136422 (fru-miR-106-b2)		dre-mir-106-a1 fru-mir-106-b2 dre-mir-106-c1 dre-mir-17-1b dre-mir-17-1d fru-mir-17-1e dre-mir-17-1c dre-mir-17-1a fru-mir-18-1b fru-mir-18-1a dre-mir-18-2b dre-mir-18-2 dre-mir-18-1 dre-mir-19-1d dre-mir-19-1b dre-mir-20-1b dre-mir-20-1 dre-mir-27-1a fru-mir-93-2b dre-mir-93		3' AUGGACGUGACAUUCGUGAAAU 5' fru-mir-106-b2 __ |||||||||....|||||||.: __ 5' UACCUGCAC----AGCACUUCG 3' ENSDART00000026503_P E:-22.549999 S:97.000000 Loc:1185 Cons: 88.89%(fru)	3' AUGGACGUGACAUUCGUGAAAU 5' fru-mir-106-b2 __ |||||||:...|.|||||||.| __ 5' UACCUGCG---U-AGCACUUAA 3' ENSDART00000026503_P E:-20.07 S:93.000000 Loc:1377 Cons: 77.78%(fru)
dre-mir-184	ENSDART00000011560_P	ENSDARG00000013525	SINFRUG00000135423		ENSDARG00000013525 4001 (4001 nt) [ANTIGEN;] [CD9/CD37/CD63 antigen:CD9/CD37/CD63 antigen;]	2	46.23	189	SINFRUG00000135423 (dre-miR-184)		dre-mir-184		3' CGGGAAUAGUCAAGAGGCAGGU 5' dre-mir-184 __ |:||.|:||||.||.|:||||| __ 5' GUCC-UGUCAGCUC-CUGUCCA 3' ENSDART00000011560_P E:-27.459999 S:98.000000 Loc:2566 Cons: 80.00%(fru)	3' CGGGAAUAGUCAAGAGGCAGGU 5' dre-mir-184 __ |:|||.|..||||.|||.|||| __ 5' GUCCUCA-AAGUU-UCCCUCCA 3' ENSDART00000011560_P E:-18.77 S:91.000000 Loc:2283 Cons: 70.00%(fru)
dre-mir-138-1	ENSDART00000026836_P	ENSDARG00000018821	SINFRUG00000155541		ENSDARG00000018821 4001 (4001 nt) [AMBIGUOUS; AMBIGUOUS;] [Proline-rich extensin:Proline-rich extensin; SH2 motif:SH2 motif;]	2	36.52	188	SINFRUG00000155540 (fru-miR-138-1)		dre-mir-138-1 dre-mir-138-2		3' CGGACUAAGUGUUGUGGUCGA 5' dre-mir-138-1 __ |||.|:|.|||.|::||||:. __ 5' GCCCGGUGCACCAUGCCAGUG 3' ENSDART00000026836_P E:-17.58 S:97.000000 Loc:1315 Cons: 71.43%(fru)	3' CGGACUAAGUGUUGUGGUCGA 5' dre-mir-138-1 __ .||.||..|||.|||||||.. __ 5' ACCAGA--CACCACACCAGAC 3' ENSDART00000026836_P E:-18.940001 S:91.000000 Loc:1187 Cons: 84.21%(fru)
dre-mir-31	ENSDART00000011937_P	ENSDARG00000002592	SINFRUG00000128625		ENSDARG00000002592 4001 (4001 nt) [AMBIGUOUS;] [WWE domain:WWE domain;]	2	39.88	188	SINFRUG00000128625 (dre-miR-31)		dre-mir-106-b1 dre-mir-20-1b dre-mir-20-1 dre-mir-31		3' GUCGAUACGGUUGUAGAACGGU 5' dre-mir-31 __ |||||.||||.|.:|:||||:. __ 5' CAGCUCUGCCCA-GUUUUGCUU 3' ENSDART00000011937_P E:-21.34 S:95.000000 Loc:362 Cons: 76.19%(fru)	3' GUCGAUACGGUUGU-AGAACGGU 5' dre-mir-31 __ |||||.||.|.|||.|:||||:. __ 5' CAGCUCUG-C-ACAGUUUUGCUU 3' ENSDART00000011937_P E:-18.540001 S:93.000000 Loc:1175 Cons: 80.95%(fru)
dre-mir-204	ENSDART00000013688_P	ENSDARG00000018884	SINFRUG00000126446		ENSDARG00000018884 2900 (2900 nt) [ARGININE N METHYLTRANSFERASE EC_2.1.1.-;] []	2	42.84	188	SINFRUG00000126446 (dre-miR-204)		dre-mir-152 dre-mir-204 fru-mir-204-1b		3' GUCCGUAUCCUACUGUUUCCCUU 5' dre-mir-204 __ .||||..|||.|||.||:|||.| __ 5' AAGGC--AGG-UGAAAAGGGGCA 3' ENSDART00000013688_P E:-21.42 S:94.000000 Loc:1923 Cons: 70.00%(fru)	3' GUCCGUAUCCUACUGUUUCCCUU 5' dre-mir-204 __ .||||..|||.|||.||:|||.| __ 5' AAGGC--AGG-UGAAAAGGGGCA 3' ENSDART00000013688_P E:-21.42 S:94.000000 Loc:2575 Cons: 70.00%(fru)
fru-mir-204-1b	ENSDART00000013688_P	ENSDARG00000018884	SINFRUG00000126446		ENSDARG00000018884 2900 (2900 nt) [ARGININE N METHYLTRANSFERASE EC_2.1.1.-;] []	2	42.84	188	SINFRUG00000126446 (fru-miR-204-1b)		dre-mir-152 dre-mir-204 fru-mir-204-1b		3' GUCCGUAUCCUACUGUUUCCCUU 5' fru-mir-204-1b __ .||||..|||.|||.||:|||.| __ 5' AAGGC--AGG-UGAAAAGGGGCA 3' ENSDART00000013688_P E:-21.42 S:94.000000 Loc:1923 Cons: 70.00%(fru)	3' GUCCGUAUCCUACUGUUUCCCUU 5' fru-mir-204-1b __ .||||..|||.|||.||:|||.| __ 5' AAGGC--AGG-UGAAAAGGGGCA 3' ENSDART00000013688_P E:-21.42 S:94.000000 Loc:2575 Cons: 70.00%(fru)
dre-mir-205	ENSDART00000011166_P	ENSDARG00000017785	SINFRUG00000131084		ENSDARG00000017785 4001 (4001 nt) [AMBIGUOUS;] [SH3 domain:SH3 domain;]	2	45.78	188	SINFRUG00000131084 (dre-miR-205)		dre-mir-205 fru-mir-205-1a		3' GUCUGAGGCCACCUUACUUCCU 5' dre-mir-205 __ |.||:.:|.|.||.|||:|||: __ 5' CUGAUCUCUG-GGUAUGGAGGG 3' ENSDART00000011166_P E:-22.889999 S:94.000000 Loc:604 Cons: 76.19%(fru)	3' GUCUGAGGCCACCUUACUUCCU 5' dre-mir-205 __ |.||:.:|.|.||.|||:|||: __ 5' CUGAUCUCUG-GGUAUGGAGGG 3' ENSDART00000011166_P E:-22.889999 S:94.000000 Loc:781 Cons: 76.19%(fru)
fru-mir-205-1a	ENSDART00000011166_P	ENSDARG00000017785	SINFRUG00000131084		ENSDARG00000017785 4001 (4001 nt) [AMBIGUOUS;] [SH3 domain:SH3 domain;]	2	45.78	188	SINFRUG00000131084 (fru-miR-205-1a)		dre-mir-205 fru-mir-205-1a		3' GUCUGAGGCCACCUUACUUCCU 5' fru-mir-205-1a __ |.||:.:|.|.||.|||:|||: __ 5' CUGAUCUCUG-GGUAUGGAGGG 3' ENSDART00000011166_P E:-22.889999 S:94.000000 Loc:604 Cons: 76.19%(fru)	3' GUCUGAGGCCACCUUACUUCCU 5' fru-mir-205-1a __ |.||:.:|.|.||.|||:|||: __ 5' CUGAUCUCUG-GGUAUGGAGGG 3' ENSDART00000011166_P E:-22.889999 S:94.000000 Loc:781 Cons: 76.19%(fru)
dre-mir-93	ENSDART00000008197_P	ENSDARG00000004926	SINFRUG00000149411		ENSDARG00000004926 4001 (4001 nt) [HISTONE RNA HAIRPIN BINDING HISTONE STEM LOOP BINDING; HISTONE RNA HAIRPIN BINDING HISTONE STEM LOOP BINDING;] []	2	51.58	188	SINFRUG00000149411 (dre-miR-93)		fru-mir-132a fru-mir-132b dre-mir-132 dre-mir-93		3' GAUGGACGUGUU-UGUCGUGAAA 5' dre-mir-93 __ :||||||||||:.|||.||||.. __ 5' UUACCUGCACAGCACA-CACUAG 3' ENSDART00000008197_P E:-25.790001 S:94.000000 Loc:1827 Cons: 81.82%(fru)	3' GAUGGACGUGUU-UGUCGUGAAA 5' dre-mir-93 __ :||||||||||:.|||.||||.. __ 5' UUACCUGCACAGCACA-CACUAG 3' ENSDART00000008197_P E:-25.790001 S:94.000000 Loc:2065 Cons: 81.82%(fru)
dre-mir-130-1b	ENSDART00000005914_P	ENSDARG00000012155	SINFRUG00000141212		ENSDARG00000012155 4001 (4001 nt) [ARM REPEAT STRUCTURE CONTAINING; ARM REPEAT STRUCTURE CONTAINING;] []	2	34.39	188	SINFRUG00000141212 (dre-miR-130-1b)		dre-mir-130-1b		3' UACGGGAAAAUUGUAACGUGAC 5' dre-mir-130-1b __ .|||.|||||....|||||||| __ 5' UUGCACUUUU----UUGCACUG 3' ENSDART00000005914_P E:-17.27 S:97.000000 Loc:1779 Cons: 72.22%(fru)	3' UACGGGAAAAUUGUAACGUGAC 5' dre-mir-130-1b __ |||.|:.|||..||||||.||| __ 5' AUGGCUGUUU-UCAUUGC-CUG 3' ENSDART00000005914_P E:-17.120001 S:91.000000 Loc:1469 Cons: 80.00%(fru)
dre-mir-98-3b	ENSDART00000021558_P	ENSDARG00000013492	SINFRUG00000155565		ENSDARG00000013492 4001 (4001 nt) [ZINC FINGER 297B;] [Zn-finger, C2H2 type:Zn-finger, C2H2 type; BTB/POZ domain:BTB/POZ domain;]	2	35.99	188	SINFRUG00000155565 (fru-miR-98-3b)		dre-mir-138-2 fru-mir-93-1a dre-mir-98-3b dre-mir-98-3a		3' UUGGUGUGUUG-GAUGAUGGAGU 5' dre-mir-98-3b __ .::||:|:.||.||.:|||||.| __ 5' UGUCAUAUCACGCUUUUACCUGA 3' ENSDART00000021558_P E:-17.15 S:94.000000 Loc:608 Cons: 73.91%(fru)	3' UUGGUGUGUUGGAUGAUGGAGU 5' dre-mir-98-3b __ .||||.|.::|:|:.|||:||| __ 5' UACCA-A-GGCUUGAUACUUCA 3' ENSDART00000021558_P E:-18.84 S:94.000000 Loc:921 Cons: 75.00%(fru)
dre-mir-98-3a	ENSDART00000021558_P	ENSDARG00000013492	SINFRUG00000155565		ENSDARG00000013492 4001 (4001 nt) [ZINC FINGER 297B;] [Zn-finger, C2H2 type:Zn-finger, C2H2 type; BTB/POZ domain:BTB/POZ domain;]	2	35.99	188	SINFRUG00000155565 (fru-miR-98-3a)		dre-mir-138-2 fru-mir-93-1a dre-mir-98-3b dre-mir-98-3a		3' UUGGUGUGUUG-GAUGAUGGAGU 5' dre-mir-98-3a __ .::||:|:.||.||.:|||||.| __ 5' UGUCAUAUCACGCUUUUACCUGA 3' ENSDART00000021558_P E:-17.15 S:94.000000 Loc:608 Cons: 73.91%(fru)	3' UUGGUGUGUUGGAUGAUGGAGU 5' dre-mir-98-3a __ .||||.|.::|:|:.|||:||| __ 5' UACCA-A-GGCUUGAUACUUCA 3' ENSDART00000021558_P E:-18.84 S:94.000000 Loc:921 Cons: 75.00%(fru)
dre-mir-16-3	ENSDART00000003278_P	ENSDARG00000003054	SINFRUG00000127798		ENSDARG00000003054 4001 (4001 nt) [K RECEPTOR NEUROKININ RECEPTOR NK RECEPTOR NK;] [Rhodopsin-like GPCR superfamily:Rhodopsin-like GPCR superfamily; Neurokinin receptor:Neurokinin receptor; Neurokinin NK3 receptor:Neurokinin NK3 receptor; Neuropeptide Y receptor:Neuropeptide Y receptor;]	2	36.58	186	SINFRUG00000139426 (dre-miR-16-3)		fru-mir-132b dre-mir-132 fru-mir-132a dre-mir-16-3 dre-mir-34-2b dre-mir-34-3a		3' GAGGUUAUAAAUGUACGACGAU 5' dre-mir-16-3 __ .|||||.|...||||||.|||| __ 5' GUCCAA-A--GACAUGC-GCUA 3' ENSDART00000003278_P E:-18.83 S:93.000000 Loc:987 Cons: 72.22%(fru)	3' GAGGUUAUAAAUGUACGACGAU 5' dre-mir-16-3 __ .|||||.|...||||||.|||| __ 5' GUCCAA-A--CACAUGC-GCUA 3' ENSDART00000003278_P E:-17.75 S:93.000000 Loc:1895 Cons: 72.22%(fru)
dre-mir-205	ENSDART00000021577	ENSDARG00000021378	SINFRUG00000139051		ENSDARG00000021378 418 (418 nt) [AMBIGUOUS; AMBIGUOUS; AMBIGUOUS;] [Proline-rich extensin:Proline-rich extensin; Zn-finger-like, PHD finger:Zn-finger-like, PHD finger; Proline-rich extensin:Proline-rich extensin; Zn-finger-like, PHD finger:Zn-finger-like, PHD finger; Zn-finger-like, PHD finger:Zn-finger-like, PHD finger;]	2	44.86	186	SINFRUG00000139051 (dre-miR-205)		dre-mir-205 fru-mir-205-1a		3' GUCUGAGGCCACCUUACUUCCU 5' dre-mir-205 __ |||.||||.|.||:|||:||.. __ 5' CAG-CUCC-G-GGGAUGGAGAC 3' ENSDART00000021577 E:-25.450001 S:94.000000 Loc:183 Cons: 78.95%(fru)	3' GUCUGAGGCCACCUUACUUCCU 5' dre-mir-205 __ ||||:||:....|||.|||||| __ 5' CAGAUUCU----GAA-GAAGGA 3' ENSDART00000021577 E:-19.41 S:92.000000 Loc:349 Cons: 88.24%(fru)
fru-mir-205-1a	ENSDART00000021577	ENSDARG00000021378	SINFRUG00000139051		ENSDARG00000021378 418 (418 nt) [AMBIGUOUS; AMBIGUOUS; AMBIGUOUS;] [Proline-rich extensin:Proline-rich extensin; Zn-finger-like, PHD finger:Zn-finger-like, PHD finger; Proline-rich extensin:Proline-rich extensin; Zn-finger-like, PHD finger:Zn-finger-like, PHD finger; Zn-finger-like, PHD finger:Zn-finger-like, PHD finger;]	2	44.86	186	SINFRUG00000139051 (fru-miR-205-1a)		dre-mir-205 fru-mir-205-1a		3' GUCUGAGGCCACCUUACUUCCU 5' fru-mir-205-1a __ |||.||||.|.||:|||:||.. __ 5' CAG-CUCC-G-GGGAUGGAGAC 3' ENSDART00000021577 E:-25.450001 S:94.000000 Loc:183 Cons: 78.95%(fru)	3' GUCUGAGGCCACCUUACUUCCU 5' fru-mir-205-1a __ ||||:||:....|||.|||||| __ 5' CAGAUUCU----GAA-GAAGGA 3' ENSDART00000021577 E:-19.41 S:92.000000 Loc:349 Cons: 88.24%(fru)
dre-mir-24-1	ENSDART00000015634_P	ENSDARG00000007722	SINFRUG00000153875		ENSDARG00000007722 4001 (4001 nt) [AMBIGUOUS;] [NUDIX hydrolase:NUDIX hydrolase;]	2	39.23	186	SINFRUG00000153875 (fru-miR-24-1)		fru-mir-205-1a dre-mir-205 dre-mir-24-1 fru-mir-24-3		3' GACAAGGACGACUUGACUCGGU 5' dre-mir-24-1 __ :|.||:|||.||:::.|||||. __ 5' UUAUUUCUG-UGGGUGGAGCCU 3' ENSDART00000015634_P E:-19.950001 S:94.000000 Loc:2407 Cons: 71.43%(fru)	3' GACAAGGACGACUUGACUCGGU 5' dre-mir-24-1 __ .|.||:|||.||:::.|||||. __ 5' AUUUUUCUG-UGGGUGGAGCCU 3' ENSDART00000015634_P E:-19.280001 S:92.000000 Loc:1343 Cons: 71.43%(fru)
dre-mir-9c	ENSDART00000013811	ENSDARG00000005335	SINFRUG00000129113		ENSDARG00000005335 447 (447 nt) [ORGANIC TRANSPORTER SOLUTE CARRIER FAMILY 22 MEMBER; ORGANIC TRANSPORTER SOLUTE CARRIER FAMILY 22 MEMBER; ORGANIC TRANSPORTER SOLUTE CARRIER FAMILY 22 MEMBER; ORGANIC TRANSPORTER SOLUTE CARRIER FAMILY 22 MEMBER; ORGANIC TRANSPORTER SOLUTE CARRIER FAMILY 22 MEMBER;] [General substrate transporter:General substrate transporter; General substrate transporter:General …	2	41.1	186	SINFRUG00000129113 (fru-miR-9c)		dre-mir-9c dre-mir-9f dre-mir-9a fru-mir-9g dre-mir-9d dre-mir-9b dre-mir-9e		3' AGUAUGUCGAUCUAUUGGUUUCU 5' dre-mir-9c __ ||||||.|||.|||..|||:||: __ 5' UCAUACUGCU-GAU-CCCAGAGG 3' ENSDART00000013811 E:-22.57 S:95.000000 Loc:109 Cons: 80.95%(fru)	3' AGUAUGUCGAUCUAUUGGUUUCU 5' dre-mir-9c __ ..||.|||||...|.||||:||| __ 5' GGAU-CAGCU---UUACCAGAGA 3' ENSDART00000013811 E:-18.530001 S:91.000000 Loc:401 Cons: 84.21%(fru)
dre-mir-9f	ENSDART00000013811	ENSDARG00000005335	SINFRUG00000129113		ENSDARG00000005335 447 (447 nt) [ORGANIC TRANSPORTER SOLUTE CARRIER FAMILY 22 MEMBER; ORGANIC TRANSPORTER SOLUTE CARRIER FAMILY 22 MEMBER; ORGANIC TRANSPORTER SOLUTE CARRIER FAMILY 22 MEMBER; ORGANIC TRANSPORTER SOLUTE CARRIER FAMILY 22 MEMBER; ORGANIC TRANSPORTER SOLUTE CARRIER FAMILY 22 MEMBER;] [General substrate transporter:General substrate transporter; General substrate transporter:General …	2	41.1	186	SINFRUG00000129113 (fru-miR-9f)		dre-mir-9c dre-mir-9f dre-mir-9a fru-mir-9g dre-mir-9d dre-mir-9b dre-mir-9e		3' AGUAUGUCGAUCUAUUGGUUUCU 5' dre-mir-9f __ ||||||.|||.|||..|||:||: __ 5' UCAUACUGCU-GAU-CCCAGAGG 3' ENSDART00000013811 E:-22.57 S:95.000000 Loc:109 Cons: 80.95%(fru)	3' AGUAUGUCGAUCUAUUGGUUUCU 5' dre-mir-9f __ ..||.|||||...|.||||:||| __ 5' GGAU-CAGCU---UUACCAGAGA 3' ENSDART00000013811 E:-18.530001 S:91.000000 Loc:401 Cons: 84.21%(fru)
dre-mir-9a	ENSDART00000013811	ENSDARG00000005335	SINFRUG00000129113		ENSDARG00000005335 447 (447 nt) [ORGANIC TRANSPORTER SOLUTE CARRIER FAMILY 22 MEMBER; ORGANIC TRANSPORTER SOLUTE CARRIER FAMILY 22 MEMBER; ORGANIC TRANSPORTER SOLUTE CARRIER FAMILY 22 MEMBER; ORGANIC TRANSPORTER SOLUTE CARRIER FAMILY 22 MEMBER; ORGANIC TRANSPORTER SOLUTE CARRIER FAMILY 22 MEMBER;] [General substrate transporter:General substrate transporter; General substrate transporter:General …	2	41.1	186	SINFRUG00000129113 (fru-miR-9a)		dre-mir-9c dre-mir-9f dre-mir-9a fru-mir-9g dre-mir-9d dre-mir-9b dre-mir-9e		3' AGUAUGUCGAUCUAUUGGUUUCU 5' dre-mir-9a __ ||||||.|||.|||..|||:||: __ 5' UCAUACUGCU-GAU-CCCAGAGG 3' ENSDART00000013811 E:-22.57 S:95.000000 Loc:109 Cons: 80.95%(fru)	3' AGUAUGUCGAUCUAUUGGUUUCU 5' dre-mir-9a __ ..||.|||||...|.||||:||| __ 5' GGAU-CAGCU---UUACCAGAGA 3' ENSDART00000013811 E:-18.530001 S:91.000000 Loc:401 Cons: 84.21%(fru)
fru-mir-9g	ENSDART00000013811	ENSDARG00000005335	SINFRUG00000129113		ENSDARG00000005335 447 (447 nt) [ORGANIC TRANSPORTER SOLUTE CARRIER FAMILY 22 MEMBER; ORGANIC TRANSPORTER SOLUTE CARRIER FAMILY 22 MEMBER; ORGANIC TRANSPORTER SOLUTE CARRIER FAMILY 22 MEMBER; ORGANIC TRANSPORTER SOLUTE CARRIER FAMILY 22 MEMBER; ORGANIC TRANSPORTER SOLUTE CARRIER FAMILY 22 MEMBER;] [General substrate transporter:General substrate transporter; General substrate transporter:General …	2	41.1	186	SINFRUG00000129113 (fru-miR-9g)		dre-mir-9c dre-mir-9f dre-mir-9a fru-mir-9g dre-mir-9d dre-mir-9b dre-mir-9e		3' AGUAUGUCGAUCUAUUGGUUUCU 5' fru-mir-9g __ ||||||.|||.|||..|||:||: __ 5' UCAUACUGCU-GAU-CCCAGAGG 3' ENSDART00000013811 E:-22.57 S:95.000000 Loc:109 Cons: 80.95%(fru)	3' AGUAUGUCGAUCUAUUGGUUUCU 5' fru-mir-9g __ ..||.|||||...|.||||:||| __ 5' GGAU-CAGCU---UUACCAGAGA 3' ENSDART00000013811 E:-18.530001 S:91.000000 Loc:401 Cons: 84.21%(fru)
dre-mir-9d	ENSDART00000013811	ENSDARG00000005335	SINFRUG00000129113		ENSDARG00000005335 447 (447 nt) [ORGANIC TRANSPORTER SOLUTE CARRIER FAMILY 22 MEMBER; ORGANIC TRANSPORTER SOLUTE CARRIER FAMILY 22 MEMBER; ORGANIC TRANSPORTER SOLUTE CARRIER FAMILY 22 MEMBER; ORGANIC TRANSPORTER SOLUTE CARRIER FAMILY 22 MEMBER; ORGANIC TRANSPORTER SOLUTE CARRIER FAMILY 22 MEMBER;] [General substrate transporter:General substrate transporter; General substrate transporter:General …	2	41.1	186	SINFRUG00000129113 (fru-miR-9d)		dre-mir-9c dre-mir-9f dre-mir-9a fru-mir-9g dre-mir-9d dre-mir-9b dre-mir-9e		3' AGUAUGUCGAUCUAUUGGUUUCU 5' dre-mir-9d __ ||||||.|||.|||..|||:||: __ 5' UCAUACUGCU-GAU-CCCAGAGG 3' ENSDART00000013811 E:-22.57 S:95.000000 Loc:109 Cons: 80.95%(fru)	3' AGUAUGUCGAUCUAUUGGUUUCU 5' dre-mir-9d __ ..||.|||||...|.||||:||| __ 5' GGAU-CAGCU---UUACCAGAGA 3' ENSDART00000013811 E:-18.530001 S:91.000000 Loc:401 Cons: 84.21%(fru)
dre-mir-9b	ENSDART00000013811	ENSDARG00000005335	SINFRUG00000129113		ENSDARG00000005335 447 (447 nt) [ORGANIC TRANSPORTER SOLUTE CARRIER FAMILY 22 MEMBER; ORGANIC TRANSPORTER SOLUTE CARRIER FAMILY 22 MEMBER; ORGANIC TRANSPORTER SOLUTE CARRIER FAMILY 22 MEMBER; ORGANIC TRANSPORTER SOLUTE CARRIER FAMILY 22 MEMBER; ORGANIC TRANSPORTER SOLUTE CARRIER FAMILY 22 MEMBER;] [General substrate transporter:General substrate transporter; General substrate transporter:General …	2	41.1	186	SINFRUG00000129113 (fru-miR-9b)		dre-mir-9c dre-mir-9f dre-mir-9a fru-mir-9g dre-mir-9d dre-mir-9b dre-mir-9e		3' AGUAUGUCGAUCUAUUGGUUUCU 5' dre-mir-9b __ ||||||.|||.|||..|||:||: __ 5' UCAUACUGCU-GAU-CCCAGAGG 3' ENSDART00000013811 E:-22.57 S:95.000000 Loc:109 Cons: 80.95%(fru)	3' AGUAUGUCGAUCUAUUGGUUUCU 5' dre-mir-9b __ ..||.|||||...|.||||:||| __ 5' GGAU-CAGCU---UUACCAGAGA 3' ENSDART00000013811 E:-18.530001 S:91.000000 Loc:401 Cons: 84.21%(fru)
dre-mir-9e	ENSDART00000013811	ENSDARG00000005335	SINFRUG00000129113		ENSDARG00000005335 447 (447 nt) [ORGANIC TRANSPORTER SOLUTE CARRIER FAMILY 22 MEMBER; ORGANIC TRANSPORTER SOLUTE CARRIER FAMILY 22 MEMBER; ORGANIC TRANSPORTER SOLUTE CARRIER FAMILY 22 MEMBER; ORGANIC TRANSPORTER SOLUTE CARRIER FAMILY 22 MEMBER; ORGANIC TRANSPORTER SOLUTE CARRIER FAMILY 22 MEMBER;] [General substrate transporter:General substrate transporter; General substrate transporter:General …	2	41.1	186	SINFRUG00000129113 (fru-miR-9e)		dre-mir-9c dre-mir-9f dre-mir-9a fru-mir-9g dre-mir-9d dre-mir-9b dre-mir-9e		3' AGUAUGUCGAUCUAUUGGUUUCU 5' dre-mir-9e __ ||||||.|||.|||..|||:||: __ 5' UCAUACUGCU-GAU-CCCAGAGG 3' ENSDART00000013811 E:-22.57 S:95.000000 Loc:109 Cons: 80.95%(fru)	3' AGUAUGUCGAUCUAUUGGUUUCU 5' dre-mir-9e __ ..||.|||||...|.||||:||| __ 5' GGAU-CAGCU---UUACCAGAGA 3' ENSDART00000013811 E:-18.530001 S:91.000000 Loc:401 Cons: 84.21%(fru)
dre-mir-17-1a	ENSDART00000022810_P	ENSDARG00000009657	SINFRUG00000154424		ENSDARG00000009657 4001 (4001 nt) [CIRCULATING CATHODIC ANTIGEN CCA; CIRCULATING CATHODIC ANTIGEN CCA;] []	2	38.54	184	SINFRUG00000154424 (fru-miR-17-1a)		dre-mir-106-a1 dre-mir-139 dre-mir-15-1b dre-mir-15-1a dre-mir-17-1c dre-mir-17-1a dre-mir-20-2b dre-mir-20-2a fru-mir-93-2b		3' UGAUGGACGUGACAUUCGUGAAAC 5' dre-mir-17-1a __ .:||||||.||.|.:||.|||||| __ 5' UUUACCUGAACAG-GAG-ACUUUG 3' ENSDART00000022810_P E:-20.23 S:93.000000 Loc:657 Cons: 77.27%(fru)	3' UGA-UGGACGUGACAUUCGUGAAAC 5' dre-mir-17-1a __ :||.|.|.|:||||.:||.|:|||| __ 5' GCUGAACAGUACUGAGAG-AUUUUG 3' ENSDART00000022810_P E:-18.309999 S:91.000000 Loc:1523 Cons: 70.83%(fru)
dre-mir-103-1a	ENSDART00000003066_P	ENSDARG00000009865	SINFRUG00000131072		ENSDARG00000009865 4001 (4001 nt) [CYTOHESIN ARF NUCLEOTIDE BINDING SITE OPENER;] [Pleckstrin-like:Pleckstrin-like; SEC7-like domain:SEC7-like domain;]	2	35.6	182	SINFRUG00000131072 (fru-miR-103-1a)		dre-mir-1-2c dre-mir-1-2b dre-mir-103-1a dre-mir-103-2a dre-mir-107-1b dre-mir-93		3' AGUAUCGGGACAUGU-UACGACGA 5' dre-mir-103-1a __ .:|||||.|....||.||||||:| __ 5' CUAUAGCGC----CAUAUGCUGUU 3' ENSDART00000003066_P E:-17.799999 S:91.000000 Loc:1064 Cons: 75.00%(fru)	3' AGUAUCGGGACAUGU-UACGACGA 5' dre-mir-103-1a __ .:|||||.|....||.||||||:| __ 5' CUAUAGCGC----CAUAUGCUGUU 3' ENSDART00000003066_P E:-17.799999 S:91.000000 Loc:1094 Cons: 75.00%(fru)
dre-mir-103-2a	ENSDART00000003066_P	ENSDARG00000009865	SINFRUG00000131072		ENSDARG00000009865 4001 (4001 nt) [CYTOHESIN ARF NUCLEOTIDE BINDING SITE OPENER;] [Pleckstrin-like:Pleckstrin-like; SEC7-like domain:SEC7-like domain;]	2	35.6	182	SINFRUG00000131072 (fru-miR-103-2a)		dre-mir-1-2c dre-mir-1-2b dre-mir-103-1a dre-mir-103-2a dre-mir-107-1b dre-mir-93		3' AGUAUCGGGACAUGU-UACGACGA 5' dre-mir-103-2a __ .:|||||.|....||.||||||:| __ 5' CUAUAGCGC----CAUAUGCUGUU 3' ENSDART00000003066_P E:-17.799999 S:91.000000 Loc:1064 Cons: 75.00%(fru)	3' AGUAUCGGGACAUGU-UACGACGA 5' dre-mir-103-2a __ .:|||||.|....||.||||||:| __ 5' CUAUAGCGC----CAUAUGCUGUU 3' ENSDART00000003066_P E:-17.799999 S:91.000000 Loc:1094 Cons: 75.00%(fru)
dre-mir-107-1b	ENSDART00000003066_P	ENSDARG00000009865	SINFRUG00000131072		ENSDARG00000009865 4001 (4001 nt) [CYTOHESIN ARF NUCLEOTIDE BINDING SITE OPENER;] [Pleckstrin-like:Pleckstrin-like; SEC7-like domain:SEC7-like domain;]	2	35.6	182	SINFRUG00000131072 (fru-miR-107-1b)		dre-mir-1-2c dre-mir-1-2b dre-mir-103-1a dre-mir-103-2a dre-mir-107-1b dre-mir-93		3' AGUAUCGGGACAUGU-UACGACGA 5' dre-mir-107-1b __ .:|||||.|....||.||||||:| __ 5' CUAUAGCGC----CAUAUGCUGUU 3' ENSDART00000003066_P E:-17.799999 S:91.000000 Loc:1064 Cons: 75.00%(fru)	3' AGUAUCGGGACAUGU-UACGACGA 5' dre-mir-107-1b __ .:|||||.|....||.||||||:| __ 5' CUAUAGCGC----CAUAUGCUGUU 3' ENSDART00000003066_P E:-17.799999 S:91.000000 Loc:1094 Cons: 75.00%(fru)
dre-mir-129-1	ENSDART00000015822_P	ENSDARG00000007606	SINFRUG00000126561		ENSDARG00000007606 4001 (4001 nt) [VITELLINE MEMBRANE OUTER LAYER I PRECURSOR VMO I VMOI;] [Vitelline membrane outer layer protein I (VOMI):Vitelline membrane outer layer protein I (VOMI);]	1	31.96	138	SINFRUG00000126561 (fru-miR-129-1)		dre-mir-129-1 dre-mir-181-1a dre-mir-181-1d dre-mir-181-1b dre-mir-181-1c		3' UCGUUCGGGUCUGGCGUUUUUC 5' dre-mir-129-1 __ |.||:|:|||.||||||||||| __ 5' AACAGGUCCA-ACCGCAAAAAG 3' ENSDART00000015822_P E:-31.959999 S:138.000000 Loc:2271 Cons: 85.71%(fru)
fru-mir-101-2b	ENSDART00000014970_P	ENSDARG00000005544	SINFRUG00000154592		ENSDARG00000005544 4001 (4001 nt) [BTB/POZ DOMAIN CONTAINING;] [BTB/POZ domain:BTB/POZ domain;]	1	24	137	SINFRUG00000154592 (fru-miR-101-2b)		fru-mir-101-2b dre-mir-101-2a		3' GAAGUCAAUAGUAUCAUGACAU 5' fru-mir-101-2b __ ||||||.|:.:||||||:|||| __ 5' CUUCAGCUGGUAUAGUAUUGUA 3' ENSDART00000014970_P E:-24 S:137.000000 Loc:1832 Cons: 77.27%(fru)
dre-mir-101-2a	ENSDART00000014970_P	ENSDARG00000005544	SINFRUG00000154592		ENSDARG00000005544 4001 (4001 nt) [BTB/POZ DOMAIN CONTAINING;] [BTB/POZ domain:BTB/POZ domain;]	1	24	137	SINFRUG00000154592 (dre-miR-101-2a)		fru-mir-101-2b dre-mir-101-2a		3' GAAGUCAAUAGUAUCAUGACAU 5' dre-mir-101-2a __ ||||||.|:.:||||||:|||| __ 5' CUUCAGCUGGUAUAGUAUUGUA 3' ENSDART00000014970_P E:-24 S:137.000000 Loc:1832 Cons: 77.27%(fru)
dre-mir-200b-1a	ENSDART00000022992_P	ENSDARG00000007174	SINFRUG00000137227		ENSDARG00000007174 4001 (4001 nt) [AMBIGUOUS;] []	1	28.82	137	SINFRUG00000137227 (dre-miR-200b-1a)		dre-mir-200b-1a		3' GUAGUAGU--AAUGGUCCGUCAUAAUCUU 5' dre-mir-200b-1a __ .|||||||....||||..|||||||:||| __ 5' GAUCAUCAGGAAACCACACAGUAUUGGAA 3' ENSDART00000022992_P E:-28.82 S:137.000000 Loc:1485 Cons: 72.41%(fru)
fru-mir-142-1b-as	ENSDART00000011434_P	ENSDARG00000012349	SINFRUG00000120849		ENSDARG00000012349 4001 (4001 nt) [EQUILIBRATIVE NUCLEOSIDE TRANSPORTER 2 EQUILIBRATIVE NITROBENZYLMERCAPTOPURINE RIBOSIDE INSENSITIVE NUCLEOSIDE TRANSPORTER EQUILIBRATIVE NBMPR INSENSITIVE NUCLEOSIDE TRANSPORTER NUCLEOSIDE TRANSPORTER EI TYPE 36 KDA NUCLEOLAR HNP36 HYDROPHOBIC NUCLEOLAR P;] [Delayed-early response protein/equilibrative nucleoside transporter:Delayed-early response protein/equili…	1	24.54	136	SINFRUG00000120849 (fru-miR-142-1b-as)		fru-mir-142-1b-as		3' GGUAU-UUCA--UCUUUCGUGAUGAUUU 5' fru-mir-142-1b-as __ |||||.||||..|.||||:||||:|:|| __ 5' CCAUAGAAGUACAAAAAGUACUAUUGAA 3' ENSDART00000011434_P E:-24.540001 S:136.000000 Loc:656 Cons: 71.43%(fru)
dre-mir-15-2a	ENSDART00000025247_P	ENSDARG00000008712	SINFRUG00000146645		ENSDARG00000008712 4001 (4001 nt) [N ACETYLTRANSFERASE;] [GCN5-related N-acetyltransferase:GCN5-related N-acetyltransferase;]	1	29.61	136	SINFRUG00000146645 (fru-miR-15-2a)		dre-mir-103-3b dre-mir-107-2 dre-mir-15-2a		3' AUGUUUGGUACUACACGACGAU 5' dre-mir-15-2a __ |::|:|||.|||||||:||||: __ 5' UGUAGACCUUGAUGUGUUGCUG 3' ENSDART00000025247_P E:-29.610001 S:136.000000 Loc:1763 Cons: 72.73%(fru)
dre-mir-17-1a	ENSDART00000014877_P	ENSDARG00000014891	SINFRUG00000128271		ROUNDABOUT HOMOLOG 2. [Source:RefSeq;Acc:NM_131633] ENSDARG00000014891 (1) (353113 353113 390493 390493 520006) 4001 (4001 nt) [ROUNDABOUT;] []	1	22.46	136	SINFRUG00000128271 (fru-miR-17-1a)		dre-mir-17-1a dre-mir-17-1c dre-mir-24-1	GO:0007186-> GO:0001584->rhodopsin-like receptor activity GO:0016021->integral to membrane	3' UGAUGGACGUGACAUUCGUGAAAC 5' dre-mir-17-1a __ |:||::|.||..|||||||:|||| __ 5' AUUAUUUACAGAGUAAGCAUUUUG 3' ENSDART00000014877_P E:-22.459999 S:136.000000 Loc:1345 Cons: 70.83%(fru)
dre-mir-let7l-a	ENSDART00000004351	ENSDARG00000008069	SINFRUG00000123021		ENSDARG00000008069 879 (879 nt) [UBIQUITIN CARBOXYL TERMINAL HYDROLASE 3 EC_3.1.2.15 UBIQUITIN THIOLESTERASE 3 UBIQUITIN SPECIFIC PROCESSING PROTEASE 3 DEUBIQUITINATING ENZYME 3; UBIQUITIN CARBOXYL TERMINAL HYDROLASE 3 EC_3.1.2.15 UBIQUITIN THIOLESTERASE 3 UBIQUITIN SPECIFIC PROCESSING PROTEASE 3 DEUBIQUITINATING ENZYME 3; UBIQUITIN CARBOXYL TERMINAL HYDROLASE 3 EC_3.1.2.15 UBIQUITIN THIOLESTERAS…	1	27.11	136	SINFRUG00000123021 (dre-miR-let7l-a)		dre-mir-98-3b dre-mir-98-2a dre-mir-98-3a dre-mir-let7l-a dre-mir-let7l-a1 dre-mir-let7l-a2 dre-mir-let7l-b1 dre-mir-let7l-c1 fru-mir-let7l-c2 dre-mir-let7l-d1 fru-mir-let7l-d2		3' UUGAUAUGUUGGAUGAUGGAGU 5' dre-mir-let7l-a __ ||||||:|||.:|::||||||| __ 5' AACUAUGCAAAUUGUUACCUCA 3' ENSDART00000004351 E:-27.110001 S:136.000000 Loc:801 Cons: 90.91%(fru)
dre-mir-let7l-b1	ENSDART00000004351	ENSDARG00000008069	SINFRUG00000123021		ENSDARG00000008069 879 (879 nt) [UBIQUITIN CARBOXYL TERMINAL HYDROLASE 3 EC_3.1.2.15 UBIQUITIN THIOLESTERASE 3 UBIQUITIN SPECIFIC PROCESSING PROTEASE 3 DEUBIQUITINATING ENZYME 3; UBIQUITIN CARBOXYL TERMINAL HYDROLASE 3 EC_3.1.2.15 UBIQUITIN THIOLESTERASE 3 UBIQUITIN SPECIFIC PROCESSING PROTEASE 3 DEUBIQUITINATING ENZYME 3; UBIQUITIN CARBOXYL TERMINAL HYDROLASE 3 EC_3.1.2.15 UBIQUITIN THIOLESTERAS…	1	27.11	136	SINFRUG00000123021 (dre-miR-let7l-b1)		dre-mir-98-3b dre-mir-98-2a dre-mir-98-3a dre-mir-let7l-a dre-mir-let7l-a1 dre-mir-let7l-a2 dre-mir-let7l-b1 dre-mir-let7l-c1 fru-mir-let7l-c2 dre-mir-let7l-d1 fru-mir-let7l-d2		3' UUGAUAUGUUGGAUGAUGGAGU 5' dre-mir-let7l-b1 __ ||||||:|||.:|::||||||| __ 5' AACUAUGCAAAUUGUUACCUCA 3' ENSDART00000004351 E:-27.110001 S:136.000000 Loc:801 Cons: 90.91%(fru)
dre-mir-let7l-c1	ENSDART00000004351	ENSDARG00000008069	SINFRUG00000123021		ENSDARG00000008069 879 (879 nt) [UBIQUITIN CARBOXYL TERMINAL HYDROLASE 3 EC_3.1.2.15 UBIQUITIN THIOLESTERASE 3 UBIQUITIN SPECIFIC PROCESSING PROTEASE 3 DEUBIQUITINATING ENZYME 3; UBIQUITIN CARBOXYL TERMINAL HYDROLASE 3 EC_3.1.2.15 UBIQUITIN THIOLESTERASE 3 UBIQUITIN SPECIFIC PROCESSING PROTEASE 3 DEUBIQUITINATING ENZYME 3; UBIQUITIN CARBOXYL TERMINAL HYDROLASE 3 EC_3.1.2.15 UBIQUITIN THIOLESTERAS…	1	27.11	136	SINFRUG00000123021 (fru-miR-let7l-c1)		dre-mir-98-3b dre-mir-98-2a dre-mir-98-3a dre-mir-let7l-a dre-mir-let7l-a1 dre-mir-let7l-a2 dre-mir-let7l-b1 dre-mir-let7l-c1 fru-mir-let7l-c2 dre-mir-let7l-d1 fru-mir-let7l-d2		3' UUGAUAUGUUGGAUGAUGGAGU 5' dre-mir-let7l-c1 __ ||||||:|||.:|::||||||| __ 5' AACUAUGCAAAUUGUUACCUCA 3' ENSDART00000004351 E:-27.110001 S:136.000000 Loc:801 Cons: 90.91%(fru)
fru-mir-let7l-c2	ENSDART00000004351	ENSDARG00000008069	SINFRUG00000123021		ENSDARG00000008069 879 (879 nt) [UBIQUITIN CARBOXYL TERMINAL HYDROLASE 3 EC_3.1.2.15 UBIQUITIN THIOLESTERASE 3 UBIQUITIN SPECIFIC PROCESSING PROTEASE 3 DEUBIQUITINATING ENZYME 3; UBIQUITIN CARBOXYL TERMINAL HYDROLASE 3 EC_3.1.2.15 UBIQUITIN THIOLESTERASE 3 UBIQUITIN SPECIFIC PROCESSING PROTEASE 3 DEUBIQUITINATING ENZYME 3; UBIQUITIN CARBOXYL TERMINAL HYDROLASE 3 EC_3.1.2.15 UBIQUITIN THIOLESTERAS…	1	27.11	136	SINFRUG00000123021 (fru-miR-let7l-c2)		dre-mir-98-3b dre-mir-98-2a dre-mir-98-3a dre-mir-let7l-a dre-mir-let7l-a1 dre-mir-let7l-a2 dre-mir-let7l-b1 dre-mir-let7l-c1 fru-mir-let7l-c2 dre-mir-let7l-d1 fru-mir-let7l-d2		3' UUGAUAUGUUGGAUGAUGGAGU 5' fru-mir-let7l-c2 __ ||||||:|||.:|::||||||| __ 5' AACUAUGCAAAUUGUUACCUCA 3' ENSDART00000004351 E:-27.110001 S:136.000000 Loc:801 Cons: 90.91%(fru)
dre-mir-let7l-d1	ENSDART00000004351	ENSDARG00000008069	SINFRUG00000123021		ENSDARG00000008069 879 (879 nt) [UBIQUITIN CARBOXYL TERMINAL HYDROLASE 3 EC_3.1.2.15 UBIQUITIN THIOLESTERASE 3 UBIQUITIN SPECIFIC PROCESSING PROTEASE 3 DEUBIQUITINATING ENZYME 3; UBIQUITIN CARBOXYL TERMINAL HYDROLASE 3 EC_3.1.2.15 UBIQUITIN THIOLESTERASE 3 UBIQUITIN SPECIFIC PROCESSING PROTEASE 3 DEUBIQUITINATING ENZYME 3; UBIQUITIN CARBOXYL TERMINAL HYDROLASE 3 EC_3.1.2.15 UBIQUITIN THIOLESTERAS…	1	27.11	136	SINFRUG00000123021 (fru-miR-let7l-d1)		dre-mir-98-3b dre-mir-98-2a dre-mir-98-3a dre-mir-let7l-a dre-mir-let7l-a1 dre-mir-let7l-a2 dre-mir-let7l-b1 dre-mir-let7l-c1 fru-mir-let7l-c2 dre-mir-let7l-d1 fru-mir-let7l-d2		3' UUGAUAUGUUGGAUGAUGGAGU 5' dre-mir-let7l-d1 __ ||||||:|||.:|::||||||| __ 5' AACUAUGCAAAUUGUUACCUCA 3' ENSDART00000004351 E:-27.110001 S:136.000000 Loc:801 Cons: 90.91%(fru)
fru-mir-let7l-d2	ENSDART00000004351	ENSDARG00000008069	SINFRUG00000123021		ENSDARG00000008069 879 (879 nt) [UBIQUITIN CARBOXYL TERMINAL HYDROLASE 3 EC_3.1.2.15 UBIQUITIN THIOLESTERASE 3 UBIQUITIN SPECIFIC PROCESSING PROTEASE 3 DEUBIQUITINATING ENZYME 3; UBIQUITIN CARBOXYL TERMINAL HYDROLASE 3 EC_3.1.2.15 UBIQUITIN THIOLESTERASE 3 UBIQUITIN SPECIFIC PROCESSING PROTEASE 3 DEUBIQUITINATING ENZYME 3; UBIQUITIN CARBOXYL TERMINAL HYDROLASE 3 EC_3.1.2.15 UBIQUITIN THIOLESTERAS…	1	27.11	136	SINFRUG00000123021 (fru-miR-let7l-d2)		dre-mir-98-3b dre-mir-98-2a dre-mir-98-3a dre-mir-let7l-a dre-mir-let7l-a1 dre-mir-let7l-a2 dre-mir-let7l-b1 dre-mir-let7l-c1 fru-mir-let7l-c2 dre-mir-let7l-d1 fru-mir-let7l-d2		3' UUGAUAUGUUGGAUGAUGGAGU 5' fru-mir-let7l-d2 __ ||||||:|||.:|::||||||| __ 5' AACUAUGCAAAUUGUUACCUCA 3' ENSDART00000004351 E:-27.110001 S:136.000000 Loc:801 Cons: 90.91%(fru)
dre-mir-138-2	ENSDART00000021370_P	ENSDARG00000002720	SINFRUG00000140650		ENSDARG00000002720 4001 (4001 nt) [AMBIGUOUS;] [G-protein beta WD-40 repeat:G-protein beta WD-40 repeat;]	1	32.05	135	SINFRUG00000140650 (dre-miR-138-2)		dre-mir-138-1 dre-mir-138-2		3' GGGACUAAGUGUUGUGGUCGA 5' dre-mir-138-2 __ :|||||..|||||||:||||| __ 5' UCCUGAACCACAACAUCAGCU 3' ENSDART00000021370_P E:-32.049999 S:135.000000 Loc:422 Cons: 71.43%(fru)
dre-mir-196-1a	ENSDART00000002884_P	ENSDARG00000016658	SINFRUG00000146328		ENSDARG00000016658 4001 (4001 nt) [HOMEOBOX; HOMEOBOX;] [Homeobox:Homeobox; Homeobox protein, antennapedia type:Homeobox protein, antennapedia type; Homeobox:Homeobox; Homeobox protein, antennapedia type:Homeobox protein, antennapedia type; Helix-turn-helix motif, lambda-like repressor:Helix-turn-helix motif, lambda-like repressor;]	1	28.61	135	SINFRUG00000146328 (fru-miR-196-1a)		dre-mir-16-2 fru-mir-17-1e-as dre-mir-196-1c dre-mir-196-1a dre-mir-196-1e dre-mir-196-1d dre-mir-196-1b		3' GGUUGUUGUAGUUUGAUGGAU 5' dre-mir-196-1a __ ||||||||.|:|||||:|||| __ 5' CCAACAAC-UUAAACUGCCUA 3' ENSDART00000002884_P E:-28.610001 S:135.000000 Loc:937 Cons: 95.00%(fru)
dre-mir-1-1a	ENSDART00000004675_P	ENSDARG00000016567	SINFRUG00000149856		ENSDARG00000016567 4001 (4001 nt) [MULTIDRUG RESISTANCE P GLYCOPROTEIN; MULTIDRUG RESISTANCE P GLYCOPROTEIN; MULTIDRUG RESISTANCE P GLYCOPROTEIN; MULTIDRUG RESISTANCE P GLYCOPROTEIN;] [ABC transporter:ABC transporter; ABC transporter, transmembrane region:ABC transporter, transmembrane region; ABC transporter:ABC transporter; ABC transporter, transmembrane region:ABC transporter, transmembrane re…	1	21.27	135	SINFRUG00000149856 (fru-miR-1-1a)		dre-mir-1-1a dre-mir-1 dre-mir-22-1 fru-mir-22-1a		3' UAUGU-AUGAAGAAAUGUAAGGU 5' dre-mir-1-1a __ :.|||.||:||:||||||||:|| __ 5' GAACAUUAUUUUUUUACAUUUCA 3' ENSDART00000004675_P E:-21.27 S:135.000000 Loc:1982 Cons: 78.26%(fru)
dre-mir-1	ENSDART00000004675_P	ENSDARG00000016567	SINFRUG00000149856		ENSDARG00000016567 4001 (4001 nt) [MULTIDRUG RESISTANCE P GLYCOPROTEIN; MULTIDRUG RESISTANCE P GLYCOPROTEIN; MULTIDRUG RESISTANCE P GLYCOPROTEIN; MULTIDRUG RESISTANCE P GLYCOPROTEIN;] [ABC transporter:ABC transporter; ABC transporter, transmembrane region:ABC transporter, transmembrane region; ABC transporter:ABC transporter; ABC transporter, transmembrane region:ABC transporter, transmembrane re…	1	21.27	135	SINFRUG00000149856 (fru-miR-1)		dre-mir-1-1a dre-mir-1 dre-mir-22-1 fru-mir-22-1a		3' UAUGU-AUGAAGAAAUGUAAGGU 5' dre-mir-1 __ :.|||.||:||:||||||||:|| __ 5' GAACAUUAUUUUUUUACAUUUCA 3' ENSDART00000004675_P E:-21.27 S:135.000000 Loc:1982 Cons: 78.26%(fru)
dre-mir-34-3b	ENSDART00000025518_P	ENSDARG00000019307	SINFRUG00000136907		ENSDARG00000019307 4001 (4001 nt) [DUAL SPECIFICITY PHOSPHATASE EC_3.1.3.48 EC_3.1.3.- 16 MAP KINASE PHOSPHATASE MKP; DUAL SPECIFICITY PHOSPHATASE EC_3.1.3.48 EC_3.1.3.- 16 MAP KINASE PHOSPHATASE MKP;] [Dual specificity protein phosphatase:Dual specificity protein phosphatase; Dual specificity protein phosphatase:Dual specificity protein phosphatase;]	1	29.14	135	SINFRUG00000136907 (dre-miR-34-3b)		dre-mir-34-3b		3' CAUUAGUUGAUUGACGUGACGGA 5' dre-mir-34-3b __ ..|:||.|.|||||||:|||||| __ 5' UGAGUCCAAUAACUGCGCUGCCU 3' ENSDART00000025518_P E:-29.139999 S:135.000000 Loc:149 Cons: 91.30%(fru)
dre-mir-196-1c	ENSDART00000022987_P	ENSDARG00000011573	SINFRUG00000139816		ENSDARG00000011573 4001 (4001 nt) [MULTIDRUG RESISTANCE P GLYCOPROTEIN;] [ABC transporter:ABC transporter; ABC transporter, transmembrane region:ABC transporter, transmembrane region;]	1	27.78	135	SINFRUG00000139816 (dre-miR-196-1c)		dre-mir-172 dre-mir-196-1a dre-mir-196-1c dre-mir-196-1b		3' GGUUGUUGUACUUUGAUGGAU 5' dre-mir-196-1c __ .||:|:|.||||||||:|||| __ 5' ACAGCGAAAUGAAACUGCCUA 3' ENSDART00000022987_P E:-27.780001 S:135.000000 Loc:692 Cons: 71.43%(fru)
dre-mir-196-1b	ENSDART00000022987_P	ENSDARG00000011573	SINFRUG00000139816		ENSDARG00000011573 4001 (4001 nt) [MULTIDRUG RESISTANCE P GLYCOPROTEIN;] [ABC transporter:ABC transporter; ABC transporter, transmembrane region:ABC transporter, transmembrane region;]	1	27.78	135	SINFRUG00000139816 (fru-miR-196-1b)		dre-mir-172 dre-mir-196-1a dre-mir-196-1c dre-mir-196-1b		3' GGUUGUUGUACUUUGAUGGAU 5' dre-mir-196-1b __ .||:|:|.||||||||:|||| __ 5' ACAGCGAAAUGAAACUGCCUA 3' ENSDART00000022987_P E:-27.780001 S:135.000000 Loc:692 Cons: 71.43%(fru)
dre-mir-34-2b	ENSDART00000026254_P	ENSDARG00000015224	SINFRUG00000144978		ENSDARG00000015224 4001 (4001 nt) [CD2 ASSOCIATED WITH SH3 DOMAINS;] [Neutrophil cytosol factor 2:Neutrophil cytosol factor 2; SH3 domain:SH3 domain;]	1	24.77	134	SINFRUG00000144978 (dre-miR-34-2b)		dre-mir-27-3a dre-mir-34-2b dre-mir-34-3a dre-mir-98-1a		3' UGUUAGUCGAUUGUUGUGACGGA 5' dre-mir-34-2b __ |:||.||.|||||||:||||:|| __ 5' AUAAACA-CUAACAAUACUGUCU 3' ENSDART00000026254_P E:-24.77 S:134.000000 Loc:197 Cons: 72.73%(fru)
dre-mir-34-3a	ENSDART00000026254_P	ENSDARG00000015224	SINFRUG00000144978		ENSDARG00000015224 4001 (4001 nt) [CD2 ASSOCIATED WITH SH3 DOMAINS;] [Neutrophil cytosol factor 2:Neutrophil cytosol factor 2; SH3 domain:SH3 domain;]	1	24.77	134	SINFRUG00000144978 (dre-miR-34-3a)		dre-mir-27-3a dre-mir-34-2b dre-mir-34-3a dre-mir-98-1a		3' UGUUAGUCGAUUGUUGUGACGGA 5' dre-mir-34-3a __ |:||.||.|||||||:||||:|| __ 5' AUAAACA-CUAACAAUACUGUCU 3' ENSDART00000026254_P E:-24.77 S:134.000000 Loc:197 Cons: 72.73%(fru)
dre-mir-138-1	ENSDART00000021370_P	ENSDARG00000002720	SINFRUG00000140650		ENSDARG00000002720 4001 (4001 nt) [AMBIGUOUS;] [G-protein beta WD-40 repeat:G-protein beta WD-40 repeat;]	1	31.84	133	SINFRUG00000140650 (fru-miR-138-1)		dre-mir-138-1 dre-mir-138-2		3' CGGACUAAGUGUUGUGGUCGA 5' dre-mir-138-1 __ .|||||..|||||||:||||| __ 5' UCCUGAACCACAACAUCAGCU 3' ENSDART00000021370_P E:-31.84 S:133.000000 Loc:423 Cons: 71.43%(fru)
dre-mir-130-2a	ENSDART00000009466_P	ENSDARG00000008250	SINFRUG00000128153		ENSDARG00000008250 4001 (4001 nt) [RAS;] [Ras GTPase superfamily:Ras GTPase superfamily;]	1	25.52	133	SINFRUG00000128153 (dre-miR-130-2a)		dre-mir-130-2a		3' UACG---GGAAAGUAAUAACGUGAC 5' dre-mir-130-2a __ ||||...|||||..||||||||||| __ 5' AUGCAUGCCUUU--UUAUUGCACUG 3' ENSDART00000009466_P E:-25.52 S:133.000000 Loc:631 Cons: 73.91%(fru)
dre-mir-130-2a	ENSDART00000027330_P	ENSDARG00000014641	SINFRUG00000142580		ENSDARG00000014641 4001 (4001 nt) [AMBIGUOUS;] [Pleckstrin-like:Pleckstrin-like;]	1	21.56	133	SINFRUG00000120704 (dre-miR-130-2a)		dre-mir-130-2a dre-mir-135-2a dre-mir-135-2b		3' UACGGGAAAGUAAUAACGUGAC 5' dre-mir-130-2a __ :|||.:||.||||||||||||. __ 5' GUGCAUUUACAUUAUUGCACUU 3' ENSDART00000027330_P E:-21.559999 S:133.000000 Loc:383 Cons: 77.27%(fru)
dre-mir-200a-1a	ENSDART00000026530_P	ENSDARG00000001989	SINFRUG00000137519		ENSDARG00000001989 3003 (3003 nt) [GAP JUNCTION CONNEXIN;] [Connexins:Connexins;]	1	22.91	133	SINFRUG00000137519 (fru-miR-200a-1a)		dre-mir-200a-1a		3' UUUGUAG--CAAUGGUCU-GUCACAAUCUU 5' dre-mir-200a-1a __ |||::||..|.|.:.|||.||||||||||: __ 5' AAAUGUCUGGAUUUAAGAUCAGUGUUAGAG 3' ENSDART00000026530_P E:-22.91 S:133.000000 Loc:1314 Cons: 70.00%(fru)
dre-mir-130-1b	ENSDART00000004579_P	ENSDARG00000021010	SINFRUG00000135500		ENSDARG00000021010 4001 (4001 nt) [UNKNOWN; UNKNOWN; UNKNOWN;] []	1	26.68	133	SINFRUG00000135500 (dre-miR-130-1b)		dre-mir-103-2a dre-mir-103-1a dre-mir-107-1b dre-mir-130-1c dre-mir-130-1b dre-mir-130-1a dre-mir-18-2b dre-mir-18-1 fru-mir-18-1b dre-mir-18-2 fru-mir-18-1a dre-mir-181-1a dre-mir-181-1d dre-mir-181-1b dre-mir-181-1c		3' UACGGGAAAAUUGUAACGUGAC 5' dre-mir-130-1b __ :.||::|||||||.|||||||| __ 5' GAGCUUUUUUAACUUUGCACUG 3' ENSDART00000004579_P E:-26.68 S:133.000000 Loc:2707 Cons: 100.00%(fru)
fru-mir-30c	ENSDART00000012067_P	ENSDARG00000004824	SINFRUG00000155199		ENSDARG00000004824 4001 (4001 nt) [SET 2; SET 2;] [HMG1/2 (high mobility group) box:HMG1/2 (high mobility group) box; Zn-finger-like, PHD finger:Zn-finger-like, PHD finger; Nuclear protein SET:Nuclear protein SET; HMG1/2 (high mobility group) box:HMG1/2 (high mobility group) box; Zn-finger-like, PHD finger:Zn-finger-like, PHD finger;]	1	23.61	133	SINFRUG00000155199 (fru-miR-30c)		fru-mir-30c		3' CGAC-UCUCACAUCCUACAAAUGU 5' fru-mir-30c __ |.||.|||.|||.||||||||||| __ 5' GGUGAAGAUUGU-GGAUGUUUACA 3' ENSDART00000012067_P E:-23.610001 S:133.000000 Loc:2731 Cons: 73.91%(fru)
dre-mir-let7l-a1	ENSDART00000004351	ENSDARG00000008069	SINFRUG00000123021		ENSDARG00000008069 879 (879 nt) [UBIQUITIN CARBOXYL TERMINAL HYDROLASE 3 EC_3.1.2.15 UBIQUITIN THIOLESTERASE 3 UBIQUITIN SPECIFIC PROCESSING PROTEASE 3 DEUBIQUITINATING ENZYME 3; UBIQUITIN CARBOXYL TERMINAL HYDROLASE 3 EC_3.1.2.15 UBIQUITIN THIOLESTERASE 3 UBIQUITIN SPECIFIC PROCESSING PROTEASE 3 DEUBIQUITINATING ENZYME 3; UBIQUITIN CARBOXYL TERMINAL HYDROLASE 3 EC_3.1.2.15 UBIQUITIN THIOLESTERAS…	1	26.42	133	SINFRUG00000123021 (dre-miR-let7l-a1)		dre-mir-98-3b dre-mir-98-2a dre-mir-98-3a dre-mir-let7l-a dre-mir-let7l-a1 dre-mir-let7l-a2 dre-mir-let7l-b1 dre-mir-let7l-c1 fru-mir-let7l-c2 dre-mir-let7l-d1 fru-mir-let7l-d2		3' UUGGUAUGUUGGAUGAUGGAGU 5' dre-mir-let7l-a1 __ |||:||:|||.:|::||||||| __ 5' AACUAUGCAAAUUGUUACCUCA 3' ENSDART00000004351 E:-26.42 S:133.000000 Loc:801 Cons: 90.91%(fru)
dre-mir-let7l-a2	ENSDART00000004351	ENSDARG00000008069	SINFRUG00000123021		ENSDARG00000008069 879 (879 nt) [UBIQUITIN CARBOXYL TERMINAL HYDROLASE 3 EC_3.1.2.15 UBIQUITIN THIOLESTERASE 3 UBIQUITIN SPECIFIC PROCESSING PROTEASE 3 DEUBIQUITINATING ENZYME 3; UBIQUITIN CARBOXYL TERMINAL HYDROLASE 3 EC_3.1.2.15 UBIQUITIN THIOLESTERASE 3 UBIQUITIN SPECIFIC PROCESSING PROTEASE 3 DEUBIQUITINATING ENZYME 3; UBIQUITIN CARBOXYL TERMINAL HYDROLASE 3 EC_3.1.2.15 UBIQUITIN THIOLESTERAS…	1	26.42	133	SINFRUG00000123021 (dre-miR-let7l-a2)		dre-mir-98-3b dre-mir-98-2a dre-mir-98-3a dre-mir-let7l-a dre-mir-let7l-a1 dre-mir-let7l-a2 dre-mir-let7l-b1 dre-mir-let7l-c1 fru-mir-let7l-c2 dre-mir-let7l-d1 fru-mir-let7l-d2		3' UUGGUAUGUUGGAUGAUGGAGU 5' dre-mir-let7l-a2 __ |||:||:|||.:|::||||||| __ 5' AACUAUGCAAAUUGUUACCUCA 3' ENSDART00000004351 E:-26.42 S:133.000000 Loc:801 Cons: 90.91%(fru)
fru-mir-93-2b	ENSDART00000016106_P	ENSDARG00000017383	SINFRUG00000129775		ENSDARG00000017383 4001 (4001 nt) [GLUTAMINE SYNTHETASE EC_6.3.1.2 GLUTAMATE AMMONIA LIGASE; GLUTAMINE SYNTHETASE EC_6.3.1.2 GLUTAMATE AMMONIA LIGASE;] [Glutamine synthetase, catalytic domain:Glutamine synthetase, catalytic domain; Glutamine synthetase, beta-Grasp domain:Glutamine synthetase, beta-Grasp domain; Glutamine synthetase, catalytic domain:Glutamine synthetase, catalytic domain; Glutami…	1	24.11	132	SINFRUG00000129775 (fru-miR-93-2b)		dre-mir-20-2a dre-mir-20-2b fru-mir-93-2b		3' GAUGGACGUGACAUUCGUGAAAC 5' fru-mir-93-2b __ ||.:|||||.|.||||||:|||| __ 5' CUCUCUGCA-UCUAAGCAUUUUG 3' ENSDART00000016106_P E:-24.110001 S:132.000000 Loc:2118 Cons: 72.73%(fru)
dre-mir-93	ENSDART00000002085_P	ENSDARG00000012697	SINFRUG00000148676		ENSDARG00000012697 4001 (4001 nt) [HOMEOBOX MOX 2 GROWTH ARREST SPECIFIC HOMEOBOX;] [Homeobox:Homeobox; Helix-turn-helix motif, lambda-like repressor:Helix-turn-helix motif, lambda-like repressor;]	1	24.95	132	SINFRUG00000148676 (dre-miR-93)		dre-mir-27-3a dre-mir-27-1a dre-mir-93		3' GAUG-GACGUGUUUGUCGUGAAA 5' dre-mir-93 __ :|:|.|||:.:|||||||||||| __ 5' UUGCUCUGU-UAAACAGCACUUU 3' ENSDART00000002085_P E:-24.950001 S:132.000000 Loc:1883 Cons: 72.73%(fru)
dre-mir-21-1a	ENSDART00000019501_P	ENSDARG00000015350	SINFRUG00000129275		ENSDARG00000015350 4001 (4001 nt) [AUTOANTIGEN NGP 1;] [GTP1/OBG:GTP1/OBG; GTP-binding protein, HSR1-related:GTP-binding protein, HSR1-related;]	1	29.57	132	SINFRUG00000129275 (fru-miR-21-1a)		dre-mir-187 dre-mir-21-1a dre-mir-21-1b fru-mir-21-1c		3' GGUUGUGGUCAGACUAUUCGAU 5' dre-mir-21-1a __ :::|||||.|||||||:||||. __ 5' UUGACACCUGUCUGAUGAGCUC 3' ENSDART00000019501_P E:-29.57 S:132.000000 Loc:2756 Cons: 77.27%(fru)
dre-mir-21-1b	ENSDART00000019501_P	ENSDARG00000015350	SINFRUG00000129275		ENSDARG00000015350 4001 (4001 nt) [AUTOANTIGEN NGP 1;] [GTP1/OBG:GTP1/OBG; GTP-binding protein, HSR1-related:GTP-binding protein, HSR1-related;]	1	29.57	132	SINFRUG00000129275 (fru-miR-21-1b)		dre-mir-187 dre-mir-21-1a dre-mir-21-1b fru-mir-21-1c		3' GGUUGUGGUCAGACUAUUCGAU 5' dre-mir-21-1b __ :::|||||.|||||||:||||. __ 5' UUGACACCUGUCUGAUGAGCUC 3' ENSDART00000019501_P E:-29.57 S:132.000000 Loc:2756 Cons: 77.27%(fru)
fru-mir-21-1c	ENSDART00000019501_P	ENSDARG00000015350	SINFRUG00000129275		ENSDARG00000015350 4001 (4001 nt) [AUTOANTIGEN NGP 1;] [GTP1/OBG:GTP1/OBG; GTP-binding protein, HSR1-related:GTP-binding protein, HSR1-related;]	1	29.57	132	SINFRUG00000129275 (fru-miR-21-1c)		dre-mir-187 dre-mir-21-1a dre-mir-21-1b fru-mir-21-1c		3' GGUUGUGGUCAGACUAUUCGAU 5' fru-mir-21-1c __ :::|||||.|||||||:||||. __ 5' UUGACACCUGUCUGAUGAGCUC 3' ENSDART00000019501_P E:-29.57 S:132.000000 Loc:2756 Cons: 77.27%(fru)
dre-mir-196-1e	ENSDART00000022846_P	ENSDARG00000016123	SINFRUG00000146591		ENSDARG00000016123 4001 (4001 nt) [AMBIGUOUS; AMBIGUOUS;] []	1	24.25	132	SINFRUG00000146591 (dre-miR-196-1e)		dre-mir-196-1c dre-mir-196-1d dre-mir-196-1a dre-mir-196-1b dre-mir-196-1e		3' GGUUGUU---GUA--UUUUGAUGGAU 5' dre-mir-196-1e __ |||||||...|||..|||:||||||| __ 5' CCAACAACUACAUAAAAAGCUACCUA 3' ENSDART00000022846_P E:-24.25 S:132.000000 Loc:458 Cons: 73.08%(fru)
dre-mir-34-2b	ENSDART00000006158_P	ENSDARG00000009310	SINFRUG00000153582		ENSDARG00000009310 4001 (4001 nt) [SIMILAR TO H14 GENE;] []	1	26.48	132	SINFRUG00000153582 (dre-miR-34-2b)		dre-mir-34-2b dre-mir-34-3a		3' UGUUAGUCGAUUGUUGUGACGGA 5' dre-mir-34-2b __ |||||:||.||||||||:||.|| __ 5' ACAAUUAG-UAACAACAUUGGCU 3' ENSDART00000006158_P E:-26.48 S:132.000000 Loc:678 Cons: 72.73%(fru)
dre-mir-34-3a	ENSDART00000006158_P	ENSDARG00000009310	SINFRUG00000153582		ENSDARG00000009310 4001 (4001 nt) [SIMILAR TO H14 GENE;] []	1	26.48	132	SINFRUG00000153582 (dre-miR-34-3a)		dre-mir-34-2b dre-mir-34-3a		3' UGUUAGUCGAUUGUUGUGACGGA 5' dre-mir-34-3a __ |||||:||.||||||||:||.|| __ 5' ACAAUUAG-UAACAACAUUGGCU 3' ENSDART00000006158_P E:-26.48 S:132.000000 Loc:678 Cons: 72.73%(fru)
dre-mir-31	ENSDART00000026210_P	ENSDARG00000017882	SINFRUG00000140253		ENSDARG00000017882 4001 (4001 nt) [BETA DEHYDROGENASE 2 BETA 2 BETA HYDROXYSTEROID DEHYDROGENASE;] [Glucose/ribitol dehydrogenase:Glucose/ribitol dehydrogenase; Short-chain dehydrogenase/reductase SDR:Short-chain dehydrogenase/reductase SDR; 2,3-dihydro-2,3-dihydroxybenzoate dehydrogenase:2,3-dihydro-2,3-dihydroxybenzoate dehydrogenase;]	1	25.53	132	SINFRUG00000140253 (dre-miR-31)		dre-mir-31		3' GUCG-AUACGGUUGUAGAACGGU 5' dre-mir-31 __ ||||.|||..:|||||||||:|| __ 5' CAGCGUAUUAUAACAUCUUGUCA 3' ENSDART00000026210_P E:-25.530001 S:132.000000 Loc:361 Cons: 73.91%(fru)
dre-mir-184	ENSDART00000012255_P	ENSDARG00000019381	SINFRUG00000121098		ENSDARG00000019381 4001 (4001 nt) [INTERFERON;] [Interferon-inducible GTPase:Interferon-inducible GTPase;]	1	28.55	132	SINFRUG00000121098 (dre-miR-184)		dre-mir-184		3' CGGGAAUAGUCAAGAGGCAGGU 5' dre-mir-184 __ ||||.|||:..|||||:||||| __ 5' GCCCAUAUUUUUUCUCUGUCCA 3' ENSDART00000012255_P E:-28.549999 S:132.000000 Loc:723 Cons: 72.73%(fru)
dre-mir-103-1a	ENSDART00000004259_P	ENSDARG00000003042	SINFRUG00000152186		ENSDARG00000003042 4001 (4001 nt) [RIBOSOMAL S6 KINASE ALPHA EC_2.7.1.37 S6K ALPHA KDA RIBOSOMAL S6 KINASE P90 RSK RIBOSOMAL S6 KINASE RSK; RIBOSOMAL S6 KINASE ALPHA EC_2.7.1.37 S6K ALPHA KDA RIBOSOMAL S6 KINASE P90 RSK RIBOSOMAL S6 KINASE RSK; RIBOSOMAL S6 KINASE ALPHA EC_2.7.1.37 S6K ALPHA KDA RIBOSOMAL S6 KINASE P90 RSK RIBOSOMAL S6 KINASE RSK;] [Tyrosine protein kinase:Tyrosine protein kinase…	1	30.2	132	SINFRUG00000152186 (fru-miR-103-1a)		dre-mir-103-1a dre-mir-103-2a dre-mir-107-1b		3' AGUAUCGGGACAUGUUACGAC-GA 5' dre-mir-103-1a __ .|||:|.::||||||||||||.|| __ 5' GCAUGGAUUUGUACAAUGCUGUCU 3' ENSDART00000004259_P E:-30.200001 S:132.000000 Loc:677 Cons: 70.83%(fru)
dre-mir-103-2a	ENSDART00000004259_P	ENSDARG00000003042	SINFRUG00000152186		ENSDARG00000003042 4001 (4001 nt) [RIBOSOMAL S6 KINASE ALPHA EC_2.7.1.37 S6K ALPHA KDA RIBOSOMAL S6 KINASE P90 RSK RIBOSOMAL S6 KINASE RSK; RIBOSOMAL S6 KINASE ALPHA EC_2.7.1.37 S6K ALPHA KDA RIBOSOMAL S6 KINASE P90 RSK RIBOSOMAL S6 KINASE RSK; RIBOSOMAL S6 KINASE ALPHA EC_2.7.1.37 S6K ALPHA KDA RIBOSOMAL S6 KINASE P90 RSK RIBOSOMAL S6 KINASE RSK;] [Tyrosine protein kinase:Tyrosine protein kinase…	1	30.2	132	SINFRUG00000152186 (fru-miR-103-2a)		dre-mir-103-1a dre-mir-103-2a dre-mir-107-1b		3' AGUAUCGGGACAUGUUACGAC-GA 5' dre-mir-103-2a __ .|||:|.::||||||||||||.|| __ 5' GCAUGGAUUUGUACAAUGCUGUCU 3' ENSDART00000004259_P E:-30.200001 S:132.000000 Loc:677 Cons: 70.83%(fru)
dre-mir-107-1b	ENSDART00000004259_P	ENSDARG00000003042	SINFRUG00000152186		ENSDARG00000003042 4001 (4001 nt) [RIBOSOMAL S6 KINASE ALPHA EC_2.7.1.37 S6K ALPHA KDA RIBOSOMAL S6 KINASE P90 RSK RIBOSOMAL S6 KINASE RSK; RIBOSOMAL S6 KINASE ALPHA EC_2.7.1.37 S6K ALPHA KDA RIBOSOMAL S6 KINASE P90 RSK RIBOSOMAL S6 KINASE RSK; RIBOSOMAL S6 KINASE ALPHA EC_2.7.1.37 S6K ALPHA KDA RIBOSOMAL S6 KINASE P90 RSK RIBOSOMAL S6 KINASE RSK;] [Tyrosine protein kinase:Tyrosine protein kinase…	1	30.2	132	SINFRUG00000152186 (fru-miR-107-1b)		dre-mir-103-1a dre-mir-103-2a dre-mir-107-1b		3' AGUAUCGGGACAUGUUACGAC-GA 5' dre-mir-107-1b __ .|||:|.::||||||||||||.|| __ 5' GCAUGGAUUUGUACAAUGCUGUCU 3' ENSDART00000004259_P E:-30.200001 S:132.000000 Loc:677 Cons: 70.83%(fru)
dre-mir-24-1	ENSDART00000012245_P	ENSDARG00000021116	SINFRUG00000138217		ENSDARG00000021116 4001 (4001 nt) [REGULATOR OF CYTOKINESIS 1;] [MAP65/ASE1:MAP65/ASE1;]	1	29.76	131	SINFRUG00000134795 (fru-miR-24-1)		dre-mir-139 dre-mir-23-b1 dre-mir-24-1 dre-mir-98-3a dre-mir-98-3b		3' GACAAGGACGACUUGACUCGGU 5' dre-mir-24-1 __ |||.|.|||.|||||||||||| __ 5' CUGCU-CUG-UGAACUGAGCCA 3' ENSDART00000012245_P E:-29.76 S:131.000000 Loc:962 Cons: 70.00%(fru)
fru-mir-33-1a	ENSDART00000006319_P	ENSDARG00000017439	SINFRUG00000155539		ENSDARG00000017439 4001 (4001 nt) [EUKARYOTIC TRANSLATION INITIATION FACTOR 4B EIF 4B;] [RNA-binding region RNP-1 (RNA recognition motif):RNA-binding region RNP-1 (RNA recognition motif);]	1	27.41	131	SINFRUG00000155539 (fru-miR-33-1a)		fru-mir-33-1a fru-mir-33b fru-mir-33-1b		3' GUUACGUUGAUGUUACGUGGU 5' fru-mir-33-1a __ :.||||.|||||||||:|||| __ 5' UCAUGC-ACUACAAUGUACCA 3' ENSDART00000006319_P E:-27.41 S:131.000000 Loc:1710 Cons: 70.00%(fru)
fru-mir-33b	ENSDART00000006319_P	ENSDARG00000017439	SINFRUG00000155539		ENSDARG00000017439 4001 (4001 nt) [EUKARYOTIC TRANSLATION INITIATION FACTOR 4B EIF 4B;] [RNA-binding region RNP-1 (RNA recognition motif):RNA-binding region RNP-1 (RNA recognition motif);]	1	27.41	131	SINFRUG00000155539 (fru-miR-33b)		fru-mir-33-1a fru-mir-33b fru-mir-33-1b		3' GUUACGUUGAUGUUACGUGGU 5' fru-mir-33b __ :.||||.|||||||||:|||| __ 5' UCAUGC-ACUACAAUGUACCA 3' ENSDART00000006319_P E:-27.41 S:131.000000 Loc:1710 Cons: 70.00%(fru)
fru-mir-33-1b	ENSDART00000006319_P	ENSDARG00000017439	SINFRUG00000155539		ENSDARG00000017439 4001 (4001 nt) [EUKARYOTIC TRANSLATION INITIATION FACTOR 4B EIF 4B;] [RNA-binding region RNP-1 (RNA recognition motif):RNA-binding region RNP-1 (RNA recognition motif);]	1	27.41	131	SINFRUG00000155539 (fru-miR-33-1b)		fru-mir-33-1a fru-mir-33b fru-mir-33-1b		3' GUUACGUUGAUGUUACGUGGU 5' fru-mir-33-1b __ :.||||.|||||||||:|||| __ 5' UCAUGC-ACUACAAUGUACCA 3' ENSDART00000006319_P E:-27.41 S:131.000000 Loc:1710 Cons: 70.00%(fru)
fru-mir-204-1b	ENSDART00000026224_P	ENSDARG00000005519	SINFRUG00000145244		ENSDARG00000005519 4001 (4001 nt) [AMBIGUOUS; AMBIGUOUS;] [Proline-rich extensin:Proline-rich extensin; Proline-rich extensin:Proline-rich extensin;]	1	30.35	131	SINFRUG00000145243 (fru-miR-204-1b)		dre-mir-15-2a dre-mir-16-2 fru-mir-17-1e dre-mir-187 fru-mir-204-1a fru-mir-204-1b dre-mir-204		3' GUCCGUAUCC-UACUGUUUCCCUU 5' fru-mir-204-1b __ :|||.:|.||.:||:||||||||| __ 5' UAGGGGUUGGUGUGGCAAAGGGAA 3' ENSDART00000026224_P E:-30.35 S:131.000000 Loc:2580 Cons: 79.17%(fru)
dre-mir-204	ENSDART00000026224_P	ENSDARG00000005519	SINFRUG00000145244		ENSDARG00000005519 4001 (4001 nt) [AMBIGUOUS; AMBIGUOUS;] [Proline-rich extensin:Proline-rich extensin; Proline-rich extensin:Proline-rich extensin;]	1	30.35	131	SINFRUG00000145243 (dre-miR-204)		dre-mir-15-2a dre-mir-16-2 fru-mir-17-1e dre-mir-187 fru-mir-204-1a fru-mir-204-1b dre-mir-204		3' GUCCGUAUCC-UACUGUUUCCCUU 5' dre-mir-204 __ :|||.:|.||.:||:||||||||| __ 5' UAGGGGUUGGUGUGGCAAAGGGAA 3' ENSDART00000026224_P E:-30.35 S:131.000000 Loc:2580 Cons: 79.17%(fru)
dre-mir-196-1b	ENSDART00000022483	ENSDARG00000005590	SINFRUG00000128213		ENSDARG00000005590 798 (798 nt) [METAL RESPONSE ELEMENT BINDING TRANSCRIPTION FACTOR 2 METAL RESPONSE ELEMENT DNA BINDING M96; METAL RESPONSE ELEMENT BINDING TRANSCRIPTION FACTOR 2 METAL RESPONSE ELEMENT DNA BINDING M96;] [Zn-finger-like, PHD finger:Zn-finger-like, PHD finger; HMG-I and HMG-Y DNA-binding domain (A+T-hook):HMG-I and HMG-Y DNA-binding domain (A+T-hook); Zn-finger-like, PHD finger:Z…	1	25.88	131	SINFRUG00000128213 (fru-miR-196-1b)		dre-mir-196-1a dre-mir-196-1e dre-mir-196-1b dre-mir-196-1c		3' GGUUGUUGU-ACUUUGAUGGAU 5' dre-mir-196-1b __ |||:||.||.|||||||||||. __ 5' CCAGCACCAGUGAAACUACCUC 3' ENSDART00000022483 E:-25.879999 S:131.000000 Loc:364 Cons: 72.73%(fru)
dre-mir-196-1c	ENSDART00000022483	ENSDARG00000005590	SINFRUG00000128213		ENSDARG00000005590 798 (798 nt) [METAL RESPONSE ELEMENT BINDING TRANSCRIPTION FACTOR 2 METAL RESPONSE ELEMENT DNA BINDING M96; METAL RESPONSE ELEMENT BINDING TRANSCRIPTION FACTOR 2 METAL RESPONSE ELEMENT DNA BINDING M96;] [Zn-finger-like, PHD finger:Zn-finger-like, PHD finger; HMG-I and HMG-Y DNA-binding domain (A+T-hook):HMG-I and HMG-Y DNA-binding domain (A+T-hook); Zn-finger-like, PHD finger:Z…	1	25.88	131	SINFRUG00000128213 (dre-miR-196-1c)		dre-mir-196-1a dre-mir-196-1e dre-mir-196-1b dre-mir-196-1c		3' GGUUGUUGU-ACUUUGAUGGAU 5' dre-mir-196-1c __ |||:||.||.|||||||||||. __ 5' CCAGCACCAGUGAAACUACCUC 3' ENSDART00000022483 E:-25.879999 S:131.000000 Loc:364 Cons: 72.73%(fru)
dre-mir-172	ENSDART00000020954_P	ENSDARG00000010668	SINFRUG00000142593		ENSDARG00000010668 4001 (4001 nt) [METHYLMALONYL COA EPIMERASE;] [Glyoxalase/Bleomycin resistance protein/dioxygenase domain:Glyoxalase/Bleomycin resistance protein/dioxygenase domain;]	1	28.95	131	SINFRUG00000142593 (dre-miR-172)		dre-mir-172 dre-mir-194 fru-mir-194-1a		3' UUGUUGGUCGAUUCUGUGACGGU 5' dre-mir-172 __ ||||||..||.|||||||||||. __ 5' AACAACGCGC-AAGACACUGCCU 3' ENSDART00000020954_P E:-28.950001 S:131.000000 Loc:1638 Cons: 72.73%(fru)
dre-mir-101-1a	ENSDART00000011556_P	ENSDARG00000020784	SINFRUG00000148682		ENSDARG00000020784 4001 (4001 nt) [CASEIN KINASE I EC_2.7.1.- CKI; SERINE/THREONINE KINASE 1 EC_2.7.1.-;] [Protein kinase:Protein kinase; Protein kinase:Protein kinase;]	1	22.35	131	SINFRUG00000148682 (fru-miR-101-1a)		dre-mir-1-2a dre-mir-101-1a		3' GAAGUCAAUAGUGUCAUGACAU 5' dre-mir-101-1a __ :||.||..||:||||||||||| __ 5' UUUGAG--AUUACAGUACUGUA 3' ENSDART00000011556_P E:-22.35 S:131.000000 Loc:1259 Cons: 70.00%(fru)
fru-mir-93-1b	ENSDART00000004960_P	ENSDARG00000013689	SINFRUG00000149828		ENSDARG00000013689 4001 (4001 nt) [TOPOISOMERASE; TOPOISOMERASE;] [DNA polymerase, beta-like region:DNA polymerase, beta-like region; PAP/25A-associated domain:PAP/25A-associated domain; PAP/25A-associated domain:PAP/25A-associated domain;]	1	24.91	130	SINFRUG00000149828 (fru-miR-93-1b)		fru-mir-93-1b		3' GAUGGACGUGUUUGUCGUGAAAAC 5' fru-mir-93-1b __ ||:::|.|||||||||:|:|||.| __ 5' CUGUUUUCACAAACAGUAUUUUAG 3' ENSDART00000004960_P E:-24.91 S:130.000000 Loc:1131 Cons: 70.83%(fru)
dre-mir-93	ENSDART00000018107_P	ENSDARG00000019250	SINFRUG00000125256		ENSDARG00000019250 4001 (4001 nt) [FANCONI ANEMIA GROUP F FACF;] []	1	26.22	130	SINFRUG00000125256 (dre-miR-93)		dre-mir-106-b1 fru-mir-106-b2 dre-mir-93		3' GAUGGACGUGUUUGUCGUGAAA 5' dre-mir-93 __ |.:||||::.|||||||||||. __ 5' CAGCCUGUGGAAACAGCACUUG 3' ENSDART00000018107_P E:-26.219999 S:130.000000 Loc:1217 Cons: 72.73%(fru)
fru-mir-204-1a	ENSDART00000011205	ENSDARG00000010043	SINFRUG00000121760		ENSDARG00000010043 1567 (1567 nt) [COLLAGEN ALPHA CHAIN;] [Collagen triple helix repeat:Collagen triple helix repeat; Fibrillar collagen, C-terminal:Fibrillar collagen, C-terminal;]	1	24.83	130	SINFRUG00000121760 (fru-miR-204-1a)		fru-mir-204-1a		3' GUCCGUAUCCUAUUGUUUCCCUU 5' fru-mir-204-1a __ .||.||.||||.|||||||||:| __ 5' GAGACAAAGGA-AACAAAGGGGA 3' ENSDART00000011205 E:-24.83 S:130.000000 Loc:858 Cons: 72.73%(fru)
dre-mir-138-1	ENSDART00000015273	ENSDARG00000008620	SINFRUG00000130592		ENSDARG00000008620 746 (746 nt) [PRECURSOR;] [Fibronectin, type III:Fibronectin, type III; Fibrinogen, beta/gamma chain, C-terminal globular:Fibrinogen, beta/gamma chain, C-terminal globular;]	1	30.06	130	SINFRUG00000130592 (fru-miR-138-1)		dre-mir-138-2 dre-mir-138-1		3' CGGACUAAGUGUUGUGGUCGA 5' dre-mir-138-1 __ |||||...:|||||||||||| __ 5' GCCUG---UACAACACCAGCU 3' ENSDART00000015273 E:-30.059999 S:130.000000 Loc:717 Cons: 77.78%(fru)
fru-mir-18-3	ENSDART00000011226_P	ENSDARG00000001990	SINFRUG00000128490		VACUOLAR PROTEIN SORTING 18. [Source:SWISSPROT;Acc:P59015] ENSDARG00000001990 (-1) (53612 53614 62060 62060 5209) 4001 (4001 nt) [VACUOLAR SORTING 18;] []	1	20.69	130	SINFRUG00000128490 (fru-miR-18-3)		dre-mir-15-1a dre-mir-15-1b fru-mir-18-3 dre-mir-18-1 fru-mir-18-1b fru-mir-18-1a	GO:0015031->protein transport GO:0006886->intracellular protein transport GO:0008565->protein transporter activity GO:0005871->kinesin complex GO:0006810->transport GO:0016020->membrane	3' AUUGAUGUGAUCUACGUGGAAU 5' fru-mir-18-3 __ ||||||.|:|.|||||||:||| __ 5' UAACUA-AUU-GAUGCACUUUA 3' ENSDART00000011226_P E:-20.690001 S:130.000000 Loc:1045 Cons: 80.00%(fru)
dre-mir-16-3	ENSDART00000012394_P	ENSDARG00000016337	SINFRUG00000129636		ENSDARG00000016337 4001 (4001 nt) [LACTASE PHLORIZIN HYDROLASE PRECURSOR LACTASE GLYCOSYLCERAMIDASE [INCLUDES: LACTASE EC_3.2.1.108 ; PHLORIZIN HYDROLASE EC_3.2.1.- 62 ]; LACTASE PHLORIZIN HYDROLASE PRECURSOR LACTASE GLYCOSYLCERAMIDASE [INCLUDES: LACTASE EC_3.2.1.108 ; PHLORIZIN HYDROLASE EC_3.2.1.- 62 ]; LACTASE PHLORIZIN HYDROLASE PRECURSOR LACTASE GLYCOSYLCERAMIDASE [INCLUDES: LACTASE EC_3.2.1…	1	22.08	130	SINFRUG00000144529 (dre-miR-16-3)		dre-mir-103-3b dre-mir-107-2 fru-mir-142-1b-as dre-mir-16-3		3' GAGGUUAUAAAUGUACGACGAU 5' dre-mir-16-3 __ ||.|||.|||.:|||||||||| __ 5' CUGCAA-AUUAGCAUGCUGCUA 3' ENSDART00000012394_P E:-22.08 S:130.000000 Loc:2665 Cons: 76.19%(fru)
dre-mir-98-3b	ENSDART00000004351	ENSDARG00000008069	SINFRUG00000123021		ENSDARG00000008069 879 (879 nt) [UBIQUITIN CARBOXYL TERMINAL HYDROLASE 3 EC_3.1.2.15 UBIQUITIN THIOLESTERASE 3 UBIQUITIN SPECIFIC PROCESSING PROTEASE 3 DEUBIQUITINATING ENZYME 3; UBIQUITIN CARBOXYL TERMINAL HYDROLASE 3 EC_3.1.2.15 UBIQUITIN THIOLESTERASE 3 UBIQUITIN SPECIFIC PROCESSING PROTEASE 3 DEUBIQUITINATING ENZYME 3; UBIQUITIN CARBOXYL TERMINAL HYDROLASE 3 EC_3.1.2.15 UBIQUITIN THIOLESTERAS…	1	23.61	130	SINFRUG00000123021 (fru-miR-98-3b)		dre-mir-98-3b dre-mir-98-2a dre-mir-98-3a dre-mir-let7l-a dre-mir-let7l-a1 dre-mir-let7l-a2 dre-mir-let7l-b1 dre-mir-let7l-c1 fru-mir-let7l-c2 dre-mir-let7l-d1 fru-mir-let7l-d2		3' UUGGUGUGUUGGAUGAUGGAGU 5' dre-mir-98-3b __ |||:|::|||.:|::||||||| __ 5' AACUAUGCAAAUUGUUACCUCA 3' ENSDART00000004351 E:-23.610001 S:130.000000 Loc:801 Cons: 90.91%(fru)
dre-mir-98-3a	ENSDART00000004351	ENSDARG00000008069	SINFRUG00000123021		ENSDARG00000008069 879 (879 nt) [UBIQUITIN CARBOXYL TERMINAL HYDROLASE 3 EC_3.1.2.15 UBIQUITIN THIOLESTERASE 3 UBIQUITIN SPECIFIC PROCESSING PROTEASE 3 DEUBIQUITINATING ENZYME 3; UBIQUITIN CARBOXYL TERMINAL HYDROLASE 3 EC_3.1.2.15 UBIQUITIN THIOLESTERASE 3 UBIQUITIN SPECIFIC PROCESSING PROTEASE 3 DEUBIQUITINATING ENZYME 3; UBIQUITIN CARBOXYL TERMINAL HYDROLASE 3 EC_3.1.2.15 UBIQUITIN THIOLESTERAS…	1	23.61	130	SINFRUG00000123021 (fru-miR-98-3a)		dre-mir-98-3b dre-mir-98-2a dre-mir-98-3a dre-mir-let7l-a dre-mir-let7l-a1 dre-mir-let7l-a2 dre-mir-let7l-b1 dre-mir-let7l-c1 fru-mir-let7l-c2 dre-mir-let7l-d1 fru-mir-let7l-d2		3' UUGGUGUGUUGGAUGAUGGAGU 5' dre-mir-98-3a __ |||:|::|||.:|::||||||| __ 5' AACUAUGCAAAUUGUUACCUCA 3' ENSDART00000004351 E:-23.610001 S:130.000000 Loc:801 Cons: 90.91%(fru)
dre-mir-34-2b	ENSDART00000006823_P	ENSDARG00000013083	SINFRUG00000133890		ENSDARG00000013083 4001 (4001 nt) [AMBIGUOUS;] [AAA ATPase, central region:AAA ATPase, central region;]	1	21.38	129	SINFRUG00000133890 (dre-miR-34-2b)		fru-mir-17-1e dre-mir-17-1c dre-mir-34-2b dre-mir-34-3a		3' UGUUAGUCGAUUGUUGUGACGGA 5' dre-mir-34-2b __ .:|||:|.:|.||||||||||:| __ 5' CUAAUUA-UUCACAACACUGCUU 3' ENSDART00000006823_P E:-21.379999 S:129.000000 Loc:2183 Cons: 72.73%(fru)
dre-mir-34-3a	ENSDART00000006823_P	ENSDARG00000013083	SINFRUG00000133890		ENSDARG00000013083 4001 (4001 nt) [AMBIGUOUS;] [AAA ATPase, central region:AAA ATPase, central region;]	1	21.38	129	SINFRUG00000133890 (dre-miR-34-3a)		fru-mir-17-1e dre-mir-17-1c dre-mir-34-2b dre-mir-34-3a		3' UGUUAGUCGAUUGUUGUGACGGA 5' dre-mir-34-3a __ .:|||:|.:|.||||||||||:| __ 5' CUAAUUA-UUCACAACACUGCUU 3' ENSDART00000006823_P E:-21.379999 S:129.000000 Loc:2183 Cons: 72.73%(fru)
fru-mir-9g	ENSDART00000007284	ENSDARG00000014041	SINFRUG00000147781		ENSDARG00000014041 2444 (2444 nt) [CHROMODOMAIN HELICASE DNA BINDING; CHROMODOMAIN HELICASE DNA BINDING;] [SNF2 related domain:SNF2 related domain; Helicase, C-terminal:Helicase, C-terminal; Ubiquitin system component Cue:Ubiquitin system component Cue; SNF2 related domain:SNF2 related domain; Helicase, C-terminal:Helicase, C-terminal; Ubiquitin system component Cue:Ubiquitin system component Cue…	1	24.98	129	SINFRUG00000147781 (fru-miR-9g)		fru-mir-9g dre-mir-9c dre-mir-9f dre-mir-9d dre-mir-9b dre-mir-9e dre-mir-9a		3' AGUAUGUCGAUCUAUUGGUUUCU 5' fru-mir-9g __ |::.||||..||||:|||||||| __ 5' UUGCACAG-AAGAUGACCAAAGA 3' ENSDART00000007284 E:-24.98 S:129.000000 Loc:819 Cons: 72.73%(fru)
dre-mir-9c	ENSDART00000007284	ENSDARG00000014041	SINFRUG00000147781		ENSDARG00000014041 2444 (2444 nt) [CHROMODOMAIN HELICASE DNA BINDING; CHROMODOMAIN HELICASE DNA BINDING;] [SNF2 related domain:SNF2 related domain; Helicase, C-terminal:Helicase, C-terminal; Ubiquitin system component Cue:Ubiquitin system component Cue; SNF2 related domain:SNF2 related domain; Helicase, C-terminal:Helicase, C-terminal; Ubiquitin system component Cue:Ubiquitin system component Cue…	1	24.98	129	SINFRUG00000147781 (fru-miR-9c)		fru-mir-9g dre-mir-9c dre-mir-9f dre-mir-9d dre-mir-9b dre-mir-9e dre-mir-9a		3' AGUAUGUCGAUCUAUUGGUUUCU 5' dre-mir-9c __ |::.||||..||||:|||||||| __ 5' UUGCACAG-AAGAUGACCAAAGA 3' ENSDART00000007284 E:-24.98 S:129.000000 Loc:819 Cons: 72.73%(fru)
dre-mir-9f	ENSDART00000007284	ENSDARG00000014041	SINFRUG00000147781		ENSDARG00000014041 2444 (2444 nt) [CHROMODOMAIN HELICASE DNA BINDING; CHROMODOMAIN HELICASE DNA BINDING;] [SNF2 related domain:SNF2 related domain; Helicase, C-terminal:Helicase, C-terminal; Ubiquitin system component Cue:Ubiquitin system component Cue; SNF2 related domain:SNF2 related domain; Helicase, C-terminal:Helicase, C-terminal; Ubiquitin system component Cue:Ubiquitin system component Cue…	1	24.98	129	SINFRUG00000147781 (fru-miR-9f)		fru-mir-9g dre-mir-9c dre-mir-9f dre-mir-9d dre-mir-9b dre-mir-9e dre-mir-9a		3' AGUAUGUCGAUCUAUUGGUUUCU 5' dre-mir-9f __ |::.||||..||||:|||||||| __ 5' UUGCACAG-AAGAUGACCAAAGA 3' ENSDART00000007284 E:-24.98 S:129.000000 Loc:819 Cons: 72.73%(fru)
dre-mir-9d	ENSDART00000007284	ENSDARG00000014041	SINFRUG00000147781		ENSDARG00000014041 2444 (2444 nt) [CHROMODOMAIN HELICASE DNA BINDING; CHROMODOMAIN HELICASE DNA BINDING;] [SNF2 related domain:SNF2 related domain; Helicase, C-terminal:Helicase, C-terminal; Ubiquitin system component Cue:Ubiquitin system component Cue; SNF2 related domain:SNF2 related domain; Helicase, C-terminal:Helicase, C-terminal; Ubiquitin system component Cue:Ubiquitin system component Cue…	1	24.98	129	SINFRUG00000147781 (fru-miR-9d)		fru-mir-9g dre-mir-9c dre-mir-9f dre-mir-9d dre-mir-9b dre-mir-9e dre-mir-9a		3' AGUAUGUCGAUCUAUUGGUUUCU 5' dre-mir-9d __ |::.||||..||||:|||||||| __ 5' UUGCACAG-AAGAUGACCAAAGA 3' ENSDART00000007284 E:-24.98 S:129.000000 Loc:819 Cons: 72.73%(fru)
dre-mir-9b	ENSDART00000007284	ENSDARG00000014041	SINFRUG00000147781		ENSDARG00000014041 2444 (2444 nt) [CHROMODOMAIN HELICASE DNA BINDING; CHROMODOMAIN HELICASE DNA BINDING;] [SNF2 related domain:SNF2 related domain; Helicase, C-terminal:Helicase, C-terminal; Ubiquitin system component Cue:Ubiquitin system component Cue; SNF2 related domain:SNF2 related domain; Helicase, C-terminal:Helicase, C-terminal; Ubiquitin system component Cue:Ubiquitin system component Cue…	1	24.98	129	SINFRUG00000147781 (fru-miR-9b)		fru-mir-9g dre-mir-9c dre-mir-9f dre-mir-9d dre-mir-9b dre-mir-9e dre-mir-9a		3' AGUAUGUCGAUCUAUUGGUUUCU 5' dre-mir-9b __ |::.||||..||||:|||||||| __ 5' UUGCACAG-AAGAUGACCAAAGA 3' ENSDART00000007284 E:-24.98 S:129.000000 Loc:819 Cons: 72.73%(fru)
dre-mir-9e	ENSDART00000007284	ENSDARG00000014041	SINFRUG00000147781		ENSDARG00000014041 2444 (2444 nt) [CHROMODOMAIN HELICASE DNA BINDING; CHROMODOMAIN HELICASE DNA BINDING;] [SNF2 related domain:SNF2 related domain; Helicase, C-terminal:Helicase, C-terminal; Ubiquitin system component Cue:Ubiquitin system component Cue; SNF2 related domain:SNF2 related domain; Helicase, C-terminal:Helicase, C-terminal; Ubiquitin system component Cue:Ubiquitin system component Cue…	1	24.98	129	SINFRUG00000147781 (fru-miR-9e)		fru-mir-9g dre-mir-9c dre-mir-9f dre-mir-9d dre-mir-9b dre-mir-9e dre-mir-9a		3' AGUAUGUCGAUCUAUUGGUUUCU 5' dre-mir-9e __ |::.||||..||||:|||||||| __ 5' UUGCACAG-AAGAUGACCAAAGA 3' ENSDART00000007284 E:-24.98 S:129.000000 Loc:819 Cons: 72.73%(fru)
dre-mir-9a	ENSDART00000007284	ENSDARG00000014041	SINFRUG00000147781		ENSDARG00000014041 2444 (2444 nt) [CHROMODOMAIN HELICASE DNA BINDING; CHROMODOMAIN HELICASE DNA BINDING;] [SNF2 related domain:SNF2 related domain; Helicase, C-terminal:Helicase, C-terminal; Ubiquitin system component Cue:Ubiquitin system component Cue; SNF2 related domain:SNF2 related domain; Helicase, C-terminal:Helicase, C-terminal; Ubiquitin system component Cue:Ubiquitin system component Cue…	1	24.98	129	SINFRUG00000147781 (fru-miR-9a)		fru-mir-9g dre-mir-9c dre-mir-9f dre-mir-9d dre-mir-9b dre-mir-9e dre-mir-9a		3' AGUAUGUCGAUCUAUUGGUUUCU 5' dre-mir-9a __ |::.||||..||||:|||||||| __ 5' UUGCACAG-AAGAUGACCAAAGA 3' ENSDART00000007284 E:-24.98 S:129.000000 Loc:819 Cons: 72.73%(fru)
fru-mir-204-1a	ENSDART00000012352_P	ENSDARG00000003860	SINFRUG00000149621		ENSDARG00000003860 4001 (4001 nt) [CHROMOBOX HOMOLOG HETEROCHROMATIN 1 HOMOLOG HP1;] [Chromo domain:Chromo domain; Chromo shadow:Chromo shadow;]	1	27.69	129	SINFRUG00000149621 (fru-miR-204-1a)		dre-mir-15-1b dre-mir-196-1a dre-mir-196-1c dre-mir-196-1b fru-mir-204-1a		3' GUCCGUAUCCUAUUGUUUCCCUU 5' fru-mir-204-1a __ |||||..|.|.|||||||||||| __ 5' CAGGC--A-GUUAACAAAGGGAA 3' ENSDART00000012352_P E:-27.690001 S:129.000000 Loc:1223 Cons: 75.00%(fru)
dre-mir-181-1c	ENSDART00000027233_P	ENSDARG00000005258	SINFRUG00000146718		ENSDARG00000005258 4001 (4001 nt) [ZINC FINGER BASONUCLIN; ZINC FINGER BASONUCLIN; ZINC FINGER BASONUCLIN;] [Zn-finger, C2H2 type:Zn-finger, C2H2 type; Zn-finger, C2H2 type:Zn-finger, C2H2 type; Zn-finger, C2H2 type:Zn-finger, C2H2 type;]	1	23.08	129	SINFRUG00000146718 (fru-miR-181-1c)		dre-mir-181-1c dre-mir-181-1a dre-mir-181-1d dre-mir-181-1b		3' UGAGUGGCUGU-CGCAACUUACAA 5' dre-mir-181-1c __ |||:||.||||.|:|||.|||||| __ 5' ACUUACAGACAUGUGUUUAAUGUU 3' ENSDART00000027233_P E:-23.08 S:129.000000 Loc:1235 Cons: 70.83%(fru)
dre-mir-181-1a	ENSDART00000027233_P	ENSDARG00000005258	SINFRUG00000146718		ENSDARG00000005258 4001 (4001 nt) [ZINC FINGER BASONUCLIN; ZINC FINGER BASONUCLIN; ZINC FINGER BASONUCLIN;] [Zn-finger, C2H2 type:Zn-finger, C2H2 type; Zn-finger, C2H2 type:Zn-finger, C2H2 type; Zn-finger, C2H2 type:Zn-finger, C2H2 type;]	1	23.08	129	SINFRUG00000146718 (fru-miR-181-1a)		dre-mir-181-1c dre-mir-181-1a dre-mir-181-1d dre-mir-181-1b		3' UGAGUGGCUGU-CGCAACUUACAA 5' dre-mir-181-1a __ |||:||.||||.|:|||.|||||| __ 5' ACUUACAGACAUGUGUUUAAUGUU 3' ENSDART00000027233_P E:-23.08 S:129.000000 Loc:1235 Cons: 70.83%(fru)
dre-mir-181-1d	ENSDART00000027233_P	ENSDARG00000005258	SINFRUG00000146718		ENSDARG00000005258 4001 (4001 nt) [ZINC FINGER BASONUCLIN; ZINC FINGER BASONUCLIN; ZINC FINGER BASONUCLIN;] [Zn-finger, C2H2 type:Zn-finger, C2H2 type; Zn-finger, C2H2 type:Zn-finger, C2H2 type; Zn-finger, C2H2 type:Zn-finger, C2H2 type;]	1	23.08	129	SINFRUG00000146718 (fru-miR-181-1d)		dre-mir-181-1c dre-mir-181-1a dre-mir-181-1d dre-mir-181-1b		3' UGAGUGGCUGU-CGCAACUUACAA 5' dre-mir-181-1d __ |||:||.||||.|:|||.|||||| __ 5' ACUUACAGACAUGUGUUUAAUGUU 3' ENSDART00000027233_P E:-23.08 S:129.000000 Loc:1235 Cons: 70.83%(fru)
dre-mir-181-1b	ENSDART00000027233_P	ENSDARG00000005258	SINFRUG00000146718		ENSDARG00000005258 4001 (4001 nt) [ZINC FINGER BASONUCLIN; ZINC FINGER BASONUCLIN; ZINC FINGER BASONUCLIN;] [Zn-finger, C2H2 type:Zn-finger, C2H2 type; Zn-finger, C2H2 type:Zn-finger, C2H2 type; Zn-finger, C2H2 type:Zn-finger, C2H2 type;]	1	23.08	129	SINFRUG00000146718 (fru-miR-181-1b)		dre-mir-181-1c dre-mir-181-1a dre-mir-181-1d dre-mir-181-1b		3' UGAGUGGCUGU-CGCAACUUACAA 5' dre-mir-181-1b __ |||:||.||||.|:|||.|||||| __ 5' ACUUACAGACAUGUGUUUAAUGUU 3' ENSDART00000027233_P E:-23.08 S:129.000000 Loc:1235 Cons: 70.83%(fru)
dre-mir-16-2	ENSDART00000011400	ENSDARG00000011378	SINFRUG00000124591		ENSDARG00000011378 3831 (3831 nt) [U5 SMALL NUCLEAR RIBONUCLEOPROTEIN 200 KDA HELICASE EC_3.6.1.-; U5 SMALL NUCLEAR RIBONUCLEOPROTEIN 200 KDA HELICASE EC_3.6.1.-; U5 SMALL NUCLEAR RIBONUCLEOPROTEIN 200 KDA HELICASE EC_3.6.1.-; U5 SMALL NUCLEAR RIBONUCLEOPROTEIN 200 KDA HELICASE EC_3.6.1.-; U5 SMALL NUCLEAR RIBONUCLEOPROTEIN 200 KDA HELICASE EC_3.6.1.-; U5 SMALL NUCLEAR RIBONUCLEOPROTEIN 200 KDA H…	1	23.63	129	SINFRUG00000124591 (fru-miR-16-2)		dre-mir-145 dre-mir-16-3 dre-mir-16-2		3' GUGGUUAUAAAUGCACGACGAU 5' dre-mir-16-2 __ ::|.||.|||.||||||||||: __ 5' UGCAAAGAUUAACGUGCUGCUG 3' ENSDART00000011400 E:-23.629999 S:129.000000 Loc:890 Cons: 90.91%(fru)
dre-mir-9d	ENSDART00000014838_P	ENSDARG00000012923	SINFRUG00000126092		ENSDARG00000012923 4001 (4001 nt) [PRECURSOR; PRECURSOR; PRECURSOR;] [Cadherin:Cadherin; Cadherin:Cadherin; Cadherin:Cadherin;]	1	23.47	129	SINFRUG00000126092 (fru-miR-9d)		dre-mir-9d fru-mir-9g dre-mir-9e dre-mir-9c dre-mir-9f dre-mir-9a dre-mir-9b		3' AGUAUGUCGAUCUAUUGGUUUCU 5' dre-mir-9d __ |:|.||||||.|||||::||||| __ 5' UUA-ACAGCU-GAUAAUUAAAGA 3' ENSDART00000014838_P E:-23.469999 S:129.000000 Loc:2288 Cons: 85.71%(fru)
fru-mir-9g	ENSDART00000014838_P	ENSDARG00000012923	SINFRUG00000126092		ENSDARG00000012923 4001 (4001 nt) [PRECURSOR; PRECURSOR; PRECURSOR;] [Cadherin:Cadherin; Cadherin:Cadherin; Cadherin:Cadherin;]	1	23.47	129	SINFRUG00000126092 (fru-miR-9g)		dre-mir-9d fru-mir-9g dre-mir-9e dre-mir-9c dre-mir-9f dre-mir-9a dre-mir-9b		3' AGUAUGUCGAUCUAUUGGUUUCU 5' fru-mir-9g __ |:|.||||||.|||||::||||| __ 5' UUA-ACAGCU-GAUAAUUAAAGA 3' ENSDART00000014838_P E:-23.469999 S:129.000000 Loc:2288 Cons: 85.71%(fru)
dre-mir-9e	ENSDART00000014838_P	ENSDARG00000012923	SINFRUG00000126092		ENSDARG00000012923 4001 (4001 nt) [PRECURSOR; PRECURSOR; PRECURSOR;] [Cadherin:Cadherin; Cadherin:Cadherin; Cadherin:Cadherin;]	1	23.47	129	SINFRUG00000126092 (fru-miR-9e)		dre-mir-9d fru-mir-9g dre-mir-9e dre-mir-9c dre-mir-9f dre-mir-9a dre-mir-9b		3' AGUAUGUCGAUCUAUUGGUUUCU 5' dre-mir-9e __ |:|.||||||.|||||::||||| __ 5' UUA-ACAGCU-GAUAAUUAAAGA 3' ENSDART00000014838_P E:-23.469999 S:129.000000 Loc:2288 Cons: 85.71%(fru)
dre-mir-9c	ENSDART00000014838_P	ENSDARG00000012923	SINFRUG00000126092		ENSDARG00000012923 4001 (4001 nt) [PRECURSOR; PRECURSOR; PRECURSOR;] [Cadherin:Cadherin; Cadherin:Cadherin; Cadherin:Cadherin;]	1	23.47	129	SINFRUG00000126092 (fru-miR-9c)		dre-mir-9d fru-mir-9g dre-mir-9e dre-mir-9c dre-mir-9f dre-mir-9a dre-mir-9b		3' AGUAUGUCGAUCUAUUGGUUUCU 5' dre-mir-9c __ |:|.||||||.|||||::||||| __ 5' UUA-ACAGCU-GAUAAUUAAAGA 3' ENSDART00000014838_P E:-23.469999 S:129.000000 Loc:2288 Cons: 85.71%(fru)
dre-mir-9f	ENSDART00000014838_P	ENSDARG00000012923	SINFRUG00000126092		ENSDARG00000012923 4001 (4001 nt) [PRECURSOR; PRECURSOR; PRECURSOR;] [Cadherin:Cadherin; Cadherin:Cadherin; Cadherin:Cadherin;]	1	23.47	129	SINFRUG00000126092 (fru-miR-9f)		dre-mir-9d fru-mir-9g dre-mir-9e dre-mir-9c dre-mir-9f dre-mir-9a dre-mir-9b		3' AGUAUGUCGAUCUAUUGGUUUCU 5' dre-mir-9f __ |:|.||||||.|||||::||||| __ 5' UUA-ACAGCU-GAUAAUUAAAGA 3' ENSDART00000014838_P E:-23.469999 S:129.000000 Loc:2288 Cons: 85.71%(fru)
dre-mir-9a	ENSDART00000014838_P	ENSDARG00000012923	SINFRUG00000126092		ENSDARG00000012923 4001 (4001 nt) [PRECURSOR; PRECURSOR; PRECURSOR;] [Cadherin:Cadherin; Cadherin:Cadherin; Cadherin:Cadherin;]	1	23.47	129	SINFRUG00000126092 (fru-miR-9a)		dre-mir-9d fru-mir-9g dre-mir-9e dre-mir-9c dre-mir-9f dre-mir-9a dre-mir-9b		3' AGUAUGUCGAUCUAUUGGUUUCU 5' dre-mir-9a __ |:|.||||||.|||||::||||| __ 5' UUA-ACAGCU-GAUAAUUAAAGA 3' ENSDART00000014838_P E:-23.469999 S:129.000000 Loc:2288 Cons: 85.71%(fru)
dre-mir-9b	ENSDART00000014838_P	ENSDARG00000012923	SINFRUG00000126092		ENSDARG00000012923 4001 (4001 nt) [PRECURSOR; PRECURSOR; PRECURSOR;] [Cadherin:Cadherin; Cadherin:Cadherin; Cadherin:Cadherin;]	1	23.47	129	SINFRUG00000126092 (fru-miR-9b)		dre-mir-9d fru-mir-9g dre-mir-9e dre-mir-9c dre-mir-9f dre-mir-9a dre-mir-9b		3' AGUAUGUCGAUCUAUUGGUUUCU 5' dre-mir-9b __ |:|.||||||.|||||::||||| __ 5' UUA-ACAGCU-GAUAAUUAAAGA 3' ENSDART00000014838_P E:-23.469999 S:129.000000 Loc:2288 Cons: 85.71%(fru)
dre-mir-139	ENSDART00000027765_P	ENSDARG00000018510	SINFRUG00000133772		ENSDARG00000018510 4001 (4001 nt) [ALPHA N ACETYL NEURAMINIDE ALPHA 2 8 SIALYLTRANSFERASE EC_2.4.99.8 GANGLIOSIDE GD3 SYNTHASE GANGLIOSIDE GT3 SYNTHASE ALPHA 2 8 SIALYLTRANSFERASE 8A ST8SIA I;] [Glycosyl transferase, family 29:Glycosyl transferase, family 29;]	1	31.35	129	SINFRUG00000133772 (fru-miR-139)		dre-mir-139		3' UGACCUCUGUGUACGUGACAUCU 5' dre-mir-139 __ :|||.|..||||||||||||||. __ 5' GCUGUA--CACAUGCACUGUAGU 3' ENSDART00000027765_P E:-31.35 S:129.000000 Loc:1242 Cons: 71.43%(fru)
dre-mir-135-1a	ENSDART00000015082_P	ENSDARG00000021038	SINFRUG00000135959		ENSDARG00000021038 4001 (4001 nt) [ALPHA FETOPROTEIN ENHANCER BINDING AT MOTIF BINDING FACTOR AT BINDING TRANSCRIPTION FACTOR 1; ALPHA FETOPROTEIN ENHANCER BINDING AT MOTIF BINDING FACTOR AT BINDING TRANSCRIPTION FACTOR 1; ALPHA FETOPROTEIN ENHANCER BINDING AT MOTIF BINDING FACTOR AT BINDING TRANSCRIPTION FACTOR 1;] [Homeobox:Homeobox; Zn-finger, C2H2 type:Zn-finger, C2H2 type; Homeobox:Homeobox;…	1	22.22	129	SINFRUG00000135959 (fru-miR-135-1a)		dre-mir-125-b-1 dre-mir-125-b-3 dre-mir-135-2b dre-mir-135-1a dre-mir-135-2a dre-mir-139 dre-mir-16-3 dre-mir-199-1c dre-mir-199-1a dre-mir-199-1b dre-mir-27-2a dre-mir-27-3a dre-mir-27-1a dre-mir-29-2a dre-mir-29-2b fru-mir-93-1b		3' AGUGUAUCCUUAUUUUUCGGUAU 5' dre-mir-135-1a __ |||||.||||:.|||||.||||: __ 5' UCACACAGGAGGAAAAAACCAUG 3' ENSDART00000015082_P E:-22.219999 S:129.000000 Loc:616 Cons: 73.91%(fru)
dre-mir-143-1a	ENSDART00000027014_P	ENSDARG00000020497	SINFRUG00000131033		ENSDARG00000020497 4001 (4001 nt) [RAS RELATED RAB;] [Ras GTPase superfamily:Ras GTPase superfamily;]	1	28.21	129	SINFRUG00000131033 (fru-miR-143-1a)		dre-mir-143-1a		3' GCUCGAUGUCACGAAGUAGAGU 5' dre-mir-143-1a __ :.||||||.|.||||||||||| __ 5' UCAGCUAC-G-GCUUCAUCUCA 3' ENSDART00000027014_P E:-28.209999 S:129.000000 Loc:1525 Cons: 70.00%(fru)
dre-mir-103-3b	ENSDART00000027322_P	ENSDARG00000007384	SINFRUG00000139937		ENSDARG00000007384 2439 (2439 nt) [AMBIGUOUS;] []	1	23.34	128	SINFRUG00000139936 (dre-miR-103-3b)		dre-mir-103-3b dre-mir-107-2 dre-mir-130-1a dre-mir-130-1c		3' ACUUUCGGGACAUGUUACGACGA 5' dre-mir-103-3b __ ..||||::|..|||||||:|||| __ 5' AAAAAGUUC--UACAAUGUUGCU 3' ENSDART00000027322_P E:-23.34 S:128.000000 Loc:724 Cons: 71.43%(fru)
dre-mir-107-2	ENSDART00000027322_P	ENSDARG00000007384	SINFRUG00000139937		ENSDARG00000007384 2439 (2439 nt) [AMBIGUOUS;] []	1	23.34	128	SINFRUG00000139936 (dre-miR-107-2)		dre-mir-103-3b dre-mir-107-2 dre-mir-130-1a dre-mir-130-1c		3' ACUUUCGGGACAUGUUACGACGA 5' dre-mir-107-2 __ ..||||::|..|||||||:|||| __ 5' AAAAAGUUC--UACAAUGUUGCU 3' ENSDART00000027322_P E:-23.34 S:128.000000 Loc:724 Cons: 71.43%(fru)
fru-mir-204-1a	ENSDART00000015522_P	ENSDARG00000017570	SINFRUG00000122021		ENSDARG00000017570 4001 (4001 nt) [AMBIGUOUS;] []	1	30.99	128	SINFRUG00000122021 (fru-miR-204-1a)		fru-mir-10a dre-mir-10-1b dre-mir-10-1a dre-mir-200a-1a fru-mir-204-1a		3' GUCCGUAUCCUAUUGUUUCCCUU 5' fru-mir-204-1a __ ||||...:||||:|||:|||||| __ 5' CAGG---GGGAUGACAGAGGGAA 3' ENSDART00000015522_P E:-30.99 S:128.000000 Loc:430 Cons: 70.00%(fru)
dre-mir-196-1d	ENSDART00000002884_P	ENSDARG00000016658	SINFRUG00000146328		ENSDARG00000016658 4001 (4001 nt) [HOMEOBOX; HOMEOBOX;] [Homeobox:Homeobox; Homeobox protein, antennapedia type:Homeobox protein, antennapedia type; Homeobox:Homeobox; Homeobox protein, antennapedia type:Homeobox protein, antennapedia type; Helix-turn-helix motif, lambda-like repressor:Helix-turn-helix motif, lambda-like repressor;]	1	28.71	128	SINFRUG00000146328 (dre-miR-196-1d)		dre-mir-16-2 fru-mir-17-1e-as dre-mir-196-1c dre-mir-196-1a dre-mir-196-1e dre-mir-196-1d dre-mir-196-1b		3' GGUUGUUGAACUUUGAUGGAU 5' dre-mir-196-1d __ ||||||||||.|||||:|||| __ 5' CCAACAACUU-AAACUGCCUA 3' ENSDART00000002884_P E:-28.709999 S:128.000000 Loc:937 Cons: 95.00%(fru)
dre-mir-196-1a	ENSDART00000027847_P	ENSDARG00000013255	SINFRUG00000149700		RIBOSOMAL PROTEIN S5. [Source:RefSeq;Acc:NM_173232] ENSDARG00000013255 (1) (3145 3145 7943 7943 20715) 4001 (4001 nt) [40S RIBOSOMAL S5;] [Ribosomal protein S7:Ribosomal protein S7;]	1	23.48	128	SINFRUG00000149700 (fru-miR-196-1a)		dre-mir-143-1a dre-mir-196-1b dre-mir-196-1c dre-mir-196-1a	GO:0005622->intracellular GO:0006412->protein biosynthesis GO:0005840->ribosome GO:0003735->structural constituent of ribosome GO:0003735->structural constituent of ribosome GO:0015935->small ribosomal subunit	3' GGUUGUUGUAGUUUGAUGGAU 5' dre-mir-196-1a __ :||||||.||:|||||||||. __ 5' UCAACAA-AUUAAACUACCUU 3' ENSDART00000027847_P E:-23.48 S:128.000000 Loc:899 Cons: 70.00%(fru)
dre-mir-19-1d	ENSDART00000008901_P	ENSDARG00000011291	SINFRUG00000121789		ENSDARG00000011291 3638 (3638 nt) [AMBIGUOUS;] []	1	23.24	128	SINFRUG00000121789 (dre-miR-19-1d)		dre-mir-1-2c dre-mir-1-2b dre-mir-19-1c dre-mir-19-1d dre-mir-19-2a dre-mir-19-1b dre-mir-19-2b dre-mir-19-1a		3' AGUCAAAACGUACCU-AAACGUGU 5' dre-mir-19-1d __ ||||||.||::||||.||||||:: __ 5' UCAGUUCUGUGUGGAGUUUGCAUG 3' ENSDART00000008901_P E:-23.24 S:128.000000 Loc:2607 Cons: 75.00%(fru)
dre-mir-19-1b	ENSDART00000008901_P	ENSDARG00000011291	SINFRUG00000121789		ENSDARG00000011291 3638 (3638 nt) [AMBIGUOUS;] []	1	23.24	128	SINFRUG00000121789 (dre-miR-19-1b)		dre-mir-1-2c dre-mir-1-2b dre-mir-19-1c dre-mir-19-1d dre-mir-19-2a dre-mir-19-1b dre-mir-19-2b dre-mir-19-1a		3' AGUCAAAACGUACCU-AAACGUGU 5' dre-mir-19-1b __ ||||||.||::||||.||||||:: __ 5' UCAGUUCUGUGUGGAGUUUGCAUG 3' ENSDART00000008901_P E:-23.24 S:128.000000 Loc:2607 Cons: 75.00%(fru)
dre-mir-190-2a	ENSDART00000023731_P	ENSDARG00000017873	SINFRUG00000140998		ENSDARG00000017873 4001 (4001 nt) [AMBIGUOUS; AMBIGUOUS; AMBIGUOUS; AMBIGUOUS;] [Vps53-like, N-terminal:Vps53-like, N-terminal; Vps53-like, N-terminal:Vps53-like, N-terminal; Vps53-like, N-terminal:Vps53-like, N-terminal;]	1	23.79	128	SINFRUG00000140998 (fru-miR-190-2a)		dre-mir-190-2a		3' CGUUGGCUUAUAGUUUGUAUAGU 5' dre-mir-190-2a __ |||:|||||.:|:|||:||||.| __ 5' GCAGCCGAACGUUAAAUAUAUAA 3' ENSDART00000023731_P E:-23.790001 S:128.000000 Loc:2139 Cons: 73.91%(fru)
dre-mir-129-1	ENSDART00000006622_P	ENSDARG00000018907	SINFRUG00000138353		ENSDARG00000018907 1734 (1734 nt) [AMBIGUOUS; AMBIGUOUS;] [Zn-finger, C2H2 type:Zn-finger, C2H2 type; MOZ/SAS-like protein:MOZ/SAS-like protein; Zn-finger, C2H2 type:Zn-finger, C2H2 type; MOZ/SAS-like protein:MOZ/SAS-like protein;]	1	27.92	128	SINFRUG00000138353 (fru-miR-129-1)		dre-mir-129-1		3' UCGUUCGGGUC-UGGCGUUUUUC 5' dre-mir-129-1 __ ||||:.|::||.|:||||||:|| __ 5' AGCAGACUUAGCAUCGCAAAGAG 3' ENSDART00000006622_P E:-27.92 S:128.000000 Loc:853 Cons: 73.91%(fru)
dre-mir-17-1d	ENSDART00000025123_P	ENSDARG00000003243	SINFRUG00000138230		ENSDARG00000003243 4001 (4001 nt) [AMBIGUOUS;] []	1	24.09	128	SINFRUG00000138230 (fru-miR-17-1d)		dre-mir-106-a1 dre-mir-106-b1 dre-mir-17-1a fru-mir-17-1e dre-mir-17-1c dre-mir-17-1d dre-mir-17-1b dre-mir-20-1b dre-mir-20-1 dre-mir-20-2b dre-mir-20-2a fru-mir-93-2b dre-mir-let7l-a1 dre-mir-let7l-a2		3' UGAUGGACG-UGACACUCGUGAAAC 5' dre-mir-17-1d __ |..||:|||.|:|.||||||||||. __ 5' AGAACUUGCUAUUCUGAGCACUUUC 3' ENSDART00000025123_P E:-24.09 S:128.000000 Loc:553 Cons: 80.00%(fru)
dre-mir-20-2b	ENSDART00000025123_P	ENSDARG00000003243	SINFRUG00000138230		ENSDARG00000003243 4001 (4001 nt) [AMBIGUOUS;] []	1	24.09	128	SINFRUG00000138230 (dre-miR-20-2b)		dre-mir-106-a1 dre-mir-106-b1 dre-mir-17-1a fru-mir-17-1e dre-mir-17-1c dre-mir-17-1d dre-mir-17-1b dre-mir-20-1b dre-mir-20-1 dre-mir-20-2b dre-mir-20-2a fru-mir-93-2b dre-mir-let7l-a1 dre-mir-let7l-a2		3' GAUGGACG-UGACACUCGUGAAAC 5' dre-mir-20-2b __ ..||:|||.|:|.||||||||||. __ 5' GAACUUGCUAUUCUGAGCACUUUC 3' ENSDART00000025123_P E:-24.09 S:128.000000 Loc:553 Cons: 79.17%(fru)
dre-mir-20-2a	ENSDART00000025123_P	ENSDARG00000003243	SINFRUG00000138230		ENSDARG00000003243 4001 (4001 nt) [AMBIGUOUS;] []	1	24.09	128	SINFRUG00000138230 (dre-miR-20-2a)		dre-mir-106-a1 dre-mir-106-b1 dre-mir-17-1a fru-mir-17-1e dre-mir-17-1c dre-mir-17-1d dre-mir-17-1b dre-mir-20-1b dre-mir-20-1 dre-mir-20-2b dre-mir-20-2a fru-mir-93-2b dre-mir-let7l-a1 dre-mir-let7l-a2		3' GAUGGACG-UGACACUCGUGAAAC 5' dre-mir-20-2a __ ..||:|||.|:|.||||||||||. __ 5' GAACUUGCUAUUCUGAGCACUUUC 3' ENSDART00000025123_P E:-24.09 S:128.000000 Loc:553 Cons: 79.17%(fru)
dre-mir-144	ENSDART00000015342_P	ENSDARG00000006626	SINFRUG00000137460		ENSDARG00000006626 4001 (4001 nt) [AMBIGUOUS;] [Flagellar calcium-binding protein (calflagin):Flagellar calcium-binding protein (calflagin); Calcium-binding EF-hand:Calcium-binding EF-hand;]	1	24.05	128	SINFRUG00000137460 (fru-miR-144)		dre-mir-144 dre-mir-31		3' UAUCAUGUAGUAGAUAUGACAU 5' dre-mir-144 __ |.||||||.||.|||||||||| __ 5' AAAGUACA-CACCUAUACUGUA 3' ENSDART00000015342_P E:-24.049999 S:128.000000 Loc:203 Cons: 71.43%(fru)
dre-mir-let7l-a1	ENSDART00000018208_P	ENSDARG00000000343	SINFRUG00000121286		ENSDARG00000000343 4001 (4001 nt) [OLIGOPHRENIN 1; OLIGOPHRENIN 1; OLIGOPHRENIN 1; OLIGOPHRENIN 1; OLIGOPHRENIN 1;] [Pleckstrin-like:Pleckstrin-like; RhoGAP domain:RhoGAP domain; RhoGAP domain:RhoGAP domain; RhoGAP domain:RhoGAP domain;]	1	27.21	128	SINFRUG00000121286 (dre-miR-let7l-a1)		dre-mir-let7l-a1 dre-mir-let7l-a2		3' UUGGUAUGUUGGAUGAUGGAGU 5' dre-mir-let7l-a1 __ .|||.||.||||||||||||:| __ 5' UACC-UA-AACCUACUACCUUA 3' ENSDART00000018208_P E:-27.209999 S:128.000000 Loc:2166 Cons: 70.00%(fru)
dre-mir-let7l-a2	ENSDART00000018208_P	ENSDARG00000000343	SINFRUG00000121286		ENSDARG00000000343 4001 (4001 nt) [OLIGOPHRENIN 1; OLIGOPHRENIN 1; OLIGOPHRENIN 1; OLIGOPHRENIN 1; OLIGOPHRENIN 1;] [Pleckstrin-like:Pleckstrin-like; RhoGAP domain:RhoGAP domain; RhoGAP domain:RhoGAP domain; RhoGAP domain:RhoGAP domain;]	1	27.21	128	SINFRUG00000121286 (dre-miR-let7l-a2)		dre-mir-let7l-a1 dre-mir-let7l-a2		3' UUGGUAUGUUGGAUGAUGGAGU 5' dre-mir-let7l-a2 __ .|||.||.||||||||||||:| __ 5' UACC-UA-AACCUACUACCUUA 3' ENSDART00000018208_P E:-27.209999 S:128.000000 Loc:2166 Cons: 70.00%(fru)
fru-mir-30c	ENSDART00000011181_P	ENSDARG00000010692	SINFRUG00000146487		ENSDARG00000010692 4001 (4001 nt) [NEUROPEPTIDE Y RECEPTOR TYPE R;] [Rhodopsin-like GPCR superfamily:Rhodopsin-like GPCR superfamily; Neuropeptide Y receptor:Neuropeptide Y receptor;]	1	22.4	128	SINFRUG00000146487 (fru-miR-30c)		fru-mir-30c		3' CGACUCUCACAU-CCUACAAAUGU 5' fru-mir-30c __ ..||.|.||.||.||||||||||| __ 5' UGUGUGUGUUUAGGGAUGUUUACA 3' ENSDART00000011181_P E:-22.4 S:128.000000 Loc:136 Cons: 70.83%(fru)
dre-mir-184	ENSDART00000017919_P	ENSDARG00000008080	SINFRUG00000154846		ENSDARG00000008080 4001 (4001 nt) [AMINOPEPTIDASE N EC_3.4.11.2 MICROSOMAL AMINOPEPTIDASE; AMINOPEPTIDASE N EC_3.4.11.2 MICROSOMAL AMINOPEPTIDASE;] [Membrane alanine aminopeptidase:Membrane alanine aminopeptidase; Membrane alanine aminopeptidase:Membrane alanine aminopeptidase;]	1	23.88	128	SINFRUG00000154846 (dre-miR-184)		dre-mir-184 dre-mir-200c-3a		3' CGGGAAUAGUCAAGAGGCAGGU 5' dre-mir-184 __ |||.||||:..|||||:||||| __ 5' GCCAUUAUU--UUCUCUGUCCA 3' ENSDART00000017919_P E:-23.879999 S:128.000000 Loc:2434 Cons: 70.00%(fru)
dre-mir-181-1b	ENSDART00000025892_P	ENSDARG00000005026	SINFRUG00000145223		ENSDARG00000005026 4001 (4001 nt) [UNKNOWN; UNKNOWN;] [Zn-finger, C2H2 type:Zn-finger, C2H2 type; Zn-finger, C2H2 type:Zn-finger, C2H2 type;]	1	24.63	127	SINFRUG00000145223 (fru-miR-181-1b)		dre-mir-139 dre-mir-181-1b dre-mir-181-1c dre-mir-181-1a dre-mir-181-1d		3' UGAGUG-GCUGUCGCAACUUACAA 5' dre-mir-181-1b __ |..|||.|.::||:|||||||||| __ 5' AAGCACUCUGUAGUGUUGAAUGUU 3' ENSDART00000025892_P E:-24.629999 S:127.000000 Loc:455 Cons: 70.83%(fru)
dre-mir-181-1c	ENSDART00000025892_P	ENSDARG00000005026	SINFRUG00000145223		ENSDARG00000005026 4001 (4001 nt) [UNKNOWN; UNKNOWN;] [Zn-finger, C2H2 type:Zn-finger, C2H2 type; Zn-finger, C2H2 type:Zn-finger, C2H2 type;]	1	24.63	127	SINFRUG00000145223 (fru-miR-181-1c)		dre-mir-139 dre-mir-181-1b dre-mir-181-1c dre-mir-181-1a dre-mir-181-1d		3' UGAGUG-GCUGUCGCAACUUACAA 5' dre-mir-181-1c __ |..|||.|.::||:|||||||||| __ 5' AAGCACUCUGUAGUGUUGAAUGUU 3' ENSDART00000025892_P E:-24.629999 S:127.000000 Loc:455 Cons: 70.83%(fru)
dre-mir-181-1a	ENSDART00000025892_P	ENSDARG00000005026	SINFRUG00000145223		ENSDARG00000005026 4001 (4001 nt) [UNKNOWN; UNKNOWN;] [Zn-finger, C2H2 type:Zn-finger, C2H2 type; Zn-finger, C2H2 type:Zn-finger, C2H2 type;]	1	24.63	127	SINFRUG00000145223 (fru-miR-181-1a)		dre-mir-139 dre-mir-181-1b dre-mir-181-1c dre-mir-181-1a dre-mir-181-1d		3' UGAGUG-GCUGUCGCAACUUACAA 5' dre-mir-181-1a __ |..|||.|.::||:|||||||||| __ 5' AAGCACUCUGUAGUGUUGAAUGUU 3' ENSDART00000025892_P E:-24.629999 S:127.000000 Loc:455 Cons: 70.83%(fru)
dre-mir-181-1d	ENSDART00000025892_P	ENSDARG00000005026	SINFRUG00000145223		ENSDARG00000005026 4001 (4001 nt) [UNKNOWN; UNKNOWN;] [Zn-finger, C2H2 type:Zn-finger, C2H2 type; Zn-finger, C2H2 type:Zn-finger, C2H2 type;]	1	24.63	127	SINFRUG00000145223 (fru-miR-181-1d)		dre-mir-139 dre-mir-181-1b dre-mir-181-1c dre-mir-181-1a dre-mir-181-1d		3' UGAGUG-GCUGUCGCAACUUACAA 5' dre-mir-181-1d __ |..|||.|.::||:|||||||||| __ 5' AAGCACUCUGUAGUGUUGAAUGUU 3' ENSDART00000025892_P E:-24.629999 S:127.000000 Loc:455 Cons: 70.83%(fru)
fru-mir-19-3a	ENSDART00000008698_P	ENSDARG00000011312	SINFRUG00000132451		ENSDARG00000011312 4001 (4001 nt) [MITOGEN ACTIVATED KINASE KINASE KINASE KINASE EC_2.7.1.37 MAPK/ERK KINASE KINASE KINASE MEK KINASE KINASE MEKKK KINASE;] [Protein kinase:Protein kinase;]	1	18.89	127	SINFRUG00000132451 (fru-miR-19-3a)		fru-mir-19-3a		3' CGCUCAAAUC-GGAACUAAAUUGU 5' fru-mir-19-3a __ .:|.||||||.|:||.|||||||| __ 5' AUGUGUUUAGACUUUUAUUUAACA 3' ENSDART00000008698_P E:-18.889999 S:127.000000 Loc:1321 Cons: 70.83%(fru)
dre-mir-190	ENSDART00000013262_P	ENSDARG00000003194	SINFRUG00000144785		ENSDARG00000003194 4001 (4001 nt) [TRIPARTITE MOTIF;] [Butyrophylin-like:Butyrophylin-like; SPla/RYanodine receptor SPRY:SPla/RYanodine receptor SPRY;]	1	18.77	127	SINFRUG00000144785 (dre-miR-190)		dre-mir-190 fru-mir-190-1a		3' UGGAUUAUAUAGUUUGUAUAGU 5' dre-mir-190 __ |:|.|:|:|||.|||||||||| __ 5' AUC-AGUGUAUAAAACAUAUCA 3' ENSDART00000013262_P E:-18.77 S:127.000000 Loc:2479 Cons: 80.95%(fru)
fru-mir-190-1a	ENSDART00000013262_P	ENSDARG00000003194	SINFRUG00000144785		ENSDARG00000003194 4001 (4001 nt) [TRIPARTITE MOTIF;] [Butyrophylin-like:Butyrophylin-like; SPla/RYanodine receptor SPRY:SPla/RYanodine receptor SPRY;]	1	18.77	127	SINFRUG00000144785 (fru-miR-190-1a)		dre-mir-190 fru-mir-190-1a		3' UGGAUUAUAUAGUUUGUAUAGU 5' fru-mir-190-1a __ |:|.|:|:|||.|||||||||| __ 5' AUC-AGUGUAUAAAACAUAUCA 3' ENSDART00000013262_P E:-18.77 S:127.000000 Loc:2479 Cons: 80.95%(fru)
dre-mir-27-3a	ENSDART00000025350_P	ENSDARG00000012098	SINFRUG00000127307		ENSDARG00000012098 4001 (4001 nt) [ATROPHIN 1 DENTATORUBRAL PALLIDOLUYSIAN ATROPHY; ATROPHIN 1 DENTATORUBRAL PALLIDOLUYSIAN ATROPHY;] [Proline-rich extensin:Proline-rich extensin; Atrophin:Atrophin; Myb DNA-binding domain:Myb DNA-binding domain; Zn-finger, GATA type:Zn-finger, GATA type; Bromo adjacent region:Bromo adjacent region; ELM2 domain:ELM2 domain; Proline-rich extensin:Proline-rich exten…	1	25.16	127	SINFRUG00000127307 (fru-miR-27-3a)		dre-mir-27-3a		3' UGACUU-GAAUCGGUGACACUU 5' dre-mir-27-3a __ |:||||.|.|.|:||||||||| __ 5' AUUGAACCAUUGUCACUGUGAA 3' ENSDART00000025350_P E:-25.16 S:127.000000 Loc:1443 Cons: 72.73%(fru)
dre-mir-9c	ENSDART00000018480_P	ENSDARG00000020001	SINFRUG00000125648		ENSDARG00000020001 3667 (3667 nt) [UV EXCISION REPAIR RAD23 HOMOLOG B XP C REPAIR COMPLEMENTING COMPLEX 58 KDA P58;] [Ubiquitin domain:Ubiquitin domain; Ubiquitin-associated domain:Ubiquitin-associated domain;]	1	24.61	127	SINFRUG00000125648 (fru-miR-9c)		dre-mir-138-1 dre-mir-138-2 dre-mir-9c dre-mir-9f dre-mir-9d dre-mir-9a fru-mir-9g dre-mir-9b dre-mir-9e		3' AGUAU-GUCGAUCUAUUGGUUUCU 5' dre-mir-9c __ |||.|.|||||..|||||||:||| __ 5' UCAGAUCAGCU-CAUAACCAGAGA 3' ENSDART00000018480_P E:-24.610001 S:127.000000 Loc:1801 Cons: 73.91%(fru)
dre-mir-9f	ENSDART00000018480_P	ENSDARG00000020001	SINFRUG00000125648		ENSDARG00000020001 3667 (3667 nt) [UV EXCISION REPAIR RAD23 HOMOLOG B XP C REPAIR COMPLEMENTING COMPLEX 58 KDA P58;] [Ubiquitin domain:Ubiquitin domain; Ubiquitin-associated domain:Ubiquitin-associated domain;]	1	24.61	127	SINFRUG00000125648 (fru-miR-9f)		dre-mir-138-1 dre-mir-138-2 dre-mir-9c dre-mir-9f dre-mir-9d dre-mir-9a fru-mir-9g dre-mir-9b dre-mir-9e		3' AGUAU-GUCGAUCUAUUGGUUUCU 5' dre-mir-9f __ |||.|.|||||..|||||||:||| __ 5' UCAGAUCAGCU-CAUAACCAGAGA 3' ENSDART00000018480_P E:-24.610001 S:127.000000 Loc:1801 Cons: 73.91%(fru)
dre-mir-9d	ENSDART00000018480_P	ENSDARG00000020001	SINFRUG00000125648		ENSDARG00000020001 3667 (3667 nt) [UV EXCISION REPAIR RAD23 HOMOLOG B XP C REPAIR COMPLEMENTING COMPLEX 58 KDA P58;] [Ubiquitin domain:Ubiquitin domain; Ubiquitin-associated domain:Ubiquitin-associated domain;]	1	24.61	127	SINFRUG00000125648 (fru-miR-9d)		dre-mir-138-1 dre-mir-138-2 dre-mir-9c dre-mir-9f dre-mir-9d dre-mir-9a fru-mir-9g dre-mir-9b dre-mir-9e		3' AGUAU-GUCGAUCUAUUGGUUUCU 5' dre-mir-9d __ |||.|.|||||..|||||||:||| __ 5' UCAGAUCAGCU-CAUAACCAGAGA 3' ENSDART00000018480_P E:-24.610001 S:127.000000 Loc:1801 Cons: 73.91%(fru)
dre-mir-9a	ENSDART00000018480_P	ENSDARG00000020001	SINFRUG00000125648		ENSDARG00000020001 3667 (3667 nt) [UV EXCISION REPAIR RAD23 HOMOLOG B XP C REPAIR COMPLEMENTING COMPLEX 58 KDA P58;] [Ubiquitin domain:Ubiquitin domain; Ubiquitin-associated domain:Ubiquitin-associated domain;]	1	24.61	127	SINFRUG00000125648 (fru-miR-9a)		dre-mir-138-1 dre-mir-138-2 dre-mir-9c dre-mir-9f dre-mir-9d dre-mir-9a fru-mir-9g dre-mir-9b dre-mir-9e		3' AGUAU-GUCGAUCUAUUGGUUUCU 5' dre-mir-9a __ |||.|.|||||..|||||||:||| __ 5' UCAGAUCAGCU-CAUAACCAGAGA 3' ENSDART00000018480_P E:-24.610001 S:127.000000 Loc:1801 Cons: 73.91%(fru)
fru-mir-9g	ENSDART00000018480_P	ENSDARG00000020001	SINFRUG00000125648		ENSDARG00000020001 3667 (3667 nt) [UV EXCISION REPAIR RAD23 HOMOLOG B XP C REPAIR COMPLEMENTING COMPLEX 58 KDA P58;] [Ubiquitin domain:Ubiquitin domain; Ubiquitin-associated domain:Ubiquitin-associated domain;]	1	24.61	127	SINFRUG00000125648 (fru-miR-9g)		dre-mir-138-1 dre-mir-138-2 dre-mir-9c dre-mir-9f dre-mir-9d dre-mir-9a fru-mir-9g dre-mir-9b dre-mir-9e		3' AGUAU-GUCGAUCUAUUGGUUUCU 5' fru-mir-9g __ |||.|.|||||..|||||||:||| __ 5' UCAGAUCAGCU-CAUAACCAGAGA 3' ENSDART00000018480_P E:-24.610001 S:127.000000 Loc:1801 Cons: 73.91%(fru)
dre-mir-9b	ENSDART00000018480_P	ENSDARG00000020001	SINFRUG00000125648		ENSDARG00000020001 3667 (3667 nt) [UV EXCISION REPAIR RAD23 HOMOLOG B XP C REPAIR COMPLEMENTING COMPLEX 58 KDA P58;] [Ubiquitin domain:Ubiquitin domain; Ubiquitin-associated domain:Ubiquitin-associated domain;]	1	24.61	127	SINFRUG00000125648 (fru-miR-9b)		dre-mir-138-1 dre-mir-138-2 dre-mir-9c dre-mir-9f dre-mir-9d dre-mir-9a fru-mir-9g dre-mir-9b dre-mir-9e		3' AGUAU-GUCGAUCUAUUGGUUUCU 5' dre-mir-9b __ |||.|.|||||..|||||||:||| __ 5' UCAGAUCAGCU-CAUAACCAGAGA 3' ENSDART00000018480_P E:-24.610001 S:127.000000 Loc:1801 Cons: 73.91%(fru)
dre-mir-9e	ENSDART00000018480_P	ENSDARG00000020001	SINFRUG00000125648		ENSDARG00000020001 3667 (3667 nt) [UV EXCISION REPAIR RAD23 HOMOLOG B XP C REPAIR COMPLEMENTING COMPLEX 58 KDA P58;] [Ubiquitin domain:Ubiquitin domain; Ubiquitin-associated domain:Ubiquitin-associated domain;]	1	24.61	127	SINFRUG00000125648 (fru-miR-9e)		dre-mir-138-1 dre-mir-138-2 dre-mir-9c dre-mir-9f dre-mir-9d dre-mir-9a fru-mir-9g dre-mir-9b dre-mir-9e		3' AGUAU-GUCGAUCUAUUGGUUUCU 5' dre-mir-9e __ |||.|.|||||..|||||||:||| __ 5' UCAGAUCAGCU-CAUAACCAGAGA 3' ENSDART00000018480_P E:-24.610001 S:127.000000 Loc:1801 Cons: 73.91%(fru)
dre-mir-20-2b	ENSDART00000027285_P	ENSDARG00000017510	SINFRUG00000120519		ENSDARG00000017510 4001 (4001 nt) [TRANSCRIPTION FACTOR;] []	1	23.9	127	SINFRUG00000120519 (dre-miR-20-2b)		fru-mir-17-1e dre-mir-20-2b dre-mir-20-2a		3' GAUGGACGUGACACUCGUGAAAC 5' dre-mir-20-2b __ .||||..||||.||||||||||. __ 5' GUACC--CACUAUGAGCACUUUU 3' ENSDART00000027285_P E:-23.9 S:127.000000 Loc:591 Cons: 80.95%(fru)
dre-mir-20-2a	ENSDART00000027285_P	ENSDARG00000017510	SINFRUG00000120519		ENSDARG00000017510 4001 (4001 nt) [TRANSCRIPTION FACTOR;] []	1	23.9	127	SINFRUG00000120519 (dre-miR-20-2a)		fru-mir-17-1e dre-mir-20-2b dre-mir-20-2a		3' GAUGGACGUGACACUCGUGAAAC 5' dre-mir-20-2a __ .||||..||||.||||||||||. __ 5' GUACC--CACUAUGAGCACUUUU 3' ENSDART00000027285_P E:-23.9 S:127.000000 Loc:591 Cons: 80.95%(fru)
fru-mir-30c	ENSDART00000021275_P	ENSDARG00000010222	SINFRUG00000150831		ENSDARG00000010222 4001 (4001 nt) [CYTOSOL AMINOPEPTIDASE EC_3.4.11.1 LEUCINE AMINOPEPTIDASE LAP LEUCYL AMINOPEPTIDASE PROLINE AMINOPEPTIDASE EC_3.4.11.- 5 PROLYL AMINOPEPTIDASE;] [Cytosol aminopeptidase:Cytosol aminopeptidase;]	1	23.34	127	SINFRUG00000150831 (fru-miR-30c)		dre-mir-133-1b dre-mir-133-1a fru-mir-30c		3' CGAC-UCUCACAUCCUACAAAUGU 5' fru-mir-30c __ |.||.|||.|||.||:|||||||| __ 5' GGUGAAGAUUGU-GGGUGUUUACA 3' ENSDART00000021275_P E:-23.34 S:127.000000 Loc:1561 Cons: 78.26%(fru)
dre-mir-172	ENSDART00000023118_P	ENSDARG00000009016	SINFRUG00000124282		ENSDARG00000009016 4001 (4001 nt) [AMBIGUOUS;] []	1	30.32	127	SINFRUG00000124282 (dre-miR-172)		fru-mir-135-1b dre-mir-172 dre-mir-27-2a dre-mir-34 fru-mir-9g dre-mir-9b dre-mir-9a dre-mir-9e dre-mir-9c dre-mir-9f dre-mir-9d		3' UUGUUGGUCGAUUCUGUGACGGU 5' dre-mir-172 __ ..||||||...|||||||||||: __ 5' UUCAACCA---AAGACACUGCCG 3' ENSDART00000023118_P E:-30.32 S:127.000000 Loc:2775 Cons: 70.00%(fru)
dre-mir-34	ENSDART00000023118_P	ENSDARG00000009016	SINFRUG00000124282		ENSDARG00000009016 4001 (4001 nt) [AMBIGUOUS;] []	1	30.32	127	SINFRUG00000124282 (dre-miR-34)		fru-mir-135-1b dre-mir-172 dre-mir-27-2a dre-mir-34 fru-mir-9g dre-mir-9b dre-mir-9a dre-mir-9e dre-mir-9c dre-mir-9f dre-mir-9d		3' UGUUGGUCGAUUCUGUGACGGU 5' dre-mir-34 __ .||||||...|||||||||||: __ 5' UCAACCA---AAGACACUGCCG 3' ENSDART00000023118_P E:-30.32 S:127.000000 Loc:2775 Cons: 73.68%(fru)
fru-mir-29-12b	ENSDART00000024769_P	ENSDARG00000010833	SINFRUG00000126630		ENSDARG00000010833 4001 (4001 nt) [SH3 DOMAIN BINDING GLUTAMIC ACID RICH;] [SH3-binding, glutamic acid-rich protein:SH3-binding, glutamic acid-rich protein;]	1	24.7	127	SINFRUG00000140943 (fru-miR-29-12b)		fru-mir-29-12b		3' AUUGUGGCUAAAGUUUACCACGAUC 5' fru-mir-29-12b __ .:::.||.:||.|||:|||||:||| __ 5' AGGUUCCUGUUGCAAGUGGUGUUAG 3' ENSDART00000024769_P E:-24.700001 S:127.000000 Loc:618 Cons: 72.00%(fru)
dre-mir-17-1c	ENSDART00000014877_P	ENSDARG00000014891	SINFRUG00000128271		ROUNDABOUT HOMOLOG 2. [Source:RefSeq;Acc:NM_131633] ENSDARG00000014891 (1) (353113 353113 390493 390493 520006) 4001 (4001 nt) [ROUNDABOUT;] []	1	18.59	127	SINFRUG00000128271 (fru-miR-17-1c)		dre-mir-17-1a dre-mir-17-1c dre-mir-24-1	GO:0007186-> GO:0001584->rhodopsin-like receptor activity GO:0016021->integral to membrane	3' UGAUGGACGUGAUAUUCGUGAAAU 5' dre-mir-17-1c __ |:||::|.||..:||||||:|||: __ 5' AUUAUUUACAGAGUAAGCAUUUUG 3' ENSDART00000014877_P E:-18.59 S:127.000000 Loc:1345 Cons: 70.83%(fru)
dre-mir-103-3b	ENSDART00000009253_P	ENSDARG00000001865	SINFRUG00000146091		ENSDARG00000001865 4001 (4001 nt) [CORTICOLIBERIN PRECURSOR CORTICOTROPIN RELEASING FACTOR CRF CORTICOTROPIN RELEASING HORMONE;] [Corticotropin-releasing factor, CRF:Corticotropin-releasing factor, CRF;]	1	27.67	127	SINFRUG00000146091 (dre-miR-103-3b)		fru-mir-103-3 dre-mir-103-3b dre-mir-103-3a dre-mir-107-1a fru-mir-107-1 dre-mir-107-2		3' ACUUUCGGGACA---UGUUACGACGA 5' dre-mir-103-3b __ ||||..|:||||...|:|:||||||| __ 5' UGAAUACUCUGUACCAUAGUGCUGCU 3' ENSDART00000009253_P E:-27.67 S:127.000000 Loc:54 Cons: 73.08%(fru)
dre-mir-107-2	ENSDART00000009253_P	ENSDARG00000001865	SINFRUG00000146091		ENSDARG00000001865 4001 (4001 nt) [CORTICOLIBERIN PRECURSOR CORTICOTROPIN RELEASING FACTOR CRF CORTICOTROPIN RELEASING HORMONE;] [Corticotropin-releasing factor, CRF:Corticotropin-releasing factor, CRF;]	1	27.67	127	SINFRUG00000146091 (dre-miR-107-2)		fru-mir-103-3 dre-mir-103-3b dre-mir-103-3a dre-mir-107-1a fru-mir-107-1 dre-mir-107-2		3' ACUUUCGGGACA---UGUUACGACGA 5' dre-mir-107-2 __ ||||..|:||||...|:|:||||||| __ 5' UGAAUACUCUGUACCAUAGUGCUGCU 3' ENSDART00000009253_P E:-27.67 S:127.000000 Loc:54 Cons: 73.08%(fru)
dre-mir-98-3b	ENSDART00000005183_P	ENSDARG00000017727	SINFRUG00000130530		ENSDARG00000017727 1169 (1169 nt) [WEAKLY SIMILAR TO 52.2 KDA FRAGMENT; WEAKLY SIMILAR TO 52.2 KDA FRAGMENT;] [Zn-finger, C2H2 type:Zn-finger, C2H2 type; Zn-finger, C2H2 type:Zn-finger, C2H2 type;]	1	33.42	127	SINFRUG00000130530 (fru-miR-98-3b)		dre-mir-204 fru-mir-204-1b dre-mir-98-3b dre-mir-98-3a dre-mir-let7l-a1 dre-mir-let7l-a2		3' UUGGUGUGU-UGGAUGAUGGAGU 5' dre-mir-98-3b __ .||||.|||.||||:||:||||| __ 5' CACCA-ACACACCUGCUGCCUCA 3' ENSDART00000005183_P E:-33.419998 S:127.000000 Loc:560 Cons: 72.73%(fru)
dre-mir-98-3a	ENSDART00000005183_P	ENSDARG00000017727	SINFRUG00000130530		ENSDARG00000017727 1169 (1169 nt) [WEAKLY SIMILAR TO 52.2 KDA FRAGMENT; WEAKLY SIMILAR TO 52.2 KDA FRAGMENT;] [Zn-finger, C2H2 type:Zn-finger, C2H2 type; Zn-finger, C2H2 type:Zn-finger, C2H2 type;]	1	33.42	127	SINFRUG00000130530 (fru-miR-98-3a)		dre-mir-204 fru-mir-204-1b dre-mir-98-3b dre-mir-98-3a dre-mir-let7l-a1 dre-mir-let7l-a2		3' UUGGUGUGU-UGGAUGAUGGAGU 5' dre-mir-98-3a __ .||||.|||.||||:||:||||| __ 5' CACCA-ACACACCUGCUGCCUCA 3' ENSDART00000005183_P E:-33.419998 S:127.000000 Loc:560 Cons: 72.73%(fru)
dre-mir-let7l-a1	ENSDART00000005183_P	ENSDARG00000017727	SINFRUG00000130530		ENSDARG00000017727 1169 (1169 nt) [WEAKLY SIMILAR TO 52.2 KDA FRAGMENT; WEAKLY SIMILAR TO 52.2 KDA FRAGMENT;] [Zn-finger, C2H2 type:Zn-finger, C2H2 type; Zn-finger, C2H2 type:Zn-finger, C2H2 type;]	1	30.8	127	SINFRUG00000130530 (dre-miR-let7l-a1)		dre-mir-204 fru-mir-204-1b dre-mir-98-3b dre-mir-98-3a dre-mir-let7l-a1 dre-mir-let7l-a2		3' UUGGUAUGU-UGGAUGAUGGAGU 5' dre-mir-let7l-a1 __ .||||.|||.||||:||:||||| __ 5' CACCA-ACACACCUGCUGCCUCA 3' ENSDART00000005183_P E:-30.799999 S:127.000000 Loc:560 Cons: 72.73%(fru)
dre-mir-let7l-a2	ENSDART00000005183_P	ENSDARG00000017727	SINFRUG00000130530		ENSDARG00000017727 1169 (1169 nt) [WEAKLY SIMILAR TO 52.2 KDA FRAGMENT; WEAKLY SIMILAR TO 52.2 KDA FRAGMENT;] [Zn-finger, C2H2 type:Zn-finger, C2H2 type; Zn-finger, C2H2 type:Zn-finger, C2H2 type;]	1	30.8	127	SINFRUG00000130530 (dre-miR-let7l-a2)		dre-mir-204 fru-mir-204-1b dre-mir-98-3b dre-mir-98-3a dre-mir-let7l-a1 dre-mir-let7l-a2		3' UUGGUAUGU-UGGAUGAUGGAGU 5' dre-mir-let7l-a2 __ .||||.|||.||||:||:||||| __ 5' CACCA-ACACACCUGCUGCCUCA 3' ENSDART00000005183_P E:-30.799999 S:127.000000 Loc:560 Cons: 72.73%(fru)
fru-mir-200b-2a	ENSDART00000002555_P	ENSDARG00000005214	SINFRUG00000148381		EPHRIN-A5 PRECURSOR (EPH-RELATED RECEPTOR TYROSINE KINASE LIGAND 7) (LERK-7) (AL-1) (ZFEPHL4). [Source:SWISSPROT;Acc:P79728] ENSDARG00000005214 (-1) (36990 36990 37265 37265 0) 4001 (4001 nt) [EPHRIN PRECURSOR EPH RELATED RECEPTOR TYROSINE KINASE LIGAND LERK;] [Ephrin:Ephrin;]	1	20.28	127	SINFRUG00000148381 (fru-miR-200b-2a)		fru-mir-200b-2a dre-mir-200b-1a	GO:0005106->ephrin GO:0007399->neurogenesis GO:0016020->membrane GO:0007275->development	3' GUAGUAGUAAU-GGUCCGUCAUAAUCUC 5' fru-mir-200b-2a __ :||:||:||||.::|.|||||:|||.|. __ 5' UAUUAUUAUUAUUUAUGCAGUGUUAUAU 3' ENSDART00000002555_P E:-20.280001 S:127.000000 Loc:62 Cons: 71.43%(fru)
dre-mir-200b-1a	ENSDART00000002555_P	ENSDARG00000005214	SINFRUG00000148381		EPHRIN-A5 PRECURSOR (EPH-RELATED RECEPTOR TYROSINE KINASE LIGAND 7) (LERK-7) (AL-1) (ZFEPHL4). [Source:SWISSPROT;Acc:P79728] ENSDARG00000005214 (-1) (36990 36990 37265 37265 0) 4001 (4001 nt) [EPHRIN PRECURSOR EPH RELATED RECEPTOR TYROSINE KINASE LIGAND LERK;] [Ephrin:Ephrin;]	1	20.28	127	SINFRUG00000148381 (dre-miR-200b-1a)		fru-mir-200b-2a dre-mir-200b-1a	GO:0005106->ephrin GO:0007399->neurogenesis GO:0016020->membrane GO:0007275->development	3' GUAGUAGUAAU-GGUCCGUCAUAAUCUU 5' dre-mir-200b-1a __ :||:||:||||.::|.|||||:|||.|. __ 5' UAUUAUUAUUAUUUAUGCAGUGUUAUAU 3' ENSDART00000002555_P E:-20.280001 S:127.000000 Loc:62 Cons: 71.43%(fru)
dre-mir-18-3b	ENSDART00000006496_P	ENSDARG00000004185	SINFRUG00000143797		ENSDARG00000004185 2770 (2770 nt) [DNA MISMATCH REPAIR MLH3 MUTL HOMOLOG 3; DNA MISMATCH REPAIR MLH3 MUTL HOMOLOG 3;] []	1	20.49	126	SINFRUG00000143797 (dre-miR-18-3b)		dre-mir-18-3b dre-mir-18-3a dre-mir-184		3' AUUGAUGUGUU--CUACGUGGAAU 5' dre-mir-18-3b __ |||:.:||:||..|:|||||:||| __ 5' UAAUAGCAUAAUAGGUGCACUUUA 3' ENSDART00000006496_P E:-20.49 S:126.000000 Loc:1856 Cons: 70.83%(fru)
dre-mir-18-3a	ENSDART00000006496_P	ENSDARG00000004185	SINFRUG00000143797		ENSDARG00000004185 2770 (2770 nt) [DNA MISMATCH REPAIR MLH3 MUTL HOMOLOG 3; DNA MISMATCH REPAIR MLH3 MUTL HOMOLOG 3;] []	1	20.49	126	SINFRUG00000143797 (dre-miR-18-3a)		dre-mir-18-3b dre-mir-18-3a dre-mir-184		3' AUUGAUGUGUU--CUACGUGGAAU 5' dre-mir-18-3a __ |||:.:||:||..|:|||||:||| __ 5' UAAUAGCAUAAUAGGUGCACUUUA 3' ENSDART00000006496_P E:-20.49 S:126.000000 Loc:1856 Cons: 70.83%(fru)
dre-mir-19-1d	ENSDART00000007539_P	ENSDARG00000018268	SINFRUG00000133873		ENSDARG00000018268 4001 (4001 nt) [PHOSPHATASE 2A REGULATORY SUBUNIT B' PP2A SUBUNIT B' PR53 PHOSPHOTYROSYL PHOSPHATASE ACTIVATOR PTPA; PHOSPHATASE 2A REGULATORY SUBUNIT B' PP2A SUBUNIT B' PR53 PHOSPHOTYROSYL PHOSPHATASE ACTIVATOR PTPA;] [Phosphotyrosyl phosphatase activator, PTPA:Phosphotyrosyl phosphatase activator, PTPA; Phosphotyrosyl phosphatase activator, PTPA:Phosphotyrosyl phosphatase act…	1	22.65	126	SINFRUG00000133873 (dre-miR-19-1d)		dre-mir-19-1d dre-mir-19-1b		3' AGUCAAAACGUACCUAAACGUGU 5' dre-mir-19-1d __ |..||||||.||||.|||||||| __ 5' UAUGUUUUG-AUGGCUUUGCACA 3' ENSDART00000007539_P E:-22.65 S:126.000000 Loc:987 Cons: 72.73%(fru)
dre-mir-19-1b	ENSDART00000007539_P	ENSDARG00000018268	SINFRUG00000133873		ENSDARG00000018268 4001 (4001 nt) [PHOSPHATASE 2A REGULATORY SUBUNIT B' PP2A SUBUNIT B' PR53 PHOSPHOTYROSYL PHOSPHATASE ACTIVATOR PTPA; PHOSPHATASE 2A REGULATORY SUBUNIT B' PP2A SUBUNIT B' PR53 PHOSPHOTYROSYL PHOSPHATASE ACTIVATOR PTPA;] [Phosphotyrosyl phosphatase activator, PTPA:Phosphotyrosyl phosphatase activator, PTPA; Phosphotyrosyl phosphatase activator, PTPA:Phosphotyrosyl phosphatase act…	1	22.65	126	SINFRUG00000133873 (dre-miR-19-1b)		dre-mir-19-1d dre-mir-19-1b		3' AGUCAAAACGUACCUAAACGUGU 5' dre-mir-19-1b __ |..||||||.||||.|||||||| __ 5' UAUGUUUUG-AUGGCUUUGCACA 3' ENSDART00000007539_P E:-22.65 S:126.000000 Loc:987 Cons: 72.73%(fru)
fru-mir-142-1b-as	ENSDART00000003402	ENSDARG00000012990	SINFRUG00000130859		ENSDARG00000012990 493 (493 nt) [HOOK; HOOK; HOOK; HOOK;] []	1	26.86	126	SINFRUG00000130858 (fru-miR-142-1b-as)		fru-mir-142-1b-as dre-mir-145 dre-mir-29-4a		3' GGUAUUUCAUCUUUCGUGAUGAUUU 5' fru-mir-142-1b-as __ :|||:|||.||||||.:||:||::| __ 5' UCAUGAAGAAGAAAGAGCUGCUGGA 3' ENSDART00000003402 E:-26.860001 S:126.000000 Loc:332 Cons: 100.00%(fru)
dre-mir-10-1e	ENSDART00000009886_P	ENSDARG00000015044	SINFRUG00000150299		ENSDARG00000015044 4001 (4001 nt) [DYSTROPHIN;] [Zn-finger, ZZ type:Zn-finger, ZZ type;]	1	25.01	126	SINFRUG00000150299 (dre-miR-10-1e)		fru-mir-10c dre-mir-10-1e dre-mir-10-2a		3' GUGUUUAAGCCAAGAUGUCCCAU 5' dre-mir-10-1e __ ..:|:|||:.|||:|:||||||| __ 5' AUUAGAUUU-GUUUUGCAGGGUA 3' ENSDART00000009886_P E:-25.01 S:126.000000 Loc:1541 Cons: 72.73%(fru)
dre-mir-10-2a	ENSDART00000009886_P	ENSDARG00000015044	SINFRUG00000150299		ENSDARG00000015044 4001 (4001 nt) [DYSTROPHIN;] [Zn-finger, ZZ type:Zn-finger, ZZ type;]	1	25.01	126	SINFRUG00000150299 (dre-miR-10-2a)		fru-mir-10c dre-mir-10-1e dre-mir-10-2a		3' GUGUUUAAGCCAAGAUGUCCCAU 5' dre-mir-10-2a __ ..:|:|||:.|||:|:||||||| __ 5' AUUAGAUUU-GUUUUGCAGGGUA 3' ENSDART00000009886_P E:-25.01 S:126.000000 Loc:1541 Cons: 72.73%(fru)
dre-mir-34-3b	ENSDART00000005161_P	ENSDARG00000008125	SINFRUG00000126037		ENSDARG00000008125 4001 (4001 nt) [AMBIGUOUS;] [Ubiquitin thiolesterase, family 2:Ubiquitin thiolesterase, family 2; CAP-Gly domain:CAP-Gly domain;]	1	25.41	126	SINFRUG00000126037 (dre-miR-34-3b)		dre-mir-184 fru-mir-205-1a dre-mir-205 dre-mir-34-3b		3' CAUUAGUUGAUUGACGUGACGGA 5' dre-mir-34-3b __ ||::|.||.|::|||||||||:| __ 5' GUGGU-AA-UGGCUGCACUGCUU 3' ENSDART00000005161_P E:-25.41 S:126.000000 Loc:1336 Cons: 71.43%(fru)
dre-mir-let7l-a	ENSDART00000025947_P	ENSDARG00000020781	SINFRUG00000134485		ENSDARG00000020781 4001 (4001 nt) [COLLAGEN ALPHA CHAIN; COLLAGEN ALPHA CHAIN; COLLAGEN ALPHA CHAIN; COLLAGEN ALPHA CHAIN; COLLAGEN ALPHA CHAIN; COLLAGEN ALPHA CHAIN; COLLAGEN ALPHA CHAIN;] [Collagen triple helix repeat:Collagen triple helix repeat; Type 4 procollagen, C-terminal repeat:Type 4 procollagen, C-terminal repeat; Collagen triple helix repeat:Collagen triple helix repeat; Type 4 procol…	1	22.07	126	SINFRUG00000134485 (dre-miR-let7l-a)		dre-mir-103-3b dre-mir-107-2 dre-mir-9a dre-mir-9b dre-mir-9e dre-mir-9c dre-mir-9f dre-mir-9d fru-mir-9g dre-mir-98-3a dre-mir-98-3b dre-mir-let7l-a dre-mir-let7l-a1 dre-mir-let7l-a2 dre-mir-let7l-b1 dre-mir-let7l-c1 fru-mir-let7l-c2 dre-mir-let7l-d1 fru-mir-let7l-d2		3' UUGAUAUGUUGGAUGAUGGAGU 5' dre-mir-let7l-a __ ||:|.|.:|||:||:||||||| __ 5' AAUU-UCUAACUUAUUACCUCA 3' ENSDART00000025947_P E:-22.07 S:126.000000 Loc:232 Cons: 85.71%(fru)
dre-mir-let7l-b1	ENSDART00000025947_P	ENSDARG00000020781	SINFRUG00000134485		ENSDARG00000020781 4001 (4001 nt) [COLLAGEN ALPHA CHAIN; COLLAGEN ALPHA CHAIN; COLLAGEN ALPHA CHAIN; COLLAGEN ALPHA CHAIN; COLLAGEN ALPHA CHAIN; COLLAGEN ALPHA CHAIN; COLLAGEN ALPHA CHAIN;] [Collagen triple helix repeat:Collagen triple helix repeat; Type 4 procollagen, C-terminal repeat:Type 4 procollagen, C-terminal repeat; Collagen triple helix repeat:Collagen triple helix repeat; Type 4 procol…	1	22.07	126	SINFRUG00000134485 (dre-miR-let7l-b1)		dre-mir-103-3b dre-mir-107-2 dre-mir-9a dre-mir-9b dre-mir-9e dre-mir-9c dre-mir-9f dre-mir-9d fru-mir-9g dre-mir-98-3a dre-mir-98-3b dre-mir-let7l-a dre-mir-let7l-a1 dre-mir-let7l-a2 dre-mir-let7l-b1 dre-mir-let7l-c1 fru-mir-let7l-c2 dre-mir-let7l-d1 fru-mir-let7l-d2		3' UUGAUAUGUUGGAUGAUGGAGU 5' dre-mir-let7l-b1 __ ||:|.|.:|||:||:||||||| __ 5' AAUU-UCUAACUUAUUACCUCA 3' ENSDART00000025947_P E:-22.07 S:126.000000 Loc:232 Cons: 85.71%(fru)
dre-mir-let7l-c1	ENSDART00000025947_P	ENSDARG00000020781	SINFRUG00000134485		ENSDARG00000020781 4001 (4001 nt) [COLLAGEN ALPHA CHAIN; COLLAGEN ALPHA CHAIN; COLLAGEN ALPHA CHAIN; COLLAGEN ALPHA CHAIN; COLLAGEN ALPHA CHAIN; COLLAGEN ALPHA CHAIN; COLLAGEN ALPHA CHAIN;] [Collagen triple helix repeat:Collagen triple helix repeat; Type 4 procollagen, C-terminal repeat:Type 4 procollagen, C-terminal repeat; Collagen triple helix repeat:Collagen triple helix repeat; Type 4 procol…	1	22.07	126	SINFRUG00000134485 (fru-miR-let7l-c1)		dre-mir-103-3b dre-mir-107-2 dre-mir-9a dre-mir-9b dre-mir-9e dre-mir-9c dre-mir-9f dre-mir-9d fru-mir-9g dre-mir-98-3a dre-mir-98-3b dre-mir-let7l-a dre-mir-let7l-a1 dre-mir-let7l-a2 dre-mir-let7l-b1 dre-mir-let7l-c1 fru-mir-let7l-c2 dre-mir-let7l-d1 fru-mir-let7l-d2		3' UUGAUAUGUUGGAUGAUGGAGU 5' dre-mir-let7l-c1 __ ||:|.|.:|||:||:||||||| __ 5' AAUU-UCUAACUUAUUACCUCA 3' ENSDART00000025947_P E:-22.07 S:126.000000 Loc:232 Cons: 85.71%(fru)
fru-mir-let7l-c2	ENSDART00000025947_P	ENSDARG00000020781	SINFRUG00000134485		ENSDARG00000020781 4001 (4001 nt) [COLLAGEN ALPHA CHAIN; COLLAGEN ALPHA CHAIN; COLLAGEN ALPHA CHAIN; COLLAGEN ALPHA CHAIN; COLLAGEN ALPHA CHAIN; COLLAGEN ALPHA CHAIN; COLLAGEN ALPHA CHAIN;] [Collagen triple helix repeat:Collagen triple helix repeat; Type 4 procollagen, C-terminal repeat:Type 4 procollagen, C-terminal repeat; Collagen triple helix repeat:Collagen triple helix repeat; Type 4 procol…	1	22.07	126	SINFRUG00000134485 (fru-miR-let7l-c2)		dre-mir-103-3b dre-mir-107-2 dre-mir-9a dre-mir-9b dre-mir-9e dre-mir-9c dre-mir-9f dre-mir-9d fru-mir-9g dre-mir-98-3a dre-mir-98-3b dre-mir-let7l-a dre-mir-let7l-a1 dre-mir-let7l-a2 dre-mir-let7l-b1 dre-mir-let7l-c1 fru-mir-let7l-c2 dre-mir-let7l-d1 fru-mir-let7l-d2		3' UUGAUAUGUUGGAUGAUGGAGU 5' fru-mir-let7l-c2 __ ||:|.|.:|||:||:||||||| __ 5' AAUU-UCUAACUUAUUACCUCA 3' ENSDART00000025947_P E:-22.07 S:126.000000 Loc:232 Cons: 85.71%(fru)
dre-mir-let7l-d1	ENSDART00000025947_P	ENSDARG00000020781	SINFRUG00000134485		ENSDARG00000020781 4001 (4001 nt) [COLLAGEN ALPHA CHAIN; COLLAGEN ALPHA CHAIN; COLLAGEN ALPHA CHAIN; COLLAGEN ALPHA CHAIN; COLLAGEN ALPHA CHAIN; COLLAGEN ALPHA CHAIN; COLLAGEN ALPHA CHAIN;] [Collagen triple helix repeat:Collagen triple helix repeat; Type 4 procollagen, C-terminal repeat:Type 4 procollagen, C-terminal repeat; Collagen triple helix repeat:Collagen triple helix repeat; Type 4 procol…	1	22.07	126	SINFRUG00000134485 (fru-miR-let7l-d1)		dre-mir-103-3b dre-mir-107-2 dre-mir-9a dre-mir-9b dre-mir-9e dre-mir-9c dre-mir-9f dre-mir-9d fru-mir-9g dre-mir-98-3a dre-mir-98-3b dre-mir-let7l-a dre-mir-let7l-a1 dre-mir-let7l-a2 dre-mir-let7l-b1 dre-mir-let7l-c1 fru-mir-let7l-c2 dre-mir-let7l-d1 fru-mir-let7l-d2		3' UUGAUAUGUUGGAUGAUGGAGU 5' dre-mir-let7l-d1 __ ||:|.|.:|||:||:||||||| __ 5' AAUU-UCUAACUUAUUACCUCA 3' ENSDART00000025947_P E:-22.07 S:126.000000 Loc:232 Cons: 85.71%(fru)
fru-mir-let7l-d2	ENSDART00000025947_P	ENSDARG00000020781	SINFRUG00000134485		ENSDARG00000020781 4001 (4001 nt) [COLLAGEN ALPHA CHAIN; COLLAGEN ALPHA CHAIN; COLLAGEN ALPHA CHAIN; COLLAGEN ALPHA CHAIN; COLLAGEN ALPHA CHAIN; COLLAGEN ALPHA CHAIN; COLLAGEN ALPHA CHAIN;] [Collagen triple helix repeat:Collagen triple helix repeat; Type 4 procollagen, C-terminal repeat:Type 4 procollagen, C-terminal repeat; Collagen triple helix repeat:Collagen triple helix repeat; Type 4 procol…	1	22.07	126	SINFRUG00000134485 (fru-miR-let7l-d2)		dre-mir-103-3b dre-mir-107-2 dre-mir-9a dre-mir-9b dre-mir-9e dre-mir-9c dre-mir-9f dre-mir-9d fru-mir-9g dre-mir-98-3a dre-mir-98-3b dre-mir-let7l-a dre-mir-let7l-a1 dre-mir-let7l-a2 dre-mir-let7l-b1 dre-mir-let7l-c1 fru-mir-let7l-c2 dre-mir-let7l-d1 fru-mir-let7l-d2		3' UUGAUAUGUUGGAUGAUGGAGU 5' fru-mir-let7l-d2 __ ||:|.|.:|||:||:||||||| __ 5' AAUU-UCUAACUUAUUACCUCA 3' ENSDART00000025947_P E:-22.07 S:126.000000 Loc:232 Cons: 85.71%(fru)
fru-mir-17-1e-as	ENSDART00000010563_P	ENSDARG00000010286	SINFRUG00000154049		ENSDARG00000010286 4001 (4001 nt) [CARBONIC ANHYDRASE EC_4.2.1.1 CARBONATE DEHYDRATASE CA; CARBONIC ANHYDRASE EC_4.2.1.1 CARBONATE DEHYDRATASE CA; CARBONIC ANHYDRASE EC_4.2.1.1 CARBONATE DEHYDRATASE CA;] [Carbonic anhydrase, eukaryotic:Carbonic anhydrase, eukaryotic; Carbonic anhydrase, eukaryotic:Carbonic anhydrase, eukaryotic; Carbonic anhydrase, eukaryotic:Carbonic anhydrase, eukaryotic;]	1	25.11	126	SINFRUG00000154049 (fru-miR-17-1e-as)		fru-mir-17-1e-as		3' UCUUCACGAGUGUGACGUCA 5' fru-mir-17-1e-as __ |||.||.:|||||||||||. __ 5' AGAUGUUUUCACACUGCAGG 3' ENSDART00000010563_P E:-25.110001 S:126.000000 Loc:1095 Cons: 75.00%(fru)
dre-mir-196-1c	ENSDART00000017290_P	ENSDARG00000017447	SINFRUG00000155129		ENSDARG00000017447 4001 (4001 nt) [EC_6.3.2.19 UBIQUITIN CONJUGATING ENZYME E2 UBIQUITIN LIGASE UBIQUITIN CARRIER;] [Ubiquitin-conjugating enzymes:Ubiquitin-conjugating enzymes;]	1	30.3	126	SINFRUG00000155129 (dre-miR-196-1c)		dre-mir-194 fru-mir-194-1a dre-mir-196-1a dre-mir-196-1c dre-mir-196-1b dre-mir-196-1e		3' GGUUGUUGUACUUUGAUGGAU 5' dre-mir-196-1c __ .|||||:.|||||:||:|||: __ 5' GCAACAGGAUGAAGCUGCCUG 3' ENSDART00000017290_P E:-30.299999 S:126.000000 Loc:1044 Cons: 71.43%(fru)
dre-mir-196-1b	ENSDART00000017290_P	ENSDARG00000017447	SINFRUG00000155129		ENSDARG00000017447 4001 (4001 nt) [EC_6.3.2.19 UBIQUITIN CONJUGATING ENZYME E2 UBIQUITIN LIGASE UBIQUITIN CARRIER;] [Ubiquitin-conjugating enzymes:Ubiquitin-conjugating enzymes;]	1	30.3	126	SINFRUG00000155129 (fru-miR-196-1b)		dre-mir-194 fru-mir-194-1a dre-mir-196-1a dre-mir-196-1c dre-mir-196-1b dre-mir-196-1e		3' GGUUGUUGUACUUUGAUGGAU 5' dre-mir-196-1b __ .|||||:.|||||:||:|||: __ 5' GCAACAGGAUGAAGCUGCCUG 3' ENSDART00000017290_P E:-30.299999 S:126.000000 Loc:1044 Cons: 71.43%(fru)
dre-mir-20-1b	ENSDART00000014707_P	ENSDARG00000004416	SINFRUG00000141092		ENSDARG00000004416 4001 (4001 nt) [AMBIGUOUS;] []	1	17.48	126	SINFRUG00000141092 (fru-miR-20-1b)		dre-mir-20-1b dre-mir-20-1 fru-mir-204-1a dre-mir-7-1a		3' GAUGGACGUGAUAUUCGUGAAAU 5' dre-mir-20-1b __ ||::.|.||:.|||||||:|||| __ 5' CUGUAU-CAUAAUAAGCAUUUUA 3' ENSDART00000014707_P E:-17.48 S:126.000000 Loc:310 Cons: 72.73%(fru)
dre-mir-20-1	ENSDART00000014707_P	ENSDARG00000004416	SINFRUG00000141092		ENSDARG00000004416 4001 (4001 nt) [AMBIGUOUS;] []	1	17.48	126	SINFRUG00000141092 (fru-miR-20-1)		dre-mir-20-1b dre-mir-20-1 fru-mir-204-1a dre-mir-7-1a		3' GAUGGACGUGAUAUUCGUGAAAU 5' dre-mir-20-1 __ ||::.|.||:.|||||||:|||| __ 5' CUGUAU-CAUAAUAAGCAUUUUA 3' ENSDART00000014707_P E:-17.48 S:126.000000 Loc:310 Cons: 72.73%(fru)
dre-mir-103-3b	ENSDART00000024816_P	ENSDARG00000019735	SINFRUG00000152515		ENSDARG00000019735 4001 (4001 nt) [UNKNOWN;] []	1	27.62	126	SINFRUG00000152515 (dre-miR-103-3b)		dre-mir-103-3b dre-mir-107-2 dre-mir-143-1a dre-mir-15-3 dre-mir-15-2a dre-mir-98-3b dre-mir-98-3a		3' ACUUUC--GG-GACAUGUUACGACGA 5' dre-mir-103-3b __ ||||||..||.|||||.||||||||| __ 5' UGAAAGAUCCGCUGUA-AAUGCUGCU 3' ENSDART00000024816_P E:-27.620001 S:126.000000 Loc:1410 Cons: 80.00%(fru)
dre-mir-107-2	ENSDART00000024816_P	ENSDARG00000019735	SINFRUG00000152515		ENSDARG00000019735 4001 (4001 nt) [UNKNOWN;] []	1	27.62	126	SINFRUG00000152515 (dre-miR-107-2)		dre-mir-103-3b dre-mir-107-2 dre-mir-143-1a dre-mir-15-3 dre-mir-15-2a dre-mir-98-3b dre-mir-98-3a		3' ACUUUC--GG-GACAUGUUACGACGA 5' dre-mir-107-2 __ ||||||..||.|||||.||||||||| __ 5' UGAAAGAUCCGCUGUA-AAUGCUGCU 3' ENSDART00000024816_P E:-27.620001 S:126.000000 Loc:1410 Cons: 80.00%(fru)
dre-mir10-2b	ENSDART00000024359_P	ENSDARG00000018261	SINFRUG00000128383		ENSDARG00000018261 4001 (4001 nt) [CYCLASE EC_4.6.1.2;] [Guanylate cyclase:Guanylate cyclase;]	1	30.87	126	SINFRUG00000128383 (dre-miR10-2b)		dre-mir-10-2a dre-mir-10-1b fru-mir-10c dre-mir-10-1e dre-mir-184 dre-mir-25 dre-mir10-2b		3' GUGUGUAAGCCAAGAUGUCCCAU 5' dre-mir10-2b __ ||:.|||||||..|||||||||: __ 5' CAUUCAUUCGG--CUACAGGGUG 3' ENSDART00000024359_P E:-30.870001 S:126.000000 Loc:798 Cons: 71.43%(fru)
dre-mir-7-1a	ENSDART00000026900_P	ENSDARG00000011772	SINFRUG00000127720		ENSDARG00000011772 4001 (4001 nt) [BACULOVIRAL IAP REPEAT CONTAINING INHIBITOR OF APOPTOSIS IAP; BACULOVIRAL IAP REPEAT CONTAINING INHIBITOR OF APOPTOSIS IAP; BACULOVIRAL IAP REPEAT CONTAINING INHIBITOR OF APOPTOSIS IAP; BACULOVIRAL IAP REPEAT CONTAINING INHIBITOR OF APOPTOSIS IAP; BACULOVIRAL IAP REPEAT CONTAINING INHIBITOR OF APOPTOSIS IAP; BACULOVIRAL IAP REPEAT CONTAINING INHIBITOR OF APOPTOS…	1	25.07	126	SINFRUG00000127720 (dre-miR-7-1a)		dre-mir-7-1a		3' UUGUUUUAGUGUU-CAGAAGGU 5' dre-mir-7-1a __ |||||::||||||.||:||:|| __ 5' AACAAGGUCACAAUGUUUUUCA 3' ENSDART00000026900_P E:-25.07 S:126.000000 Loc:1879 Cons: 77.27%(fru)
dre-mir-196-1c	ENSDART00000004823_P	ENSDARG00000021279	SINFRUG00000152971		CD36 ANTIGEN (COLLAGEN TYPE I RECEPTOR, THROMBOSPONDIN RECEPTOR)-LIKE 2. [Source:RefSeq;Acc:NM_173259] ENSDARG00000021279 (1) (591140 591140 606863 606863 646173) 4001 (4001 nt) [LYSOSOME MEMBRANE II LIMP II 85 KDA LYSOSOMAL MEMBRANE SIALOGLYCOPROTEIN LGP85 CD36 ANTIGEN 2; LYSOSOME MEMBRANE II LIMP II 85 KDA LYSOSOMAL MEMBRANE SIALOGLYCOPROTEIN LGP85 CD36 ANTIGEN 2; LYSOSOME MEMBRANE II LIMP II 8…	1	24.16	125	SINFRUG00000152971 (dre-miR-196-1c)		dre-mir-196-1e dre-mir-196-1d dre-mir-196-1c dre-mir-196-1a dre-mir-196-1b fru-mir-304 dre-mir-34	GO:0007155->cell adhesion GO:0016020->membrane GO:0004872->receptor activity GO:0005764->lysosome GO:0005194->cell adhesion molecule activity	3' GGUUG--UUGUACUUUGAUGGAU 5' dre-mir-196-1c __ .||||..||.||||||||:|:|| __ 5' ACAACAAAAGAUGAAACUGCUUA 3' ENSDART00000004823_P E:-24.16 S:125.000000 Loc:1415 Cons: 78.26%(fru)
dre-mir-196-1b	ENSDART00000004823_P	ENSDARG00000021279	SINFRUG00000152971		CD36 ANTIGEN (COLLAGEN TYPE I RECEPTOR, THROMBOSPONDIN RECEPTOR)-LIKE 2. [Source:RefSeq;Acc:NM_173259] ENSDARG00000021279 (1) (591140 591140 606863 606863 646173) 4001 (4001 nt) [LYSOSOME MEMBRANE II LIMP II 85 KDA LYSOSOMAL MEMBRANE SIALOGLYCOPROTEIN LGP85 CD36 ANTIGEN 2; LYSOSOME MEMBRANE II LIMP II 85 KDA LYSOSOMAL MEMBRANE SIALOGLYCOPROTEIN LGP85 CD36 ANTIGEN 2; LYSOSOME MEMBRANE II LIMP II 8…	1	24.16	125	SINFRUG00000152971 (fru-miR-196-1b)		dre-mir-196-1e dre-mir-196-1d dre-mir-196-1c dre-mir-196-1a dre-mir-196-1b fru-mir-304 dre-mir-34	GO:0007155->cell adhesion GO:0016020->membrane GO:0004872->receptor activity GO:0005764->lysosome GO:0005194->cell adhesion molecule activity	3' GGUUG--UUGUACUUUGAUGGAU 5' dre-mir-196-1b __ .||||..||.||||||||:|:|| __ 5' ACAACAAAAGAUGAAACUGCUUA 3' ENSDART00000004823_P E:-24.16 S:125.000000 Loc:1415 Cons: 78.26%(fru)
dre-mir-17-1c	ENSDART00000008305_P	ENSDARG00000004248	SINFRUG00000130512		ENSDARG00000004248 4001 (4001 nt) [SIMILAR TO SYNTAXIN BINDING 4;] [PDZ/DHR/GLGF domain:PDZ/DHR/GLGF domain;]	1	18.03	125	SINFRUG00000130512 (fru-miR-17-1c)		dre-mir-17-1b dre-mir-17-1d dre-mir-17-1c fru-mir-17-1e		3' UGAUGGACGUGAUAUUCGUGAAAU 5' dre-mir-17-1c __ |.|:.|..||:|.||||||||||| __ 5' AAUGGC--CAUUUUAAGCACUUUA 3' ENSDART00000008305_P E:-18.030001 S:125.000000 Loc:897 Cons: 77.27%(fru)
fru-mir-17-1e	ENSDART00000008305_P	ENSDARG00000004248	SINFRUG00000130512		ENSDARG00000004248 4001 (4001 nt) [SIMILAR TO SYNTAXIN BINDING 4;] [PDZ/DHR/GLGF domain:PDZ/DHR/GLGF domain;]	1	17.83	125	SINFRUG00000130512 (fru-miR-17-1e)		dre-mir-17-1b dre-mir-17-1d dre-mir-17-1c fru-mir-17-1e		3' UGAUGGACGUGACAUUCGUGAAAU 5' fru-mir-17-1e __ |.|:.|..||:|.||||||||||| __ 5' AAUGGC--CAUUUUAAGCACUUUA 3' ENSDART00000008305_P E:-17.83 S:125.000000 Loc:897 Cons: 86.36%(fru)
dre-mir-96	ENSDART00000022348_P	ENSDARG00000007430	SINFRUG00000125676		ENSDARG00000007430 3514 (3514 nt) [PR DOMAIN ZINC FINGER 12;] [Zn-finger, C2H2 type:Zn-finger, C2H2 type; Nuclear protein SET:Nuclear protein SET;]	1	29.12	125	SINFRUG00000125676 (dre-miR-96)		dre-mir-15-1b dre-mir-17-1c dre-mir-17-1a fru-mir-93-2b dre-mir-96		3' UCGUUUUUACACGAUCACGGUUU 5' dre-mir-96 __ ||||.||:||||:.||||||:|: __ 5' AGCACAAGUGUGUCAGUGCCGAG 3' ENSDART00000022348_P E:-29.120001 S:125.000000 Loc:55 Cons: 82.61%(fru)
dre-mir-15-1a	ENSDART00000016591_P	ENSDARG00000009351	SINFRUG00000123824		ENSDARG00000009351 4001 (4001 nt) [FIBROBLAST GROWTH FACTOR FGF;] [Heparin-binding growth factor/Fibroblast growth factor:Heparin-binding growth factor/Fibroblast growth factor; Interleukin 1/heparin-binding growth factor:Interleukin 1/heparin-binding growth factor;]	1	27.29	125	SINFRUG00000123824 (fru-miR-15-1a)		dre-mir-100-2a dre-mir-15-1a dre-mir-15-1b dre-mir-98-3b dre-mir-98-3a dre-mir-let7l-a dre-mir-let7l-a1 dre-mir-let7l-a2 dre-mir-let7l-b1 dre-mir-let7l-c1 fru-mir-let7l-c2 dre-mir-let7l-d1 fru-mir-let7l-d2		3' GUGUUUGGUAAGACACGACGAU 5' dre-mir-15-1a __ :|||.:|||||||.|||||||. __ 5' UACAUGCCAUUCUUUGCUGCUU 3' ENSDART00000016591_P E:-27.290001 S:125.000000 Loc:184 Cons: 81.82%(fru)
dre-mir-15-1b	ENSDART00000016591_P	ENSDARG00000009351	SINFRUG00000123824		ENSDARG00000009351 4001 (4001 nt) [FIBROBLAST GROWTH FACTOR FGF;] [Heparin-binding growth factor/Fibroblast growth factor:Heparin-binding growth factor/Fibroblast growth factor; Interleukin 1/heparin-binding growth factor:Interleukin 1/heparin-binding growth factor;]	1	27.29	125	SINFRUG00000123824 (dre-miR-15-1b)		dre-mir-100-2a dre-mir-15-1a dre-mir-15-1b dre-mir-98-3b dre-mir-98-3a dre-mir-let7l-a dre-mir-let7l-a1 dre-mir-let7l-a2 dre-mir-let7l-b1 dre-mir-let7l-c1 fru-mir-let7l-c2 dre-mir-let7l-d1 fru-mir-let7l-d2		3' GUGUUUGGUAAGACACGACGAU 5' dre-mir-15-1b __ :|||.:|||||||.|||||||. __ 5' UACAUGCCAUUCUUUGCUGCUU 3' ENSDART00000016591_P E:-27.290001 S:125.000000 Loc:184 Cons: 81.82%(fru)
dre-mir-196-1c	ENSDART00000002884_P	ENSDARG00000016658	SINFRUG00000146328		ENSDARG00000016658 4001 (4001 nt) [HOMEOBOX; HOMEOBOX;] [Homeobox:Homeobox; Homeobox protein, antennapedia type:Homeobox protein, antennapedia type; Homeobox:Homeobox; Homeobox protein, antennapedia type:Homeobox protein, antennapedia type; Helix-turn-helix motif, lambda-like repressor:Helix-turn-helix motif, lambda-like repressor;]	1	25.47	125	SINFRUG00000146328 (dre-miR-196-1c)		dre-mir-16-2 fru-mir-17-1e-as dre-mir-196-1c dre-mir-196-1a dre-mir-196-1e dre-mir-196-1d dre-mir-196-1b		3' GGUUGUUGUACUUUGAUGGAU 5' dre-mir-196-1c __ ||||||||.|.|||||:|||| __ 5' CCAACAAC-UUAAACUGCCUA 3' ENSDART00000002884_P E:-25.469999 S:125.000000 Loc:937 Cons: 95.00%(fru)
dre-mir-196-1e	ENSDART00000002884_P	ENSDARG00000016658	SINFRUG00000146328		ENSDARG00000016658 4001 (4001 nt) [HOMEOBOX; HOMEOBOX;] [Homeobox:Homeobox; Homeobox protein, antennapedia type:Homeobox protein, antennapedia type; Homeobox:Homeobox; Homeobox protein, antennapedia type:Homeobox protein, antennapedia type; Helix-turn-helix motif, lambda-like repressor:Helix-turn-helix motif, lambda-like repressor;]	1	26.14	125	SINFRUG00000146328 (dre-miR-196-1e)		dre-mir-16-2 fru-mir-17-1e-as dre-mir-196-1c dre-mir-196-1a dre-mir-196-1e dre-mir-196-1d dre-mir-196-1b		3' GGUUGUUGUAUUUUGAUGGAU 5' dre-mir-196-1e __ ||||||||.|.|||||:|||| __ 5' CCAACAAC-UUAAACUGCCUA 3' ENSDART00000002884_P E:-26.139999 S:125.000000 Loc:937 Cons: 95.00%(fru)
dre-mir-196-1b	ENSDART00000002884_P	ENSDARG00000016658	SINFRUG00000146328		ENSDARG00000016658 4001 (4001 nt) [HOMEOBOX; HOMEOBOX;] [Homeobox:Homeobox; Homeobox protein, antennapedia type:Homeobox protein, antennapedia type; Homeobox:Homeobox; Homeobox protein, antennapedia type:Homeobox protein, antennapedia type; Helix-turn-helix motif, lambda-like repressor:Helix-turn-helix motif, lambda-like repressor;]	1	25.47	125	SINFRUG00000146328 (fru-miR-196-1b)		dre-mir-16-2 fru-mir-17-1e-as dre-mir-196-1c dre-mir-196-1a dre-mir-196-1e dre-mir-196-1d dre-mir-196-1b		3' GGUUGUUGUACUUUGAUGGAU 5' dre-mir-196-1b __ ||||||||.|.|||||:|||| __ 5' CCAACAAC-UUAAACUGCCUA 3' ENSDART00000002884_P E:-25.469999 S:125.000000 Loc:937 Cons: 95.00%(fru)
dre-mir-128	ENSDART00000016069_P	ENSDARG00000009148	SINFRUG00000124350		ENSDARG00000009148 4001 (4001 nt) [INTERFERON; INTERFERON;] [Interferon regulatory factor:Interferon regulatory factor; Interferon regulatory factor:Interferon regulatory factor;]	1	25.5	125	SINFRUG00000124350 (dre-miR-128)		dre-mir-128 fru-mir-128b fru-mir-128a		3' UUUUCUCUGGCCAAGUGACACU 5' dre-mir-128 __ |||||.||||||||.|||.||| __ 5' AAAAGUGACCGGUUAACUUUGA 3' ENSDART00000016069_P E:-25.5 S:125.000000 Loc:210 Cons: 77.27%(fru)
fru-mir-128b	ENSDART00000016069_P	ENSDARG00000009148	SINFRUG00000124350		ENSDARG00000009148 4001 (4001 nt) [INTERFERON; INTERFERON;] [Interferon regulatory factor:Interferon regulatory factor; Interferon regulatory factor:Interferon regulatory factor;]	1	25.5	125	SINFRUG00000124350 (fru-miR-128b)		dre-mir-128 fru-mir-128b fru-mir-128a		3' UUUUCUCUGGCCAAGUGACACU 5' fru-mir-128b __ |||||.||||||||.|||.||| __ 5' AAAAGUGACCGGUUAACUUUGA 3' ENSDART00000016069_P E:-25.5 S:125.000000 Loc:210 Cons: 77.27%(fru)
fru-mir-128a	ENSDART00000016069_P	ENSDARG00000009148	SINFRUG00000124350		ENSDARG00000009148 4001 (4001 nt) [INTERFERON; INTERFERON;] [Interferon regulatory factor:Interferon regulatory factor; Interferon regulatory factor:Interferon regulatory factor;]	1	25.5	125	SINFRUG00000124350 (fru-miR-128a)		dre-mir-128 fru-mir-128b fru-mir-128a		3' UUUUCUCUGGCCAAGUGACACU 5' fru-mir-128a __ |||||.||||||||.|||.||| __ 5' AAAAGUGACCGGUUAACUUUGA 3' ENSDART00000016069_P E:-25.5 S:125.000000 Loc:210 Cons: 77.27%(fru)
fru-mir-93-1b	ENSDART00000024956_P	ENSDARG00000010413	SINFRUG00000135606		ENSDARG00000010413 4001 (4001 nt) [ZINC FINGER;] [Zn-finger, C2H2 subtype:Zn-finger, C2H2 subtype; Zn-finger, C2H2 type:Zn-finger, C2H2 type; HMG-I and HMG-Y DNA-binding domain (A+T-hook):HMG-I and HMG-Y DNA-binding domain (A+T-hook);]	1	21.6	125	SINFRUG00000135606 (fru-miR-93-1b)		fru-mir-93-1b		3' GAUGGACGUGUU--U-GUCGUGAAAAC 5' fru-mir-93-1b __ :|||:..|||||..|.||||||||||. __ 5' UUACUAUCACAAUCAUCAGCACUUUUA 3' ENSDART00000024956_P E:-21.6 S:125.000000 Loc:1605 Cons: 70.37%(fru)
dre-mir-27-1a	ENSDART00000015471_P	ENSDARG00000003410	SINFRUG00000145965		ENSDARG00000003410 4001 (4001 nt) [ALDEHYDE DEHYDROGENASE DIMERIC NADP PREFERRING EC_1.2.1.5 ALDH CLASS 3; ALDEHYDE DEHYDROGENASE DIMERIC NADP PREFERRING EC_1.2.1.5 ALDH CLASS 3; ALDEHYDE DEHYDROGENASE DIMERIC NADP PREFERRING EC_1.2.1.5 ALDH CLASS 3; ALDEHYDE DEHYDROGENASE DIMERIC NADP PREFERRING EC_1.2.1.5 ALDH CLASS 3;] [Aldehyde dehydrogenase:Aldehyde dehydrogenase; Aldehyde dehydrogenase:Alde…	1	24.33	125	SINFRUG00000145965 (fru-miR-27-1a)		dre-mir-27-1a dre-mir-34-3a dre-mir-34-2b		3' CG-CCU-UGAAUCGGUGACACUU 5' dre-mir-27-1a __ ||.|.|.|:.||||||||||||| __ 5' GCAGCAUAUCUAGCCACUGUGAA 3' ENSDART00000015471_P E:-24.33 S:125.000000 Loc:2102 Cons: 73.91%(fru)
dre-mir-200a-1a	ENSDART00000018755_P	ENSDARG00000005209	SINFRUG00000132770		ENSDARG00000005209 4001 (4001 nt) [AMBIGUOUS;] []	1	20.88	125	SINFRUG00000132770 (fru-miR-200a-1a)		dre-mir-200a-1a		3' UUUGUAG-CAAUGGUCUGUCACAAUCUU 5' dre-mir-200a-1a __ |:|||||.|||:.||.:||.|||.|||| __ 5' AGACAUCAGUUGACAUGCACUGUAAGAA 3' ENSDART00000018755_P E:-20.879999 S:125.000000 Loc:2030 Cons: 71.43%(fru)
dre-mir-199-as	ENSDART00000007814_P	ENSDARG00000012089	SINFRUG00000145797		ENSDARG00000012089 4001 (4001 nt) [VOLTAGE DEPENDENT CALCIUM CHANNEL GAMMA 5 SUBUNIT NEURONAL VOLTAGE GATED CALCIUM CHANNEL GAMMA 5 SUBUNIT;] []	1	21.53	125	SINFRUG00000145797 (dre-miR-199-as)		dre-mir-199-as		3' UUGGUU-ACAC-GUCUGAUGACAU 5' dre-mir-199-as __ ||:::|.||||.:|||:||||||: __ 5' AAUUGAUUGUGAUAGAUUACUGUG 3' ENSDART00000007814_P E:-21.530001 S:125.000000 Loc:607 Cons: 75.00%(fru)
fru-mir-29-2c	ENSDART00000017047_P	ENSDARG00000019510	SINFRUG00000135545		ENSDARG00000019510 3146 (3146 nt) [TUBBY 4 TUBBY SUPERFAMILY;] [Tubby:Tubby;]	1	24.89	125	SINFRUG00000135545 (fru-miR-29-2c)		fru-mir-29-2c dre-mir-31-2a fru-mir-33b fru-mir-33-1b fru-mir-33-1a		3' UGUGACUAAAG-UUUACCACGAUC 5' fru-mir-29-2c __ |.|||||||||.:|||||||.||. __ 5' AAACUGAUUUCUGAAUGGUGGUAC 3' ENSDART00000017047_P E:-24.889999 S:125.000000 Loc:214 Cons: 70.83%(fru)
dre-mir-19-1a	ENSDART00000000533_P	ENSDARG00000000514	SINFRUG00000135887		ENSDARG00000000514 4001 (4001 nt) [AMBIGUOUS; AMBIGUOUS; AMBIGUOUS; AMBIGUOUS; AMBIGUOUS; AMBIGUOUS; AMBIGUOUS; AMBIGUOUS;] [Protein of unknown function DUF590:Protein of unknown function DUF590; Protein of unknown function DUF590:Protein of unknown function DUF590; Protein of unknown function DUF590:Protein of unknown function DUF590; Protein of unknown function DUF590:Protein of unknown functio…	1	23.63	125	SINFRUG00000125251 (fru-miR-19-1a)		dre-mir-19-1a dre-mir-19-1c		3' AGUCAAA-ACGUAUCUAAACGUGU 5' dre-mir-19-1a __ .||||||.||.:||||.||||||| __ 5' GCAGUUUGUG-GUAGACUUGCACA 3' ENSDART00000000533_P E:-23.629999 S:125.000000 Loc:68 Cons: 73.91%(fru)
dre-mir-19-1c	ENSDART00000000533_P	ENSDARG00000000514	SINFRUG00000135887		ENSDARG00000000514 4001 (4001 nt) [AMBIGUOUS; AMBIGUOUS; AMBIGUOUS; AMBIGUOUS; AMBIGUOUS; AMBIGUOUS; AMBIGUOUS; AMBIGUOUS;] [Protein of unknown function DUF590:Protein of unknown function DUF590; Protein of unknown function DUF590:Protein of unknown function DUF590; Protein of unknown function DUF590:Protein of unknown function DUF590; Protein of unknown function DUF590:Protein of unknown functio…	1	23.63	125	SINFRUG00000125251 (fru-miR-19-1c)		dre-mir-19-1a dre-mir-19-1c		3' AGUCAAA-ACGUAUCUAAACGUGU 5' dre-mir-19-1c __ .||||||.||.:||||.||||||| __ 5' GCAGUUUGUG-GUAGACUUGCACA 3' ENSDART00000000533_P E:-23.629999 S:125.000000 Loc:68 Cons: 73.91%(fru)
dre-mir-141-1b	ENSDART00000014790_P	ENSDARG00000002192	SINFRUG00000128683		ENSDARG00000002192 4001 (4001 nt) [DECORIN PRECURSOR BONE PROTEOGLYCAN II PG S2; DECORIN PRECURSOR BONE PROTEOGLYCAN II PG S2;] [Leucine-rich repeat:Leucine-rich repeat; Cysteine-rich flanking region, N-terminal:Cysteine-rich flanking region, N-terminal; Leucine-rich repeat:Leucine-rich repeat; Cysteine-rich flanking region, N-terminal:Cysteine-rich flanking region, N-terminal;]	1	22.29	125	SINFRUG00000128683 (dre-miR-141-1b)		dre-mir-141-1a dre-mir-141-1b dre-mir-34-2b dre-mir-34-3a fru-mir-93-1b		3' UGUAGCAAUGGUCUGUCACAA 5' dre-mir-141-1b __ ||||:|||..||||::||||| __ 5' ACAUUGUU--CAGAUGGUGUU 3' ENSDART00000014790_P E:-22.290001 S:125.000000 Loc:1192 Cons: 78.95%(fru)
fru-mir-204-1a	ENSDART00000026224_P	ENSDARG00000005519	SINFRUG00000145244		ENSDARG00000005519 4001 (4001 nt) [AMBIGUOUS; AMBIGUOUS;] [Proline-rich extensin:Proline-rich extensin; Proline-rich extensin:Proline-rich extensin;]	1	27.98	125	SINFRUG00000145243 (fru-miR-204-1a)		dre-mir-15-2a dre-mir-16-2 fru-mir-17-1e dre-mir-187 fru-mir-204-1a fru-mir-204-1b dre-mir-204		3' GUCCGUAUCC-UAUUGUUUCCCUU 5' fru-mir-204-1a __ :|||.:|.||.:|::||||||||| __ 5' UAGGGGUUGGUGUGGCAAAGGGAA 3' ENSDART00000026224_P E:-27.98 S:125.000000 Loc:2580 Cons: 79.17%(fru)
dre-mir-196-1e	ENSDART00000022483	ENSDARG00000005590	SINFRUG00000128213		ENSDARG00000005590 798 (798 nt) [METAL RESPONSE ELEMENT BINDING TRANSCRIPTION FACTOR 2 METAL RESPONSE ELEMENT DNA BINDING M96; METAL RESPONSE ELEMENT BINDING TRANSCRIPTION FACTOR 2 METAL RESPONSE ELEMENT DNA BINDING M96;] [Zn-finger-like, PHD finger:Zn-finger-like, PHD finger; HMG-I and HMG-Y DNA-binding domain (A+T-hook):HMG-I and HMG-Y DNA-binding domain (A+T-hook); Zn-finger-like, PHD finger:Z…	1	23.41	125	SINFRUG00000128213 (dre-miR-196-1e)		dre-mir-196-1a dre-mir-196-1e dre-mir-196-1b dre-mir-196-1c		3' GGUUGUUGU-AUUUUGAUGGAU 5' dre-mir-196-1e __ |||:||.||.|:|||||||||. __ 5' CCAGCACCAGUGAAACUACCUC 3' ENSDART00000022483 E:-23.41 S:125.000000 Loc:364 Cons: 72.73%(fru)
dre-mir-138-2	ENSDART00000015273	ENSDARG00000008620	SINFRUG00000130592		ENSDARG00000008620 746 (746 nt) [PRECURSOR;] [Fibronectin, type III:Fibronectin, type III; Fibrinogen, beta/gamma chain, C-terminal globular:Fibrinogen, beta/gamma chain, C-terminal globular;]	1	29.43	125	SINFRUG00000130592 (dre-miR-138-2)		dre-mir-138-2 dre-mir-138-1		3' GGGACUAAGUGUUGUGGUCGA 5' dre-mir-138-2 __ .||||...:|||||||||||| __ 5' GCCUG---UACAACACCAGCU 3' ENSDART00000015273 E:-29.43 S:125.000000 Loc:718 Cons: 77.78%(fru)
dre-mir-10-1a	ENSDART00000014176_P	ENSDARG00000015674	SINFRUG00000151513		HOMEOBOX PROTEIN MSH-C. [Source:SWISSPROT;Acc:Q01703] ENSDARG00000015674 (1) (520005 520005 521065 521065 534977) 4001 (4001 nt) [HOMEOBOX;] [Homeobox:Homeobox; Helix-turn-helix motif, lambda-like repressor:Helix-turn-helix motif, lambda-like repressor;]	1	25.72	125	SINFRUG00000142798 (dre-miR-10-1a)		dre-mir-10-1a fru-mir-10b fru-mir-10a dre-mir-10-1e dre-mir-10-1b dre-mir-10-2a	GO:0003700->transcription factor activity GO:0005634->nucleus GO:0005634->nucleus GO:0003677->DNA binding GO:0007275->development GO:0006355->regulation of transcription, DNA-dependent	3' GUGUUUA--GGCCUAGAUGUCCCAU 5' dre-mir-10-1a __ :.|.:||..|:|.:||||||||||| __ 5' UUCUGAUCACUGAGUCUACAGGGUA 3' ENSDART00000014176_P E:-25.719999 S:125.000000 Loc:1962 Cons: 72.00%(fru)
fru-mir-10a	ENSDART00000014176_P	ENSDARG00000015674	SINFRUG00000151513		HOMEOBOX PROTEIN MSH-C. [Source:SWISSPROT;Acc:Q01703] ENSDARG00000015674 (1) (520005 520005 521065 521065 534977) 4001 (4001 nt) [HOMEOBOX;] [Homeobox:Homeobox; Helix-turn-helix motif, lambda-like repressor:Helix-turn-helix motif, lambda-like repressor;]	1	25.72	125	SINFRUG00000142798 (fru-miR-10a)		dre-mir-10-1a fru-mir-10b fru-mir-10a dre-mir-10-1e dre-mir-10-1b dre-mir-10-2a	GO:0003700->transcription factor activity GO:0005634->nucleus GO:0005634->nucleus GO:0003677->DNA binding GO:0007275->development GO:0006355->regulation of transcription, DNA-dependent	3' UGUUUA--GGCCUAGAUGUCCCAU 5' fru-mir-10a __ .|.:||..|:|.:||||||||||| __ 5' UCUGAUCACUGAGUCUACAGGGUA 3' ENSDART00000014176_P E:-25.719999 S:125.000000 Loc:1962 Cons: 75.00%(fru)
dre-mir-141-1b	ENSDART00000027711_P	ENSDARG00000020370	SINFRUG00000129485		ENSDARG00000020370 4001 (4001 nt) [TRANSCRIPTION FACTOR SOX; TRANSCRIPTION FACTOR SOX; TRANSCRIPTION FACTOR SOX;] [HMG1/2 (high mobility group) box:HMG1/2 (high mobility group) box; HMG1/2 (high mobility group) box:HMG1/2 (high mobility group) box; HMG1/2 (high mobility group) box:HMG1/2 (high mobility group) box;]	1	22.59	125	SINFRUG00000129485 (dre-miR-141-1b)		dre-mir-122a dre-mir-141-1b dre-mir-141-1a		3' UG-UAGCAAUGGUCUGUCACAA 5' dre-mir-141-1b __ ||.||.||||.|||:||||||| __ 5' ACAAUGGUUA-CAGGCAGUGUU 3' ENSDART00000027711_P E:-22.59 S:125.000000 Loc:2352 Cons: 71.43%(fru)
dre-mir-15-3	ENSDART00000023982_P	ENSDARG00000002793	SINFRUG00000135379		ENSDARG00000002793 4001 (4001 nt) [UNKNOWN; UNKNOWN; UNKNOWN;] [Laminin-type EGF-like domain:Laminin-type EGF-like domain; EGF-like domain:EGF-like domain; NHL repeat:NHL repeat; Laminin-type EGF-like domain:Laminin-type EGF-like domain; EGF-like domain:EGF-like domain; NHL repeat:NHL repeat; Laminin-type EGF-like domain:Laminin-type EGF-like domain; EGF-like domain:EGF-like domain; NHL repeat:NH…	1	26.19	125	SINFRUG00000135379 (dre-miR-15-3)		dre-mir-15-3 dre-mir-27-1a		3' ACUUUUGGUACUGCGCGACGAA 5' dre-mir-15-3 __ ||:|.:||..|||||||||:|| __ 5' UGGAUGCC--GACGCGCUGUUU 3' ENSDART00000023982_P E:-26.190001 S:125.000000 Loc:1996 Cons: 70.00%(fru)
fru-mir-17-1e	ENSDART00000010604_P	ENSDARG00000005989	SINFRUG00000123113		ENSDARG00000005989 4001 (4001 nt) [RAL GUANINE NUCLEOTIDE DISSOCIATION STIMULATOR RALGDS; RAL GUANINE NUCLEOTIDE DISSOCIATION STIMULATOR RALGDS; RAL GUANINE NUCLEOTIDE DISSOCIATION STIMULATOR RALGDS;] [Guanine-nucleotide dissociation stimulator CDC25:Guanine-nucleotide dissociation stimulator CDC25; Guanine nucleotide exchange factor for Ras-like GTPases; N-terminal motif:Guanine nucleotide excha…	1	20.11	125	SINFRUG00000123113 (fru-miR-17-1e)		fru-mir-17-1e dre-mir-17-1b		3' UGAUGGACGUGACAUUCGUGAAAU 5' fru-mir-17-1e __ .||:|||..|.|.||||||:|||| __ 5' UCUGCCU--AAUCUAAGCAUUUUA 3' ENSDART00000010604_P E:-20.110001 S:125.000000 Loc:911 Cons: 72.73%(fru)
dre-mir-20-1	ENSDART00000022046	ENSDARG00000007939	SINFRUG00000123254		ENSDARG00000007939 642 (642 nt) [AMBIGUOUS; AMBIGUOUS;] [Ankyrin:Ankyrin; Zn-finger, DHHC type:Zn-finger, DHHC type; Ankyrin:Ankyrin; Zn-finger, DHHC type:Zn-finger, DHHC type;]	1	20.33	125	SINFRUG00000123253 (fru-miR-20-1)		dre-mir-20-1 dre-mir-20-1b		3' GAUGGACGU-GAUAUUCGUGAAAU 5' dre-mir-20-1 __ ..:||.|.|..||||||||||||| __ 5' ACGCCAGAAGAUAUAAGCACUUUA 3' ENSDART00000022046 E:-20.33 S:125.000000 Loc:450 Cons: 70.83%(fru)
dre-mir-20-1b	ENSDART00000022046	ENSDARG00000007939	SINFRUG00000123254		ENSDARG00000007939 642 (642 nt) [AMBIGUOUS; AMBIGUOUS;] [Ankyrin:Ankyrin; Zn-finger, DHHC type:Zn-finger, DHHC type; Ankyrin:Ankyrin; Zn-finger, DHHC type:Zn-finger, DHHC type;]	1	20.33	125	SINFRUG00000123253 (fru-miR-20-1b)		dre-mir-20-1 dre-mir-20-1b		3' GAUGGACGU-GAUAUUCGUGAAAU 5' dre-mir-20-1b __ ..:||.|.|..||||||||||||| __ 5' ACGCCAGAAGAUAUAAGCACUUUA 3' ENSDART00000022046 E:-20.33 S:125.000000 Loc:450 Cons: 70.83%(fru)
dre-mir-196-1e	ENSDART00000021101_P	ENSDARG00000014877	SINFRUG00000155255		ENSDARG00000014877 4001 (4001 nt) [NITRIC OXIDE SYNTHASE EC_1.14.13.39 NOS TYPE NOS;] [Flavoprotein pyridine nucleotide cytochrome reductase:Flavoprotein pyridine nucleotide cytochrome reductase; Flavodoxin-like domain:Flavodoxin-like domain; Oxidoreductase FAD/NAD(P)-binding:Oxidoreductase FAD/NAD(P)-binding; Flavodoxin:Flavodoxin; FAD-binding:FAD-binding;]	1	22.81	125	SINFRUG00000155255 (dre-miR-196-1e)		dre-mir-196-1e		3' GGUUGUUGUAUUUUGAUGGAU 5' dre-mir-196-1e __ :.|||||||.||||||:|||: __ 5' UAAACAACA-AAAACUGCCUG 3' ENSDART00000021101_P E:-22.809999 S:125.000000 Loc:389 Cons: 85.00%(fru)
fru-mir-33-1b	ENSDART00000024817_P	ENSDARG00000006528	SINFRUG00000144633		ENSDARG00000006528 4001 (4001 nt) [JUNCTIONAL ADHESION MOLECULE 2 PRECURSOR VASCULAR ENDOTHELIAL JUNCTION ASSOCIATED MOLECULE VE JAM;] [Immunoglobulin-like:Immunoglobulin-like;]	1	24.46	124	SINFRUG00000144633 (fru-miR-33-1b)		fru-mir-33-1b fru-mir-33b fru-mir-33-1a		3' GUUACGUUGAUGUUACGUGGU 5' fru-mir-33-1b __ ..||||||..||:|||||||| __ 5' ACAUGCAA--ACGAUGCACCA 3' ENSDART00000024817_P E:-24.459999 S:124.000000 Loc:552 Cons: 73.68%(fru)
fru-mir-33b	ENSDART00000024817_P	ENSDARG00000006528	SINFRUG00000144633		ENSDARG00000006528 4001 (4001 nt) [JUNCTIONAL ADHESION MOLECULE 2 PRECURSOR VASCULAR ENDOTHELIAL JUNCTION ASSOCIATED MOLECULE VE JAM;] [Immunoglobulin-like:Immunoglobulin-like;]	1	24.46	124	SINFRUG00000144633 (fru-miR-33b)		fru-mir-33-1b fru-mir-33b fru-mir-33-1a		3' GUUACGUUGAUGUUACGUGGU 5' fru-mir-33b __ ..||||||..||:|||||||| __ 5' ACAUGCAA--ACGAUGCACCA 3' ENSDART00000024817_P E:-24.459999 S:124.000000 Loc:552 Cons: 73.68%(fru)
fru-mir-33-1a	ENSDART00000024817_P	ENSDARG00000006528	SINFRUG00000144633		ENSDARG00000006528 4001 (4001 nt) [JUNCTIONAL ADHESION MOLECULE 2 PRECURSOR VASCULAR ENDOTHELIAL JUNCTION ASSOCIATED MOLECULE VE JAM;] [Immunoglobulin-like:Immunoglobulin-like;]	1	24.46	124	SINFRUG00000144633 (fru-miR-33-1a)		fru-mir-33-1b fru-mir-33b fru-mir-33-1a		3' GUUACGUUGAUGUUACGUGGU 5' fru-mir-33-1a __ ..||||||..||:|||||||| __ 5' ACAUGCAA--ACGAUGCACCA 3' ENSDART00000024817_P E:-24.459999 S:124.000000 Loc:552 Cons: 73.68%(fru)
dre-mir-199-1a	ENSDART00000015385_P	ENSDARG00000011947	SINFRUG00000133013		ENSDARG00000011947 4001 (4001 nt) [MYOTUBULARIN; MYOTUBULARIN;] [GRAM domain:GRAM domain; GRAM domain:GRAM domain;]	1	23.28	124	SINFRUG00000133013 (fru-miR-199-1a)		dre-mir-199-1a dre-mir-199-1c dre-mir-199-1b		3' CUUGUCCAUCAGACUUGUGACCC 5' dre-mir-199-1a __ |||..|.||.|:||||||:|||| __ 5' GAAACGAUA-UUUGAACAUUGGG 3' ENSDART00000015385_P E:-23.280001 S:124.000000 Loc:1530 Cons: 72.73%(fru)
dre-mir-199-1c	ENSDART00000015385_P	ENSDARG00000011947	SINFRUG00000133013		ENSDARG00000011947 4001 (4001 nt) [MYOTUBULARIN; MYOTUBULARIN;] [GRAM domain:GRAM domain; GRAM domain:GRAM domain;]	1	23.28	124	SINFRUG00000133013 (dre-miR-199-1c)		dre-mir-199-1a dre-mir-199-1c dre-mir-199-1b		3' CUUGUCCAUCAGACUUGUGACCC 5' dre-mir-199-1c __ |||..|.||.|:||||||:|||| __ 5' GAAACGAUA-UUUGAACAUUGGG 3' ENSDART00000015385_P E:-23.280001 S:124.000000 Loc:1530 Cons: 72.73%(fru)
dre-mir-199-1b	ENSDART00000015385_P	ENSDARG00000011947	SINFRUG00000133013		ENSDARG00000011947 4001 (4001 nt) [MYOTUBULARIN; MYOTUBULARIN;] [GRAM domain:GRAM domain; GRAM domain:GRAM domain;]	1	23.28	124	SINFRUG00000133013 (fru-miR-199-1b)		dre-mir-199-1a dre-mir-199-1c dre-mir-199-1b		3' CUUGUCCAUCAGACUUGUGACCC 5' dre-mir-199-1b __ |||..|.||.|:||||||:|||| __ 5' GAAACGAUA-UUUGAACAUUGGG 3' ENSDART00000015385_P E:-23.280001 S:124.000000 Loc:1530 Cons: 72.73%(fru)
dre-mir-20-2b	ENSDART00000011596_P	ENSDARG00000017115	SINFRUG00000145964		ENSDARG00000017115 4001 (4001 nt) [TUMOR NECROSIS FACTOR ALPHA INDUCED 1 ENDOTHELIAL B12;] [K+ channel tetramerisation:K+ channel tetramerisation;]	1	22.57	124	SINFRUG00000145964 (dre-miR-20-2b)		dre-mir-20-2b dre-mir-20-2a		3' GAUGGAC-GUGA--CACUCGUGAAAC 5' dre-mir-20-2b __ ||:|.||.||:|...||||||:|||| __ 5' CUGCAUGACAUUCCCUGAGCAUUUUG 3' ENSDART00000011596_P E:-22.57 S:124.000000 Loc:288 Cons: 73.08%(fru)
dre-mir-20-2a	ENSDART00000011596_P	ENSDARG00000017115	SINFRUG00000145964		ENSDARG00000017115 4001 (4001 nt) [TUMOR NECROSIS FACTOR ALPHA INDUCED 1 ENDOTHELIAL B12;] [K+ channel tetramerisation:K+ channel tetramerisation;]	1	22.57	124	SINFRUG00000145964 (dre-miR-20-2a)		dre-mir-20-2b dre-mir-20-2a		3' GAUGGAC-GUGA--CACUCGUGAAAC 5' dre-mir-20-2a __ ||:|.||.||:|...||||||:|||| __ 5' CUGCAUGACAUUCCCUGAGCAUUUUG 3' ENSDART00000011596_P E:-22.57 S:124.000000 Loc:288 Cons: 73.08%(fru)
dre-mir-31-2a	ENSDART00000023566_P	ENSDARG00000019023	SINFRUG00000139679		ENSDARG00000019023 4001 (4001 nt) [AMBIGUOUS;] [2OG-Fe(II) oxygenase superfamily:2OG-Fe(II) oxygenase superfamily;]	1	27.47	124	SINFRUG00000139679 (dre-miR-31-2a)		dre-mir-187 dre-mir-31-2a		3' GACGAUACGGAGGUAUAACGGU 5' dre-mir-31-2a __ :|||.|||||.||:|.|||||| __ 5' UUGCCAUGCCACCGUUUUGCCA 3' ENSDART00000023566_P E:-27.469999 S:124.000000 Loc:1178 Cons: 77.27%(fru)
dre-mir-17-1c	ENSDART00000022956_P	ENSDARG00000018859	SINFRUG00000129315		ENSDARG00000018859 4001 (4001 nt) [POTASSIUM VOLTAGE GATED CHANNEL SUBFAMILY MEMBER POTASSIUM CHANNEL;] [Voltage-dependent potassium channel:Voltage-dependent potassium channel; Shaker voltage-gated K+ channel:Shaker voltage-gated K+ channel; Kv channel:Kv channel; Kv1.4 voltage-gated K+ channel:Kv1.4 voltage-gated K+ channel; Ion transport protein:Ion transport protein; K+ channel tetramerisatio…	1	22.25	124	SINFRUG00000129315 (fru-miR-17-1c)		dre-mir-17-1c dre-mir-17-1a dre-mir-20-2a dre-mir-20-2b fru-mir-93-2b		3' UGAUGGACGUGAUAUUCGUGAAAU 5' dre-mir-17-1c __ :..||:||||...||:|||||||| __ 5' GGAACUUGCA---UAGGCACUUUA 3' ENSDART00000022956_P E:-22.25 S:124.000000 Loc:322 Cons: 71.43%(fru)
dre-mir-24-1	ENSDART00000018663_P	ENSDARG00000019819	SINFRUG00000122374		ENSDARG00000019819 4001 (4001 nt) [ALPHA ADRENERGIC RECEPTOR ALPHA ADRENOCEPTOR; ALPHA ADRENERGIC RECEPTOR ALPHA ADRENOCEPTOR;] [Rhodopsin-like GPCR superfamily:Rhodopsin-like GPCR superfamily; Adrenergic receptor, alpha-2A:Adrenergic receptor, alpha-2A; Adrenergic receptor:Adrenergic receptor; Adrenergic receptor, alpha-2B:Adrenergic receptor, alpha-2B; Rhodopsin-like GPCR superfamily:Rhodopsin-…	1	27.51	124	SINFRUG00000122374 (fru-miR-24-1)		dre-mir-24-1 fru-mir-24-3		3' GACAAGGACGACUUGACUCGGU 5' dre-mir-24-1 __ :||||:|...||||:||||||| __ 5' UUGUUUC-AAUGAAUUGAGCCA 3' ENSDART00000018663_P E:-27.51 S:124.000000 Loc:2605 Cons: 71.43%(fru)
dre-mir-19-1a	ENSDART00000008817_P	ENSDARG00000004614	SINFRUG00000133518		ENSDARG00000004614 4001 (4001 nt) [CHROMODOMAIN HELICASE DNA BINDING; CHROMODOMAIN HELICASE DNA BINDING; CHROMODOMAIN HELICASE DNA BINDING; CHROMODOMAIN HELICASE DNA BINDING; CHROMODOMAIN HELICASE DNA BINDING;] [Helicase, C-terminal:Helicase, C-terminal; SNF2 related domain:SNF2 related domain; Helicase, C-terminal:Helicase, C-terminal; Chromo domain:Chromo domain; Zn-finger-like, PHD finger:Zn-f…	1	26.66	124	SINFRUG00000133518 (fru-miR-19-1a)		dre-mir-19-1a dre-mir-19-1c		3' AGUCAAAACGUAUCUAAACGUGU 5' dre-mir-19-1a __ |||||.||||||.|:||||||:| __ 5' UCAGUCUUGCAU-GGUUUGCAUA 3' ENSDART00000008817_P E:-26.66 S:124.000000 Loc:1938 Cons: 72.73%(fru)
dre-mir-19-1c	ENSDART00000008817_P	ENSDARG00000004614	SINFRUG00000133518		ENSDARG00000004614 4001 (4001 nt) [CHROMODOMAIN HELICASE DNA BINDING; CHROMODOMAIN HELICASE DNA BINDING; CHROMODOMAIN HELICASE DNA BINDING; CHROMODOMAIN HELICASE DNA BINDING; CHROMODOMAIN HELICASE DNA BINDING;] [Helicase, C-terminal:Helicase, C-terminal; SNF2 related domain:SNF2 related domain; Helicase, C-terminal:Helicase, C-terminal; Chromo domain:Chromo domain; Zn-finger-like, PHD finger:Zn-f…	1	26.66	124	SINFRUG00000133518 (fru-miR-19-1c)		dre-mir-19-1a dre-mir-19-1c		3' AGUCAAAACGUAUCUAAACGUGU 5' dre-mir-19-1c __ |||||.||||||.|:||||||:| __ 5' UCAGUCUUGCAU-GGUUUGCAUA 3' ENSDART00000008817_P E:-26.66 S:124.000000 Loc:1938 Cons: 72.73%(fru)
dre-mir-200a-1a	ENSDART00000012058_P	ENSDARG00000021361	SINFRUG00000144120		ENSDARG00000021361 4001 (4001 nt) [UNKNOWN;] []	1	17.88	124	SINFRUG00000144120 (fru-miR-200a-1a)		dre-mir-194-2 dre-mir-200a-1a dre-mir-34-3b		3' UUUGUAGCAAUGGUCUGUCACAAUCUU 5' dre-mir-200a-1a __ |:|:||.|.||.::|.:||||||||:| __ 5' AGAUAU-GAUA-UGGUUAGUGUUAGGA 3' ENSDART00000012058_P E:-17.879999 S:124.000000 Loc:465 Cons: 72.00%(fru)
dre-mir-1-1a	ENSDART00000006471_P	ENSDARG00000013921	SINFRUG00000130901		ENSDARG00000013921 4001 (4001 nt) [UNKNOWN; UNKNOWN; UNKNOWN;] []	1	21.75	124	SINFRUG00000143215 (fru-miR-1-1a)		dre-mir-1-1a dre-mir-1 fru-mir-18-3		3' UAUGUAUGAAGAAAUGUAAGGU 5' dre-mir-1-1a __ :.||||:|...||||||||||| __ 5' GAACAUGC--AUUUACAUUCCA 3' ENSDART00000006471_P E:-21.75 S:124.000000 Loc:942 Cons: 75.00%(fru)
dre-mir-1	ENSDART00000006471_P	ENSDARG00000013921	SINFRUG00000130901		ENSDARG00000013921 4001 (4001 nt) [UNKNOWN; UNKNOWN; UNKNOWN;] []	1	21.75	124	SINFRUG00000143215 (fru-miR-1)		dre-mir-1-1a dre-mir-1 fru-mir-18-3		3' UAUGUAUGAAGAAAUGUAAGGU 5' dre-mir-1 __ :.||||:|...||||||||||| __ 5' GAACAUGC--AUUUACAUUCCA 3' ENSDART00000006471_P E:-21.75 S:124.000000 Loc:942 Cons: 75.00%(fru)
dre-mir-24-1	ENSDART00000024663_P	ENSDARG00000011918	SINFRUG00000122187		ENSDARG00000011918 4001 (4001 nt) [MYOSIN IXB UNCONVENTIONAL MYOSIN 9B; MYOSIN IXB UNCONVENTIONAL MYOSIN 9B;] [Myosin head (motor domain):Myosin head (motor domain); IQ calmodulin-binding region:IQ calmodulin-binding region; RhoGAP domain:RhoGAP domain; RhoGAP domain:RhoGAP domain;]	1	23.54	124	SINFRUG00000122187 (fru-miR-24-1)		dre-mir-24-1		3' GACAAGGACGACUUGACUCGGU 5' dre-mir-24-1 __ .||||..|.|.||||||||||| __ 5' AUGUU--UACAGAACUGAGCCA 3' ENSDART00000024663_P E:-23.540001 S:124.000000 Loc:1538 Cons: 70.00%(fru)
dre-mir-103-3b	ENSDART00000022533_P	ENSDARG00000019418	SINFRUG00000129831		ENSDARG00000019418 4001 (4001 nt) [INWARD RECTIFIER POTASSIUM CHANNEL POTASSIUM CHANNEL INWARDLY RECTIFYING SUBFAMILY J MEMBER INWARD RECTIFIER K+ CHANNEL;] [K+ channel, inward rectifier:K+ channel, inward rectifier; Kir2.1 inward rectifier K+ channel:Kir2.1 inward rectifier K+ channel; Kir1.1 inward rectifier K+ channel:Kir1.1 inward rectifier K+ channel; Kir3.1 inward rectifier K+ channel:Kir3.…	1	22.43	124	SINFRUG00000129831 (dre-miR-103-3b)		dre-mir-103-3b dre-mir-107-2 dre-mir-16-2		3' ACUUUC-GGGACAUGUU-ACGACGA 5' dre-mir-103-3b __ ||||.|.|::|.|||||.||||||| __ 5' UGAAUGUCUUUCUACAAGUGCUGCU 3' ENSDART00000022533_P E:-22.43 S:124.000000 Loc:1482 Cons: 72.00%(fru)
dre-mir-107-2	ENSDART00000022533_P	ENSDARG00000019418	SINFRUG00000129831		ENSDARG00000019418 4001 (4001 nt) [INWARD RECTIFIER POTASSIUM CHANNEL POTASSIUM CHANNEL INWARDLY RECTIFYING SUBFAMILY J MEMBER INWARD RECTIFIER K+ CHANNEL;] [K+ channel, inward rectifier:K+ channel, inward rectifier; Kir2.1 inward rectifier K+ channel:Kir2.1 inward rectifier K+ channel; Kir1.1 inward rectifier K+ channel:Kir1.1 inward rectifier K+ channel; Kir3.1 inward rectifier K+ channel:Kir3.…	1	22.43	124	SINFRUG00000129831 (dre-miR-107-2)		dre-mir-103-3b dre-mir-107-2 dre-mir-16-2		3' ACUUUC-GGGACAUGUU-ACGACGA 5' dre-mir-107-2 __ ||||.|.|::|.|||||.||||||| __ 5' UGAAUGUCUUUCUACAAGUGCUGCU 3' ENSDART00000022533_P E:-22.43 S:124.000000 Loc:1482 Cons: 72.00%(fru)
fru-mir-152-1a	ENSDART00000026885_P	ENSDARG00000016251	SINFRUG00000136178		ENSDARG00000016251 4001 (4001 nt) [POLYHOMEOTIC 1 EARLY DEVELOPMENT REGULATOR 1;] [Sterile alpha motif SAM:Sterile alpha motif SAM;]	1	25.26	124	SINFRUG00000136177 (fru-miR-152-1a)		fru-mir-152-1a dre-mir-152		3' GUUUCAAGAC---AAUACGUGACU 5' fru-mir-152-1a __ |.||||||||...||:|||||||. __ 5' CUAAGUUCUGACCUUGUGCACUGU 3' ENSDART00000026885_P E:-25.26 S:124.000000 Loc:172 Cons: 70.83%(fru)
dre-mir-10-1b	ENSDART00000012818_P	ENSDARG00000009222	SINFRUG00000134094		ENSDARG00000009222 4001 (4001 nt) [UNKNOWN;] []	1	20.98	124	SINFRUG00000134094 (dre-miR-10-1b)		dre-mir-10-1b dre-mir-199-as		3' GUGUU-UAAGCCUAGAUGUCCCAU 5' dre-mir-10-1b __ .||||.|||.||:|:|||||.||| __ 5' GACAACAUUAGGGUUUACAGUGUA 3' ENSDART00000012818_P E:-20.98 S:124.000000 Loc:1496 Cons: 70.83%(fru)
dre-mir-144	ENSDART00000019184_P	ENSDARG00000015407	SINFRUG00000154578		ENSDARG00000015407 4001 (4001 nt) [LEUCINE RICH REPEAT TRANSMEMBRANE PRECURSOR FIBRONECTIN DOMAIN CONTAINING LEUCINE RICH TRANSMEMBRANE;] [Fibronectin, type III:Fibronectin, type III; Leucine-rich repeat:Leucine-rich repeat; Cysteine-rich flanking region, N-terminal:Cysteine-rich flanking region, N-terminal; Cysteine-rich flanking region, C-terminal:Cysteine-rich flanking region, C-terminal;]	1	21.58	124	SINFRUG00000154578 (fru-miR-144)		dre-mir-106-a1 dre-mir-124-1b dre-mir-124-1a dre-mir-124-1c dre-mir-124-1d dre-mir-124-1e dre-mir-130-1a dre-mir-130-1c dre-mir-130-2a dre-mir-144 dre-mir-17-1a fru-mir-18-3 fru-mir-182-1 dre-mir-182 fru-mir-182-2 dre-mir-24-1 dre-mir-27-3a dre-mir-27-2a dre-mir-34-3b fru-mir-93-2b		3' UAUCAUGUAGUAGAUAUGACAU 5' dre-mir-144 __ .|.|||.:||||:|:||||||| __ 5' UUUGUA-GUCAUUUGUACUGUA 3' ENSDART00000019184_P E:-21.58 S:124.000000 Loc:235 Cons: 95.24%(fru)
dre-mir-138-2	ENSDART00000026205_P	ENSDARG00000004302	SINFRUG00000138948		ENSDARG00000004302 4001 (4001 nt) [MEMBRANE ASSOCIATED TRANSPORTER AIM 1 MELANOMA ANTIGEN AIM1; DNB 5; DNB 5; DNB 5;] []	1	29.74	124	SINFRUG00000138948 (dre-miR-138-2)		dre-mir-138-2 dre-mir-145		3' GGGACUAAGUGUUGUGGUCGA 5' dre-mir-138-2 __ .|||||||:|:|.||:||||| __ 5' ACCUGAUUUAUAUCAUCAGCU 3' ENSDART00000026205_P E:-29.74 S:124.000000 Loc:831 Cons: 71.43%(fru)
dre-mir-200a-1a	ENSDART00000013507_P	ENSDARG00000013968	SINFRUG00000120845		PROSAPOSIN. [Source:RefSeq;Acc:NM_131883] ENSDARG00000013968 (-1) (196573 196573 212975 212975 136531) 4001 (4001 nt) [SAPOSIN C CO BETA GLUCOSIDASE GLUCOSYLCERAMIDASE ACTIVATOR SPHINGOLIPID ACTIVATOR 2 SAP 2;] [Saposin type A:Saposin type A; Saposin-like type B, 2:Saposin-like type B, 2; Saposin-like type B, 1:Saposin-like type B, 1;]	1	19.27	124	SINFRUG00000120845 (fru-miR-200a-1a)		dre-mir-200a-1a dre-mir-27-3a		3' UUUGUAGCAAUGGUCUGUCACAAUCUU 5' dre-mir-200a-1a __ ||||||..|||.:|.||||||||:|.| __ 5' AAACAU--UUA-UAUACAGUGUUGGUA 3' ENSDART00000013507_P E:-19.27 S:124.000000 Loc:1327 Cons: 70.83%(fru)
dre-mir-130-1b	ENSDART00000014929_P	ENSDARG00000005313	SINFRUG00000148199		HOMEO BOX (H6 FAMILY) 3. [Source:RefSeq;Acc:NM_131634] ENSDARG00000005313 (-1) (88190 88190 89530 89530 73450) 4001 (4001 nt) [HOMEOBOX HMX3 HOMEOBOX NKX 5 1;] [Homeobox:Homeobox; Helix-turn-helix motif, lambda-like repressor:Helix-turn-helix motif, lambda-like repressor;]	1	22.5	124	SINFRUG00000148199 (dre-miR-130-1b)		dre-mir-130-1c dre-mir-130-1b dre-mir-130-1a	GO:0003700->transcription factor activity GO:0005634->nucleus GO:0005634->nucleus GO:0003677->DNA binding GO:0006355->regulation of transcription, DNA-dependent	3' UACGGGAAAAUUGUAACGUGAC 5' dre-mir-130-1b __ ...:|:||||.||||||:|:|| __ 5' CGUUCUUUUUUACAUUGUAUUG 3' ENSDART00000014929_P E:-22.5 S:124.000000 Loc:842 Cons: 72.73%(fru)
dre-mir-34-3a	ENSDART00000028094_P	ENSDARG00000002140	SINFRUG00000148198		ENSDARG00000002140 4001 (4001 nt) [ZINC FINGER TRANSCRIPTION FACTOR PEGASUS;] [Zn-finger, C2H2 type:Zn-finger, C2H2 type;]	1	23.55	124	SINFRUG00000148198 (dre-miR-34-3a)		fru-mir-132a fru-mir-132b dre-mir-132 dre-mir-143-1a dre-mir-27-1a dre-mir-34-3a dre-mir-34-2b		3' UGUUAGUCGAUUGUUGUGACGGA 5' dre-mir-34-3a __ |||||||..|..|||||||||:| __ 5' ACAAUCA--U--CAACACUGCUU 3' ENSDART00000028094_P E:-23.549999 S:124.000000 Loc:2749 Cons: 78.95%(fru)
dre-mir-34-2b	ENSDART00000028094_P	ENSDARG00000002140	SINFRUG00000148198		ENSDARG00000002140 4001 (4001 nt) [ZINC FINGER TRANSCRIPTION FACTOR PEGASUS;] [Zn-finger, C2H2 type:Zn-finger, C2H2 type;]	1	23.55	124	SINFRUG00000148198 (dre-miR-34-2b)		fru-mir-132a fru-mir-132b dre-mir-132 dre-mir-143-1a dre-mir-27-1a dre-mir-34-3a dre-mir-34-2b		3' UGUUAGUCGAUUGUUGUGACGGA 5' dre-mir-34-2b __ |||||||..|..|||||||||:| __ 5' ACAAUCA--U--CAACACUGCUU 3' ENSDART00000028094_P E:-23.549999 S:124.000000 Loc:2749 Cons: 78.95%(fru)
fru-mir-183-2	ENSDART00000008286	ENSDARG00000005066	SINFRUG00000128708		ENSDARG00000005066 467 (467 nt) [INHIBITOR; INHIBITOR; INHIBITOR; INHIBITOR; INHIBITOR; INHIBITOR;] [Laminin-type EGF-like domain:Laminin-type EGF-like domain; EGF-like domain:EGF-like domain; Serine protease inhibitor, Kazal type:Serine protease inhibitor, Kazal type; Laminin G:Laminin G; EGF-like domain:EGF-like domain; Laminin G:Laminin G; Laminin G:Laminin G; EGF-like domain:EGF-like domain; …	1	20.66	124	SINFRUG00000128708 (fru-miR-183-2)		fru-mir-183-2 dre-mir-183 fru-mir-183-1		3' GUCACUUAAGAUGGUCACGGUAU 5' fru-mir-183-2 __ .|.||..||:|.:|||||||||| __ 5' GAUUGCCUUUUCUCAGUGCCAUA 3' ENSDART00000008286 E:-20.66 S:124.000000 Loc:312 Cons: 73.91%(fru)
dre-mir-183	ENSDART00000008286	ENSDARG00000005066	SINFRUG00000128708		ENSDARG00000005066 467 (467 nt) [INHIBITOR; INHIBITOR; INHIBITOR; INHIBITOR; INHIBITOR; INHIBITOR;] [Laminin-type EGF-like domain:Laminin-type EGF-like domain; EGF-like domain:EGF-like domain; Serine protease inhibitor, Kazal type:Serine protease inhibitor, Kazal type; Laminin G:Laminin G; EGF-like domain:EGF-like domain; Laminin G:Laminin G; Laminin G:Laminin G; EGF-like domain:EGF-like domain; …	1	20.66	124	SINFRUG00000128708 (dre-miR-183)		fru-mir-183-2 dre-mir-183 fru-mir-183-1		3' GUCACUUAAGAUGGUCACGGUAU 5' dre-mir-183 __ .|.||..||:|.:|||||||||| __ 5' GAUUGCCUUUUCUCAGUGCCAUA 3' ENSDART00000008286 E:-20.66 S:124.000000 Loc:312 Cons: 73.91%(fru)
fru-mir-183-1	ENSDART00000008286	ENSDARG00000005066	SINFRUG00000128708		ENSDARG00000005066 467 (467 nt) [INHIBITOR; INHIBITOR; INHIBITOR; INHIBITOR; INHIBITOR; INHIBITOR;] [Laminin-type EGF-like domain:Laminin-type EGF-like domain; EGF-like domain:EGF-like domain; Serine protease inhibitor, Kazal type:Serine protease inhibitor, Kazal type; Laminin G:Laminin G; EGF-like domain:EGF-like domain; Laminin G:Laminin G; Laminin G:Laminin G; EGF-like domain:EGF-like domain; …	1	20.66	124	SINFRUG00000128708 (fru-miR-183-1)		fru-mir-183-2 dre-mir-183 fru-mir-183-1		3' GUCACUUAAGAUGGUCACGGUAU 5' fru-mir-183-1 __ .|.||..||:|.:|||||||||| __ 5' GAUUGCCUUUUCUCAGUGCCAUA 3' ENSDART00000008286 E:-20.66 S:124.000000 Loc:312 Cons: 73.91%(fru)
fru-mir-135-1b	ENSDART00000023734_P	ENSDARG00000016436	SINFRUG00000125761		ENSDARG00000016436 4001 (4001 nt) [ECTO ADP RIBOSYLTRANSFERASE PRECURSOR EC_2.4.2.31 NAD P + ARGININE ADP RIBOSYLTRANSFERASE MONO ADP RIBOSYL TRANSFERASE;] [NAD:arginine ADP-ribosyltransferase, ART:NAD:arginine ADP-ribosyltransferase, ART;]	1	17.94	124	SINFRUG00000125761 (fru-miR-135-1b)		fru-mir-135-1b		3' AGUGCAUCCUUAUUUUUCGGUAU 5' fru-mir-135-1b __ |::||||.||||||||||.:||| __ 5' UUGCGUAUGAAUAAAAAG-UAUA 3' ENSDART00000023734_P E:-17.940001 S:124.000000 Loc:1880 Cons: 77.27%(fru)
dre-mir-18-2b	ENSDART00000022758_P	ENSDARG00000016513	SINFRUG00000143310		ENSDARG00000016513 4001 (4001 nt) [AMBIGUOUS;] [Nuclear protein SET:Nuclear protein SET;]	1	17.72	124	SINFRUG00000143310 (dre-miR-18-2b)		dre-mir-18-2b dre-mir-18-2		3' AUAGACGUGAUUUACGUGGAAU 5' dre-mir-18-2b __ |.|:|.:|:||||||||.|||| __ 5' UUUUUUUAUUAAAUGCAGCUUA 3' ENSDART00000022758_P E:-17.719999 S:124.000000 Loc:220 Cons: 72.73%(fru)
dre-mir-18-2	ENSDART00000022758_P	ENSDARG00000016513	SINFRUG00000143310		ENSDARG00000016513 4001 (4001 nt) [AMBIGUOUS;] [Nuclear protein SET:Nuclear protein SET;]	1	17.72	124	SINFRUG00000143310 (dre-miR-18-2)		dre-mir-18-2b dre-mir-18-2		3' AUAGACGUGAUUUACGUGGAAU 5' dre-mir-18-2 __ |.|:|.:|:||||||||.|||| __ 5' UUUUUUUAUUAAAUGCAGCUUA 3' ENSDART00000022758_P E:-17.719999 S:124.000000 Loc:220 Cons: 72.73%(fru)
dre-mir-27-1a	ENSDART00000018857_P	ENSDARG00000002023	SINFRUG00000152685		ENSDARG00000002023 3815 (3815 nt) [AMBIGUOUS;] []	1	35.61	124	SINFRUG00000152685 (fru-miR-27-1a)		dre-mir-130-1b dre-mir-193-1a dre-mir-193-1c dre-mir-27-2a dre-mir-27-1a dre-mir-27-3a		3' CGCCUUGA-AUCGGUGACACUU 5' dre-mir-27-1a __ .||||:||..||||:||||||: __ 5' ACGGAGCUGCAGCCGCUGUGAG 3' ENSDART00000018857_P E:-35.610001 S:124.000000 Loc:188 Cons: 77.27%(fru)
dre-mir-144	ENSDART00000006926_P	ENSDARG00000014906	SINFRUG00000143354		MAB-21-LIKE 1. [Source:RefSeq;Acc:NM_152974] ENSDARG00000014906 (-1) (265839 265839 266921 266921 177993) 4001 (4001 nt) [UNKNOWN;] [Mab-21 protein:Mab-21 protein;]	1	18.91	124	SINFRUG00000143354 (fru-miR-144)		fru-mir-142-1b-as dre-mir-144 fru-mir-205-1a dre-mir-205		3' UAUCAUGUAGUAGAUAUGACAU 5' dre-mir-144 __ ...||||||..|:||||||||| __ 5' CCUGUACAU--UUUAUACUGUA 3' ENSDART00000006926_P E:-18.91 S:124.000000 Loc:328 Cons: 95.00%(fru)
dre-mir-15-1a	ENSDART00000024463_P	ENSDARG00000008262	SINFRUG00000150171		ENSDARG00000008262 4001 (4001 nt) [PROBABLE GLUCOSAMINE 6 PHOSPHATE N ACETYLTRANSFERASE EC_2.3.1.4 PHOSPHOGLUCOSAMINE TRANSACETYLASE PHOSPHOGLUCOSAMINE ACETYLASE;] [GCN5-related N-acetyltransferase:GCN5-related N-acetyltransferase;]	1	28.17	124	SINFRUG00000150171 (fru-miR-15-1a)		dre-mir-15-1a		3' GUGUUUGGUAAGACACGACGAU 5' dre-mir-15-1a __ ..|.|.||:||:|||||||||: __ 5' GCCUAUCCGUUUUGUGCUGCUG 3' ENSDART00000024463_P E:-28.17 S:124.000000 Loc:1439 Cons: 77.27%(fru)
dre-mir-98-1a	ENSDART00000020328_P	ENSDARG00000006518	SINFRUG00000148203		ENSDARG00000006518 4001 (4001 nt) [AMBIGUOUS; AMBIGUOUS;] [Pleckstrin-like:Pleckstrin-like; Pleckstrin-like:Pleckstrin-like;]	1	23.98	123	SINFRUG00000148203 (fru-miR-98-1a)		fru-mir-152-1b dre-mir-98-1a		3' UUGUUGUGUUGAAUGAUGGAGU 5' dre-mir-98-1a __ ||||:.|||:|||:||:|.||| __ 5' AACAGAACAGCUUGCUGCAUCA 3' ENSDART00000020328_P E:-23.98 S:123.000000 Loc:60 Cons: 72.73%(fru)
dre-mir-181-1c	ENSDART00000003539_P	ENSDARG00000009187	SINFRUG00000132168		ENSDARG00000009187 4001 (4001 nt) [RETINOBLASTOMA BINDING 1 RBBP 1; RETINOBLASTOMA BINDING 1 RBBP 1;] [ARID (AT-rich interaction domain) protein:ARID (AT-rich interaction domain) protein;]	1	22.64	123	SINFRUG00000132168 (fru-miR-181-1c)		dre-mir-181-1c dre-mir-181-1d dre-mir-181-1a dre-mir-181-1b		3' UGAGUGGCUGUCGCAACUUACAA 5' dre-mir-181-1c __ |||...:|||:.:|||||||||| __ 5' ACU---UGACGCUGUUGAAUGUU 3' ENSDART00000003539_P E:-22.639999 S:123.000000 Loc:1496 Cons: 75.00%(fru)
dre-mir-181-1d	ENSDART00000003539_P	ENSDARG00000009187	SINFRUG00000132168		ENSDARG00000009187 4001 (4001 nt) [RETINOBLASTOMA BINDING 1 RBBP 1; RETINOBLASTOMA BINDING 1 RBBP 1;] [ARID (AT-rich interaction domain) protein:ARID (AT-rich interaction domain) protein;]	1	22.64	123	SINFRUG00000132168 (fru-miR-181-1d)		dre-mir-181-1c dre-mir-181-1d dre-mir-181-1a dre-mir-181-1b		3' UGAGUGGCUGUCGCAACUUACAA 5' dre-mir-181-1d __ |||...:|||:.:|||||||||| __ 5' ACU---UGACGCUGUUGAAUGUU 3' ENSDART00000003539_P E:-22.639999 S:123.000000 Loc:1496 Cons: 75.00%(fru)
dre-mir-181-1a	ENSDART00000003539_P	ENSDARG00000009187	SINFRUG00000132168		ENSDARG00000009187 4001 (4001 nt) [RETINOBLASTOMA BINDING 1 RBBP 1; RETINOBLASTOMA BINDING 1 RBBP 1;] [ARID (AT-rich interaction domain) protein:ARID (AT-rich interaction domain) protein;]	1	22.64	123	SINFRUG00000132168 (fru-miR-181-1a)		dre-mir-181-1c dre-mir-181-1d dre-mir-181-1a dre-mir-181-1b		3' UGAGUGGCUGUCGCAACUUACAA 5' dre-mir-181-1a __ |||...:|||:.:|||||||||| __ 5' ACU---UGACGCUGUUGAAUGUU 3' ENSDART00000003539_P E:-22.639999 S:123.000000 Loc:1496 Cons: 75.00%(fru)
dre-mir-181-1b	ENSDART00000003539_P	ENSDARG00000009187	SINFRUG00000132168		ENSDARG00000009187 4001 (4001 nt) [RETINOBLASTOMA BINDING 1 RBBP 1; RETINOBLASTOMA BINDING 1 RBBP 1;] [ARID (AT-rich interaction domain) protein:ARID (AT-rich interaction domain) protein;]	1	22.64	123	SINFRUG00000132168 (fru-miR-181-1b)		dre-mir-181-1c dre-mir-181-1d dre-mir-181-1a dre-mir-181-1b		3' UGAGUGGCUGUCGCAACUUACAA 5' dre-mir-181-1b __ |||...:|||:.:|||||||||| __ 5' ACU---UGACGCUGUUGAAUGUU 3' ENSDART00000003539_P E:-22.639999 S:123.000000 Loc:1496 Cons: 75.00%(fru)
dre-mir-17-1d	ENSDART00000015954_P	ENSDARG00000003046	SINFRUG00000130587		ENSDARG00000003046 4001 (4001 nt) [VINEXIN SH3 CONTAINING MOLECULE 1 SCAM 1; VINEXIN SH3 CONTAINING MOLECULE 1 SCAM 1; VINEXIN SH3 CONTAINING MOLECULE 1 SCAM 1; VINEXIN SH3 CONTAINING MOLECULE 1 SCAM 1;] [SH3 domain:SH3 domain; Neutrophil cytosol factor 2:Neutrophil cytosol factor 2; Sorbin-like:Sorbin-like; Neutrophil cytosol factor 2:Neutrophil cytosol factor 2; SH3 domain:SH3 domain; Proline-r…	1	22.36	123	SINFRUG00000130587 (fru-miR-17-1d)		dre-mir-106-b1 fru-mir-106-b2 dre-mir-17-1d fru-mir-17-1e dre-mir-17-1b dre-mir-20-2b dre-mir-20-1 dre-mir-20-2a dre-mir-20-1b fru-mir-30c fru-mir-93-2a		3' UGAUGGACGUGACACUCGUGAAAC 5' dre-mir-17-1d __ ::|||:|.|||..||||||||||. __ 5' GUUACUU-CAC--UGAGCACUUUU 3' ENSDART00000015954_P E:-22.360001 S:123.000000 Loc:160 Cons: 85.71%(fru)
fru-mir-183-3	ENSDART00000026987_P	ENSDARG00000018236	SINFRUG00000152504		ENSDARG00000018236 4001 (4001 nt) [INSULIN RECEPTOR SUBSTRATE;] [Insulin receptor substrate-1, PTB:Insulin receptor substrate-1, PTB; Pleckstrin-like:Pleckstrin-like;]	1	21.56	123	SINFRUG00000152504 (fru-miR-183-3)		fru-mir-183-3 dre-mir-20-2b dre-mir-20-2a		3' GUCACUUAAUGGUAUCCCGGUAU 5' fru-mir-183-3 __ |..||:|||..:|||||||:||| __ 5' CCUUGGAUU--UAUAGGGCUAUA 3' ENSDART00000026987_P E:-21.559999 S:123.000000 Loc:1876 Cons: 71.43%(fru)
dre-mir-24-1	ENSDART00000022864_P	ENSDARG00000009264	SINFRUG00000125085		ENSDARG00000009264 4001 (4001 nt) [PRECURSOR;] [Leuserpin 2:Leuserpin 2; Serpin:Serpin; DEAD/DEAH box helicase:DEAD/DEAH box helicase; G-protein beta WD-40 repeat:G-protein beta WD-40 repeat; Ubiquitin interacting motif:Ubiquitin interacting motif;]	1	26.67	123	SINFRUG00000125083 (fru-miR-24-1)		fru-mir-17-1e-as dre-mir-24-1 fru-mir-24-3		3' GACAA-GGACGACUUGACUCGGU 5' dre-mir-24-1 __ |.|||.|||..|||||||:|||| __ 5' CAGUUGCCU--UGAACUGGGCCA 3' ENSDART00000022864_P E:-26.67 S:123.000000 Loc:470 Cons: 76.19%(fru)
dre-mir-196-1b	ENSDART00000019665_P	ENSDARG00000020974	SINFRUG00000143581		ENSDARG00000020974 4001 (4001 nt) [DNAJ HOMOLOG SUBFAMILY MEMBER;] [Heat shock protein DnaJ:Heat shock protein DnaJ; Heat shock protein DnaJ, N-terminal:Heat shock protein DnaJ, N-terminal;]	1	19.06	123	SINFRUG00000143581 (fru-miR-196-1b)		dre-mir-196-1b dre-mir-196-1a dre-mir-196-1c		3' GGUUGUUGU-A-CUUUGAUGGAU 5' dre-mir-196-1b __ :.||:|.||.|.||||||||||| __ 5' UGAAUAUCACUGGAAACUACCUA 3' ENSDART00000019665_P E:-19.059999 S:123.000000 Loc:2434 Cons: 73.91%(fru)
dre-mir-196-1c	ENSDART00000019665_P	ENSDARG00000020974	SINFRUG00000143581		ENSDARG00000020974 4001 (4001 nt) [DNAJ HOMOLOG SUBFAMILY MEMBER;] [Heat shock protein DnaJ:Heat shock protein DnaJ; Heat shock protein DnaJ, N-terminal:Heat shock protein DnaJ, N-terminal;]	1	19.06	123	SINFRUG00000143581 (dre-miR-196-1c)		dre-mir-196-1b dre-mir-196-1a dre-mir-196-1c		3' GGUUGUUGU-A-CUUUGAUGGAU 5' dre-mir-196-1c __ :.||:|.||.|.||||||||||| __ 5' UGAAUAUCACUGGAAACUACCUA 3' ENSDART00000019665_P E:-19.059999 S:123.000000 Loc:2434 Cons: 73.91%(fru)
fru-mir-93-1b	ENSDART00000010973_P	ENSDARG00000014894	SINFRUG00000150799		ENSDARG00000014894 4001 (4001 nt) [AMBIGUOUS;] [Zn-finger, RING:Zn-finger, RING;]	1	25.21	123	SINFRUG00000150799 (fru-miR-93-1b)		dre-mir-18-1 fru-mir-18-1b fru-mir-18-1a fru-mir-93-1b		3' GAUGGACGUGUUUGUCGUGAAAAC 5' fru-mir-93-1b __ :.||:||||:|||.|||||||||. __ 5' UGACUUGCAUAAA-AGCACUUUUU 3' ENSDART00000010973_P E:-25.209999 S:123.000000 Loc:116 Cons: 73.91%(fru)
dre-mir-196-1c	ENSDART00000015752_P	ENSDARG00000006820	SINFRUG00000149292		ENSDARG00000006820 4001 (4001 nt) [ZINC FINGER; ZINC FINGER; ZINC FINGER; ZINC FINGER;] []	1	23.98	123	SINFRUG00000149280 (dre-miR-196-1c)		dre-mir-130-2a dre-mir-196-1c dre-mir-196-1e dre-mir-196-1a dre-mir-196-1b		3' GGUUGUUGUA-CUUUGAUGGAU 5' dre-mir-196-1c __ |.||||:::|.|:||||||||: __ 5' CGAACAGUGUGGGAACUACCUG 3' ENSDART00000015752_P E:-23.98 S:123.000000 Loc:1352 Cons: 77.27%(fru)
dre-mir-196-1b	ENSDART00000015752_P	ENSDARG00000006820	SINFRUG00000149292		ENSDARG00000006820 4001 (4001 nt) [ZINC FINGER; ZINC FINGER; ZINC FINGER; ZINC FINGER;] []	1	23.98	123	SINFRUG00000149280 (fru-miR-196-1b)		dre-mir-130-2a dre-mir-196-1c dre-mir-196-1e dre-mir-196-1a dre-mir-196-1b		3' GGUUGUUGUA-CUUUGAUGGAU 5' dre-mir-196-1b __ |.||||:::|.|:||||||||: __ 5' CGAACAGUGUGGGAACUACCUG 3' ENSDART00000015752_P E:-23.98 S:123.000000 Loc:1352 Cons: 77.27%(fru)
fru-mir-93-1b	ENSDART00000011826_P	ENSDARG00000015410	SINFRUG00000125301		ENSDARG00000015410 4001 (4001 nt) [CARBOXYPEPTIDASE;] [Zinc carboxypeptidase A metalloprotease (M14):Zinc carboxypeptidase A metalloprotease (M14); Carboxypeptidase activation peptide:Carboxypeptidase activation peptide;]	1	21	123	SINFRUG00000125301 (fru-miR-93-1b)		dre-mir-138-2 fru-mir-93-1b		3' GAUGGACGUGUUUGUCGUGAAAAC 5' fru-mir-93-1b __ ||..:|..:||.||||||:||||| __ 5' CUUAUUAAGCAUACAGCAUUUUUG 3' ENSDART00000011826_P E:-21 S:123.000000 Loc:450 Cons: 70.83%(fru)
dre-mir-145	ENSDART00000014496	ENSDARG00000004814	SINFRUG00000139485		ENSDARG00000004814 1059 (1059 nt) [CASL INTERACTING MOLECULE NEDD9 INTERACTING WITH CALPONIN HOMOLOGY AND LIM DOMAINS;] [Aromatic-ring hydroxylase:Aromatic-ring hydroxylase; Calponin-like actin-binding:Calponin-like actin-binding;]	1	27.04	123	SINFRUG00000139485 (fru-miR-145)		dre-mir-145 dre-mir-15-3 fru-mir-183-1 fru-mir-183-2 dre-mir-183 dre-mir-34		3' UUCCCUAAGGACCCUUUUGACCUG 5' dre-mir-145 __ ||||.:||:|..||:|||||||.| __ 5' AAGGAGUUUCGUGGGAAACUGGCC 3' ENSDART00000014496 E:-27.040001 S:123.000000 Loc:78 Cons: 83.33%(fru)
dre-mir-93	ENSDART00000009754_P	ENSDARG00000020489	SINFRUG00000139401		ENSDARG00000020489 3491 (3491 nt) [CASK INTERACTING; CASK INTERACTING;] [Ankyrin:Ankyrin; SH3 domain:SH3 domain; Sterile alpha motif SAM:Sterile alpha motif SAM; Ankyrin:Ankyrin; SH3 domain:SH3 domain; Sterile alpha motif SAM:Sterile alpha motif SAM;]	1	21.44	123	SINFRUG00000139401 (dre-miR-93)		dre-mir-93		3' GAUGGACGUGUUUGUCGUGAAA 5' dre-mir-93 __ |.||:|.::||:||||||:||| __ 5' CAACUU-UGCAGACAGCAUUUU 3' ENSDART00000009754_P E:-21.440001 S:123.000000 Loc:2032 Cons: 71.43%(fru)
dre-mir-31	ENSDART00000020081_P	ENSDARG00000008736	SINFRUG00000123913		ENSDARG00000008736 4001 (4001 nt) [AMBIGUOUS; AMBIGUOUS;] [Butyrophylin-like:Butyrophylin-like; SPla/RYanodine receptor SPRY:SPla/RYanodine receptor SPRY; Zn-finger, B-box:Zn-finger, B-box; Butyrophylin-like:Butyrophylin-like; SPla/RYanodine receptor SPRY:SPla/RYanodine receptor SPRY; Zn-finger, B-box:Zn-finger, B-box;]	1	19.36	123	SINFRUG00000123913 (dre-miR-31)		dre-mir-10-1a dre-mir-25 dre-mir-31		3' GUCGAUACGGUUGUAGAACGGU 5' dre-mir-31 __ |||:.||.:|.|:||:|||||| __ 5' CAGUAAUUUCUAUAUUUUGCCA 3' ENSDART00000020081_P E:-19.360001 S:123.000000 Loc:139 Cons: 77.27%(fru)
dre-mir-172	ENSDART00000025358_P	ENSDARG00000001908	SINFRUG00000122636		ENSDARG00000001908 4001 (4001 nt) [UNKNOWN;] []	1	25.21	123	SINFRUG00000122636 (dre-miR-172)		dre-mir-139 dre-mir-16-2 dre-mir-172 dre-mir-34		3' UUGUUGGUCGAUUCUGUGACGGU 5' dre-mir-172 __ |:::||||.|.||||||:||:|| __ 5' AGUGACCA-C-AAGACAUUGUCA 3' ENSDART00000025358_P E:-25.209999 S:123.000000 Loc:2520 Cons: 71.43%(fru)
dre-mir-17-1a	ENSDART00000027612_P	ENSDARG00000005540	SINFRUG00000144889		ENSDARG00000005540 4001 (4001 nt) [RAN BINDING;] [Importin-beta, N-terminal:Importin-beta, N-terminal;]	1	22.78	123	SINFRUG00000144889 (fru-miR-17-1a)		dre-mir-129-1 dre-mir-17-1c dre-mir-17-1a		3' UGAUGGACGUGACAUUCGUGAAAC 5' dre-mir-17-1a __ :||||.|.:|.||||||||:|.|| __ 5' GCUACAUAUAGUGUAAGCAUUGUG 3' ENSDART00000027612_P E:-22.780001 S:123.000000 Loc:697 Cons: 95.83%(fru)
dre-mir-98-3a	ENSDART00000025947_P	ENSDARG00000020781	SINFRUG00000134485		ENSDARG00000020781 4001 (4001 nt) [COLLAGEN ALPHA CHAIN; COLLAGEN ALPHA CHAIN; COLLAGEN ALPHA CHAIN; COLLAGEN ALPHA CHAIN; COLLAGEN ALPHA CHAIN; COLLAGEN ALPHA CHAIN; COLLAGEN ALPHA CHAIN;] [Collagen triple helix repeat:Collagen triple helix repeat; Type 4 procollagen, C-terminal repeat:Type 4 procollagen, C-terminal repeat; Collagen triple helix repeat:Collagen triple helix repeat; Type 4 procol…	1	21.31	123	SINFRUG00000134485 (fru-miR-98-3a)		dre-mir-103-3b dre-mir-107-2 dre-mir-9a dre-mir-9b dre-mir-9e dre-mir-9c dre-mir-9f dre-mir-9d fru-mir-9g dre-mir-98-3a dre-mir-98-3b dre-mir-let7l-a dre-mir-let7l-a1 dre-mir-let7l-a2 dre-mir-let7l-b1 dre-mir-let7l-c1 fru-mir-let7l-c2 dre-mir-let7l-d1 fru-mir-let7l-d2		3' UUGGUGUGUUGGAUGAUGGAGU 5' dre-mir-98-3a __ ||::.|.:|||:||:||||||| __ 5' AAUUUC-UAACUUAUUACCUCA 3' ENSDART00000025947_P E:-21.309999 S:123.000000 Loc:232 Cons: 76.19%(fru)
dre-mir-98-3b	ENSDART00000025947_P	ENSDARG00000020781	SINFRUG00000134485		ENSDARG00000020781 4001 (4001 nt) [COLLAGEN ALPHA CHAIN; COLLAGEN ALPHA CHAIN; COLLAGEN ALPHA CHAIN; COLLAGEN ALPHA CHAIN; COLLAGEN ALPHA CHAIN; COLLAGEN ALPHA CHAIN; COLLAGEN ALPHA CHAIN;] [Collagen triple helix repeat:Collagen triple helix repeat; Type 4 procollagen, C-terminal repeat:Type 4 procollagen, C-terminal repeat; Collagen triple helix repeat:Collagen triple helix repeat; Type 4 procol…	1	21.31	123	SINFRUG00000134485 (fru-miR-98-3b)		dre-mir-103-3b dre-mir-107-2 dre-mir-9a dre-mir-9b dre-mir-9e dre-mir-9c dre-mir-9f dre-mir-9d fru-mir-9g dre-mir-98-3a dre-mir-98-3b dre-mir-let7l-a dre-mir-let7l-a1 dre-mir-let7l-a2 dre-mir-let7l-b1 dre-mir-let7l-c1 fru-mir-let7l-c2 dre-mir-let7l-d1 fru-mir-let7l-d2		3' UUGGUGUGUUGGAUGAUGGAGU 5' dre-mir-98-3b __ ||::.|.:|||:||:||||||| __ 5' AAUUUC-UAACUUAUUACCUCA 3' ENSDART00000025947_P E:-21.309999 S:123.000000 Loc:232 Cons: 76.19%(fru)
dre-mir-let7l-a1	ENSDART00000025947_P	ENSDARG00000020781	SINFRUG00000134485		ENSDARG00000020781 4001 (4001 nt) [COLLAGEN ALPHA CHAIN; COLLAGEN ALPHA CHAIN; COLLAGEN ALPHA CHAIN; COLLAGEN ALPHA CHAIN; COLLAGEN ALPHA CHAIN; COLLAGEN ALPHA CHAIN; COLLAGEN ALPHA CHAIN;] [Collagen triple helix repeat:Collagen triple helix repeat; Type 4 procollagen, C-terminal repeat:Type 4 procollagen, C-terminal repeat; Collagen triple helix repeat:Collagen triple helix repeat; Type 4 procol…	1	21.31	123	SINFRUG00000134485 (dre-miR-let7l-a1)		dre-mir-103-3b dre-mir-107-2 dre-mir-9a dre-mir-9b dre-mir-9e dre-mir-9c dre-mir-9f dre-mir-9d fru-mir-9g dre-mir-98-3a dre-mir-98-3b dre-mir-let7l-a dre-mir-let7l-a1 dre-mir-let7l-a2 dre-mir-let7l-b1 dre-mir-let7l-c1 fru-mir-let7l-c2 dre-mir-let7l-d1 fru-mir-let7l-d2		3' UUGGUAUGUUGGAUGAUGGAGU 5' dre-mir-let7l-a1 __ ||::.|.:|||:||:||||||| __ 5' AAUU-UCUAACUUAUUACCUCA 3' ENSDART00000025947_P E:-21.309999 S:123.000000 Loc:232 Cons: 80.95%(fru)
dre-mir-let7l-a2	ENSDART00000025947_P	ENSDARG00000020781	SINFRUG00000134485		ENSDARG00000020781 4001 (4001 nt) [COLLAGEN ALPHA CHAIN; COLLAGEN ALPHA CHAIN; COLLAGEN ALPHA CHAIN; COLLAGEN ALPHA CHAIN; COLLAGEN ALPHA CHAIN; COLLAGEN ALPHA CHAIN; COLLAGEN ALPHA CHAIN;] [Collagen triple helix repeat:Collagen triple helix repeat; Type 4 procollagen, C-terminal repeat:Type 4 procollagen, C-terminal repeat; Collagen triple helix repeat:Collagen triple helix repeat; Type 4 procol…	1	21.31	123	SINFRUG00000134485 (dre-miR-let7l-a2)		dre-mir-103-3b dre-mir-107-2 dre-mir-9a dre-mir-9b dre-mir-9e dre-mir-9c dre-mir-9f dre-mir-9d fru-mir-9g dre-mir-98-3a dre-mir-98-3b dre-mir-let7l-a dre-mir-let7l-a1 dre-mir-let7l-a2 dre-mir-let7l-b1 dre-mir-let7l-c1 fru-mir-let7l-c2 dre-mir-let7l-d1 fru-mir-let7l-d2		3' UUGGUAUGUUGGAUGAUGGAGU 5' dre-mir-let7l-a2 __ ||::.|.:|||:||:||||||| __ 5' AAUU-UCUAACUUAUUACCUCA 3' ENSDART00000025947_P E:-21.309999 S:123.000000 Loc:232 Cons: 80.95%(fru)
fru-mir-29-2c	ENSDART00000016161_P	ENSDARG00000008229	SINFRUG00000149370		ENSDARG00000008229 4001 (4001 nt) [AMBIGUOUS; AMBIGUOUS; AMBIGUOUS;] []	1	21.74	123	SINFRUG00000149370 (fru-miR-29-2c)		dre-mir-139 fru-mir-29-2c		3' UGUGACUAAA-GUUUACCACGAUC 5' fru-mir-29-2c __ |.:|||||||.::|||||||:|.| __ 5' AGGCUGAUUUAUGAAUGGUGUUUG 3' ENSDART00000016161_P E:-21.74 S:123.000000 Loc:1422 Cons: 70.83%(fru)
dre-mir-101-1a	ENSDART00000009324_P	ENSDARG00000016755	SINFRUG00000124169		ENSDARG00000016755 4001 (4001 nt) [AMBIGUOUS;] [Synaptojanin, N-terminal:Synaptojanin, N-terminal;]	1	22.62	123	SINFRUG00000124169 (fru-miR-101-1a)		dre-mir-101-1a fru-mir-93-1a		3' GAAGUCAAUAGUGU-CAUGACAU 5' dre-mir-101-1a __ |||||.||.|||||.|||||||| __ 5' CUUCA-UU-UCACAUGUACUGUA 3' ENSDART00000009324_P E:-22.620001 S:123.000000 Loc:1758 Cons: 80.95%(fru)
dre-mir-141-1a	ENSDART00000027711_P	ENSDARG00000020370	SINFRUG00000129485		ENSDARG00000020370 4001 (4001 nt) [TRANSCRIPTION FACTOR SOX; TRANSCRIPTION FACTOR SOX; TRANSCRIPTION FACTOR SOX;] [HMG1/2 (high mobility group) box:HMG1/2 (high mobility group) box; HMG1/2 (high mobility group) box:HMG1/2 (high mobility group) box; HMG1/2 (high mobility group) box:HMG1/2 (high mobility group) box;]	1	22.59	123	SINFRUG00000129485 (fru-miR-141-1a)		dre-mir-122a dre-mir-141-1b dre-mir-141-1a		3' CGUAGCAAUGGUCUGUCACAA 5' dre-mir-141-1a __ ..||.||||.|||:||||||| __ 5' CAAUGGUUA-CAGGCAGUGUU 3' ENSDART00000027711_P E:-22.59 S:123.000000 Loc:2355 Cons: 70.00%(fru)
dre-mir-34-3b	ENSDART00000019184_P	ENSDARG00000015407	SINFRUG00000154578		ENSDARG00000015407 4001 (4001 nt) [LEUCINE RICH REPEAT TRANSMEMBRANE PRECURSOR FIBRONECTIN DOMAIN CONTAINING LEUCINE RICH TRANSMEMBRANE;] [Fibronectin, type III:Fibronectin, type III; Leucine-rich repeat:Leucine-rich repeat; Cysteine-rich flanking region, N-terminal:Cysteine-rich flanking region, N-terminal; Cysteine-rich flanking region, C-terminal:Cysteine-rich flanking region, C-terminal;]	1	24.22	123	SINFRUG00000154578 (dre-miR-34-3b)		dre-mir-106-a1 dre-mir-124-1b dre-mir-124-1a dre-mir-124-1c dre-mir-124-1d dre-mir-124-1e dre-mir-130-1a dre-mir-130-1c dre-mir-130-2a dre-mir-144 dre-mir-17-1a fru-mir-18-3 fru-mir-182-1 dre-mir-182 fru-mir-182-2 dre-mir-24-1 dre-mir-27-3a dre-mir-27-2a dre-mir-34-3b fru-mir-93-2b		3' CAUUAGUUGAU-UGACGUGACGGA 5' dre-mir-34-3b __ |||:|||.:|:.||||:|||.||| __ 5' GUAGUCAUUUGUACUGUACUUCCU 3' ENSDART00000019184_P E:-24.219999 S:123.000000 Loc:237 Cons: 87.50%(fru)
dre-mir-17-1a	ENSDART00000020175_P	ENSDARG00000002621	SINFRUG00000138846		ENSDARG00000002621 4001 (4001 nt) [AMBIGUOUS; AMBIGUOUS;] [Zn-finger, C2H2 type:Zn-finger, C2H2 type; BTB/POZ domain:BTB/POZ domain; Zn-finger, C2H2 type:Zn-finger, C2H2 type; BTB/POZ domain:BTB/POZ domain;]	1	24.68	123	SINFRUG00000138845 (fru-miR-17-1a)		dre-mir-17-1d fru-mir-17-1e dre-mir-17-1a dre-mir-17-1b dre-mir-17-1c dre-mir-20-2b dre-mir-20-1b dre-mir-20-1 dre-mir-20-2a fru-mir-93-2b fru-mir-93-1a		3' UGAUGGACGUGACAUUC-GUGAAAC 5' dre-mir-17-1a __ |:||||..::|||||||.||:|||| __ 5' AUUACC-AUGCUGUAAGACAUUUUG 3' ENSDART00000020175_P E:-24.68 S:123.000000 Loc:1026 Cons: 79.17%(fru)
dre-mir-17-1b	ENSDART00000020175_P	ENSDARG00000002621	SINFRUG00000138846		ENSDARG00000002621 4001 (4001 nt) [AMBIGUOUS; AMBIGUOUS;] [Zn-finger, C2H2 type:Zn-finger, C2H2 type; BTB/POZ domain:BTB/POZ domain; Zn-finger, C2H2 type:Zn-finger, C2H2 type; BTB/POZ domain:BTB/POZ domain;]	1	24.68	123	SINFRUG00000138845 (fru-miR-17-1b)		dre-mir-17-1d fru-mir-17-1e dre-mir-17-1a dre-mir-17-1b dre-mir-17-1c dre-mir-20-2b dre-mir-20-1b dre-mir-20-1 dre-mir-20-2a fru-mir-93-2b fru-mir-93-1a		3' UGAUGGACGUGACAUUC-GUGAAAC 5' dre-mir-17-1b __ |:||||..::|||||||.||:|||| __ 5' AUUACC-AUGCUGUAAGACAUUUUG 3' ENSDART00000020175_P E:-24.68 S:123.000000 Loc:1026 Cons: 79.17%(fru)
dre-mir-172	ENSDART00000008210_P	ENSDARG00000005362	SINFRUG00000134943		ENSDARG00000005362 4001 (4001 nt) [SARCOSPAN K RAS ONCOGENE ASSOCIATED KIRSTEN RAS ASSOCIATED;] []	1	27.18	123	SINFRUG00000134943 (dre-miR-172)		dre-mir-172 fru-mir-93-1b		3' UUGUUGGUCGAUUCUGUGACGGU 5' dre-mir-172 __ :||||.||||..||:|||||||. __ 5' GACAAACAGC--AGGCACUGCCU 3' ENSDART00000008210_P E:-27.18 S:123.000000 Loc:1933 Cons: 76.19%(fru)
dre-mir-17-1c	ENSDART00000026755_P	ENSDARG00000006860	SINFRUG00000123610		ENSDARG00000006860 4001 (4001 nt) [UBIQUITIN CARBOXYL TERMINAL HYDROLASE EC_3.1.2.15 UBIQUITIN THIOLESTERASE UBIQUITIN SPECIFIC PROCESSING PROTEASE DEUBIQUITINATING ENZYME;] [Ubiquitin thiolesterase, family 2:Ubiquitin thiolesterase, family 2;]	1	26.84	123	SINFRUG00000123610 (fru-miR-17-1c)		dre-mir-106-a1 dre-mir-17-1c dre-mir-17-1a dre-mir-18-2b dre-mir-18-3a fru-mir-18-3 dre-mir-18-2 dre-mir-18-3b fru-mir-190-1a dre-mir-190 dre-mir-31-2a fru-mir-93-2a fru-mir-93-2b dre-mir-93 fru-mir-93-1a		3' UGAUGGACGU-GA-UAUUCGUGAAAU 5' dre-mir-17-1c __ ::.|||||||.||.|.|:|||||||| __ 5' GUCACCUGCAUCUGAAAGGCACUUUA 3' ENSDART00000026755_P E:-26.84 S:123.000000 Loc:220 Cons: 80.77%(fru)
dre-mir-200a-1a	ENSDART00000012669_P	ENSDARG00000006871	SINFRUG00000120558		ENSDARG00000006871 4001 (4001 nt) [UNKNOWN;] []	1	28.66	123	SINFRUG00000120558 (fru-miR-200a-1a)		dre-mir-16-1 fru-mir-17-1e-as dre-mir-200a-1a		3' UUUGUAGCAAUGGUCU--GUCACAAUCUU 5' dre-mir-200a-1a __ |||.:|:|.|:|||||..::|||||||.. __ 5' AAAGGUUGCUGCCAGACGUGGUGUUAGUU 3' ENSDART00000012669_P E:-28.66 S:123.000000 Loc:351 Cons: 75.86%(fru)
dre-mir-29-2a	ENSDART00000007366_P	ENSDARG00000005892	SINFRUG00000130827		ENSDARG00000005892 4001 (4001 nt) [EPITHELIAL DISCOIDIN DOMAIN RECEPTOR 1 PRECURSOR EC_2.7.1.112 TYROSINE KINASE CAK CELL ADHESION KINASE TYROSINE KINASE DDR DISCOIDIN RECEPTOR TYROSINE KINASE TYROSINE KINASE; EPITHELIAL DISCOIDIN DOMAIN RECEPTOR 1 PRECURSOR EC_2.7.1.112 TYROSINE KINASE CAK CELL ADHESION KINASE TYROSINE KINASE DDR DISCOIDIN RECEPTOR TYROSINE KINASE TYROSINE KINASE; RECEPTOR PRECU…	1	28.19	123	SINFRUG00000128115 (fru-miR-29-2a)		dre-mir-205 fru-mir-205-1a fru-mir-29-2c dre-mir-29-2a fru-mir-29-12b dre-mir-29-2b dre-mir-31		3' AUUGUGACUAAAGUUUACCACGAUC 5' dre-mir-29-2a __ .|||||||.||.:|::|||||||:. __ 5' AAACACUG-UUCUAGGUGGUGCUGA 3' ENSDART00000007366_P E:-28.190001 S:123.000000 Loc:1305 Cons: 70.83%(fru)
dre-mir-29-2b	ENSDART00000007366_P	ENSDARG00000005892	SINFRUG00000130827		ENSDARG00000005892 4001 (4001 nt) [EPITHELIAL DISCOIDIN DOMAIN RECEPTOR 1 PRECURSOR EC_2.7.1.112 TYROSINE KINASE CAK CELL ADHESION KINASE TYROSINE KINASE DDR DISCOIDIN RECEPTOR TYROSINE KINASE TYROSINE KINASE; EPITHELIAL DISCOIDIN DOMAIN RECEPTOR 1 PRECURSOR EC_2.7.1.112 TYROSINE KINASE CAK CELL ADHESION KINASE TYROSINE KINASE DDR DISCOIDIN RECEPTOR TYROSINE KINASE TYROSINE KINASE; RECEPTOR PRECU…	1	28.19	123	SINFRUG00000128115 (dre-miR-29-2b)		dre-mir-205 fru-mir-205-1a fru-mir-29-2c dre-mir-29-2a fru-mir-29-12b dre-mir-29-2b dre-mir-31		3' AUUGUGACUAAAGUUUACCACGAUC 5' dre-mir-29-2b __ .|||||||.||.:|::|||||||:. __ 5' AAACACUG-UUCUAGGUGGUGCUGA 3' ENSDART00000007366_P E:-28.190001 S:123.000000 Loc:1305 Cons: 70.83%(fru)
dre-mir-103-1a	ENSDART00000026985_P	ENSDARG00000006015	SINFRUG00000147784		ENSDARG00000006015 4001 (4001 nt) [AMBIGUOUS; AMBIGUOUS;] []	1	24.24	123	SINFRUG00000147784 (fru-miR-103-1a)		dre-mir-103-1a dre-mir-103-3a fru-mir-103-3 dre-mir-103-2a dre-mir-103-3b fru-mir-107-1 dre-mir-107-1a dre-mir-107-1b dre-mir-107-2		3' AGUAUCGGGACAUGUUACGACGA 5' dre-mir-103-1a __ .||||||::|.|||.|||:||:| __ 5' ACAUAGCUUUUUACUAUGUUGUU 3' ENSDART00000026985_P E:-24.24 S:123.000000 Loc:979 Cons: 86.96%(fru)
dre-mir-103-2a	ENSDART00000026985_P	ENSDARG00000006015	SINFRUG00000147784		ENSDARG00000006015 4001 (4001 nt) [AMBIGUOUS; AMBIGUOUS;] []	1	24.24	123	SINFRUG00000147784 (fru-miR-103-2a)		dre-mir-103-1a dre-mir-103-3a fru-mir-103-3 dre-mir-103-2a dre-mir-103-3b fru-mir-107-1 dre-mir-107-1a dre-mir-107-1b dre-mir-107-2		3' AGUAUCGGGACAUGUUACGACGA 5' dre-mir-103-2a __ .||||||::|.|||.|||:||:| __ 5' ACAUAGCUUUUUACUAUGUUGUU 3' ENSDART00000026985_P E:-24.24 S:123.000000 Loc:979 Cons: 86.96%(fru)
dre-mir-107-1b	ENSDART00000026985_P	ENSDARG00000006015	SINFRUG00000147784		ENSDARG00000006015 4001 (4001 nt) [AMBIGUOUS; AMBIGUOUS;] []	1	24.24	123	SINFRUG00000147784 (fru-miR-107-1b)		dre-mir-103-1a dre-mir-103-3a fru-mir-103-3 dre-mir-103-2a dre-mir-103-3b fru-mir-107-1 dre-mir-107-1a dre-mir-107-1b dre-mir-107-2		3' AGUAUCGGGACAUGUUACGACGA 5' dre-mir-107-1b __ .||||||::|.|||.|||:||:| __ 5' ACAUAGCUUUUUACUAUGUUGUU 3' ENSDART00000026985_P E:-24.24 S:123.000000 Loc:979 Cons: 86.96%(fru)
dre-mir-98-2a	ENSDART00000004351	ENSDARG00000008069	SINFRUG00000123021		ENSDARG00000008069 879 (879 nt) [UBIQUITIN CARBOXYL TERMINAL HYDROLASE 3 EC_3.1.2.15 UBIQUITIN THIOLESTERASE 3 UBIQUITIN SPECIFIC PROCESSING PROTEASE 3 DEUBIQUITINATING ENZYME 3; UBIQUITIN CARBOXYL TERMINAL HYDROLASE 3 EC_3.1.2.15 UBIQUITIN THIOLESTERASE 3 UBIQUITIN SPECIFIC PROCESSING PROTEASE 3 DEUBIQUITINATING ENZYME 3; UBIQUITIN CARBOXYL TERMINAL HYDROLASE 3 EC_3.1.2.15 UBIQUITIN THIOLESTERAS…	1	22.39	123	SINFRUG00000123021 (fru-miR-98-2a)		dre-mir-98-3b dre-mir-98-2a dre-mir-98-3a dre-mir-let7l-a dre-mir-let7l-a1 dre-mir-let7l-a2 dre-mir-let7l-b1 dre-mir-let7l-c1 fru-mir-let7l-c2 dre-mir-let7l-d1 fru-mir-let7l-d2		3' UGUAUAUGUUAGAUGAUGGAGU 5' dre-mir-98-2a __ ||.|||:|||.:|::||||||| __ 5' AC-UAUGCAAAUUGUUACCUCA 3' ENSDART00000004351 E:-22.389999 S:123.000000 Loc:802 Cons: 85.71%(fru)
dre-mir-124-1b	ENSDART00000011581_P	ENSDARG00000010841	SINFRUG00000147317		ENSDARG00000010841 4001 (4001 nt) [CHROMODOMAIN HELICASE DNA BINDING;] [SNF2 related domain:SNF2 related domain; Helicase, C-terminal:Helicase, C-terminal;]	1	28.69	123	SINFRUG00000147317 (fru-miR-124-1b)		dre-mir-124-1b dre-mir-124-1c dre-mir-124-1a dre-mir-124-1d dre-mir-124-1e dre-mir-130-1b		3' GAACCGU-AAGUGGCGCACGGAAUU 5' dre-mir-124-1b __ .|.||:|.||||::|.||||||||: __ 5' AUGGGUAUUUCAUUGAGUGCCUUAG 3' ENSDART00000011581_P E:-28.690001 S:123.000000 Loc:1872 Cons: 72.00%(fru)
dre-mir-124-1c	ENSDART00000011581_P	ENSDARG00000010841	SINFRUG00000147317		ENSDARG00000010841 4001 (4001 nt) [CHROMODOMAIN HELICASE DNA BINDING;] [SNF2 related domain:SNF2 related domain; Helicase, C-terminal:Helicase, C-terminal;]	1	28.69	123	SINFRUG00000147317 (fru-miR-124-1c)		dre-mir-124-1b dre-mir-124-1c dre-mir-124-1a dre-mir-124-1d dre-mir-124-1e dre-mir-130-1b		3' GAACCGU-AAGUGGCGCACGGAAUU 5' dre-mir-124-1c __ .|.||:|.||||::|.||||||||: __ 5' AUGGGUAUUUCAUUGAGUGCCUUAG 3' ENSDART00000011581_P E:-28.690001 S:123.000000 Loc:1872 Cons: 72.00%(fru)
dre-mir-124-1a	ENSDART00000011581_P	ENSDARG00000010841	SINFRUG00000147317		ENSDARG00000010841 4001 (4001 nt) [CHROMODOMAIN HELICASE DNA BINDING;] [SNF2 related domain:SNF2 related domain; Helicase, C-terminal:Helicase, C-terminal;]	1	28.69	123	SINFRUG00000147317 (dre-miR-124-1a)		dre-mir-124-1b dre-mir-124-1c dre-mir-124-1a dre-mir-124-1d dre-mir-124-1e dre-mir-130-1b		3' GAACCGU-AAGUGGCGCACGGAAUU 5' dre-mir-124-1a __ .|.||:|.||||::|.||||||||: __ 5' AUGGGUAUUUCAUUGAGUGCCUUAG 3' ENSDART00000011581_P E:-28.690001 S:123.000000 Loc:1872 Cons: 72.00%(fru)
dre-mir-124-1d	ENSDART00000011581_P	ENSDARG00000010841	SINFRUG00000147317		ENSDARG00000010841 4001 (4001 nt) [CHROMODOMAIN HELICASE DNA BINDING;] [SNF2 related domain:SNF2 related domain; Helicase, C-terminal:Helicase, C-terminal;]	1	28.69	123	SINFRUG00000147317 (fru-miR-124-1d)		dre-mir-124-1b dre-mir-124-1c dre-mir-124-1a dre-mir-124-1d dre-mir-124-1e dre-mir-130-1b		3' GAACCGU-AAGUGGCGCACGGAAUU 5' dre-mir-124-1d __ .|.||:|.||||::|.||||||||: __ 5' AUGGGUAUUUCAUUGAGUGCCUUAG 3' ENSDART00000011581_P E:-28.690001 S:123.000000 Loc:1872 Cons: 72.00%(fru)
dre-mir-124-1e	ENSDART00000011581_P	ENSDARG00000010841	SINFRUG00000147317		ENSDARG00000010841 4001 (4001 nt) [CHROMODOMAIN HELICASE DNA BINDING;] [SNF2 related domain:SNF2 related domain; Helicase, C-terminal:Helicase, C-terminal;]	1	28.69	123	SINFRUG00000147317 (fru-miR-124-1e)		dre-mir-124-1b dre-mir-124-1c dre-mir-124-1a dre-mir-124-1d dre-mir-124-1e dre-mir-130-1b		3' GAACCGU-AAGUGGCGCACGGAAUU 5' dre-mir-124-1e __ .|.||:|.||||::|.||||||||: __ 5' AUGGGUAUUUCAUUGAGUGCCUUAG 3' ENSDART00000011581_P E:-28.690001 S:123.000000 Loc:1872 Cons: 72.00%(fru)
dre-mir-15-1a	ENSDART00000023950_P	ENSDARG00000020883	SINFRUG00000152986		ENSDARG00000020883 4001 (4001 nt) [ESTRADIOL 17 BETA DEHYDROGENASE 4 EC_1.1.1.62 17 BETA HSD 4 17 BETA HYDROXYSTEROID DEHYDROGENASE 4;] [Short-chain dehydrogenase/reductase SDR:Short-chain dehydrogenase/reductase SDR;]	1	25.5	123	SINFRUG00000152986 (fru-miR-15-1a)		dre-mir-15-1a dre-mir-15-1b		3' GUGUUUGGUAAGACACGACGAU 5' dre-mir-15-1a __ .|||.|:||..||||||||||: __ 5' GACACAUCA--CUGUGCUGCUG 3' ENSDART00000023950_P E:-25.5 S:123.000000 Loc:2093 Cons: 75.00%(fru)
dre-mir-15-1b	ENSDART00000023950_P	ENSDARG00000020883	SINFRUG00000152986		ENSDARG00000020883 4001 (4001 nt) [ESTRADIOL 17 BETA DEHYDROGENASE 4 EC_1.1.1.62 17 BETA HSD 4 17 BETA HYDROXYSTEROID DEHYDROGENASE 4;] [Short-chain dehydrogenase/reductase SDR:Short-chain dehydrogenase/reductase SDR;]	1	25.5	123	SINFRUG00000152986 (dre-miR-15-1b)		dre-mir-15-1a dre-mir-15-1b		3' GUGUUUGGUAAGACACGACGAU 5' dre-mir-15-1b __ .|||.|:||..||||||||||: __ 5' GACACAUCA--CUGUGCUGCUG 3' ENSDART00000023950_P E:-25.5 S:123.000000 Loc:2093 Cons: 75.00%(fru)
dre-mir-1-2a	ENSDART00000009739_P	ENSDARG00000008660	SINFRUG00000149496		ENSDARG00000008660 4001 (4001 nt) [CORONIN; CORONIN; CORONIN; CORONIN;] [G-protein beta WD-40 repeat:G-protein beta WD-40 repeat; G-protein beta WD-40 repeat:G-protein beta WD-40 repeat; G-protein beta WD-40 repeat:G-protein beta WD-40 repeat;]	1	23.11	123	SINFRUG00000149496 (dre-miR-1-2a)		dre-mir-1-2a		3' UGUGUGAAGGAAUGUAAGGU 5' dre-mir-1-2a __ |.|||||.||||||.||||| __ 5' AAACACUGCCUUACUUUCCA 3' ENSDART00000009739_P E:-23.110001 S:123.000000 Loc:1153 Cons: 75.00%(fru)
dre-mir-18-2	ENSDART00000027479_P	ENSDARG00000006569	SINFRUG00000130003		ENSDARG00000006569 4001 (4001 nt) [ETHANOLAMINE PHOSPHATE CYTIDYLYLTRANSFERASE EC_2.7.7.14 PHOSPHORYLETHANOLAMINE TRANSFERASE CTP:PHOSPHOETHANOLAMINE CYTIDYLYLTRANSFERASE;] [Cytidylyltransferase:Cytidylyltransferase;]	1	18.94	123	SINFRUG00000130003 (dre-miR-18-2)		dre-mir-18-2 dre-mir-18-2b		3' AUAGACGUGAUUUACGUGGAAU 5' dre-mir-18-2 __ |:|:||.|..||||||||:||: __ 5' UGUUUGAAGAAAAUGCACUUUG 3' ENSDART00000027479_P E:-18.940001 S:123.000000 Loc:158 Cons: 77.27%(fru)
dre-mir-18-2b	ENSDART00000027479_P	ENSDARG00000006569	SINFRUG00000130003		ENSDARG00000006569 4001 (4001 nt) [ETHANOLAMINE PHOSPHATE CYTIDYLYLTRANSFERASE EC_2.7.7.14 PHOSPHORYLETHANOLAMINE TRANSFERASE CTP:PHOSPHOETHANOLAMINE CYTIDYLYLTRANSFERASE;] [Cytidylyltransferase:Cytidylyltransferase;]	1	18.94	123	SINFRUG00000130003 (dre-miR-18-2b)		dre-mir-18-2 dre-mir-18-2b		3' AUAGACGUGAUUUACGUGGAAU 5' dre-mir-18-2b __ |:|:||.|..||||||||:||: __ 5' UGUUUGAAGAAAAUGCACUUUG 3' ENSDART00000027479_P E:-18.940001 S:123.000000 Loc:158 Cons: 77.27%(fru)
fru-mir-10b	ENSDART00000016296_P	ENSDARG00000012998	SINFRUG00000126849		ENSDARG00000012998 4001 (4001 nt) [HOMOLOG OF YEAST MAF1;] []	1	24.08	122	SINFRUG00000126849 (fru-miR-10b)		fru-mir-10b dre-mir-106-b1 dre-mir-138-2 dre-mir-200a-1a		3' UGUUUAAGCCAAGAUGUCCCAU 5' fru-mir-10b __ |:|.|.|.||||||||||||.| __ 5' AUAUACUGGGUUCUACAGGGGA 3' ENSDART00000016296_P E:-24.08 S:122.000000 Loc:2715 Cons: 72.73%(fru)
dre-mir-34-2b	ENSDART00000019546	ENSDARG00000013527	SINFRUG00000128355		ENSDARG00000013527 861 (861 nt) [STRIATIN;] [G-protein beta WD-40 repeat:G-protein beta WD-40 repeat;]	1	22.2	122	SINFRUG00000128355 (dre-miR-34-2b)		dre-mir-34-2b dre-mir-34-3a		3' UGUUAGUCGAU-UGUUGUGACGGA 5' dre-mir-34-2b __ |||||...|||.|||.|||||||| __ 5' ACAAUGUCCUACACAUCACUGCCU 3' ENSDART00000019546 E:-22.200001 S:122.000000 Loc:831 Cons: 70.83%(fru)
dre-mir-34-3a	ENSDART00000019546	ENSDARG00000013527	SINFRUG00000128355		ENSDARG00000013527 861 (861 nt) [STRIATIN;] [G-protein beta WD-40 repeat:G-protein beta WD-40 repeat;]	1	22.2	122	SINFRUG00000128355 (dre-miR-34-3a)		dre-mir-34-2b dre-mir-34-3a		3' UGUUAGUCGAU-UGUUGUGACGGA 5' dre-mir-34-3a __ |||||...|||.|||.|||||||| __ 5' ACAAUGUCCUACACAUCACUGCCU 3' ENSDART00000019546 E:-22.200001 S:122.000000 Loc:831 Cons: 70.83%(fru)
dre-mir-18-2b	ENSDART00000027165_P	ENSDARG00000007179	SINFRUG00000127660		ENSDARG00000007179 4001 (4001 nt) [SAM DOMAIN SAMSN 1 SAM DOMAIN SH3 DOMAIN AND NUCLEAR LOCALISATION SIGNALS 1; SAM DOMAIN SAMSN 1 SAM DOMAIN SH3 DOMAIN AND NUCLEAR LOCALISATION SIGNALS 1;] [SH3 domain:SH3 domain; Sterile alpha motif SAM:Sterile alpha motif SAM; SH3 domain:SH3 domain; Sterile alpha motif SAM:Sterile alpha motif SAM;]	1	21.69	122	SINFRUG00000127660 (dre-miR-18-2b)		fru-mir-128a dre-mir-128 fru-mir-128b fru-mir-18-1a dre-mir-18-3a dre-mir-18-2b fru-mir-18-3 dre-mir-18-2 dre-mir-18-3b dre-mir-18-1 fru-mir-18-1b		3' AUAGACGUGAUUUACGUGGAAU 5' dre-mir-18-2b __ ||.|||:|..||||||||:||| __ 5' UA-CUGUA-AAAAUGCACUUUA 3' ENSDART00000027165_P E:-21.690001 S:122.000000 Loc:2611 Cons: 85.00%(fru)
dre-mir-18-2	ENSDART00000027165_P	ENSDARG00000007179	SINFRUG00000127660		ENSDARG00000007179 4001 (4001 nt) [SAM DOMAIN SAMSN 1 SAM DOMAIN SH3 DOMAIN AND NUCLEAR LOCALISATION SIGNALS 1; SAM DOMAIN SAMSN 1 SAM DOMAIN SH3 DOMAIN AND NUCLEAR LOCALISATION SIGNALS 1;] [SH3 domain:SH3 domain; Sterile alpha motif SAM:Sterile alpha motif SAM; SH3 domain:SH3 domain; Sterile alpha motif SAM:Sterile alpha motif SAM;]	1	21.69	122	SINFRUG00000127660 (dre-miR-18-2)		fru-mir-128a dre-mir-128 fru-mir-128b fru-mir-18-1a dre-mir-18-3a dre-mir-18-2b fru-mir-18-3 dre-mir-18-2 dre-mir-18-3b dre-mir-18-1 fru-mir-18-1b		3' AUAGACGUGAUUUACGUGGAAU 5' dre-mir-18-2 __ ||.|||:|..||||||||:||| __ 5' UA-CUGUA-AAAAUGCACUUUA 3' ENSDART00000027165_P E:-21.690001 S:122.000000 Loc:2611 Cons: 85.00%(fru)
dre-mir-125-c-4	ENSDART00000009216_P	ENSDARG00000018472	SINFRUG00000130356		ENSDARG00000018472 3156 (3156 nt) [SULFITE OXIDASE MITOCHONDRIAL PRECURSOR EC_1.8.3.1;] [Eukaryotic molybdopterin oxidoreductase:Eukaryotic molybdopterin oxidoreductase; Cytochrome b5:Cytochrome b5; Mo-co oxidoreductase dimerisation domain:Mo-co oxidoreductase dimerisation domain;]	1	29.05	122	SINFRUG00000130356 (dre-miR-125-c-4)		dre-mir-125-c-4 dre-mir-125-c-2 dre-mir-125-c-1 dre-mir-125-c-3 fru-mir-125c-3		3' GUGUCCAAUUCCCAGAGUCCCU 5' dre-mir-125-c-4 __ .:::||||||.|||.||||||| __ 5' AGUGGGUUAA-GGUGUCAGGGA 3' ENSDART00000009216_P E:-29.049999 S:122.000000 Loc:469 Cons: 71.43%(fru)
dre-mir-125-c-2	ENSDART00000009216_P	ENSDARG00000018472	SINFRUG00000130356		ENSDARG00000018472 3156 (3156 nt) [SULFITE OXIDASE MITOCHONDRIAL PRECURSOR EC_1.8.3.1;] [Eukaryotic molybdopterin oxidoreductase:Eukaryotic molybdopterin oxidoreductase; Cytochrome b5:Cytochrome b5; Mo-co oxidoreductase dimerisation domain:Mo-co oxidoreductase dimerisation domain;]	1	29.05	122	SINFRUG00000130356 (fru-miR-125-c-2)		dre-mir-125-c-4 dre-mir-125-c-2 dre-mir-125-c-1 dre-mir-125-c-3 fru-mir-125c-3		3' GUGUCCAAUUCCCAGAGUCCCU 5' dre-mir-125-c-2 __ .:::||||||.|||.||||||| __ 5' AGUGGGUUAA-GGUGUCAGGGA 3' ENSDART00000009216_P E:-29.049999 S:122.000000 Loc:469 Cons: 71.43%(fru)
dre-mir-125-c-1	ENSDART00000009216_P	ENSDARG00000018472	SINFRUG00000130356		ENSDARG00000018472 3156 (3156 nt) [SULFITE OXIDASE MITOCHONDRIAL PRECURSOR EC_1.8.3.1;] [Eukaryotic molybdopterin oxidoreductase:Eukaryotic molybdopterin oxidoreductase; Cytochrome b5:Cytochrome b5; Mo-co oxidoreductase dimerisation domain:Mo-co oxidoreductase dimerisation domain;]	1	29.05	122	SINFRUG00000130356 (fru-miR-125-c-1)		dre-mir-125-c-4 dre-mir-125-c-2 dre-mir-125-c-1 dre-mir-125-c-3 fru-mir-125c-3		3' GUGUCCAAUUCCCAGAGUCCCU 5' dre-mir-125-c-1 __ .:::||||||.|||.||||||| __ 5' AGUGGGUUAA-GGUGUCAGGGA 3' ENSDART00000009216_P E:-29.049999 S:122.000000 Loc:469 Cons: 71.43%(fru)
dre-mir-125-c-3	ENSDART00000009216_P	ENSDARG00000018472	SINFRUG00000130356		ENSDARG00000018472 3156 (3156 nt) [SULFITE OXIDASE MITOCHONDRIAL PRECURSOR EC_1.8.3.1;] [Eukaryotic molybdopterin oxidoreductase:Eukaryotic molybdopterin oxidoreductase; Cytochrome b5:Cytochrome b5; Mo-co oxidoreductase dimerisation domain:Mo-co oxidoreductase dimerisation domain;]	1	29.05	122	SINFRUG00000130356 (dre-miR-125-c-3)		dre-mir-125-c-4 dre-mir-125-c-2 dre-mir-125-c-1 dre-mir-125-c-3 fru-mir-125c-3		3' GUGUCCAAUUCCCAGAGUCCCU 5' dre-mir-125-c-3 __ .:::||||||.|||.||||||| __ 5' AGUGGGUUAA-GGUGUCAGGGA 3' ENSDART00000009216_P E:-29.049999 S:122.000000 Loc:469 Cons: 71.43%(fru)
fru-mir-125c-3	ENSDART00000009216_P	ENSDARG00000018472	SINFRUG00000130356		ENSDARG00000018472 3156 (3156 nt) [SULFITE OXIDASE MITOCHONDRIAL PRECURSOR EC_1.8.3.1;] [Eukaryotic molybdopterin oxidoreductase:Eukaryotic molybdopterin oxidoreductase; Cytochrome b5:Cytochrome b5; Mo-co oxidoreductase dimerisation domain:Mo-co oxidoreductase dimerisation domain;]	1	29.05	122	SINFRUG00000130356 (fru-miR-125c-3)		dre-mir-125-c-4 dre-mir-125-c-2 dre-mir-125-c-1 dre-mir-125-c-3 fru-mir-125c-3		3' GUGUCCAAUUCCCAGAGUCCCU 5' fru-mir-125c-3 __ .:::||||||.|||.||||||| __ 5' AGUGGGUUAA-GGUGUCAGGGA 3' ENSDART00000009216_P E:-29.049999 S:122.000000 Loc:469 Cons: 71.43%(fru)
dre-mir-101-2a	ENSDART00000006050_P	ENSDARG00000002855	SINFRUG00000122741		ENSDARG00000002855 4001 (4001 nt) [MICROTUBULE ASSOCIATED RP/EB FAMILY MEMBER; MICROTUBULE ASSOCIATED RP/EB FAMILY MEMBER;] [EB1 protein:EB1 protein; EB1 protein:EB1 protein;]	1	18.35	122	SINFRUG00000122741 (dre-miR-101-2a)		dre-mir-101-2a fru-mir-101-2b		3' GAAGUCAAUAGUAUCAUGACAU 5' dre-mir-101-2a __ |||:|.||:|.|||||:||||. __ 5' CUUUAUUUGU-AUAGUGCUGUU 3' ENSDART00000006050_P E:-18.35 S:122.000000 Loc:2338 Cons: 71.43%(fru)
fru-mir-101-2b	ENSDART00000006050_P	ENSDARG00000002855	SINFRUG00000122741		ENSDARG00000002855 4001 (4001 nt) [MICROTUBULE ASSOCIATED RP/EB FAMILY MEMBER; MICROTUBULE ASSOCIATED RP/EB FAMILY MEMBER;] [EB1 protein:EB1 protein; EB1 protein:EB1 protein;]	1	18.35	122	SINFRUG00000122741 (fru-miR-101-2b)		dre-mir-101-2a fru-mir-101-2b		3' GAAGUCAAUAGUAUCAUGACAU 5' fru-mir-101-2b __ |||:|.||:|.|||||:||||. __ 5' CUUUAUUUGU-AUAGUGCUGUU 3' ENSDART00000006050_P E:-18.35 S:122.000000 Loc:2338 Cons: 71.43%(fru)
dre-mir-122a	ENSDART00000016709_P	ENSDARG00000020822	SINFRUG00000155266		ENSDARG00000020822 4001 (4001 nt) [AMBIGUOUS; AMBIGUOUS;] []	1	27.03	122	SINFRUG00000155266 (fru-miR-122a)		dre-mir-122a		3' UGUUUGUGGUAAC-AGUGUGAGGU 5' dre-mir-122a __ .|||||||:.|||.|||||||.|| __ 5' CCAAACACUUUUGAUCACACUGCA 3' ENSDART00000016709_P E:-27.030001 S:122.000000 Loc:1284 Cons: 75.00%(fru)
fru-mir-17-1e-as	ENSDART00000017731_P	ENSDARG00000010867	SINFRUG00000132415		ENSDARG00000010867 4001 (4001 nt) [NUCLEAR ZAP3; NUCLEAR ZAP3; NUCLEAR ZAP3; NUCLEAR ZAP3;] [Proline-rich extensin:Proline-rich extensin;]	1	24.23	122	SINFRUG00000132415 (fru-miR-17-1e-as)		fru-mir-17-1e-as dre-mir-194 fru-mir-194-1a		3' UCUUCA-CGAGUGUGACGUCA 5' fru-mir-17-1e-as __ :.||||.|:|:|||:|||||| __ 5' GUAAGUAGUUUACAUUGCAGU 3' ENSDART00000017731_P E:-24.23 S:122.000000 Loc:6 Cons: 76.19%(fru)
fru-mir-17-1e-as	ENSDART00000005952	ENSDARG00000019596	SINFRUG00000151123		ENSDARG00000019596 2518 (2518 nt) [INSULIN DEGRADING ENZYME EC_3.4.24.56 INSULYSIN INSULINASE INSULIN PROTEASE; INSULIN DEGRADING ENZYME EC_3.4.24.56 INSULYSIN INSULINASE INSULIN PROTEASE; INSULIN DEGRADING ENZYME EC_3.4.24.56 INSULYSIN INSULINASE INSULIN PROTEASE;] [Insulinase-like peptidase, family M16:Insulinase-like peptidase, family M16; Peptidase M16 inactive:Peptidase M16 inactive; Insulin…	1	28.11	122	SINFRUG00000151123 (fru-miR-17-1e-as)		fru-mir-17-1e-as dre-mir-30d-1		3' UCUUCACGAGUGUGACGUCA 5' fru-mir-17-1e-as __ |||:|||.||||:|.||||| __ 5' AGAGGUGGUCACGCAGCAGU 3' ENSDART00000005952 E:-28.110001 S:122.000000 Loc:2145 Cons: 75.00%(fru)
dre-mir-200a-1a	ENSDART00000006987_P	ENSDARG00000014544	SINFRUG00000150707		ENSDARG00000014544 4001 (4001 nt) [TBC1 DOMAIN FAMILY MEMBER 4; TBC1 DOMAIN FAMILY MEMBER 4;] [RabGAP/TBC domain:RabGAP/TBC domain;]	1	22	122	SINFRUG00000150707 (fru-miR-200a-1a)		dre-mir-200a-1a		3' UUUGUAGCAAUGGUCUGUCACAA-UCUU 5' dre-mir-200a-1a __ |||||.|.|||||..||||||||.:||| __ 5' AAACA-C-UUACC--ACAGUGUUCGGAA 3' ENSDART00000006987_P E:-22 S:122.000000 Loc:1068 Cons: 70.83%(fru)
dre-mir-1	ENSDART00000011210_P	ENSDARG00000018550	SINFRUG00000139288		ENSDARG00000018550 2686 (2686 nt) [WW DOMAIN BINDING 2 WBP 2;] []	1	19.59	122	SINFRUG00000139288 (fru-miR-1)		dre-mir-1 dre-mir-1-1a		3' UAUGUA-UGAAGAAAUGUAAGGU 5' dre-mir-1 __ .|:|||.||.|.||||:|||||| __ 5' UUGCAUGACCU-UUUAUAUUCCA 3' ENSDART00000011210_P E:-19.59 S:122.000000 Loc:2358 Cons: 72.73%(fru)
dre-mir-1-1a	ENSDART00000011210_P	ENSDARG00000018550	SINFRUG00000139288		ENSDARG00000018550 2686 (2686 nt) [WW DOMAIN BINDING 2 WBP 2;] []	1	19.59	122	SINFRUG00000139288 (fru-miR-1-1a)		dre-mir-1 dre-mir-1-1a		3' UAUGUA-UGAAGAAAUGUAAGGU 5' dre-mir-1-1a __ .|:|||.||.|.||||:|||||| __ 5' UUGCAUGACCU-UUUAUAUUCCA 3' ENSDART00000011210_P E:-19.59 S:122.000000 Loc:2358 Cons: 72.73%(fru)
fru-mir-101-2b	ENSDART00000025527	ENSDARG00000018206	SINFRUG00000152739		ENSDARG00000018206 1253 (1253 nt) [CYTOPLASMIC NCK ADAPTOR SH2/SH3 ADAPTOR NCK;] [SH2 motif:SH2 motif; SH3 domain:SH3 domain; Neutrophil cytosol factor 2:Neutrophil cytosol factor 2;]	1	21.21	122	SINFRUG00000152739 (fru-miR-101-2b)		fru-mir-101-2b dre-mir-101-2a		3' GAAGUCAAUAGUAUCAUGACAU 5' fru-mir-101-2b __ .|.|||..||:||:|||||||| __ 5' AUCCAG-CAUUAUGGUACUGUA 3' ENSDART00000025527 E:-21.209999 S:122.000000 Loc:1164 Cons: 80.95%(fru)
dre-mir-101-2a	ENSDART00000025527	ENSDARG00000018206	SINFRUG00000152739		ENSDARG00000018206 1253 (1253 nt) [CYTOPLASMIC NCK ADAPTOR SH2/SH3 ADAPTOR NCK;] [SH2 motif:SH2 motif; SH3 domain:SH3 domain; Neutrophil cytosol factor 2:Neutrophil cytosol factor 2;]	1	21.21	122	SINFRUG00000152739 (dre-miR-101-2a)		fru-mir-101-2b dre-mir-101-2a		3' GAAGUCAAUAGUAUCAUGACAU 5' dre-mir-101-2a __ .|.|||..||:||:|||||||| __ 5' AUCCAG-CAUUAUGGUACUGUA 3' ENSDART00000025527 E:-21.209999 S:122.000000 Loc:1164 Cons: 80.95%(fru)
dre-mir-96	ENSDART00000004281_P	ENSDARG00000012007	SINFRUG00000124652		ENSDARG00000012007 4001 (4001 nt) [AMBIGUOUS; AMBIGUOUS; AMBIGUOUS;] [Protein of unknown function DUF590:Protein of unknown function DUF590; Protein of unknown function DUF590:Protein of unknown function DUF590;]	1	23.5	122	SINFRUG00000124652 (dre-miR-96)		dre-mir-96		3' UCGU-UUUUACACGAUCACGGUUU 5' dre-mir-96 __ .|:|.||.|||||:|:|||::||| __ 5' UGUACAAUAUGUGUUGGUGUUAAA 3' ENSDART00000004281_P E:-23.5 S:122.000000 Loc:2616 Cons: 70.83%(fru)
dre-mir-142-2a	ENSDART00000024908	ENSDARG00000008728	SINFRUG00000129674		ENSDARG00000008728 533 (533 nt) [2 5A DEPENDENT RIBONUCLEASE EC_3.1.26.2 5A DEPENDENT RNASE RIBONUCLEASE L RNASE L RIBONUCLEASE 4; 2 5A DEPENDENT RIBONUCLEASE EC_3.1.26.2 5A DEPENDENT RNASE RIBONUCLEASE L RNASE L RIBONUCLEASE 4; 2 5A DEPENDENT RIBONUCLEASE EC_3.1.26.2 5A DEPENDENT RNASE RIBONUCLEASE L RNASE L RIBONUCLEASE 4; 2 5A DEPENDENT RIBONUCLEASE EC_3.1.26.2 5A DEPENDENT RNASE RIBONUCLEASE …	1	20.82	122	SINFRUG00000129670 (dre-miR-142-2a)		dre-mir-142-2a dre-mir-142-1a fru-mir-142-1b fru-mir-4a		3' CAUCACGAC-AGAUGAAAUAC 5' dre-mir-142-2a __ .|||||..|.||||||||||| __ 5' AUAGUG--GCUCUACUUUAUG 3' ENSDART00000024908 E:-20.82 S:122.000000 Loc:458 Cons: 94.74%(fru)
dre-mir-let7l-a	ENSDART00000014344_P	ENSDARG00000007781	SINFRUG00000151702		ENSDARG00000007781 4001 (4001 nt) [AMBIGUOUS;] [Immunoglobulin-like:Immunoglobulin-like; Leucine-rich repeat:Leucine-rich repeat; Cysteine-rich flanking region, C-terminal:Cysteine-rich flanking region, C-terminal;]	1	23.41	122	SINFRUG00000151702 (dre-miR-let7l-a)		dre-mir-98-3a dre-mir-98-3b dre-mir-let7l-a dre-mir-let7l-a1 dre-mir-let7l-a2 dre-mir-let7l-b1 dre-mir-let7l-c1 fru-mir-let7l-c2 dre-mir-let7l-d1 fru-mir-let7l-d2		3' UUGAUAUGUUGGAUGAUGG-AGU 5' dre-mir-let7l-a __ |||.||.|||||||:||||.||| __ 5' AACAAU-CAACCUAUUACCAUCA 3' ENSDART00000014344_P E:-23.41 S:122.000000 Loc:1498 Cons: 72.73%(fru)
dre-mir-let7l-a1	ENSDART00000014344_P	ENSDARG00000007781	SINFRUG00000151702		ENSDARG00000007781 4001 (4001 nt) [AMBIGUOUS;] [Immunoglobulin-like:Immunoglobulin-like; Leucine-rich repeat:Leucine-rich repeat; Cysteine-rich flanking region, C-terminal:Cysteine-rich flanking region, C-terminal;]	1	24.1	122	SINFRUG00000151702 (dre-miR-let7l-a1)		dre-mir-98-3a dre-mir-98-3b dre-mir-let7l-a dre-mir-let7l-a1 dre-mir-let7l-a2 dre-mir-let7l-b1 dre-mir-let7l-c1 fru-mir-let7l-c2 dre-mir-let7l-d1 fru-mir-let7l-d2		3' UUGGUAUGUUGGAUGAUGG-AGU 5' dre-mir-let7l-a1 __ |||.||.|||||||:||||.||| __ 5' AACAAU-CAACCUAUUACCAUCA 3' ENSDART00000014344_P E:-24.1 S:122.000000 Loc:1498 Cons: 77.27%(fru)
dre-mir-let7l-a2	ENSDART00000014344_P	ENSDARG00000007781	SINFRUG00000151702		ENSDARG00000007781 4001 (4001 nt) [AMBIGUOUS;] [Immunoglobulin-like:Immunoglobulin-like; Leucine-rich repeat:Leucine-rich repeat; Cysteine-rich flanking region, C-terminal:Cysteine-rich flanking region, C-terminal;]	1	24.1	122	SINFRUG00000151702 (dre-miR-let7l-a2)		dre-mir-98-3a dre-mir-98-3b dre-mir-let7l-a dre-mir-let7l-a1 dre-mir-let7l-a2 dre-mir-let7l-b1 dre-mir-let7l-c1 fru-mir-let7l-c2 dre-mir-let7l-d1 fru-mir-let7l-d2		3' UUGGUAUGUUGGAUGAUGG-AGU 5' dre-mir-let7l-a2 __ |||.||.|||||||:||||.||| __ 5' AACAAU-CAACCUAUUACCAUCA 3' ENSDART00000014344_P E:-24.1 S:122.000000 Loc:1498 Cons: 77.27%(fru)
dre-mir-let7l-b1	ENSDART00000014344_P	ENSDARG00000007781	SINFRUG00000151702		ENSDARG00000007781 4001 (4001 nt) [AMBIGUOUS;] [Immunoglobulin-like:Immunoglobulin-like; Leucine-rich repeat:Leucine-rich repeat; Cysteine-rich flanking region, C-terminal:Cysteine-rich flanking region, C-terminal;]	1	23.41	122	SINFRUG00000151702 (dre-miR-let7l-b1)		dre-mir-98-3a dre-mir-98-3b dre-mir-let7l-a dre-mir-let7l-a1 dre-mir-let7l-a2 dre-mir-let7l-b1 dre-mir-let7l-c1 fru-mir-let7l-c2 dre-mir-let7l-d1 fru-mir-let7l-d2		3' UUGAUAUGUUGGAUGAUGG-AGU 5' dre-mir-let7l-b1 __ |||.||.|||||||:||||.||| __ 5' AACAAU-CAACCUAUUACCAUCA 3' ENSDART00000014344_P E:-23.41 S:122.000000 Loc:1498 Cons: 72.73%(fru)
dre-mir-let7l-c1	ENSDART00000014344_P	ENSDARG00000007781	SINFRUG00000151702		ENSDARG00000007781 4001 (4001 nt) [AMBIGUOUS;] [Immunoglobulin-like:Immunoglobulin-like; Leucine-rich repeat:Leucine-rich repeat; Cysteine-rich flanking region, C-terminal:Cysteine-rich flanking region, C-terminal;]	1	23.41	122	SINFRUG00000151702 (fru-miR-let7l-c1)		dre-mir-98-3a dre-mir-98-3b dre-mir-let7l-a dre-mir-let7l-a1 dre-mir-let7l-a2 dre-mir-let7l-b1 dre-mir-let7l-c1 fru-mir-let7l-c2 dre-mir-let7l-d1 fru-mir-let7l-d2		3' UUGAUAUGUUGGAUGAUGG-AGU 5' dre-mir-let7l-c1 __ |||.||.|||||||:||||.||| __ 5' AACAAU-CAACCUAUUACCAUCA 3' ENSDART00000014344_P E:-23.41 S:122.000000 Loc:1498 Cons: 72.73%(fru)
fru-mir-let7l-c2	ENSDART00000014344_P	ENSDARG00000007781	SINFRUG00000151702		ENSDARG00000007781 4001 (4001 nt) [AMBIGUOUS;] [Immunoglobulin-like:Immunoglobulin-like; Leucine-rich repeat:Leucine-rich repeat; Cysteine-rich flanking region, C-terminal:Cysteine-rich flanking region, C-terminal;]	1	23.41	122	SINFRUG00000151702 (fru-miR-let7l-c2)		dre-mir-98-3a dre-mir-98-3b dre-mir-let7l-a dre-mir-let7l-a1 dre-mir-let7l-a2 dre-mir-let7l-b1 dre-mir-let7l-c1 fru-mir-let7l-c2 dre-mir-let7l-d1 fru-mir-let7l-d2		3' UUGAUAUGUUGGAUGAUGG-AGU 5' fru-mir-let7l-c2 __ |||.||.|||||||:||||.||| __ 5' AACAAU-CAACCUAUUACCAUCA 3' ENSDART00000014344_P E:-23.41 S:122.000000 Loc:1498 Cons: 72.73%(fru)
dre-mir-let7l-d1	ENSDART00000014344_P	ENSDARG00000007781	SINFRUG00000151702		ENSDARG00000007781 4001 (4001 nt) [AMBIGUOUS;] [Immunoglobulin-like:Immunoglobulin-like; Leucine-rich repeat:Leucine-rich repeat; Cysteine-rich flanking region, C-terminal:Cysteine-rich flanking region, C-terminal;]	1	23.41	122	SINFRUG00000151702 (fru-miR-let7l-d1)		dre-mir-98-3a dre-mir-98-3b dre-mir-let7l-a dre-mir-let7l-a1 dre-mir-let7l-a2 dre-mir-let7l-b1 dre-mir-let7l-c1 fru-mir-let7l-c2 dre-mir-let7l-d1 fru-mir-let7l-d2		3' UUGAUAUGUUGGAUGAUGG-AGU 5' dre-mir-let7l-d1 __ |||.||.|||||||:||||.||| __ 5' AACAAU-CAACCUAUUACCAUCA 3' ENSDART00000014344_P E:-23.41 S:122.000000 Loc:1498 Cons: 72.73%(fru)
fru-mir-let7l-d2	ENSDART00000014344_P	ENSDARG00000007781	SINFRUG00000151702		ENSDARG00000007781 4001 (4001 nt) [AMBIGUOUS;] [Immunoglobulin-like:Immunoglobulin-like; Leucine-rich repeat:Leucine-rich repeat; Cysteine-rich flanking region, C-terminal:Cysteine-rich flanking region, C-terminal;]	1	23.41	122	SINFRUG00000151702 (fru-miR-let7l-d2)		dre-mir-98-3a dre-mir-98-3b dre-mir-let7l-a dre-mir-let7l-a1 dre-mir-let7l-a2 dre-mir-let7l-b1 dre-mir-let7l-c1 fru-mir-let7l-c2 dre-mir-let7l-d1 fru-mir-let7l-d2		3' UUGAUAUGUUGGAUGAUGG-AGU 5' fru-mir-let7l-d2 __ |||.||.|||||||:||||.||| __ 5' AACAAU-CAACCUAUUACCAUCA 3' ENSDART00000014344_P E:-23.41 S:122.000000 Loc:1498 Cons: 72.73%(fru)
dre-mir-19-1c	ENSDART00000008901_P	ENSDARG00000011291	SINFRUG00000121789		ENSDARG00000011291 3638 (3638 nt) [AMBIGUOUS;] []	1	20.53	122	SINFRUG00000121789 (fru-miR-19-1c)		dre-mir-1-2c dre-mir-1-2b dre-mir-19-1c dre-mir-19-1d dre-mir-19-2a dre-mir-19-1b dre-mir-19-2b dre-mir-19-1a		3' AGUCAAAACGUAUCU-AAACGUGU 5' dre-mir-19-1c __ ||||||.||::|:||.||||||:: __ 5' UCAGUUCUGUGUGGAGUUUGCAUG 3' ENSDART00000008901_P E:-20.530001 S:122.000000 Loc:2607 Cons: 75.00%(fru)
dre-mir-19-1a	ENSDART00000008901_P	ENSDARG00000011291	SINFRUG00000121789		ENSDARG00000011291 3638 (3638 nt) [AMBIGUOUS;] []	1	20.53	122	SINFRUG00000121789 (fru-miR-19-1a)		dre-mir-1-2c dre-mir-1-2b dre-mir-19-1c dre-mir-19-1d dre-mir-19-2a dre-mir-19-1b dre-mir-19-2b dre-mir-19-1a		3' AGUCAAAACGUAUCU-AAACGUGU 5' dre-mir-19-1a __ ||||||.||::|:||.||||||:: __ 5' UCAGUUCUGUGUGGAGUUUGCAUG 3' ENSDART00000008901_P E:-20.530001 S:122.000000 Loc:2607 Cons: 75.00%(fru)
fru-mir-93-1b	ENSDART00000016466	ENSDARG00000006083	SINFRUG00000123565		ENSDARG00000006083 1622 (1622 nt) [BROMODOMAIN AND PHD FINGER CONTAINING; BROMODOMAIN AND PHD FINGER CONTAINING; BROMODOMAIN AND PHD FINGER CONTAINING; BROMODOMAIN AND PHD FINGER CONTAINING;] [Bromodomain:Bromodomain; PWWP domain:PWWP domain; Bromodomain:Bromodomain; Zn-finger-like, PHD finger:Zn-finger-like, PHD finger; PWWP domain:PWWP domain; Bromodomain:Bromodomain; Zn-finger-like, PHD finger…	1	25.41	122	SINFRUG00000123565 (fru-miR-93-1b)		dre-mir-15-3 dre-mir-34-3b fru-mir-93-1b		3' GAUGGACGU-GUUUGUCGUG-AAAAC 5' fru-mir-93-1b __ :|::|||||.||.|:||:||.||||| __ 5' UUGUCUGCAUCAUAUAGUACAUUUUG 3' ENSDART00000016466 E:-25.41 S:122.000000 Loc:1067 Cons: 80.77%(fru)
dre-mir-172	ENSDART00000023541_P	ENSDARG00000002318	SINFRUG00000138670		ENSDARG00000002318 4001 (4001 nt) [SERINE/THREONINE PHOSPHATASE 2B CATALYTIC SUBUNIT EC_3.1.3.16 CALMODULIN DEPENDENT CALCINEURIN A SUBUNIT CAM PRP CATALYTIC SUBUNIT; SERINE/THREONINE PHOSPHATASE 2B CATALYTIC SUBUNIT EC_3.1.3.16 CALMODULIN DEPENDENT CALCINEURIN A SUBUNIT CAM PRP CATALYTIC SUBUNIT;] [Serine/threonine-specific protein phosphatase and bis(5-nucleosyl)-tetraphosphatase:Serine/threoni…	1	32.1	122	SINFRUG00000138670 (dre-miR-172)		dre-mir-172		3' UUGUUGGUCGAUUCUGUGACGGU 5' dre-mir-172 __ |:||:||||..|.|:|||||||| __ 5' AGCAGCCAG--ACGGCACUGCCA 3' ENSDART00000023541_P E:-32.099998 S:122.000000 Loc:9 Cons: 76.19%(fru)
dre-mir-148-1b	ENSDART00000017752_P	ENSDARG00000021016	SINFRUG00000143040		ENSDARG00000021016 4001 (4001 nt) [CYTOSKELETON BICAUDAL D;] [M protein repeat:M protein repeat;]	1	25.02	122	SINFRUG00000143040 (fru-miR-148-1b)		dre-mir-148-1b fru-mir-18-1a dre-mir-18-1 fru-mir-18-1b		3' GGUUUCAAGACAGUACGUGACU 5' dre-mir-148-1b __ .::|||..||||||||||:||: __ 5' AUGAAG--CUGUCAUGCAUUGG 3' ENSDART00000017752_P E:-25.02 S:122.000000 Loc:2489 Cons: 70.00%(fru)
dre-mir-98-3a	ENSDART00000017445_P	ENSDARG00000002445	SINFRUG00000134881		ENSDARG00000002445 4001 (4001 nt) [PR DOMAIN ZINC FINGER 1 BETA INTERFERON GENE POSITIVE REGULATORY DOMAIN I BINDING FACTOR BLIMP 1; PR DOMAIN ZINC FINGER 1 BETA INTERFERON GENE POSITIVE REGULATORY DOMAIN I BINDING FACTOR BLIMP 1;] [Zn-finger, C2H2 type:Zn-finger, C2H2 type; Nuclear protein SET:Nuclear protein SET; Zn-finger, C2H2 type:Zn-finger, C2H2 type; Nuclear protein SET:Nuclear protein SET…	1	25.28	122	SINFRUG00000134881 (fru-miR-98-3a)		dre-mir-98-3a dre-mir-98-3b dre-mir-let7l-a1 dre-mir-let7l-a2		3' UUGGUGUGUUGGAUGAUGGAGU 5' dre-mir-98-3a __ .||||.||||.||::||||||| __ 5' UACCA-ACAA-CUGUUACCUCA 3' ENSDART00000017445_P E:-25.280001 S:122.000000 Loc:605 Cons: 75.00%(fru)
dre-mir-98-3b	ENSDART00000017445_P	ENSDARG00000002445	SINFRUG00000134881		ENSDARG00000002445 4001 (4001 nt) [PR DOMAIN ZINC FINGER 1 BETA INTERFERON GENE POSITIVE REGULATORY DOMAIN I BINDING FACTOR BLIMP 1; PR DOMAIN ZINC FINGER 1 BETA INTERFERON GENE POSITIVE REGULATORY DOMAIN I BINDING FACTOR BLIMP 1;] [Zn-finger, C2H2 type:Zn-finger, C2H2 type; Nuclear protein SET:Nuclear protein SET; Zn-finger, C2H2 type:Zn-finger, C2H2 type; Nuclear protein SET:Nuclear protein SET…	1	25.28	122	SINFRUG00000134881 (fru-miR-98-3b)		dre-mir-98-3a dre-mir-98-3b dre-mir-let7l-a1 dre-mir-let7l-a2		3' UUGGUGUGUUGGAUGAUGGAGU 5' dre-mir-98-3b __ .||||.||||.||::||||||| __ 5' UACCA-ACAA-CUGUUACCUCA 3' ENSDART00000017445_P E:-25.280001 S:122.000000 Loc:605 Cons: 75.00%(fru)
dre-mir-let7l-a1	ENSDART00000017445_P	ENSDARG00000002445	SINFRUG00000134881		ENSDARG00000002445 4001 (4001 nt) [PR DOMAIN ZINC FINGER 1 BETA INTERFERON GENE POSITIVE REGULATORY DOMAIN I BINDING FACTOR BLIMP 1; PR DOMAIN ZINC FINGER 1 BETA INTERFERON GENE POSITIVE REGULATORY DOMAIN I BINDING FACTOR BLIMP 1;] [Zn-finger, C2H2 type:Zn-finger, C2H2 type; Nuclear protein SET:Nuclear protein SET; Zn-finger, C2H2 type:Zn-finger, C2H2 type; Nuclear protein SET:Nuclear protein SET…	1	25.28	122	SINFRUG00000134881 (dre-miR-let7l-a1)		dre-mir-98-3a dre-mir-98-3b dre-mir-let7l-a1 dre-mir-let7l-a2		3' UUGGUAUGUUGGAUGAUGGAGU 5' dre-mir-let7l-a1 __ .||||.||||.||::||||||| __ 5' UACCA-ACAA-CUGUUACCUCA 3' ENSDART00000017445_P E:-25.280001 S:122.000000 Loc:605 Cons: 75.00%(fru)
dre-mir-let7l-a2	ENSDART00000017445_P	ENSDARG00000002445	SINFRUG00000134881		ENSDARG00000002445 4001 (4001 nt) [PR DOMAIN ZINC FINGER 1 BETA INTERFERON GENE POSITIVE REGULATORY DOMAIN I BINDING FACTOR BLIMP 1; PR DOMAIN ZINC FINGER 1 BETA INTERFERON GENE POSITIVE REGULATORY DOMAIN I BINDING FACTOR BLIMP 1;] [Zn-finger, C2H2 type:Zn-finger, C2H2 type; Nuclear protein SET:Nuclear protein SET; Zn-finger, C2H2 type:Zn-finger, C2H2 type; Nuclear protein SET:Nuclear protein SET…	1	25.28	122	SINFRUG00000134881 (dre-miR-let7l-a2)		dre-mir-98-3a dre-mir-98-3b dre-mir-let7l-a1 dre-mir-let7l-a2		3' UUGGUAUGUUGGAUGAUGGAGU 5' dre-mir-let7l-a2 __ .||||.||||.||::||||||| __ 5' UACCA-ACAA-CUGUUACCUCA 3' ENSDART00000017445_P E:-25.280001 S:122.000000 Loc:605 Cons: 75.00%(fru)
dre-mir-184	ENSDART00000003548_P	ENSDARG00000009899	SINFRUG00000152855		ENSDARG00000009899 4001 (4001 nt) [AMBIGUOUS;] [Proline-rich extensin:Proline-rich extensin; Zn-finger, C2H2 type:Zn-finger, C2H2 type;]	1	23.14	122	SINFRUG00000152269 (dre-miR-184)		dre-mir-184		3' CGGGAAUAGUCAAGAGGCAGGU 5' dre-mir-184 __ ||:|||||:|.||:|::|||:| __ 5' GCUCUUAUUA-UUUUUUGUCUA 3' ENSDART00000003548_P E:-23.139999 S:122.000000 Loc:2658 Cons: 76.19%(fru)
dre-mir-143-1a	ENSDART00000009219_P	ENSDARG00000008399	SINFRUG00000153719		ENSDARG00000008399 4001 (4001 nt) [COMPLEMENT C1Q TUMOR NECROSIS FACTOR RELATED PRECURSOR;] [Complement C1q protein:Complement C1q protein; Collagen triple helix repeat:Collagen triple helix repeat;]	1	28.9	122	SINFRUG00000153719 (fru-miR-143-1a)		dre-mir-143-1a fru-mir-304		3' GCUCGAUGUC-A-CGAAGUAGAGU 5' dre-mir-143-1a __ .|||||||||.|.|||.|||:||| __ 5' AGAGCUACAGAUGGCUCCAUUUCA 3' ENSDART00000009219_P E:-28.9 S:122.000000 Loc:592 Cons: 70.83%(fru)
fru-mir-29-12b	ENSDART00000022513_P	ENSDARG00000020573	SINFRUG00000139154		ENSDARG00000020573 4001 (4001 nt) [ATP DEPENDENT RNA HELICASE; ATP DEPENDENT RNA HELICASE;] [DEAD/DEAH box helicase:DEAD/DEAH box helicase; Helicase, C-terminal:Helicase, C-terminal; DEAD/DEAH box helicase:DEAD/DEAH box helicase; Helicase, C-terminal:Helicase, C-terminal;]	1	17.2	122	SINFRUG00000139154 (fru-miR-29-12b)		dre-mir-124-1c dre-mir-124-1e dre-mir-124-1a dre-mir-124-1d dre-mir-124-1b dre-mir-16-3 fru-mir-200b-2a dre-mir-23-b1 dre-mir-23-a1 dre-mir-23-c1 fru-mir-23-c2 fru-mir-29-12b dre-mir-34 fru-mir-79-1e dre-mir-79 dre-mir-79-1c fru-mir-79-1d dre-mir-79-1b fru-mir-93-1b		3' AUUGUGGCUAAAGUUUACCACGAUC 5' fru-mir-29-12b __ .|||.:|.|.||.:||||||||||. __ 5' GAACUUCAAGUU-GAAUGGUGCUAC 3' ENSDART00000022513_P E:-17.200001 S:122.000000 Loc:924 Cons: 75.00%(fru)
dre-mir-106-a1	ENSDART00000025123_P	ENSDARG00000003243	SINFRUG00000138230		ENSDARG00000003243 4001 (4001 nt) [AMBIGUOUS;] []	1	21.62	122	SINFRUG00000138230 (fru-miR-106-a1)		dre-mir-106-a1 dre-mir-106-b1 dre-mir-17-1a fru-mir-17-1e dre-mir-17-1c dre-mir-17-1d dre-mir-17-1b dre-mir-20-1b dre-mir-20-1 dre-mir-20-2b dre-mir-20-2a fru-mir-93-2b dre-mir-let7l-a1 dre-mir-let7l-a2		3' GAUGGACG-UGACAUUCGUGAAAC 5' dre-mir-106-a1 __ ..||:|||.|:|.|:||||||||. __ 5' GAACUUGCUAUUCUGAGCACUUUC 3' ENSDART00000025123_P E:-21.620001 S:122.000000 Loc:553 Cons: 75.00%(fru)
dre-mir-106-b1	ENSDART00000025123_P	ENSDARG00000003243	SINFRUG00000138230		ENSDARG00000003243 4001 (4001 nt) [AMBIGUOUS;] []	1	21.74	122	SINFRUG00000138230 (dre-miR-106-b1)		dre-mir-106-a1 dre-mir-106-b1 dre-mir-17-1a fru-mir-17-1e dre-mir-17-1c dre-mir-17-1d dre-mir-17-1b dre-mir-20-1b dre-mir-20-1 dre-mir-20-2b dre-mir-20-2a fru-mir-93-2b dre-mir-let7l-a1 dre-mir-let7l-a2		3' AUGGACG-UGAUAUUCGUGAAAU 5' dre-mir-106-b1 __ .||:|||.|:|.|:||||||||. __ 5' AACUUGCUAUUCUGAGCACUUUC 3' ENSDART00000025123_P E:-21.74 S:122.000000 Loc:553 Cons: 78.26%(fru)
dre-mir-17-1a	ENSDART00000025123_P	ENSDARG00000003243	SINFRUG00000138230		ENSDARG00000003243 4001 (4001 nt) [AMBIGUOUS;] []	1	21.62	122	SINFRUG00000138230 (fru-miR-17-1a)		dre-mir-106-a1 dre-mir-106-b1 dre-mir-17-1a fru-mir-17-1e dre-mir-17-1c dre-mir-17-1d dre-mir-17-1b dre-mir-20-1b dre-mir-20-1 dre-mir-20-2b dre-mir-20-2a fru-mir-93-2b dre-mir-let7l-a1 dre-mir-let7l-a2		3' UGAUGGACG-UGACAUUCGUGAAAC 5' dre-mir-17-1a __ |..||:|||.|:|.|:||||||||. __ 5' AGAACUUGCUAUUCUGAGCACUUUC 3' ENSDART00000025123_P E:-21.620001 S:122.000000 Loc:553 Cons: 80.00%(fru)
fru-mir-17-1e	ENSDART00000025123_P	ENSDARG00000003243	SINFRUG00000138230		ENSDARG00000003243 4001 (4001 nt) [AMBIGUOUS;] []	1	21.74	122	SINFRUG00000138230 (fru-miR-17-1e)		dre-mir-106-a1 dre-mir-106-b1 dre-mir-17-1a fru-mir-17-1e dre-mir-17-1c dre-mir-17-1d dre-mir-17-1b dre-mir-20-1b dre-mir-20-1 dre-mir-20-2b dre-mir-20-2a fru-mir-93-2b dre-mir-let7l-a1 dre-mir-let7l-a2		3' UGAUGGACG-UGACAUUCGUGAAAU 5' fru-mir-17-1e __ |..||:|||.|:|.|:||||||||. __ 5' AGAACUUGCUAUUCUGAGCACUUUC 3' ENSDART00000025123_P E:-21.74 S:122.000000 Loc:553 Cons: 80.00%(fru)
dre-mir-17-1c	ENSDART00000025123_P	ENSDARG00000003243	SINFRUG00000138230		ENSDARG00000003243 4001 (4001 nt) [AMBIGUOUS;] []	1	21.74	122	SINFRUG00000138230 (fru-miR-17-1c)		dre-mir-106-a1 dre-mir-106-b1 dre-mir-17-1a fru-mir-17-1e dre-mir-17-1c dre-mir-17-1d dre-mir-17-1b dre-mir-20-1b dre-mir-20-1 dre-mir-20-2b dre-mir-20-2a fru-mir-93-2b dre-mir-let7l-a1 dre-mir-let7l-a2		3' UGAUGGACG-UGAUAUUCGUGAAAU 5' dre-mir-17-1c __ |..||:|||.|:|.|:||||||||. __ 5' AGAACUUGCUAUUCUGAGCACUUUC 3' ENSDART00000025123_P E:-21.74 S:122.000000 Loc:553 Cons: 80.00%(fru)
dre-mir-17-1b	ENSDART00000025123_P	ENSDARG00000003243	SINFRUG00000138230		ENSDARG00000003243 4001 (4001 nt) [AMBIGUOUS;] []	1	21.62	122	SINFRUG00000138230 (fru-miR-17-1b)		dre-mir-106-a1 dre-mir-106-b1 dre-mir-17-1a fru-mir-17-1e dre-mir-17-1c dre-mir-17-1d dre-mir-17-1b dre-mir-20-1b dre-mir-20-1 dre-mir-20-2b dre-mir-20-2a fru-mir-93-2b dre-mir-let7l-a1 dre-mir-let7l-a2		3' UGAUGGACG-UGACAUUCGUGAAAC 5' dre-mir-17-1b __ |..||:|||.|:|.|:||||||||. __ 5' AGAACUUGCUAUUCUGAGCACUUUC 3' ENSDART00000025123_P E:-21.620001 S:122.000000 Loc:553 Cons: 80.00%(fru)
dre-mir-20-1b	ENSDART00000025123_P	ENSDARG00000003243	SINFRUG00000138230		ENSDARG00000003243 4001 (4001 nt) [AMBIGUOUS;] []	1	21.74	122	SINFRUG00000138230 (fru-miR-20-1b)		dre-mir-106-a1 dre-mir-106-b1 dre-mir-17-1a fru-mir-17-1e dre-mir-17-1c dre-mir-17-1d dre-mir-17-1b dre-mir-20-1b dre-mir-20-1 dre-mir-20-2b dre-mir-20-2a fru-mir-93-2b dre-mir-let7l-a1 dre-mir-let7l-a2		3' GAUGGACG-UGAUAUUCGUGAAAU 5' dre-mir-20-1b __ ..||:|||.|:|.|:||||||||. __ 5' GAACUUGCUAUUCUGAGCACUUUC 3' ENSDART00000025123_P E:-21.74 S:122.000000 Loc:553 Cons: 79.17%(fru)
dre-mir-20-1	ENSDART00000025123_P	ENSDARG00000003243	SINFRUG00000138230		ENSDARG00000003243 4001 (4001 nt) [AMBIGUOUS;] []	1	21.74	122	SINFRUG00000138230 (fru-miR-20-1)		dre-mir-106-a1 dre-mir-106-b1 dre-mir-17-1a fru-mir-17-1e dre-mir-17-1c dre-mir-17-1d dre-mir-17-1b dre-mir-20-1b dre-mir-20-1 dre-mir-20-2b dre-mir-20-2a fru-mir-93-2b dre-mir-let7l-a1 dre-mir-let7l-a2		3' GAUGGACG-UGAUAUUCGUGAAAU 5' dre-mir-20-1 __ ..||:|||.|:|.|:||||||||. __ 5' GAACUUGCUAUUCUGAGCACUUUC 3' ENSDART00000025123_P E:-21.74 S:122.000000 Loc:553 Cons: 79.17%(fru)
fru-mir-93-2b	ENSDART00000025123_P	ENSDARG00000003243	SINFRUG00000138230		ENSDARG00000003243 4001 (4001 nt) [AMBIGUOUS;] []	1	21.62	122	SINFRUG00000138230 (fru-miR-93-2b)		dre-mir-106-a1 dre-mir-106-b1 dre-mir-17-1a fru-mir-17-1e dre-mir-17-1c dre-mir-17-1d dre-mir-17-1b dre-mir-20-1b dre-mir-20-1 dre-mir-20-2b dre-mir-20-2a fru-mir-93-2b dre-mir-let7l-a1 dre-mir-let7l-a2		3' GAUGGACG-UGACAUUCGUGAAAC 5' fru-mir-93-2b __ ..||:|||.|:|.|:||||||||. __ 5' GAACUUGCUAUUCUGAGCACUUUC 3' ENSDART00000025123_P E:-21.620001 S:122.000000 Loc:553 Cons: 79.17%(fru)
dre-mir-93	ENSDART00000007593_P	ENSDARG00000009840	SINFRUG00000125532		ENSDARG00000009840 4001 (4001 nt) [HAPTOGLOBIN;] [Chymotrypsin serine protease, family S1:Chymotrypsin serine protease, family S1; Serine protease, trypsin family:Serine protease, trypsin family;]	1	23.25	122	SINFRUG00000125532 (dre-miR-93)		dre-mir-31 dre-mir-93		3' GAUGGACGUG--UUUGUCGUGAAA 5' dre-mir-93 __ ||:::.||||..|.|||||||||| __ 5' CUGUUAGCACUGAUACAGCACUUU 3' ENSDART00000007593_P E:-23.25 S:122.000000 Loc:2126 Cons: 70.83%(fru)
dre-mir-140	ENSDART00000015303_P	ENSDARG00000007194	SINFRUG00000147922		ENSDARG00000007194 4001 (4001 nt) [SIMILAR TO GENE SUPPORTED BY DNA SEGMENT CHR 1 ERATO DOI 622 EXPRESSED;] []	1	20.83	122	SINFRUG00000147922 (fru-miR-140)		dre-mir-140		3' GAUGGUAUC--CCAUUUUGGUGA 5' dre-mir-140 __ ||||::|||..||.|||||||:| __ 5' CUACUGUAGAUGGCAAAACCAUU 3' ENSDART00000015303_P E:-20.83 S:122.000000 Loc:1192 Cons: 73.91%(fru)
dre-mir-196-1b	ENSDART00000018652_P	ENSDARG00000012494	SINFRUG00000146408		ENSDARG00000012494 4001 (4001 nt) [PRECURSOR;] [Chymotrypsin serine protease, family S1:Chymotrypsin serine protease, family S1; Serine protease, trypsin family:Serine protease, trypsin family;]	1	20.53	122	SINFRUG00000146408 (fru-miR-196-1b)		dre-mir-196-1a dre-mir-196-1b dre-mir-196-1c dre-mir-20-2a dre-mir-20-2b fru-mir-93-2b		3' GGUUGUUGUACUUUGAUGGAU 5' dre-mir-196-1b __ :|||||:|..||||.|||||| __ 5' UCAACAGCUAGAAAAUACCUA 3' ENSDART00000018652_P E:-20.530001 S:122.000000 Loc:514 Cons: 71.43%(fru)
dre-mir-196-1c	ENSDART00000018652_P	ENSDARG00000012494	SINFRUG00000146408		ENSDARG00000012494 4001 (4001 nt) [PRECURSOR;] [Chymotrypsin serine protease, family S1:Chymotrypsin serine protease, family S1; Serine protease, trypsin family:Serine protease, trypsin family;]	1	20.53	122	SINFRUG00000146408 (dre-miR-196-1c)		dre-mir-196-1a dre-mir-196-1b dre-mir-196-1c dre-mir-20-2a dre-mir-20-2b fru-mir-93-2b		3' GGUUGUUGUACUUUGAUGGAU 5' dre-mir-196-1c __ :|||||:|..||||.|||||| __ 5' UCAACAGCUAGAAAAUACCUA 3' ENSDART00000018652_P E:-20.530001 S:122.000000 Loc:514 Cons: 71.43%(fru)
dre-mir-135-3a	ENSDART00000024511	ENSDARG00000010344	SINFRUG00000137642		ENSDARG00000010344 1808 (1808 nt) [UNKNOWN; UNKNOWN; UNKNOWN;] [Splicing factor PWI:Splicing factor PWI; RNA-binding region RNP-1 (RNA recognition motif):RNA-binding region RNP-1 (RNA recognition motif); Splicing factor PWI:Splicing factor PWI; RNA-binding region RNP-1 (RNA recognition motif):RNA-binding region RNP-1 (RNA recognition motif);]	1	23.46	122	SINFRUG00000137642 (fru-miR-135-3a)		dre-mir-135-3a		3' AGUCUAUCCUUAUUUUUCGGUAU 5' dre-mir-135-3a __ ||||||:|.||.|::::|||||| __ 5' UCAGAUGGUAA-AGGGGGCCAUA 3' ENSDART00000024511 E:-23.459999 S:122.000000 Loc:136 Cons: 77.27%(fru)
fru-mir-10c	ENSDART00000007908_P	ENSDARG00000007029	SINFRUG00000141488		ENSDARG00000007029 4001 (4001 nt) [KINESIN;] [Kinesin, motor region:Kinesin, motor region;]	1	21.47	122	SINFRUG00000141488 (fru-miR-10c)		fru-mir-10c dre-mir-18-3b dre-mir-18-3a dre-mir-187 dre-mir-98-3b dre-mir-98-3a		3' UGUGUAAGCCAAGAUGUCCCAU 5' fru-mir-10c __ |||.|||:..||:||||||||: __ 5' ACAGAUUU--UUUUACAGGGUG 3' ENSDART00000007908_P E:-21.469999 S:122.000000 Loc:1752 Cons: 70.00%(fru)
fru-mir-103-3	ENSDART00000009253_P	ENSDARG00000001865	SINFRUG00000146091		ENSDARG00000001865 4001 (4001 nt) [CORTICOLIBERIN PRECURSOR CORTICOTROPIN RELEASING FACTOR CRF CORTICOTROPIN RELEASING HORMONE;] [Corticotropin-releasing factor, CRF:Corticotropin-releasing factor, CRF;]	1	25.81	122	SINFRUG00000146091 (fru-miR-103-3)		fru-mir-103-3 dre-mir-103-3b dre-mir-103-3a dre-mir-107-1a fru-mir-107-1 dre-mir-107-2		3' AC-UAUCGGGACA---UGUUACGACGA 5' fru-mir-103-3 __ ||.|||.|:||||...|:|:||||||| __ 5' UGAAUA-CUCUGUACCAUAGUGCUGCU 3' ENSDART00000009253_P E:-25.809999 S:122.000000 Loc:54 Cons: 73.08%(fru)
dre-mir-103-3a	ENSDART00000009253_P	ENSDARG00000001865	SINFRUG00000146091		ENSDARG00000001865 4001 (4001 nt) [CORTICOLIBERIN PRECURSOR CORTICOTROPIN RELEASING FACTOR CRF CORTICOTROPIN RELEASING HORMONE;] [Corticotropin-releasing factor, CRF:Corticotropin-releasing factor, CRF;]	1	25.81	122	SINFRUG00000146091 (dre-miR-103-3a)		fru-mir-103-3 dre-mir-103-3b dre-mir-103-3a dre-mir-107-1a fru-mir-107-1 dre-mir-107-2		3' AC-UAUCGGGACA---UGUUACGACGA 5' dre-mir-103-3a __ ||.|||.|:||||...|:|:||||||| __ 5' UGAAUA-CUCUGUACCAUAGUGCUGCU 3' ENSDART00000009253_P E:-25.809999 S:122.000000 Loc:54 Cons: 73.08%(fru)
dre-mir-107-1a	ENSDART00000009253_P	ENSDARG00000001865	SINFRUG00000146091		ENSDARG00000001865 4001 (4001 nt) [CORTICOLIBERIN PRECURSOR CORTICOTROPIN RELEASING FACTOR CRF CORTICOTROPIN RELEASING HORMONE;] [Corticotropin-releasing factor, CRF:Corticotropin-releasing factor, CRF;]	1	25.81	122	SINFRUG00000146091 (dre-miR-107-1a)		fru-mir-103-3 dre-mir-103-3b dre-mir-103-3a dre-mir-107-1a fru-mir-107-1 dre-mir-107-2		3' AC-UAUCGGGACA---UGUUACGACGA 5' dre-mir-107-1a __ ||.|||.|:||||...|:|:||||||| __ 5' UGAAUA-CUCUGUACCAUAGUGCUGCU 3' ENSDART00000009253_P E:-25.809999 S:122.000000 Loc:54 Cons: 73.08%(fru)
fru-mir-107-1	ENSDART00000009253_P	ENSDARG00000001865	SINFRUG00000146091		ENSDARG00000001865 4001 (4001 nt) [CORTICOLIBERIN PRECURSOR CORTICOTROPIN RELEASING FACTOR CRF CORTICOTROPIN RELEASING HORMONE;] [Corticotropin-releasing factor, CRF:Corticotropin-releasing factor, CRF;]	1	25.81	122	SINFRUG00000146091 (fru-miR-107-1)		fru-mir-103-3 dre-mir-103-3b dre-mir-103-3a dre-mir-107-1a fru-mir-107-1 dre-mir-107-2		3' AC-UAUCGGGACA---UGUUACGACGA 5' fru-mir-107-1 __ ||.|||.|:||||...|:|:||||||| __ 5' UGAAUA-CUCUGUACCAUAGUGCUGCU 3' ENSDART00000009253_P E:-25.809999 S:122.000000 Loc:54 Cons: 73.08%(fru)
dre-mir-138-1	ENSDART00000016327_P	ENSDARG00000004978	SINFRUG00000136689		ENSDARG00000004978 4001 (4001 nt) [SMALL EDRK RICH FACTOR 1A;] [Four F5 protein:Four F5 protein;]	1	32.84	122	SINFRUG00000136689 (fru-miR-138-1)		dre-mir-138-1 dre-mir-31		3' CGGACUAAGUGUUGUGGUCGA 5' dre-mir-138-1 __ ||||||||||.|:||:||||. __ 5' GCCUGAUUCAGAGCAUCAGCC 3' ENSDART00000016327_P E:-32.84 S:122.000000 Loc:2264 Cons: 71.43%(fru)
dre-mir-18-2b	ENSDART00000005445_P	ENSDARG00000013863	SINFRUG00000136006		ENSDARG00000013863 4001 (4001 nt) [AMBIGUOUS;] []	1	19.39	122	SINFRUG00000136006 (dre-miR-18-2b)		fru-mir-10c dre-mir-18-2b dre-mir-18-2		3' AUAGACGUGAUUUACGUGGAAU 5' dre-mir-18-2b __ ||.:|||.:|||||||||:||. __ 5' UAGUUGC-UUAAAUGCACUUUC 3' ENSDART00000005445_P E:-19.389999 S:122.000000 Loc:2553 Cons: 71.43%(fru)
dre-mir-18-2	ENSDART00000005445_P	ENSDARG00000013863	SINFRUG00000136006		ENSDARG00000013863 4001 (4001 nt) [AMBIGUOUS;] []	1	19.39	122	SINFRUG00000136006 (dre-miR-18-2)		fru-mir-10c dre-mir-18-2b dre-mir-18-2		3' AUAGACGUGAUUUACGUGGAAU 5' dre-mir-18-2 __ ||.:|||.:|||||||||:||. __ 5' UAGUUGC-UUAAAUGCACUUUC 3' ENSDART00000005445_P E:-19.389999 S:122.000000 Loc:2553 Cons: 71.43%(fru)
dre-mir-15-1a	ENSDART00000020470_P	ENSDARG00000010623	SINFRUG00000134385		ENSDARG00000010623 4001 (4001 nt) [TRANSCRIPTION FACTOR V MAF MUSCULOAPONEUROTIC FIBROSARCOMA ONCOGENE HOMOLOG;] [Maf transcription factor:Maf transcription factor;]	1	25.05	122	SINFRUG00000134385 (fru-miR-15-1a)		dre-mir-15-1a dre-mir-15-1b dre-mir-199-1c dre-mir-199-1b dre-mir-199-1a		3' GUGU-UUGGUAA-GACACGACGAU 5' dre-mir-15-1a __ |.:|.|||||||.|||||:||||. __ 5' CUUAUAACCAUUACUGUGUUGCUC 3' ENSDART00000020470_P E:-25.049999 S:122.000000 Loc:636 Cons: 70.83%(fru)
dre-mir-15-1b	ENSDART00000020470_P	ENSDARG00000010623	SINFRUG00000134385		ENSDARG00000010623 4001 (4001 nt) [TRANSCRIPTION FACTOR V MAF MUSCULOAPONEUROTIC FIBROSARCOMA ONCOGENE HOMOLOG;] [Maf transcription factor:Maf transcription factor;]	1	25.05	122	SINFRUG00000134385 (dre-miR-15-1b)		dre-mir-15-1a dre-mir-15-1b dre-mir-199-1c dre-mir-199-1b dre-mir-199-1a		3' GUGU-UUGGUAA-GACACGACGAU 5' dre-mir-15-1b __ |.:|.|||||||.|||||:||||. __ 5' CUUAUAACCAUUACUGUGUUGCUC 3' ENSDART00000020470_P E:-25.049999 S:122.000000 Loc:636 Cons: 70.83%(fru)
dre-mir-24-1	ENSDART00000013378_P	ENSDARG00000003806	SINFRUG00000144988		ENSDARG00000003806 4001 (4001 nt) [N ACETYLNEURAMINIC ACID;] [Acylneuraminate cytidylyltransferase:Acylneuraminate cytidylyltransferase;]	1	28.05	122	SINFRUG00000144988 (fru-miR-24-1)		dre-mir-24-1		3' GACAAGGACGACUUGACUCGGU 5' dre-mir-24-1 __ |||..||...|||||||||||| __ 5' CUGGGCC---UGAACUGAGCCA 3' ENSDART00000013378_P E:-28.049999 S:122.000000 Loc:2278 Cons: 78.95%(fru)
dre-mir-93	ENSDART00000021586_P	ENSDARG00000017242	SINFRUG00000145510		ENSDARG00000017242 4001 (4001 nt) [UNKNOWN; UNKNOWN; UNKNOWN;] []	1	27.18	121	SINFRUG00000145510 (dre-miR-93)		dre-mir-106-b1 dre-mir-138-1 dre-mir-20-1 dre-mir-20-1b dre-mir-205 fru-mir-205-1a dre-mir-34-3a dre-mir-34-2b dre-mir-93 fru-mir-93-1b		3' GAUGGACGUGUUUGUCGUGAAA 5' dre-mir-93 __ .|||||||||.|||||.||||| __ 5' GUACCUGCAC-AACAG-ACUUU 3' ENSDART00000021586_P E:-27.18 S:121.000000 Loc:235 Cons: 80.00%(fru)
dre-mir-let7l-a1	ENSDART00000025598_P	ENSDARG00000002936	SINFRUG00000155106		ENSDARG00000002936 4001 (4001 nt) [UNKNOWN; UNKNOWN;] [IQ calmodulin-binding region:IQ calmodulin-binding region; SEC7-like domain:SEC7-like domain; IQ calmodulin-binding region:IQ calmodulin-binding region; SEC7-like domain:SEC7-like domain;]	1	26.7	121	SINFRUG00000155106 (dre-miR-let7l-a1)		dre-mir-let7l-a1 dre-mir-let7l-a2		3' UUGGUAUGUUGGAUGAUGGAGU 5' dre-mir-let7l-a1 __ ..:|.|:|.||||::||||||| __ 5' UUUCCUGCCACCUGUUACCUCA 3' ENSDART00000025598_P E:-26.700001 S:121.000000 Loc:1157 Cons: 77.27%(fru)
dre-mir-let7l-a2	ENSDART00000025598_P	ENSDARG00000002936	SINFRUG00000155106		ENSDARG00000002936 4001 (4001 nt) [UNKNOWN; UNKNOWN;] [IQ calmodulin-binding region:IQ calmodulin-binding region; SEC7-like domain:SEC7-like domain; IQ calmodulin-binding region:IQ calmodulin-binding region; SEC7-like domain:SEC7-like domain;]	1	26.7	121	SINFRUG00000155106 (dre-miR-let7l-a2)		dre-mir-let7l-a1 dre-mir-let7l-a2		3' UUGGUAUGUUGGAUGAUGGAGU 5' dre-mir-let7l-a2 __ ..:|.|:|.||||::||||||| __ 5' UUUCCUGCCACCUGUUACCUCA 3' ENSDART00000025598_P E:-26.700001 S:121.000000 Loc:1157 Cons: 77.27%(fru)
dre-mir-101-2a	ENSDART00000010096_P	ENSDARG00000020157	SINFRUG00000141063		ENSDARG00000020157 4001 (4001 nt) [AMBIGUOUS;] [Alpha/beta hydrolase:Alpha/beta hydrolase; Epoxide hydrolase:Epoxide hydrolase; Alpha/beta hydrolase fold:Alpha/beta hydrolase fold;]	1	17.02	121	SINFRUG00000141063 (dre-miR-101-2a)		dre-mir-101-2a fru-mir-101-2b dre-mir-22-1 fru-mir-22-1a		3' GAAGUCAAUAGUAUCAUGACAU 5' dre-mir-101-2a __ :||:|..|:|::||||:||||| __ 5' UUUUA--UGUUGUAGUGCUGUA 3' ENSDART00000010096_P E:-17.02 S:121.000000 Loc:1907 Cons: 75.00%(fru)
fru-mir-101-2b	ENSDART00000010096_P	ENSDARG00000020157	SINFRUG00000141063		ENSDARG00000020157 4001 (4001 nt) [AMBIGUOUS;] [Alpha/beta hydrolase:Alpha/beta hydrolase; Epoxide hydrolase:Epoxide hydrolase; Alpha/beta hydrolase fold:Alpha/beta hydrolase fold;]	1	17.02	121	SINFRUG00000141063 (fru-miR-101-2b)		dre-mir-101-2a fru-mir-101-2b dre-mir-22-1 fru-mir-22-1a		3' GAAGUCAAUAGUAUCAUGACAU 5' fru-mir-101-2b __ :||:|..|:|::||||:||||| __ 5' UUUUA--UGUUGUAGUGCUGUA 3' ENSDART00000010096_P E:-17.02 S:121.000000 Loc:1907 Cons: 75.00%(fru)
dre-mir-139	ENSDART00000025892_P	ENSDARG00000005026	SINFRUG00000145223		ENSDARG00000005026 4001 (4001 nt) [UNKNOWN; UNKNOWN;] [Zn-finger, C2H2 type:Zn-finger, C2H2 type; Zn-finger, C2H2 type:Zn-finger, C2H2 type;]	1	21.14	121	SINFRUG00000145223 (fru-miR-139)		dre-mir-139 dre-mir-181-1b dre-mir-181-1c dre-mir-181-1a dre-mir-181-1d		3' UGACCUCUGUGUACGUGACAUCU 5' dre-mir-139 __ ..||.||.:|:|||::||||||| __ 5' UAUGCAG-UAUAUGUGCUGUAGA 3' ENSDART00000025892_P E:-21.139999 S:121.000000 Loc:991 Cons: 77.27%(fru)
dre-mir-200a-1a	ENSDART00000015522_P	ENSDARG00000017570	SINFRUG00000122021		ENSDARG00000017570 4001 (4001 nt) [AMBIGUOUS;] []	1	22.33	121	SINFRUG00000122021 (fru-miR-200a-1a)		fru-mir-10a dre-mir-10-1b dre-mir-10-1a dre-mir-200a-1a fru-mir-204-1a		3' UUUGUAGCAAUGGUCUGUCACAAUCUU 5' dre-mir-200a-1a __ |:|||.|..|:||||.|||||||:.|| __ 5' AGACA-C--UGCCAGCCAGUGUUGCAA 3' ENSDART00000015522_P E:-22.33 S:121.000000 Loc:951 Cons: 75.00%(fru)
dre-mir-20-2b	ENSDART00000015954_P	ENSDARG00000003046	SINFRUG00000130587		ENSDARG00000003046 4001 (4001 nt) [VINEXIN SH3 CONTAINING MOLECULE 1 SCAM 1; VINEXIN SH3 CONTAINING MOLECULE 1 SCAM 1; VINEXIN SH3 CONTAINING MOLECULE 1 SCAM 1; VINEXIN SH3 CONTAINING MOLECULE 1 SCAM 1;] [SH3 domain:SH3 domain; Neutrophil cytosol factor 2:Neutrophil cytosol factor 2; Sorbin-like:Sorbin-like; Neutrophil cytosol factor 2:Neutrophil cytosol factor 2; SH3 domain:SH3 domain; Proline-r…	1	21.4	121	SINFRUG00000130587 (dre-miR-20-2b)		dre-mir-106-b1 fru-mir-106-b2 dre-mir-17-1d fru-mir-17-1e dre-mir-17-1b dre-mir-20-2b dre-mir-20-1 dre-mir-20-2a dre-mir-20-1b fru-mir-30c fru-mir-93-2a		3' GAUGGACGUGACACUCGUGAAAC 5' dre-mir-20-2b __ :|||:|.|||..||||||||||. __ 5' UUACUU-CAC--UGAGCACUUUU 3' ENSDART00000015954_P E:-21.4 S:121.000000 Loc:161 Cons: 85.00%(fru)
dre-mir-20-2a	ENSDART00000015954_P	ENSDARG00000003046	SINFRUG00000130587		ENSDARG00000003046 4001 (4001 nt) [VINEXIN SH3 CONTAINING MOLECULE 1 SCAM 1; VINEXIN SH3 CONTAINING MOLECULE 1 SCAM 1; VINEXIN SH3 CONTAINING MOLECULE 1 SCAM 1; VINEXIN SH3 CONTAINING MOLECULE 1 SCAM 1;] [SH3 domain:SH3 domain; Neutrophil cytosol factor 2:Neutrophil cytosol factor 2; Sorbin-like:Sorbin-like; Neutrophil cytosol factor 2:Neutrophil cytosol factor 2; SH3 domain:SH3 domain; Proline-r…	1	21.4	121	SINFRUG00000130587 (dre-miR-20-2a)		dre-mir-106-b1 fru-mir-106-b2 dre-mir-17-1d fru-mir-17-1e dre-mir-17-1b dre-mir-20-2b dre-mir-20-1 dre-mir-20-2a dre-mir-20-1b fru-mir-30c fru-mir-93-2a		3' GAUGGACGUGACACUCGUGAAAC 5' dre-mir-20-2a __ :|||:|.|||..||||||||||. __ 5' UUACUU-CAC--UGAGCACUUUU 3' ENSDART00000015954_P E:-21.4 S:121.000000 Loc:161 Cons: 85.00%(fru)
[truncated: 12,596 more rows]
