# Supplementary material for: Human MicroRNA Targets
Source: PLoS Biol. 2004 Oct 5;2(11):e363. doi: 10.1371/journal.pbio.0020363 (PMC521178; doi:10.1371/journal.pbio.0020363)
Supplement: Table S8 — (23 KB XLS). [file pbio.0020363.st008.xls]

## Sheet: randoms (version 1).xls
		Estimate of false positives (Updates will be made available at http://www.microrna.org)..
		Transcripts with conserved target sites
		Random0-9: runs using sets of shuffled miRNAs
			All transcripts	#of transcripts with target sites=1	>=2	>=3	>=4	>=5	>=10	>=20	>=30
Real miRNAs			1947	725	1221	762	537	384	81	5	1
Random0			1029	554	475	225	129	73	9	1	0
Random1			1056	545	511	273	160	102	10	1	0
Random2			1036	530	506	247	138	79	7	0	0
Random3			1003	570	433	210	111	60	8	0	0
Random4			1036	566	470	242	131	74	10	0	0
Random5			1039	569	470	225	124	71	3	0	0
Random6			972	527	445	208	105	52	3	1	0
Random7			1046	553	493	224	120	74	10	0	0
Random8
Random9
Average over Random0-9			1027.12	551.75	475.375	231.75	127.25	73.125	7.5	0.375	0
Std Dev			27.0261	16.7822	27.5003	21.4726	17.0189	14.6037	2.9761	0.517549	0
False Pos %			0.527542	0.761034	0.389333	0.304134	0.236965	0.19043	0.0925926	0.075	0
