# Supplementary material for: Human MicroRNA Targets
Source: PLoS Biol. 2004 Oct 5;2(11):e363. doi: 10.1371/journal.pbio.0020363 (PMC521178; doi:10.1371/journal.pbio.0020363)
Supplement: Table S10 — (357 KB XLS). [file pbio.0020363.st010.xls]

## Sheet: domainstats.txt
Function of targets by Interpro and GO mapping (Updates will be made available at http://www.microrna.org).
A. Over representation of specific domains using the interpro domain classification
Interpro domain Classification	Over Representation of the domain
Homeobox protein, antennapedia type Antennapedia	5.27273
KH domain KH_dom	4
KH domain, type 1 KH_type_1	3.57895
Guanine-nucleotide dissociation stimulator CDC25 RasGRF_CDC25	3.41176
Semaphorin/CD100 antigen Sema	3.41176
Ets-domain Ets	3.05882
Armadillo repeat Armadillo	3
Cysteine-rich flanking region, N-terminal LRR_Nterm	3
Vitamin D receptor VitD_receptor	3
Zn-finger, C4-type steroid receptor Znf_C4steroid	3
protein kinase Ser_thr_pkinase	2.95652
Ligand-binding domain of nuclear hormone receptor Hormone_rec_lig	2.89655
Ubiquitin-conjugating enzymes UBQ_conjugat	2.83333
Antifreeze protein, type I Antifreeze_1	2.73684
HMG1/2 (high mobility group) box HMG_12_box	2.69697
Helix-turn-helix motif, lambda-like repressor HTH_lambrepressr	2.68293
Bromodomain Bromodomain	2.63636
Steroid hormone receptor Stdhrmn_receptor	2.60714
Cysteine-rich flanking region, C-terminal LRR_Cterm	2.5
Homeobox Homeobox	2.47244
Zn-finger-like, PHD finger Znf_PHD	2.44681
kinase Prot_kinase	2.3913
Kelch repeat Kelch_rep	2.27027
Sterile alpha motif SAM SAM	2.2
Basic-leucine zipper (bZIP) transcription factor TF_bZIP	2.17241
WW/Rsp5/WWP domain WW_Rsp5_WWP	2.17241
RNA-binding region RNP-1 (RNA recognition motif) RNA_rec_mot	2.16
Serine/Threonine protein kinase Ser_thr_pkinase	2.0578
BTB/POZ domain BTB_POZ	2.0137
Fork head transcription factor TF_Fork_head	2
Calponin-like actin-binding Calponin-like	1.90244
Zn-finger, C-x8-C-x5-C-x3-H type Znf_CCCH	1.87097
Proline-rich extensin P_rich_extensn	1.85657
region RNP-1 (RNA recognition motif) RNA_rec_mot	1.81395
Tyrosine protein kinase Tyr_pkinase	1.77206
Ras GTPase superfamily Ras_trnsfrmng	1.75789
Protein kinase Prot_kinase	1.75
Basic helix-loop-helix dimerization domain bHLH HLH_basic	1.74359
Protein kinase C, phorbol ester/diacylglycerol binding DAG_PE-bind	1.70588
RhoGAP domain RhoGAP	1.61111
Proline-rich region PRO_rich	1.60942
extensin P_rich_extensn	1.57576
Fibronectin, type III FN_III	1.53125
Pleckstrin-like PH	1.50685
Leucine-rich repeat LRR	1.49206
PDZ/DHR/GLGF domain PDZ	1.48148
Cyclin-like F-box F-box	1.44444
SH3 domain SH3	1.42105
Helicase, C-terminal Helicase_C	1.4127
Tyrosine specific protein phosphatase and dual specificity protein phosphatase TYR_phosphatase	1.32727
Zn-finger, RING Znf_ring	1.30556
DEAD/DEAH box helicase DEAD	1.2381
Cadherin Cadherin	1.23529
Zn-finger, C2H2 type Znf_C2H2	1.22171
SH2 motif SH2	1.17742
C2 domain C2	1.17105
Myb DNA-binding domain Myb_DNA_binding	1.15556
TPR repeat TPR	1.13043
ATP/GTP-binding site motif A (P-loop) ATP_GTP_A	1.10253
Bipartite nuclear localization signal NLS_BP	1.09261
Cytochrome c heme-binding site CytC_heme_bind	1.05556
G-protein beta WD-40 repeat WD40	1.04848
nuclear localization signal NLS_BP	1.03977
Neutral zinc metallopeptidases, zinc-binding region Zn_MTpeptdse	1
Aspartic acid and asparagine hydroxylation site Asx_hydroxyl	0.983051
Ion transport protein Ion_trans	0.940299
Prenyl group binding site (CAAX box) Prenyl_site	0.9
site motif A (P-loop) ATP_GTP_A	0.847619
Ig-like	0.805556
Immunoglobulin-like Ig-like	0.802632
Calcium-binding EF-hand EF-hand	0.763889
EGF-like domain EGF_like	0.745562
Ankyrin ANK	0.608333
Rhodopsin-like GPCR superfamily GPCR_Rhodpsn	0.13242
B. Over representation of specific biological functions using the GO classification
GO Classification	Over Representation of the domain
ubiquitin-protein ligase activity	3.31707
neurogenesis	3.15306
ubiquitin cycle	2.94872
calmodulin binding	2.93023
regulation of transcription from Pol II promoter	2.91429
protein-tyrosine kinase activity	2.86538
protein kinase CK2 activity	2.8
transcription factor activity	2.75207
cAMP-dependent protein kinase activity	2.68085
protein serine/threonine kinase activity	2.64935
development	2.64019
RNA polymerase II transcription factor activity	2.38182
small GTPase mediated signal transduction	2.30952
protein amino acid dephosphorylation	2.18182
cell growth and/or maintenance	2.17593
actin binding	2.1625
protein binding	2.15962
protein amino acid phosphorylation	2.14847
regulation of transcription, DNA-dependent	2.13154
GTP binding	2.07965
embryogenesis and morphogenesis	2.03704
regulation of cell cycle	2.01282
nucleus	2.00887
protein transporter activity	1.98276
RNA binding	1.97382
transcription from Pol II promoter	1.96471
transcription co-activator activity	1.96429
intracellular protein transport	1.928
cytoskeleton	1.8835
kinase activity	1.875
Golgi apparatus	1.87368
plasma membrane	1.83019
ligase activity	1.8254
kinesin complex	1.82126
DNA binding	1.78089
cell adhesion molecule activity	1.72642
magnesium ion binding	1.72131
synaptic transmission	1.63953
signal transduction	1.58961
transferase activity	1.57407
ATP binding	1.56867
intracellular signaling cascade	1.55024
potassium ion transport	1.54412
structural molecule activity	1.53922
ion transport	1.53659
cytoplasm	1.50769
nucleic acid binding	1.50685
cell proliferation	1.5
cell adhesion	1.48387
zinc ion binding	1.43023
signal transducer activity	1.40206
membrane fraction	1.28877
cell-cell signaling	1.27559
transporter activity	1.22013
membrane	1.20545
cellular_component unknown	1.16484
integral to plasma membrane	1.14797
calcium ion binding	1.14008
transport	1.13834
endoplasmic reticulum	1.1215
biological_process unknown	1.08333
molecular_function unknown	1.07799
hydrolase activity	1.01309
integral to membrane	0.905332
electron transporter activity	0.813953
metabolism	0.8
extracellular space	0.789474
electron transport	0.762162
intracellular	0.732
proteolysis and peptidolysis	0.71028
receptor activity	0.702306
C. Over representation of specific biological functions for each miRNA using the GO classification
MiRNA	GO Term	Over Representation of the domain
miR-208	transcription factor activity	6.13202
miR-19b	cell adhesion molecule activity	6.01893
miR-191	cell growth and/or maintenance	5.8376
miR-105	small GTPase mediated signal transduction	5.79506
miR-99b	structural molecule activity	5.70274
miR-213	protein-tyrosine kinase activity	5.63153
miR-129*	transcription factor activity	5.54706
miR-19b	cell adhesion	5.49
miR-190	protein binding	5.37233
miR-199a	small GTPase mediated signal transduction	5.32113
miR-144	Golgi apparatus	5.30621
miR-208	regulation of transcription, DNA-dependent	5.26065
miR-133	cell adhesion molecule activity	5.21783
miR-133a	cell adhesion molecule activity	5.21783
miR-350	protein-tyrosine kinase activity	5.21649
miR-149	cell adhesion molecule activity	5.21157
miR-98	cell adhesion molecule activity	5.21157
miR-322	Golgi apparatus	5.20668
miR-142_5p	RNA binding	5.14759
miR-155	RNA binding	5.14759
miR-199b	RNA binding	5.14759
miR-213	protein serine/threonine kinase activity	5.12584
miR-350	protein serine/threonine kinase activity	5.12584
miR-322	endoplasmic reticulum	5.08369
miR-295	electron transporter activity	5.05369
miR-295	catalytic activity	5.03187
miR-199a	protein transporter activity	4.99129
miR-350	RNA binding	4.97766
miR-126*	neurogenesis	4.9621
miR-335	Golgi apparatus	4.94364
miR-365	Golgi apparatus	4.94364
miR-7*	Golgi apparatus	4.94364
let-7d*	plasma membrane	4.91339
miR-213	plasma membrane	4.91339
miR-199a	GTP binding	4.90444
miR-199a	intracellular protein transport	4.84614
miR-95	small GTPase mediated signal transduction	4.83571
miR-365	signal transducer activity	4.83193
miR-154	electron transporter activity	4.8313
miR-149	cell adhesion	4.82015
miR-125a	neurogenesis	4.81009
miR-30b	cytoskeleton	4.80392
miR-199a	Golgi apparatus	4.79164
miR-125b	neurogenesis	4.73971
miR-7*	protein transporter activity	4.72825
let-7d*	cell adhesion molecule activity	4.697
miR-19b	calcium ion binding	4.69288
miR-154	plasma membrane	4.691
miR-133	cell adhesion	4.6889
miR-133a	cell adhesion	4.6889
miR-98	cell adhesion	4.68265
miR-199a	signal transducer activity	4.67993
miR-129*	regulation of transcription, DNA-dependent	4.67569
let-7d*	protein-tyrosine kinase activity	4.63153
miR-126*	protein-tyrosine kinase activity	4.63153
let-7d*	cell-cell signaling	4.60712
miR-126*	cell-cell signaling	4.60712
miR-7*	intracellular protein transport	4.58311
miR-125b	cytoskeleton	4.58152
miR-154	cytoskeleton	4.58152
miR-190	transcription factor activity	4.54706
miR-217	neurogenesis	4.54706
miR-291_3p	neurogenesis	4.54706
miR-294	neurogenesis	4.54706
miR-213	protein amino acid phosphorylation	4.53166
miR-350	protein amino acid phosphorylation	4.53166
miR-199b	Golgi apparatus	4.5286
miR-187	nucleic acid binding	4.52022
miR-26b	protein-tyrosine kinase activity	4.51605
miR-208	nucleus	4.51139
miR-126*	extracellular space	4.49985
miR-295	electron transport	4.49836
miR-186	small GTPase mediated signal transduction	4.47314
miR-20*	small GTPase mediated signal transduction	4.47314
miR-212	catalytic activity	4.44691
miR-136	structural molecule activity	4.4397
miR-29b	development	4.4397
miR-293	plasma membrane	4.42797
miR-140	cell growth and/or maintenance	4.42256
miR-127	small GTPase mediated signal transduction	4.42067
miR-136	signal transducer activity	4.41689
miR-333	signal transducer activity	4.41689
miR-363	signal transducer activity	4.41689
miR-137	protein serine/threonine kinase activity	4.38888
miR-292_5p	protein serine/threonine kinase activity	4.38888
miR-149	calcium ion binding	4.37096
miR-26b	protein serine/threonine kinase activity	4.33229
miR-130a	small GTPase mediated signal transduction	4.32113
miR-292_5p	small GTPase mediated signal transduction	4.32113
miR-199b	protein transporter activity	4.31321
miR-127	Golgi apparatus	4.30621
miR-15a	protein serine/threonine kinase activity	4.29577
miR-30c	protein serine/threonine kinase activity	4.29577
miR-154	electron transport	4.27596
let-7c	neurogenesis	4.25755
miR-324_5p	small GTPase mediated signal transduction	4.25074
miR-216	RNA binding	4.2407
miR-99b	RNA binding	4.2407
miR-199a	neurogenesis	4.22513
miR-216	neurogenesis	4.22513
miR-347	cytoskeleton	4.21895
miR-99b	calcium ion binding	4.21895
miR-136	protein-tyrosine kinase activity	4.21649
miR-30c	protein-tyrosine kinase activity	4.21649
miR-331	protein-tyrosine kinase activity	4.21649
miR-210	Golgi apparatus	4.20668
miR-215	Golgi apparatus	4.20668
miR-99b	Golgi apparatus	4.20668
miR-220	cell-cell signaling	4.19208
miR-219	plasma membrane	4.17643
miR-292_5p	plasma membrane	4.17643
miR-299	plasma membrane	4.17643
let-7d*	cell adhesion	4.16807
miR-199b	intracellular protein transport	4.16807
miR-340	cytoskeleton	4.16649
miR-149	neurogenesis	4.15474
miR-98	calcium ion binding	4.14856
miR-187	protein transporter activity	4.14329
let-7b	neurogenesis	4.14107
miR-29b	metabolism	4.13978
miR-29c	metabolism	4.13978
miR-133	calcium ion binding	4.1328
miR-133a	calcium ion binding	4.1328
miR-323	transporter activity	4.12932
let-7d*	protein serine/threonine kinase activity	4.12584
miR-126*	protein serine/threonine kinase activity	4.12584
miR-7*	protein serine/threonine kinase activity	4.12584
miR-32	development	4.11777
miR-99b	development	4.11777
miR-155	nucleic acid binding	4.10518
miR-218	nucleic acid binding	4.10518
miR-137	cell growth and/or maintenance	4.10063
miR-201	cell growth and/or maintenance	4.10063
miR-23a	cell growth and/or maintenance	4.10063
miR-292_5p	cell proliferation	4.10063
miR-296	cell growth and/or maintenance	4.10063
miR-299	cell growth and/or maintenance	4.10063
miR-329	cell growth and/or maintenance	4.10063
miR-7b	cell proliferation	4.10063
miR-127	protein transporter activity	4.09082
miR-197	protein transporter activity	4.09082
miR-135	neurogenesis	4.08763
miR-30d	neurogenesis	4.08763
miR-99b	endoplasmic reticulum	4.08369
miR-129	cytoskeleton	4.06695
miR-196	cytoskeleton	4.06695
miR-219	cytoskeleton	4.06695
miR-99b	cytoskeleton	4.06695
miR-15a	small GTPase mediated signal transduction	4.0581
miR-333	small GTPase mediated signal transduction	4.0581
miR-186	GTP binding	4.05645
miR-20*	membrane fraction	4.04165
miR-28	RNA binding	4.03906
miR-350	catalytic activity	4.03187
miR-125a	cell adhesion	4.01607
miR-218	mitochondrion	4.01571
let-7b	cell adhesion molecule activity	4.01347
miR-204	cell growth and/or maintenance	4.00752
miR-187	intracellular protein transport	3.99815
miR-337	protein-tyrosine kinase activity	3.9941
miR-215	protein transporter activity	3.99129
miR-211	development	3.98027
miR-141	RNA binding	3.97766
miR-186	RNA binding	3.97766
miR-187	RNA binding	3.97766
miR-19b	RNA binding	3.97766
miR-207	RNA binding	3.97766
miR-211	cell growth and/or maintenance	3.96313
miR-1	neurogenesis	3.9621
miR-19b	neurogenesis	3.9621
miR-323	neurogenesis	3.9621
miR-341	transcription factor activity	3.9621
miR-29b	hydrolase activity	3.95438
miR-15a	protein-tyrosine kinase activity	3.95345
miR-138	protein biosynthesis	3.94977
miR-127	intracellular protein transport	3.94568
miR-197	intracellular protein transport	3.94568
miR-324_3p	protein serine/threonine kinase activity	3.94527
let-7d	GTP binding	3.94097
miR-126*	signal transduction	3.93754
miR-129*	nucleus	3.92642
miR-333	plasma membrane	3.91339
miR-148	transcription factor activity	3.90963
miR-148a	transcription factor activity	3.90963
miR-130a	GTP binding	3.90444
miR-292_5p	GTP binding	3.90444
miR-143	protein serine/threonine kinase activity	3.90345
miR-216	intracellular signaling cascade	3.89703
miR-292_5p	intracellular signaling cascade	3.89703
miR-100	protein-tyrosine kinase activity	3.89456
miR-137	protein-tyrosine kinase activity	3.89456
miR-23a	protein-tyrosine kinase activity	3.89456
miR-23b	protein-tyrosine kinase activity	3.89456
miR-292_5p	protein-tyrosine kinase activity	3.89456
miR-329	protein-tyrosine kinase activity	3.89456
miR-34b	protein-tyrosine kinase activity	3.89456
miR-352	protein-tyrosine kinase activity	3.89456
miR-7b	protein-tyrosine kinase activity	3.89456
miR-330	neurogenesis	3.88409
miR-17_3p	electron transporter activity	3.88377
miR-351	catalytic activity	3.87986
miR-200a	cell adhesion	3.87857
miR-23b	cell-cell signaling	3.87015
miR-349	RNA binding	3.86218
miR-19b	structural molecule activity	3.85474
miR-30b	structural molecule activity	3.85474
miR-15a	protein amino acid phosphorylation	3.85359
miR-21	neurogenesis	3.84662
miR-322	intracellular protein transport	3.84614
miR-329	rhodopsin-like receptor activity	3.84614
miR-143	small GTPase mediated signal transduction	3.83571
miR-343	small GTPase mediated signal transduction	3.83571
miR-324_5p	GTP binding	3.83405
miR-194	nucleic acid binding	3.82508
miR-218	endoplasmic reticulum	3.82066
miR-210	neurogenesis	3.81009
miR-219	transcription factor activity	3.81009
miR-299	transcription factor activity	3.81009
miR-32	transcription factor activity	3.81009
miR-128b	catalytic activity	3.80948
miR-141	cytoskeleton	3.80392
miR-19b	cytoskeleton	3.80392
miR-137	protein amino acid phosphorylation	3.7947
miR-292_5p	protein amino acid phosphorylation	3.7947
miR-325	cell proliferation	3.79029
miR-126*	protein binding	3.78736
miR-17_3p	protein binding	3.78736
miR-323	protein binding	3.78736
miR-335	protein binding	3.78736
miR-7*	protein binding	3.78736
miR-32	nucleic acid binding	3.78326
miR-151	GTP binding	3.76694
miR-30e	structural constituent of ribosome	3.76469
miR-30e	RNA binding	3.75527
miR-344	zinc ion binding	3.74902
miR-139	neurogenesis	3.73971
miR-290	neurogenesis	3.73971
miR-30e	neurogenesis	3.73971
miR-343	neurogenesis	3.73971
miR-98	neurogenesis	3.73971
miR-26b	protein amino acid phosphorylation	3.73811
miR-127	intracellular signaling cascade	3.73353
miR-32	electron transporter activity	3.73177
miR-140	protein transporter activity	3.72825
miR-150	protein transporter activity	3.72825
miR-19b	protein transporter activity	3.72825
miR-30e	protein biosynthesis	3.72737
miR-197	Golgi apparatus	3.72125
miR-324_3p	protein-tyrosine kinase activity	3.71399
miR-136	protein serine/threonine kinase activity	3.71081
miR-331	protein serine/threonine kinase activity	3.71081
miR-187	proteolysis and peptidolysis	3.70994
miR-342	catalytic activity	3.70994
miR-20	structural molecule activity	3.70274
miR-30c	protein amino acid phosphorylation	3.70159
miR-321	cell adhesion molecule activity	3.697
miR-350	transferase activity	3.69443
miR-29c	hydrolase activity	3.69134
miR-127	plasma membrane	3.691
miR-151	zinc ion binding	3.68191
miR-190	regulation of transcription, DNA-dependent	3.67569
miR-93	RNA binding	3.65573
miR-193	small GTPase mediated signal transduction	3.64306
miR-19a	small GTPase mediated signal transduction	3.64306
miR-200c	small GTPase mediated signal transduction	3.64306
miR-204	small GTPase mediated signal transduction	3.64306
miR-333	GTP binding	3.64141
miR-16	neurogenesis	3.64017
miR-292_3p	neurogenesis	3.64017
miR-352	neurogenesis	3.64017
miR-22	electron transporter activity	3.63866
miR-10a	protein binding	3.63536
miR-30e	development	3.63235
miR-191	protein-tyrosine kinase activity	3.63153
miR-198	protein-tyrosine kinase activity	3.63153
miR-207	protein-tyrosine kinase activity	3.63153
miR-301	protein-tyrosine kinase activity	3.63153
miR-30b	protein-tyrosine kinase activity	3.63153
miR-125b	kinesin complex	3.62661
miR-185	catalytic activity	3.61683
miR-125b	cell growth and/or maintenance	3.61521
miR-127	cell growth and/or maintenance	3.61521
miR-154	cell proliferation	3.61521
miR-197	cell growth and/or maintenance	3.61521
miR-197	cell proliferation	3.61521
miR-30e	cell growth and/or maintenance	3.61521
miR-337	cell growth and/or maintenance	3.61521
miR-336	protein transporter activity	3.61277
miR-151	electron transporter activity	3.59426
let-7d	neurogenesis	3.58359
miR-140	intracellular protein transport	3.58311
miR-150	intracellular protein transport	3.58311
miR-19b	intracellular protein transport	3.58311
miR-291_3p	intracellular protein transport	3.58311
miR-294	rhodopsin-like receptor activity	3.58311
miR-344	cytoskeleton	3.58152
let-7e	neurogenesis	3.57306
miR-135	development	3.56523
miR-30d	development	3.56523
miR-343	protein binding	3.56497
miR-344	protein binding	3.56497
miR-182	RNA binding	3.56262
miR-185	RNA binding	3.56262
miR-211	kinesin complex	3.5595
miR-220	zinc ion binding	3.55638
miR-185	neurogenesis	3.54706
miR-200c	transcription factor activity	3.54706
miR-30c	neurogenesis	3.54706
miR-363	transcription factor activity	3.54706
miR-216	DNA binding	3.545
miR-292_5p	DNA binding	3.545
miR-186	cytoplasm	3.53626
miR-213	cytoplasm	3.53626
let-7d*	protein amino acid phosphorylation	3.53166
miR-126*	protein amino acid phosphorylation	3.53166
miR-7*	protein amino acid phosphorylation	3.53166
miR-193	Golgi apparatus	3.5286
miR-363	Golgi apparatus	3.5286
miR-133	integral to plasma membrane	3.52428
miR-133a	integral to plasma membrane	3.52428
miR-136	signal transduction	3.5225
miR-138	nucleic acid binding	3.52022
miR-29b	nucleic acid binding	3.52022
miR-335	nucleic acid binding	3.52022
miR-15b	protein-tyrosine kinase activity	3.51605
miR-30e	protein transporter activity	3.50586
miR-95	protein transporter activity	3.50586
miR-297	catalytic activity	3.50135
miR-30b	extracellular space	3.49985
miR-210	GTP binding	3.48941
miR-139	protein serine/threonine kinase activity	3.48841
miR-320	neurogenesis	3.48817
let-7b	cell adhesion	3.48455
miR-363	regulation of transcription, DNA-dependent	3.48305
miR-199a	intracellular signaling cascade	3.48199
miR-291_5p	RNA binding	3.47516
miR-187	small GTPase mediated signal transduction	3.47314
miR-341	small GTPase mediated signal transduction	3.47314
miR-336	intracellular protein transport	3.46763
miR-106b	transporter activity	3.46635
miR-323	transport	3.45778
miR-335	transport	3.45778
miR-17_3p	membrane fraction	3.45669
miR-329	biological_process unknown	3.45088
miR-125b	membrane	3.45034
miR-21	RNA binding	3.44715
miR-26b	RNA binding	3.44715
miR-17_3p	catalytic activity	3.44691
miR-29c	catalytic activity	3.44691
miR-136	development	3.4397
miR-140	development	3.4397
miR-199b	development	3.4397
miR-204	development	3.4397
miR-24	structural molecule activity	3.4397
miR-291_3p	development	3.4397
miR-30c	structural molecule activity	3.4397
miR-331	protein amino acid phosphorylation	3.43855
miR-204	kinesin complex	3.43397
miR-217	kinesin complex	3.43397
miR-292_5p	cell adhesion	3.43111
miR-345	mitochondrion	3.43075
miR-147	cell growth and/or maintenance	3.42256
miR-193	cell growth and/or maintenance	3.42256
miR-200c	cell proliferation	3.42256
miR-363	cell growth and/or maintenance	3.42256
miR-140*	DNA binding	3.41947
miR-127	GTP binding	3.41902
miR-139	GTP binding	3.41902
miR-343	GTP binding	3.41902
miR-147	signal transducer activity	3.41689
miR-328	plasma membrane	3.41089
miR-132	protein-tyrosine kinase activity	3.40913
miR-139	protein-tyrosine kinase activity	3.40913
miR-143	protein-tyrosine kinase activity	3.40913
miR-148	protein-tyrosine kinase activity	3.40913
miR-148a	protein-tyrosine kinase activity	3.40913
miR-324_5p	protein-tyrosine kinase activity	3.40913
miR-130a	protein transporter activity	3.40632
miR-363	endoplasmic reticulum	3.40562
miR-132	membrane fraction	3.40422
miR-29a	metabolism	3.40282
miR-213	ATP binding	3.39792
miR-29b	ATP binding	3.39792
miR-350	ATP binding	3.39792
miR-140*	transporter activity	3.39235
miR-23b	transporter activity	3.39235
miR-322	transporter activity	3.39235
miR-100	protein serine/threonine kinase activity	3.38888
miR-23b	protein serine/threonine kinase activity	3.38888
miR-26a	protein serine/threonine kinase activity	3.38888
miR-30a	protein serine/threonine kinase activity	3.38888
miR-34b	protein serine/threonine kinase activity	3.38888
miR-7b	protein serine/threonine kinase activity	3.38888
miR-154	cell-cell signaling	3.38472
miR-293	cell-cell signaling	3.38472
miR-105	neurogenesis	3.37714
miR-301	neurogenesis	3.37714
miR-321	neurogenesis	3.37714
miR-362	transcription factor activity	3.37714
miR-130a	cell adhesion molecule activity	3.37507
miR-140*	protein binding	3.37233
miR-142_5p	protein binding	3.37233
miR-204	protein binding	3.37233
miR-30a	protein binding	3.37233
miR-212	calcium ion binding	3.37096
miR-207	protein biosynthesis	3.3648
miR-30e	intracellular protein transport	3.36072
miR-95	intracellular protein transport	3.36072
miR-96	rhodopsin-like receptor activity	3.36072
miR-20*	Golgi apparatus	3.35868
miR-212	Golgi apparatus	3.35868
miR-34c	Golgi apparatus	3.35868
miR-215	regulation of transcription, DNA-dependent	3.35376
miR-219	regulation of transcription, DNA-dependent	3.35376
miR-324_3p	protein amino acid phosphorylation	3.35109
let-7a	neurogenesis	3.34543
miR-101b	RNA binding	3.34023
miR-144	RNA binding	3.34023
miR-181a	RNA binding	3.34023
miR-24	cell adhesion	3.338
miR-144	zinc ion binding	3.33399
miR-340	zinc ion binding	3.33399
miR-27b	protein serine/threonine kinase activity	3.33229
miR-130b	cytoskeleton	3.32998
miR-194	signal transducer activity	3.32943
miR-291_5p	signal transducer activity	3.32943
miR-17_3p	electron transport	3.32843
miR-181c	plasma membrane	3.32843
miR-20*	plasma membrane	3.32843
miR-224	plasma membrane	3.32843
miR-321	plasma membrane	3.32843
miR-103	neurogenesis	3.32467
miR-132	transcription factor activity	3.32467
miR-181a	transcription factor activity	3.32467
miR-343	transporter activity	3.32196
miR-10a	small GTPase mediated signal transduction	3.32113
miR-129	small GTPase mediated signal transduction	3.32113
miR-324_5p	protein serine/threonine kinase activity	3.31849
miR-19a	protein transporter activity	3.31321
miR-200c	protein transporter activity	3.31321
miR-93	protein-tyrosine kinase activity	3.3096
miR-139	protein amino acid phosphorylation	3.30927
miR-216	membrane fraction	3.30468
miR-322	membrane fraction	3.30468
miR-93	membrane fraction	3.30468
miR-24	protein serine/threonine kinase activity	3.29577
miR-153	catalytic activity	3.2949
miR-185	proteolysis and peptidolysis	3.2949
miR-220	proteolysis and peptidolysis	3.2949
let-7i	RNA binding	3.2896
miR-329	cellular_component unknown	3.28842
miR-325	kinesin complex	3.28712
miR-140	transcription factor activity	3.28403
let-7d*	DNA binding	3.28196
miR-147	cell adhesion molecule activity	3.28196
miR-220	DNA binding	3.28196
miR-154	extracellular space	3.27746
miR-30e	extracellular space	3.27746
miR-20*	development	3.26978
miR-29c	development	3.26978
miR-105	kinesin complex	3.26404
miR-20*	kinesin complex	3.26404
miR-224	kinesin complex	3.26404
miR-130a	intracellular protein transport	3.26118
miR-155	regulation of transcription, DNA-dependent	3.26065
miR-15b	calcium ion binding	3.25548
miR-126	transporter activity	3.25485
miR-181c	cell growth and/or maintenance	3.25264
miR-186	cell growth and/or maintenance	3.25264
miR-20*	cell growth and/or maintenance	3.25264
miR-151	protein serine/threonine kinase activity	3.25137
miR-181b	development	3.24706
miR-105	signal transducer activity	3.24697
miR-146	signal transducer activity	3.24697
miR-20*	signal transducer activity	3.24697
miR-362	signal transducer activity	3.24697
miR-211	protein amino acid phosphorylation	3.24216
miR-196	RNA binding	3.2407
miR-199a	RNA binding	3.2407
miR-296	RNA binding	3.2407
miR-329	RNA binding	3.2407
miR-342	RNA binding	3.2407
miR-346	RNA binding	3.2407
miR-7b	RNA binding	3.2407
miR-212	endoplasmic reticulum	3.2357
miR-125a	zinc ion binding	3.23445
miR-216	zinc ion binding	3.23445
miR-23b	zinc ion binding	3.23445
miR-34b	zinc ion binding	3.23445
miR-336	cellular_component unknown	3.23183
miR-147	GTP binding	3.22637
miR-15a	GTP binding	3.22637
miR-19a	GTP binding	3.22637
miR-200c	GTP binding	3.22637
miR-204	GTP binding	3.22637
miR-30c	GTP binding	3.22637
miR-328	protein transporter activity	3.22575
miR-215	transcription factor activity	3.22513
miR-223	neurogenesis	3.22513
miR-26a	neurogenesis	3.22513
miR-296	transcription factor activity	3.22513
miR-99b	transcription factor activity	3.22513
miR-324_5p	catalytic activity	3.22451
miR-18	cytoskeleton	3.21895
miR-199b	intracellular signaling cascade	3.21895
miR-207	cytoskeleton	3.21895
miR-333	intracellular signaling cascade	3.21895
miR-361	cytoskeleton	3.21895
miR-181a	development	3.21731
miR-24	protein-tyrosine kinase activity	3.21649
miR-324_3p	transporter activity	3.21178
miR-328	transporter activity	3.21178
miR-152	protein serine/threonine kinase activity	3.20831
miR-107	Golgi apparatus	3.20668
miR-181c	protein binding	3.2024
miR-224	protein binding	3.2024
miR-362	protein binding	3.2024
miR-292_5p	signal transduction	3.20057
miR-342	nucleic acid binding	3.19829
miR-151	small GTPase mediated signal transduction	3.18363
miR-195	small GTPase mediated signal transduction	3.18363
miR-23a	plasma membrane	3.17643
miR-32	electron transport	3.17643
miR-106b	cell proliferation	3.17463
miR-148b	RNA binding	3.17031
miR-293	RNA binding	3.17031
miR-19a	intracellular protein transport	3.16807
miR-200c	intracellular protein transport	3.16807
miR-321	cell adhesion	3.16807
miR-200a	membrane fraction	3.16718
miR-297	cell adhesion molecule activity	3.16649
miR-126	catalytic activity	3.1574
miR-148b	transcription factor activity	3.15474
miR-15a	transferase activity	3.15386
miR-127	protein binding	3.14993
miR-34a	cell growth and/or maintenance	3.14954
miR-24	RNA binding	3.14759
miR-341	protein transporter activity	3.14329
miR-362	protein transporter activity	3.14329
miR-350	metabolism	3.13978
miR-361	metabolism	3.13978
miR-325	extracellular space	3.13062
miR-29b	transporter activity	3.12932
let-7f	protein-tyrosine kinase activity	3.12903
miR-152	protein-tyrosine kinase activity	3.12903
miR-191	protein serine/threonine kinase activity	3.12584
miR-198	protein serine/threonine kinase activity	3.12584
miR-207	protein serine/threonine kinase activity	3.12584
miR-301	protein serine/threonine kinase activity	3.12584
miR-30b	protein serine/threonine kinase activity	3.12584
miR-330	RNA binding	3.12205
miR-199a*	small GTPase mediated signal transduction	3.1195
miR-10a	structural molecule activity	3.11777
miR-130a	development	3.11777
miR-199a	development	3.11777
miR-201	development	3.11777
miR-215	development	3.11777
miR-219	development	3.11777
miR-23b	development	3.11777
miR-26a	development	3.11777
miR-346	development	3.11777
miR-346	structural molecule activity	3.11777
miR-352	development	3.11777
miR-7b	development	3.11777
miR-106b	transport	3.11674
miR-136	protein amino acid phosphorylation	3.11663
miR-17_3p	cell adhesion molecule activity	3.11204
miR-18	cell adhesion molecule activity	3.11204
miR-212	cell adhesion molecule activity	3.11204
miR-224	DNA binding	3.11204
miR-23a	kinesin complex	3.11204
miR-347	cell adhesion molecule activity	3.11204
miR-99b	kinesin complex	3.11204
miR-345	transferase activity	3.10946
miR-148b	plasma membrane	3.10604
miR-291_5p	cell-cell signaling	3.10461
let-7c	RNA binding	3.10319
miR-27b	protein-tyrosine kinase activity	3.10101
miR-125a	cell growth and/or maintenance	3.10063
miR-125a	cell proliferation	3.10063
miR-129	cell growth and/or maintenance	3.10063
miR-153	cell growth and/or maintenance	3.10063
miR-153	cell proliferation	3.10063
miR-201	cell proliferation	3.10063
miR-23a	cell proliferation	3.10063
miR-346	cell growth and/or maintenance	3.10063
miR-10a	signal transducer activity	3.09496
miR-20	signal transducer activity	3.09496
miR-346	signal transducer activity	3.09496
miR-362	regulation of transcription, DNA-dependent	3.09073
let-7c	GTP binding	3.08887
miR-200a	neurogenesis	3.08763
miR-211	neurogenesis	3.08763
miR-211	transcription factor activity	3.08763
let-7b	GTP binding	3.08341
miR-22	electron transport	3.08332
miR-328	intracellular protein transport	3.08061
miR-198	development	3.07713
miR-336	biological_process unknown	3.07237
miR-183	Golgi apparatus	3.06917
miR-211	receptor activity	3.06917
miR-7	Golgi apparatus	3.06917
miR-153	cytoskeleton	3.06695
miR-26a	cytoskeleton	3.06695
miR-326	protein transporter activity	3.06529
miR-337	DNA binding	3.05957
miR-96	DNA binding	3.05957
miR-141	small GTPase mediated signal transduction	3.0581
miR-182	small GTPase mediated signal transduction	3.0581
miR-19b	small GTPase mediated signal transduction	3.0581
miR-187	GTP binding	3.05645
miR-20*	GTP binding	3.05645
miR-224	GTP binding	3.05645
miR-321	GTP binding	3.05645
miR-341	GTP binding	3.05645
miR-34c	GTP binding	3.05645
miR-204	electron transporter activity	3.05369
miR-336	cell adhesion	3.05259
miR-189	intracellular	3.0515
miR-100	protein binding	3.0504
miR-107	protein binding	3.0504
miR-199a	protein binding	3.0504
miR-216	protein binding	3.0504
miR-292_5p	protein binding	3.0504
miR-329	protein binding	3.0504
miR-34b	protein binding	3.0504
miR-292_3p	calcium ion binding	3.04903
miR-34c	intracellular signaling cascade	3.04903
miR-184	protein serine/threonine kinase activity	3.04784
miR-224	protein-tyrosine kinase activity	3.04656
let-7f	neurogenesis	3.04456
miR-142_5p	transport	3.04274
miR-30c	transport	3.04274
miR-1	membrane fraction	3.04165
miR-29b	membrane fraction	3.04165
miR-323	membrane fraction	3.04165
miR-126	plasma membrane	3.03893
miR-151	electron transport	3.03893
miR-7	plasma membrane	3.03893
miR-122a	protein serine/threonine kinase activity	3.03273
miR-30b	catalytic activity	3.03187
miR-149	cell growth and/or maintenance	3.03024
let-7e	GTP binding	3.02997
miR-339	calcium ion binding	3.02992
miR-191	cellular_component unknown	3.02538
miR-29b	cellular_component unknown	3.02538
miR-365	cellular_component unknown	3.02538
miR-15b	metabolism	3.02431
miR-133	neurogenesis	3.0235
miR-133a	neurogenesis	3.0235
miR-199a*	neurogenesis	3.0235
miR-302	neurogenesis	3.0235
miR-181c	cell-cell signaling	3.02215
miR-34c	cell-cell signaling	3.02215
miR-325	cytoskeleton	3.01964
miR-189	DNA binding	3.01893
miR-323	DNA binding	3.01893
miR-140	mitochondrion	3.01571
miR-15b	protein serine/threonine kinase activity	3.01037
miR-199a*	Golgi apparatus	3.00504
miR-103	GTP binding	3.00398
miR-27b	protein amino acid phosphorylation	3.00115
miR-18	intracellular protein transport	2.99815
miR-341	intracellular protein transport	2.99815
miR-362	intracellular protein transport	2.99815
miR-291_5p	extracellular space	2.99735
miR-196	electron transporter activity	2.9948
miR-323	membrane	2.99466
miR-107	protein transporter activity	2.99129
miR-10a	protein transporter activity	2.99129
miR-124a	protein transporter activity	2.99129
miR-129	protein transporter activity	2.99129
miR-153	protein transporter activity	2.99129
miR-210	protein transporter activity	2.99129
miR-349	nucleic acid binding	2.98971
miR-351	metabolism	2.98778
miR-135	structural molecule activity	2.98027
miR-98	protein binding	2.98001
miR-300	GTP binding	2.97844
miR-107	RNA binding	2.97766
miR-218	RNA binding	2.97766
miR-295	RNA binding	2.97766
miR-361	RNA binding	2.97766
miR-30b	immune response	2.97453
miR-210	protein serine/threonine kinase activity	2.97384
miR-100	proteolysis and peptidolysis	2.97297
miR-137	proteolysis and peptidolysis	2.97297
miR-23b	proteolysis and peptidolysis	2.97297
miR-322	proteolysis and peptidolysis	2.97297
miR-138	zinc ion binding	2.97142
miR-140	zinc ion binding	2.97142
miR-217	zinc ion binding	2.97142
miR-344	biological_process unknown	2.96546
miR-326	membrane fraction	2.96365
miR-126	cell growth and/or maintenance	2.96313
miR-135	cell proliferation	2.96313
miR-145	cell proliferation	2.96313
miR-151	cell growth and/or maintenance	2.96313
miR-1	transcription factor activity	2.9621
miR-135b	neurogenesis	2.9621
miR-140	neurogenesis	2.9621
miR-149	transcription factor activity	2.9621
miR-191	transcription factor activity	2.9621
miR-294	transcription factor activity	2.9621
miR-30b	neurogenesis	2.9621
miR-333	neurogenesis	2.9621
miR-342	transcription factor activity	2.9621
miR-214	development	2.96166
miR-129	cell adhesion molecule activity	2.96004
miR-199a	DNA binding	2.96004
miR-215	DNA binding	2.96004
miR-219	DNA binding	2.96004
miR-223	cell adhesion molecule activity	2.96004
miR-29a	DNA binding	2.96004
miR-100	transferase activity	2.95746
miR-137	transferase activity	2.95746
miR-292_5p	transferase activity	2.95746
miR-7b	transferase activity	2.95746
miR-9	signal transducer activity	2.95746
miR-136	calcium ion binding	2.95592
miR-365	hydrolase activity	2.95438
miR-224	protein amino acid phosphorylation	2.9467
miR-350	extracellular	2.9467
miR-200a	endoplasmic reticulum	2.94619
miR-139	cell adhesion	2.94568
let-7d	small GTPase mediated signal transduction	2.94262
miR-299	regulation of transcription, DNA-dependent	2.93872
miR-32	regulation of transcription, DNA-dependent	2.93872
miR-365	signal transduction	2.93754
miR-7*	signal transduction	2.93754
miR-26b	intracellular	2.93602
miR-224	nucleic acid binding	2.93526
miR-29c	nucleic acid binding	2.93526
miR-291_5p	kinesin complex	2.93147
miR-188	cytoskeleton	2.92945
miR-200a	cytoskeleton	2.92945
let-7b	calcium ion binding	2.92844
miR-190	nucleus	2.92642
miR-215	nucleus	2.92642
miR-31	protein transporter activity	2.9209
miR-343	protein transporter activity	2.9209
miR-326	intracellular protein transport	2.92014
miR-206	cell growth and/or maintenance	2.92006
miR-207	DNA binding	2.91939
miR-349	catalytic activity	2.91639
miR-28	development	2.91614
miR-28	structural molecule activity	2.91614
miR-20*	extracellular space	2.91489
miR-189	plasma membrane	2.91339
miR-211	protein binding	2.9129
miR-325	cell adhesion molecule activity	2.91273
miR-336	molecular_function unknown	2.90829
miR-34a	calcium ion binding	2.90529
miR-18	cell adhesion	2.90504
miR-107	GTP binding	2.90444
miR-10a	GTP binding	2.90444
miR-129	GTP binding	2.90444
miR-30a	GTP binding	2.90444
miR-28	nucleic acid binding	2.90355
miR-132	protein serine/threonine kinase activity	2.90345
miR-148	protein serine/threonine kinase activity	2.90345
miR-148a	protein serine/threonine kinase activity	2.90345
miR-290	protein serine/threonine kinase activity	2.90345
miR-349	DNA binding	2.90345
miR-26b	transferase activity	2.90088
miR-326	RNA binding	2.89966
miR-323	regulation of transcription, DNA-dependent	2.89808
miR-125a	intracellular signaling cascade	2.89703
miR-16	intracellular signaling cascade	2.89703
miR-7b	intracellular signaling cascade	2.89703
miR-327	structural molecule activity	2.89538
miR-124a	protein-tyrosine kinase activity	2.89456
miR-199a	protein-tyrosine kinase activity	2.89456
miR-210	protein-tyrosine kinase activity	2.89456
miR-26a	protein-tyrosine kinase activity	2.89456
miR-143	protein amino acid phosphorylation	2.89423
miR-337	protein amino acid phosphorylation	2.89423
miR-196	protein biosynthesis	2.89087
miR-20	membrane fraction	2.88965
miR-34c	small GTPase mediated signal transduction	2.88817
miR-148b	calcium ion binding	2.88553
miR-339	transcription factor activity	2.88409
miR-181a	nucleic acid binding	2.88279
miR-20*	integral to plasma membrane	2.87792
miR-213	integral to plasma membrane	2.87792
miR-181c	transport	2.87281
miR-125a	cell-cell signaling	2.87015
miR-181b	transcription factor activity	2.86899
miR-204	transcription factor activity	2.86899
miR-125b	regulation of transcription, DNA-dependent	2.86834
miR-337	regulation of transcription, DNA-dependent	2.86834
miR-96	regulation of transcription, DNA-dependent	2.86834
miR-19a	DNA binding	2.86693
miR-24	DNA binding	2.86693
miR-199a*	cytoskeleton	2.86532
miR-28	cytoskeleton	2.86532
miR-30c	transferase activity	2.86435
miR-331	transferase activity	2.86435
miR-205	RNA binding	2.86218
miR-336	RNA binding	2.86218
miR-202	protein-tyrosine kinase activity	2.85894
miR-15a	ATP binding	2.85736
miR-1	development	2.85474
miR-135b	development	2.85474
miR-138	development	2.85474
miR-189	structural molecule activity	2.85474
miR-294	development	2.85474
miR-323	development	2.85474
miR-333	development	2.85474
miR-333	structural molecule activity	2.85474
miR-350	development	2.85474
miR-195	protein transporter activity	2.85378
miR-7	protein transporter activity	2.85378
miR-140	kinesin complex	2.849
miR-205	neurogenesis	2.84662
miR-26b	neurogenesis	2.84662
miR-297	neurogenesis	2.84662
miR-349	neurogenesis	2.84662
let-7a	RNA binding	2.84642
miR-107	intracellular protein transport	2.84614
miR-10a	intracellular protein transport	2.84614
miR-124a	intracellular protein transport	2.84614
miR-129	intracellular protein transport	2.84614
miR-130a	cell adhesion	2.84614
miR-153	intracellular protein transport	2.84614
miR-210	intracellular protein transport	2.84614
miR-26a	rhodopsin-like receptor activity	2.84614
miR-200c	membrane	2.84266
miR-135b	cell proliferation	2.8376
miR-182	cell growth and/or maintenance	2.8376
miR-291_3p	cell growth and/or maintenance	2.8376
miR-291_3p	cell proliferation	2.8376
miR-294	cell proliferation	2.8376
miR-30b	cell growth and/or maintenance	2.8376
miR-323	cell growth and/or maintenance	2.8376
miR-188	protein serine/threonine kinase activity	2.83634
miR-144	small GTPase mediated signal transduction	2.83571
miR-21	protein biosynthesis	2.83429
miR-31	GTP binding	2.83405
miR-189	signal transducer activity	2.83193
miR-217	signal transducer activity	2.83193
miR-127	intracellular	2.8291
miR-128b	intracellular	2.8291
miR-21	Golgi apparatus	2.82816
miR-341	regulation of transcription, DNA-dependent	2.82769
miR-293	intracellular signaling cascade	2.82664
miR-338	RNA binding	2.82566
miR-17_5p	cell-cell signaling	2.82284
miR-151	DNA binding	2.82253
miR-7	cell adhesion molecule activity	2.82253
miR-140	endoplasmic reticulum	2.82066
miR-29c	ATP binding	2.81296
miR-223	transcription factor activity	2.81009
miR-30a	transcription factor activity	2.81009
miR-189	cytoskeleton	2.80392
miR-333	cytoskeleton	2.80392
miR-342	protein serine/threonine kinase activity	2.80392
miR-93	protein serine/threonine kinase activity	2.80392
miR-139	cellular_component unknown	2.80299
miR-344	cellular_component unknown	2.80299
miR-95	cellular_component unknown	2.80299
miR-122a	protein-tyrosine kinase activity	2.80145
miR-100	cytoplasm	2.7993
miR-215	cytoplasm	2.7993
miR-26a	cytoplasm	2.7993
miR-322	cytoplasm	2.7993
miR-15b	plasma membrane	2.79792
miR-103	DNA binding	2.79654
miR-139	DNA binding	2.79654
miR-130b	development	2.79585
miR-130b	structural molecule activity	2.79585
miR-320	development	2.79585
miR-210	protein amino acid phosphorylation	2.7947
miR-23b	protein amino acid phosphorylation	2.7947
miR-26a	protein amino acid phosphorylation	2.7947
miR-30a	protein amino acid phosphorylation	2.7947
miR-33	protein amino acid phosphorylation	2.7947
miR-34b	protein amino acid phosphorylation	2.7947
miR-352	protein amino acid phosphorylation	2.7947
miR-7b	protein amino acid phosphorylation	2.7947
miR-93	protein amino acid phosphorylation	2.7947
miR-25	neurogenesis	2.79217
miR-34c	neurogenesis	2.79217
miR-24	ATP binding	2.79024
miR-196	kinesin complex	2.79011
miR-199a*	protein transporter activity	2.78965
let-7d*	protein binding	2.78736
miR-1	protein binding	2.78736
miR-189	protein binding	2.78736
miR-186	calcium ion binding	2.78599
miR-125a	signal transduction	2.78554
miR-292_5p	nucleic acid binding	2.78326
miR-296	nucleic acid binding	2.78326
miR-346	nucleic acid binding	2.78326
miR-34b	nucleic acid binding	2.78326
miR-152	transcription factor activity	2.78153
miR-196	cell growth and/or maintenance	2.77871
miR-31	intracellular protein transport	2.77575
miR-343	intracellular protein transport	2.77575
miR-323	biological_process unknown	2.77281
miR-144	membrane	2.77227
miR-135	GTP binding	2.76694
miR-195	GTP binding	2.76694
miR-30d	GTP binding	2.76694
miR-125a	extracellular space	2.76289
miR-320	endoplasmic reticulum	2.76177
miR-139	ATP binding	2.76049
miR-28	DNA binding	2.7584
let-7c	protein-tyrosine kinase activity	2.75706
miR-188	protein-tyrosine kinase activity	2.75706
miR-211	protein-tyrosine kinase activity	2.75706
miR-30d	protein-tyrosine kinase activity	2.75706
miR-143	RNA binding	2.75527
miR-324_5p	RNA binding	2.75527
miR-337	RNA binding	2.75527
miR-343	RNA binding	2.75527
miR-344	RNA binding	2.75527
miR-198	protein amino acid phosphorylation	2.75406
miR-147	cell adhesion	2.75303
miR-154	immune response	2.75214
miR-30e	immune response	2.75214
miR-125b	zinc ion binding	2.74902
miR-96	zinc ion binding	2.74902
miR-134	plasma membrane	2.74347
miR-25	plasma membrane	2.74347
miR-34c	plasma membrane	2.74347
miR-122a	DNA binding	2.74139
miR-125b	transcription factor activity	2.73971
miR-127	transcription factor activity	2.73971
miR-128b	neurogenesis	2.73971
miR-132	neurogenesis	2.73971
miR-143	neurogenesis	2.73971
miR-144	transcription factor activity	2.73971
miR-340	transcription factor activity	2.73971
let-7d	development	2.73926
let-7d	structural molecule activity	2.73926
miR-21	structural molecule activity	2.73926
miR-26b	structural molecule activity	2.73926
miR-27b	structural molecule activity	2.73926
miR-107	small GTPase mediated signal transduction	2.73617
miR-292_3p	small GTPase mediated signal transduction	2.73617
miR-29a	small GTPase mediated signal transduction	2.73617
miR-363	nucleus	2.73378
miR-214	kinesin complex	2.73353
miR-200a	cell-cell signaling	2.73265
miR-30d	cell-cell signaling	2.73265
miR-125b	hydrolase activity	2.73199
miR-291_3p	protein transporter activity	2.72825
miR-323	protein transporter activity	2.72825
miR-333	protein transporter activity	2.72825
miR-181a	protein biosynthesis	2.72737
miR-22	metabolism	2.72475
miR-220	metabolism	2.72475
miR-363	metabolism	2.72475
miR-197	extracellular	2.72431
miR-324_5p	protein amino acid phosphorylation	2.72431
miR-206	GTP binding	2.72387
let-7d	cell growth and/or maintenance	2.72212
miR-205	cell growth and/or maintenance	2.72212
miR-26b	cell proliferation	2.72212
miR-336	cell growth and/or maintenance	2.72212
miR-132	Golgi apparatus	2.72125
miR-143	Golgi apparatus	2.72125
miR-100	transport	2.72081
miR-130a	transport	2.72081
miR-140*	transport	2.72081
miR-23b	transport	2.72081
miR-322	transport	2.72081
miR-95	signal transduction	2.71515
miR-18	RNA binding	2.71463
miR-122a	transporter activity	2.71428
miR-19a	transporter activity	2.71428
miR-24	transporter activity	2.71428
miR-30c	transporter activity	2.71428
miR-292_3p	catalytic activity	2.70994
miR-29a	catalytic activity	2.70994
miR-300	protein binding	2.70936
miR-188	intracellular protein transport	2.70864
miR-195	intracellular protein transport	2.70864
miR-19b	integral to membrane	2.70864
miR-7	intracellular protein transport	2.70864
miR-199a*	GTP binding	2.70281
miR-124a	development	2.70274
miR-30a	development	2.70274
miR-31	biological_process unknown	2.70242
miR-122a	protein amino acid phosphorylation	2.70159
miR-24	protein amino acid phosphorylation	2.70159
miR-186	DNA binding	2.697
miR-189	cell adhesion molecule activity	2.697
miR-30a	kinesin complex	2.697
miR-333	cell adhesion molecule activity	2.697
miR-335	DNA binding	2.697
miR-345	DNA binding	2.697
let-7b	cell growth and/or maintenance	2.69464
let-7d*	transferase activity	2.69443
miR-126*	transferase activity	2.69443
miR-213	transferase activity	2.69443
miR-218	transferase activity	2.69443
miR-29b	transferase activity	2.69443
miR-352	transferase activity	2.69443
miR-7*	transferase activity	2.69443
miR-122a	protein binding	2.69426
miR-363	oxidoreductase activity	2.69357
miR-143	plasma membrane	2.691
miR-144	plasma membrane	2.691
miR-337	plasma membrane	2.691
miR-340	plasma membrane	2.691
miR-24	nucleic acid binding	2.69015
let-7d	cytoskeleton	2.68844
miR-26b	cytoskeleton	2.68844
miR-297	cytoskeleton	2.68844
miR-183	RNA binding	2.68815
miR-188	RNA binding	2.68815
miR-9	RNA binding	2.68815
miR-133	membrane fraction	2.68801
miR-133a	membrane fraction	2.68801
miR-349	nucleus	2.68542
miR-300	cellular_component unknown	2.68435
miR-183	zinc ion binding	2.68191
miR-142_5p	regulation of transcription, DNA-dependent	2.67569
miR-200c	regulation of transcription, DNA-dependent	2.67569
miR-207	regulation of transcription, DNA-dependent	2.67569
miR-220	regulation of transcription, DNA-dependent	2.67569
miR-223	regulation of transcription, DNA-dependent	2.67569
miR-202	protein serine/threonine kinase activity	2.67518
miR-27b	intracellular	2.67298
miR-134	nucleic acid binding	2.67223
miR-21	protein binding	2.67189
miR-214	protein binding	2.67189
miR-34c	cell growth and/or maintenance	2.66767
miR-323	nucleus	2.66339
miR-350	nucleus	2.66339
miR-183	cytoplasm	2.6618
miR-7	cytoplasm	2.6618
miR-9	cytoplasm	2.6618
miR-137	ATP binding	2.66096
miR-216	ATP binding	2.66096
miR-292_5p	ATP binding	2.66096
miR-296	ATP binding	2.66096
miR-34b	ATP binding	2.66096
miR-7b	ATP binding	2.66096
miR-343	intracellular	2.65918
let-7e	development	2.65834
let-7e	structural molecule activity	2.65834
miR-151	protein amino acid phosphorylation	2.65719
miR-16	RNA binding	2.65573
miR-292_3p	RNA binding	2.65573
miR-34c	endoplasmic reticulum	2.65073
miR-343	transport	2.65042
miR-29a	zinc ion binding	2.64949
miR-183	nucleic acid binding	2.64575
miR-199a*	intracellular protein transport	2.64451
miR-331	small GTPase mediated signal transduction	2.64306
miR-141	GTP binding	2.64141
miR-19b	GTP binding	2.64141
miR-30b	GTP binding	2.64141
miR-29a	neurogenesis	2.64017
miR-342	neurogenesis	2.64017
miR-130b	DNA binding	2.63811
miR-297	cell adhesion	2.63756
miR-19b	intracellular signaling cascade	2.63399
miR-218	intracellular signaling cascade	2.63399
miR-223	calcium ion binding	2.63399
miR-30b	intracellular signaling cascade	2.63399
miR-322	calcium ion binding	2.63399
miR-34c	cytoskeleton	2.63399
miR-143	development	2.63235
miR-154	development	2.63235
miR-340	structural molecule activity	2.63235
miR-343	development	2.63235
miR-98	development	2.63235
miR-189	protein-tyrosine kinase activity	2.63153
miR-323	protein-tyrosine kinase activity	2.63153
miR-122a	transport	2.6277
miR-149	kinesin complex	2.62661
miR-181a	kinesin complex	2.62661
miR-22	membrane fraction	2.62661
miR-293	kinesin complex	2.62661
miR-95	kinesin complex	2.62661
miR-96	kinesin complex	2.62661
miR-145	extracellular space	2.62539
miR-194	protein serine/threonine kinase activity	2.62334
miR-105	receptor activity	2.62171
miR-130a	Golgi apparatus	2.62171
miR-292_3p	Golgi apparatus	2.62171
miR-326	transcription factor activity	2.62106
miR-147	catalytic activity	2.61683
miR-22	catalytic activity	2.61683
miR-103	cell growth and/or maintenance	2.61521
miR-128b	cell proliferation	2.61521
miR-132	cell growth and/or maintenance	2.61521
miR-139	cell proliferation	2.61521
miR-143	cell growth and/or maintenance	2.61521
miR-181a	cell growth and/or maintenance	2.61521
miR-181a	cell proliferation	2.61521
miR-290	cell proliferation	2.61521
miR-337	cell proliferation	2.61521
miR-340	cell growth and/or maintenance	2.61521
miR-152	protein amino acid phosphorylation	2.61413
miR-205	protein transporter activity	2.61277
miR-26b	protein transporter activity	2.61277
miR-349	protein transporter activity	2.61277
miR-193	cellular_component unknown	2.61035
miR-197	signal transducer activity	2.60954
miR-290	signal transducer activity	2.60954
miR-340	signal transducer activity	2.60954
miR-193	molecular_function unknown	2.60873
miR-28	transcription factor activity	2.60846
miR-302	transcription factor activity	2.60846
let-7e	cytoskeleton	2.60752
miR-217	cell-cell signaling	2.60712
miR-291_3p	cell-cell signaling	2.60712
miR-294	cell-cell signaling	2.60712
miR-30b	cell-cell signaling	2.60712
miR-299	nucleus	2.6045
miR-32	nucleus	2.6045
miR-26b	ATP binding	2.60437
miR-147	DNA binding	2.60389
miR-22	DNA binding	2.60389
miR-214	RNA binding	2.59915
miR-298	small GTPase mediated signal transduction	2.59867
let-7g	development	2.5984
miR-132	endoplasmic reticulum	2.59827
miR-290	endoplasmic reticulum	2.59827
miR-297	protein serine/threonine kinase activity	2.59533
miR-106b	membrane	2.59473
miR-292_3p	plasma membrane	2.59147
miR-342	plasma membrane	2.59147
miR-212	cell adhesion	2.58311
miR-291_3p	rhodopsin-like receptor activity	2.58311
miR-301	cell adhesion	2.58311
miR-323	intracellular protein transport	2.58311
miR-333	intracellular protein transport	2.58311
miR-347	cell adhesion	2.58311
miR-21	cell adhesion molecule activity	2.58152
miR-26b	cell adhesion molecule activity	2.58152
miR-27b	cell adhesion molecule activity	2.58152
miR-290	cytoskeleton	2.58152
let-7g	cell proliferation	2.58126
let-7g	transcription factor activity	2.58023
miR-148	nucleus	2.5785
miR-148a	nucleus	2.5785
let-7c	protein serine/threonine kinase activity	2.5733
miR-320	protein-tyrosine kinase activity	2.57263
miR-298	catalytic activity	2.57244
let-7b	protein serine/threonine kinase activity	2.56785
miR-30c	ATP binding	2.56785
miR-331	ATP binding	2.56785
miR-320	membrane fraction	2.56772
miR-195	development	2.56523
miR-103	protein binding	2.56497
miR-125b	protein binding	2.56497
miR-143	protein binding	2.56497
miR-30e	protein binding	2.56497
miR-337	protein binding	2.56497
miR-340	protein binding	2.56497
miR-96	protein binding	2.56497
miR-31	calcium ion binding	2.5636
miR-122a	RNA binding	2.56262
miR-200c	RNA binding	2.56262
miR-220	RNA binding	2.56262
let-7b	protein amino acid phosphorylation	2.55863
miR-34c	protein transporter activity	2.55833
miR-351	proteolysis and peptidolysis	2.55794
miR-193	zinc ion binding	2.55638
miR-30c	zinc ion binding	2.55638
miR-330	intracellular signaling cascade	2.55599
miR-93	integral to plasma membrane	2.55599
miR-17_3p	metabolism	2.55482
miR-207	metabolism	2.55482
miR-341	metabolism	2.55482
miR-320	cell-cell signaling	2.54822
miR-34a	endoplasmic reticulum	2.54764
miR-122a	neurogenesis	2.54706
miR-124a	transcription factor activity	2.54706
miR-142_5p	transcription factor activity	2.54706
miR-147	neurogenesis	2.54706
miR-155	transcription factor activity	2.54706
miR-15a	transcription factor activity	2.54706
miR-181b	neurogenesis	2.54706
miR-199b	transcription factor activity	2.54706
miR-19a	transcription factor activity	2.54706
miR-22	neurogenesis	2.54706
miR-220	transcription factor activity	2.54706
miR-24	neurogenesis	2.54706
miR-323	transcription factor activity	2.54706
miR-331	transcription factor activity	2.54706
miR-129	DNA binding	2.545
miR-17_3p	transporter activity	2.54435
miR-361	transporter activity	2.54435
miR-362	transporter activity	2.54435
miR-325	plasma membrane	2.54416
miR-147	calcium ion binding	2.54088
miR-17_3p	protein serine/threonine kinase activity	2.54088
miR-18	protein serine/threonine kinase activity	2.54088
miR-181c	protein serine/threonine kinase activity	2.54088
miR-224	protein serine/threonine kinase activity	2.54088
miR-150	cytoplasm	2.53626
miR-191	cytoplasm	2.53626
miR-207	cytoplasm	2.53626
miR-217	cytoplasm	2.53626
miR-130a	structural molecule activity	2.53281
miR-16	development	2.53281
miR-140	protein amino acid phosphorylation	2.53166
miR-146	protein amino acid phosphorylation	2.53166
miR-191	protein amino acid phosphorylation	2.53166
miR-207	protein amino acid phosphorylation	2.53166
miR-301	protein amino acid phosphorylation	2.53166
miR-30b	protein amino acid phosphorylation	2.53166
miR-333	protein amino acid phosphorylation	2.53166
let-7g	protein binding	2.53102
miR-199a*	electron transporter activity	2.53013
miR-194	catalytic activity	2.52937
miR-328	catalytic activity	2.52937
miR-185	Golgi apparatus	2.5286
miR-336	GTP binding	2.52593
miR-349	GTP binding	2.52593
miR-211	ATP binding	2.52345
miR-294	signal transduction	2.5225
miR-30b	signal transduction	2.5225
miR-30c	signal transduction	2.5225
miR-331	signal transduction	2.5225
miR-363	signal transduction	2.5225
let-7d*	nucleic acid binding	2.52022
miR-1	nucleic acid binding	2.52022
miR-189	nucleic acid binding	2.52022
miR-301	nucleic acid binding	2.52022
miR-133	transport	2.51918
miR-133a	transport	2.51918
miR-298	RNA binding	2.51823
let-7d	protein-tyrosine kinase activity	2.51605
miR-214	protein-tyrosine kinase activity	2.51605
miR-297	protein-tyrosine kinase activity	2.51605
miR-336	protein-tyrosine kinase activity	2.51605
miR-130a	cell proliferation	2.51567
miR-16	cell growth and/or maintenance	2.51567
miR-292_3p	cell growth and/or maintenance	2.51567
miR-292_3p	cell proliferation	2.51567
miR-29a	cell growth and/or maintenance	2.51567
miR-93	cell growth and/or maintenance	2.51567
miR-324_3p	transferase activity	2.51385
miR-140	nucleus	2.51139
miR-292_3p	signal transducer activity	2.51
miR-128b	protein transporter activity	2.50586
miR-143	protein transporter activity	2.50586
miR-144	protein transporter activity	2.50586
miR-181a	protein transporter activity	2.50586
miR-290	protein transporter activity	2.50586
miR-340	protein transporter activity	2.50586
miR-224	regulation of transcription, DNA-dependent	2.50577
miR-93	endoplasmic reticulum	2.49873
miR-181b	plasma membrane	2.49836
miR-185	plasma membrane	2.49836
miR-204	electron transport	2.49836
miR-24	plasma membrane	2.49836
let-7b	protein-tyrosine kinase activity	2.48857
miR-101b	protein serine/threonine kinase activity	2.48841
miR-96	proteolysis and peptidolysis	2.48755
miR-325	structural molecule activity	2.48551
miR-147	regulation of transcription, DNA-dependent	2.48305
miR-107	cytoskeleton	2.48199
miR-130a	cytoskeleton	2.48199
miR-34a	cell adhesion	2.48002
miR-324_5p	transcription factor activity	2.47667
miR-343	transcription factor activity	2.47667
let-7f	RNA binding	2.47516
miR-152	RNA binding	2.47516
miR-206	RNA binding	2.47516
miR-328	RNA binding	2.47516
miR-101b	cell adhesion molecule activity	2.47461
miR-125b	DNA binding	2.47461
miR-143	cell adhesion molecule activity	2.47461
miR-154	DNA binding	2.47461
miR-181a	DNA binding	2.47461
miR-197	cell adhesion molecule activity	2.47461
miR-31	DNA binding	2.47461
miR-337	cell adhesion molecule activity	2.47461
miR-340	cell adhesion molecule activity	2.47461
miR-95	DNA binding	2.47461
miR-28	regulation of transcription, DNA-dependent	2.47406
miR-198	small GTPase mediated signal transduction	2.47314
miR-139	transferase activity	2.47203
miR-143	transferase activity	2.47203
miR-133	integral to membrane	2.47048
miR-133a	integral to membrane	2.47048
miR-125a	receptor activity	2.46971
miR-291_5p	zinc ion binding	2.46891
miR-140	electron transporter activity	2.46873
miR-325	cell growth and/or maintenance	2.46837
miR-26b	intracellular protein transport	2.46763
miR-349	intracellular protein transport	2.46763
miR-217	intracellular	2.46653
miR-321	intracellular	2.46653
miR-323	intracellular	2.46653
miR-352	protein binding	2.46544
let-7c	protein amino acid phosphorylation	2.46455
miR-294	integral to plasma membrane	2.46288
miR-194	neurogenesis	2.4596
miR-206	transcription factor activity	2.4596
miR-291_5p	neurogenesis	2.4596
miR-328	neurogenesis	2.4596
let-7d*	transport	2.45778
miR-19b	transport	2.45778
miR-29b	transport	2.45778
miR-187	membrane fraction	2.45669
miR-321	membrane fraction	2.45669
miR-347	membrane fraction	2.45669
miR-214	DNA binding	2.45599
miR-184	protein amino acid phosphorylation	2.45366
miR-328	calcium ion binding	2.45342
miR-127	regulation of transcription, DNA-dependent	2.4533
miR-132	regulation of transcription, DNA-dependent	2.4533
miR-144	regulation of transcription, DNA-dependent	2.4533
miR-148	regulation of transcription, DNA-dependent	2.4533
miR-148a	regulation of transcription, DNA-dependent	2.4533
miR-148b	regulation of transcription, DNA-dependent	2.4533
miR-343	regulation of transcription, DNA-dependent	2.4533
miR-344	regulation of transcription, DNA-dependent	2.4533
miR-140*	biological_process unknown	2.45088
miR-32	biological_process unknown	2.45088
miR-346	biological_process unknown	2.45088
let-7a	cytoskeleton	2.45028
miR-324_3p	protein biosynthesis	2.44727
miR-27b	RNA binding	2.44715
miR-146	catalytic activity	2.44691
miR-150	catalytic activity	2.44691
miR-361	catalytic activity	2.44691
miR-326	nucleic acid binding	2.44222
miR-105	cellular_component unknown	2.44042
miR-29c	cellular_component unknown	2.44042
miR-147	development	2.4397
miR-15a	development	2.4397
miR-19a	development	2.4397
miR-200c	development	2.4397
miR-204	structural molecule activity	2.4397
miR-22	structural molecule activity	2.4397
miR-363	development	2.4397
miR-196	electron transport	2.43946
miR-181b	kinesin complex	2.43397
miR-193	kinesin complex	2.43397
miR-24	kinesin complex	2.43397
miR-30c	kinesin complex	2.43397
miR-129	cell adhesion	2.43111
miR-223	cell adhesion	2.43111
miR-17_3p	mitochondrion	2.43075
miR-341	mitochondrion	2.43075
miR-214	transporter activity	2.42888
miR-327	zinc ion binding	2.42709
let-7i	DNA binding	2.42398
miR-185	cell proliferation	2.42256
miR-22	cell growth and/or maintenance	2.42256
miR-331	cell growth and/or maintenance	2.42256
miR-349	cytoplasm	2.42079
miR-183	proteolysis and peptidolysis	2.42043
miR-143	GTP binding	2.41902
miR-197	GTP binding	2.41902
miR-340	GTP binding	2.41902
miR-185	signal transducer activity	2.41689
miR-15b	protein amino acid phosphorylation	2.41619
miR-34c	intracellular protein transport	2.41318
miR-140	regulation of transcription, DNA-dependent	2.41266
miR-189	regulation of transcription, DNA-dependent	2.41266
miR-132	intracellular signaling cascade	2.4116
miR-324_3p	plasma membrane	2.41089
miR-130b	electron transporter activity	2.40984
miR-195	transcription factor activity	2.40956
miR-101b	protein-tyrosine kinase activity	2.40913
miR-127	protein-tyrosine kinase activity	2.40913
miR-128b	protein-tyrosine kinase activity	2.40913
miR-144	protein-tyrosine kinase activity	2.40913
miR-197	protein-tyrosine kinase activity	2.40913
miR-290	protein-tyrosine kinase activity	2.40913
miR-340	protein-tyrosine kinase activity	2.40913
let-7d	protein binding	2.40885
let-7d	signal transduction	2.40703
miR-16	protein transporter activity	2.40632
miR-292_3p	protein transporter activity	2.40632
miR-342	protein transporter activity	2.40632
miR-93	protein transporter activity	2.40632
miR-22	endoplasmic reticulum	2.40562
miR-331	endoplasmic reticulum	2.40562
miR-211	transferase activity	2.40492
miR-21	nucleic acid binding	2.40474
miR-336	nucleic acid binding	2.40474
miR-153	metabolism	2.40282
miR-201	metabolism	2.40282
miR-346	metabolism	2.40282
let-7d*	ATP binding	2.39792
miR-126*	ATP binding	2.39792
miR-146	ATP binding	2.39792
miR-207	ATP binding	2.39792
miR-224	ATP binding	2.39792
miR-7*	ATP binding	2.39792
miR-106b	small GTPase mediated signal transduction	2.39513
miR-300	small GTPase mediated signal transduction	2.39513
miR-330	small GTPase mediated signal transduction	2.39513
miR-150	RNA binding	2.3927
miR-17_3p	RNA binding	2.3927
miR-181c	RNA binding	2.3927
miR-212	RNA binding	2.3927
miR-25	RNA binding	2.3927
miR-345	RNA binding	2.3927
miR-347	RNA binding	2.3927
miR-34c	RNA binding	2.3927
miR-23a	transporter activity	2.39235
miR-122a	cytoskeleton	2.38888
miR-124a	protein serine/threonine kinase activity	2.38888
miR-147	cytoskeleton	2.38888
miR-185	cytoskeleton	2.38888
miR-199a	protein serine/threonine kinase activity	2.38888
miR-23a	protein serine/threonine kinase activity	2.38888
miR-351	protein serine/threonine kinase activity	2.38888
miR-128a	intracellular	2.38853
miR-29a	proteolysis and peptidolysis	2.38801
miR-207	zinc ion binding	2.38645
miR-188	signal transduction	2.385
miR-101b	cell-cell signaling	2.38472
miR-103	cell-cell signaling	2.38472
miR-181a	cell-cell signaling	2.38472
miR-197	cell-cell signaling	2.38472
miR-325	cell adhesion	2.3838
miR-298	nucleic acid binding	2.38272
miR-106b	membrane fraction	2.37868
miR-216	G-protein coupled receptor protein signaling pathway	2.37851
miR-329	G-protein coupled receptor protein signaling pathway	2.37851
miR-105	transcription factor activity	2.37714
miR-146	neurogenesis	2.37714
miR-146	transcription factor activity	2.37714
miR-150	neurogenesis	2.37714
miR-361	transcription factor activity	2.37714
miR-107	cell adhesion molecule activity	2.37507
miR-130a	DNA binding	2.37507
miR-292_3p	DNA binding	2.37507
miR-320	kinesin complex	2.37507
miR-220	protein binding	2.37233
miR-30c	protein binding	2.37233
miR-138	calcium ion binding	2.37096
miR-140	calcium ion binding	2.37096
miR-218	calcium ion binding	2.37096
miR-20*	hydrolase activity	2.36942
miR-106b	catalytic activity	2.3689
miR-339	catalytic activity	2.3689
let-7e	RNA binding	2.36623
miR-17_3p	extracellular	2.36174
let-7i	intracellular signaling cascade	2.36097
miR-103	intracellular protein transport	2.36072
miR-128b	intracellular protein transport	2.36072
miR-143	intracellular protein transport	2.36072
miR-144	intracellular protein transport	2.36072
miR-181a	intracellular protein transport	2.36072
miR-293	cell adhesion	2.36072
miR-340	intracellular protein transport	2.36072
miR-98	integral to membrane	2.36072
miR-301	Golgi apparatus	2.35868
miR-321	Golgi apparatus	2.35868
miR-122a	biological_process unknown	2.35777
miR-106b	DNA binding	2.35596
let-7f	ATP binding	2.35485
miR-292_3p	regulation of transcription, DNA-dependent	2.35376
miR-296	regulation of transcription, DNA-dependent	2.35376
miR-29a	regulation of transcription, DNA-dependent	2.35376
miR-99b	regulation of transcription, DNA-dependent	2.35376
miR-297	electron transporter activity	2.35325
miR-105	signal transduction	2.35258
miR-224	signal transduction	2.35258
let-7f	development	2.35224
let-7f	structural molecule activity	2.35224
miR-194	development	2.35224
miR-194	structural molecule activity	2.35224
miR-206	development	2.35224
miR-291_5p	development	2.35224
miR-324_3p	structural molecule activity	2.35224
miR-328	development	2.35224
miR-328	structural molecule activity	2.35224
let-7f	protein amino acid phosphorylation	2.35109
miR-336	integral to plasma membrane	2.3474
miR-206	kinesin complex	2.3465
miR-145	intracellular signaling cascade	2.34448
miR-9	intracellular signaling cascade	2.34448
miR-202	protein amino acid phosphorylation	2.34404
let-7d*	nucleus	2.34146
miR-126*	nucleus	2.34146
miR-191	nucleus	2.34146
miR-224	nucleus	2.34146
miR-341	nucleus	2.34146
miR-362	nucleus	2.34146
miR-103	RNA binding	2.34023
let-7f	cell proliferation	2.3351
miR-194	cell growth and/or maintenance	2.3351
miR-291_5p	cell growth and/or maintenance	2.3351
miR-328	cell growth and/or maintenance	2.3351
miR-34c	DNA binding	2.33443
miR-34a	cell-cell signaling	2.3341
miR-103	zinc ion binding	2.33399
miR-293	metabolism	2.33243
miR-25	extracellular space	2.32993
miR-324_3p	signal transducer activity	2.32943
miR-328	signal transducer activity	2.32943
miR-212	electron transport	2.32843
miR-345	electron transport	2.32843
miR-17_5p	cell adhesion molecule activity	2.32777
let-7g	intracellular protein transport	2.32677
miR-197	transcription factor activity	2.32467
miR-337	transcription factor activity	2.32467
miR-297	development	2.32423
miR-324_5p	transporter activity	2.32196
miR-210	small GTPase mediated signal transduction	2.32113
miR-338	small GTPase mediated signal transduction	2.32113
miR-292_3p	GTP binding	2.31948
miR-148b	protein serine/threonine kinase activity	2.31849
miR-152	endoplasmic reticulum	2.31816
miR-194	endoplasmic reticulum	2.31816
miR-291_5p	endoplasmic reticulum	2.31816
let-7c	cell-cell signaling	2.31761
miR-197	cytoplasm	2.31387
miR-293	cytoplasm	2.31387
miR-181b	protein transporter activity	2.31321
miR-204	protein transporter activity	2.31321
miR-22	protein transporter activity	2.31321
miR-342	intracellular signaling cascade	2.31206
miR-28	nucleus	2.30975
miR-16	protein-tyrosine kinase activity	2.3096
miR-342	protein-tyrosine kinase activity	2.3096
miR-132	protein amino acid phosphorylation	2.30927
miR-148	protein amino acid phosphorylation	2.30927
miR-148a	protein amino acid phosphorylation	2.30927
miR-290	protein amino acid phosphorylation	2.30927
miR-140*	nucleus	2.30493
miR-125a	membrane fraction	2.30468
miR-153	membrane fraction	2.30468
miR-223	membrane fraction	2.30468
miR-346	membrane fraction	2.30468
miR-351	membrane fraction	2.30468
let-7c	development	2.3022
let-7f	cytoskeleton	2.30142
miR-206	cytoskeleton	2.30142
miR-328	cytoskeleton	2.30142
miR-149	oxidoreductase activity	2.30125
miR-132	signal transduction	2.30011
miR-139	signal transduction	2.30011
miR-106b	neurogenesis	2.29913
miR-128a	neurogenesis	2.29913
miR-128a	transcription factor activity	2.29913
miR-149	nucleic acid binding	2.29783
miR-154	nucleic acid binding	2.29783
miR-337	nucleic acid binding	2.29783
miR-344	nucleic acid binding	2.29783
miR-349	regulation of transcription, DNA-dependent	2.29718
miR-140*	catalytic activity	2.2949
miR-193	proteolysis and peptidolysis	2.2949
miR-200c	integral to membrane	2.2936
miR-30d	cell adhesion	2.2936
miR-7	cell adhesion	2.2936
miR-105	integral to plasma membrane	2.29295
miR-224	integral to plasma membrane	2.29295
miR-34a	RNA binding	2.2896
miR-181a	nucleus	2.28899
miR-23a	cellular_component unknown	2.28842
miR-292_3p	cellular_component unknown	2.28842
miR-352	cellular_component unknown	2.28842
let-7a	GTP binding	2.28777
miR-32	molecular_function unknown	2.2868
miR-7b	molecular_function unknown	2.2868
miR-152	protein binding	2.28486
miR-206	protein binding	2.28486
miR-124a	DNA binding	2.28196
miR-155	DNA binding	2.28196
miR-185	DNA binding	2.28196
miR-199b	DNA binding	2.28196
miR-204	cell adhesion molecule activity	2.28196
miR-24	cell adhesion molecule activity	2.28196
miR-291_3p	DNA binding	2.28196
miR-30c	DNA binding	2.28196
miR-363	DNA binding	2.28196
miR-136	transferase activity	2.27939
miR-155	transferase activity	2.27939
miR-30a	transferase activity	2.27939
let-7a	protein-tyrosine kinase activity	2.27789
miR-103	electron transport	2.27596
miR-105	development	2.26978
miR-134	development	2.26978
miR-146	development	2.26978
miR-224	development	2.26978
miR-341	development	2.26978
miR-361	development	2.26978
miR-361	structural molecule activity	2.26978
miR-362	development	2.26978
miR-298	protein transporter activity	2.26882
miR-126	metabolism	2.26531
miR-200a	metabolism	2.26531
miR-17_3p	kinesin complex	2.26404
miR-18	kinesin complex	2.26404
miR-29c	kinesin complex	2.26404
miR-321	kinesin complex	2.26404
miR-326	nucleus	2.26346
miR-325	protein-tyrosine kinase activity	2.26229
miR-16	intracellular protein transport	2.26118
miR-292_3p	intracellular protein transport	2.26118
miR-292_3p	rhodopsin-like receptor activity	2.26118
miR-342	intracellular protein transport	2.26118
miR-93	intracellular protein transport	2.26118
miR-327	cytoskeleton	2.2596
miR-204	membrane	2.25769
miR-220	membrane	2.25769
miR-291_3p	membrane	2.25769
miR-331	membrane	2.25769
miR-363	membrane	2.25769
miR-17_5p	membrane fraction	2.25738
miR-145	transporter activity	2.25485
miR-18	cell growth and/or maintenance	2.25264
miR-198	cell proliferation	2.25264
miR-207	cell growth and/or maintenance	2.25264
miR-321	cell growth and/or maintenance	2.25264
miR-145	protein serine/threonine kinase activity	2.25137
miR-211	protein serine/threonine kinase activity	2.25137
miR-30d	protein serine/threonine kinase activity	2.25137
miR-7	protein serine/threonine kinase activity	2.25137
miR-293	small GTPase mediated signal transduction	2.25074
miR-31	small GTPase mediated signal transduction	2.25074
miR-106b	plasma membrane	2.25043
miR-300	plasma membrane	2.25043
miR-19a	nucleus	2.24835
miR-200c	nucleus	2.24835
miR-220	nucleus	2.24835
miR-145	cytoplasm	2.24676
miR-188	cytoplasm	2.24676
miR-103	electron transporter activity	2.24634
miR-128b	electron transporter activity	2.24634
miR-202	DNA binding	2.24634
miR-337	electron transporter activity	2.24634
miR-139	intracellular	2.24414
miR-30e	intracellular	2.24414
miR-188	protein amino acid phosphorylation	2.24216
miR-10a	RNA binding	2.2407
miR-124a	RNA binding	2.2407
miR-129	RNA binding	2.2407
miR-153	RNA binding	2.2407
miR-20	RNA binding	2.2407
miR-223	RNA binding	2.2407
miR-26a	RNA binding	2.2407
miR-351	RNA binding	2.2407
miR-132	integral to plasma membrane	2.24049
miR-124a	immune response	2.23757
miR-125b	transport	2.23538
miR-139	transport	2.23538
miR-98	transport	2.23538
miR-343	nucleus	2.23455
miR-129	zinc ion binding	2.23445
miR-26a	zinc ion binding	2.23445
miR-346	zinc ion binding	2.23445
miR-31	membrane fraction	2.23429
miR-34a	DNA binding	2.23134
miR-188	nucleic acid binding	2.23072
let-7b	protein binding	2.22937
miR-24	GTP binding	2.22637
miR-331	GTP binding	2.22637
miR-291_5p	protein transporter activity	2.22575
miR-324_3p	protein transporter activity	2.22575
let-7e	transcription factor activity	2.22513
miR-124a	neurogenesis	2.22513
miR-125a	transcription factor activity	2.22513
miR-129	transcription factor activity	2.22513
miR-130a	transcription factor activity	2.22513
miR-153	transcription factor activity	2.22513
miR-216	transcription factor activity	2.22513
miR-23b	transcription factor activity	2.22513
miR-26a	transcription factor activity	2.22513
miR-29a	transcription factor activity	2.22513
miR-30a	neurogenesis	2.22513
miR-320	transcription factor activity	2.22513
miR-33	transcription factor activity	2.22513
miR-338	neurogenesis	2.22513
miR-346	transcription factor activity	2.22513
miR-351	neurogenesis	2.22513
miR-293	catalytic activity	2.22451
miR-150	cytoskeleton	2.21895
miR-100	hydrolase activity	2.21741
miR-137	hydrolase activity	2.21741
miR-23a	hydrolase activity	2.21741
miR-23b	hydrolase activity	2.21741
miR-296	hydrolase activity	2.21741
miR-29a	hydrolase activity	2.21741
miR-322	hydrolase activity	2.21741
miR-152	ATP binding	2.21735
miR-324_3p	ATP binding	2.21735
let-7g	small GTPase mediated signal transduction	2.2168
miR-204	protein-tyrosine kinase activity	2.21649
miR-151	regulation of transcription, DNA-dependent	2.21626
miR-195	regulation of transcription, DNA-dependent	2.21626
miR-342	cytoplasm	2.21434
miR-352	cytoplasm	2.21434
miR-124a	protein biosynthesis	2.2128
miR-30a	protein biosynthesis	2.2128
miR-101b	kinesin complex	2.21157
miR-343	DNA binding	2.21157
miR-153	extracellular	2.20973
miR-342	protein amino acid phosphorylation	2.20973
miR-351	extracellular	2.20973
miR-324_3p	proteolysis and peptidolysis	2.20744
miR-34a	membrane	2.20707
miR-124a	Golgi apparatus	2.20668
miR-140	receptor activity	2.20668
miR-140*	Golgi apparatus	2.20668
miR-338	Golgi apparatus	2.20668
miR-146	protein binding	2.2024
miR-150	protein binding	2.2024
miR-186	protein binding	2.2024
miR-207	protein binding	2.2024
miR-301	protein binding	2.2024
miR-341	protein binding	2.2024
miR-345	protein binding	2.2024
miR-100	signal transduction	2.20057
miR-199a	signal transduction	2.20057
miR-20	signal transduction	2.20057
miR-210	signal transduction	2.20057
miR-223	signal transduction	2.20057
miR-23b	signal transduction	2.20057
miR-30a	signal transduction	2.20057
miR-346	signal transduction	2.20057
miR-93	signal transduction	2.20057
miR-16	nucleic acid binding	2.19829
miR-352	nucleic acid binding	2.19829
miR-93	nucleic acid binding	2.19829
let-7i	electron transporter activity	2.19571
miR-24	cellular_component unknown	2.19531
miR-324_3p	cell adhesion molecule activity	2.1945
miR-328	cell adhesion molecule activity	2.1945
miR-352	integral to membrane	2.19407
let-7a	transcription factor activity	2.19342
miR-106b	development	2.19178
miR-106b	structural molecule activity	2.19178
miR-128a	development	2.19178
miR-326	development	2.19178
miR-330	development	2.19178
miR-330	structural molecule activity	2.19178
miR-339	development	2.19178
miR-133	transporter activity	2.19072
miR-133a	transporter activity	2.19072
miR-124a	nucleus	2.18946
miR-129	nucleus	2.18946
miR-201	nucleus	2.18946
miR-219	nucleus	2.18946
miR-223	nucleus	2.18946
miR-292_5p	nucleus	2.18946
miR-296	nucleus	2.18946
miR-33	nucleus	2.18946
miR-342	nucleus	2.18946
miR-99b	nucleus	2.18946
miR-1	biological_process unknown	2.18785
miR-182	biological_process unknown	2.18785
miR-189	biological_process unknown	2.18785
miR-191	biological_process unknown	2.18785
miR-350	biological_process unknown	2.18785
miR-361	biological_process unknown	2.18785
miR-17_5p	zinc ion binding	2.18714
miR-300	kinesin complex	2.18604
miR-145	small GTPase mediated signal transduction	2.18363
miR-183	small GTPase mediated signal transduction	2.18363
miR-188	small GTPase mediated signal transduction	2.18363
miR-9	small GTPase mediated signal transduction	2.18363
miR-330	nucleic acid binding	2.17919
let-7a	protein amino acid phosphorylation	2.17803
miR-140*	plasma membrane	2.17643
miR-210	plasma membrane	2.17643
miR-338	plasma membrane	2.17643
miR-143	ATP binding	2.17553
miR-148	ATP binding	2.17553
miR-148a	ATP binding	2.17553
miR-181a	ATP binding	2.17553
miR-106b	cell growth and/or maintenance	2.17463
miR-128a	cell growth and/or maintenance	2.17463
miR-128a	cell proliferation	2.17463
miR-300	cell growth and/or maintenance	2.17463
miR-326	cell growth and/or maintenance	2.17463
miR-339	cell growth and/or maintenance	2.17463
miR-339	cell proliferation	2.17463
miR-149	RNA binding	2.17031
miR-31	RNA binding	2.17031
miR-106b	signal transducer activity	2.16897
miR-181b	intracellular protein transport	2.16807
miR-182	cell adhesion	2.16807
miR-189	cell adhesion	2.16807
miR-198	cell adhesion	2.16807
miR-204	intracellular protein transport	2.16807
miR-22	intracellular protein transport	2.16807
miR-291_3p	cell adhesion	2.16807
miR-333	cell adhesion	2.16807
miR-30d	membrane fraction	2.16718
miR-325	cytoplasm	2.16703
miR-133	nucleic acid binding	2.16659
miR-133a	nucleic acid binding	2.16659
miR-302	nucleic acid binding	2.16659
miR-327	protein serine/threonine kinase activity	2.16649
miR-148b	zinc ion binding	2.16406
miR-343	zinc ion binding	2.16406
miR-15b	transferase activity	2.16391
miR-27b	transferase activity	2.16391
miR-124a	regulation of transcription, DNA-dependent	2.16112
miR-293	neurogenesis	2.15474
miR-325	signal transduction	2.15327
miR-302	regulation of transcription, DNA-dependent	2.15213
miR-17_5p	nucleic acid binding	2.15099
miR-151	cellular_component unknown	2.15091
miR-30d	molecular_function unknown	2.1493
miR-7	molecular_function unknown	2.1493
miR-125b	calcium ion binding	2.14856
miR-181a	calcium ion binding	2.14856
miR-149	hydrolase activity	2.14702
miR-130a	electron transporter activity	2.1468
miR-130a	intracellular	2.14461
miR-188	DNA binding	2.14446
miR-18	protein transporter activity	2.14329
miR-207	protein transporter activity	2.14329
miR-149	protein biosynthesis	2.14241
miR-98	protein biosynthesis	2.14241
miR-15b	membrane	2.14222
miR-137	integral to plasma membrane	2.14095
miR-20	integral to plasma membrane	2.14095
miR-23b	integral to plasma membrane	2.14095
miR-300	cytoskeleton	2.14095
miR-320	integral to plasma membrane	2.14095
miR-339	cytoskeleton	2.14095
miR-141	metabolism	2.13978
miR-15a	metabolism	2.13978
miR-30b	metabolism	2.13978
miR-324_3p	GTP binding	2.13891
miR-330	nucleus	2.13793
let-7d	cell proliferation	2.13716
let-7b	transferase activity	2.13643
miR-293	Golgi apparatus	2.13629
miR-31	Golgi apparatus	2.13629
miR-343	Golgi apparatus	2.13629
miR-16	transport	2.13585
miR-325	DNA binding	2.13512
miR-22	transcription factor activity	2.13202
let-7d	signal transducer activity	2.13149
miR-194	intracellular signaling cascade	2.13149
miR-31	signal transduction	2.13019
miR-135b	transporter activity	2.12932
miR-15a	transporter activity	2.12932
miR-328	protein-tyrosine kinase activity	2.12903
miR-141	protein serine/threonine kinase activity	2.12584
miR-189	protein serine/threonine kinase activity	2.12584
miR-333	protein serine/threonine kinase activity	2.12584
miR-106b	protein binding	2.1244
miR-184	protein binding	2.1244
miR-220	cytoplasm	2.12123
let-7g	neurogenesis	2.1208
[truncated: 2,941 more rows]
