# Supplementary material for: Human MicroRNA Targets
Source: PLoS Biol. 2004 Oct 5;2(11):e363. doi: 10.1371/journal.pbio.0020363 (PMC521178; doi:10.1371/journal.pbio.0020363)
Supplement: Table S11 — (529 KB XLS). [file pbio.0020363.st011.xls]

## Sheet: cpe_hits.txt
							Target genes that contain predicted CPE motifs(Updates will be made available at http://www.microrna.org).
Human Transcript	Human Gene	HUGO	CPE	G-quartet location for FMRP genes	Mouse Orthologue	Rat Orthologue	Annotation [Domains]	Total Conserved Hits	Total Energy (kcal/mol)	Total Score	Mouse Transcript (miRNA)	Rat Transcript (miRNA)	All miRNAs	miRNAs (non overlapping)	GO Terms	Alignments
ENST00000324210	ENSG00000152601	MBNL1	1		ENSMUSG00000027763	ENSRNOG00000014076	MUSCLEBLIND-LIKE PROTEIN (TRIPLET-EXPANSION RNA-BINDING PROTEIN). [Source:SWISSPROT;Acc:Q9NR56] ENSG00000152601 (1) (153307166 153338892 153498025 153504477 153873646) 3413 (3413 nt) HUGO:6923:KIAA0428 MBNL [IPR000571:Zn-finger, C-x8-C-x5-C-x3-H type;]	16	-313.37	1622	ENSMUSG00000027763 (mmu-let-7a)	ENSRNOG00000014076 (mmu-let-7a)	hsa-let-7a hsa-let-7e hsa-mir-103 hsa-mir-106b hsa-mir-107 hsa-mir-126 hsa-mir-130b hsa-mir-134 hsa-mir-149 hsa-mir-152 hsa-mir-18 hsa-mir-187 hsa-mir-19b hsa-mir-194 hsa-mir-199b hsa-mir-199a hsa-mir-218 hsa-mir-220 mmu-mir-298 hsa-mir-301 rno-mir-325 rno-mir-327 hsa-mir-34a rno-mir-342 rno-mir-349	hsa-mir-103 hsa-mir-301 hsa-mir-152 hsa-mir-199b hsa-mir-106b rno-mir-325 103 hsa-mir-34a hsa-mir-149 rno-mir-349 rno-mir-327 hsa-mir-194 94 hsa-mir-134 hsa-mir-18 hsa-mir-126	0003676 nucleic acid binding IEA; 0003723 RNA binding IEA; 0005634 nucleus IEA;	3' AGUAUCGGGA--CAUGUUACGACGA 5' hsa-mir-103 __ ||||:||::|..||||.|||:||:| __ 5' UCAUGGCUUUAAGUACCAUGUUGUU 3' ENST00000324210 E:-23.85 S:123.000000 Loc:623 Cons: %(mmu) 92.00%(rno)	3' CGAAACUGUUAUGA-UAACGUGAC 5' hsa-mir-301 __ |:.||||:..||||.||||:|||| __ 5' GUGUUGAUUUUACUGAUUGUACUG 3' ENST00000324210 E:-21.709999 S:118.000000 Loc:1587 Cons: 91.67%(mmu) 95.83%(rno)	3' GGUUC-AAGACAGUACGUGACU 5' hsa-mir-152 __ |||.|.||||.|:|||:|:||: __ 5' CCAUGAUUCUAUUAUGUAUUGG 3' ENST00000324210 E:-18.93 S:112.000000 Loc:362 Cons: 95.45%(mmu) %(rno)	3' CUUGUCUAUCAGAUUUGUG-ACCC 5' hsa-mir-199b __ .|.::|:|:|.:|||::||.|||| __ 5' AAUUGGGUGGGUUAAGUACAUGGG 3' ENST00000324210 E:-21.09 S:106.000000 Loc:1220 Cons: 95.83%(mmu) 95.83%(rno)	3' UAGACGUGAC-AGUCGUGAA-AU 5' hsa-mir-106b __ .|:|||.|||.||||||.||.|| __ 5' UUUUGCUCUGUUCAGCAGUUCUA 3' ENST00000324210 E:-18.6 S:104.000000 Loc:1421 Cons: 91.30%(mmu) 91.30%(rno)	3' UGU-GAAUGACUCGUGGAUGAUCC 5' rno-mir-325 __ |||.:||::||..:|::|:||||. __ 5' ACAUUUUGUUGCAUAUUUGCUAGU 3' ENST00000324210 E:-17.27 S:103.000000 Loc:724 Cons: 91.67%(mmu) %(rno)	3' UGAUAUGUUG-GAGG-AUGGAGU 5' hsa-let-7e __ ::||||.|||.:|||.|||:||. __ 5' GUUAUAGAACUUUCCAUACUUCC 3' ENST00000324210 E:-17.790001 S:100.000000 Loc:1509 Cons: 91.30%(mmu) %(rno)	3' UGUUGGUCGAUUCUGUGACGGU 5' hsa-mir-34a __ ::||..||:||||.:::|||:| __ 5' GUAAGAAGUUAAGUUGUUGCUA 3' ENST00000324210 E:-17.92 S:100.000000 Loc:2081 Cons: 100.00%(mmu) %(rno)	3' CCUCACUUCUGUGCCUCGGUCU 5' hsa-mir-149 __ ..:|||||..||:|||.:|||| __ 5' AAGGUGAAAUCAUGGA-UCAGA 3' ENST00000324210 E:-23.85 S:98.000000 Loc:2773 Cons: 90.48%(mmu) %(rno)	3' UCUCCAAUUCUGUCGUCCCGAC 5' rno-mir-349 __ |||||..|:|||||::.|.:|| __ 5' AGAGGAAAGGACAGUGUGCUUG 3' ENST00000324210 E:-22.75 S:96.000000 Loc:28 Cons: 100.00%(mmu) %(rno)	3' UGGGAGUACGGGGAGUUCC 5' rno-mir-327 __ |..:|:||.:|::|||||| __ 5' AAGUUUAUUUCUUUCAAGG 3' ENST00000324210 E:-18.42 S:95.000000 Loc:422 Cons: 100.00%(mmu) %(rno)	3' AGGUGUACCUCAACGACAAUGU 5' hsa-mir-194 __ .::|||.||||||.:|||||.: __ 5' AUUACAAGGAGUU-UUGUUAAG 3' ENST00000324210 E:-18.77 S:94.000000 Loc:2520 Cons: 100.00%(mmu) %(rno)	3' UUGAUAUGUUGGAUGAUGGAGU 5' hsa-let-7a __ .|||:||:|||.|::||.:||| __ 5' UACUGUAUAACAUGUUA-UUCA 3' ENST00000324210 E:-17.209999 S:94.000000 Loc:956 Cons: 95.24%(mmu) 95.24%(rno)	3' GGGAGACCAGUUGGUCAGUGU 5' hsa-mir-134 __ :.:|.|.||.|:::|||:||| __ 5' UGUUAUUGU-AGUUAGUUACA 3' ENST00000324210 E:-18.82 S:94.000000 Loc:1706 Cons: %(mmu) 100.00%(rno)	3' AUAGAC-GUGAUCUACGUGGAAU 5' hsa-mir-18 __ ...|||.||:.|||||||:..|| __ 5' GCACUGUCAUCAGAUGCAUGAUA 3' ENST00000324210 E:-17.299999 S:93.000000 Loc:1159 Cons: 95.65%(mmu) 95.65%(rno)	3' CGUAAUAAUG-AGUGCCAUGCU 5' hsa-mir-126 __ ..||||||||.|:||||..:|: __ 5' AGAUUAUUACAUUACGGGUUGG 3' ENST00000324210 E:-19.09 S:92.000000 Loc:1631 Cons: 95.45%(mmu) 95.45%(rno)
ENST00000311910	ENSG00000087152		1		ENSMUSG00000034751	ENSRNOG00000020930	ENSG00000087152 (-1) (42744339 42746796 42750591 42750591 42729985) 2457 (2457 nt) []	15	-322.95	1506	ENSMUSG00000034751 (mmu-miR-125b)	ENSRNOG00000020930 (mmu-miR-107)	hsa-mir-107 hsa-mir-125b hsa-mir-125a hsa-mir-15b hsa-mir-154 hsa-mir-17_5p hsa-mir-188 hsa-mir-189 hsa-mir-193 mmu-mir-202 hsa-mir-204 hsa-mir-21 hsa-mir-212 hsa-mir-23a hsa-mir-26a hsa-mir-27a hsa-mir-296 rno-mir-326 rno-mir-328 rno-mir-330 rno-mir-336 rno-mir-339 rno-mir-343 hsa-mir-361	hsa-mir-204 hsa-mir-193 hsa-mir-107 hsa-mir-15b hsa-mir-125b hsa-mir-188 rno-mir-326 hsa-mir-27a hsa-mir-212 rno-mir-336 hsa-mir-23a hsa-mir-154 mmu-mir-202 hsa-mir-189 hsa-mir-21		3' UCCGUAUCCUACUGUUUCCCUU 5' hsa-mir-204 __ .|||||||..||:||||.|||. __ 5' UGGCAUAGCCUGGCAAAUGGAC 3' ENST00000311910 E:-22.18 S:112.000000 Loc:61 Cons: 90.91%(mmu) 90.91%(rno)	3' GACCC--UGAAACAUCCGGUCAA 5' hsa-mir-193 __ :||||..:|||.||:||||||.. __ 5' UUGGGAAGCUUGGUGGGCCAGGC 3' ENST00000311910 E:-27.4 S:110.000000 Loc:101 Cons: 91.30%(mmu) %(rno)	3' ACUAUCGGGACAUGUUACGACGA 5' hsa-mir-107 __ |||.||....|.||::||||||| __ 5' UGAGAG---GGAACGGUGCUGCU 3' ENST00000311910 E:-19.030001 S:107.000000 Loc:806 Cons: %(mmu) 90.00%(rno)	3' ACAUUUGGU-A-CUACACGACGAU 5' hsa-mir-15b __ |||:|:::|.|.|||||.|.|||| __ 5' UGUGAGUUACUGGAUGUCCAGCUA 3' ENST00000311910 E:-17.190001 S:105.000000 Loc:267 Cons: 91.67%(mmu) 91.67%(rno)	3' AGUGUUCAAUCCCAG-AGUCCCU 5' hsa-mir-125b __ .|:||.|.|:|||||.|::|||: __ 5' CCGCAUGCUGGGGUCAUUGGGGG 3' ENST00000311910 E:-25.76 S:104.000000 Loc:2285 Cons: 95.65%(mmu) 95.65%(rno)	3' UGGGAGGUGGU-ACGUUCCCUAC 5' hsa-mir-188 __ |.||||:||.:.|.|||||.||| __ 5' AGCCUCUACAGCUUCAAGGAAUG 3' ENST00000311910 E:-22.780001 S:103.000000 Loc:690 Cons: 95.65%(mmu) 95.65%(rno)	3' UGACCUCC--UUCCCGGGUCUCC 5' rno-mir-326 __ |||.|.||...:||||:|.|||| __ 5' ACUUGUGGUUUGGGGCUCUGAGG 3' ENST00000311910 E:-25.889999 S:101.000000 Loc:1065 Cons: 91.30%(mmu) 91.30%(rno)	3' CCGCCUUGAAUCGGUGACACUU 5' hsa-mir-27a __ |||..:||.|:|.|||||||.. __ 5' GGCCUGACCUGGGCACUGUGCC 3' ENST00000311910 E:-20.58 S:99.000000 Loc:298 Cons: %(mmu) 95.45%(rno)	3' CCGGCACU-GACCUCUGACAAU 5' hsa-mir-212 __ ..|:|||:.||.||||:|.||| __ 5' UCCUGUGGUCUUGAGAUUUUUA 3' ENST00000311910 E:-17.469999 S:98.000000 Loc:2330 Cons: 95.45%(mmu) 95.45%(rno)	3' UCUGAUCUAUACCUUCCCACU 5' rno-mir-336 __ .||.|:.:|:|||::||||.. __ 5' UGAGUGUGUGUGGGGGGGUUC 3' ENST00000311910 E:-20.959999 S:98.000000 Loc:2182 Cons: 90.48%(mmu) %(rno)	3' CCUUUAGGGACCGUUACACUA 5' hsa-mir-23a __ ||..:.||:..|||||||||. __ 5' GGCCGCCCUCAGCAAUGUGAA 3' ENST00000311910 E:-20.450001 S:96.000000 Loc:430 Cons: 95.24%(mmu) 95.24%(rno)	3' GCUUCCGUUGUGCCUAUUGGAU 5' hsa-mir-154 __ :|::.||||...|||||:|||. __ 5' UGGGUGCAA--GGGAUAGCCUU 3' ENST00000311910 E:-21.280001 S:96.000000 Loc:2 Cons: 100.00%(mmu) %(rno)	3' AGAAGGGUACGCGA-UAUGGAGA 5' mmu-mir-202 __ ||.||:||.|||||..|:||||. __ 5' UCCUCUCA-GCGCUCCUGCCUCC 3' ENST00000311910 E:-23.08 S:93.000000 Loc:993 Cons: %(mmu) 90.91%(rno)	3' UGACUAUAGUCGAGU-CAUCCGUG 5' hsa-mir-189 __ |.||.|:||.|||.|.||:|||:: __ 5' AGUGCUGUCUGCUGAGGUGGGCGU 3' ENST00000311910 E:-21.48 S:93.000000 Loc:550 Cons: %(mmu) 91.67%(rno)	3' AGUUGUAGUCAGAC-UAUUCGAU 5' hsa-mir-21 __ .:||||.|||.|||.:|::|:|. __ 5' CUAACAGCAGGCUGUGUGGGUUU 3' ENST00000311910 E:-17.42 S:91.000000 Loc:2105 Cons: 95.65%(mmu) 95.65%(rno)
ENST00000331376_P	ENSG00000185915		1		ENSMUSG00000047485	ENSRNOG00000024479	ENSG00000185915 (-1) (21035398 21035398 21037332 21037332 19646177) 4001 (4001 nt) [IPR000210:BTB/POZ domain; IPR006652:Kelch repeat;]	10	-208.39	1045	ENSMUSG00000047485 (mmu-miR-101)		hsa-mir-101 rno-mir-101b hsa-mir-103 hsa-mir-106b hsa-mir-107 hsa-mir-140 hsa-mir-143 hsa-mir-146 hsa-mir-16 hsa-mir-17_5p hsa-mir-198 hsa-mir-199a mmu-mir-201 hsa-mir-26a hsa-mir-30e rno-mir-338 rno-mir-346 hsa-mir-9 hsa-mir-sf164_seth	hsa-mir-101 hsa-mir-106b hsa-mir-9 hsa-mir-30e hsa-mir-199a mmu-mir-201 rno-mir-346 hsa-mir-140 hsa-mir-146 rno-mir-338	0005515 protein binding IEA;	3' GAAGUCAAUAGUGUCAUGACAU 5' hsa-mir-101 __ ||||||||..:|||||:|||.. __ 5' CUUCAGUU--UACAGUGCUGCC 3' ENST00000331376_P E:-24.969999 S:116.000000 Loc:1191 Cons: 90.00%(mmu) %(rno)	3' UAGACGUGACAG-UCGUGAAAU 5' hsa-mir-106b __ :||||.|:||||.||.|||||| __ 5' GUCUGGAUUGUCUAGGACUUUA 3' ENST00000331376_P E:-24.18 S:114.000000 Loc:3499 Cons: 95.45%(mmu) %(rno)	3' AGUAUGUCGAUCUAUUG--GUUUCU 5' hsa-mir-9 __ |||||:||:|.|:||||..:||||. __ 5' UCAUAUAGUUUGGUAACAUUAAAGU 3' ENST00000331376_P E:-21.219999 S:114.000000 Loc:3212 Cons: 92.00%(mmu) %(rno)	3' AGGUCAGUUCCUACAAAUGU 5' hsa-mir-30e __ .|||..|||||||||.|:|| __ 5' CCCA--CAAGGAUGUCUGCA 3' ENST00000331376_P E:-20.67 S:108.000000 Loc:2932 Cons: 100.00%(mmu) %(rno)	3' UUGUCCAUCAGACUUGUGACCC 5' hsa-mir-199a __ ||||..||..||||:|||||.. __ 5' AACA--UAAGCUGAGCACUGUU 3' ENST00000331376_P E:-17.83 S:103.000000 Loc:3131 Cons: 90.00%(mmu) %(rno)	3' UCUUGUUACGGAAUGACUCAU 5' mmu-mir-201 __ ..|:|..||||||.|||:||: __ 5' UUAGC--UGCCUUUCUGGGUG 3' ENST00000331376_P E:-19 S:99.000000 Loc:2506 Cons: 100.00%(mmu) %(rno)	3' UCUCCGUCCGUGAGUCCGUCUGU 5' rno-mir-346 __ .||||:.||:|:|:.|.||||:| __ 5' UGAGGU-GGUAUUUUGACAGAUA 3' ENST00000331376_P E:-23.25 S:99.000000 Loc:3422 Cons: 90.91%(mmu) %(rno)	3' GAUGGUAUCCCAUUUUGGUGA 5' hsa-mir-140 __ .|:|::||..|.||::||||| __ 5' GUGCUGUA--GAAAGGCCACU 3' ENST00000331376_P E:-17.280001 S:98.000000 Loc:1759 Cons: 100.00%(mmu) %(rno)	3' UUGGGUACCUUAA-GUCAAGAGU 5' hsa-mir-146 __ :|.||||||..||.|||||||.. __ 5' GAGCCAUGG--UUACAGUUCUGC 3' ENST00000331376_P E:-22.290001 S:98.000000 Loc:556 Cons: 90.48%(mmu) %(rno)	3' AGUUGUUUUAGUGACUACGACCU 5' rno-mir-338 __ ..|::|.|.|||||||.||||.| __ 5' AAAGUACAUUCACUGA-GCUGUA 3' ENST00000331376_P E:-17.700001 S:96.000000 Loc:1925 Cons: 90.91%(mmu) %(rno)
ENST00000338086	ENSG00000055917	PUM2	1		ENSMUSG00000020594	ENSRNOG00000006180	PUMILIO HOMOLOG 2. [Source:RefSeq;Acc:NM_015317] ENSG00000055917 (-1) (20432969 20435858 20511633 20511656 20409386) 2889 (2889 nt) HUGO:14958:PUMH2 KIAA0235 [IPR001313:Pumilio/Puf RNA-binding;]	10	-189.27	1013	ENSMUSG00000020594 (mmu-let-7f)	ENSRNOG00000006180 (rno-miR-101b)	hsa-let-7f rno-mir-101b hsa-mir-124a hsa-mir-142_5p hsa-mir-18 hsa-mir-187 hsa-mir-199b hsa-mir-200c mmu-mir-202 hsa-mir-302 hsa-mir-31 hsa-mir-93	hsa-mir-199b hsa-mir-142_5p mmu-mir-202 hsa-mir-200c rno-mir-101b hsa-mir-187 hsa-mir-302 hsa-mir-18 hsa-mir-124a 95	0003723 RNA binding IEA;	3' CUUGUCUAUCAGAUUUGUGACCC 5' hsa-mir-199b __ ||.|||.|.||||||::.||||. __ 5' GACCAGUUUGUCUAAGUCCUGGC 3' ENST00000338086 E:-19.139999 S:108.000000 Loc:2726 Cons: %(mmu) 100.00%(rno)	3' CAUCACGAAAGAUGAAAUAC 5' hsa-mir-142_5p __ ..||||||||.||:|||:|. __ 5' AAAGUGCUUUGUAUUUUGUU 3' ENST00000338086 E:-18.34 S:107.000000 Loc:1784 Cons: %(mmu) 100.00%(rno)	3' AGAAGGGUACGCGAUAUGGAGA 5' mmu-mir-202 __ |:||||:.||||:.|.||||:| __ 5' UUUUCCUUUGCGUGAAACCUUU 3' ENST00000338086 E:-21.84 S:107.000000 Loc:450 Cons: 90.91%(mmu) 90.91%(rno)	3' AGGUAGUAA-UGGGCCGUCAUAA 5' hsa-mir-200c __ .||.||.||.|||:||||.|||. __ 5' GCCCUCUUUGACCUGGCAAUAUA 3' ENST00000338086 E:-19.32 S:104.000000 Loc:1214 Cons: %(mmu) 95.65%(rno)	3' GAAGUCGAUAGUGUCAUGACAU 5' rno-mir-101b __ |||::...|..|.||||||||| __ 5' CUUUGUACAGAAGAGUACUGUA 3' ENST00000338086 E:-17.59 S:103.000000 Loc:1519 Cons: %(mmu) 100.00%(rno)	3' GCCGACGUUGUGUUCUGUGCU 5' hsa-mir-187 __ |..|||.:|||:||||||:.| __ 5' CCUCUG-GACAUAAGACAUAA 3' ENST00000338086 E:-18.83 S:101.000000 Loc:1597 Cons: %(mmu) 95.00%(rno)	3' AGUGGUUUUGUACCUUCGUGAAU 5' hsa-mir-302 __ .:||.|||.|||||.:.|||||. __ 5' AUACAAAAUCAUGGUGACACUUC 3' ENST00000338086 E:-17.35 S:98.000000 Loc:722 Cons: %(mmu) 91.30%(rno)	3' AUAGACGUGAUCUACGUGGAAU 5' hsa-mir-18 __ |:.:||:||.||:||:||.||. __ 5' UGGUUGUAC-AGGUGUACAUUU 3' ENST00000338086 E:-18.08 S:97.000000 Loc:1114 Cons: %(mmu) 100.00%(rno)	3' ACCGUAAGUG-GCGCACGGAAUU 5' hsa-mir-124a __ ...||||:||..|||.||||||. __ 5' GUACAUUUACAAGCG-GCCUUAU 3' ENST00000338086 E:-21.75 S:95.000000 Loc:1629 Cons: %(mmu) 90.91%(rno)	3' UUGA-UAUGUUAGAUGAUGGAGU 5' hsa-let-7f __ :.||.:||.::|||||.|||.|| __ 5' GUCUGGUA-GGUCUACAACCCCA 3' ENST00000338086 E:-17.030001 S:93.000000 Loc:382 Cons: 95.45%(mmu) %(rno)
ENST00000258526_P	ENSG00000136040	PLXNC1	1		ENSMUSG00000020026	ENSRNOG00000007970	PLEXIN C1; RECEPTOR FOR VIRALLY-ENCODED SEMAPHORIN; PLEXIN (SEMAPHORIN RECEPTOR). [Source:RefSeq;Acc:NM_005761] ENSG00000136040 (1) (93044967 93045216 93201529 93201529 93730881) 4001 (4001 nt) HUGO:9106:VESPR [IPR000215:Serpin; IPR002165:Plexin; IPR002909:Cell surface receptor IPT/TIG;]	9	-204.22	957	ENSMUSG00000020026 (mmu-let-7a)	ENSRNOG00000007970 (mmu-let-7a)	hsa-let-7a hsa-let-7c rno-mir-101b hsa-mir-125a hsa-mir-125b rno-mir-140* hsa-mir-17_5p hsa-mir-205 hsa-mir-210 hsa-mir-221 hsa-mir-28 mmu-mir-291_5p mmu-mir-293 rno-mir-322 hsa-mir-98	mmu-mir-291_5p 115 rno-mir-140* hsa-mir-210 hsa-mir-28 hsa-mir-125b mmu-mir-293 rno-mir-322 hsa-mir-205	0004867 serine protease inhibitor activity IEA; 0004872 receptor activity IEA; 0005102 receptor binding TAS; 0007155 cell adhesion TAS; 0007275 development IEA; 0005886 plasma membrane NR; 0016021 integral to membrane NR;	3' UCUCUCCCGGAGGUGAAACUAC 5' mmu-mir-291_5p __ ||||||.|..|:|.|||||||| __ 5' AGAGAGAG--UUCCCUUUGAUG 3' ENST00000258526_P E:-25.780001 S:115.000000 Loc:3603 Cons: %(mmu) 90.00%(rno)	3' UUGAUAUGUUGGAUGAUGGAGU 5' hsa-let-7a __ .|.||||||||:|:.||:||:| __ 5' UAGUAUACAACUUGGUAUCUUA 3' ENST00000258526_P E:-22.540001 S:112.000000 Loc:1041 Cons: 95.45%(mmu) 95.45%(rno)	3' ACAGGCACCAAGAUGGGACACCAU 5' rno-mir-140* __ ..|::.|||.|..||||||||||. __ 5' GAUUUCUGG-UGAACCCUGUGGUU 3' ENST00000258526_P E:-27.379999 S:112.000000 Loc:899 Cons: 100.00%(mmu) 100.00%(rno)	3' GUCGGCGACAGUGUGCGUGUC 5' hsa-mir-210 __ .||.|...|.||||:|||||| __ 5' GAGACCAAGGCACAUGCACAG 3' ENST00000258526_P E:-23.49 S:109.000000 Loc:131 Cons: 100.00%(mmu) 95.24%(rno)	3' GAGUUAU-CUGACACUCGAGGAA 5' hsa-mir-28 __ :|:||||..||||||..:||||| __ 5' UUUAAUACCACUGUGUUUUCCUU 3' ENST00000258526_P E:-19.969999 S:105.000000 Loc:1223 Cons: 91.30%(mmu) 95.65%(rno)	3' AGUGUU-CAAUCCCAGAGUCCCU 5' hsa-mir-125b __ ..||||.||.:||||.|:||||. __ 5' AAACAAGGUGGGGGUGUUAGGGC 3' ENST00000258526_P E:-26.959999 S:104.000000 Loc:433 Cons: %(mmu) 91.30%(rno)	3' UGUGAUGUUUGAGACGCCGUGA 5' mmu-mir-293 __ |.|||||.|:||.||:.||||| __ 5' AAACUAC-AGCUAUGUAGCACU 3' ENST00000258526_P E:-19.110001 S:103.000000 Loc:335 Cons: 95.24%(mmu) 100.00%(rno)	3' ACAAC-GUCGCGAAGUACAAA 5' rno-mir-322 __ |||||..||.||.||:||||| __ 5' UGUUGAAAGGGC-UCGUGUUU 3' ENST00000258526_P E:-18.75 S:99.000000 Loc:589 Cons: 95.00%(mmu) 95.00%(rno)	3' GUCUGAGGCCACCUUACUUCCU 5' hsa-mir-205 __ |..|||..|||||.||||||.. __ 5' CUCACUGAGGUGGUAUGAAGAU 3' ENST00000258526_P E:-20.24 S:98.000000 Loc:1979 Cons: 95.45%(mmu) %(rno)
ENST00000264097	ENSG00000057103	ESRRG	1		ENSMUSG00000026610	ENSRNOG00000002593	ESTROGEN-RELATED RECEPTOR GAMMA (ESTROGEN RECEPTOR RELATED PROTEIN 3) (ERR GAMMA-2). [Source:SWISSPROT;Acc:O75454] ENSG00000057103 (-1) (213733094 213736779 213907318 213953293 213652177) 3685 (3685 n HUGO:3474: [IPR001628:Zn-finger, C4-type steroid receptor; IPR001723:Steroid hormone receptor; IPR000003:Retinoid X receptor; IPR000324:Vitamin D receptor; IPR003078:Retinoic acid receptor; IPR00053…	9	-167.85	874	ENSMUSG00000026610 (mmu-miR-103)	ENSRNOG00000002593 (mmu-miR-103)	hsa-mir-103 hsa-mir-140 hsa-mir-153 hsa-mir-16 hsa-mir-181b hsa-mir-182 rno-mir-330 rno-mir-342 rno-mir-351 hsa-mir-93	rno-mir-330 hsa-mir-16 hsa-mir-181b hsa-mir-93 hsa-mir-153 hsa-mir-182 hsa-mir-140 rno-mir-351 hsa-mir-103	0003700 transcription factor activity IEA; 0003707 steroid hormone receptor activity IEA; 0005496 steroid binding IEA; 0006355 regulation of transcription, DNA-dependent NAS; 0005634 nucleus NAS;	3' AGAGACGUCCGGGACACGA-AACG 5' rno-mir-330 __ |.|:..|..||:|||||:|.|||| __ 5' UAUUAACUCGCUCUGUGUUGUUGC 3' ENST00000264097 E:-21.450001 S:102.000000 Loc:2289 Cons: %(mmu) 95.83%(rno)	3' GCGGUUAUAAAUGCACGACGAU 5' hsa-mir-16 __ .|||||||..||:|||||.:|. __ 5' AGCCAAUA--UAUGUGCUUUUC 3' ENST00000264097 E:-19.1 S:102.000000 Loc:1593 Cons: 90.00%(mmu) 95.00%(rno)	3' UUGGGUGGCUGUCGUUACUUACAA 5' hsa-mir-181b __ ...:|||.||:.|||||..||||| __ 5' UUAUCACGGAU-GCAAUUUAUGUU 3' ENST00000264097 E:-20.139999 S:101.000000 Loc:1138 Cons: 95.65%(mmu) 91.30%(rno)	3' GAUGGACGUG-CUUGUCGUGAAA 5' hsa-mir-93 __ :|||||||.:.|:|.|.||:||| __ 5' UUACCUGCCUAGGAAAACAUUUU 3' ENST00000264097 E:-18.24 S:99.000000 Loc:3305 Cons: 91.30%(mmu) 91.30%(rno)	3' AGUGAAAACACUGAUACGUU 5' hsa-mir-153 __ .:|:||||||||.|:||:|. __ 5' AUAUUUUUGUGA-UGUGUAC 3' ENST00000264097 E:-17.030001 S:96.000000 Loc:3490 Cons: 100.00%(mmu) 100.00%(rno)	3' ACACUCA-AGAUGGUAA-CGGUUU 5' hsa-mir-182 __ ..||.||.||||:||||.||:|.| __ 5' ACUGUGUAUCUAUCAUUAGCUAUA 3' ENST00000264097 E:-18.08 S:95.000000 Loc:2415 Cons: 91.67%(mmu) %(rno)	3' GAU-GGUAUCCCAUUUUGGUGA 5' hsa-mir-140 __ :||..||.||||||:||::|.. __ 5' UUAGACACAGGGUAGAAUUAGA 3' ENST00000264097 E:-17.059999 S:95.000000 Loc:1965 Cons: 95.45%(mmu) 95.45%(rno)	3' GUCCGAGUUUC--CCGAGGAGUCCCU 5' rno-mir-351 __ :||.:.|.|.|....:|::||||||| __ 5' UAGCUACUAUGUAACUUUUUCAGGGA 3' ENST00000264097 E:-18.379999 S:93.000000 Loc:867 Cons: 92.31%(mmu) 92.31%(rno)	3' AGUAUCGGGACAU-GUUA-CGACGA 5' hsa-mir-103 __ ..||:|.||.||:.:|:|.|||||| __ 5' CAAUGGACCAGUGUUAGUAGCUGCU 3' ENST00000264097 E:-18.370001 S:91.000000 Loc:1755 Cons: 92.00%(mmu) 92.00%(rno)
ENST00000264073	ENSG00000066044	ELAVL1	1		ENSMUSG00000040028	ENSRNOG00000001069	ELAV-LIKE PROTEIN 1 (HU-ANTIGEN R) (HUR). [Source:SWISSPROT;Acc:Q15717] ENSG00000066044 (-1) (7933159 7934367 7962699 8120224 8118365) 1208 (1208 nt) HUGO:3312:Hua HuR MelG [IPR000504:RNA-binding region RNP-1 (RNA recognition motif); IPR002343:Paraneoplastic encephalomyelitis antigen;]	8	-151.72	812	ENSMUSG00000040028 (mmu-miR-125a)	ENSRNOG00000001069 (mmu-miR-125a)	hsa-mir-125a hsa-mir-129 hsa-mir-134 hsa-mir-199b hsa-mir-214 mmu-mir-294 hsa-mir-302 hsa-mir-9	hsa-mir-125a hsa-mir-214 hsa-mir-9 hsa-mir-199b mmu-mir-294 hsa-mir-134 hsa-mir-134 hsa-mir-302	0003730 mRNA 3' UTR binding NR; 0006401 RNA catabolism NR; 0007275 development TAS;	3' GUGUCCAAUUUCCCAGAGUCCCU 5' hsa-mir-125a __ .|::|...||||.||:||||||| __ 5' AAUGGACCAAAGAGUUUCAGGGA 3' ENST00000264073 E:-22.290001 S:113.000000 Loc:670 Cons: 91.30%(mmu) 91.30%(rno)	3' GACGGACAGACACGGACGACA 5' hsa-mir-214 __ :|||:|.|:||||::|.:||| __ 5' UUGCUUUUUUGUGUUUUUUGU 3' ENST00000264073 E:-19.84 S:109.000000 Loc:1136 Cons: 100.00%(mmu) 100.00%(rno)	3' AGUAUGUC-GAUCUAUUGGUUUCU 5' hsa-mir-9 __ |::|||:|..|||||||::.|||| __ 5' UUGUACGGAAUAGAUAAUU-AAGA 3' ENST00000264073 E:-18.1 S:107.000000 Loc:17 Cons: 95.65%(mmu) 95.65%(rno)	3' CUUGUCUAUCAGAUUUGUGACCC 5' hsa-mir-199b __ ||:.||:|..|:||.||.||||| __ 5' GAGAAGGU-UUUUAUACUCUGGG 3' ENST00000264073 E:-17.879999 S:100.000000 Loc:126 Cons: 90.91%(mmu) %(rno)	3' UGUGUGUUUUCCCUUCGUGAAA 5' mmu-mir-294 __ ||||.||:.||..|||:||||. __ 5' ACACUCAGCAGAAAAGUACUUA 3' ENST00000264073 E:-17.01 S:98.000000 Loc:996 Cons: 95.45%(mmu) %(rno)	3' GGGAGACCAGUUGGUCAGUGU 5' hsa-mir-134 __ ||:.|||.|||.:|||||.|: __ 5' CCUCCUGCUCACUCAGUCCCG 3' ENST00000264073 E:-21.120001 S:97.000000 Loc:507 Cons: %(mmu) 90.48%(rno)	3' GGGAGACCAGUUGGUCAGUGU 5' hsa-mir-134 __ :.|.:||..:||||||||.|. __ 5' UGCAUUGACUAACCAGUCCCU 3' ENST00000264073 E:-17.91 S:94.000000 Loc:258 Cons: %(mmu) 95.24%(rno)	3' AGUGGUUUUGUACCUUCGUGA-AU 5' hsa-mir-302 __ .|||.:||||||..:||||:|.|| __ 5' ACACAGAAACAUUUGAGCAUUGUA 3' ENST00000264073 E:-17.57 S:94.000000 Loc:892 Cons: 95.83%(mmu) %(rno)
ENST00000322002	ENSG00000176887	SOX11	1		ENSMUSG00000055974	ENSRNOG00000008220	TRANSCRIPTION FACTOR SOX-11. [Source:SWISSPROT;Acc:P35716] ENSG00000176887 (1) (5854538 5854593 5855918 5863255 6132831) 7337 (7337 nt) HUGO:11191: [IPR001687:ATP/GTP-binding site motif A (P-loop); IPR000910:HMG1/2 (high mobility group) box; IPR001472:Bipartite nuclear localization signal;]	8	-169.92	804	ENSMUSG00000055974 (mmu-let-7f)	ENSRNOG00000008220 (mmu-let-7f)	hsa-let-7f hsa-let-7c hsa-let-7a hsa-let-7i hsa-mir-139 hsa-mir-147 mmu-mir-201 hsa-mir-302 hsa-mir-321 rno-mir-326 rno-mir-327 hsa-mir-34c	hsa-mir-139 rno-mir-327 hsa-mir-147 hsa-mir-302 98 hsa-mir-321 rno-mir-326	0003677 DNA binding IEA; 0006355 regulation of transcription, DNA-dependent IEA; 0007399 neurogenesis TAS; 0005634 nucleus IEA;	3' UUGGUAUGUUGGAUGAUGGAGU 5' hsa-let-7c __ .||||.|||:||||..|||||| __ 5' UACCAGACAGCCUA-GACCUCA 3' ENST00000322002 E:-28.26 S:107.000000 Loc:873 Cons: 90.48%(mmu) 90.48%(rno)	3' UCUGUG-CACGUGACAUCU 5' hsa-mir-139 __ ||||.|..||||||||.|| __ 5' AGACUCAAUGCACUGUCGA 3' ENST00000322002 E:-17.610001 S:105.000000 Loc:1487 Cons: 94.74%(mmu) 94.74%(rno)	3' UGGGAGUA-CGGGGAGUUCC 5' rno-mir-327 __ .||:|:||.|:.:||||||| __ 5' UCCUUUAUCGUGUCUCAAGG 3' ENST00000322002 E:-25.08 S:103.000000 Loc:277 Cons: 95.00%(mmu) 95.00%(rno)	3' CGUCUUCGUAAAGGUGUGUG 5' hsa-mir-147 __ .|||:.|:||||::::|||. __ 5' UCAGGCGUAUUUUUGUACAG 3' ENST00000322002 E:-17.379999 S:102.000000 Loc:962 Cons: 100.00%(mmu) %(rno)	3' AGUGGUUUUGUACCUUCGUGAAU 5' hsa-mir-302 __ |||.:||:||.|..|:||||||. __ 5' UCAGUAAGACUUUCAGGCACUUC 3' ENST00000322002 E:-17.799999 S:100.000000 Loc:1010 Cons: 100.00%(mmu) 100.00%(rno)	3' UCGUGUUUGAUGAUGGAGU 5' hsa-let-7i __ |||||.||||::|||:.:| __ 5' AGCAC-AACUGUUACUCUA 3' ENST00000322002 E:-18.620001 S:97.000000 Loc:502 Cons: 94.44%(mmu) 94.44%(rno)	3' CUUGGGUGUUA-GGGACCGAAU 5' hsa-mir-321 __ .:::.|::.||.:|||||:||| __ 5' UGGUACGUUAUGUCCUGGUUUA 3' ENST00000322002 E:-19.139999 S:96.000000 Loc:1084 Cons: 95.45%(mmu) 95.45%(rno)	3' UGACCUCCUUCCCGGGUCU-CC 5' rno-mir-326 __ ..||||.|.:||.||||||.|| __ 5' UGUGGAUG-GGGCCCCAGAUGG 3' ENST00000322002 E:-26.030001 S:94.000000 Loc:1328 Cons: %(mmu) 90.48%(rno)
ENST00000246047	ENSG00000125848	FLRT3	1		ENSMUSG00000051379	ENSRNOG00000004874	LEUCINE-RICH REPEAT TRANSMEMBRANE PROTEIN FLRT3 PRECURSOR (FIBRONECTIN-LIKE DOMAIN-CONTAINING LEUCINE-RICH TRANSMEMBRANE PROTEIN 3). [Source:SWISSPROT;Acc:Q9NZU0] ENSG00000125848 (-1) (14298634 143012 HUGO:3762: [IPR001211:Phospholipase A2; IPR003961:Fibronectin, type III; IPR001611:Leucine-rich repeat; IPR000372:Cysteine-rich flanking region, N-terminal; IPR000483:Cysteine-rich flanking region, …	8	-161.51	803	ENSMUSG00000051379 (mmu-let-7c)	ENSRNOG00000004874 (mmu-let-7c)	hsa-let-7c hsa-mir-124a hsa-mir-128b hsa-mir-128a hsa-mir-16 hsa-mir-17_5p hsa-mir-18 hsa-mir-189 hsa-mir-27b hsa-mir-320 rno-mir-324_3p hsa-mir-95 hsa-mir-sf202_seth	hsa-mir-128b hsa-mir-17_5p hsa-mir-320 hsa-mir-16 rno-mir-324_3p hsa-mir-189 91 hsa-mir-18	0004895 cell adhesion receptor activity TAS; 0005057 receptor signaling protein activity NAS; 0030022 adhesive extracellular matrix constituent activity NAS; 0000004 biological_process unknown ND; 0007155 cell adhesion IEA; 0007165 signal transduction TAS; 0005887 integral to plasma membrane NAS;	3' CUUUCU-CUGGCCAAGUGACACU 5' hsa-mir-128b __ |.||||.|||:.|||.||||||| __ 5' GUAAGAUGACUUGUUGACUGUGA 3' ENST00000246047 E:-24.549999 S:122.000000 Loc:306 Cons: 95.65%(mmu) 95.65%(rno)	3' UGAUGGACGUGACAUUCGUGAAAC 5' hsa-mir-17_5p __ .|.|..||||:||||.||.||||| __ 5' CCAAAGUGCAUUGUACGCCCUUUG 3' ENST00000246047 E:-20.82 S:111.000000 Loc:1277 Cons: 95.83%(mmu) 95.83%(rno)	3' AAGCGGGAGAGUUGGGUCGAAAA 5' hsa-mir-320 __ ..|||:...|..|::|||||||| __ 5' AACGCUACAUGUAUUCAGCUUUU 3' ENST00000246047 E:-20.01 S:105.000000 Loc:1327 Cons: 100.00%(mmu) 100.00%(rno)	3' GCGGUUAUAAAUGC-ACGACGAU 5' hsa-mir-16 __ :|::|:|:||||:|.||:|.:|| __ 5' UGUUAGUGUUUAUGAUGUUUUUA 3' ENST00000246047 E:-18.92 S:100.000000 Loc:892 Cons: 95.65%(mmu) 91.30%(rno)	3' GGUCGUCGUGGACCCCGUCACC 5' rno-mir-324_3p __ .|.||.||:.:||..|:||||| __ 5' ACUGCUGCGAUUGAUGUAGUGG 3' ENST00000246047 E:-23.59 S:92.000000 Loc:181 Cons: 90.91%(mmu) %(rno)	3' UGACUAUA-GUCGAGUCAUCCGUG 5' hsa-mir-189 __ |||||.||.||..||||..||||: __ 5' ACUGA-AUACA--UCAGCUGGCAU 3' ENST00000246047 E:-18.610001 S:91.000000 Loc:645 Cons: 95.24%(mmu) %(rno)	3' UUGGUAUGUUGGAUGAUGGAGU 5' hsa-let-7c __ .:|||||:||::||.||::|.| __ 5' UGCCAUAUAAUUUA-UAUUUAA 3' ENST00000246047 E:-17.23 S:91.000000 Loc:127 Cons: 100.00%(mmu) 100.00%(rno)	3' AUAGACGUGAUCUACGUGGAAU 5' hsa-mir-18 __ .||:||:|||:.||.:.||||: __ 5' AAUUUGUACUGUAUUUUCCUUG 3' ENST00000246047 E:-17.780001 S:91.000000 Loc:243 Cons: 100.00%(mmu) %(rno)
ENST00000308249	ENSG00000175175	PPM1E	1		ENSMUSG00000046442	ENSRNOG00000024730	PROTEIN PHOSPHATASE 1E; PARTNER OF PIX 1. [Source:RefSeq;Acc:NM_014906] ENSG00000175175 (1) (57307870 57307997 57532813 57536953 57707540) 4140 (4140 nt) HUGO:19322:KIAA1072 POPX1 PP2CH [IPR000222:Protein phosphatase 2C subfamily; IPR001932:Protein phosphatase 2C-like; IPR000694:Proline-rich region;]	8	-158.84	787	ENSMUSG00000046442 (mmu-let-7b)	ENSRNOG00000024730 (mmu-miR-18)	hsa-let-7b hsa-mir-103 hsa-mir-124a hsa-mir-130a hsa-mir-133a mmu-mir-133 rno-mir-148b hsa-mir-16 hsa-mir-18 hsa-mir-181b rno-mir-330	rno-mir-330 hsa-mir-18 hsa-mir-130a hsa-mir-133a hsa-mir-103 hsa-mir-16 hsa-mir-181b	0000287 magnesium ion binding IEA; 0004722 protein serine/threonine phosphatase activity IEA; 0016787 hydrolase activity IEA; 0006470 protein amino acid dephosphorylation IEA; 0008287 protein serine/threonine phosphatase complex IEA;	3' UUGGUGUGUUG-GAUGAUGGAGU 5' hsa-let-7b __ :||:|||||:|..|::||.|||| __ 5' GACUACACAGCAGUGUUAACUCA 3' ENST00000308249 E:-22.950001 S:104.000000 Loc:2139 Cons: 91.30%(mmu) %(rno)	3' AGAGACGUCCGGGACACGAAACG 5' rno-mir-330 __ ..||||::..::.||||:||||: __ 5' AGUCUGUGAAUUAUGUGUUUUGU 3' ENST00000308249 E:-17.58 S:104.000000 Loc:2638 Cons: 100.00%(mmu) %(rno)	3' AUAGACGUGAUCUACGUGGAAU 5' hsa-mir-18 __ .|||||..||.||||::|||.| __ 5' AAUCUGGUCU-GAUGUGCCUAA 3' ENST00000308249 E:-18.219999 S:103.000000 Loc:379 Cons: %(mmu) 95.24%(rno)	3' CGGGAAAAUUGUAACGUGAC 5' hsa-mir-130a __ .:||||.|.|||||.||||| __ 5' CUCCUUGU-ACAUU-CACUG 3' ENST00000308249 E:-19.17 S:100.000000 Loc:2871 Cons: 100.00%(mmu) %(rno)	3' UGUCGACC-AACUUCCCCUGGUU 5' hsa-mir-133a __ ::|.:|||..||||||.|:|::| __ 5' GUAAUUGGAAUGAAGGAGGCUGA 3' ENST00000308249 E:-18.639999 S:98.000000 Loc:1029 Cons: 91.30%(mmu) %(rno)	3' AGUAUCGGGACAUGUUACG--ACGA 5' hsa-mir-103 __ .||..||::|||:.|||||..||:| __ 5' GCAGUGCUUUGUGAAAUGCAGUGUU 3' ENST00000308249 E:-18.360001 S:95.000000 Loc:2391 Cons: 92.00%(mmu) %(rno)	3' GCGGUUAUAAAUGCACG-ACGAU 5' hsa-mir-16 __ :|||..|||||:|.|||.||||: __ 5' UGCCCUUAUUUGC-UGCUUGCUG 3' ENST00000308249 E:-22.99 S:92.000000 Loc:2467 Cons: 90.91%(mmu) %(rno)	3' UUGGGUGGCUGUCGUUACUUACAA 5' hsa-mir-181b __ |:.::||:||||||.|.|..|||| __ 5' AGAUUACUGACAGCCAGGUCUGUU 3' ENST00000308249 E:-20.93 S:91.000000 Loc:1092 Cons: 91.67%(mmu) %(rno)
ENST00000307885	ENSG00000174233	ADCY6	1		ENSMUSG00000022994	ENSRNOG00000011587	ADENYLATE CYCLASE, TYPE VI (EC 4.6.1.1) (ATP PYROPHOSPHATE-LYASE) (CA(2+)-INHIBITABLE ADENYLYL CYCLASE). [Source:SWISSPROT;Acc:O43306] ENSG00000174233 (-1) (47446248 47448641 47463484 47463484 4739704 HUGO:237: [IPR001054:Guanylate cyclase; IPR001472:Bipartite nuclear localization signal;]	7	-154.33	742	ENSMUSG00000022994 (mmu-miR-182)	ENSRNOG00000011587 (mmu-miR-182)	hsa-mir-182 hsa-mir-205 hsa-mir-220 hsa-mir-25 hsa-mir-27b mmu-mir-298 mmu-mir-300 hsa-mir-302 rno-mir-324_3p rno-mir-330 rno-mir-340	mmu-mir-298 hsa-mir-220 hsa-mir-182 rno-mir-330 hsa-mir-27b mmu-mir-300 hsa-mir-302	0000287 magnesium ion binding IEA; 0004383 guanylate cyclase activity IEA; 0008294 calcium/calmodulin-responsive adenylate cyclase activity IEA; 0016829 lyase activity IEA; 0006171 cAMP biosynthesis IEA; 0007242 intracellular signaling cascade IEA; 0016021 integral to membrane IEA;	3' CCUUCUUGUCGGGAGGAG-ACGG 5' mmu-mir-298 __ ||:|||:.||:|||::|:.|||| __ 5' GGGAGAGGAGUCCUUUUUGUGCC 3' ENST00000307885 E:-31.620001 S:114.000000 Loc:1247 Cons: %(mmu) 95.65%(rno)	3' UUUCACAGUCUAUGCCACACC 5' hsa-mir-220 __ .|:|.||.:|||:.||||||| __ 5' CAGGAGUGGGAUGGGGUGUGG 3' ENST00000307885 E:-26.629999 S:111.000000 Loc:1216 Cons: %(mmu) 95.24%(rno)	3' ACACUCAAGAUGGUA-ACGGUUU 5' hsa-mir-182 __ .|.||.|.:|.||||.||||||| __ 5' GGAGAAUGUUUCCAUGUGCCAAA 3' ENST00000307885 E:-17.940001 S:109.000000 Loc:591 Cons: 91.30%(mmu) 91.30%(rno)	3' AGAGACGUCCGGGACACGAAACG 5' rno-mir-330 __ ||.|.|||||..||||||||.|. __ 5' UCCCAGCAGG--CUGUGCUUGGA 3' ENST00000307885 E:-21.139999 S:108.000000 Loc:125 Cons: %(mmu) 95.24%(rno)	3' GUCUUGAAUCGGUGACACUU 5' hsa-mir-27b __ :|.||:.||.||||||||:: __ 5' UAUAAUGUAACCACUGUGGG 3' ENST00000307885 E:-17.879999 S:105.000000 Loc:2295 Cons: %(mmu) 100.00%(rno)	3' CUUCUCUCGAACGGGAACGUAU 5' mmu-mir-300 __ ..|||||||..|||:.||::|: __ 5' UCAGAGAGCAAGCCUGUGUGUG 3' ENST00000307885 E:-20.6 S:99.000000 Loc:738 Cons: 95.45%(mmu) %(rno)	3' AGUGGUUUUGUACCUUCGUGAAU 5' hsa-mir-302 __ ..:|::.::||.||::|||||.| __ 5' GAGCUGUGGCA-GGGGGCACUGA 3' ENST00000307885 E:-18.52 S:96.000000 Loc:72 Cons: 95.45%(mmu) %(rno)
ENST00000293233	ENSG00000161547	SFRS2	1		ENSMUSG00000034120	ENSRNOG00000000248	SPLICING FACTOR, ARGININE/SERINE-RICH 2 (SPLICING FACTOR SC35) (SC-35) (SPLICING COMPONENT, 35 KDA) (PR264 PROTEIN). [Source:SWISSPROT;Acc:Q01130] ENSG00000161547 (-1) (75327324 75329366 75330365 7533 HUGO:10783:PR264 SC-35 SC35 [IPR000504:RNA-binding region RNP-1 (RNA recognition motif); IPR001472:Bipartite nuclear localization signal;]	7	-136.24	714	ENSMUSG00000034120 (mmu-miR-103)	ENSRNOG00000000248 (mmu-miR-103)	hsa-mir-103 hsa-mir-107 hsa-mir-126* hsa-mir-139 hsa-mir-15a hsa-mir-15b hsa-mir-153 hsa-mir-16 rno-mir-20* mmu-mir-292_3p rno-mir-337 rno-mir-351 hsa-mir-363 hsa-mir-93 hsa-mir-sf196_seth	rno-mir-337 hsa-mir-15a hsa-mir-93 hsa-mir-sf196_seth hsa-mir-363 rno-mir-351 mmu-mir-292_3p	0003676 nucleic acid binding IEA; 0003723 RNA binding IEA; 0008248 pre-mRNA splicing factor activity TAS; 0006371 mRNA splicing TAS; 0005634 nucleus NR;	3' UUUCCGU-AGUAUAUCCUCGACUU 5' rno-mir-337 __ |::.|||.|::|:|||.||:|||: __ 5' AGGCGCAGUUGUGUAGCAGUUGAG 3' ENST00000293233 E:-20.01 S:111.000000 Loc:601 Cons: 95.83%(mmu) 95.83%(rno)	3' GUGUUUGGUAAUAC-ACGACGAU 5' hsa-mir-15a __ :|::.:|||||.||.|||||:|| __ 5' UAUGUGCCAUUUUGUUGCUGUUA 3' ENST00000293233 E:-20.1 S:107.000000 Loc:172 Cons: 95.65%(mmu) 95.65%(rno)	3' GAUGGACGUGCUUGUCGUGAAA 5' hsa-mir-93 __ .|:||||.||.|||.||||||. __ 5' AUGCCUG-AC-AACUGCACUUC 3' ENST00000293233 E:-21.08 S:105.000000 Loc:755 Cons: 100.00%(mmu) %(rno)	3' CCGUCACAUCAAUCGACUAACG 5' hsa-mir-sf196_seth __ .||||.||:.||:||||.||.| __ 5' UGCAGAGUGCUUGGCUGUUUCC 3' ENST00000293233 E:-18.16 S:103.000000 Loc:661 Cons: 100.00%(mmu) 100.00%(rno)	3' AAUGUCUAC-CUAUGGCACGUUA 5' hsa-mir-363 __ .||.|||||...|::||||||:. __ 5' GUAAAGAUGCCUUGUCGUGCAGA 3' ENST00000293233 E:-20.290001 S:100.000000 Loc:706 Cons: 95.65%(mmu) 95.65%(rno)	3' GUCCGAGUUUCCCGAGGAGUCC-CU 5' rno-mir-351 __ :..|:.:|||.|.||::|||||.|| __ 5' UUUGUAUAAA-GACUUUUCAGGUGA 3' ENST00000293233 E:-19.25 S:97.000000 Loc:506 Cons: 95.83%(mmu) 95.83%(rno)	3' UGUGAGUUUUGGACCGCCGUGAA 5' mmu-mir-292_3p __ ::|||:|.|||.|||:|...||| __ 5' GUACUUAUAACAUGGUGUAUCUU 3' ENST00000293233 E:-17.35 S:91.000000 Loc:946 Cons: 95.65%(mmu) %(rno)
ENST00000261798	ENSG00000113712	CSNK1A1	1		ENSMUSG00000024576	ENSRNOG00000017106	CASEIN KINASE I, ALPHA ISOFORM (EC 2.7.1.-) (CKI-ALPHA) (CK1). [Source:SWISSPROT;Acc:P48729] ENSG00000113712 (-1) (148904059 148913515 148959037 148959168 148787349) 870 (870 nt) HUGO:2451: [IPR000719:Protein kinase; IPR002290:Serine/Threonine protein kinase;]	7	-135.46	698	ENSMUSG00000024576 (mmu-let-7c)		hsa-let-7c hsa-let-7a hsa-let-7f rno-mir-101b hsa-mir-105 hsa-mir-130b hsa-mir-134 hsa-mir-146 hsa-mir-149 hsa-mir-15b hsa-mir-221 hsa-mir-24 mmu-mir-290 mmu-mir-292_5p hsa-mir-30d rno-mir-330	hsa-mir-105 rno-mir-330 hsa-mir-130b hsa-mir-134 hsa-mir-221 97 rno-mir-101b	0004674 protein serine/threonine kinase activity IEA; 0004681 casein kinase I activity TAS; 0004713 protein-tyrosine kinase activity IEA; 0005524 ATP binding IEA; 0016740 transferase activity IEA; 0006468 protein amino acid phosphorylation TAS; 0007166 cell surface receptor linked signal transduction TAS;	3' UGUCCUCAGACUCGUAAACU 5' hsa-mir-105 __ .||.|.||:|||||||.||| __ 5' CCA-GUGUUUGAGCAUAUGA 3' ENST00000261798 E:-21.34 S:110.000000 Loc:552 Cons: 94.74%(mmu) %(rno)	3' AGAGACGUCCGGGACACGAAACG 5' rno-mir-330 __ |:|:|.||..|||||.|.||||| __ 5' UUUUUCCA-UCCCUGGGGUUUGC 3' ENST00000261798 E:-17.93 S:103.000000 Loc:451 Cons: 95.45%(mmu) %(rno)	3' UACGGGAAAGUAG-UAACGUGAC 5' hsa-mir-130b __ :||:||..|:.||.||||||:|. __ 5' GUGUCCGGUUUUCUAUUGCAUUU 3' ENST00000261798 E:-18.17 S:100.000000 Loc:234 Cons: 95.65%(mmu) %(rno)	3' GGGAGACCAGUUGGUCAGUGU 5' hsa-mir-134 __ ..:|.|||.||||||.|:||. __ 5' GGUUGUGGACAACCAUUUACU 3' ENST00000261798 E:-17.299999 S:99.000000 Loc:103 Cons: 100.00%(mmu) %(rno)	3' CUUUGGGUCGUCUGUUACAUCGA 5' hsa-mir-221 __ |.||.|||||.||:|..|||||. __ 5' GCAAGCCAGCUGAUAUGGUAGCA 3' ENST00000261798 E:-21.790001 S:98.000000 Loc:518 Cons: 95.65%(mmu) %(rno)	3' UUGAUAUGUUG-GAUGAUGGAGU 5' hsa-let-7a __ ||||||||.:|.:|:..|:|||| __ 5' AACUAUACUGCUUUGAGAUCUCA 3' ENST00000261798 E:-19.290001 S:96.000000 Loc:350 Cons: 95.65%(mmu) %(rno)	3' GAAGUCGAUAGUGUCAUGACAU 5' rno-mir-101b __ |||||||...||||||..|||: __ 5' CUUCAGC---CACAGU--UGUG 3' ENST00000261798 E:-19.639999 S:92.000000 Loc:397 Cons: 100.00%(mmu) %(rno)
ENST00000246229	ENSG00000126003	PLAGL2	1		ENSMUSG00000051413	ENSRNOG00000010086	ZINC FINGER PROTEIN PLAGL2 (PLEIOMORPHIC ADENOMA-LIKE PROTEIN 2). [Source:SWISSPROT;Acc:Q9UPG8] ENSG00000126003 (-1) (31525307 31529255 31534981 31540531 31523073) 3948 (3948 nt) HUGO:9047: [IPR007087:Zn-finger, C2H2 type;]	7	-137.14	690	ENSMUSG00000051413 (mmu-let-7i)	ENSRNOG00000010086 (mmu-miR-223)	hsa-let-7i hsa-mir-125a hsa-mir-125b hsa-mir-216 hsa-mir-217 hsa-mir-222 hsa-mir-223 rno-mir-331	hsa-mir-125b 110 hsa-mir-125a hsa-mir-222 hsa-mir-223 hsa-mir-216 hsa-mir-217	0003700 transcription factor activity TAS; 0006355 regulation of transcription, DNA-dependent IEA; 0005634 nucleus IEA;	3' AGUGUUCAAUCCCAGAGUCCCU 5' hsa-mir-125b __ ||.|.||.||||||:|||||.. __ 5' UCUCCAG-UAGGGUUUCAGGAC 3' ENST00000246229 E:-23.07 S:110.000000 Loc:1705 Cons: 95.24%(mmu) %(rno)	3' UCGUGUUUGAUGAUGGAGU 5' hsa-let-7i __ :..|||.|||.|||||||. __ 5' GAAACACACUUCUACCUCU 3' ENST00000246229 E:-17.469999 S:101.000000 Loc:1617 Cons: 100.00%(mmu) %(rno)	3' GUGUCCAA-UUUCCCAGAGUCCCU 5' hsa-mir-125a __ ..:||.||.|:.|.|||.|||||| __ 5' AUUAGUUUCAGUGAGUCCCAGGGA 3' ENST00000246229 E:-19.49 S:98.000000 Loc:2031 Cons: 95.83%(mmu) %(rno)	3' CUCUGGGUCAUCGGUCUACAUCGA 5' hsa-mir-222 __ .|.|:||:|.|..|||:|||:.:| __ 5' AAAAUCCGGGAAGCAGGUGUGAUU 3' ENST00000246229 E:-21.16 S:98.000000 Loc:3100 Cons: 95.83%(mmu) %(rno)	3' CCCCAUAAACUGUUUGACUGU 5' hsa-mir-223 __ .|||.|....|:||||||||. __ 5' UGGGGA---AAUAAACUGACU 3' ENST00000246229 E:-18.700001 S:96.000000 Loc:805 Cons: 100.00%(mmu) 100.00%(rno)	3' GUGU-CAACGGUCGACUCUAAU 5' hsa-mir-216 __ |.||.|..|.||||||||.||. __ 5' CCCAUGAAGGCAGCUGAGCUUU 3' ENST00000246229 E:-17.01 S:94.000000 Loc:70 Cons: 95.45%(mmu) %(rno)	3' UAGGUUAGUCAAGGACUACGUCAU 5' hsa-mir-217 __ |.|||.|::||.||||:||:..|| __ 5' AACCAUUUGGUACCUGGUGU--UA 3' ENST00000246229 E:-20.24 S:93.000000 Loc:709 Cons: 90.91%(mmu) %(rno)
ENST00000290325	ENSG00000159202		1		ENSMUSG00000014349	ENSRNOG00000006868	ENSG00000159202 (1) (47460501 47462815 47479134 47481054 47549442) 1920 (1920 nt) [IPR000608:Ubiquitin-conjugating enzymes;]	7	-149.87	678	ENSMUSG00000014349 (mmu-miR-217)	ENSRNOG00000006868 (mmu-miR-18)	hsa-mir-18 hsa-mir-198 hsa-mir-217 mmu-mir-300 hsa-mir-321 rno-mir-330 hsa-mir-sf164_seth	hsa-mir-sf164_seth hsa-mir-321 hsa-mir-18 hsa-mir-198 mmu-mir-300 hsa-mir-217 rno-mir-330	0004840 ubiquitin conjugating enzyme activity IEA; 0004842 ubiquitin-protein ligase activity IEA; 0016874 ligase activity IEA; 0006512 ubiquitin cycle IEA;	3' GAUGUAUCUUACCGUAGAGAGU 5' hsa-mir-sf164_seth __ |||||||||||.|:.|||:.|| __ 5' CUACAUAGAAUAGUCUCUUACA 3' ENST00000290325 E:-24.16 S:105.000000 Loc:839 Cons: 95.45%(mmu) 95.45%(rno)	3' CUUGGGUGUUAGGGACCGAAU 5' hsa-mir-321 __ |..|||:|||||.|||.:||: __ 5' GUUCCCGCAAUCACUGAUUUG 3' ENST00000290325 E:-22.75 S:98.000000 Loc:774 Cons: 90.48%(mmu) 90.48%(rno)	3' AUAGA-CGUGAUCUACGUGGAAU 5' hsa-mir-18 __ ||.||.||||..||.|||||||. __ 5' UACCUAGCACCUGA-GCACCUUU 3' ENST00000290325 E:-20.309999 S:97.000000 Loc:629 Cons: %(mmu) 90.91%(rno)	3' GGAUAGAGGGGAGACCUGG 5' hsa-mir-198 __ ..|.|||.||:|.||||:| __ 5' GGUCUCUGCCUUGUGGAUC 3' ENST00000290325 E:-21.309999 S:96.000000 Loc:1417 Cons: %(mmu) 100.00%(rno)	3' CUUCUCUCGAACGGGAACGUAU 5' mmu-mir-300 __ |::.|||||.||.:||.||||| __ 5' GGGCAGAGCAUG-UCUGGCAUA 3' ENST00000290325 E:-19.389999 S:95.000000 Loc:1753 Cons: 90.48%(mmu) %(rno)	3' UAGGUUAGUCAAGGACUACGUCAU 5' hsa-mir-217 __ :||:..||||.||:|||.||||.: __ 5' GUCU--UCAG-UCUUGAAGCAGGG 3' ENST00000290325 E:-18.83 S:94.000000 Loc:458 Cons: 100.00%(mmu) 100.00%(rno)	3' AGAGACGUCCGGGACACGAAACG 5' rno-mir-330 __ ..||||::||:||.|||:|.|.: __ 5' GGUCUGUGGGUCCAGUGUUGUCU 3' ENST00000290325 E:-23.120001 S:93.000000 Loc:1674 Cons: 100.00%(mmu) 100.00%(rno)
ENST00000306315	ENSG00000168916		1		ENSMUSG00000052701	ENSRNOG00000023197	ENSG00000168916 (-1) (124048826 124049809 124156898 124157021 122835255) 983 (983 nt) [IPR001687:ATP/GTP-binding site motif A (P-loop); IPR007087:Zn-finger, C2H2 type;]	6	-129.18	640	ENSMUSG00000052701 (mmu-let-7g)	ENSRNOG00000023197 (mmu-miR-124a)	hsa-let-7g hsa-mir-124a hsa-mir-144 hsa-mir-210 hsa-mir-26a mmu-mir-291_3p mmu-mir-294 mmu-mir-300 rno-mir-328	mmu-mir-291_3p hsa-mir-144 hsa-mir-124a 99 hsa-mir-210 rno-mir-328		3' CCGUGUGUUUCACCUUCGUGAAA 5' mmu-mir-291_3p __ ||..||||.:|.||||||:|||| __ 5' GGAUCACAUGG-GGAAGCGCUUU 3' ENST00000306315 E:-25.049999 S:124.000000 Loc:31 Cons: %(mmu) 100.00%(rno)	3' GAUC-AUGUAGUAGAUAUGACAU 5' hsa-mir-144 __ ||:|.|||.|..|:|||:||||| __ 5' CUGGUUACUUGUUUUAUGCUGUA 3' ENST00000306315 E:-18.23 S:118.000000 Loc:857 Cons: 95.65%(mmu) 95.65%(rno)	3' ACCGUAAGUGG-CGCACGGAAUU 5' hsa-mir-124a __ ||.:||.:|:|.|:||||||.|| __ 5' UGUUAUGUAUCAGUGUGCCUGAA 3' ENST00000306315 E:-19.219999 S:110.000000 Loc:412 Cons: 91.30%(mmu) 91.30%(rno)	3' UGACA-U-GUUUGAUGAUGGAGU 5' hsa-let-7g __ :||||.|.:|||||.||:::|:| __ 5' GCUGUAAUUAAACUUCUGUUUUA 3' ENST00000306315 E:-18.290001 S:98.000000 Loc:161 Cons: 91.30%(mmu) %(rno)	3' GUCGGCGACAGUGUGCGUGUC 5' hsa-mir-210 __ |||..||..||:|||.||||| __ 5' CAG--GC--UCGCACACACAG 3' ENST00000306315 E:-19.639999 S:98.000000 Loc:268 Cons: %(mmu) 100.00%(rno)	3' UGCCUUCCCGU-CUCUCCCGGUC 5' rno-mir-328 __ .:||||.||||.|:|:..||||| __ 5' UUGGAA-GGCAUGGGGUUGCCAG 3' ENST00000306315 E:-28.75 S:92.000000 Loc:605 Cons: %(mmu) 95.45%(rno)
ENST00000305476	ENSG00000168758	SEMA4C	1		ENSMUSG00000026121	ENSRNOG00000016254	SEMA DOMAIN, IMMUNOGLOBULIN DOMAIN (IG), TRANSMEMBRANE DOMAIN TM; SEMAF; SEMACL1. [Source:RefSeq;Acc:NM_017789] ENSG00000168758 (-1) (97010235 97011119 97017423 97017423 97008509) 884 (884 nt) HUGO:10731:M-Sema F Semacl1 Semaf SEMAI [IPR001627:Semaphorin/CD100 antigen; IPR002165:Plexin;]	6	-146.94	619	ENSMUSG00000026121 (mmu-let-7d)	ENSRNOG00000016254 (rno-let-7d)	hsa-let-7d hsa-let-7e hsa-let-7b hsa-let-7c hsa-mir-125a hsa-mir-135 hsa-mir-138 hsa-mir-17_5p hsa-mir-205 hsa-mir-214 rno-mir-324_3p rno-mir-328 hsa-mir-34a rno-mir-351	hsa-mir-34a rno-mir-351 rno-mir-328 hsa-mir-135 hsa-mir-214 hsa-mir-125a	0004872 receptor activity IEA; 0007275 development IEA; 0016020 membrane IEA;	3' UGUUGGUCGAUUCUGUGACGGU 5' hsa-mir-34a __ .::.:||||..:|:|||||||| __ 5' CUGCUCAGCACGGGCACUGCCA 3' ENST00000305476 E:-26.299999 S:115.000000 Loc:148 Cons: 95.45%(mmu) 95.45%(rno)	3' GUCCGAGUUUCCCGA-GGAGUCCCU 5' rno-mir-351 __ |||||.|..|..|||.||||||||| __ 5' CAGGCAC-CA--GCUACCUCAGGGA 3' ENST00000305476 E:-29.35 S:110.000000 Loc:56 Cons: 95.45%(mmu) 95.45%(rno)	3' UGCCUUCCCGUCUCUCCCGGUC 5' rno-mir-328 __ :.|||||||::|:.:|||||.. __ 5' GGGGAAGGGUGGGUGGGGCCUC 3' ENST00000305476 E:-31.879999 S:101.000000 Loc:631 Cons: %(mmu) 90.91%(rno)	3' AGUGUAUCCUUAUUUUUCGGUAU 5' hsa-mir-135 __ .:|::.|||::.||:::|:|:|| __ 5' CUAUGAAGGGG-AAGGGGUCGUA 3' ENST00000305476 E:-18.040001 S:99.000000 Loc:422 Cons: 90.91%(mmu) 90.91%(rno)	3' GACGGACAGACACGGACG-ACA 5' hsa-mir-214 __ .||::|||.||||:.||:.||| __ 5' GUGUUUGUGUGUGUGUGUAUGU 3' ENST00000305476 E:-21.940001 S:97.000000 Loc:309 Cons: 90.91%(mmu) %(rno)	3' GUGUCCA-AUUUCCCAGAGUCCCU 5' hsa-mir-125a __ :|.:|.|.|:||.|.|:||||||. __ 5' UAGGGCUGUGAAUGUUUUCAGGGU 3' ENST00000305476 E:-19.43 S:97.000000 Loc:571 Cons: 91.67%(mmu) 91.67%(rno)
ENST00000334372	ENSG00000175582	RAB6A	1		ENSMUSG00000030704	ENSRNOG00000018176	RAS-RELATED PROTEIN RAB-6A (RAB-6). [Source:SWISSPROT;Acc:P20340] ENSG00000175582 (-1) (73113249 73115251 73117073 73198431 73035537) 1967 (1967 nt) HUGO:9786:RAB6 [IPR001687:ATP/GTP-binding site motif A (P-loop); IPR001806:Ras GTPase superfamily;]	6	-119.97	615	ENSMUSG00000030704 (mmu-miR-107)	ENSRNOG00000018176 (mmu-miR-107)	hsa-mir-107 hsa-mir-127 hsa-mir-130b hsa-mir-15a hsa-mir-181a hsa-mir-181b hsa-mir-199a* hsa-mir-199a hsa-mir-206	hsa-mir-199a* hsa-mir-206 hsa-mir-199a hsa-mir-107 hsa-mir-130b hsa-mir-127	0003928 RAB small monomeric GTPase activity TAS; 0005525 GTP binding IEA; 0008565 protein transporter activity IEA; 0006886 intracellular protein transport IEA; 0006899 nonselective vesicle transport TAS; 0007264 small GTPase mediated signal transduction IEA; 0005794 Golgi apparatus IEA;	3' UUGGUUACACGUCUGAUGACAU 5' hsa-mir-199a* __ |:::|.||||.|||:|:||||: __ 5' AGUUAUUGUG-AGAUUGCUGUG 3' ENST00000334372 E:-22.209999 S:117.000000 Loc:1500 Cons: 100.00%(mmu) 100.00%(rno)	3' GGUGUGUGAAGGAA-UGUAAGGU 5' hsa-mir-206 __ ..|:|||:||:|||.|||||::. __ 5' AGAUACAUUUUCUUAACAUUUUU 3' ENST00000334372 E:-19.35 S:108.000000 Loc:219 Cons: 95.65%(mmu) 95.65%(rno)	3' UUGUCCAUCAGACUUGUGACCC 5' hsa-mir-199a __ :||..|.|||.||||:|:|||. __ 5' GAC-UGCAGUGUGAAUAUUGGC 3' ENST00000334372 E:-17.809999 S:103.000000 Loc:28 Cons: 100.00%(mmu) %(rno)	3' ACUAUCGGGACAUGUUACGACGA 5' hsa-mir-107 __ .|||:|..:||||.|:||||.:| __ 5' GGAUGGAGUUGUAAAGUGCUUUU 3' ENST00000334372 E:-19.51 S:99.000000 Loc:1857 Cons: 100.00%(mmu) 95.65%(rno)	3' UACGGGAAAGUAGUAACG--UGAC 5' hsa-mir-130b __ ||..|..|||||||||||...||| __ 5' AUUGCAAUUCAUCAUUGCUGCCUG 3' ENST00000334372 E:-21.799999 S:97.000000 Loc:77 Cons: 91.67%(mmu) 91.67%(rno)	3' UCGGUUCGAGUCUGCCUAGGCU 5' hsa-mir-127 __ ..|:.:|.|:..|:|||||:|| __ 5' CACUUGGAUU--AUGGAUCUGA 3' ENST00000334372 E:-19.290001 S:91.000000 Loc:1778 Cons: 100.00%(mmu) 100.00%(rno)
ENST00000294624_P	ENSG00000162614		1		ENSMUSG00000039103	ENSRNOG00000012512	LIKELY ORTHOLOG OF RAT F-ACTIN BINDING PROTEIN NEXILIN. [Source:RefSeq;Acc:NM_144573] ENSG00000162614 (1) (77776922 77806429 77831107 77831107 77893230) 4001 (4001 nt) [IPR007110:Immunoglobulin-like; IPR001472:Bipartite nuclear localization signal;]	6	-122.78	614		ENSRNOG00000012512 (rno-let-7d)	hsa-let-7d hsa-mir-106b hsa-mir-18 hsa-mir-302 hsa-mir-34c hsa-mir-34a rno-mir-342	hsa-mir-34a hsa-mir-302 hsa-mir-34c rno-mir-342 97 hsa-mir-18	0005554 molecular_function unknown ND; 0000004 biological_process unknown ND; 0008372 cellular_component unknown ND;	3' UGUUGGUCGAUUCUGUGACGGU 5' hsa-mir-34a __ :||.|:..|||||||||||::. __ 5' GCAUCUCCCUAAGACACUGUUC 3' ENST00000294624_P E:-22.02 S:113.000000 Loc:1367 Cons: %(mmu) 100.00%(rno)	3' AGUGGUUUUGUACCUUCGUGAAU 5' hsa-mir-302 __ |:|.||:..|||||||.||:||| __ 5' UUAACAGUUCAUGGAA-CAUUUA 3' ENST00000294624_P E:-20.049999 S:108.000000 Loc:2535 Cons: %(mmu) 95.45%(rno)	3' GUUA-GUCGAUUGAUGUGACGGA 5' hsa-mir-34c __ .|:|.:|..|||:|:|||||::| __ 5' AAGUAUAAAUAAUUGCACUGUUU 3' ENST00000294624_P E:-17.66 S:106.000000 Loc:3753 Cons: %(mmu) 95.65%(rno)	3' CUGCCCACGCUAAAGACACACUCU 5' rno-mir-342 __ .||||||...:|||||||..|||| __ 5' CACGGGU--AGUUUCUGU-AGAGA 3' ENST00000294624_P E:-23.889999 S:97.000000 Loc:1429 Cons: %(mmu) 100.00%(rno)	3' UGAUACG-UUGGAUGAUGGAGA 5' hsa-let-7d __ ::|:|||..||||:.|:|:|:| __ 5' GUUGUGCUUACCUGGUGCUUUU 3' ENST00000294624_P E:-21.34 S:95.000000 Loc:3689 Cons: %(mmu) 90.91%(rno)	3' AUAGACGUGAUCUACGUGGAAU 5' hsa-mir-18 __ .||:|.||||.|||||||.|.. __ 5' CAUUU-CACU-GAUGCACAUGC 3' ENST00000294624_P E:-17.82 S:95.000000 Loc:3107 Cons: %(mmu) 100.00%(rno)
ENST00000274542	ENSG00000145860		1		ENSMUSG00000019189	ENSRNOG00000004602	ENSG00000145860 (-1) (158565314 158566573 158615702 158615702 158507382) 1259 (1259 nt) [IPR001841:Zn-finger, RING;]	6	-116.43	609	ENSMUSG00000019189 (mmu-miR-125a)	ENSRNOG00000004602 (mmu-miR-148a)	hsa-mir-125a mmu-mir-148a hsa-mir-148 hsa-mir-17_5p hsa-mir-181a hsa-mir-181c hsa-mir-181b hsa-mir-24 rno-mir-324_3p rno-mir-330 rno-mir-340	mmu-mir-148a hsa-mir-181a rno-mir-340 hsa-mir-17_5p hsa-mir-24 rno-mir-330		3' UGUUUCAAGACAUCACGUGACU 5' mmu-mir-148a __ :.:|||..||.|||.||||||| __ 5' GGGAAGGGCUUUAGGGCACUGA 3' ENST00000274542 E:-20.16 S:112.000000 Loc:805 Cons: %(mmu) 95.45%(rno)	3' UGAGUGGCUGUCGCAACUUACAA 5' hsa-mir-181a __ |||.||.||||..|.|||||||. __ 5' ACUGACAGACAUAGCUGAAUGUC 3' ENST00000274542 E:-19.67 S:104.000000 Loc:1213 Cons: 100.00%(mmu) 95.65%(rno)	3' CCGAUAUUUCAU--UGACUCUGCCU 5' rno-mir-340 __ |||||..|:|||..||||:|:.||: __ 5' GGCUA-CAGGUAGAACUGGGGAGGG 3' ENST00000274542 E:-22.709999 S:102.000000 Loc:1037 Cons: 91.67%(mmu) %(rno)	3' UGAUGGACGUGACAUUCGUGAAAC 5' hsa-mir-17_5p __ |:||.:.|||.|.|..|||||||| __ 5' AUUA-UGGCAAUAUUUGCACUUUG 3' ENST00000274542 E:-17.33 S:100.000000 Loc:896 Cons: %(mmu) 91.30%(rno)	3' GACAAGGACGACUUGACUCGGU 5' hsa-mir-24 __ :..|||:|||..||||||.:|| __ 5' UAAUUCUUGC--AACUGAAUCA 3' ENST00000274542 E:-18.290001 S:98.000000 Loc:867 Cons: 100.00%(mmu) %(rno)	3' AGAGACGUCCGGGACACGAAACG 5' rno-mir-330 __ .||:||||...|||.|.|||||. __ 5' ACUUUGCA---CCUUUUCUUUGA 3' ENST00000274542 E:-18.27 S:93.000000 Loc:981 Cons: %(mmu) 90.00%(rno)
ENST00000306105	ENSG00000164442	CITED2	1		ENSMUSG00000039910	ENSRNOG00000012193	CBP/P300-INTERACTING TRANSACTIVATOR 2 (MSG-RELATED PROTEIN 1) (MRG1 PROTEIN) (P35SRJ). [Source:SWISSPROT;Acc:Q99967] ENSG00000164442 (-1) (139673972 139674839 139675651 139676327 139593718) 867 (867 n HUGO:1987:MRG1 [IPR007576:CITED;]	6	-118.99	608	ENSMUSG00000039910 (mmu-let-7a)	ENSRNOG00000012193 (mmu-let-7a)	hsa-let-7a hsa-let-7e hsa-let-7b hsa-let-7f hsa-let-7c hsa-mir-122a hsa-mir-130b rno-mir-135b hsa-mir-153 hsa-mir-17_5p hsa-mir-193 hsa-mir-210 hsa-mir-301 hsa-mir-320 hsa-mir-sf202_seth	hsa-mir-301 hsa-mir-17_5p hsa-mir-210 hsa-mir-153 hsa-mir-193	0003700 transcription factor activity TAS; 0005515 protein binding NAS; 0006357 regulation of transcription from Pol II promoter TAS; 0005634 nucleus NAS;	3' UUGGUGUGUUGGAUGAUGGAGU 5' hsa-let-7b __ .||::|||||.||:|.|:|||: __ 5' UACUGCACAAACUGCCAUCUCG 3' ENST00000306105 E:-23.1 S:112.000000 Loc:449 Cons: 100.00%(mmu) %(rno)	3' CGAAACUGUUAUGAUAACGUGAC 5' hsa-mir-301 __ .:|||||||:||:|.|||:||.. __ 5' AUUUUGACAGUAUUUUUGUACAA 3' ENST00000306105 E:-22.24 S:111.000000 Loc:779 Cons: 100.00%(mmu) 100.00%(rno)	3' UGAUGGACGUGACAUUCGUGAAAC 5' hsa-mir-17_5p __ ||||.|||:::||.||||.:|||. __ 5' ACUA-CUGUGUUGAAAGCUUUUUA 3' ENST00000306105 E:-17.42 S:105.000000 Loc:751 Cons: 100.00%(mmu) 100.00%(rno)	3' GUCGGCGACAGUGUGCGUGUC 5' hsa-mir-210 __ |..||.|...||:|:|:|||| __ 5' CCCCCACCCCCAUAUGUACAG 3' ENST00000306105 E:-18.700001 S:95.000000 Loc:617 Cons: 90.48%(mmu) %(rno)	3' AGUGAAAACACUGAUACG-UU 5' hsa-mir-153 __ .||:|||||..|||:|||.|| __ 5' ACAUUUUUGACACUGUGCUAA 3' ENST00000306105 E:-18.32 S:93.000000 Loc:705 Cons: 95.24%(mmu) 95.24%(rno)	3' GAC-CCUGAAACAUCCGGUCAA 5' hsa-mir-193 __ :||.|||:||||||.|.::||| __ 5' UUGUGGAUUUUGUA-GAUGGUU 3' ENST00000306105 E:-19.209999 S:92.000000 Loc:344 Cons: 95.24%(mmu) 95.24%(rno)
ENST00000295108	ENSG00000162992	NEUROD1	1		ENSMUSG00000034701	ENSRNOG00000005609	NEUROGENIC DIFFERENTIATION FACTOR 1 (NEUROD1) (NEUROD). [Source:SWISSPROT;Acc:Q13562] ENSG00000162992 (-1) (182743738 182745060 182746130 182747797 181060730) 1322 (1322 nt) HUGO:7762:BETA2 BHF-1 NeuroD [IPR001092:Basic helix-loop-helix dimerization domain bHLH; IPR001472:Bipartite nuclear localization signal;]	6	-110.51	607	ENSMUSG00000034701 (mmu-let-7b)	ENSRNOG00000005609 (mmu-let-7b)	hsa-let-7b hsa-let-7a hsa-let-7c hsa-mir-103 hsa-mir-15a hsa-mir-199b hsa-mir-199a hsa-mir-25 hsa-mir-301 hsa-mir-34c hsa-mir-98 hsa-mir-sf202_seth	hsa-mir-301 hsa-mir-98 hsa-mir-103 hsa-mir-34c hsa-mir-199a 94	0003677 DNA binding IEA; 0003702 RNA polymerase II transcription factor activity TAS; 0006355 regulation of transcription, DNA-dependent IEA; 0007399 neurogenesis IEA; 0030154 cell differentiation IEA; 0005634 nucleus IEA;	3' CGAAAC-UGUUAU-GAUAACGUGAC 5' hsa-mir-301 __ ..||.|.||||||.||||||||.|| __ 5' AAUUAGAACAAUAGCUAUUGCA-UG 3' ENST00000295108 E:-17.290001 S:110.000000 Loc:1145 Cons: %(mmu) 91.67%(rno)	3' UUGU--UAUGUUGAAUGAUGGAGU 5' hsa-mir-98 __ |:||...|||.||||::|||||:. __ 5' AGCAUUUUACUACUUGUUACCUUU 3' ENST00000295108 E:-19.17 S:108.000000 Loc:397 Cons: %(mmu) 91.67%(rno)	3' AGUAUCGGGACAUGUU-ACGACGA 5' hsa-mir-103 __ .::.||:||.|.|:||.|||||:| __ 5' AUGCAGUCCAGAAUAAGUGCUGUU 3' ENST00000295108 E:-18.5 S:104.000000 Loc:1172 Cons: 95.83%(mmu) 95.83%(rno)	3' GUUAGUCGAUUGAUGUGACGGA 5' hsa-mir-34c __ :|:..||:|.|:|::::||||| __ 5' UAGAAAGUU-AUUGUGUUGCCU 3' ENST00000295108 E:-17.129999 S:97.000000 Loc:597 Cons: 95.24%(mmu) 95.24%(rno)	3' UUGUCCAUCAGACUUGUGACCC 5' hsa-mir-199a __ |.|||||..|.|.||:::|||| __ 5' AUCAGGU--UGUUAAUGUUGGG 3' ENST00000295108 E:-20.58 S:95.000000 Loc:1061 Cons: 95.00%(mmu) %(rno)	3' UUGGUGUGUUGGAUGA-UGGAGU 5' hsa-let-7b __ :|:||.|...|||::|.||||:| __ 5' GAUCAAAGUUCCUGUUCACCUUA 3' ENST00000295108 E:-17.84 S:93.000000 Loc:167 Cons: 95.65%(mmu) 95.65%(rno)
ENST00000307803	ENSG00000171862	PTEN	1		ENSMUSG00000013663	ENSRNOG00000020723	PHOSPHATIDYLINOSITOL-3,4,5-TRISPHOSPHATE 3-PHOSPHATASE PTEN (EC 3.1.3.67) (MUTATED IN MULTIPLE ADVANCED CANCERS 1). [Source:SWISSPROT;Acc:O00633] ENSG00000171862 (1) (89287772 89288804 89389806 893907 HUGO:9588:BZS MHAM MMAC1 TEP1 [IPR000387:Tyrosine specific protein phosphatase and dual specificity protein phosphatase;]	6	-127.43	598	ENSMUSG00000013663 (mmu-miR-135)	ENSRNOG00000020723 (rno-let-7d)	hsa-let-7d hsa-mir-135 hsa-mir-198 mmu-mir-298 hsa-mir-320 rno-mir-326 hsa-mir-sf202_seth	hsa-mir-135 hsa-mir-320 mmu-mir-298 98 hsa-mir-198 rno-mir-326	0004440 phosphatidylinositol-3,4-bisphosphate 4-phosphatase IEA; 0004725 protein tyrosine phosphatase activity TAS; 0016314 phosphatidylinositol-3,4,5-trisphosphate 3-phosphatase activity IEA; 0016787 hydrolase activity IEA; 0000079 regulation of CDK activity TAS; 0006470 protein amino acid dephosphorylation TAS; 0007275 development TAS; 0008283 cell proliferation TAS; 0045786 negative regulation…	3' AGUGUAUCCUUAUUUUUCGGUAU 5' hsa-mir-135 __ |||.|.|||:||||||..||||: __ 5' UCA-AGAGGGAUAAAACACCAUG 3' ENST00000307803 E:-19.360001 S:108.000000 Loc:11 Cons: 95.45%(mmu) %(rno)	3' AAGCGGGAGAGUUGGGUCGAAAA 5' hsa-mir-320 __ ||:.||.|:|:|.:||||:|||. __ 5' UUUCCCGUUUUAUUCCAGUUUUA 3' ENST00000307803 E:-20.41 S:107.000000 Loc:275 Cons: 95.65%(mmu) 95.65%(rno)	3' CCUUCUUGUCGGGAGGAGACGG 5' mmu-mir-298 __ ..|:|||||.::|||:|:|.|: __ 5' AUAGGAACAAUUCUCUUUUCCU 3' ENST00000307803 E:-22.59 S:101.000000 Loc:111 Cons: 95.45%(mmu) 95.45%(rno)	3' UGAUACGUUGGAUG-AUGGAGA 5' hsa-let-7d __ :||:||:.|:.||:.|||||:| __ 5' GCUGUGUCAUGUAUAUACCUUU 3' ENST00000307803 E:-17.65 S:96.000000 Loc:203 Cons: %(mmu) 95.45%(rno)	3' GGAUAGAGGGGAGACCUGG 5' hsa-mir-198 __ ||||...|||||:||.||: __ 5' CCUA---CCCCUUUGCACU 3' ENST00000307803 E:-19.120001 S:95.000000 Loc:402 Cons: 100.00%(mmu) %(rno)	3' UGACCUCCUUCCCGGGUC--UCC 5' rno-mir-326 __ |.||||||:|..||:|||..||| __ 5' AAUGGAGGGAAUGCUCAGAAAGG 3' ENST00000307803 E:-28.299999 S:91.000000 Loc:503 Cons: 91.30%(mmu) %(rno)
ENST00000314425	ENSG00000147130	ZNF261	1		ENSMUSG00000031310	ENSRNOG00000003707	ZINC FINGER PROTEIN 261 (DXS6673E PROTEIN). [Source:SWISSPROT;Acc:Q14202] ENSG00000147130 (-1) (69326265 69327557 69339896 69339896 69198195) 1292 (1292 nt) HUGO:13054:DXS6673E KIAA0385 MYM ZNF198L2 []	6	-126.51	593	ENSMUSG00000031310 (mmu-miR-103)	ENSRNOG00000003707 (mmu-miR-103)	hsa-mir-103 hsa-mir-107 hsa-mir-199a* hsa-mir-214 hsa-mir-24 hsa-mir-34a hsa-mir-361	hsa-mir-199a* hsa-mir-103 hsa-mir-34a hsa-mir-214 hsa-mir-24 hsa-mir-214	0003677 DNA binding TAS; 0007275 development TAS; 0016021 integral to membrane IEA;	3' UUGGUUACACGUCUGAUGACAU 5' hsa-mir-199a* __ ..|::.||||||||||.||||. __ 5' UCCUGUUGUGCAGACUCCUGUC 3' ENST00000314425 E:-25.67 S:115.000000 Loc:704 Cons: 95.45%(mmu) %(rno)	3' AGUAUCGGGACAUGUUACGACGA 5' hsa-mir-103 __ |.|||||:|||.:::||.|||:| __ 5' UAAUAGCUCUG-GUGAUCCUGUU 3' ENST00000314425 E:-19.66 S:106.000000 Loc:310 Cons: 95.45%(mmu) 95.45%(rno)	3' UGUUGGUCGAUUCUGUGACGGU 5' hsa-mir-34a __ ::.|||||:|.||.|||||::. __ 5' GUCACCAGUU-AGCCACUGUUU 3' ENST00000314425 E:-21.09 S:97.000000 Loc:1130 Cons: %(mmu) 90.48%(rno)	3' GACGGACAGACACGGACGACA 5' hsa-mir-214 __ :|.|||||.||..::|||||| __ 5' UUCCCUGU-UGACUUUGCUGU 3' ENST00000314425 E:-19.139999 S:92.000000 Loc:1079 Cons: 95.00%(mmu) 95.00%(rno)	3' GACAAGGACGACUUGACUCGGU 5' hsa-mir-24 __ ||||.|||.|...|.||||||| __ 5' CUGUCCCUUC---AGUGAGCCA 3' ENST00000314425 E:-18.99 S:92.000000 Loc:1182 Cons: 94.74%(mmu) 94.74%(rno)	3' GACGGACAGACACGGACGACA 5' hsa-mir-214 __ ||||||.|||.||||..|||| __ 5' CUGCCU-UCUCUGCC--CUGU 3' ENST00000314425 E:-21.959999 S:91.000000 Loc:406 Cons: 100.00%(mmu) 100.00%(rno)
ENST00000330823	ENSG00000183182	SPRY4	1		ENSMUSG00000024427	ENSRNOG00000013851	SPROUTY HOMOLOG 4 (SPRY-4). [Source:SWISSPROT;Acc:Q9C004] ENSG00000183182 (-1) (141718506 141722275 141723228 141733067 141421094) 3769 (3769 nt) HUGO:15533: [IPR007875:Sprouty;]	6	-127.57	593	ENSMUSG00000024427 (mmu-miR-291_5p)	ENSRNOG00000013851 (mmu-miR-291_3p)	mmu-mir-291_5p mmu-mir-291_3p mmu-mir-292_5p rno-mir-339 hsa-mir-34a hsa-mir-98	hsa-mir-98 mmu-mir-292_5p mmu-mir-291_5p mmu-mir-291_3p rno-mir-339 hsa-mir-34a	0007275 development IEA; 0016020 membrane IEA;	3' UUGUUAUGUUGAAUGAUGGAGU 5' hsa-mir-98 __ ||:||.|||||||::|.|||:. __ 5' AAUAAAACAACUUGUUUCCUUU 3' ENST00000330823 E:-17.93 S:110.000000 Loc:969 Cons: 90.91%(mmu) 90.91%(rno)	3' GUUUUCUCGG-GGGUCAAACUCA 5' mmu-mir-292_5p __ :..|:|:|||.|:.:|||||||. __ 5' UCCAGGGGCCACUGGGUUUGAGC 3' ENST00000330823 E:-24.040001 S:98.000000 Loc:1327 Cons: 91.30%(mmu) 91.30%(rno)	3' UCUCUCCCGGAGGUGAAACUAC 5' mmu-mir-291_5p __ ||.|:....:|.|||||||:|| __ 5' AGUGGCAAGUUGCACUUUGGUG 3' ENST00000330823 E:-20.549999 S:97.000000 Loc:2169 Cons: 95.45%(mmu) %(rno)	3' CCGUGUGUUUCA-CC-UUCGUGAAA 5' mmu-mir-291_3p __ .||||::..|||.||.|:|:||||. __ 5' AGCACGUCCAGUGGGUAGGUACUUG 3' ENST00000330823 E:-23.540001 S:97.000000 Loc:1442 Cons: %(mmu) 92.00%(rno)	3' ACUCGAGGACCUCCUGUCCCU 5' rno-mir-339 __ |||....:|||||||.||||| __ 5' UGA----UUGGAGGA-AGGGA 3' ENST00000330823 E:-23.27 S:97.000000 Loc:1801 Cons: 100.00%(mmu) %(rno)	3' UGUUGGUCGAUUCUGUGACGGU 5' hsa-mir-34a __ |||:||..|.|||||::.||.| __ 5' ACAGCCCUCAAAGACGUAGCAA 3' ENST00000330823 E:-18.24 S:94.000000 Loc:1382 Cons: %(mmu) 95.45%(rno)
ENST00000265593_P	ENSG00000114859	CLCN2	1		ENSMUSG00000022843	ENSRNOG00000001742	CHLORIDE CHANNEL PROTEIN 2 (CLC-2). [Source:SWISSPROT;Acc:P51788] ENSG00000114859 (-1) (185385307 185385307 185400180 185400180 185300165) 4001 (4001 nt) HUGO:2020:CLC2 [IPR001807:Cl- channel, voltage gated; IPR002244:Chloride channel CLC-2; IPR000644:CBS domain;]	6	-139.52	580	ENSMUSG00000022843 (mmu-miR-17_5p)	ENSRNOG00000001742 (mmu-miR-17_5p)	hsa-mir-17_5p hsa-mir-20 mmu-mir-297 hsa-mir-302 rno-mir-326 rno-mir-336 rno-mir-339 rno-mir-343 hsa-mir-93	rno-mir-326 hsa-mir-302 rno-mir-336 rno-mir-343 rno-mir-339 mmu-mir-297	0005247 voltage-gated chloride channel activity TAS; 0006811 ion transport IEA; 0006821 chloride transport IEA; 0005624 membrane fraction NR; 0005887 integral to plasma membrane NR;	3' UGACCUCCUUCCCGGGUCUCC 5' rno-mir-326 __ :|||.||..|.|.|||||||| __ 5' GCUGUAGCCAUGCCCCAGAGG 3' ENST00000265593_P E:-22.49 S:101.000000 Loc:1382 Cons: 95.24%(mmu) 100.00%(rno)	3' AGUGGUUUUGUACCUU-CGUGAAU 5' hsa-mir-302 __ ...|||::.::.||||.||||||. __ 5' GGCCCAGGCUGCGGAAGGCACUUU 3' ENST00000265593_P E:-21.17 S:101.000000 Loc:1849 Cons: 91.67%(mmu) 91.67%(rno)	3' UCUGAUCUAUA-CCUUCCCACU 5' rno-mir-336 __ |||..||:.||.||:||||||: __ 5' AGA-GAGGCAUGGGGAGGGUGG 3' ENST00000265593_P E:-24.190001 S:100.000000 Loc:1233 Cons: %(mmu) 90.48%(rno)	3' UGACC-CGUGUGCCUCCCUCU 5' rno-mir-343 __ .||||.|||||.|..|||||| __ 5' CCUGGCGCACAGGCCGGGAGA 3' ENST00000265593_P E:-28.76 S:94.000000 Loc:2033 Cons: %(mmu) 95.24%(rno)	3' ACUCGAGGACCUCCUGUCCCU 5' rno-mir-339 __ .|:|:.:||.|:|||||.||. __ 5' AGGGUGUCU-GGGGACACGGU 3' ENST00000265593_P E:-25.07 S:93.000000 Loc:1981 Cons: 95.00%(mmu) %(rno)	3' GUACGUGUACGUGUGUAUGUA 5' mmu-mir-297 __ ||.||||.||||||::.||.. __ 5' CAAGCAC-UGCACAUGGACUC 3' ENST00000265593_P E:-17.84 S:91.000000 Loc:1188 Cons: 95.00%(mmu) 95.00%(rno)
ENST00000332496_P	ENSG00000185033	SEMA4B	1		ENSMUSG00000030539	ENSRNOG00000025167	SEMAPHORIN 4B PRECURSOR. [Source:SWISSPROT;Acc:Q9NPR2] ENSG00000185033 (1) (88474594 88474594 88501643 88501643 88479571) 4001 (4001 nt) HUGO:10730:KIAA1745 SEMAC SemC [IPR001627:Semaphorin/CD100 antigen; IPR002165:Plexin;]	5	-106.43	566	ENSMUSG00000030539 (mmu-miR-141)	ENSRNOG00000025167 (mmu-miR-141)	hsa-mir-141 hsa-mir-143 hsa-mir-15a hsa-mir-18 hsa-mir-184 hsa-mir-21 rno-mir-337	hsa-mir-143 rno-mir-337 hsa-mir-18 hsa-mir-184 hsa-mir-141	0004872 receptor activity IEA; 0007275 development IEA; 0007399 neurogenesis IEA; 0016021 integral to membrane IEA;	3' ACUCGAUGUCACGAAGUAGAGU 5' hsa-mir-143 __ ||||||.....||||||||||| __ 5' UGAGCU-----GCUUCAUCUCA 3' ENST00000332496_P E:-24.65 S:124.000000 Loc:2459 Cons: %(mmu) 100.00%(rno)	3' UUUCCG-UAGUAUAUCCUCGACUU 5' rno-mir-337 __ .|:|.|.|||.||.|||||||||| __ 5' CAGGACAAUCUUAAAGGAGCUGAA 3' ENST00000332496_P E:-24.860001 S:122.000000 Loc:1844 Cons: %(mmu) 91.67%(rno)	3' AUAGACGUGAUCUACGUGGAAU 5' hsa-mir-18 __ |.|:|..|:.||||||||:||| __ 5' UUUUUUAAUAAGAUGCACUUUA 3' ENST00000332496_P E:-17.32 S:121.000000 Loc:957 Cons: 100.00%(mmu) 100.00%(rno)	3' UGGGAAUAGUCAAGAGGCAGGU 5' hsa-mir-184 __ :|:|..:||..|||||:||:|| __ 5' GCUCAGGUC--UUCUCUGUUCA 3' ENST00000332496_P E:-20.67 S:108.000000 Loc:2529 Cons: %(mmu) 95.00%(rno)	3' GGU-AGAAAUGGUCUGUCACAA 5' hsa-mir-141 __ |||..||.||:|||:|.|||.. __ 5' CCAGCCUGUAUCAGGCUGUGGC 3' ENST00000332496_P E:-18.93 S:91.000000 Loc:642 Cons: 95.45%(mmu) 95.45%(rno)
ENST00000266269	ENSG00000100105	ZNF278	1		ENSMUSG00000020453	ENSRNOG00000018709	ZINC FINGER PROTEIN 278 LONG C ISOFORM; POZ-AT HOOK-ZINC FINGER PROTEIN; MAZ-RELATED FACTOR; BTB-POZ DOMAIN ZINC FINGER TRANSCRIPTION FACTOR. [Source:RefSeq;Acc:NM_014323] ENSG00000100105 (-1) (300463 HUGO:13071:dJ400N23 [IPR007087:Zn-finger, C2H2 type; IPR000637:HMG-I and HMG-Y DNA-binding domain (A+T-hook); IPR000515:Binding-protein-dependent transport systems inner membrane component; IPR00021…	5	-114.27	549		ENSRNOG00000018709 (mmu-miR-122a)	hsa-mir-122a hsa-mir-134 rno-mir-140* hsa-mir-18 hsa-mir-212 rno-mir-323 rno-mir-343	rno-mir-323 hsa-mir-134 hsa-mir-18 rno-mir-343 hsa-mir-212	0003677 DNA binding NAS; 0005215 transporter activity IEA; 0005515 protein binding IEA; 0000004 biological_process unknown ND; 0006355 regulation of transcription, DNA-dependent IEA; 0006810 transport IEA; 0005634 nucleus NAS; 0016020 membrane IEA; 0003677 DNA binding IEA; 0005634 nucleus IEA;	3' UCUCCAGCUGGCACAUUACACG 5' rno-mir-323 __ ..||||:||||.|||:|||||. __ 5' CCAGGUUGACCUUGUGAUGUGA 3' ENST00000266269 E:-30.32 S:120.000000 Loc:1022 Cons: %(mmu) 100.00%(rno)	3' GGGAGACCAGUUGG--UCAGUGU 5' hsa-mir-134 __ |:||:|.||.||||..||||||| __ 5' CUCUUU-GUAAACCGCAGUCACA 3' ENST00000266269 E:-22.709999 S:113.000000 Loc:781 Cons: %(mmu) 90.91%(rno)	3' AUAGACGUGAUCUACGUGGAAU 5' hsa-mir-18 __ ..|:||:.:||||||:|||.|| __ 5' ACUUUGU-UUAGAUGUACCAUA 3' ENST00000266269 E:-18.65 S:111.000000 Loc:823 Cons: %(mmu) 95.24%(rno)	3' UGACCCGUGUGCCUCCCUCU 5' rno-mir-343 __ :|||.|.|::||||||||.: __ 5' GCUGUGAAUGCGGAGGGAAG 3' ENST00000266269 E:-24.040001 S:107.000000 Loc:51 Cons: %(mmu) 100.00%(rno)	3' CCGGCACUGAC-CUCUGACAAU 5' hsa-mir-212 __ ..|:||.:|||.||||:|.||| __ 5' UUCUGUAGCUGAGAGAUUUUUA 3' ENST00000266269 E:-18.549999 S:98.000000 Loc:84 Cons: %(mmu) 95.45%(rno)
ENST00000259349	ENSG00000136826	KLF4	1		ENSMUSG00000003032	ENSRNOG00000016299	KRUPPEL-LIKE FACTOR 4 (EPITHELIAL ZINC-FINGER PROTEIN EZF) (GUT- ENRICHED KRUEPPEL-LIKE FACTOR). [Source:SWISSPROT;Acc:O43474] ENSG00000136826 (-1) (105626973 105627870 105631147 105631593 105600426) HUGO:6348:EZF GKLF [IPR007087:Zn-finger, C2H2 type;]	5	-110.84	544	ENSMUSG00000003032 (mmu-let-7f)	ENSRNOG00000016299 (mmu-let-7f)	hsa-let-7f hsa-let-7e hsa-mir-10a hsa-mir-103 hsa-mir-107 hsa-mir-136 rno-mir-140* hsa-mir-148 mmu-mir-148a rno-mir-148b hsa-mir-152 hsa-mir-19a hsa-mir-19b hsa-mir-29a rno-mir-330	hsa-mir-136 hsa-mir-152 108 hsa-mir-103 hsa-mir-10a	0003700 transcription factor activity TAS; 0006355 regulation of transcription, DNA-dependent IEA; 0007500 mesoderm cell fate determination TAS; 0008285 negative regulation of cell proliferation TAS; 0005634 nucleus IEA;	3' AGGUAGUAGUUUUGUUUACCUCA 5' hsa-mir-136 __ ...||||..|:||||:||||:|| __ 5' AAAAUCA-AAGAACAGAUGGGGU 3' ENST00000259349 E:-22.219999 S:119.000000 Loc:181 Cons: 95.45%(mmu) 95.45%(rno)	3' GGUUCAAGACAGUACGUGACU 5' hsa-mir-152 __ ...||.|||||:||||||||. __ 5' GACAG-UCUGUUAUGCACUGU 3' ENST00000259349 E:-25.98 S:116.000000 Loc:646 Cons: 100.00%(mmu) 100.00%(rno)	3' UGAUAUGUUGGAGGAUGGAGU 5' hsa-let-7e __ .|||||:|:::.|:|:|||:| __ 5' UCUAUAUAGUUCCUUGCCUUA 3' ENST00000259349 E:-22.32 S:106.000000 Loc:735 Cons: 100.00%(mmu) 100.00%(rno)	3' AGUAUCGGGACAUGUUACGACGA 5' hsa-mir-103 __ ..||||.|||..|::|||.|||| __ 5' AAAUAG-CCUAAAUGAUGGUGCU 3' ENST00000259349 E:-18.129999 S:103.000000 Loc:468 Cons: %(mmu) 90.91%(rno)	3' GUGUUUAA-GCCUAGAUGUCCCAU 5' hsa-mir-10a __ ::.||:||.:||||.|.||||||| __ 5' UGGAAGUUGUGGAUAU-CAGGGUA 3' ENST00000259349 E:-22.190001 S:100.000000 Loc:279 Cons: 95.65%(mmu) 95.65%(rno)
ENST00000305842_P	ENSG00000169783		1		ENSMUSG00000049556	ENSRNOG00000017193	ENSG00000169783 (-1) (75622205 75622205 75624049 75624049 75468150) 4001 (4001 nt) [IPR007110:Immunoglobulin-like; IPR001611:Leucine-rich repeat; IPR000372:Cysteine-rich flanking region, N-terminal; IPR000483:Cysteine-rich flanking region, C-terminal;]	5	-102.48	543	ENSMUSG00000049556 (mmu-miR-136)	ENSRNOG00000017193 (mmu-miR-136)	hsa-mir-136 hsa-mir-145 rno-mir-148b hsa-mir-185 rno-mir-346	hsa-mir-145 hsa-mir-145 hsa-mir-136 rno-mir-148b hsa-mir-185		3' UUCCCUAAGGA-CCCUUUUGACCUG 5' hsa-mir-145 __ :||||||..||..|||||||.|||. __ 5' GAGGGAUCACUCAGGAAAACAGGAA 3' ENST00000305842_P E:-24.809999 S:114.000000 Loc:507 Cons: 92.00%(mmu) 92.00%(rno)	3' UUCCCUAAGGACCCUUUUGACCUG 5' hsa-mir-145 __ .|.|||||::|..|||||||.||. __ 5' UAUGGAUUUUUAUGAAAACUUGAA 3' ENST00000305842_P E:-18.4 S:114.000000 Loc:330 Cons: 95.83%(mmu) 95.83%(rno)	3' AGGUAGUAGUUUUGUUUACCUCA 5' hsa-mir-136 __ ||||.||||.:.||||||||:.. __ 5' UCCA-CAUCUGUACAAAUGGGAA 3' ENST00000305842_P E:-21.59 S:112.000000 Loc:896 Cons: 100.00%(mmu) 100.00%(rno)	3' UGUUUC-AAGACACUACGUGACU 5' rno-mir-148b __ |||::|.|.:|||||.|.|:||| __ 5' ACAGGGCUGUUGUGAGGAAUUGA 3' ENST00000305842_P E:-19.309999 S:102.000000 Loc:943 Cons: 91.30%(mmu) 91.30%(rno)	3' CUUGACGGAAAGAGAGGU 5' hsa-mir-185 __ ...||.|||||||||:|. __ 5' UUCCU-CCUUUCUCUUCU 3' ENST00000305842_P E:-18.370001 S:101.000000 Loc:480 Cons: %(mmu) 100.00%(rno)
ENST00000320683_P	ENSG00000165458	INPPL1	1		ENSMUSG00000032737	ENSRNOG00000019730	INOSITOL POLYPHOSPHATE PHOSPHATASE-LIKE 1. [Source:RefSeq;Acc:NM_001567] ENSG00000165458 (1) (71675000 71675000 71675705 71675705 71717504) 4001 (4001 nt) HUGO:6080: [IPR001660:Sterile alpha motif SAM; IPR000980:SH2 motif; IPR005135:Endonuclease/exonuclease/phosphatase family;]	5	-119.72	525		ENSRNOG00000019730 (mmu-miR-125a)	hsa-mir-125a hsa-mir-145 rno-mir-151 hsa-mir-205 hsa-mir-24	hsa-mir-125a hsa-mir-24 hsa-mir-145 rno-mir-151 hsa-mir-125a	0006281 DNA repair IEA; 0004437 inositol/phosphatidylinositol phosphatase activity IEA; 0006796 phosphate metabolism TAS; 0007242 intracellular signaling cascade IEA; 0000004 biological_process unknown ND; 0008372 cellular_component unknown ND;	3' GUGUCCAAUUUCCCAGAGUCCCU 5' hsa-mir-125a __ ..|:||.||:.|||||||||.|| __ 5' GUCGGGGUAGUGGGUCUCAGCGA 3' ENST00000320683_P E:-28.360001 S:122.000000 Loc:2807 Cons: %(mmu) 91.30%(rno)	3' GACAAGGACGACUUGACUCGGU 5' hsa-mir-24 __ |||||..|||.|||||.:|||. __ 5' CUGUU--UGCGGAACUUGGCCC 3' ENST00000320683_P E:-18.98 S:105.000000 Loc:1806 Cons: %(mmu) 95.00%(rno)	3' UUCCCUAAGGACCCUUUUGACCUG 5' hsa-mir-145 __ ..|||.||||.|.||||:..|||| __ 5' CCGGGCUUCCGGUGAAAGGAGGAC 3' ENST00000320683_P E:-25.209999 S:103.000000 Loc:1425 Cons: %(mmu) 100.00%(rno)	3' GGA-GUUC-CUCGGAGUCAGAUCA 5' rno-mir-151 __ |||.||.|.||||||||||..:|| __ 5' CCUGCACGCGAGCCUCAGUGAGGU 3' ENST00000320683_P E:-25.77 S:103.000000 Loc:2747 Cons: %(mmu) 91.67%(rno)	3' GUGUCCAAUUUCCCAGAGUCCCU 5' hsa-mir-125a __ ::||||..::|.||.|||.|||| __ 5' UGCAGGCCGGAUGG-CUCUGGGA 3' ENST00000320683_P E:-21.4 S:92.000000 Loc:2899 Cons: %(mmu) 90.91%(rno)
ENST00000332845	ENSG00000183283	DAZAP2	1		ENSMUSG00000000346	ENSRNOG00000004628	DAZ ASSOCIATED PROTEIN 2; DELETED IN AZOOSPERMIA ASSOCIATED PROTEIN 2. [Source:RefSeq;Acc:NM_014764] ENSG00000183283 (1) (49918893 49918959 49922509 49923833 50071400) 1324 (1324 nt) HUGO:2684:KIAA0058 [IPR000515:Binding-protein-dependent transport systems inner membrane component; IPR000694:Proline-rich region;]	5	-100.65	519	ENSMUSG00000000346 (mmu-miR-10a)	ENSRNOG00000004628 (mmu-miR-10a)	hsa-mir-10a hsa-mir-106b hsa-mir-125b rno-mir-140* hsa-mir-18 hsa-mir-181b hsa-mir-26b mmu-mir-292_3p rno-mir-322 rno-mir-338	rno-mir-140* rno-mir-338 hsa-mir-181b hsa-mir-10a hsa-mir-26b	0005215 transporter activity IEA; 0006810 transport IEA; 0016020 membrane IEA;	3' ACAGGCACCAAGAUGGGACACCAU 5' rno-mir-140* __ ||||:.|...|||||.|||||||: __ 5' UGUCUCU--CUCUACACUGUGGUG 3' ENST00000332845 E:-23.57 S:114.000000 Loc:1220 Cons: 90.91%(mmu) 90.91%(rno)	3' AGUUGUUUUAGUGACUACGACCU 5' rno-mir-338 __ ||.|:.:|||||.||:|||.||| __ 5' UCCAUUGAAUCAAUGGUGCAGGA 3' ENST00000332845 E:-18.48 S:110.000000 Loc:523 Cons: 91.30%(mmu) %(rno)	3' UUGGGUGGCUGUCGUUACUUACAA 5' hsa-mir-181b __ :..|||::|||.|:.|||:|.||| __ 5' GUACCAUUGACUGUUAUGGAAGUU 3' ENST00000332845 E:-21.23 S:102.000000 Loc:1189 Cons: 95.83%(mmu) 95.83%(rno)	3' GU-GUUUAAGCCUAGAUGUCCCAU 5' hsa-mir-10a __ ||.||||||.||.|:|:.||||.| __ 5' CAUCAAAUUAGG-UUUGGAGGGAA 3' ENST00000332845 E:-19.68 S:97.000000 Loc:319 Cons: 95.65%(mmu) 95.65%(rno)	3' UGGAUAGGACUUAAUGAACUU 5' hsa-mir-26b __ :.||||::||||..|:||||| __ 5' GACUAUUUUGAA-GAUUUGAA 3' ENST00000332845 E:-17.690001 S:96.000000 Loc:1286 Cons: 100.00%(mmu) 100.00%(rno)
ENST00000271663	ENSG00000143398	PIP5K1A	1		ENSMUSG00000028126	ENSRNOG00000021068	PHOSPHATIDYLINOSITOL-4-PHOSPHATE 5-KINASE, TYPE I, ALPHA. [Source:RefSeq;Acc:NM_003557] ENSG00000143398 (1) (148387609 148388055 148436923 148438588 148443780) 1665 (1665 nt) HUGO:8994: [IPR002498:Phosphatidylinositol-4-phosphate 5-kinase;]	5	-121.08	509	ENSMUSG00000028126 (mmu-miR-125a)	ENSRNOG00000021068 (mmu-miR-150)	hsa-mir-125a hsa-mir-150 hsa-mir-198 hsa-mir-214 rno-mir-327 rno-mir-342 rno-mir-352	hsa-mir-125a hsa-mir-214 rno-mir-352 hsa-mir-150 rno-mir-327	0004431 1-phosphatidylinositol-4-phosphate kinase IEA; 0016301 kinase activity IEA; 0016308 1-phosphatidylinositol-4-phosphate 5-kinase activity IEA; 0016740 transferase activity IEA; 0006650 glycerophospholipid metabolism TAS; 0007165 signal transduction TAS; 0016308 1-phosphatidylinositol-4-phosphate 5-kinase activity NAS; 0016310 phosphorylation NAS; 0008372 cellular_component unknown ND;	3' GUGUCCAAUUUCCCAGAGUCCCU 5' hsa-mir-125a __ .:.|||..:..||||||:||||| __ 5' GGGAGG--GCUGGGUCUUAGGGA 3' ENST00000271663 E:-29.52 S:110.000000 Loc:1518 Cons: 95.24%(mmu) %(rno)	3' GACGGACAGACACGGACGACA 5' hsa-mir-214 __ |||.|||.||||.::|||||. __ 5' CUGGCUGCCUGUCUUUGCUGC 3' ENST00000271663 E:-27.639999 S:106.000000 Loc:1374 Cons: 100.00%(mmu) 95.24%(rno)	3' AUGAUACGUUGGAUGAUGAGA 5' rno-mir-352 __ ||||||.:.:|||.|||||:| __ 5' UACUAU-UUGCCU-CUACUUU 3' ENST00000271663 E:-17.4 S:101.000000 Loc:1569 Cons: 100.00%(mmu) %(rno)	3' GUGACCAUGUUCCCAACCCUCU 5' hsa-mir-150 __ .|.|..|::.||||.||||||: __ 5' GAGUUCUGUUAGGGGUGGGAGG 3' ENST00000271663 E:-25.74 S:100.000000 Loc:1484 Cons: %(mmu) 95.45%(rno)	3' UGGGAGUACGGGGAGUUCC 5' rno-mir-327 __ ||:||:|..::|||||:|. __ 5' ACUCUUAAUUUCCUCAGGA 3' ENST00000271663 E:-20.780001 S:92.000000 Loc:381 Cons: %(mmu) 94.74%(rno)
ENST00000298130_P	ENSG00000165389	C14orf147	1		ENSMUSG00000044408	ENSRNOG00000004292	ENSG00000165389 (-1) (32894446 32894446 32921443 32921443 32410326) 4001 (4001 nt) HUGO:20361: []	5	-100.69	506	ENSMUSG00000044408 (mmu-miR-130b)	ENSRNOG00000004292 (mmu-miR-130b)	hsa-mir-130b hsa-mir-146 hsa-mir-198 hsa-mir-210 rno-mir-330	hsa-mir-130b hsa-mir-146 rno-mir-330 hsa-mir-198 hsa-mir-210		3' UACGGGAAAGU-AGUAACGUGAC 5' hsa-mir-130b __ |..:|||||||.||.|||:|:|| __ 5' AAAUCCUUUCACUCUUUGUAUUG 3' ENST00000298130_P E:-22.299999 S:111.000000 Loc:933 Cons: 91.30%(mmu) 91.30%(rno)	3' UUGGGUACCUUAAGUCAAGAGU 5' hsa-mir-146 __ |||:||.|||:|.|||||:|.: __ 5' AACUCA-GGAGUACAGUUUUAG 3' ENST00000298130_P E:-20.790001 S:104.000000 Loc:532 Cons: 95.24%(mmu) %(rno)	3' AGAGACGUCCG-GGACACGAAACG 5' rno-mir-330 __ .|.:||:||.|.::|||.|||||. __ 5' ACAUUGUAGUCAUUUGUACUUUGA 3' ENST00000298130_P E:-18.299999 S:100.000000 Loc:226 Cons: 95.83%(mmu) 95.83%(rno)	3' GGAUAGAGGGGAGACCUGG 5' hsa-mir-198 __ :.|||:||:.||||.|||| __ 5' UAUAUUUCUACUCUUGACC 3' ENST00000298130_P E:-19.129999 S:99.000000 Loc:416 Cons: 100.00%(mmu) %(rno)	3' GUCGGCGACAGUGUGCGUGUC 5' hsa-mir-210 __ ::|.:||||.||:.:|||||. __ 5' UGGGUGCUG-CAUUUGCACAU 3' ENST00000298130_P E:-20.17 S:92.000000 Loc:843 Cons: %(mmu) 90.00%(rno)
ENST00000229241	ENSG00000111642	CHD4	1		ENSMUSG00000018475	ENSRNOG00000018309	CHROMODOMAIN HELICASE-DNA-BINDING PROTEIN 4 (CHD-4) (MI-2 AUTOANTIGEN 218 KDA PROTEIN) (MI2-BETA). [Source:SWISSPROT;Acc:Q14839] ENSG00000111642 (-1) (6549510 6550103 6585800 6586795 6547681) 593 (593 HUGO:1919:Mi-2b [IPR000005:Helix-turn-helix, AraC type; IPR000953:Chromo domain; IPR002464:ATP-dependent helicase, DEAH-box; IPR000330:SNF2 related domain; IPR001650:Helicase, C-terminal; IPR001965:…	5	-115.21	504	ENSMUSG00000018475 (rno-miR-140*)		rno-mir-140* hsa-mir-17_5p hsa-mir-184 mmu-mir-293 mmu-mir-298 hsa-mir-34a rno-mir-346 hsa-mir-sf164_seth hsa-mir-sf202_seth	hsa-mir-sf164_seth hsa-mir-sf202_seth rno-mir-140* hsa-mir-184 rno-mir-346	0003682 chromatin binding IEA; 0004003 ATP dependent DNA helicase activity TAS; 0005524 ATP binding IEA; 0008270 zinc ion binding TAS; 0006333 chromatin assembly/disassembly IEA; 0006357 regulation of transcription from Pol II promoter TAS; 0007001 chromosome organization and biogenesis (sensu Eukarya) TAS; 0016568 chromatin modification IEA; 0000785 chromatin IEA; 0005634 nucleus IEA; 0003700 tr…	3' GAUGUAUCUUACCGUAGAGAGU 5' hsa-mir-sf164_seth __ ||||.|..:.||||||||:|:. __ 5' CUACCUCUGUUGGCAUCUUUUU 3' ENST00000229241 E:-18.67 S:108.000000 Loc:429 Cons: 100.00%(mmu) %(rno)	3' GCGGGAGAGUUGGG-UCGAAAA 5' hsa-mir-sf202_seth __ .|||:|||.:||||.:||||.| __ 5' GGCCUUCUGGACCCUGGCUUCU 3' ENST00000229241 E:-27.200001 S:103.000000 Loc:237 Cons: 90.91%(mmu) %(rno)	3' ACAGGCACCAAGAUGGGAC-ACCAU 5' rno-mir-140* __ |..::.|||||:||:::||.||||. __ 5' UCCUUUUGGUUUUAUUUUGUUGGUU 3' ENST00000229241 E:-23.379999 S:99.000000 Loc:338 Cons: 92.00%(mmu) %(rno)	3' UGGGAAUAGU-CAAGAG-GCAGGU 5' hsa-mir-184 __ |||:|..|||..|||||.:||||. __ 5' ACCUUCCUCACUUUCUCUUGUCCC 3' ENST00000229241 E:-19.809999 S:98.000000 Loc:37 Cons: 91.67%(mmu) %(rno)	3' UCUCCGUCCGUGAGUCCG-UCUGU 5' rno-mir-346 __ .|:|.::|||.|.::|||.||||| __ 5' UGGGCUGGGCCCCUGGGCGAGACA 3' ENST00000229241 E:-26.15 S:96.000000 Loc:403 Cons: 91.67%(mmu) %(rno)
ENST00000257701	ENSG00000135250	SRPK2	1		ENSMUSG00000004870	ENSRNOG00000010601	SFRS PROTEIN KINASE 2 ISOFORM B. [Source:RefSeq;Acc:NM_182691] ENSG00000135250 (-1) (104317355 104318816 104469902 104470008 103408884) 1461 (1461 nt) HUGO:11306:SFRSK2 [IPR000719:Protein kinase; IPR002290:Serine/Threonine protein kinase; IPR000694:Proline-rich region; IPR002965:Proline-rich extensin; IPR001472:Bipartite nuclear localization signal;]	5	-98.89	498	ENSMUSG00000004870 (mmu-miR-126)	ENSRNOG00000010601 (mmu-miR-126)	hsa-mir-126 hsa-mir-129 rno-mir-140* hsa-mir-142_3p rno-mir-151 hsa-mir-191 hsa-mir-301 rno-mir-330	hsa-mir-129 hsa-mir-301 hsa-mir-126 rno-mir-151 hsa-mir-142_3p	0004674 protein serine/threonine kinase activity IEA; 0004713 protein-tyrosine kinase activity IEA; 0005524 ATP binding IEA; 0006468 protein amino acid phosphorylation IEA; 0016740 transferase activity IEA; 0000245 spliceosome assembly TAS; 0008380 RNA splicing TAS; 0005634 nucleus TAS;	3' CGUU-CGGGUCUGGCGUUUUUC 5' hsa-mir-129 __ ||||...|:|||::|::||||| __ 5' GCAAUAACUAGAUUGUGAAAAG 3' ENST00000257701 E:-20.110001 S:109.000000 Loc:1355 Cons: 90.91%(mmu) 90.91%(rno)	3' CGAAACUGUUAUGAUAACGUGAC 5' hsa-mir-301 __ |||||||.::||||:|||:.:|| __ 5' GCUUUGA-GGUACUGUUGU-UUG 3' ENST00000257701 E:-22.530001 S:107.000000 Loc:122 Cons: 100.00%(mmu) 100.00%(rno)	3' CGUAAUAAUGAGUGC--CAUGCU 5' hsa-mir-126 __ |||||:||.||:::|..||::|| __ 5' GCAUUGUUUCUUGUGUUGUGUGA 3' ENST00000257701 E:-18.120001 S:99.000000 Loc:248 Cons: 91.30%(mmu) 91.30%(rno)	3' GGAGUUCCUCGGAGUCAGAUCA 5' rno-mir-151 __ |.|:||||.|||||:.|:|.|. __ 5' CAUUAAGGUGCCUCGUUUUUGA 3' ENST00000257701 E:-20.209999 S:92.000000 Loc:1301 Cons: 90.91%(mmu) %(rno)	3' AGGUAUUUCAUCCUUUGUGAUGU 5' hsa-mir-142_3p __ .||||..||||||.||:||.|:. __ 5' ACCAU--AGUAGGCAAUACAAUU 3' ENST00000257701 E:-17.92 S:91.000000 Loc:1199 Cons: 90.48%(mmu) %(rno)
ENST00000304275	ENSG00000171843	MLLT3	1		ENSMUSG00000028496	ENSRNOG00000011280	AF-9 PROTEIN. [Source:SWISSPROT;Acc:P42568] ENSG00000171843 (-1) (20334968 20336441 20404246 20612450 19885975) 1473 (1473 nt) HUGO:7136:AF-9 AF9 [IPR001472:Bipartite nuclear localization signal;]	5	-95.65	484	ENSMUSG00000028496 (mmu-let-7a)	ENSRNOG00000011280 (mmu-let-7a)	hsa-let-7a hsa-mir-107 hsa-mir-134 hsa-mir-147 hsa-mir-206 hsa-mir-222 hsa-mir-26b hsa-mir-98	hsa-mir-147 hsa-mir-134 hsa-mir-26b hsa-mir-222 hsa-mir-107	0006355 regulation of transcription, DNA-dependent IEA; 0008151 cell growth and/or maintenance IEA; 0005634 nucleus TAS;	3' CGUCUU-CGUA-AAGGUGUGUG 5' hsa-mir-147 __ |..|||.||||.|||.|||||| __ 5' GACGAAUGCAUAUUCAACACAC 3' ENST00000304275 E:-18.09 S:100.000000 Loc:363 Cons: 90.91%(mmu) %(rno)	3' GGGAGACCAGUUGGUCAGU-GU 5' hsa-mir-134 __ :::|||....|:|||||||.|| __ 5' UUUUCUUUAAAGCCAGUCAUCA 3' ENST00000304275 E:-20.65 S:97.000000 Loc:158 Cons: 95.45%(mmu) 95.45%(rno)	3' UGGAUAGGACUUAAU-GAACUU 5' hsa-mir-26b __ |.:||.||||:||.:.|||||| __ 5' AGUUAGCCUGGAUAGCCUUGAA 3' ENST00000304275 E:-17.24 S:97.000000 Loc:255 Cons: 90.91%(mmu) %(rno)	3' CUCUGGGUCAUCGGUCUACAUCGA 5' hsa-mir-222 __ |:|:||||||..:::|.||||.|. __ 5' GGGGCCCAGUCCUUGGCUGUAUCC 3' ENST00000304275 E:-21.540001 S:96.000000 Loc:693 Cons: 91.67%(mmu) %(rno)	3' ACUAUCGGGACAUGUUACGACGA 5' hsa-mir-107 __ .|||.||:||.|.||||||.||. __ 5' GGAU-GCUCU-UUCAAUGCAGCA 3' ENST00000304275 E:-18.129999 S:94.000000 Loc:480 Cons: 95.24%(mmu) 95.24%(rno)
ENST00000262519	ENSG00000099381		1		ENSMUSG00000042308	ENSRNOG00000019045	ENSG00000099381 (1) (31004675 31006113 31031404 31032041 31032589) 637 (637 nt) [IPR001687:ATP/GTP-binding site motif A (P-loop); IPR002965:Proline-rich extensin; IPR000504:RNA-binding region RNP-1 (RNA recognition motif); IPR001214:Nuclear protein SET;]	4	-110.95	445	ENSMUSG00000042308 (mmu-miR-145)	ENSRNOG00000019045 (mmu-miR-125b)	hsa-mir-125b hsa-mir-125a hsa-mir-145 hsa-mir-181b hsa-mir-217 mmu-mir-298 rno-mir-324_3p rno-mir-331 rno-mir-351	rno-mir-324_3p rno-mir-351 hsa-mir-145 mmu-mir-298	0003676 nucleic acid binding IEA;	3' GGUCGUCGUGGACCCCGUCACC 5' rno-mir-324_3p __ ::||.:|:.:|||||||||||| __ 5' UUAGGGGUCUCUGGGGCAGUGG 3' ENST00000262519 E:-36.630001 S:134.000000 Loc:378 Cons: %(mmu) 100.00%(rno)	3' GUCCGAGUUUCCCGAGGAGUCCCU 5' rno-mir-351 __ |||.||:|:.||||||..|||||. __ 5' CAGCCUUAGUGGGCUCAGCAGGGC 3' ENST00000262519 E:-33.830002 S:111.000000 Loc:68 Cons: %(mmu) 95.83%(rno)	3' UUCCCUAAGGAC-CCUUUUGACCUG 5' hsa-mir-145 __ |:..|.||||||.|||||.||||:. __ 5' AGCUGUUUCCUGUGGAAACCUGGGG 3' ENST00000262519 E:-23.379999 S:108.000000 Loc:254 Cons: 96.00%(mmu) 96.00%(rno)	3' CCUUCUUGUCG-GGAGGAGACGG 5' mmu-mir-298 __ ...:||||..:.||||.||||:: __ 5' CCUGGAACCCUGCCUCAUCUGUU 3' ENST00000262519 E:-17.110001 S:92.000000 Loc:455 Cons: %(mmu) 95.65%(rno)
ENST00000260970_P	ENSG00000138398	PPIG	1		ENSMUSG00000042133	ENSRNOG00000007673	PEPTIDYL-PROLYL ISOMERASE G (CYCLOPHILIN G); CLK-ASSOCIATING RS-CYCLOPHILIN. [Source:RefSeq;Acc:NM_004792] ENSG00000138398 (1) (170663096 170663096 170696577 170696577 170753652) 4001 (4001 nt) HUGO:14650:CARS-Cyp SRCyp [IPR001472:Bipartite nuclear localization signal; IPR001687:ATP/GTP-binding site motif A (P-loop); IPR002130:Peptidyl-prolyl cis-trans isomerase, cyclophilin type;]	4	-74.81	437	ENSMUSG00000042133 (mmu-miR-194)	ENSRNOG00000007673 (rno-miR-101b)	rno-mir-101b rno-mir-151 hsa-mir-194 rno-mir-352	hsa-mir-194 rno-mir-352 rno-mir-101b rno-mir-151	0004600 cyclophilin TAS; 0008248 pre-mRNA splicing factor activity TAS; 0016853 isomerase activity IEA; 0030051 FK506-sensitive peptidyl-prolyl cis-trans isomerase IEA; 0042027 cyclophilin-type peptidyl-prolyl cis-trans isomerase activity IEA; 0006371 mRNA splicing TAS; 0006457 protein folding IEA; 0005654 nucleoplasm TAS;	3' AGGUGUACCUCAACGACAAUGU 5' hsa-mir-194 __ |:.|..|.||||||||||||:| __ 5' UUGAGCUUGAGUUGCUGUUAUA 3' ENST00000260970_P E:-21.48 S:124.000000 Loc:678 Cons: 100.00%(mmu) 100.00%(rno)	3' AUGAUACGUUGGAUGAUGAGA 5' rno-mir-352 __ |:.|:||:::|||.:||:||| __ 5' UGAUGUGUGGCCUUUUAUUCU 3' ENST00000260970_P E:-18.59 S:109.000000 Loc:1272 Cons: 100.00%(mmu) %(rno)	3' GAAGUCGAUAGUGUCAUGACAU 5' rno-mir-101b __ |||::|....:::||||||||: __ 5' CUUUGG----UGUAGUACUGUG 3' ENST00000260970_P E:-17.280001 S:104.000000 Loc:221 Cons: %(mmu) 100.00%(rno)	3' GGAGUUCCUCGGAGUCAGAUCA 5' rno-mir-151 __ |:||....|.|.|:|||||||| __ 5' CUUCUCUUAUCAUUAGUCUAGU 3' ENST00000260970_P E:-17.459999 S:100.000000 Loc:3756 Cons: %(mmu) 100.00%(rno)
ENST00000332102_P	ENSG00000173406	DAB1	1	3677-3693	ENSMUSG00000028519	ENSRNOG00000007410	DISABLED HOMOLOG 1. [Source:SWISSPROT;Acc:O75553] ENSG00000173406 (-1) (56846286 56846286 57126620 57126620 56801568) 4001 (4001 nt) HUGO:2661: [IPR006020:Phosphotyrosine interaction domain; IPR001472:Bipartite nuclear localization signal;]	4	-80.49	435	ENSMUSG00000028519 (mmu-miR-15a)	ENSRNOG00000007410 (mmu-miR-106b)	hsa-mir-106b hsa-mir-15a hsa-mir-194 hsa-mir-21 rno-mir-330 hsa-mir-34a	hsa-mir-21 hsa-mir-15a rno-mir-330 hsa-mir-106b	0007275 development IEA; 0007399 neurogenesis IEA;	3' AGUUGUAGUCAGACUAUUCGAU 5' hsa-mir-21 __ .::|||||.|.:|||||||||| __ 5' AUGACAUCUG-UUGAUAAGCUA 3' ENST00000332102_P E:-22.68 S:127.000000 Loc:3029 Cons: 95.24%(mmu) 90.48%(rno)	3' GUGUUUGGU-AAUACACGACGAU 5' hsa-mir-15a __ :|:|..:||.|.|||||:||||: __ 5' UAUACUUCACUGAUGUGUUGCUG 3' ENST00000332102_P E:-20.33 S:112.000000 Loc:3292 Cons: 91.30%(mmu) 91.30%(rno)	3' AGAGACGUCCG-GGACACGAAACG 5' rno-mir-330 __ |||..|:|||:.:||||.||||.: __ 5' UCUGGGUAGGUAUCUGUCCUUUUU 3' ENST00000332102_P E:-20.08 S:101.000000 Loc:12 Cons: 95.83%(mmu) 95.83%(rno)	3' UAGACGUGACAGUCGUGAAAU 5' hsa-mir-106b __ |.||||.||.||||.|||||. __ 5' AACUGC-CUAUCAG-ACUUUC 3' ENST00000332102_P E:-17.4 S:95.000000 Loc:3400 Cons: %(mmu) 100.00%(rno)
ENST00000310046	ENSG00000173914		1		ENSMUSG00000033760	ENSRNOG00000019650	ENSG00000173914 (-1) (66207832 66211455 66219910 66220694 66135847) 587 (587 nt) [IPR000504:RNA-binding region RNP-1 (RNA recognition motif); IPR001878:Zn-finger, CCHC type;]	4	-83.6	435	ENSMUSG00000033760 (mmu-miR-185)		hsa-mir-185 hsa-mir-30c hsa-mir-30b rno-mir-322 rno-mir-340 rno-mir-352	rno-mir-322 rno-mir-352 hsa-mir-185 hsa-mir-30c	0003676 nucleic acid binding IEA;	3' AC-AACGUCGCGAAGUACAAA 5' rno-mir-322 __ ||.||.||.:||||||||||| __ 5' UGUUUCCAUUGCUUCAUGUUU 3' ENST00000310046 E:-19.58 S:128.000000 Loc:86 Cons: 95.24%(mmu) %(rno)	3' AUGAUACGUUGGAUGAUGAGA 5' rno-mir-352 __ |:..|.|||:|||.:|||||| __ 5' UGGCAAGCAGCCUUUUACUCU 3' ENST00000310046 E:-21.5 S:108.000000 Loc:371 Cons: 90.48%(mmu) %(rno)	3' CUUGAC-GGAAAGAGAGGU 5' hsa-mir-185 __ .|::||.|:|||||:|||. __ 5' AAGUUGACUUUUCUUUCCU 3' ENST00000310046 E:-18.18 S:104.000000 Loc:160 Cons: 94.74%(mmu) %(rno)	3' CGACUCUCACAUCCUACAAAUGU 5' hsa-mir-30c __ .|||.|||.|||||||..||:|: __ 5' ACUG-GAG-GUAGGAUAAUUGCG 3' ENST00000310046 E:-24.34 S:95.000000 Loc:3 Cons: 100.00%(mmu) %(rno)
ENST00000263754	ENSG00000114166	PCAF	1		ENSMUSG00000000708	ENSRNOG00000011871	P300/CBP-ASSOCIATED FACTOR (EC 2.3.1.-) (P/CAF) (HISTONE ACETYLASE PCAF). [Source:SWISSPROT;Acc:Q92831] ENSG00000114166 (1) (20056998 20056998 20168982 20170859 21422486) 1877 (1877 nt) HUGO:8638:P/CAF [IPR001487:Bromodomain; IPR000182:GCN5-related N-acetyltransferase;]	4	-75.58	432	ENSMUSG00000000708 (mmu-miR-34a)	ENSRNOG00000011871 (mmu-miR-17_5p)	hsa-mir-17_5p hsa-mir-34a hsa-mir-363	hsa-mir-363 hsa-mir-17_5p hsa-mir-34a hsa-mir-34a	0003712 transcription cofactor activity IPI; 0004407 histone deacetylase activity TAS; 0008080 N-acetyltransferase activity IEA; 0016740 transferase activity IEA; 0006338 chromatin modeling NAS; 0006355 regulation of transcription, DNA-dependent IEA; 0006473 protein amino acid acetylation TAS; 0007049 cell cycle IEA; 0007050 cell cycle arrest TAS; 0008285 negative regulation of cell proliferation…	3' AAUGUCUACCUAUGGCACGUUA 5' hsa-mir-363 __ ||.|..||.||||::||||||| __ 5' UUUCUUAUAGAUAUUGUGCAAU 3' ENST00000263754 E:-17.809999 S:121.000000 Loc:1732 Cons: %(mmu) 100.00%(rno)	3' UGAUGGACGUGACAUUCGUGAAAC 5' hsa-mir-17_5p __ .||.:||.:|:||.|||||:|||. __ 5' UCU-UCUAUAUUGAAAGCAUUUUU 3' ENST00000263754 E:-17.24 S:108.000000 Loc:1684 Cons: %(mmu) 100.00%(rno)	3' UGUUGGUCGAUUCUGU-GACGGU 5' hsa-mir-34a __ |:|:..|..|:|||||.|||||| __ 5' AUAGAAAAGUGAGACAUCUGCCA 3' ENST00000263754 E:-22.75 S:108.000000 Loc:1147 Cons: 91.30%(mmu) %(rno)	3' UGUUGGUCGAUUCUGUGACGGU 5' hsa-mir-34a __ |.|||||.||||.|:||..||| __ 5' AAAACCAACUAAUAUACAACCA 3' ENST00000263754 E:-17.780001 S:95.000000 Loc:1184 Cons: 100.00%(mmu) 100.00%(rno)
ENST00000263455	ENSG00000066468	FGFR2	1		ENSMUSG00000030849	ENSRNOG00000016374	FIBROBLAST GROWTH FACTOR RECEPTOR 2 PRECURSOR (EC 2.7.1.112) (FGFR-2) (KERATINOCYTE GROWTH FACTOR RECEPTOR 2). [Source:SWISSPROT;Acc:P21802] ENSG00000066468 (-1) (122902443 122903958 123017918 1230225 HUGO:3689:BEK CEK3 CFD1 ECT1 JWS K-SAM KGFR TK14 TK25 [IPR000719:Protein kinase; IPR001245:Tyrosine protein kinase; IPR007110:Immunoglobulin-like;]	4	-76.45	429	ENSMUSG00000030849 (mmu-let-7f)	ENSRNOG00000016374 (mmu-let-7f)	hsa-let-7f hsa-let-7b hsa-let-7c hsa-let-7a rno-mir-337 rno-mir-338 rno-mir-352 hsa-mir-362 hsa-mir-sf164_seth	rno-mir-337 129 hsa-mir-sf164_seth hsa-mir-362	0004713 protein-tyrosine kinase activity NAS; 0004872 receptor activity IEA; 0005007 fibroblast growth factor receptor activity NAS; 0005524 ATP binding IEA; 0016740 transferase activity IEA; 0006468 protein amino acid phosphorylation NAS; 0016021 integral to membrane NAS; 0004674 protein serine/threonine kinase activity IEA; 0004713 protein-tyrosine kinase activity IEA; 0006468 protein amino aci…	3' UUUCCGUAGUAUAUCCUCGACUU 5' rno-mir-337 __ |||.|||.:|||||||.||||:| __ 5' AAAUGCAGUAUAUAGGUGCUGGA 3' ENST00000263455 E:-23.309999 S:129.000000 Loc:362 Cons: 95.65%(mmu) 100.00%(rno)	3' UUGAUAUGUUAGAUGAUGGAGU 5' hsa-let-7f __ :||||..:||||||:|:|:|.: __ 5' GACUAGUUAAUCUAUUGCUUGG 3' ENST00000263455 E:-18.700001 S:105.000000 Loc:698 Cons: 100.00%(mmu) 100.00%(rno)	3' GAUGUAUCUUACCGUAGAGAGU 5' hsa-mir-sf164_seth __ :.|:.||.|:||||||:|||.. __ 5' UAAUUUA-AGUGGCAUUUCUAU 3' ENST00000263455 E:-17.209999 S:102.000000 Loc:664 Cons: 100.00%(mmu) 100.00%(rno)	3' GAGUGUG-GAUCCAAGGUUCCUAA 5' hsa-mir-362 __ ...|:||.:|.|.||:||:|||.. __ 5' AAAAUACUUUUGCUUUCAGGGAAA 3' ENST00000263455 E:-17.23 S:93.000000 Loc:572 Cons: 95.83%(mmu) %(rno)
ENST00000253363	ENSG00000131051	RNPC2	1		ENSMUSG00000027620	ENSRNOG00000019848	RNA-BINDING REGION CONTAINING PROTEIN 2 (HEPATOCELLULAR CARCINOMA PROTEIN 1) (SPLICING FACTOR HCC1). [Source:SWISSPROT;Acc:Q14498] ENSG00000131051 (-1) (35006962 35007832 35044225 35045572 35002704) 8 HUGO:15923:CAPER CC1.3 HCC1 [IPR000504:RNA-binding region RNP-1 (RNA recognition motif); IPR001472:Bipartite nuclear localization signal;]	4	-76.4	423	ENSMUSG00000027620 (mmu-miR-148b)	ENSRNOG00000019848 (mmu-miR-124a)	hsa-mir-124a rno-mir-148b hsa-mir-19b mmu-mir-202 hsa-mir-28 mmu-mir-293 rno-mir-330 hsa-mir-98	hsa-mir-124a hsa-mir-98 hsa-mir-19b hsa-mir-28	0003723 RNA binding IEA; 0006355 regulation of transcription, DNA-dependent IEA; 0006371 mRNA splicing IEA; 0005634 nucleus IEA;	3' ACCGUAAGUGGCGCACGGAAUU 5' hsa-mir-124a __ ..|::|||.:.|:|||:||||| __ 5' AUGUGUUC-UGGUGUGUCUUAA 3' ENST00000253363 E:-18.549999 S:113.000000 Loc:575 Cons: %(mmu) 90.48%(rno)	3' UUGUUAUGUUGAAUGAUGGAGU 5' hsa-mir-98 __ :||||.|||:|||:.||::||. __ 5' GACAAGACAGCUUGAUAUUUCU 3' ENST00000253363 E:-18.290001 S:107.000000 Loc:777 Cons: 100.00%(mmu) 100.00%(rno)	3' AGUCAAAACGUACCUAAACGUGU 5' hsa-mir-19b __ |.:||||||:.|||..|||||:| __ 5' UAGGUUUUGUCUGG--UUGCAUA 3' ENST00000253363 E:-18.74 S:102.000000 Loc:691 Cons: 95.24%(mmu) 100.00%(rno)	3' GAGUUAUCUGACACUCGAGGAA 5' hsa-mir-28 __ :|:||.:..||||||||||:.. __ 5' UUUAA-GCUCUGUGAGCUCUGA 3' ENST00000253363 E:-20.82 S:101.000000 Loc:726 Cons: 100.00%(mmu) 100.00%(rno)
ENST00000295172	ENSG00000163041	H3F3B	1		ENSMUSG00000043033	ENSRNOG00000003220	HISTONE H3.3 (H3.A) (H3.B) (H3.3Q). [Source:SWISSPROT;Acc:P06351] ENSG00000163041 (1) (223225052 223226684 223233811 223234333 223386015) 522 (522 nt) HUGO:4764:H3.3A H3F3 [IPR000164:Histone H3; IPR007125:Histone core; IPR007124:Histone-fold/TFIID-TAF/NF-Y; IPR001472:Bipartite nuclear localization signal;]	4	-74.65	422	ENSMUSG00000043033 (mmu-miR-149)	ENSRNOG00000003220 (mmu-miR-144)	hsa-mir-144 hsa-mir-149 hsa-mir-181b hsa-mir-195 hsa-mir-198 mmu-mir-202 hsa-mir-22 rno-mir-330	mmu-mir-202 hsa-mir-195 hsa-mir-22 hsa-mir-181b	0003677 DNA binding NAS; 0006334 nucleosome assembly NAS; 0007001 chromosome organization and biogenesis (sensu Eukarya) NAS; 0000786 nucleosome NAS; 0005634 nucleus IEA; 0005694 chromosome IEA;	3' AGAAGGGUACGCGAUAUGGAGA 5' mmu-mir-202 __ ||..:||||.|.||||||:|:| __ 5' UCCAUCCAUUCACUAUACUUUU 3' ENST00000295172 E:-18.49 S:110.000000 Loc:405 Cons: 100.00%(mmu) 100.00%(rno)	3' CGGUUAUA-AAGACACGACGAU 5' hsa-mir-195 __ |:|..|:|.||||||||||:|. __ 5' GUC--UGUCUUCUGUGCUGUUC 3' ENST00000295172 E:-18.98 S:110.000000 Loc:469 Cons: %(mmu) 95.00%(rno)	3' UGUC--AAGAAGUUGACCGUCGAA 5' hsa-mir-22 __ ||||...||....|:||||||:|| __ 5' ACAGAAAUCAGGUAUUGGCAGUUU 3' ENST00000295172 E:-19.73 S:103.000000 Loc:150 Cons: %(mmu) 91.67%(rno)	3' UUGGGUGGCUGUCGUU-ACUUACAA 5' hsa-mir-181b __ ..|::|::||::||||.|.||||.| __ 5' UUCUUAUUGAUGGCAACUAAAUGGU 3' ENST00000295172 E:-17.450001 S:99.000000 Loc:353 Cons: 92.00%(mmu) %(rno)
ENST00000272298	ENSG00000143933	CALM2	1		ENSMUSG00000036438	ENSRNOG00000004060	CALMODULIN. [Source:SWISSPROT;Acc:P02593] ENSG00000143933 (-1) (47361839 47362449 47372437 47378189 47356961) 610 (610 nt) HUGO:1449:PHKD [IPR002048:Calcium-binding EF-hand; IPR001125:Recoverin;]	4	-78.53	421	ENSMUSG00000036438 (mmu-miR-127)		hsa-mir-127 hsa-mir-136 hsa-mir-195 hsa-mir-205 mmu-mir-293 hsa-mir-31	hsa-mir-136 hsa-mir-195 hsa-mir-31 mmu-mir-293	0005509 calcium ion binding TAS; 0005515 protein binding TAS; 0007186 G-protein coupled receptor protein signaling pathway TAS; 0005737 cytoplasm TAS; 0005886 plasma membrane TAS; 0001539 ciliary/flagellar motility IEA; 0009288 flagellum (sensu Bacteria) IEA; 0016301 kinase activity IEA;	3' AGGUAGUAGUUUUG--UUUACCUCA 5' hsa-mir-136 __ |.||.||||.||||..|:||||||| __ 5' UGCA-CAUCUAAACUUAGAUGGAGU 3' ENST00000272298 E:-20.51 S:115.000000 Loc:244 Cons: 91.67%(mmu) %(rno)	3' CGGUUAUAAAGACACGACGAU 5' hsa-mir-195 __ ..|.||.|||:|||.|||||: __ 5' CACUAUUUUUUUGUACUGCUG 3' ENST00000272298 E:-17.559999 S:106.000000 Loc:446 Cons: 100.00%(mmu) %(rno)	3' GUCGAU-ACGGUCGUAGAACGG 5' hsa-mir-31 __ :||..|.||:||||||.|||:: __ 5' UAGGAACUGUCAGCAUGUUGUU 3' ENST00000272298 E:-19.35 S:102.000000 Loc:319 Cons: 95.45%(mmu) %(rno)	3' UGUGAUGUUUGAGACGC-CGUGA 5' mmu-mir-293 __ :.::|::.|||||||||.|.||| __ 5' GAGUUGU-AACUCUGCGUGGACU 3' ENST00000272298 E:-21.110001 S:98.000000 Loc:354 Cons: 90.91%(mmu) %(rno)
ENST00000219627_P	ENSG00000103342	GSPT1	1		ENSMUSG00000022497	ENSRNOG00000002335	G1 TO S PHASE TRANSITION PROTEIN 1 HOMOLOG (GTP-BINDING PROTEIN GST1-HS). [Source:SWISSPROT;Acc:P15170] ENSG00000103342 (-1) (11933411 11933411 11976246 11976247 11911831) 4001 (4001 nt) HUGO:4622:eRF3b FLJ10441 [IPR001687:ATP/GTP-binding site motif A (P-loop); IPR000795:Elongation factor, GTP-binding; IPR004160:Elongation factor Tu, C-terminal; IPR004161:Elongation factor Tu, domain 2;]	4	-83.07	420	ENSMUSG00000022497 (mmu-miR-103)		hsa-mir-103 hsa-mir-107 hsa-mir-152 mmu-mir-202 hsa-mir-27a rno-mir-325	hsa-mir-107 mmu-mir-202 hsa-mir-27a rno-mir-325	0003746 translation elongation factor activity IEA; 0005525 GTP binding IEA; 0006414 translational elongation IEA; 0003924 GTPase activity TAS; 0000074 regulation of cell cycle TAS; 0000082 G1/S transition of mitotic cell cycle TAS; 0008283 cell proliferation TAS;	3' ACUAUCGGGACAUGUUACGACGA 5' hsa-mir-107 __ ||||:.|||||.|||||.|||:. __ 5' UGAUGACCCUGCACAAUACUGUG 3' ENST00000219627_P E:-23.860001 S:119.000000 Loc:11 Cons: 100.00%(mmu) %(rno)	3' AGAAGGGUACGCGAUAUGGAGA 5' mmu-mir-202 __ |||.|||||.:|.||.|||||| __ 5' UCUGCCCAU-UGAUAAACCUCU 3' ENST00000219627_P E:-20.33 S:109.000000 Loc:81 Cons: 95.24%(mmu) %(rno)	3' CCGCCUUGAAUCGGUGAC-ACUU 5' hsa-mir-27a __ .||...:||..|||||||.|||| __ 5' AGCUCUGCUAUGCCACUGUUGAA 3' ENST00000219627_P E:-19.719999 S:101.000000 Loc:169 Cons: 91.30%(mmu) %(rno)	3' UGUGAAUGACUCGUGGAUGAUCC 5' rno-mir-325 __ |||..||.|||..||||||.||| __ 5' ACA-AUAAUGAAAACCUAC-AGG 3' ENST00000219627_P E:-19.16 S:91.000000 Loc:288 Cons: 100.00%(mmu) %(rno)
ENST00000261359_P	ENSG00000115760	BIRC6	1		ENSMUSG00000024073	ENSRNOG00000027198	BACULOVIRAL IAP REPEAT-CONTAINING PROTEIN 6 (UBIQUITIN-CONJUGATING BIR-DOMAIN ENZYME APOLLON). [Source:SWISSPROT;Acc:Q9NR09] ENSG00000115760 (1) (32556849 32556849 32817506 32817506 32827714) 4001 (40 HUGO:13516: [IPR000345:Cytochrome c heme-binding site; IPR000608:Ubiquitin-conjugating enzymes; IPR001370:Baculovirus inhibitor of apoptosis protein repeat (BIR);]	4	-84.17	420	ENSMUSG00000024073 (mmu-miR-15b)		hsa-mir-15b rno-mir-151 mmu-mir-300 rno-mir-341	mmu-mir-300 rno-mir-151 hsa-mir-15b rno-mir-341	0004840 ubiquitin conjugating enzyme activity TAS; 0004869 cysteine protease inhibitor activity IEA; 0008189 apoptosis inhibitor activity IEA; 0016874 ligase activity IEA; 0006512 ubiquitin cycle IEA; 0006916 anti-apoptosis TAS; 0005622 intracellular IEA; 0008372 cellular_component unknown ND;	3' CUUCUCUCGAACGGGAACGUAU 5' mmu-mir-300 __ ..:||||.|||||.||||:||: __ 5' CUGGAGA-CUUGCACUUGUAUG 3' ENST00000261359_P E:-22.780001 S:111.000000 Loc:578 Cons: 100.00%(mmu) %(rno)	3' GGAGUUCCUCGGAGUCAGAUCA 5' rno-mir-151 __ |||:||||||.:.||||:||.| __ 5' CCUUAAGGAGAUCCAGUUUAAU 3' ENST00000261359_P E:-24.950001 S:110.000000 Loc:118 Cons: 95.45%(mmu) %(rno)	3' ACAUUUGGUACUACACGACGAU 5' hsa-mir-15b __ |||||||:.|..||||||.:|| __ 5' UGUAAACUUUUUUGUGCUUUUA 3' ENST00000261359_P E:-17.879999 S:108.000000 Loc:172 Cons: 100.00%(mmu) %(rno)	3' UGACUGGCUGGCUGGCUAGCU 5' rno-mir-341 __ |:||...||.|.||:|||:|: __ 5' AUUGUGAGAACCACUGAUUGG 3' ENST00000261359_P E:-18.559999 S:91.000000 Loc:201 Cons: 100.00%(mmu) %(rno)
ENST00000043402_P	ENSG00000040608	RTN4R	1		ENSMUSG00000043811	ENSRNOG00000001882	RETICULON 4 RECEPTOR PRECURSOR (NOGO RECEPTOR) (NGR) (NOGO-66 RECEPTOR). [Source:SWISSPROT;Acc:Q9BZR6] ENSG00000040608 (-1) (18603788 18603788 18605188 18605188 18478678) 4001 (4001 nt) HUGO:18601:NOGOR [IPR001611:Leucine-rich repeat; IPR000483:Cysteine-rich flanking region, C-terminal;]	4	-92.73	419	ENSMUSG00000043811 (mmu-miR-10a)	ENSRNOG00000001882 (hsa-miR-105)	hsa-mir-10a hsa-mir-105 hsa-mir-135 mmu-mir-202 rno-mir-326	hsa-mir-105 mmu-mir-202 hsa-mir-10a rno-mir-326	0004872 receptor activity NAS; 0007409 axonogenesis NAS; 0016020 membrane NAS;	3' UGUCCUCAG-ACUCGUAAACU 5' hsa-mir-105 __ .::||||||.||||||.|||: __ 5' UUGGGAGUCGUGAGCACUUGG 3' ENST00000043402_P E:-24.969999 S:114.000000 Loc:2471 Cons: 90.48%(mmu) 90.48%(rno)	3' AGAAGGGUACGCGAUA-UGGAGA 5' mmu-mir-202 __ ||||::|.|..|||:|.:||||| __ 5' UCUUUUCUUAAGCUGUGGCCUCU 3' ENST00000043402_P E:-21.82 S:107.000000 Loc:287 Cons: 95.65%(mmu) 95.65%(rno)	3' GUGUUUAAGCCUAGAUGUCCCAU 5' hsa-mir-10a __ |||....||..:|:||||||||. __ 5' CACCCCAUCAUGUUUACAGGGUU 3' ENST00000043402_P E:-19.040001 S:103.000000 Loc:154 Cons: 100.00%(mmu) %(rno)	3' UGACCUCCUUCCCGGGUCUCC 5' rno-mir-326 __ :|.|.|||.|||||:|..||| __ 5' GCGGCAGGCAGGGCUCCCAGG 3' ENST00000043402_P E:-26.9 S:95.000000 Loc:2300 Cons: %(mmu) 90.48%(rno)
ENST00000262033	ENSG00000110958		1		ENSMUSG00000040078	ENSRNOG00000002642	TELOMERASE-BINDING PROTEIN P23 (HSP90 CO-CHAPERONE) (PROGESTERONE RECEPTOR COMPLEX P23). [Source:SWISSPROT;Acc:Q15185] ENSG00000110958 (-1) (55343403 55344530 55353115 55368048 55326025) 1127 (1127 nt []	4	-77.25	415	ENSMUSG00000040078 (mmu-let-7g)	ENSRNOG00000002642 (mmu-let-7g)	hsa-let-7g hsa-mir-103 hsa-mir-107 hsa-mir-135 hsa-mir-181c hsa-mir-199a* hsa-mir-200a hsa-mir-30a rno-mir-337 rno-mir-349	hsa-mir-107 hsa-mir-181c hsa-mir-199a* rno-mir-349	0003754 chaperone activity IEA; 0005515 protein binding TAS; 0007165 signal transduction TAS;	3' ACUAUCGGGACAUGUUACGACGA 5' hsa-mir-107 __ .||.||..|||||||.||:|||| __ 5' AGAAAG--CUGUACAUUGUUGCU 3' ENST00000262033 E:-21.43 S:115.000000 Loc:659 Cons: 100.00%(mmu) 100.00%(rno)	3' UGAGUGGCUGUCCAACU-UACAA 5' hsa-mir-181c __ .:||||:.|.:||||||.||||. __ 5' CUUCACU-AAGGGUUGAUAUGUA 3' ENST00000262033 E:-18.34 S:104.000000 Loc:154 Cons: 95.45%(mmu) 95.45%(rno)	3' UUGGUUACACGUCUG-AUGACAU 5' hsa-mir-199a* __ ..|:||.|.|||||:.|:||||| __ 5' CUCUAAAG-GCAGAUAUGCUGUA 3' ENST00000262033 E:-19.92 S:103.000000 Loc:87 Cons: 95.45%(mmu) 95.45%(rno)	3' UCUCCAA-UUCUGUCGUCCCGAC 5' rno-mir-349 __ ..|.|||.|.|||||::|||.|. __ 5' UUAUGUUCAUGACAGUGGGGAUU 3' ENST00000262033 E:-17.559999 S:93.000000 Loc:816 Cons: 95.65%(mmu) 95.65%(rno)
ENST00000163282	ENSG00000065978	NSEP1	1		ENSMUSG00000028639	ENSRNOG00000008122	NUCLEASE SENSITIVE ELEMENT BINDING PROTEIN 1 (Y BOX BINDING PROTEIN-1) (Y-BOX TRANSCRIPTION FACTOR) (YB-1) (CCAAT-BINDING TRANSCRIPTION FACTOR I SUBUNIT A) (CBF-A) (ENHANCER FACTOR I SUBUNIT A) (EFI-A HUGO:8014:BP-8 CSDB DBPB MDR-NF1 NSEP-1 YB-1 YB1 YBX1 [IPR002059:Cold-shock DNA-binding domain;]	4	-77.77	413	ENSMUSG00000028639 (mmu-let-7e)		hsa-let-7e hsa-let-7a hsa-let-7f hsa-mir-136 hsa-mir-18 hsa-mir-216 rno-mir-325	hsa-mir-136 hsa-mir-216 rno-mir-325 98	0003677 DNA binding TAS; 0016564 transcriptional repressor activity NAS; 0006355 regulation of transcription, DNA-dependent NAS; 0005634 nucleus NAS; 0003690 double-stranded DNA binding TAS; 0003697 single-stranded DNA binding TAS; 0003700 transcription factor activity TAS; 0006355 regulation of transcription, DNA-dependent IEA; 0006366 transcription from Pol II promoter TAS; 0009613 response to …	3' AGGUAGUAGUUUUGUU-UACCUCA 5' hsa-mir-136 __ |.|||:|||.|.:||:.||||:|| __ 5' UGCAUUAUCUAUGCAGCAUGGGGU 3' ENST00000163282 E:-21.23 S:109.000000 Loc:148 Cons: 95.83%(mmu) %(rno)	3' GUGU-CAACGG-UCGACUCUAAU 5' hsa-mir-216 __ ||:|..|.|:|.||:|||||||. __ 5' CAUAUCUGGUCAAGUUGAGAUUU 3' ENST00000163282 E:-18.15 S:106.000000 Loc:277 Cons: 91.30%(mmu) %(rno)	3' UGUGAAUGAC--UCGUGGAUGAUCC 5' rno-mir-325 __ ..||..||||..|||||||::||.. __ 5' CAACAAACUGCAAGCACCUGUUAAU 3' ENST00000163282 E:-20.58 S:102.000000 Loc:361 Cons: 92.00%(mmu) %(rno)	3' UUGAUAUGUUAGAUGAUGG-AGU 5' hsa-let-7f __ ::||.|||.||||.|||||.||| __ 5' GGCU-UACCAUCU-CUACCAUCA 3' ENST00000163282 E:-17.809999 S:96.000000 Loc:5 Cons: 95.24%(mmu) %(rno)
ENST00000313914	ENSG00000138668	HNRPD	1		ENSMUSG00000000568	ENSRNOG00000002292	HETEROGENEOUS NUCLEAR RIBONUCLEOPROTEIN D0 (HNRNP D0) (AU-RICH ELEMENT RNA-BINDING PROTEIN 1). [Source:SWISSPROT;Acc:Q14103] ENSG00000138668 (-1) (83732889 83734882 83753226 83753514 82851457) 844 (84 HUGO:5036:AUF1 [IPR000504:RNA-binding region RNP-1 (RNA recognition motif);]	4	-77.67	412		ENSRNOG00000002292 (mmu-miR-126*)	hsa-mir-126* hsa-mir-183 hsa-mir-199b hsa-mir-199a rno-mir-20* mmu-mir-202 hsa-mir-28 hsa-mir-93	mmu-mir-202 rno-mir-20* hsa-mir-199b hsa-mir-93	0003677 DNA binding IEA; 0003723 RNA binding TAS; 0006355 regulation of transcription, DNA-dependent IEA; 0006396 RNA processing TAS; 0006401 RNA catabolism TAS; 0007004 telomerase-dependent telomere maintenance IEA; 0000781 chromosome, telomeric region IEA; 0005634 nucleus TAS; 0030529 ribonucleoprotein complex IEA; 0003676 nucleic acid binding IEA; 0003729 mRNA binding NAS; 0006402 mRNA catabol…	3' AGAAGGGUACGCGAUAUGGAGA 5' mmu-mir-202 __ .:|||::|..:|||||:|:||. __ 5' AUUUCUUAAUUGCUAUGCUUCA 3' ENST00000313914 E:-20.440001 S:110.000000 Loc:206 Cons: %(mmu) 100.00%(rno)	3' ACAUU--CACGAGCAUUACGUCA 5' rno-mir-20* __ |||:|..|||.||.|:|||:||| __ 5' UGUGACAGUG-UCAUGAUGUAGU 3' ENST00000313914 E:-17.68 S:106.000000 Loc:293 Cons: %(mmu) 90.91%(rno)	3' CUUGUCUAUCAGAUUUGUGACCC 5' hsa-mir-199b __ |||::||.|||.|.:||::|||| __ 5' GAAUGGA-AGUAU-GACGUUGGG 3' ENST00000313914 E:-21.15 S:99.000000 Loc:128 Cons: %(mmu) 90.48%(rno)	3' GAUGGACGUGCUUGUCGUGAAA 5' hsa-mir-93 __ |.|||||..|.||:||||.||. __ 5' CCACCUG--CUAAUAGCAGUUC 3' ENST00000313914 E:-18.4 S:97.000000 Loc:81 Cons: %(mmu) 100.00%(rno)
ENST00000320719	ENSG00000169282	KCNAB1	1		ENSMUSG00000027827	ENSRNOG00000010422	VOLTAGE-GATED POTASSIUM CHANNEL BETA-1 SUBUNIT (K+ CHANNEL BETA-1 SUBUNIT) (KV-BETA-1). [Source:SWISSPROT;Acc:Q14722] ENSG00000169282 (1) (157159314 157159314 157575449 157577456 157713312) 2007 (2007 HUGO:6228:AKR6A3 hKvb3 hKvBeta3 KCNA1B Kvb1.3 [IPR001395:Aldo/keto reductase; IPR001472:Bipartite nuclear localization signal; IPR001687:ATP/GTP-binding site motif A (P-loop);]	4	-83	410	ENSMUSG00000027827 (mmu-miR-17_5p)	ENSRNOG00000010422 (mmu-let-7a)	hsa-let-7a hsa-mir-17_5p hsa-mir-189 hsa-mir-198 rno-mir-352 hsa-mir-93 hsa-mir-98	hsa-mir-17_5p rno-mir-352 hsa-mir-189 hsa-mir-198	0005249 voltage-gated potassium channel activity IEA; 0015459 potassium channel regulator activity TAS; 0006811 ion transport IEA; 0006813 potassium ion transport TAS; 0005737 cytoplasm NR; 0016021 integral to membrane IEA;	3' UGAUGGACGUGACAUUCGUGAAAC 5' hsa-mir-17_5p __ ||||:.||||.||.|||:.||||| __ 5' ACUAUAUGCA-UGAAAGUUCUUUG 3' ENST00000320719 E:-18.84 S:113.000000 Loc:1222 Cons: 91.30%(mmu) %(rno)	3' AUGAUACGUUGGAUGAUGAGA 5' rno-mir-352 __ .|||..|||:|:|:||:|||. __ 5' CACUUAGCAGCUUGCUGCUCA 3' ENST00000320719 E:-23.219999 S:108.000000 Loc:87 Cons: 95.24%(mmu) 100.00%(rno)	3' UGACUAUAGUCGAGUCAUCCGUG 5' hsa-mir-189 __ |||...|.|.|||:.|||||||| __ 5' ACUUUCAACUGCUU-GUAGGCAC 3' ENST00000320719 E:-20.33 S:98.000000 Loc:906 Cons: 95.45%(mmu) %(rno)	3' GGAUAGAGGGG-AG-ACCUGG 5' hsa-mir-198 __ :||||:|:|::.||.|||||: __ 5' UCUAUUUUCUUAUCUUGGACU 3' ENST00000320719 E:-20.610001 S:91.000000 Loc:195 Cons: 90.48%(mmu) %(rno)
ENST00000262049	ENSG00000111406	PCBP2	1		ENSMUSG00000023049	ENSRNOG00000015083	POLY(RC)-BINDING PROTEIN 2 (ALPHA-CP2) (HNRNP-E2). [Source:SWISSPROT;Acc:Q15366] ENSG00000111406 (1) (52132180 52134852 52159493 52159883 52180973) 390 (390 nt) HUGO:8648:hnRNP-E2 HNRPE2 [IPR004087:KH domain; IPR004088:KH domain, type 1;]	4	-76.13	409	ENSMUSG00000023049 (mmu-miR-106b)	ENSRNOG00000015083 (mmu-miR-106b)	hsa-mir-106b hsa-mir-184 hsa-mir-206 hsa-mir-28 hsa-mir-320 rno-mir-342	hsa-mir-184 rno-mir-342 hsa-mir-106b hsa-mir-206	0003677 DNA binding IEA; 0003723 RNA binding IDA; 0016071 mRNA metabolism NAS; 0005634 nucleus NAS; 0005737 cytoplasm NAS; 0030529 ribonucleoprotein complex IEA;	3' UGGGAAU-AGUCAAGAGGCAGGU 5' hsa-mir-184 __ ::::|.|.||..|||||:||:|| __ 5' GUUUUAAUUCCUUUCUCUGUUCA 3' ENST00000262049 E:-18.530001 S:109.000000 Loc:159 Cons: 95.65%(mmu) 91.30%(rno)	3' CUGCCCACGCUAAAGACACACUCU 5' rno-mir-342 __ |||.||.||..|||||.|||||.. __ 5' GACUGGAGCUUUUUCUUUGUGAAU 3' ENST00000262049 E:-17.43 S:107.000000 Loc:346 Cons: %(mmu) 100.00%(rno)	3' UAGACGUGACAGUCGUGAAAU 5' hsa-mir-106b __ .||||:|.||||||.|.|||. __ 5' UUCUGUAAUGUCAGGAAUUUU 3' ENST00000262049 E:-19.15 S:102.000000 Loc:307 Cons: 100.00%(mmu) 100.00%(rno)	3' GGUGUGUGAAGGAAUGUAAGGU 5' hsa-mir-206 __ |:|||||...|:|||:..|||| __ 5' CUACACA---CUUUAUCAUCCA 3' ENST00000262049 E:-21.02 S:91.000000 Loc:118 Cons: 100.00%(mmu) 100.00%(rno)
ENST00000201955	ENSG00000088297	NCOA6	1		ENSMUSG00000038369	ENSRNOG00000018288	NUCLEAR RECEPTOR COACTIVATOR 6 (AMPLIFIED IN BREAST CANCER-3 PROTEIN) (CANCER-AMPLIFIED TRANSCRIPTIONAL COACTIVATOR ASC-2) (ACTIVATING SIGNAL COINTEGRATOR-2) (ASC-2) (PEROXISOME PROLIFERATOR-ACTIVATED HUGO:15936:AIB3 ASC2 KIAA0181 NRC PRIP RAP250 TRBP []	4	-78.98	408	ENSMUSG00000038369 (mmu-miR-106b)	ENSRNOG00000018288 (mmu-miR-291_3p)	hsa-mir-106b mmu-mir-133 hsa-mir-133a hsa-mir-214 mmu-mir-291_3p rno-mir-339	hsa-mir-106b mmu-mir-291_3p rno-mir-339 mmu-mir-133	0003682 chromatin binding ISS; 0003713 transcription co-activator activity IDA; 0016563 transcriptional activator activity TAS; 0030331 estrogen receptor binding TAS; 0046965 retinoid X receptor binding TAS; 0046966 thyroid hormone receptor binding IDA; 0001701 embryonic development (sensu Mammalia) ISS; 0006355 regulation of transcription, DNA-dependent IEA; 0006367 transcription initiation from…	3' UAGACGUGACAGUCG-UGAAAU 5' hsa-mir-106b __ .||||:||.||:||:.|:|||| __ 5' UUCUGUACAGUUAGUAAUUUUA 3' ENST00000201955 E:-19.200001 S:110.000000 Loc:85 Cons: 90.91%(mmu) %(rno)	3' CCGU-GUGUUUCACCUUCGUGAAA 5' mmu-mir-291_3p __ .|:|.::::..|||||||:|||.| __ 5' UGUAUUGUGCCGUGGAAGUACUGU 3' ENST00000201955 E:-18.23 S:104.000000 Loc:324 Cons: 91.67%(mmu) 91.67%(rno)	3' ACUCG-AGGACCUCCUGUCCCU 5' rno-mir-339 __ |.|||..|||.|||.||||||. __ 5' UAAGCAGCCUAGAGUACAGGGU 3' ENST00000201955 E:-23.879999 S:102.000000 Loc:277 Cons: 95.45%(mmu) 90.91%(rno)	3' UGUCGAC--CAACUUCCCCUGGUU 5' mmu-mir-133 __ ::|.:||..||.|||..||||||: __ 5' GUAUUUGUUGUAGAAAUGGACCAG 3' ENST00000201955 E:-17.67 S:92.000000 Loc:429 Cons: 91.67%(mmu) %(rno)
ENST00000262862	ENSG00000076716	GPC4	1		ENSMUSG00000031119	ENSRNOG00000002413	GLYPICAN-4 PRECURSOR (K-GLYPICAN). [Source:SWISSPROT;Acc:O75487] ENSG00000076716 (-1) (131140671 131142502 131254600 131254812 131057895) 1831 (1831 nt) HUGO:4452: [IPR001687:ATP/GTP-binding site motif A (P-loop); IPR001863:Glypican;]	4	-80.49	407	ENSMUSG00000031119 (mmu-miR-27b)	ENSRNOG00000002413 (mmu-let-7b)	hsa-let-7b hsa-mir-143 hsa-mir-27b hsa-mir-320 rno-mir-352	hsa-mir-320 hsa-mir-27b rno-mir-352 hsa-mir-143	0004888 transmembrane receptor activity IEA; 0007275 development IEA; 0007345 embryogenesis and morphogenesis TAS; 0008283 cell proliferation TAS; 0005578 extracellular matrix IEA; 0005888 proteoglycan integral to plasma membrane TAS; 0016020 membrane IEA;	3' AAGCGGGAGAGUUGGGUCGAAAA 5' hsa-mir-320 __ ||:|:::||||.|::|||:|||. __ 5' UUUGUUUUCUC-AUUCAGUUUUG 3' ENST00000262862 E:-22.92 S:117.000000 Loc:147 Cons: 90.91%(mmu) %(rno)	3' GUCUUGA-AUCGGU-GACACUU 5' hsa-mir-27b __ |||||||.|||::|.:||||.| __ 5' CAGAACUAUAGUUAGUUGUGCA 3' ENST00000262862 E:-19.42 S:97.000000 Loc:244 Cons: 90.91%(mmu) %(rno)	3' AUGAUACGUUGGAUGAUGAGA 5' rno-mir-352 __ |||||||:::||.|||:.|:| __ 5' UACUAUGUGGCC-ACUGGUUU 3' ENST00000262862 E:-19.99 S:97.000000 Loc:114 Cons: 95.00%(mmu) %(rno)	3' ACUCGAUGUCAC-GAAGUAGAGU 5' hsa-mir-143 __ ..||||.|||.|.||.|||:||| __ 5' AUAGCU-CAGGGUCUACAUUUCA 3' ENST00000262862 E:-18.16 S:96.000000 Loc:1679 Cons: %(mmu) 95.45%(rno)
ENST00000281455	ENSG00000151726	FACL6	1		ENSMUSG00000018796	ENSRNOG00000010633	LONG-CHAIN-FATTY-ACID--COA LIGASE 2 (EC 6.2.1.3) (LONG-CHAIN ACYL-COA SYNTHETASE 2) (LACS 2). [Source:SWISSPROT;Acc:P33121] ENSG00000151726 (-1) (186372645 186374169 186420558 186420558 186346055) 152 HUGO:3568: [IPR000873:AMP-dependent synthetase and ligase;]	4	-74.44	400	ENSMUSG00000018796 (mmu-miR-142_5p)	ENSRNOG00000010633 (mmu-miR-142_5p)	hsa-mir-142_5p hsa-mir-181a mmu-mir-201 rno-mir-345	hsa-mir-181a mmu-mir-201 hsa-mir-142_5p rno-mir-345	0000287 magnesium ion binding IEA; 0004467 long-chain-fatty-acid-CoA ligase activity TAS; 0016874 ligase activity IEA; 0006631 fatty acid metabolism NR; 0007586 digestion TAS; 0008152 metabolism IEA;	3' UGAGUGG--CUGUCGCAACUUACAA 5' hsa-mir-181a __ ..|||||..|:.:|:.||||||||| __ 5' UGUCACCUUGG-GGUUUUGAAUGUU 3' ENST00000281455 E:-18.74 S:109.000000 Loc:1410 Cons: 91.67%(mmu) 91.67%(rno)	3' UCUUGUUACGGAAUGACUCAU 5' mmu-mir-201 __ ||||||.||||||||..|||. __ 5' AGAACACUGCCUUAC--AGUC 3' ENST00000281455 E:-19.940001 S:102.000000 Loc:161 Cons: 94.74%(mmu) 94.74%(rno)	3' CAUCACGAAAGAUGAA-AUAC 5' hsa-mir-142_5p __ ..||||:|..|||:||.|||| __ 5' UAAGUGUUGGCUAUUUCUAUG 3' ENST00000281455 E:-17.629999 S:96.000000 Loc:1439 Cons: 90.48%(mmu) 90.48%(rno)	3' CGUGACCUGAUCCCCAGUCGU 5' rno-mir-345 __ .|.||...|.||||||:||.| __ 5' UCUCUAAUCAAGGGGUUAGGA 3' ENST00000281455 E:-18.129999 S:93.000000 Loc:326 Cons: %(mmu) 90.48%(rno)
ENST00000320468	ENSG00000122756	CNTFR	1		ENSMUSG00000028444	ENSRNOG00000014121	CILIARY NEUROTROPHIC FACTOR RECEPTOR ALPHA PRECURSOR (CNTFR ALPHA). [Source:SWISSPROT;Acc:P26992] ENSG00000122756 (-1) (34541432 34542069 34558979 34579722 34511694) 637 (637 nt) HUGO:2170: [IPR003530:Long hematopoietin receptor, soluble alpha chain; IPR003961:Fibronectin, type III; IPR007110:Immunoglobulin-like; IPR002996:Cytokine receptor, common beta/gamma chain;]	4	-78.93	398	ENSMUSG00000028444 (mmu-miR-135)	ENSRNOG00000014121 (mmu-miR-135)	hsa-mir-135 hsa-mir-198 hsa-mir-199a* hsa-mir-21 hsa-mir-210 hsa-mir-214 hsa-mir-28 mmu-mir-291_3p mmu-mir-294 hsa-mir-321 rno-mir-337	mmu-mir-291_3p hsa-mir-21 hsa-mir-135 hsa-mir-199a*	0004872 receptor activity IEA; 0004897 ciliary neurotrophic factor receptor activity TAS; 0015025 GPI-anchored membrane-bound receptor TAS; 0007165 signal transduction NR; 0007399 neurogenesis TAS; 0016020 membrane IEA;	3' CCGUGUGUUUCACCUUCGUGAAA 5' mmu-mir-291_3p __ .||||||:::..|||:|..|||| __ 5' UGCACACGGGCAGGAGGACCUUU 3' ENST00000320468 E:-22.07 S:102.000000 Loc:84 Cons: 100.00%(mmu) 100.00%(rno)	3' AGUUGUAGUCAGACUAUUCGAU 5' hsa-mir-21 __ .||.||||||.:|.|||||||. __ 5' CCACCAUCAGAUU-AUAAGCUC 3' ENST00000320468 E:-17.299999 S:102.000000 Loc:379 Cons: 100.00%(mmu) %(rno)	3' AGUGUAUCCUUAUUUUUCGGUAU 5' hsa-mir-135 __ .::||.||||:.|::|:|||:.| __ 5' CUGCAGAGGAGCAGGAGGCCGGA 3' ENST00000320468 E:-20.780001 S:100.000000 Loc:32 Cons: 95.65%(mmu) 95.65%(rno)	3' UUGGUUACACGUCUGAUGACAU 5' hsa-mir-199a* __ |.:|||||.|:|..:|:||||| __ 5' ACUCAAUG-GUAACUUGCUGUA 3' ENST00000320468 E:-18.780001 S:94.000000 Loc:544 Cons: 100.00%(mmu) %(rno)
ENST00000262158_P	ENSG00000101665	MADH7	1		ENSMUSG00000025880	ENSRNOG00000018359	MOTHERS AGAINST DECAPENTAPLEGIC HOMOLOG 7 (SMAD 7) (MOTHERS AGAINST DPP HOMOLOG 7) (SMAD7) (HSMAD7). [Source:SWISSPROT;Acc:O15105] ENSG00000101665 (-1) (44699729 44699729 44728781 44728781 43819466) 4 HUGO:6773:MADH8 SMAD7 [IPR004863:MH1 domain; IPR001132:Dwarfin protein;]	4	-84.51	397	ENSMUSG00000025880 (mmu-miR-101b)	ENSRNOG00000018359 (rno-miR-101b)	rno-mir-101b hsa-mir-106b hsa-mir-17_5p hsa-mir-181b hsa-mir-189 hsa-mir-198 hsa-mir-24	hsa-mir-189 hsa-mir-17_5p hsa-mir-181b hsa-mir-198	0005076 receptor signaling protein serine/threonine kinase signaling protein activity NR; 0005515 protein binding TAS; 0030617 TGFbeta receptor, inhibitory cytoplasmic mediator activity TAS; 0006355 regulation of transcription, DNA-dependent IEA; 0006950 response to stress TAS; 0007179 TGFbeta receptor signaling pathway TAS; 0005622 intracellular IEA;	3' UGACUAUAGUCGAGUCAUCCGUG 5' hsa-mir-189 __ ||||.|.|:||||||.|:.|||: __ 5' ACUGUUCUUAGCUCAAUGAGCAU 3' ENST00000262158_P E:-19.85 S:107.000000 Loc:1086 Cons: 100.00%(mmu) 95.65%(rno)	3' UGAUGGA-CGUGACAUUCGUGAAAC 5' hsa-mir-17_5p __ :..|::|.|||:|||.||::||||| __ 5' GAAAUUUAGCAUUGU-AGUGCUUUG 3' ENST00000262158_P E:-20.51 S:105.000000 Loc:1182 Cons: 95.83%(mmu) %(rno)	3' UUGGGUGGCUGUCGUUACUUACAA 5' hsa-mir-181b __ ...:||||..:|||..|||||||| __ 5' UUAUCACC--UAGC--UGAAUGUU 3' ENST00000262158_P E:-18.99 S:94.000000 Loc:1453 Cons: 100.00%(mmu) 100.00%(rno)	3' GGAUAGAGGGGAGACCUGG 5' hsa-mir-198 __ .|.||||.|:|.|||||:| __ 5' GCCAUCUGCUC-CUGGAUC 3' ENST00000262158_P E:-25.16 S:91.000000 Loc:734 Cons: %(mmu) 100.00%(rno)
ENST00000262239_P	ENSG00000078304	PPP2R5C	1		ENSMUSG00000017843	ENSRNOG00000004973	SERINE/THREONINE PROTEIN PHOSPHATASE 2A, 56 KDA REGULATORY SUBUNIT, GAMMA ISOFORM (PP2A, B SUBUNIT, B GAMMA ISOFORM) (PP2A, B SUBUNIT, B56 GAMMA ISOFORM) (PP2A, B SUBUNIT, PR61 GAMMA ISOFORM) (PP2A, B HUGO:9311: [IPR002554:Protein phosphatase 2A, regulatory B subunit (B56 family);]	4	-74.24	387	ENSMUSG00000017843 (mmu-miR-130b)	ENSRNOG00000004973 (mmu-miR-130b)	hsa-mir-130b mmu-mir-290 hsa-mir-31 rno-mir-352	hsa-mir-31 rno-mir-352 hsa-mir-130b mmu-mir-290	0008601 protein phosphatase type 2A, intrinsic regulator activity NAS; 0007165 signal transduction NAS; 0000159 protein phosphatase type 2A complex NAS; 0005634 nucleus IDA; 0008601 protein phosphatase type 2A, intrinsic regulator activity IEA; 0007165 signal transduction IEA; 0000159 protein phosphatase type 2A complex IEA; 0046821 extrachromosomal DNA IEA;	3' GUCGAUACGGUCGUAGAACGG 5' hsa-mir-31 __ |||....|||||:||:|||.| __ 5' CAGGGUGGCCAGUAUUUUGAC 3' ENST00000262239_P E:-21.370001 S:100.000000 Loc:1263 Cons: 100.00%(mmu) 100.00%(rno)	3' AUGAUACGUUGGAUGAUGAGA 5' rno-mir-352 __ |:..|||::..||:|||:||| __ 5' UGAGAUGUGUACUGCUAUUCU 3' ENST00000262239_P E:-17.33 S:99.000000 Loc:1309 Cons: %(mmu) 95.24%(rno)	3' UACGGGAAAGUAGUAACGUGAC 5' hsa-mir-130b __ :..:|||||:|.:||||:||.. __ 5' GCUUCCUUUUAAUAUUGUACAU 3' ENST00000262239_P E:-17.73 S:96.000000 Loc:2346 Cons: 90.91%(mmu) 90.91%(rno)	3' UUUUUCACGGGGGUAUCAAACUC 5' mmu-mir-290 __ ...|||||:|:::.||||.||:. __ 5' UCCAAGUGUCUUUUUAGUGUGGC 3' ENST00000262239_P E:-17.809999 S:92.000000 Loc:2314 Cons: 91.30%(mmu) %(rno)
ENST00000309776_P	ENSG00000015171		1		ENSMUSG00000021156	ENSRNOG00000014670	ADENOVIRUS 5 E1A-BINDING PROTEIN (BS69 PROTEIN). [Source:SWISSPROT;Acc:Q15326] ENSG00000015171 (1) (135218 209833 252410 252410 649889) 4001 (4001 nt) [IPR001487:Bromodomain; IPR001965:Zn-finger-like, PHD finger; IPR000313:PWWP domain; IPR002893:Zn-finger, MYND type;]	3	-69.7	352	ENSMUSG00000021156 (mmu-miR-106b)		hsa-mir-106b mmu-mir-201 rno-mir-337 rno-mir-349	rno-mir-349 mmu-mir-201 hsa-mir-106b	0003677 DNA binding IEA; 0000122 negative regulation of transcription from Pol II promoter TAS; 0006355 regulation of transcription, DNA-dependent IEA; 0008283 cell proliferation TAS; 0045786 negative regulation of cell cycle IEA; 0005634 nucleus TAS;	3' UCUCCAAUUCUGUCGUCCCGAC 5' rno-mir-349 __ ..:||||:|.|||||||||||. __ 5' CAGGGUUGACACAGCAGGGCUA 3' ENST00000309776_P E:-30.85 S:131.000000 Loc:527 Cons: 95.45%(mmu) %(rno)	3' UCUUGUUACGGAAUGACUCAU 5' mmu-mir-201 __ :|:::|||.::||||||||.. __ 5' GGGGUAAUCUUUUACUGAGCU 3' ENST00000309776_P E:-19.75 S:111.000000 Loc:665 Cons: 100.00%(mmu) %(rno)	3' UAGACGUGACAGUCG--UGAAAU 5' hsa-mir-106b __ ..:||||:|.|||||..|:|||| __ 5' UGUUGCAUUUUCAGCAAAUUUUA 3' ENST00000309776_P E:-19.1 S:110.000000 Loc:242 Cons: 91.30%(mmu) %(rno)
ENST00000272845	ENSG00000144406		1		ENSMUSG00000026006	ENSRNOG00000028322	ENSG00000144406 (1) (210896496 210896496 211034908 211037581 211069900) 2673 (2673 nt) [IPR001472:Bipartite nuclear localization signal; IPR001687:ATP/GTP-binding site motif A (P-loop);]	3	-77.24	336	ENSMUSG00000026006 (mmu-miR-149)	ENSRNOG00000028322 (mmu-let-7a)	hsa-let-7a hsa-let-7e hsa-mir-149 hsa-mir-30a hsa-mir-31	hsa-mir-30a 117 hsa-mir-149		3' CGACGUUUG-UAGGCUGACUUUC 5' hsa-mir-30a __ .||||.|:|.||::||:||||:| __ 5' CCUGCCAGCAAUUUGAUUGAAGG 3' ENST00000272845 E:-24.879999 S:117.000000 Loc:2146 Cons: 95.65%(mmu) 95.65%(rno)	3' UGAUAUGUUGGAGGAUGGAGU 5' hsa-let-7e __ |:.|||:..|:||||:||||| __ 5' AUCAUAU-CCUUCCUGCCUCA 3' ENST00000272845 E:-22.059999 S:113.000000 Loc:2196 Cons: %(mmu) 100.00%(rno)	3' CCUCACUUCUGUGCCUCGGUCU 5' hsa-mir-149 __ .|||||::|..:|||||||.|. __ 5' AGAGUGGGGUGGCGGAGCCUGC 3' ENST00000272845 E:-30.299999 S:106.000000 Loc:2535 Cons: 90.91%(mmu) %(rno)
ENST00000242261	ENSG00000122691	TWIST2	1		ENSMUSG00000035799	ENSRNOG00000011101	TWIST RELATED PROTEIN 1 (H-TWIST). [Source:SWISSPROT;Acc:Q15672] ENSG00000122691 (-1) (18899578 18900652 18901260 18901614 17811719) 535 (535 nt) HUGO:12428:ACS3 BPES2 BPES3 H-twist HGNC:15457 SCS TWIST [IPR001092:Basic helix-loop-helix dimerization domain bHLH;]	3	-64.73	330	ENSMUSG00000035799 (mmu-miR-154)	ENSRNOG00000011101 (mmu-miR-154)	hsa-mir-154 hsa-mir-199b hsa-mir-199a hsa-mir-206 rno-mir-338 hsa-mir-361 hsa-mir-9	hsa-mir-9 hsa-mir-361 hsa-mir-154	0003677 DNA binding IEA; 0016564 transcriptional repressor activity ISS; 0030154 cell differentiation IEA; 0045668 negative regulation of osteoblast differentiation IDA; 0045892 negative regulation of transcription, DNA-dependent ISS; 0005634 nucleus IDA; 0005737 cytoplasm IDA; 0003702 RNA polymerase II transcription factor activity NR; 0004857 enzyme inhibitor activity TAS; 0005515 protein bindi…	3' AGUAUGUCGAUCUAUUGGUUUCU 5' hsa-mir-9 __ ||.|:.||||:||||||:|||.| __ 5' UC-UGGAGCUGGAUAACUAAAAA 3' ENST00000242261 E:-21.09 S:121.000000 Loc:86 Cons: 100.00%(mmu) 100.00%(rno)	3' CAUGGGGACCUCUAAGACUAUU 5' hsa-mir-361 __ ..|||:||..:.|||||||||: __ 5' ACACCUCU--GCAUUCUGAUAG 3' ENST00000242261 E:-23 S:107.000000 Loc:254 Cons: 100.00%(mmu) 100.00%(rno)	3' GCUUCC-GUUGUGCCUAUUGGAU 5' hsa-mir-154 __ .|||||..||.|:|||.|::||| __ 5' AGAAGGAGAAAAUGGACAGUCUA 3' ENST00000242261 E:-20.639999 S:102.000000 Loc:59 Cons: 95.65%(mmu) 91.30%(rno)
ENST00000300477	ENSG00000167130		1		ENSMUSG00000026856	ENSRNOG00000017663	DOLICHYL PYROPHOSPHATE PHOSPHATASE 1. [Source:RefSeq;Acc:NM_020438] ENSG00000167130 (1) (127219458 127223563 127227331 127228761 127249288) 1430 (1430 nt) [IPR000326:PA-phosphatase related phosphoesterase;]	3	-84.19	325	ENSMUSG00000026856 (mmu-miR-326)	ENSRNOG00000017663 (mmu-miR-199a)	hsa-mir-199a hsa-mir-222 rno-mir-326	rno-mir-326 hsa-mir-222 hsa-mir-199a		3' UGACCUCCUUCCCGGGUCUCC 5' rno-mir-326 __ .||||:||.|||||||||||. __ 5' UCUGGGGGCAGGGCCCAGAGC 3' ENST00000300477 E:-40.23 S:134.000000 Loc:606 Cons: 90.48%(mmu) %(rno)	3' CUCUGGG-UCAUCGGUCUACAUCGA 5' hsa-mir-222 __ .||||||.|||..|||.:||.|||. __ 5' CAGACCCAAGUCACCAAGUGGAGCC 3' ENST00000300477 E:-23.379999 S:98.000000 Loc:97 Cons: %(mmu) 92.00%(rno)	3' UUGUCCAUCAGACUUGU-GACCC 5' hsa-mir-199a __ .|.|||.||.|||.|||.:|||| __ 5' CAAAGG-AGCCUGCACAUUUGGG 3' ENST00000300477 E:-20.58 S:93.000000 Loc:733 Cons: %(mmu) 90.91%(rno)
ENST00000307729_P	ENSG00000078403	MLLT10	1		ENSMUSG00000026743	ENSRNOG00000022249	AF-10 PROTEIN. [Source:SWISSPROT;Acc:P55197] ENSG00000078403 (1) (21827100 21827580 22033169 22033169 22518769) 4001 (4001 nt) HUGO:16063:AF10 [IPR001965:Zn-finger-like, PHD finger; IPR001472:Bipartite nuclear localization signal;]	3	-57.94	323	ENSMUSG00000026743 (mmu-miR-15b)	ENSRNOG00000022249 (mmu-let-7g)	hsa-let-7g hsa-let-7i hsa-mir-15b rno-mir-331	hsa-mir-15b 126 rno-mir-331	0003700 transcription factor activity NR; 0006355 regulation of transcription, DNA-dependent IEA; 0008151 cell growth and/or maintenance IEA; 0005634 nucleus NR;	3' ACAUUUGGUAC-UACACGACGAU 5' hsa-mir-15b __ .|||||::.||.|||||:||:|| __ 5' GGUAAAUUUUGAAUGUGUUGUUA 3' ENST00000307729_P E:-22.200001 S:126.000000 Loc:3297 Cons: 91.30%(mmu) %(rno)	3' UGACAUGUUUGAUGAUGGAGU 5' hsa-let-7g __ |:||.||.|::|.:||||||| __ 5' AUUGCAC-AGUUCUUACCUCA 3' ENST00000307729_P E:-17.67 S:105.000000 Loc:3036 Cons: %(mmu) 90.00%(rno)	3' AAGAUCCUAUCCGGGUCCCCG 5' rno-mir-331 __ ||:||...||.|::||||||. __ 5' UUUUA---UAUGUUCAGGGGA 3' ENST00000307729_P E:-18.07 S:92.000000 Loc:3178 Cons: %(mmu) 100.00%(rno)
ENST00000305960	ENSG00000171723	GPHN	1		ENSMUSG00000047454	ENSRNOG00000028366	GEPHYRIN. [Source:SWISSPROT;Acc:Q9NQX3] ENSG00000171723 (1) (64965275 64965287 65637695 65638556 65646188) 861 (861 nt) HUGO:15465:KIAA1385 [IPR001453:Molybdenum cofactor biosynthesis protein; IPR005110:MoeA N-terminal region, domain I and II; IPR005111:MoeA C-terminal, domain IV; IPR000694:Proline-rich region;]	3	-65.38	322	ENSMUSG00000047454 (mmu-miR-130b)	ENSRNOG00000028366 (mmu-miR-21)	hsa-mir-130b hsa-mir-147 hsa-mir-21 mmu-mir-297 rno-mir-330	rno-mir-330 hsa-mir-130b hsa-mir-21	0006777 Mo-molybdopterin cofactor biosynthesis IEA; 0003824 catalytic activity IEA; 0005856 cytoskeleton IEA;	3' AGAGACGUCCGGGACACGAAACG 5' rno-mir-330 __ |..||||||..|:||||:|||.| __ 5' UGCCUGCAGAACUUGUGUUUUUC 3' ENST00000305960 E:-24.709999 S:111.000000 Loc:300 Cons: 100.00%(mmu) %(rno)	3' UACGGGAAAGUAGUAACGUGAC 5' hsa-mir-130b __ |||:||...:|||||||.|||| __ 5' AUGUCCACAUAUCAUUG-ACUG 3' ENST00000305960 E:-22.74 S:109.000000 Loc:29 Cons: 100.00%(mmu) %(rno)	3' AGUUGU-AGUCAGACUAUU-CGAU 5' hsa-mir-21 __ ||||::.|.:||||||||:.|.|| __ 5' UCAAUGCUAGGUCUGAUAGCGAUA 3' ENST00000305960 E:-17.93 S:102.000000 Loc:251 Cons: 91.67%(mmu) 91.67%(rno)
ENST00000292385	ENSG00000113758	DBN1	1		ENSMUSG00000034675	ENSRNOG00000014170	DREBRIN (DEVELOPMENTALLY REGULATED BRAIN PROTEIN). [Source:SWISSPROT;Acc:Q16643] ENSG00000113758 (-1) (176864466 176865288 176880013 176881001 176817531) 822 (822 nt) HUGO:2695:D0S117E [IPR002108:Actin-binding, cofilin/tropomyosin type; IPR001472:Bipartite nuclear localization signal;]	3	-59.98	319	ENSMUSG00000034675 (mmu-miR-135)	ENSRNOG00000014170 (mmu-miR-135)	hsa-mir-135 hsa-mir-184 mmu-mir-202 hsa-mir-321	hsa-mir-184 mmu-mir-202 hsa-mir-135	0003779 actin binding IEA; 0005622 intracellular IEA; 0003779 actin binding TAS; 0015629 actin cytoskeleton TAS;	3' UGGGAAUAGUCAAGAGGCAGGU 5' hsa-mir-184 __ ..|:||:|.|.|||||:||||| __ 5' CACUUUGU-A-UUCUCUGUCCA 3' ENST00000292385 E:-24.360001 S:117.000000 Loc:420 Cons: 95.00%(mmu) 95.00%(rno)	3' AGAAGGGUACGCGAUAUGGAGA 5' mmu-mir-202 __ |:||||:|.|:.:|||:::||| __ 5' UUUUCCUA-GUUUUAUGUUUCU 3' ENST00000292385 E:-18.43 S:103.000000 Loc:386 Cons: 100.00%(mmu) 100.00%(rno)	3' AGUGUAUCCUUAUUUUUCG-GUAU 5' hsa-mir-135 __ ..||||:|.||||||.:||.|:|: __ 5' AAACAUGGCAAUAAAUGGCUCGUG 3' ENST00000292385 E:-17.190001 S:99.000000 Loc:468 Cons: 95.83%(mmu) 95.83%(rno)
ENST00000230339	ENSG00000112577	DLL1	1		ENSMUSG00000014773	ENSRNOG00000014667	DELTA-LIKE PROTEIN 1 PRECURSOR (DROSOPHILA DELTA HOMOLOG 1) (DELTA1) (H-DELTA-1). [Source:SWISSPROT;Acc:O00548] ENSG00000112577 (-1) (170447810 170448471 170455925 170455989 169955431) 661 (661 nt) HUGO:2908: [IPR000152:Aspartic acid and asparagine hydroxylation site; IPR006209:EGF-like domain; IPR001881:EGF-like calcium-binding; IPR001438:Type II EGF-like signature; IPR002049:Laminin-type EGF-li…	3	-60.61	318	ENSMUSG00000014773 (mmu-miR-128a)		hsa-mir-128a hsa-mir-128b hsa-mir-17_5p rno-mir-351 hsa-mir-363	hsa-mir-17_5p hsa-mir-363 rno-mir-351	0005112 Notch binding IPI; 0005198 structural molecule activity IEA; 0005509 calcium ion binding IEA; 0001701 embryonic development (sensu Mammalia) ISS; 0001709 cell fate determination NAS; 0007154 cell communication IEA; 0007219 N signaling pathway NAS; 0007399 neurogenesis ISS; 0009912 hair cell fate commitment ISS; 0030097 hemopoiesis NAS; 0030154 cell differentiation TAS; 0030155 regulation …	3' UGAUGGACGUGAC--AUUCGUGAAAC 5' hsa-mir-17_5p __ :.||:|||:|..|..|:||:|:|||| __ 5' GAUAUCUGUAAAGCUUGAGUAUUUUG 3' ENST00000230339 E:-21.129999 S:115.000000 Loc:451 Cons: 92.31%(mmu) %(rno)	3' AAUGUCUACC-UAUGGCACGUUA 5' hsa-mir-363 __ .||:..||||.|||::||||||. __ 5' GUAUUUAUGGAAUAUUGUGCAAA 3' ENST00000230339 E:-20.059999 S:111.000000 Loc:563 Cons: 95.65%(mmu) %(rno)	3' GUCCGAGUUUCCCGAGGAGUCCCU 5' rno-mir-351 __ :|.|:.||||.|||.|:||:||.. __ 5' UAUGUACAAA-GGCACUUCGGGUC 3' ENST00000230339 E:-19.42 S:92.000000 Loc:510 Cons: 100.00%(mmu) %(rno)
ENST00000242753_P	ENSG00000123119	EFCBP1	1		ENSMUSG00000040536	ENSRNOG00000007256	EF HAND CALCIUM BINDING PROTEIN 1; SYNAPTOTAGMIN INTERACTING PROTEIN 1; NEURONAL CALCIUM BINDING PROTEIN. [Source:RefSeq;Acc:NM_022351] ENSG00000123119 (1) (91760698 91760698 91924323 91924323 9203916 HUGO:20983: [IPR002048:Calcium-binding EF-hand; IPR007138:Antibiotic biosynthesis monooxygenase;]	3	-63.91	318	ENSMUSG00000040536 (mmu-let-7f)	ENSRNOG00000007256 (mmu-miR-122a)	hsa-let-7f hsa-mir-122a hsa-mir-188	hsa-mir-122a hsa-mir-188 103	0005509 calcium ion binding IEA;	3' UGUUUGUGGUAACAGUGUGAGGU 5' hsa-mir-122a __ |:|||:...|||||||||.|||| __ 5' AUAAAUUGAAUUGUCACAGUCCA 3' ENST00000242753_P E:-24.24 S:124.000000 Loc:3401 Cons: 95.65%(mmu) 95.65%(rno)	3' UGGGAGGUGGU-ACGUUCCCUAC 5' hsa-mir-188 __ .|.:||||::|.|.||||.|||| __ 5' CCAUUCCAUUAUUACAAGUGAUG 3' ENST00000242753_P E:-21.17 S:103.000000 Loc:3174 Cons: %(mmu) 91.30%(rno)	3' UUGAUAUGUUAGAUGAUGGAGU 5' hsa-let-7f __ |.|||||.|||||.|||:|.|| __ 5' ACCUAUAGAAUCU-CUAUC-CA 3' ENST00000242753_P E:-18.5 S:91.000000 Loc:563 Cons: 90.00%(mmu) %(rno)
ENST00000332610	ENSG00000182568	SATB1	1		ENSMUSG00000023927	ENSRNOG00000012942	DNA-BINDING PROTEIN SATB1 (SPECIAL AT-RICH SEQUENCE BINDING PROTEIN 1). [Source:SWISSPROT;Acc:Q01826] ENSG00000182568 (-1) (18364439 18365666 18437463 18437463 17889047) 1227 (1227 nt) HUGO:10541: [IPR001356:Homeobox; IPR003350:Homeodomain protein CUT;]	3	-56.21	317	ENSMUSG00000023927 (mmu-miR-103)	ENSRNOG00000012942 (mmu-miR-122a)	hsa-mir-103 hsa-mir-107 hsa-mir-122a hsa-mir-130a hsa-mir-130b hsa-mir-205 hsa-mir-27b	hsa-mir-122a hsa-mir-130a hsa-mir-205	0003690 double-stranded DNA binding TAS; 0003700 transcription factor activity IEA; 0006325 establishment and/or maintenance of chromatin architecture TAS; 0006355 regulation of transcription, DNA-dependent IEA; 0005634 nucleus TAS;	3' UGUUUGUGGUAACAGUGUGAGGU 5' hsa-mir-122a __ |:||.:|::..|||.:||||||| __ 5' AUAAUUAUUUCUGUAGCACUCCA 3' ENST00000332610 E:-19.17 S:112.000000 Loc:369 Cons: %(mmu) 91.30%(rno)	3' CGGGA-AAAUUGUAACGUGAC 5' hsa-mir-130a __ |||:|.|.|.|:||.|||||| __ 5' GCCUUGUAUUAUAUGGCACUG 3' ENST00000332610 E:-18.42 S:106.000000 Loc:522 Cons: 90.48%(mmu) 95.24%(rno)	3' GUCUGAGGCCACCUUACUUCCU 5' hsa-mir-205 __ :|||||...||||||||.||.. __ 5' UAGACU---GUGGAAUGCAGUU 3' ENST00000332610 E:-18.620001 S:99.000000 Loc:479 Cons: 100.00%(mmu) %(rno)
ENST00000319725	ENSG00000107164	FUBP3	1		ENSMUSG00000026843	ENSRNOG00000009139	FUSE BINDING PROTEIN 3 (FRAGMENT). [Source:SPTREMBL;Acc:Q92946] ENSG00000107164 (1) (128746915 128746915 128787558 128789784 128803598) 1339 (1339 nt) HUGO:4005:FBP3 [IPR004087:KH domain; IPR004088:KH domain, type 1;]	3	-60.58	312		ENSRNOG00000009139 (rno-miR-101b)	rno-mir-101b hsa-mir-122a hsa-mir-24	hsa-mir-24 hsa-mir-122a rno-mir-101b	0003676 nucleic acid binding IEA; 0016563 transcriptional activator activity IDA; 0006350 transcription IDA; 0005634 nucleus NAS;	3' GACAAGGACGACUUGACUCGGU 5' hsa-mir-24 __ .|||...|.||||||||||.|| __ 5' AUGUGAAUUCUGAACUGAGACA 3' ENST00000319725 E:-22.030001 S:112.000000 Loc:553 Cons: %(mmu) 90.91%(rno)	3' UGUUUG-U-GGUAACAGUGUGAGGU 5' hsa-mir-122a __ ||.:||.|.:||||.|:||||||:| __ 5' ACUGACAAUUCAUU-UUACACUCUA 3' ENST00000319725 E:-20.51 S:102.000000 Loc:1276 Cons: %(mmu) 91.67%(rno)	3' GAAGUCGAUAGUGUCAUGACAU 5' rno-mir-101b __ ..|.|.||||:|:.|||:|||| __ 5' ACUGAACUAUUAU-GUAUUGUA 3' ENST00000319725 E:-18.040001 S:98.000000 Loc:526 Cons: %(mmu) 100.00%(rno)
ENST00000261845	ENSG00000069956	MAPK6	1		ENSMUSG00000042688	ENSRNOG00000009381	MITOGEN-ACTIVATED PROTEIN KINASE 6 (EC 2.7.1.37) (EXTRACELLULAR SIGNAL-REGULATED KINASE 3) (ERK-3) (MAP KINASE ISOFORM P97) (P97- MAPK). [Source:SWISSPROT;Acc:Q16659] ENSG00000069956 (1) (50027503 500 HUGO:6879:ERK3 p97MAPK PRKM6 [IPR001687:ATP/GTP-binding site motif A (P-loop); IPR000719:Protein kinase; IPR002290:Serine/Threonine protein kinase;]	3	-56.09	311		ENSRNOG00000009381 (mmu-let-7i)	hsa-let-7i mmu-mir-202 hsa-mir-29a rno-mir-7*	rno-mir-7* 115 hsa-mir-29a	0004674 protein serine/threonine kinase activity TAS; 0004682 protein kinase CK2 activity IEA; 0004691 cAMP-dependent protein kinase activity IEA; 0004707 MAP kinase activity IEA; 0005524 ATP binding IEA; 0016740 transferase activity IEA; 0006468 protein amino acid phosphorylation TAS; 0007049 cell cycle IEA; 0007165 signal transduction TAS; 0016301 kinase activity IEA;	3' AUACCGUCUGACACUAAACAAC 5' rno-mir-7* __ |.||||..|||.||:||||||| __ 5' UUUGGC--ACUAUGGUUUGUUG 3' ENST00000261845 E:-20.42 S:115.000000 Loc:758 Cons: %(mmu) 100.00%(rno)	3' UCGUGUUUGAU-GAUGGAGU 5' hsa-let-7i __ ..||::.::||.|||||||| __ 5' CACAUGUGUUAUCUACCUCA 3' ENST00000261845 E:-18.27 S:101.000000 Loc:476 Cons: %(mmu) 95.00%(rno)	3' UUGGC-UAAAGUCUACCACGAUC 5' hsa-mir-29a __ |.::|.||||::||.||||||.| __ 5' AUUUGUAUUUUGGA-GGUGCUUG 3' ENST00000261845 E:-17.4 S:95.000000 Loc:879 Cons: %(mmu) 90.91%(rno)
ENST00000299505	ENSG00000166398		1		ENSMUSG00000036405	ENSRNOG00000021129	ENSG00000166398 (1) (39437317 39483219 39535700 39538307 39547910) 2607 (2607 nt) []	3	-59.11	310	ENSMUSG00000036405 (mmu-let-7e)	ENSRNOG00000021129 (mmu-miR-15a)	hsa-let-7e hsa-mir-15a hsa-mir-17_5p hsa-mir-23b rno-mir-330	hsa-mir-17_5p rno-mir-330		3' UGAUAUGUUGGAGGAUGGAGU 5' hsa-let-7e __ ::||.|..|:|||||:|||.| __ 5' GUUAAAACAUCUCCUGCCUAA 3' ENST00000299505 E:-20.040001 S:105.000000 Loc:489 Cons: 95.24%(mmu) %(rno)	3' UGAUGGACGUGACAUUCGUGAAAC 5' hsa-mir-17_5p __ :|.|||||.::|.|.||:|||.|| __ 5' GCCACCUGAGUUUUUAGUACUGUG 3' ENST00000299505 E:-17.48 S:104.000000 Loc:1812 Cons: 95.83%(mmu) 91.67%(rno)	3' AGAGACGUCCGGGACACGAAACG 5' rno-mir-330 __ |..:|.||||:.|||.||||.|| __ 5' UAAUUCCAGGUGCUGCGCUUGGC 3' ENST00000299505 E:-21.59 S:101.000000 Loc:2383 Cons: 95.65%(mmu) 100.00%(rno)
ENST00000254081	ENSG00000131773	KHDRBS3	1		ENSMUSG00000022332	ENSRNOG00000009539	KH DOMAIN CONTAINING, RNA BINDING, SIGNAL TRANSDUCTION ASSOCIATED 3; SAM68-LIKE PHOSPHOTYROSINE PROTEIN, T-STAR. [Source:RefSeq;Acc:NM_006558] ENSG00000131773 (1) (136440772 136441166 136630383 136630 HUGO:18117:Etle etoile SALP SLM-2 SLM2 T-STAR [IPR004088:KH domain, type 1;]	3	-54.62	308	ENSMUSG00000022332 (mmu-let-7b)		hsa-let-7b hsa-let-7c hsa-mir-146 hsa-mir-18 mmu-mir-298	hsa-mir-146 hsa-mir-18 mmu-mir-298	0003723 RNA binding NR; 0005515 protein binding TAS; 0007283 spermatogenesis TAS; 0005634 nucleus TAS;	3' UUGGGUACCUUAAGUCAA--GAGU 5' hsa-mir-146 __ ..:||||.|||||:||||..:|:| __ 5' UUUCCAUAGAAUUUAGUUAUUUUA 3' ENST00000254081 E:-17.5 S:106.000000 Loc:335 Cons: 91.67%(mmu) %(rno)	3' AUAGACGUGAUCUACGUGGAAU 5' hsa-mir-18 __ .|||||.|.|:||||.|.|||| __ 5' AAUCUG-AAUGGAUGGAACUUA 3' ENST00000254081 E:-18.35 S:104.000000 Loc:109 Cons: 100.00%(mmu) %(rno)	3' CCUUCUUGUCGGGAGGAG-ACGG 5' mmu-mir-298 __ ..|||.|.||.:||||||.|||: __ 5' UUAAGCAAAG-UCUCCUCUUGCU 3' ENST00000254081 E:-18.77 S:98.000000 Loc:479 Cons: 90.91%(mmu) %(rno)
ENST00000303569	ENSG00000160741		1		ENSMUSG00000027936	ENSRNOG00000016138	ENSG00000160741 (-1) (151136946 151137377 151147765 151147835 151135965) 431 (431 nt) []	3	-70.27	308	ENSMUSG00000027936 (mmu-miR-135)	ENSRNOG00000016138 (mmu-miR-135)	hsa-mir-135 hsa-mir-205 mmu-mir-291_3p rno-mir-328 rno-mir-347	rno-mir-328 hsa-mir-205 rno-mir-328		3' UGCCUUCCCGUCUCUCCCGGUC 5' rno-mir-328 __ .:|.|:.||.:|||||.||||| __ 5' UUGCAGUGGAGGAGAGAGCCAG 3' ENST00000303569 E:-24.43 S:111.000000 Loc:354 Cons: 90.91%(mmu) 90.91%(rno)	3' GUCUGAGGCCACCUUACUUCCU 5' hsa-mir-205 __ ||||..|:|.|||||.|.|||: __ 5' CAGAGCCUGUUGGAAAGCAGGG 3' ENST00000303569 E:-19.940001 S:100.000000 Loc:251 Cons: %(mmu) 90.91%(rno)	3' UGCCUUCCCGUCUCUCCCGGUC 5' rno-mir-328 __ :.||||....||:|||||||.. __ 5' GGGGAACUCAAGGGAGGGCCUA 3' ENST00000303569 E:-25.9 S:97.000000 Loc:196 Cons: 95.45%(mmu) %(rno)
ENST00000245932_P	ENSG00000125753	VASP	1		ENSMUSG00000030403	ENSRNOG00000016367	VASODILATOR-STIMULATED PHOSPHOPROTEIN (VASP). [Source:SWISSPROT;Acc:P50552] ENSG00000125753 (1) (50712759 50712759 50721275 50721275 50863343) 4001 (4001 nt) HUGO:12652: [IPR002965:Proline-rich extensin; IPR001960:WH1; IPR000694:Proline-rich region; IPR000697:EVH1;]	3	-70.62	307	ENSMUSG00000030403 (mmu-miR-125b)	ENSRNOG00000016367 (mmu-miR-34a)	hsa-mir-125b hsa-mir-188 hsa-mir-34a	hsa-mir-125b hsa-mir-188 hsa-mir-34a	0003779 actin binding IEA; 0006928 cell motility NR; 0015629 actin cytoskeleton TAS;	3' AGUGUUCAAUCCCAGAGUCCCU 5' hsa-mir-125b __ .:|:|..||.||||:|::|||: __ 5' AUAUAUAUUUGGGUUUUGGGGG 3' ENST00000245932_P E:-21.24 S:106.000000 Loc:389 Cons: 90.91%(mmu) %(rno)	3' UGGGAGGUGGUACGUUCCCUAC 5' hsa-mir-188 __ :||..:|.|:.|||.:|||||| __ 5' GCCGGUCCCUCUGCUGGGGAUG 3' ENST00000245932_P E:-24.27 S:102.000000 Loc:248 Cons: 90.91%(mmu) %(rno)	3' UGUUGGUCGAUUCUGUGACGGU 5' hsa-mir-34a __ .||:||||.|::.|||||||.: __ 5' CCAGCCAG-UGGUACACUGCAG 3' ENST00000245932_P E:-25.110001 S:99.000000 Loc:3265 Cons: %(mmu) 95.24%(rno)
ENST00000319240	ENSG00000114867	EIF4G1	1		ENSMUSG00000045983	ENSRNOG00000001738	EUKARYOTIC TRANSLATION INITIATION FACTOR 4 GAMMA (EIF-4-GAMMA) (EIF- 4G) (EIF4G) (P220). [Source:SWISSPROT;Acc:Q04637] ENSG00000114867 (1) (185353307 185359382 185373582 185374052 185374635) 470 (470 HUGO:3296:EIF4F EIF4G [IPR002965:Proline-rich extensin; IPR003307:eIF4-gamma/eIF5/eIF2-epsilon; IPR003891:Initiation factor eIF-4 gamma, MA3; IPR003890:Initiation factor eIF-4 gamma, middle; IPR00069…	3	-72.17	305	ENSMUSG00000045983 (mmu-miR-196)		hsa-mir-196 rno-mir-20* mmu-mir-207 hsa-mir-214 hsa-mir-296 rno-mir-324_3p	hsa-mir-296 hsa-mir-214 hsa-mir-196	0003723 RNA binding IEA; 0003743 translation initiation factor activity IEA; 0006417 regulation of protein biosynthesis IEA; 0006446 regulation of translational initiation IEA; 0008304 eukaryotic translation initiation factor 4 complex TAS; 0006412 protein biosynthesis IEA;	3' UGUCCUAACUCCCCCCCGGGA 5' hsa-mir-296 __ :||||:...|||||||||.|. __ 5' GCAGGGGGAAGGGGGGGCACG 3' ENST00000319240 E:-33.02 S:104.000000 Loc:418 Cons: 95.24%(mmu) %(rno)	3' GACGGACAGACACGGACGACA 5' hsa-mir-214 __ .||.|.||..|||||||:.|| __ 5' GUGGCAGUGGGUGCCUGUAGU 3' ENST00000319240 E:-20.1 S:101.000000 Loc:117 Cons: 100.00%(mmu) %(rno)	3' GGUUGUUGUACUUUGAUGGAU 5' hsa-mir-196 __ ..:|:::|.||:::||:|||: __ 5' AGGAUGGCUUGGGGCUGCCUG 3' ENST00000319240 E:-19.049999 S:100.000000 Loc:175 Cons: 100.00%(mmu) %(rno)
ENST00000265315	ENSG00000072182	ACCN4	1		ENSMUSG00000033007	ENSRNOG00000019985	AMILORIDE-SENSITIVE CATION CHANNEL 4 ISOFORM 1; ACID-SENSING ION CHANNEL 4; BRAIN SODIUM CHANNEL 4. [Source:RefSeq;Acc:NM_018674] ENSG00000072182 (1) (220581591 220581605 220605307 220606025 220639494 HUGO:21263:ASIC4 BNAC4 [IPR001873:Na+ channel, amiloride-sensitive;]	3	-62.36	304	ENSMUSG00000033007 (mmu-miR-298)	ENSRNOG00000019985 (mmu-miR-29b)	hsa-mir-29b mmu-mir-298 rno-mir-349	rno-mir-349 hsa-mir-29b mmu-mir-298	0005272 sodium channel activity IEA; 0006814 sodium ion transport IEA; 0016020 membrane IEA;	3' UCUCCAAUUCUGUCGUCCCGAC 5' rno-mir-349 __ |||||.|::..|||||||.||| __ 5' AGAGGAUGGCCCAGCAGGCCUG 3' ENST00000265315 E:-26.809999 S:119.000000 Loc:520 Cons: %(mmu) 90.91%(rno)	3' UGACUAAAGUUUACCACGAU 5' hsa-mir-29b __ .|||||||:|.|..|||||: __ 5' UCUGAUUUUAUAAAGUGCUG 3' ENST00000265315 E:-18.51 S:93.000000 Loc:677 Cons: %(mmu) 90.00%(rno)	3' CCUUCUUGUCGGGAGGAGACGG 5' mmu-mir-298 __ .|.|.||.:|:|||:||.||:| __ 5' UGCACAAAGGUCCUUCU-UGUC 3' ENST00000265315 E:-17.040001 S:92.000000 Loc:159 Cons: 95.24%(mmu) 90.48%(rno)
ENST00000296042_P	ENSG00000163749		1		ENSMUSG00000050050	ENSRNOG00000002204	ENSG00000163749 (-1) (77692718 77692718 77737027 77737027 77593092) 4001 (4001 nt) []	3	-56.12	302	ENSMUSG00000050050 (mmu-miR-143)		hsa-mir-143 hsa-mir-195 hsa-mir-206	hsa-mir-143 hsa-mir-195 hsa-mir-206		3' ACUCGAUG-UCACGAAGUAGAGU 5' hsa-mir-143 __ ||:|.|::.||||:|.||||||. __ 5' UGGGAUGUAAGUGUUCCAUCUCC 3' ENST00000296042_P E:-19.98 S:108.000000 Loc:3354 Cons: 95.65%(mmu) %(rno)	3' CGGUUAUAAAGACACGACGAU 5' hsa-mir-195 __ .|||||.|..:||||.||:|| __ 5' CCCAAU-UAAUUGUGGUGUUA 3' ENST00000296042_P E:-17.889999 S:98.000000 Loc:38 Cons: 95.00%(mmu) %(rno)	3' GGUGUGUGAAGGAAUGUAAGGU 5' hsa-mir-206 __ |||.||||...|||.||.|||| __ 5' CCA-ACACAAACUUCCACUCCA 3' ENST00000296042_P E:-18.25 S:96.000000 Loc:3272 Cons: 95.24%(mmu) %(rno)
ENST00000318948_P	ENSG00000180530	NRIP1	1		ENSMUSG00000048490	ENSRNOG00000001585	NUCLEAR FACTOR RIP140 (NUCLEAR RECEPTOR INTERACTING PROTEIN 1). [Source:SWISSPROT;Acc:P48552] ENSG00000180530 (-1) (15258908 15258908 15262384 15262384 14877595) 4001 (4001 nt) HUGO:8001:RIP140 [IPR001687:ATP/GTP-binding site motif A (P-loop);]	3	-57.88	302		ENSRNOG00000001585 (mmu-miR-106b)	hsa-mir-106b hsa-mir-122a mmu-mir-133 hsa-mir-133a hsa-mir-200a	hsa-mir-106b mmu-mir-133 hsa-mir-200a	0003713 transcription co-activator activity TAS; 0006350 transcription TAS; 0006355 regulation of transcription, DNA-dependent IEA; 0005634 nucleus TAS;	3' UAGACGUGACAGUCGUGAAAU 5' hsa-mir-106b __ ||||.:|:|||||.||||.|| __ 5' AUCU-UAUUGUCAACACUAUA 3' ENST00000318948_P E:-17.35 S:109.000000 Loc:2081 Cons: %(mmu) 90.00%(rno)	3' UGUCGACCAACUUCCCCUGGUU 5' mmu-mir-133 __ |.|.:|||.||:||||||.:|| __ 5' AAAAUUGGGUGGAGGGGA-UAA 3' ENST00000318948_P E:-23.360001 S:100.000000 Loc:1270 Cons: %(mmu) 90.48%(rno)	3' UGUAGCAAUGGUCUGUCACAAU 5' hsa-mir-200a __ ..|.:.|.|:|||||||..||| __ 5' UAAAUAUAAUCAGACAGGUUUA 3' ENST00000318948_P E:-17.17 S:93.000000 Loc:2872 Cons: %(mmu) 100.00%(rno)
ENST00000263812	ENSG00000115840	SLC25A12	1		ENSMUSG00000027010	ENSRNOG00000022922	CALCIUM-BINDING MITOCHONDRIAL CARRIER PROTEIN ARALAR1 (SOLUTE CARRIER FAMILY 25, MEMBER 12). [Source:SWISSPROT;Acc:O75746] ENSG00000115840 (-1) (172843829 172844328 172927877 172953277 172576771) 499 HUGO:10982:Aralar [IPR002048:Calcium-binding EF-hand; IPR001993:Mitochondrial substrate carrier; IPR002067:Mitochondrial carrier protein; IPR002113:Adenine nucleotide translocator 1;]	3	-59.22	299	ENSMUSG00000027010 (mmu-miR-101b)	ENSRNOG00000022922 (mmu-miR-18)	rno-mir-101b hsa-mir-18 hsa-mir-sf202_seth	rno-mir-101b hsa-mir-sf202_seth hsa-mir-18	0005215 transporter activity IEA; 0005488 binding IEA; 0005509 calcium ion binding IEA; 0015294 solute:cation symporter activity TAS; 0006810 transport TAS; 0005739 mitochondrion TAS; 0005743 mitochondrial inner membrane IEA; 0005887 integral to plasma membrane TAS;	3' GAAGUCGAUAGUGUCAUGACAU 5' rno-mir-101b __ ..||||||:.||::||||||.. __ 5' AGUCAGCUG-CAUGGUACUGAC 3' ENST00000263812 E:-23.370001 S:107.000000 Loc:76 Cons: 95.24%(mmu) %(rno)	3' GCGGGAGAGUUGGGUCGAAAA 5' hsa-mir-sf202_seth __ .|:.:|||.:||:|.|||||. __ 5' AGUGUUCUAGACUCUGCUUUG 3' ENST00000263812 E:-17.65 S:98.000000 Loc:243 Cons: 90.48%(mmu) %(rno)	3' AUAGACGUGAUCUACGUGGAAU 5' hsa-mir-18 __ |.|:||:||.|||..||:|||: __ 5' UCUUUGUAC-AGAGACAUCUUG 3' ENST00000263812 E:-18.200001 S:94.000000 Loc:300 Cons: %(mmu) 95.24%(rno)
ENST00000233121	ENSG00000084764	MAPRE3	1		ENSMUSG00000029166	ENSRNOG00000008961	MICROTUBULE-ASSOCIATED PROTEIN RP/EB FAMILY MEMBER 3 (PROTEIN EB3). [Source:SWISSPROT;Acc:Q9UPY8] ENSG00000084764 (1) (27168060 27219622 27223751 27224621 27230381) 870 (870 nt) HUGO:6892:EB3 RP3 [IPR001715:Calponin-like actin-binding; IPR004953:EB1 protein;]	3	-63.99	299	ENSMUSG00000029166 (mmu-let-7b)	ENSRNOG00000008961 (mmu-let-7b)	hsa-let-7b hsa-let-7c hsa-mir-183 hsa-mir-184 rno-mir-342	hsa-mir-183 101 hsa-mir-184	0008017 microtubule binding IEA; 0007017 microtubule-based process IEA;	3' GUCACUUAAGAUGGUCACGGUAU 5' hsa-mir-183 __ .:|||..||.|::||||||::.| __ 5' GGGUGCUUUGUGUCAGUGCUGCA 3' ENST00000233121 E:-20.25 S:101.000000 Loc:94 Cons: 91.30%(mmu) %(rno)	3' UUGGUGUGUUGGAUGAUGGAGU 5' hsa-let-7b __ .|||||||||.||.||:|||.: __ 5' CACCACACAAACU-CUGCCUGG 3' ENST00000233121 E:-25.85 S:100.000000 Loc:720 Cons: 90.48%(mmu) 90.48%(rno)	3' UGGGAAUAGUCAAGAGGCAGGU 5' hsa-mir-184 __ ..|:|||.|.|||||::.|||| __ 5' CACUUUACCUGUUCUUU-UCCA 3' ENST00000233121 E:-17.889999 S:98.000000 Loc:378 Cons: 100.00%(mmu) 100.00%(rno)
ENST00000258963	ENSG00000136451	ZNF161	1		ENSMUSG00000018377	ENSRNOG00000009819	ZINC FINGER PROTEIN 161 (PUTATIVE TRANSCRIPTION FACTOR DB1). [Source:SWISSPROT;Acc:Q14119] ENSG00000136451 (-1) (56525758 56526472 56540110 56540151 56437564) 714 (714 nt) HUGO:12949:DB1 [IPR007087:Zn-finger, C2H2 type;]	3	-56.89	298	ENSMUSG00000018377 (mmu-miR-189)	ENSRNOG00000009819 (mmu-miR-190)	hsa-mir-189 hsa-mir-190 hsa-mir-26a hsa-mir-299 hsa-mir-34b	hsa-mir-190 hsa-mir-34b hsa-mir-26a	0003677 DNA binding IEA; 0003704 specific RNA polymerase II transcription factor activity TAS; 0006357 regulation of transcription from Pol II promoter TAS; 0006968 cellular defense response TAS; 0005634 nucleus IEA;	3' UGGAUUAUAUAGUUU-GUAUAGU 5' hsa-mir-190 __ .:||:||||:.||||.|||||.| __ 5' CUCUGAUAUG-CAAAGCAUAUGA 3' ENST00000258963 E:-17.629999 S:106.000000 Loc:579 Cons: 95.45%(mmu) 95.45%(rno)	3' GUUAGUCGAUUACUGUGACGGA 5' hsa-mir-34b __ |..|:||||:|..|||:|||:| __ 5' CUUUUAGCUGACAACAUUGCUU 3' ENST00000258963 E:-19.98 S:100.000000 Loc:219 Cons: 90.91%(mmu) 90.91%(rno)	3' UCGGAUAG-GACCUAAUGAACUU 5' hsa-mir-26a __ |.|:||||.|||||..||||.|: __ 5' AACUUAUCACUGGACCACUUUAG 3' ENST00000258963 E:-19.280001 S:92.000000 Loc:178 Cons: 95.65%(mmu) %(rno)
ENST00000246912	ENSG00000108788	TCFL4	1		ENSMUSG00000017801	ENSRNOG00000019983	TRANSCRIPTION FACTOR-LIKE PROTEIN 4 (MAX-LIKE BHLHZIP PROTEIN) (BIGMAX PROTEIN) (MLX). [Source:SWISSPROT;Acc:Q9UH92] ENSG00000108788 (1) (41092255 41092308 41096786 41098422 41134856) 1636 (1636 nt) HUGO:11645:MAD7 MLX MXD7 [IPR001092:Basic helix-loop-helix dimerization domain bHLH;]	3	-63.12	298	ENSMUSG00000017801 (rno-miR-140*)	ENSRNOG00000019983 (mmu-miR-185)	rno-mir-140* hsa-mir-185 hsa-mir-29b hsa-mir-29c mmu-mir-291_5p mmu-mir-298 hsa-mir-99b	mmu-mir-298 hsa-mir-29c hsa-mir-185	0003700 transcription factor activity NAS; 0006355 regulation of transcription, DNA-dependent NAS; 0005634 nucleus IDA; 0005737 cytoplasm IDA;	3' CCUUCUUGUCGGGAGGAGACGG 5' mmu-mir-298 __ ||||..||.|:::|||||||:: __ 5' GGAA--ACUGUUUUCCUCUGUU 3' ENST00000246912 E:-23.360001 S:110.000000 Loc:354 Cons: %(mmu) 90.00%(rno)	3' AUUGGCUAAAG-UUUACCACGAU 5' hsa-mir-29c __ .|:|:|:||||.|..|||||:|. __ 5' CAGCUGGUUUCUACUUGGUGUUU 3' ENST00000246912 E:-22.24 S:95.000000 Loc:107 Cons: 95.65%(mmu) 95.65%(rno)	3' CUUGACG--GAAAGAGAGGU 5' hsa-mir-185 __ |||||||..|||.||||:.: __ 5' GAACUGCUUCUUGCUCUUGG 3' ENST00000246912 E:-17.52 S:93.000000 Loc:1506 Cons: %(mmu) 90.00%(rno)
ENST00000325215_P	ENSG00000168488		1		ENSMUSG00000032637	ENSRNOG00000018686	ATAXIN 2 RELATED PROTEIN ISOFORM A; ATAXIN-2 DOMAIN PROTEIN. [Source:RefSeq;Acc:NM_007245] ENSG00000168488 (1) (28872046 28872046 28884651 28884651 28895721) 4001 (4001 nt) [IPR002965:Proline-rich extensin; IPR001230:Prenyl group binding site (CAAX box);]	3	-65.77	296	ENSMUSG00000032637 (mmu-miR-30a)	ENSRNOG00000018686 (rno-miR-339)	hsa-mir-30a rno-mir-336 rno-mir-339 rno-mir-342	rno-mir-342 rno-mir-339 hsa-mir-30a	0005554 molecular_function unknown ND; 0000004 biological_process unknown ND; 0008372 cellular_component unknown ND;	3' CUGCCCACGCUAAAGACACACUCU 5' rno-mir-342 __ .||..|.|:||...|||||||||| __ 5' AACUUGAGUGA--CCUGUGUGAGA 3' ENST00000325215_P E:-22.6 S:107.000000 Loc:1490 Cons: 90.91%(mmu) 95.45%(rno)	3' ACUC--GAGGACCUCCUGUCCCU 5' rno-mir-339 __ ||||..||||..|||.:.||||| __ 5' UGAGACCUCCAUGAGUGGAGGGA 3' ENST00000325215_P E:-23.219999 S:96.000000 Loc:1176 Cons: 91.30%(mmu) 91.30%(rno)	3' CGAC-GUUUGU-AGGCUGACUUUC 5' hsa-mir-30a __ .|||.|||:||..::||.||::|| __ 5' CCUGCCAAGCACCUUGAAUGGGAG 3' ENST00000325215_P E:-19.950001 S:93.000000 Loc:1283 Cons: 91.67%(mmu) %(rno)
ENST00000282343_P	ENSG00000165995	CACNB2	1		ENSMUSG00000037830	ENSRNOG00000018378	DIHYDROPYRIDINE-SENSITIVE L-TYPE, CALCIUM CHANNEL BETA-2 SUBUNIT (CAB2) (VOLTAGE-DEPENDENT CALCIUM CHANNEL BETA-2 SUBUNIT) (LAMBERT- EATON MYASTHENIC SYNDROME ANTIGEN B) (MYSB). [Source:SWISSPROT;Acc: HUGO:1402:CACNLB2 MYSB [IPR001452:SH3 domain; IPR000584:Dihydropyridine sensitive L-type calcium channel, beta subunit;]	3	-56.27	295	ENSMUSG00000037830 (mmu-miR-30d)	ENSRNOG00000018378 (mmu-miR-154)	hsa-mir-154 hsa-mir-30d mmu-mir-300	hsa-mir-30d hsa-mir-154 mmu-mir-300	0005245 voltage-gated calcium channel activity TAS; 0006811 ion transport IEA; 0006816 calcium ion transport NAS; 0007528 neuromuscular junction development TAS; 0005624 membrane fraction NR; 0005891 voltage-gated calcium channel complex TAS;	3' GAAGGUCAGCCCCUACAAAUGU 5' hsa-mir-30d __ .||::|||..|..||||||||| __ 5' GUUUUAGUAAGAAAUGUUUACA 3' ENST00000282343_P E:-17.059999 S:106.000000 Loc:1315 Cons: 100.00%(mmu) 100.00%(rno)	3' GCUUCCGUUGUG-CCUAUUGGAU 5' hsa-mir-154 __ :.|:|||||.|:.||:|:||:|: __ 5' UCAGGGCAAAAUGGGGUGACUUG 3' ENST00000282343_P E:-22.200001 S:98.000000 Loc:1538 Cons: %(mmu) 91.30%(rno)	3' CUUCUCUCGAACGGGAACGUAU 5' mmu-mir-300 __ ..|.||||||.||::.||||.. __ 5' AUAAAGAGCUGGCUUCUGCACU 3' ENST00000282343_P E:-17.01 S:91.000000 Loc:3398 Cons: %(mmu) 100.00%(rno)
ENST00000225648	ENSG00000108511	HOXB6	1		ENSMUSG00000000690	ENSRNOG00000007823	HOMEOBOX PROTEIN HOX-B6 (HOX-2B) (HOX-2.2) (HU-2). [Source:SWISSPROT;Acc:P17509] ENSG00000108511 (-1) (47147752 47148413 47150150 47156972 47145757) 661 (661 nt) HUGO:5117:HOX2 HOX2B [IPR001356:Homeobox; IPR001827:Homeobox protein, antennapedia type;]	3	-65.05	294	ENSMUSG00000000690 (mmu-miR-199a*)	ENSRNOG00000007823 (mmu-miR-149)	hsa-mir-149 hsa-mir-198 hsa-mir-199a* hsa-mir-31 rno-mir-325 rno-mir-330	hsa-mir-198 hsa-mir-199a* rno-mir-325	0003700 transcription factor activity NAS; 0006355 regulation of transcription, DNA-dependent NAS; 0007275 development IEA; 0008595 determination of anterior/posterior axis, embryo NAS; 0005634 nucleus NAS;	3' GGAUAGAGGGGAGACCUGG 5' hsa-mir-198 __ |:|:|||:..||||||||. __ 5' CUUGUCUUAGCUCUGGACG 3' ENST00000225648 E:-24.49 S:99.000000 Loc:551 Cons: %(mmu) 100.00%(rno)	3' UUGGUUACACGUCUGA-UGACAU 5' hsa-mir-199a* __ :.:|||||.|:|||:|.:||||. __ 5' GUUCAAUG-GUAGAUUCGCUGUC 3' ENST00000225648 E:-20.6 S:98.000000 Loc:366 Cons: 95.45%(mmu) 95.45%(rno)	3' UGUGA-AUGACUCGUGGAUGAUCC 5' rno-mir-325 __ .||||..|..||||||.|||||.. __ 5' CCACUGGAAGGAGCACAUACUACC 3' ENST00000225648 E:-19.959999 S:97.000000 Loc:454 Cons: 95.83%(mmu) 95.83%(rno)
ENST00000336984_P	ENSG00000168448	AGPAT1	1		ENSMUSG00000034254	ENSRNOG00000000437	1-ACYL-SN-GLYCEROL-3-PHOSPHATE ACYLTRANSFERASE ALPHA (EC 2.3.1.51) (1- AGP ACYLTRANSFERASE 1) (1-AGPAT 1) (LYSOPHOSPHATIDIC ACID ACYLTRANSFERASE-ALPHA) (LPAAT-ALPHA) (1-ACYLGLYCEROL-3-PHOSPHATE O- ACY HUGO:324:LPAAT-alpha [IPR002123:Phospholipid/glycerol acyltransferase;]	3	-69.46	294	ENSMUSG00000034254 (mmu-miR-210)	ENSRNOG00000000437 (mmu-miR-27b)	hsa-mir-210 hsa-mir-27b rno-mir-328 hsa-mir-93	hsa-mir-27b hsa-mir-210 rno-mir-328	0003841 1-acylglycerol-3-phosphate O-acyltransferase activity IEA; 0004469 lysophosphatidate acyltransferase activity TAS; 0016740 transferase activity IEA; 0006654 phosphatidic acid biosynthesis TAS; 0008152 metabolism IEA; 0008654 phospholipid biosynthesis IEA; 0005783 endoplasmic reticulum TAS; 0016021 integral to membrane IEA;	3' GUCUUGAAUCGGUGACACUU 5' hsa-mir-27b __ |||.||.|:|:|:|||.||: __ 5' CAGCACCUGGUCGCUGAGAG 3' ENST00000336984_P E:-19.59 S:102.000000 Loc:1643 Cons: 95.00%(mmu) 90.00%(rno)	3' GUCGGCGACAGUGUGCGUGUC 5' hsa-mir-210 __ ||||||..|.|:|||.|:||. __ 5' CAGCCGGGGGCGCACUCGCAC 3' ENST00000336984_P E:-27.870001 S:98.000000 Loc:2292 Cons: 90.48%(mmu) %(rno)	3' UGCCUUCCCGUCUCUCCCGGUC 5' rno-mir-328 __ :|..||||.|||:.|||||:.| __ 5' GCACAAGGUCAGGUAGGGCUUG 3' ENST00000336984_P E:-22 S:94.000000 Loc:2683 Cons: 90.91%(mmu) %(rno)
ENST00000295926	ENSG00000163660	CCNL1	1		ENSMUSG00000027829	ENSRNOG00000011586	CYCLIN L1; CYCLIN L ANIA-6A. [Source:RefSeq;Acc:NM_020307] ENSG00000163660 (-1) (158186500 158186943 158198796 158198849 157849435) 443 (443 nt) HUGO:20569:ania-6a [IPR004827:Basic-leucine zipper (bZIP) transcription factor; IPR006671:Cyclin, N-terminal domain;]	3	-54.49	292	ENSMUSG00000027829 (mmu-miR-18)	ENSRNOG00000011586 (mmu-miR-18)	hsa-mir-18 hsa-mir-199a* rno-mir-340 hsa-mir-sf202_seth	hsa-mir-18 hsa-mir-199a* hsa-mir-sf202_seth	0003677 DNA binding IEA; 0000910 cytokinesis IEA; 0006355 regulation of transcription, DNA-dependent IEA; 0007049 cell cycle IEA; 0005634 nucleus IEA;	3' AUAGACGUGAUCUACGUGGAAU 5' hsa-mir-18 __ ..||||:|..|.|||:|:|||| __ 5' AUUCUGUA-AAAAUGUAUCUUA 3' ENST00000295926 E:-17.799999 S:103.000000 Loc:282 Cons: 100.00%(mmu) 100.00%(rno)	3' UUGGUUACACGUCUGA--UGACAU 5' hsa-mir-199a* __ ||||.|||..|||::|..|:|||| __ 5' AACC-AUGGUCAGGUUCAAUUGUA 3' ENST00000295926 E:-17.6 S:98.000000 Loc:209 Cons: 91.30%(mmu) %(rno)	3' GCGGGAGAGUUG-GGUCGAAAA 5' hsa-mir-sf202_seth __ :.|::|||:|||.|::|:||.| __ 5' UACUUUCUUAACACUGGUUUGU 3' ENST00000295926 E:-19.09 S:91.000000 Loc:369 Cons: %(mmu) 95.45%(rno)
ENST00000331320	ENSG00000182979	MTA1	1		ENSMUSG00000021144	ENSRNOG00000004711	METASTASIS-ASSOCIATED PROTEIN MTA1. [Source:SWISSPROT;Acc:Q13330] ENSG00000182979 (1) (103876657 103876657 103908228 103908735 103912808) 507 (507 nt) HUGO:7410: [IPR001005:Myb DNA-binding domain; IPR000679:Zn-finger, GATA type; IPR001025:Bromo adjacent region; IPR000949:ELM2 domain;]	3	-66.2	286	ENSMUSG00000021144 (mmu-miR-148b)	ENSRNOG00000004711 (rno-miR-148b)	rno-mir-148b hsa-mir-148 mmu-mir-148a hsa-mir-210 hsa-mir-362	hsa-mir-148 hsa-mir-362 hsa-mir-210	0003700 transcription factor activity IEA; 0006355 regulation of transcription, DNA-dependent IEA; 0007165 signal transduction TAS; 0005634 nucleus IEA;	3' UGUUUCAAGACAUCACGUGACU 5' hsa-mir-148 __ .:||:|||:|||.|||:.|||. __ 5' CUAAGGUUUUGUUGUGUUCUGU 3' ENST00000331320 E:-20.790001 S:103.000000 Loc:294 Cons: 100.00%(mmu) 100.00%(rno)	3' GAGUGUGGAUCCAAGGUUCCUAA 5' hsa-mir-362 __ ||:||||||:|..|.:.|||||. __ 5' CUUACACCUGGAAUGUUAGGAUC 3' ENST00000331320 E:-22.92 S:92.000000 Loc:378 Cons: %(mmu) 95.65%(rno)	3' GUCGGCGACAGUGUGCGUGUC 5' hsa-mir-210 __ |..||||..||||.:|||.|| __ 5' CUCCCGCCCUCACCUGCAGAG 3' ENST00000331320 E:-22.49 S:91.000000 Loc:102 Cons: 95.24%(mmu) 95.24%(rno)
ENST00000262455_P	ENSG00000023318	TXNDC4	1		ENSMUSG00000028343	ENSRNOG00000005841	THIOREDOXIN DOMAIN CONTAINING PROTEIN 4 PRECURSOR (ENDOPLASMIC RETICULUM PROTEIN ERP44). [Source:SWISSPROT;Acc:Q9BS26] ENSG00000023318 (-1) (98124732 98124732 98240960 98240960 97364015) 4001 (4001 nt HUGO:18311:ERP44 KIAA0573 [IPR000886:Endoplasmic reticulum targeting sequence; IPR006662:Thioredoxin type domain; IPR006663:Thioredoxin domain 2;]	3	-56.64	284		ENSRNOG00000005841 (mmu-miR-188)	hsa-mir-188 rno-mir-331 hsa-mir-96	hsa-mir-96 rno-mir-331 hsa-mir-188	0003754 chaperone activity IEA; 0005489 electron transporter activity IEA; 0006118 electron transport IEA; 0005783 endoplasmic reticulum IEA;	3' CGUUUUUACACGAUCACGGUUU 5' hsa-mir-96 __ .||::||.|..|.|||||||:| __ 5' UCAGGAA-G-CCCAGUGCCAGA 3' ENST00000262455_P E:-17.93 S:98.000000 Loc:1074 Cons: %(mmu) 95.00%(rno)	3' AAGAUCCUAUCCGGGUCCCCG 5' rno-mir-331 __ |..|:..|||||||.||||.| __ 5' UGGUGCUAUAGGCCAAGGGUC 3' ENST00000262455_P E:-19.48 S:94.000000 Loc:1138 Cons: %(mmu) 100.00%(rno)	3' UGGGAGGUGGUACGUUCCCUAC 5' hsa-mir-188 __ :.||||.|:..|||.|||||.. __ 5' GGCCUCAAUACUGCCAGGGAAU 3' ENST00000262455_P E:-19.23 S:92.000000 Loc:1021 Cons: %(mmu) 90.91%(rno)
ENST00000309318	ENSG00000173457	PPP1R14B	1		ENSMUSG00000056612	ENSRNOG00000021151	PROTEIN PHOSPHATASE 1, REGULATORY (INHIBITOR) SUBUNIT 14B; PHOSPHOLIPASE C, BETA-3, NEIGHBORING GENE OF. [Source:RefSeq;Acc:NM_138689] ENSG00000173457 (-1) (63787317 63787586 63789505 63789630 6377368 HUGO:9057:PLCB3N PNG SOM172 [IPR008025:PKC-activated phosphatase-1 inhibitor; IPR001472:Bipartite nuclear localization signal;]	3	-61.72	283	ENSMUSG00000056612 (mmu-miR-222)	ENSRNOG00000021151 (mmu-miR-222)	hsa-mir-222 hsa-mir-296 hsa-mir-30d hsa-mir-34a	hsa-mir-296 hsa-mir-34a hsa-mir-30d		3' UGUCCUAACUCCCCCCCGGGA 5' hsa-mir-296 __ ||||.|.|...|||||.|||| __ 5' ACAGCAAUACCGGGGGACCCU 3' ENST00000309318 E:-22.190001 S:96.000000 Loc:64 Cons: 100.00%(mmu) 95.24%(rno)	3' UGUUGGUCGAUUCUGUGACGGU 5' hsa-mir-34a __ |:||..|||||:||:||.|||. __ 5' AUAA--AGCUAGGAUAC-GCCU 3' ENST00000309318 E:-21.52 S:94.000000 Loc:243 Cons: 100.00%(mmu) 100.00%(rno)	3' GAAGGU--CAGCCCCUACAAAUGU 5' hsa-mir-30d __ :|||||...|:||||.|.||||:. __ 5' UUUCCACUUUUGGGGUUUUUUAUU 3' ENST00000309318 E:-18.01 S:93.000000 Loc:159 Cons: 91.67%(mmu) %(rno)
ENST00000313173	ENSG00000175879	HOXD8	1		ENSMUSG00000027102	ENSRNOG00000001578	HOMEOBOX PROTEIN HOX-D8 (HOX-4E) (HOX-5.4). [Source:SWISSPROT;Acc:P13378] ENSG00000175879 (1) (177197021 177197639 177198884 177199272 177218658) 388 (388 nt) HUGO:5139:HOX4 HOX4E [IPR001356:Homeobox; IPR001827:Homeobox protein, antennapedia type; IPR000694:Proline-rich region;]	2	-41.4	228	ENSMUSG00000027102 (mmu-miR-143)		hsa-mir-143 hsa-mir-196 hsa-mir-203	hsa-mir-203 hsa-mir-196	0003700 transcription factor activity NAS; 0006355 regulation of transcription, DNA-dependent NAS; 0007275 development IEA; 0008595 determination of anterior/posterior axis, embryo NAS; 0005634 nucleus NAS;	3' GAUCACCAGGAUUUGUAAAGUG 5' hsa-mir-203 __ |.||||..|:|:|||||||:|. __ 5' CAAGUGCACUUGAACAUUUUAA 3' ENST00000313173 E:-18.309999 S:116.000000 Loc:350 Cons: 95.45%(mmu) %(rno)	3' GGUUGUUGUACUUUGAUGGAU 5' hsa-mir-196 __ :|||||||:|.|||||.|||| __ 5' UCAACAACGU-AAACUUCCUA 3' ENST00000313173 E:-23.09 S:112.000000 Loc:284 Cons: 95.00%(mmu) %(rno)
ENST00000258886	ENSG00000136381	IREB2	1		ENSMUSG00000032293	ENSRNOG00000013271	IRON-RESPONSIVE ELEMENT BINDING PROTEIN 2 (IRE-BP 2) (IRON REGULATORY PROTEIN 2) (IRP2). [Source:SWISSPROT;Acc:P48200] ENSG00000136381 (1) (76447952 76447952 76506304 76506805 76545843) 501 (501 nt) HUGO:6115:IRP2 [IPR001030:Aconitate hydratase, N-terminal; IPR000573:Aconitate hydratase, C-terminal;]	2	-37.26	226	ENSMUSG00000032293 (hsa-miR-220)	ENSRNOG00000013271 (hsa-miR-220)	hsa-mir-220 hsa-mir-29b hsa-mir-29c rno-mir-350	hsa-mir-29c hsa-mir-220	0003723 RNA binding IDA; 0016836 hydro-lyase activity IEA; 0008152 metabolism IEA; 0016478 negative regulation of translation ISS; 0005737 cytoplasm NAS;	3' AUUGGCUA-AAGUUUACCACGAU 5' hsa-mir-29c __ |||.:.||.|.|:|||||||||| __ 5' UAAAUAAUAUACGAAUGGUGCUA 3' ENST00000258886 E:-20.129999 S:124.000000 Loc:172 Cons: 91.30%(mmu) 95.65%(rno)	3' UUUCACAGUCUAUGCCACACC 5' hsa-mir-220 __ ||.||||.|.:|::|.||||| __ 5' AACGUGUGAAGUGUGUUGUGG 3' ENST00000258886 E:-17.129999 S:102.000000 Loc:212 Cons: 100.00%(mmu) 100.00%(rno)
ENST00000234725	ENSG00000058804		1		ENSMUSG00000028614	ENSRNOG00000010620	ENSG00000058804 (-1) (53601066 53603561 53673852 53673852 53569796) 1902 (1902 nt) []	2	-42.45	225	ENSMUSG00000028614 (mmu-miR-101b)		rno-mir-101b rno-mir-325	rno-mir-101b rno-mir-325		3' GAAGUCGAUAGUGUCAUGACAU 5' rno-mir-101b __ :|..||:.|.|||||||||||| __ 5' UUAAAGUCAGCACAGUACUGUA 3' ENST00000234725 E:-23.59 S:127.000000 Loc:1216 Cons: 95.45%(mmu) %(rno)	3' UGUGAAUGACUCGUGGAUGAUCC 5' rno-mir-325 __ |||:.|.:||...|:||::|||| __ 5' ACAUAUUUUGUUAAUCUGUUAGG 3' ENST00000234725 E:-18.860001 S:98.000000 Loc:506 Cons: 100.00%(mmu) %(rno)
ENST00000295598	ENSG00000163399	ATP1A1	1		ENSMUSG00000033161	ENSRNOG00000016019	SODIUM/POTASSIUM-TRANSPORTING ATPASE ALPHA-1 CHAIN PRECURSOR (EC 3.6.3.9) (SODIUM PUMP 1) (NA+/K+ ATPASE 1). [Source:SWISSPROT;Acc:P05023] ENSG00000163399 (1) (116262257 116273017 116293447 116293775 HUGO:799: [IPR001757:ATPase, E1-E2 type; IPR006069:Cation transporting ATPase; IPR008250:E1-E2 ATPase-associated region; IPR006068:Cation transporting ATPase, C-terminal; IPR004014:Cation transportin…	2	-56.2	221	ENSMUSG00000033161 (mmu-miR-205)	ENSRNOG00000016019 (mmu-miR-205)	hsa-mir-205 rno-mir-328	hsa-mir-205 rno-mir-328	0000287 magnesium ion binding IEA; 0005391 sodium/potassium-exchanging ATPase activity TAS; 0005524 ATP binding IEA; 0015077 monovalent inorganic cation transporter activity IEA; 0016787 hydrolase activity IEA; 0006813 potassium ion transport IEA; 0006814 sodium ion transport IEA; 0008152 metabolism IEA; 0005624 membrane fraction TAS; 0005890 sodium/potassium-exchanging ATPase complex TAS; 001602…	3' GUCUGAGGCCACCUUACUUCCU 5' hsa-mir-205 __ .||||.:|..||||||||||.| __ 5' AAGACGUC-CUGGAAUGAAGCA 3' ENST00000295598 E:-22.780001 S:112.000000 Loc:133 Cons: 95.24%(mmu) 95.24%(rno)	3' UGCCUUCC-CGUCUCUCCCGGUC 5' rno-mir-328 __ |:||::||.|.:|:||||||::. __ 5' AUGGGGGGAGGGGGGAGGGCUGC 3' ENST00000295598 E:-33.419998 S:109.000000 Loc:162 Cons: %(mmu) 95.65%(rno)
ENST00000331010	ENSG00000185652	NTF3	1		ENSMUSG00000049107	ENSRNOG00000019716	NEUROTROPHIN-3 PRECURSOR (NT-3) (NEUROTROPHIC FACTOR) (HDNF) (NERVE GROWTH FACTOR 2) (NGF-2). [Source:SWISSPROT;Acc:P20783] ENSG00000185652 (1) (5473527 5473642 5474415 5474586 6179817) 171 (171 nt) HUGO:8023: [IPR002072:Nerve growth factor;]	2	-36.71	219	ENSMUSG00000049107 (mmu-let-7b)	ENSRNOG00000019716 (mmu-let-7b)	hsa-let-7b hsa-let-7c hsa-let-7e	109	0008083 growth factor activity IEA; 0006916 anti-apoptosis NR; 0006928 cell motility NR; 0007165 signal transduction TAS; 0007267 cell-cell signaling TAS; 0007399 neurogenesis TAS;	3' UUGGUAUGUUGGAUGAUGGAGU 5' hsa-let-7c __ ...:|||:||.:||:|||:|:| __ 5' CCAUAUAUAAAUUAUUACUUUA 3' ENST00000331010 E:-18.65 S:112.000000 Loc:17 Cons: 95.45%(mmu) 95.45%(rno)	3' UGAUAUGUUGGAGGAUGGAGU 5' hsa-let-7e __ |.||||:||.||::|.:|||| __ 5' AGUAUAUAAGCUUUUUUCUCA 3' ENST00000331010 E:-18.059999 S:107.000000 Loc:127 Cons: 100.00%(mmu) %(rno)
ENST00000259034	ENSG00000136518		1		ENSMUSG00000027671	ENSRNOG00000011553	53 KDA BRG1-ASSOCIATED FACTOR A (ACTIN-RELATED PROTEIN BAF53A) (ARPNBETA). [Source:SWISSPROT;Acc:O96019] ENSG00000136518 (1) (180601621 180601794 180626711 180627101 180643489) 390 (390 nt) [IPR001969:Eukaryotic/viral aspartic protease, active site; IPR004001:Actin; IPR004000:Actin/actin-like;]	2	-41.24	218	ENSMUSG00000027671 (mmu-miR-132)	ENSRNOG00000011553 (mmu-let-7a)	hsa-let-7a hsa-let-7g hsa-mir-132 mmu-mir-202	hsa-mir-132	0003682 chromatin binding TAS; 0003774 motor activity IEA; 0005200 structural constituent of cytoskeleton IEA; 0006338 chromatin modeling TAS; 0007165 signal transduction TAS; 0009613 response to pest/pathogen/parasite TAS; 0005634 nucleus IEA; 0005884 actin filament IEA;	3' UGA-CAUGUUUGAUGAUGGAGU 5' hsa-let-7g __ |||.|||.||::||||:|||.. __ 5' ACUAGUAAAAGUUACUGCCUAU 3' ENST00000259034 E:-19.190001 S:109.000000 Loc:320 Cons: %(mmu) 95.45%(rno)	3' GCUGGUA-CCGACAUCUGACAAU 5' hsa-mir-132 __ :||||||...:||||||.||||. __ 5' UGACCAUCUUUUGUAGAAUGUUU 3' ENST00000259034 E:-22.049999 S:109.000000 Loc:73 Cons: 95.65%(mmu) 95.65%(rno)
ENST00000274289	ENSG00000145632		1		ENSMUSG00000021701	ENSRNOG00000011951	SERINE/THREONINE-PROTEIN KINASE SNK (EC 2.7.1.-) (SERUM INDUCIBLE KINASE). [Source:SWISSPROT;Acc:Q9NYY3] ENSG00000145632 (-1) (57765699 57766295 57771671 57771972 56794420) 596 (596 nt) [IPR000719:Protein kinase; IPR002290:Serine/Threonine protein kinase; IPR000959:POLO box duplicated region;]	2	-46.73	216	ENSMUSG00000021701 (mmu-miR-10a)	ENSRNOG00000011951 (mmu-miR-27b)	hsa-mir-10a hsa-mir-27b hsa-mir-30a rno-mir-339	hsa-mir-10a hsa-mir-27b	0004674 protein serine/threonine kinase activity IEA; 0005524 ATP binding IEA; 0016740 transferase activity IEA; 0006468 protein amino acid phosphorylation IEA; 0007049 cell cycle IEA;	3' GUGUUUAAGC-CUAGAUGUCCCAU 5' hsa-mir-10a __ :.|.|.|.:|.|||||||||||.| __ 5' UUCCACUGUGAGAUCUACAGGGAA 3' ENST00000274289 E:-25.309999 S:109.000000 Loc:37 Cons: 91.67%(mmu) %(rno)	3' GUCUUGAAUCGGUGACACUU 5' hsa-mir-27b __ .||:||||.|..|||||||| __ 5' GAGGACUUUGGAACUGUGAA 3' ENST00000274289 E:-21.42 S:107.000000 Loc:308 Cons: 90.00%(mmu) 90.00%(rno)
ENST00000309644	ENSG00000148835	TAF5	1		ENSMUSG00000025049	ENSRNOG00000020274	TRANSCRIPTION INITIATION FACTOR TFIID 100 KDA SUBUNIT (TAFII-100) (TAFII100). [Source:SWISSPROT;Acc:Q15542] ENSG00000148835 (1) (104792319 104792334 104812567 104813402 104821047) 835 (835 nt) HUGO:11539:TAF2D TAFII100 [IPR001680:G-protein beta WD-40 repeat; IPR007582:WD40 associated region in TFIID subunit;]	2	-39.5	215	ENSMUSG00000025049 (mmu-miR-31)	ENSRNOG00000020274 (mmu-miR-24)	hsa-mir-24 hsa-mir-31 hsa-mir-34a	hsa-mir-34a hsa-mir-24	0003700 transcription factor activity TAS; 0006355 regulation of transcription, DNA-dependent IEA; 0005634 nucleus IEA; 0005669 transcription factor TFIID complex TAS;	3' UGUUGGUC-GAUUCUGUGACGGU 5' hsa-mir-34a __ |.|.::||.|.|||.|||||||| __ 5' AGAUUUAGACCAAGUCACUGCCA 3' ENST00000309644 E:-20.469999 S:111.000000 Loc:735 Cons: 91.30%(mmu) 95.65%(rno)	3' GAC-AA-GGACGACUUGACUCGGU 5' hsa-mir-24 __ :||.||.|||.|.|.||||||||. __ 5' UUGCUUACCUCCAGUACUGAGCCU 3' ENST00000309644 E:-19.030001 S:104.000000 Loc:694 Cons: %(mmu) 91.67%(rno)
ENST00000335999	ENSG00000167566		1		ENSMUSG00000023009	ENSRNOG00000017033	ENSG00000167566 (-1) (48471196 48472418 48477051 48477052 48348599) 1222 (1222 nt) []	2	-42.71	215	ENSMUSG00000023009 (mmu-miR-107)	ENSRNOG00000017033 (mmu-miR-107)	hsa-mir-107 hsa-mir-185 hsa-mir-214 hsa-mir-29c hsa-mir-29b hsa-mir-29a	hsa-mir-29a hsa-mir-185		3' UUGGCUAAAG-UCUACCACGAUC 5' hsa-mir-29a __ ..|:|.|.||.:|||||||||:. __ 5' CCCUGCUGUCUGGAUGGUGCUGC 3' ENST00000335999 E:-21.889999 S:109.000000 Loc:1004 Cons: 91.30%(mmu) 91.30%(rno)	3' CUUGACGGAA-AGAGAGGU 5' hsa-mir-185 __ .|::||||||.||||||:: __ 5' AAGUUGCCUUCUCUCUCUG 3' ENST00000335999 E:-20.82 S:106.000000 Loc:974 Cons: %(mmu) 94.74%(rno)
ENST00000265363	ENSG00000111962	UST	1		ENSMUSG00000047712	ENSRNOG00000023581	URONYL-2-SULFOTRANSFERASE; DERMATAN/CHONDROITIN SULFATE 2-SULFOTRANSFERASE; URONYL 2-SULFOTRANSFERASE. [Source:RefSeq;Acc:NM_005715] ENSG00000111962 (1) (149049044 149049137 149375822 149378695 149644 HUGO:17223: [IPR007734:Heparan sulfate 2-O-sulfotransferase;]	2	-47.59	214	ENSMUSG00000047712 (mmu-miR-100)		hsa-mir-100 hsa-mir-125b hsa-mir-125a hsa-mir-146	hsa-mir-125b hsa-mir-146	0008146 sulfotransferase activity TAS; 0016740 transferase activity IEA; 0006477 protein amino acid sulfation TAS; 0016021 integral to membrane TAS;	3' AGUGUUCAAUCCCAGAGUCCCU 5' hsa-mir-125b __ .||||.|||:|||||.:.|||| __ 5' CCACAUGUUGGGGUCAUUGGGA 3' ENST00000265363 E:-28.639999 S:111.000000 Loc:120 Cons: 95.45%(mmu) %(rno)	3' UUGGGUACCUUAAGUCAA-GAGU 5' hsa-mir-146 __ |.:|||.||..||:||||.|||| __ 5' AUUCCAAGG-UUUUAGUUACUCA 3' ENST00000265363 E:-18.950001 S:103.000000 Loc:2622 Cons: 95.45%(mmu) %(rno)
ENST00000164133	ENSG00000068971	PPP2R5B	1		ENSMUSG00000024777	ENSRNOG00000021025	SERINE/THREONINE PROTEIN PHOSPHATASE 2A, 56 KDA REGULATORY SUBUNIT, BETA ISOFORM (PP2A, B SUBUNIT, B BETA ISOFORM) (PP2A, B SUBUNIT, B56 BETA ISOFORM) (PP2A, B SUBUNIT, PR61 BETA ISOFORM) (PP2A, B SUB HUGO:9310: [IPR002554:Protein phosphatase 2A, regulatory B subunit (B56 family);]	2	-56.02	213	ENSMUSG00000024777 (mmu-miR-298)	ENSRNOG00000021025 (rno-miR-343)	mmu-mir-298 rno-mir-343	rno-mir-343 mmu-mir-298	0008601 protein phosphatase type 2A, intrinsic regulator activity TAS; 0007165 signal transduction IEA; 0000159 protein phosphatase type 2A complex IEA; 0005737 cytoplasm TAS;	3' UGACCCGUGUGCCUCCCUCU 5' rno-mir-343 __ |:||||||.:.||||||:|| __ 5' AUUGGGCAGGGGGAGGGGGA 3' ENST00000164133 E:-34.790001 S:116.000000 Loc:497 Cons: 100.00%(mmu) 100.00%(rno)	3' CCUUCUUGUCGGGAGGAGACGG 5' mmu-mir-298 __ ..|:|:|:...|:|||.||||| __ 5' UCAGGGAU---CUUCCCCUGCC 3' ENST00000164133 E:-21.23 S:97.000000 Loc:246 Cons: 94.74%(mmu) %(rno)
ENST00000338052	ENSG00000136295		1		ENSMUSG00000036565	ENSRNOG00000024244	ENSG00000136295 (1) (2416023 2416023 2445711 2448772 2463502) 3061 (3061 nt) [IPR006990:Tweety;]	2	-37.22	212	ENSMUSG00000036565 (mmu-miR-30c)	ENSRNOG00000024244 (mmu-miR-122a)	hsa-mir-122a hsa-mir-30c hsa-mir-30b	hsa-mir-30b hsa-mir-122a		3' CGACUCACAUCCUACAAAUGU 5' hsa-mir-30b __ .:|.||||||.|||||||:|. __ 5' CUUUAGUGUACGAUGUUUGCU 3' ENST00000338052 E:-18.77 S:112.000000 Loc:1308 Cons: 90.48%(mmu) %(rno)	3' UGUUUGUGGUAACAGUGUGAGGU 5' hsa-mir-122a __ .:||.|||..||||||:.|||:| __ 5' CUAACCACAUUUGUCAU-CUCUA 3' ENST00000338052 E:-18.450001 S:100.000000 Loc:796 Cons: %(mmu) 90.91%(rno)
ENST00000258884	ENSG00000136379		1		ENSMUSG00000038459	ENSRNOG00000012683	ENSG00000136379 (1) (78703850 78703851 78762530 78763779 78787556) 1249 (1249 nt) [IPR000379:Esterase/lipase/thioesterase, active site;]	2	-43.51	212	ENSMUSG00000038459 (mmu-miR-132)	ENSRNOG00000012683 (mmu-miR-132)	hsa-mir-132 hsa-mir-148 mmu-mir-148a hsa-mir-16 hsa-mir-214 hsa-mir-301	hsa-mir-214 hsa-mir-148	0003824 catalytic activity IEA;	3' GACGGACAGACACG-GACGACA 5' hsa-mir-214 __ :||||.||:||||:.|||:||. __ 5' UUGCCAGUUUGUGUACUGUUGC 3' ENST00000258884 E:-26.32 S:108.000000 Loc:1178 Cons: 95.45%(mmu) 95.45%(rno)	3' UGUUUCAAGAC-AUCACG-UGACU 5' hsa-mir-148 __ :::|||.|.||.|||||:.||||: __ 5' GUGAAGCUGUGAUAGUGUAACUGG 3' ENST00000258884 E:-17.190001 S:104.000000 Loc:420 Cons: %(mmu) 91.67%(rno)
ENST00000232424	ENSG00000114315	HES1	1		ENSMUSG00000022528	ENSRNOG00000001720	TRANSCRIPTION FACTOR HES-1 (HAIRY AND ENHANCER OF SPLIT 1) (HAIRY- LIKE) (HHL) (HAIRY HOMOLOG). [Source:SWISSPROT;Acc:Q14469] ENSG00000114315 (1) (195174847 195175083 195176935 195177309 195532723) 37 HUGO:5192:FLJ20408 HES-1 Hes1 HRY [IPR001092:Basic helix-loop-helix dimerization domain bHLH; IPR000694:Proline-rich region;]	2	-44.84	212	ENSMUSG00000022528 (mmu-miR-18)	ENSRNOG00000001720 (mmu-miR-18)	hsa-mir-18 hsa-mir-24 hsa-mir-30d	hsa-mir-30d hsa-mir-24	0003677 DNA binding IEA; 0006355 regulation of transcription, DNA-dependent IEA; 0007275 development IEA; 0007399 neurogenesis IEA; 0005634 nucleus IEA;	3' GAAGGUCAGCCCCUACAAAUGU 5' hsa-mir-30d __ |||||..|:|||||.|||||:. __ 5' CUUCC-UUUGGGGAAGUUUAUU 3' ENST00000232424 E:-23.950001 S:109.000000 Loc:320 Cons: 100.00%(mmu) 100.00%(rno)	3' GACAAGGACGACUUGACUCGGU 5' hsa-mir-24 __ .|||||.|.:||:|:||.|||. __ 5' AUGUUCAUAUUGGAUUGCGCCU 3' ENST00000232424 E:-20.889999 S:103.000000 Loc:206 Cons: 100.00%(mmu) 100.00%(rno)
ENST00000323373_P	ENSG00000177463	NR2C2	1		ENSMUSG00000005893	ENSRNOG00000010536	ORPHAN NUCLEAR RECEPTOR TR4 (ORPHAN NUCLEAR RECEPTOR TAK1). [Source:SWISSPROT;Acc:P49116] ENSG00000177463 (1) (15020426 15020426 15059519 15059519 15223008) 4001 (4001 nt) HUGO:7972:hTAK1 TAK1 TR2R1 TR4 [IPR001628:Zn-finger, C4-type steroid receptor; IPR001723:Steroid hormone receptor; IPR000324:Vitamin D receptor; IPR000536:Ligand-binding domain of nuclear hormone receptor;]	2	-37.57	211	ENSMUSG00000005893 (mmu-miR-136)	ENSRNOG00000010536 (mmu-miR-136)	hsa-mir-136 hsa-mir-154 rno-mir-325	hsa-mir-136 rno-mir-325	0003700 transcription factor activity TAS; 0003707 steroid hormone receptor activity NR; 0003713 transcription co-activator activity TAS; 0006355 regulation of transcription, DNA-dependent TAS; 0007399 neurogenesis TAS; 0005634 nucleus NR;	3' AGGUAGUAGUUUUGUUUACCUCA 5' hsa-mir-136 __ .|::|.:.||:::||||||||.. __ 5' CCUGUGGGCAGGGCAAAUGGAAA 3' ENST00000323373_P E:-18.17 S:108.000000 Loc:460 Cons: 95.65%(mmu) 95.65%(rno)	3' UGUGAAUGACUCGUGGAUGAUCC 5' rno-mir-325 __ :|||||.||.|||||:||:.|.. __ 5' GCACUUUCUAAGCACUUAUCAAU 3' ENST00000323373_P E:-19.4 S:103.000000 Loc:414 Cons: %(mmu) 95.65%(rno)
ENST00000301738	ENSG00000167977		1		ENSMUSG00000016946	ENSRNOG00000005607	ENSG00000167977 (1) (2732419 2732471 2757249 2758950 2802576) 1701 (1701 nt) [IPR003131:K+ channel tetramerisation;]	2	-38.86	210		ENSRNOG00000005607 (rno-miR-129)	hsa-mir-129 hsa-mir-30d	hsa-mir-30d hsa-mir-129	0005249 voltage-gated potassium channel activity IEA; 0005515 protein binding IEA; 0006813 potassium ion transport IEA; 0008076 voltage-gated potassium channel complex IEA; 0016020 membrane IEA;	3' GAAGGUCAGCCCCUACAAAUGU 5' hsa-mir-30d __ .|||:|...||||||.||||:| __ 5' AUUCUA--AGGGGAUAUUUAUA 3' ENST00000301738 E:-18.969999 S:107.000000 Loc:1590 Cons: %(mmu) 100.00%(rno)	3' CGUUCGGGUCUGGCGUUUUUC 5' hsa-mir-129 __ |.||||::.|:|:|::|:||| __ 5' GGAAGCUU-GGCUGUGAGAAG 3' ENST00000301738 E:-19.889999 S:103.000000 Loc:68 Cons: %(mmu) 90.00%(rno)
ENST00000323926	ENSG00000115414	FN1	1		ENSMUSG00000026193	ENSRNOG00000014288	FIBRONECTIN PRECURSOR (FN) (COLD-INSOLUBLE GLOBULIN) (CIG). [Source:SWISSPROT;Acc:P02751] ENSG00000115414 (-1) (216428131 216428820 216503067 216503333 216205694) 689 (689 nt) HUGO:3778: [IPR006209:EGF-like domain; IPR000562:Type II fibronectin collagen-binding domain; IPR002086:Aldehyde dehydrogenase; IPR000083:Fibronectin, type I; IPR003962:Fibronectin, type III subdomain; IPR003961:Fibronectin…	2	-41.58	210	ENSMUSG00000026193 (mmu-miR-213)	ENSRNOG00000014288 (mmu-miR-27b)	hsa-mir-213 hsa-mir-27b	hsa-mir-27b hsa-mir-213	0005194 cell adhesion molecule activity IEA; 0005201 extracellular matrix structural constituent NAS; 0005518 collagen binding NAS; 0008201 heparin binding NAS; 0006953 acute-phase response IEA; 0007155 cell adhesion NAS; 0009611 response to wounding NAS; 0016477 cell migration NAS; 0005576 extracellular NAS; 0005576 extracellular IEA; 0005578 extracellular matrix NAS;	3' GUCUUGAAUCGGUGACACUU 5' hsa-mir-27b __ ||.|:|||..|:||||||:| __ 5' CAAAGCUUUACUACUGUGGA 3' ENST00000323926 E:-19.73 S:108.000000 Loc:636 Cons: 95.00%(mmu) 90.00%(rno)	3' CCAUGUUAGUUGCCAGCUACCA 5' hsa-mir-213 __ ||||:|||:.|:|||.|:||.| __ 5' GGUAUAAUU-AUGGUGGGUGAU 3' ENST00000323926 E:-21.85 S:102.000000 Loc:594 Cons: 90.48%(mmu) %(rno)
ENST00000289119	ENSG00000158201	ABHD3	1		ENSMUSG00000002475	ENSRNOG00000013537	ALPHA/BETA HYDROLASE DOMAIN CONTAINING PROTEIN 3; LUNG ALPHA/BETA HYDROLASE 3. [Source:RefSeq;Acc:NM_138340] ENSG00000158201 (-1) (17482845 17483539 17536712 17536713 17432833) 694 (694 nt) HUGO:18718:LABH3 [IPR000952:Protein of unknown function UPF0017; IPR000379:Esterase/lipase/thioesterase, active site;]	2	-44.82	210	ENSMUSG00000002475 (hsa-miR-133a)	ENSRNOG00000013537 (rno-miR-351)	hsa-mir-133a mmu-mir-133 rno-mir-328 rno-mir-351	hsa-mir-133a rno-mir-351	0003824 catalytic activity IEA; 0005554 molecular_function unknown IEA;	3' UGUCGACCAACUUCCCCUGGUU 5' hsa-mir-133a __ :|||.|||.|||||.||.|||: __ 5' GCAGAUGGGUGAAGAGGUCCAG 3' ENST00000289119 E:-24.030001 S:108.000000 Loc:99 Cons: 100.00%(mmu) %(rno)	3' GUCCGAGUUUCCCGAGGAGUCCCU 5' rno-mir-351 __ ||..:|:.||...:|||||||||. __ 5' CAAAUUUUAA---UUCCUCAGGGU 3' ENST00000289119 E:-20.790001 S:102.000000 Loc:296 Cons: %(mmu) 90.48%(rno)
ENST00000256497	ENSG00000134109		1		ENSMUSG00000030104	ENSRNOG00000007944	PUTATIVE ALPHA-MANNOSIDASE KIAA0212 (EC 3.2.1.-). [Source:SWISSPROT;Acc:Q92611] ENSG00000134109 (1) (5204433 5204491 5232603 5236642 5300104) 4039 (4039 nt) [IPR001687:ATP/GTP-binding site motif A (P-loop); IPR001382:Glycoside hydrolase, family 47;]	2	-44.11	209	ENSMUSG00000030104 (mmu-miR-290)	ENSRNOG00000007944 (mmu-miR-17_3p)	hsa-mir-17_3p mmu-mir-290	hsa-mir-17_3p mmu-mir-290	0004571 mannosyl-oligosaccharide 1,2-alpha-mannosidase activity IEA; 0005509 calcium ion binding IEA; 0016798 hydrolase activity, acting on glycosyl bonds IEA; 0005975 carbohydrate metabolism IEA; 0006487 N-linked glycosylation IEA; 0016021 integral to membrane IEA;	3' UGUUCACGG--AAGUGACGUCA 5' hsa-mir-17_3p __ .|.||||||..|||.||||||. __ 5' UCUAGUGCCUCUUCCCUGCAGG 3' ENST00000256497 E:-22.43 S:106.000000 Loc:3491 Cons: %(mmu) 90.91%(rno)	3' UUUUUCACGGGGGUAUCAAACUC 5' mmu-mir-290 __ ..:|:|..|:|||||||||..|| __ 5' CUGAGGAACUCCCAUAGUUCCAG 3' ENST00000256497 E:-21.68 S:103.000000 Loc:860 Cons: 91.30%(mmu) %(rno)
ENST00000286371	ENSG00000069849	ATP1B3	1		ENSMUSG00000032412	ENSRNOG00000011501	SODIUM/POTASSIUM-TRANSPORTING ATPASE BETA-3 CHAIN (SODIUM/POTASSIUM- DEPENDENT ATPASE BETA-3 SUBUNIT) (ATPB-3). [Source:SWISSPROT;Acc:P54709] ENSG00000069849 (1) (142916553 142916553 142965452 1429662 HUGO:806: [IPR000402:Na+/K+ ATPase, beta subunit;]	2	-37.19	208	ENSMUSG00000032412 (mmu-let-7a)	ENSRNOG00000011501 (mmu-let-7a)	hsa-let-7a hsa-let-7b hsa-let-7c hsa-mir-196 hsa-mir-214	hsa-mir-196	0005391 sodium/potassium-exchanging ATPase activity TAS; 0006810 transport TAS; 0006813 potassium ion transport IEA; 0006814 sodium ion transport IEA; 0005890 sodium/potassium-exchanging ATPase complex TAS; 0016021 integral to membrane IEA;	3' UUGAUAUGUUGGAUGAUGGAGU 5' hsa-let-7a __ ||.||.||.:|||::|:||||. __ 5' AAGUA-ACUGCCUGUUGCCUCU 3' ENST00000286371 E:-19.370001 S:105.000000 Loc:169 Cons: 95.24%(mmu) 95.24%(rno)	3' GGUUGUUGUACUUUGAUGGAU 5' hsa-mir-196 __ |:|:.|.:||||:||.||||. __ 5' CUAGAAUUAUGAGACCACCUU 3' ENST00000286371 E:-17.82 S:103.000000 Loc:73 Cons: 90.48%(mmu) %(rno)
ENST00000318766	ENSG00000179348	GATA2	1		ENSMUSG00000015053	ENSRNOG00000012347	ENDOTHELIAL TRANSCRIPTION FACTOR GATA-2. [Source:SWISSPROT;Acc:P23769] ENSG00000179348 (-1) (129519181 129520771 129526783 129532937 129507001) 1590 (1590 nt) HUGO:4171:NFE1B [IPR000679:Zn-finger, GATA type;]	2	-42.66	207	ENSMUSG00000015053 (mmu-miR-125b)	ENSRNOG00000012347 (mmu-miR-125b)	hsa-mir-125b hsa-mir-129 mmu-mir-298	mmu-mir-298 hsa-mir-129	0003700 transcription factor activity TAS; 0006355 regulation of transcription, DNA-dependent IEA; 0006366 transcription from Pol II promoter TAS; 0008151 cell growth and/or maintenance TAS; 0005634 nucleus TAS;	3' CCUUCUUGUCGGGAGGAGACGG 5' mmu-mir-298 __ |.||..|||.||:|::|||||: __ 5' GUAAAUACAUCCUUUUUCUGCU 3' ENST00000318766 E:-19.860001 S:109.000000 Loc:782 Cons: 90.91%(mmu) %(rno)	3' CGUUCGGGUCUGGCGUUUUUC 5' hsa-mir-129 __ .||:|.|::|::|.||::||| __ 5' CCAGGGCUGGGUCACAGGAAG 3' ENST00000318766 E:-22.799999 S:98.000000 Loc:637 Cons: 100.00%(mmu) 100.00%(rno)
ENST00000294976_P	ENSG00000162885		1		ENSMUSG00000039242	ENSRNOG00000016855	ENSG00000162885 (-1) (232654670 232654670 232708701 232708930 232532650) 4001 (4001 nt) [IPR002659:Glycosyl transferase, family 31;]	2	-45.16	207	ENSMUSG00000039242 (mmu-miR-145)	ENSRNOG00000016855 (mmu-miR-320)	hsa-mir-145 hsa-mir-320 hsa-mir-sf202_seth	hsa-mir-320 hsa-mir-145	0008378 galactosyltransferase activity IEA; 0006486 protein amino acid glycosylation IEA; 0016020 membrane IEA;	3' AAGCGGGAGAGUUGGGUCGAAAA 5' hsa-mir-320 __ .|||.::||||.:|||:||||.| __ 5' CUCGAUUUCUCUGCCCGGCUUCU 3' ENST00000294976_P E:-27.08 S:115.000000 Loc:1518 Cons: %(mmu) 91.30%(rno)	3' UUCCCUAAGGACCCUUUUGACCUG 5' hsa-mir-145 __ |..|||..::||.|||:||..||| __ 5' ACAGGAACUUUGAGAAGACGUGAC 3' ENST00000294976_P E:-18.08 S:92.000000 Loc:1804 Cons: 100.00%(mmu) %(rno)
ENST00000216106	ENSG00000100281	HMG2L1	1		ENSMUSG00000034518	ENSRNOG00000013878	HIGH-MOBILITY GROUP PROTEIN 2-LIKE 1 (HMGBCG PROTEIN). [Source:SWISSPROT;Acc:Q9UGU5] ENSG00000100281 (1) (33978050 33982938 34014198 34016353 34020400) 2155 (2155 nt) HUGO:5003:THC211630 [IPR002048:Calcium-binding EF-hand; IPR000910:HMG1/2 (high mobility group) box;]	2	-38.07	206	ENSMUSG00000034518 (mmu-let-7c)	ENSRNOG00000013878 (mmu-miR-292_3p)	hsa-let-7c hsa-let-7b mmu-mir-292_3p	mmu-mir-292_3p 106	0003677 DNA binding NAS; 0006355 regulation of transcription, DNA-dependent IEA; 0008333 endosome to lysosome transport NAS; 0005634 nucleus NAS;	3' UGUGAGUUUUGGACCGCCGUGAA 5' mmu-mir-292_3p __ |:|.||.:.||||.|:||:|:|| __ 5' AUAAUCUGUACCUUGUGGUAUUU 3' ENST00000216106 E:-18.32 S:106.000000 Loc:1961 Cons: 100.00%(mmu) 100.00%(rno)	3' UUGGUAUGUUGGAU-GAUGGAGU 5' hsa-let-7c __ :|||||.::.|:||.||::||:| __ 5' GACCAUUUGCCUUACCUGUCUUA 3' ENST00000216106 E:-19.75 S:100.000000 Loc:396 Cons: 95.65%(mmu) %(rno)
ENST00000323397	ENSG00000181039		1		ENSMUSG00000049097	ENSRNOG00000026268	ENSG00000181039 (1) (143221279 143222016 143223506 143224334 143225773) 828 (828 nt) [IPR002965:Proline-rich extensin; IPR002110:Ankyrin; IPR000694:Proline-rich region;]	2	-41.52	206	ENSMUSG00000049097 (mmu-let-7e)	ENSRNOG00000026268 (mmu-let-7e)	hsa-let-7e hsa-mir-321	hsa-mir-321 104		3' CUUGGGUGUUAGGGACCGAAU 5' hsa-mir-321 __ |||...:||||||||.||||. __ 5' GAA---GCAAUCCCUUGCUUU 3' ENST00000323397 E:-18.93 S:104.000000 Loc:381 Cons: %(mmu) 94.44%(rno)	3' UGAUAUGUUGGAGGAUGGAGU 5' hsa-let-7e __ |||...||||:||||:|:|:. __ 5' ACUUCUCAACUUCCUGCUUUU 3' ENST00000323397 E:-22.59 S:102.000000 Loc:622 Cons: 90.48%(mmu) 95.24%(rno)
ENST00000262710	ENSG00000100813	ACINUS	1		ENSMUSG00000022185	ENSRNOG00000013533	APOPTOTIC CHROMATIN CONDENSATION INDUCER IN THE NUCLEUS (ACINUS). [Source:SWISSPROT;Acc:Q9UKV3] ENSG00000100813 (-1) (21517904 21518485 21554623 21554951 21515164) 581 (581 nt) HUGO:17066:KIAA0670 [IPR003034:DNA-binding SAP; IPR001680:G-protein beta WD-40 repeat;]	2	-36.14	205	ENSMUSG00000022185 (mmu-miR-154)	ENSRNOG00000013533 (mmu-miR-154)	hsa-mir-154 hsa-mir-206 hsa-mir-27b rno-mir-337 rno-mir-344	rno-mir-337 hsa-mir-206	0003677 DNA binding IEA; 0016887 ATPase activity NAS; 0019899 enzyme binding NAS; 0006915 apoptosis IEA; 0030218 erythrocyte differentiation IEP; 0030263 apoptotic chromosome condensation IDA; 0045657 positive regulation of monocyte differentiation IEP; 0005634 nucleus IDA;	3' UUUCCGUAGUAUAUCCUCGACUU 5' rno-mir-337 __ :|..|.:|||..||.|||||||| __ 5' GACUGGGUCACCUAUGAGCUGAA 3' ENST00000262710 E:-17.6 S:108.000000 Loc:371 Cons: 100.00%(mmu) 100.00%(rno)	3' GGUGUGUGAAGGAAUGUAAGGU 5' hsa-mir-206 __ ||||.|.:||||||.::|||.| __ 5' CCAC-CUUUUCCUUUUGUUCAA 3' ENST00000262710 E:-18.540001 S:97.000000 Loc:487 Cons: 100.00%(mmu) 100.00%(rno)
ENST00000230235	ENSG00000112473	HKE4	1		ENSMUSG00000024327	ENSRNOG00000000465	HISTIDINE-RICH MEMBRANE PROTEIN KE4. [Source:SWISSPROT;Acc:Q92504] ENSG00000112473 (1) (33215549 33215910 33218477 33219100 33219307) 623 (623 nt) HUGO:4927:D6S2244E H2-KE4 KE4 RING5 [IPR002395:HMW kininogen; IPR003689:Zinc transporter ZIP;]	2	-42.77	205		ENSRNOG00000000465 (mmu-miR-124a)	hsa-mir-124a rno-mir-347	rno-mir-347 hsa-mir-124a	0046873 metal ion transporter activity IEA; 0030001 metal ion transport IEA; 0005624 membrane fraction TAS; 0016021 integral to membrane IEA;	3' ACCCGCUGGGUCUCCCUGU 5' rno-mir-347 __ ||.|.|:.||||||||||. __ 5' UGAGAGG-CCAGAGGGACC 3' ENST00000230235 E:-21.83 S:108.000000 Loc:183 Cons: %(mmu) 100.00%(rno)	3' ACCGUAAGUGGCGCACGGAAUU 5' hsa-mir-124a __ ...|||..|:||:|||:|.|:| __ 5' AAACAUCAAUCGUGUGUCCUGA 3' ENST00000230235 E:-20.940001 S:97.000000 Loc:454 Cons: %(mmu) 95.45%(rno)
ENST00000328074	ENSG00000168439	STIP1	1		ENSMUSG00000024966	ENSRNOG00000021164	STRESS-INDUCED-PHOSPHOPROTEIN 1 (STI1) (HSP70/HSP90-ORGANIZING PROTEIN) (TRANSFORMATION-SENSITIVE PROTEIN IEF SSP 3521). [Source:SWISSPROT;Acc:P31948] ENSG00000168439 (1) (63728104 63728372 63746958 6 HUGO:11387: [IPR001440:TPR repeat; IPR000694:Proline-rich region;]	2	-49.64	205	ENSMUSG00000024966 (mmu-miR-210)	ENSRNOG00000021164 (mmu-miR-210)	hsa-mir-210 hsa-mir-296	hsa-mir-296 hsa-mir-210	0006950 response to stress TAS; 0005634 nucleus TAS; 0005794 Golgi apparatus TAS;	3' UGUCCUAACUCCCCCCCGGGA 5' hsa-mir-296 __ |::||:..|:|.|||||::|| __ 5' AUGGGGAGGGGAGGGGGUUCU 3' ENST00000328074 E:-29.07 S:104.000000 Loc:313 Cons: 90.48%(mmu) %(rno)	3' GUCGGCGACAGUGUGCGUGUC 5' hsa-mir-210 __ |..:|.|.|.||||||||::| __ 5' CCCUCCCAG-CACACGCAUGG 3' ENST00000328074 E:-20.57 S:101.000000 Loc:186 Cons: 100.00%(mmu) 100.00%(rno)
ENST00000295925	ENSG00000163660	CCNL1	1		ENSMUSG00000027829	ENSRNOG00000011586	CYCLIN L1; CYCLIN L ANIA-6A. [Source:RefSeq;Acc:NM_020307] ENSG00000163660 (-1) (158186501 158195755 158198796 158198837 157849435) 1779 (1779 nt) HUGO:20569:ania-6a [IPR004827:Basic-leucine zipper (bZIP) transcription factor; IPR006671:Cyclin, N-terminal domain;]	2	-34.37	203		ENSRNOG00000011586 (mmu-miR-21)	hsa-mir-21 mmu-mir-300	hsa-mir-21 mmu-mir-300	0003677 DNA binding IEA; 0000910 cytokinesis IEA; 0006355 regulation of transcription, DNA-dependent IEA; 0007049 cell cycle IEA; 0005634 nucleus IEA;	3' AGUUGUAGUCAGACUAUUCGAU 5' hsa-mir-21 __ |||:.||.:|.|||||.:|||| __ 5' UCAGGAU-GGCCUGAUUGGCUA 3' ENST00000295925 E:-17.15 S:108.000000 Loc:284 Cons: %(mmu) 100.00%(rno)	3' CUUCUCUCGA-ACGGGA-ACGUAU 5' mmu-mir-300 __ ..|.|||.||.||||||.||||.. __ 5' UCAUAGAACUCUGCCCUCUGCACU 3' ENST00000295925 E:-17.219999 S:95.000000 Loc:249 Cons: %(mmu) 91.67%(rno)
ENST00000327283	ENSG00000175354	PTPN2	1		ENSMUSG00000024539	ENSRNOG00000017453	PROTEIN-TYROSINE PHOSPHATASE, NON-RECEPTOR TYPE 2 (EC 3.1.3.48) (T- CELL PROTEIN-TYROSINE PHOSPHATASE) (TCPTP). [Source:SWISSPROT;Acc:P17706] ENSG00000175354 (-1) (12775485 12775822 12821004 12874177 HUGO:9650:PTPT TCELLPTP [IPR000387:Tyrosine specific protein phosphatase and dual specificity protein phosphatase; IPR000242:Tyrosine specific protein phosphatase;]	2	-42.52	203	ENSMUSG00000024539 (mmu-miR-184)		hsa-mir-184 hsa-mir-188	hsa-mir-188 hsa-mir-184	0004727 prenylated protein tyrosine phosphatase activity IEA; 0016787 hydrolase activity IEA; 0006470 protein amino acid dephosphorylation TAS; 0004725 protein tyrosine phosphatase activity IEA;	3' UGGGAGGUGGUACGUUCCCUAC 5' hsa-mir-188 __ |..||::|.|||.||:|||||| __ 5' AAACUUUA-CAUCCAGGGGAUG 3' ENST00000327283 E:-23.690001 S:109.000000 Loc:141 Cons: 90.48%(mmu) %(rno)	3' UGGGAAUAGUCAAGAGGCAGGU 5' hsa-mir-184 __ ..|||.|.|||||.|::||::| __ 5' UGCCUCA-CAGUUGUUUGUUUA 3' ENST00000327283 E:-18.83 S:94.000000 Loc:113 Cons: 90.48%(mmu) %(rno)
ENST00000305575	ENSG00000171766	GATM	1		ENSMUSG00000027199	ENSRNOG00000000168	GLYCINE AMIDINOTRANSFERASE, MITOCHONDRIAL PRECURSOR (EC 2.1.4.1) (L- ARGININE:GLYCINE AMIDINOTRANSFERASE) (TRANSAMIDINASE) (AT). [Source:SWISSPROT;Acc:P50440] ENSG00000171766 (-1) (43369380 43370363 4 HUGO:4175: [IPR000531:TonB-dependent receptor protein; IPR003198:Amidinotransferase;]	2	-39.94	202	ENSMUSG00000027199 (mmu-let-7d)		hsa-let-7d hsa-let-7e hsa-mir-17_3p	hsa-mir-17_3p	0015068 glycine amidinotransferase activity TAS; 0016740 transferase activity IEA; 0006601 creatine biosynthesis TAS; 0005739 mitochondrion NR; 0005829 cytosol NR;	3' UGAUACGUUGGAUGAUGGAGA 5' hsa-let-7d __ |.||..:||||..|||||||| __ 5' AAUAAUUAACCAUCUACCUCU 3' ENST00000305575 E:-19.09 S:101.000000 Loc:289 Cons: 95.24%(mmu) %(rno)	3' UGUUCACGGAAGUGACGUCA 5' hsa-mir-17_3p __ |.||||||.|..||||:||| __ 5' AAAAGUGCAUGAACUGUAGU 3' ENST00000305575 E:-20.85 S:101.000000 Loc:76 Cons: 90.00%(mmu) %(rno)
ENST00000263905	ENSG00000085932	MBD5	1		ENSMUSG00000036792	ENSRNOG00000027596	METHYL-CPG BINDING DOMAIN PROTEIN 5. [Source:RefSeq;Acc:NM_018328] ENSG00000085932 (1) (149426807 149427085 149481279 149481789 149613338) 510 (510 nt) HUGO:20444:FLJ11113 KIAA1461 [IPR000313:PWWP domain; IPR001739:Methyl-CpG binding;]	2	-37.11	201	ENSMUSG00000036792 (mmu-miR-323)	ENSRNOG00000027596 (rno-miR-323)	rno-mir-323 rno-mir-333	rno-mir-323 rno-mir-333	0003677 DNA binding IEA;	3' UCUCCAGCUGG-CACAUUACACG 5' rno-mir-323 __ |||.|.|.|||.||||||.|||. __ 5' AGA-GACUACCAGUGUAAAGUGA 3' ENST00000263905 E:-18.98 S:102.000000 Loc:470 Cons: 95.45%(mmu) 95.45%(rno)	3' UUUUCAUUGAUCGU-GUGGUG 5' rno-mir-333 __ :.|:.||:|||.||.|||||| __ 5' GCAGAUAGCUACCACCACCAC 3' ENST00000263905 E:-18.129999 S:99.000000 Loc:107 Cons: 95.24%(mmu) 95.24%(rno)
ENST00000251849	ENSG00000132155	RAF1	1		ENSMUSG00000000441	ENSRNOG00000010153	RAF PROTO-ONCOGENE SERINE/THREONINE-PROTEIN KINASE (EC 2.7.1.-) (RAF-1) (C-RAF). [Source:SWISSPROT;Acc:P04049] ENSG00000132155 (-1) (12600108 12601013 12635220 12680614 12175852) 905 (905 nt) HUGO:9829: [IPR000719:Protein kinase; IPR002290:Serine/Threonine protein kinase; IPR002219:Protein kinase C, phorbol ester/diacylglycerol binding; IPR001245:Tyrosine protein kinase; IPR003116:Raf-like Ras-bi…	2	-35.73	200	ENSMUSG00000000441 (mmu-miR-146)	ENSRNOG00000010153 (mmu-miR-185)	hsa-mir-146 hsa-mir-185 mmu-mir-7b	mmu-mir-7b hsa-mir-185	0004674 protein serine/threonine kinase activity IEA; 0004713 protein-tyrosine kinase activity IEA; 0005057 receptor signaling protein activity IEA; 0005524 ATP binding IEA; 0016740 transferase activity IEA; 0019992 diacylglycerol binding IEA; 0006468 protein amino acid phosphorylation TAS; 0006915 apoptosis TAS; 0007242 intracellular signaling cascade IEA; 0008283 cell proliferation TAS; 0005741…	3' UUGUUUUAGUGUUCAGAAGGU 5' mmu-mir-7b __ :.||::|.:|||:||:|||:. __ 5' GCCAGGAAUACAGGUUUUCUU 3' ENST00000251849 E:-18.370001 S:105.000000 Loc:788 Cons: 100.00%(mmu) 100.00%(rno)	3' CUUGACGGAAAGAGAGGU 5' hsa-mir-185 __ ..::||||||.:|:||:| __ 5' AUGUUGCCUUCUUUUCUA 3' ENST00000251849 E:-17.360001 S:95.000000 Loc:151 Cons: %(mmu) 94.44%(rno)
ENST00000331892	ENSG00000066136	NFYC	1		ENSMUSG00000032897	ENSRNOG00000010735	NUCLEAR TRANSCRIPTION FACTOR Y SUBUNIT GAMMA (NF-Y PROTEIN CHAIN C) (NUCLEAR FACTOR YC) (NF-YC) (CCAAT-BINDING TRANSCRIPTION FACTOR SUBUNIT C) (CBF-C) (TRANSACTIVATOR HSM-1/2). [Source:SWISSPROT;Acc:Q HUGO:7806:CBF-C [IPR003958:Transcription factor CBF/NF-Y/archaeal histone; IPR007124:Histone-fold/TFIID-TAF/NF-Y;]	2	-41.57	200	ENSMUSG00000032897 (rno-miR-333)		rno-mir-333 hsa-mir-34a hsa-mir-9	hsa-mir-34a hsa-mir-9	0003700 transcription factor activity TAS; 0006355 regulation of transcription, DNA-dependent TAS; 0005634 nucleus NAS; 0003677 DNA binding IEA; 0006355 regulation of transcription, DNA-dependent IEA; 0005634 nucleus IEA;	3' UGUUGGUCGAUUCUGUGACGGU 5' hsa-mir-34a __ .|.:|.:||||:|||||||.:: __ 5' CCUGCAGGCUAGGACACUGGUG 3' ENST00000331892 E:-22.76 S:104.000000 Loc:108 Cons: 90.91%(mmu) %(rno)	3' AGUAUGUCGAUC-UAUUGGUUUCU 5' hsa-mir-9 __ .|.|:.||||:|.|.::||||:|| __ 5' GCCUG-AGCUGGCAAGGCCAAGGA 3' ENST00000331892 E:-18.809999 S:96.000000 Loc:3 Cons: 91.30%(mmu) %(rno)
ENST00000333913	ENSG00000164082	GRM2	1		ENSMUSG00000023192	ENSRNOG00000013171	METABOTROPIC GLUTAMATE RECEPTOR 2 PRECURSOR (MGLUR2). [Source:SWISSPROT;Acc:Q14416] ENSG00000164082 (1) (51700154 51700156 51711176 51711671 51822499) 495 (495 nt) HUGO:4594:GPRC1B mGlu2 MGLUR2 [IPR000337:G-protein coupled receptors family 3 (Metabotropic glutamate receptor-like); IPR001458:Metabotropic glutamate receptor 2; IPR000162:Metabotropic glutamate receptor; IPR001234:Metabotropic glutam…	2	-45.4	200	ENSMUSG00000023192 (rno-miR-140*)	ENSRNOG00000013171 (rno-miR-140*)	rno-mir-140* hsa-mir-34a	rno-mir-140* hsa-mir-34a	0004872 receptor activity IEA; 0008067 metabotropic glutamate, GABA-B-like receptor activity IEA; 0016020 membrane IEA; 0008067 metabotropic glutamate, GABA-B-like receptor activity TAS; 0007186 G-protein coupled receptor protein signaling pathway IEA; 0007194 negative regulation of adenylate cyclase activity TAS; 0007268 synaptic transmission TAS; 0005887 integral to plasma membrane TAS;	3' ACAGG-CACCAAGAUGGGACACCAU 5' rno-mir-140* __ |||||.||||||.||:::|||..|| __ 5' UGUCCUGUGGUU-UAUUUUGUAUUA 3' ENST00000333913 E:-23.16 S:104.000000 Loc:446 Cons: 95.83%(mmu) 95.83%(rno)	3' UGUUGGUCGAUUCUGUGACGGU 5' hsa-mir-34a __ :.|::::|||::.:||||||.| __ 5' GAAGUUGGCUGGAGCACUGCAA 3' ENST00000333913 E:-22.24 S:96.000000 Loc:73 Cons: %(mmu) 90.91%(rno)
ENST00000265010	ENSG00000111859	NEDD9	1		ENSMUSG00000021365	ENSRNOG00000014548	ENHANCER OF FILAMENTATION 1 (HEF1) (CRK-ASSOCIATED SUBSTRATE-RELATED PROTEIN) (CAS-L) (CASL) (PP105) (NEURAL PRECURSOR CELL EXPRESSED DEVELOPMENTALLY DOWN-REGULATED 9). [Source:SWISSPROT;Acc:Q14511] E HUGO:7733:CAS-L HEF1 [IPR001452:SH3 domain;]	2	-37.38	199	ENSMUSG00000021365 (mmu-miR-103)	ENSRNOG00000014548 (mmu-miR-189)	hsa-mir-103 hsa-mir-107 hsa-mir-189 rno-mir-20* rno-mir-325	rno-mir-325 rno-mir-20*	0005194 cell adhesion molecule activity IEA; 0000074 regulation of cell cycle TAS; 0001558 regulation of cell growth IEA; 0007067 mitosis IEA; 0007155 cell adhesion NR; 0007165 signal transduction TAS; 0005634 nucleus TAS; 0005819 spindle TAS; 0005856 cytoskeleton IEA;	3' UGU-GAAUGACUCGUGGAUGAUCC 5' rno-mir-325 __ :||.||||.|.|||||||.|||.. __ 5' GCACCUUAGUAAGCACCUUCUAAU 3' ENST00000265010 E:-19.17 S:107.000000 Loc:337 Cons: 91.67%(mmu) %(rno)	3' ACAUUCA-CGAG-CAUUACGUCA 5' rno-mir-20* __ |||:|||.|:||.||.|||.:|| __ 5' UGUGAGUGGUUCAGUCAUGAGGU 3' ENST00000265010 E:-18.209999 S:92.000000 Loc:774 Cons: %(mmu) 91.30%(rno)
ENST00000271965	ENSG00000143641	GALNT2	1		ENSMUSG00000031977	ENSRNOG00000019143	POLYPEPTIDE N-ACETYLGALACTOSAMINYLTRANSFERASE 2; UDP-GALNAC TRANSFERASE 2. [Source:RefSeq;Acc:NM_004481] ENSG00000143641 (1) (227237961 227238033 227450209 227452870 227813241) 2661 (2661 nt) HUGO:4124:GalNAc-T2 [IPR001173:Glycosyl transferase, family 2; IPR000772:Ricin B lectin domain;]	2	-37.65	199	ENSMUSG00000031977 (mmu-let-7e)		hsa-let-7e hsa-mir-20 rno-mir-330 rno-mir-7* hsa-mir-93	rno-mir-330 rno-mir-7*	0004653 polypeptide N-acetylgalactosaminyltransferase activity TAS; 0016740 transferase activity IEA; 0006493 O-linked glycosylation TAS;	3' AGAGACGUCCGGGACACGAAACG 5' rno-mir-330 __ .||.|.|||..|:|||.|||||: __ 5' GCUGUACAGAGCUUGUACUUUGU 3' ENST00000271965 E:-18.9 S:105.000000 Loc:2575 Cons: 100.00%(mmu) %(rno)	3' AUACCGUCUGACACU-AAACAAC 5' rno-mir-7* __ .||||:|..||||||.|.||||. __ 5' GAUGGUA-UCUGUGAGUAUGUUU 3' ENST00000271965 E:-18.75 S:94.000000 Loc:2495 Cons: 90.91%(mmu) %(rno)
ENST00000311979	ENSG00000172660	TAF15	1		ENSMUSG00000020680	ENSRNOG00000010604	TATA-BINDING PROTEIN ASSOCIATED FACTOR 2N (RNA-BINDING PROTEIN 56) (TAFII68) (TAF(II)68). [Source:SWISSPROT;Acc:Q92804] ENSG00000172660 (1) (34282033 34282034 34319499 34319787 34537194) 288 (288 nt) HUGO:11547:hTAFII68 RBP56 TAF2N [IPR001064:Beta and gamma crystallin; IPR002952:Eggshell protein; IPR000817:Prion protein; IPR000504:RNA-binding region RNP-1 (RNA recognition motif); IPR001876:Zn-fin…	2	-38.24	199	ENSMUSG00000020680 (rno-miR-336)	ENSRNOG00000010604 (mmu-miR-182)	hsa-mir-182 rno-mir-336	hsa-mir-182 rno-mir-336	0003697 single-stranded DNA binding NR; 0003702 RNA polymerase II transcription factor activity NR; 0003727 single-stranded RNA binding NR; 0008151 cell growth and/or maintenance IEA; 0005634 nucleus IEA; 0005669 transcription factor TFIID complex NR;	3' ACACUCAAGA--UGGUAACGGUUU 5' hsa-mir-182 __ ..||.|||.|..|.:||||||||| __ 5' AAUGCGUUGUAAAAUAUUGCCAAA 3' ENST00000311979 E:-18.49 S:107.000000 Loc:218 Cons: %(mmu) 91.67%(rno)	3' UCUGAUCUAUACCUUCCC-ACU 5' rno-mir-336 __ ..|:|.|:.:|||:||||.||: __ 5' UUAUUUGG-GUGGGAGGGCUGG 3' ENST00000311979 E:-19.75 S:92.000000 Loc:121 Cons: 90.48%(mmu) 95.24%(rno)
ENST00000337324_P	ENSG00000143437	ARNT	1		ENSMUSG00000015522	ENSRNOG00000021148	ARYL HYDROCARBON RECEPTOR NUCLEAR TRANSLOCATOR (ARNT PROTEIN) (DIOXIN RECEPTOR, NUCLEAR TRANSLOCATOR) (HYPOXIA-INDUCIBLE FACTOR 1 BETA) (HIF-1 BETA). [Source:SWISSPROT;Acc:P27540] ENSG00000143437 (-1) HUGO:700:HIF-1beta [IPR001092:Basic helix-loop-helix dimerization domain bHLH; IPR001067:Nuclear translocator; IPR000014:PAS domain;]	2	-39.46	199	ENSMUSG00000015522 (mmu-miR-145)		hsa-mir-145 hsa-mir-205	hsa-mir-205 hsa-mir-145	0003700 transcription factor activity TAS; 0003713 transcription co-activator activity TAS; 0004871 signal transducer activity IEA; 0005061 aryl hydrocarbon receptor nuclear translocator activity TAS; 0000060 protein-nucleus import, translocation NR; 0006355 regulation of transcription, DNA-dependent IEA; 0007165 signal transduction IEA; 0005634 nucleus TAS; 0004872 receptor activity IEA;	3' GUCUGAGGCCAC-CUUACUUCCU 5' hsa-mir-205 __ .|.|:||:|..|.||:||:|||| __ 5' GAAAUUCUGAAGAGAGUGGAGGA 3' ENST00000337324_P E:-22.370001 S:102.000000 Loc:374 Cons: 91.30%(mmu) %(rno)	3' UUCCCUAAGGAC--CCUUUUGACCUG 5' hsa-mir-145 __ |:|..|||:|||...|:|||||..|| __ 5' AGGUUAUUUCUGCAUGGAAACUCAAC 3' ENST00000337324_P E:-17.09 S:97.000000 Loc:1000 Cons: 92.31%(mmu) %(rno)
ENST00000235382_P	ENSG00000116741	RGS2	1		ENSMUSG00000026360	ENSRNOG00000003687	REGULATOR OF G-PROTEIN SIGNALING 2 (RGS2) (G0/G1 SWITCH REGULATORY PROTEIN 8). [Source:SWISSPROT;Acc:P41220] ENSG00000116741 (1) (190066430 190066461 190068985 190068985 190317419) 4001 (4001 nt) HUGO:9998:G0S8 [IPR000342:Regulator of G protein;]	2	-38.26	197		ENSRNOG00000003687 (mmu-let-7b)	hsa-let-7b hsa-mir-149 rno-mir-346	rno-mir-346	0004871 signal transducer activity IEA; 0005096 GTPase activator activity TAS; 0005516 calmodulin binding TAS; 0007049 cell cycle IEA; 0007165 signal transduction IEA; 0008277 regulation of G-protein coupled receptor protein signaling pathway TAS;	3' UUGGUGUGU-UGGAUGAUGGAGU 5' hsa-let-7b __ .|:|||.||.|.|||:|:.:||| __ 5' CAUCACUCAGAACUAUUGAUUCA 3' ENST00000235382_P E:-18.34 S:99.000000 Loc:111 Cons: %(mmu) 91.30%(rno)	3' UCUCCGUCCGUGAGUCCGUCUGU 5' rno-mir-346 __ ..:||:||..|.|||||.||.|| __ 5' UUGGGUAGUGAAUCAGGAAGCCA 3' ENST00000235382_P E:-19.92 S:98.000000 Loc:138 Cons: %(mmu) 100.00%(rno)
ENST00000324015	ENSG00000167711	SERPINF2	1		ENSMUSG00000038224	ENSRNOG00000003233	ALPHA-2-ANTIPLASMIN PRECURSOR (ALPHA-2-PLASMIN INHIBITOR) (ALPHA-2-PI) (ALPHA-2-AP). [Source:SWISSPROT;Acc:P08697] ENSG00000167711 (1) (1852911 1854881 1864419 1865150 1876797) 731 (731 nt) HUGO:9075:A2AP AAP ALPHA-2-PI alpha-2-plasmin inhibitor API PLI [IPR000215:Serpin;]	2	-39.24	197	ENSMUSG00000038224 (hsa-miR-148)	ENSRNOG00000003233 (hsa-miR-148)	hsa-mir-148 mmu-mir-148a hsa-mir-sf202_seth	hsa-mir-sf202_seth hsa-mir-148	0004867 serine protease inhibitor activity IEA; 0004868 serpin TAS; 0006953 acute-phase response IEA; 0005794 Golgi apparatus NR;	3' GCGGGAGAGUUGGGUCGAAAA 5' hsa-mir-sf202_seth __ ..|:||:||.|.||:|||||. __ 5' GACUCUUUCCAACCGGCUUUG 3' ENST00000324015 E:-21.98 S:104.000000 Loc:58 Cons: 90.48%(mmu) %(rno)	3' UGUUUC-AAGACAUCACGUGACU 5' hsa-mir-148 __ ::||:|.||:|||||||.|:|.. __ 5' GUAAGGUUUUUGUAGUG-AUUUU 3' ENST00000324015 E:-17.26 S:93.000000 Loc:680 Cons: 90.91%(mmu) 95.45%(rno)
ENST00000245361_P	ENSG00000125304	TM9SF2	1		ENSMUSG00000025544	ENSRNOG00000012751	TRANSMEMBRANE 9 SUPERFAMILY PROTEIN MEMBER 2 PRECURSOR (P76). [Source:SWISSPROT;Acc:Q99805] ENSG00000125304 (1) (97851862 97851862 97913013 97913013 97956943) 4001 (4001 nt) HUGO:11865:P76 [IPR004240:Nonaspanin (TM9SF);]	2	-42.6	197	ENSMUSG00000025544 (mmu-miR-126)	ENSRNOG00000012751 (mmu-miR-126)	hsa-mir-126 rno-mir-328	rno-mir-328 hsa-mir-126	0005215 transporter activity IEA; 0006810 transport TAS; 0005768 endosome TAS; 0005887 integral to plasma membrane TAS;	3' UGCCUUCCCGUCUCUCCCGGUC 5' rno-mir-328 __ |:||.||..:||||:.|||||. __ 5' AUGGCAGAAUAGAGGAGGCCAU 3' ENST00000245361_P E:-23.690001 S:103.000000 Loc:299 Cons: %(mmu) 95.45%(rno)	3' CGUAAUAAUGAGUGCCAUGCU 5' hsa-mir-126 __ .|||||||.|.||:||||:.: __ 5' UCAUUAUU-CCCAUGGUAUUG 3' ENST00000245361_P E:-18.91 S:94.000000 Loc:541 Cons: 100.00%(mmu) 100.00%(rno)
ENST00000332029_P	ENSG00000185338	SOCS1	1		ENSMUSG00000038037	ENSRNOG00000002568	SUPPRESSOR OF CYTOKINE SIGNALING 1 (SOCS-1) (JAK-BINDING PROTEIN) (JAB) (STAT INDUCED STAT INHIBITOR 1) (SSI-1) (TEC-INTERACTING PROTEIN 3) (TIP-3). [Source:SWISSPROT;Acc:O15524] ENSG00000185338 (-1) HUGO:19383:Cish1 JAB SOCS-1 SSI-1 TIP3 [IPR000980:SH2 motif; IPR001496:SOCS protein, C-terminal;]	2	-43.68	197	ENSMUSG00000038037 (mmu-let-7g)		hsa-let-7g hsa-let-7e rno-mir-345	rno-mir-345	0004860 protein kinase inhibitor activity TAS; 0001558 regulation of cell growth IEA; 0007242 intracellular signaling cascade IEA; 0007259 JAK-STAT cascade TAS; 0005737 cytoplasm TAS;	3' UGAUAUGUUGGAGGAUGGAGU 5' hsa-let-7e __ :||:|:||:..|||||::|:| __ 5' GCUGUGCAGAAUCCUAUUUUA 3' ENST00000332029_P E:-24.33 S:106.000000 Loc:354 Cons: 90.48%(mmu) %(rno)	3' CGUGACCUGAUCCCCAGUCGU 5' rno-mir-345 __ ||||...||.||||||::|.: __ 5' GCAC-AAACCAGGGGUUGGGG 3' ENST00000332029_P E:-19.35 S:91.000000 Loc:310 Cons: 95.00%(mmu) %(rno)
ENST00000303635	ENSG00000171735	CAMTA1	1		ENSMUSG00000014592	ENSRNOG00000018602	MSTP023. [Source:SPTREMBL;Acc:Q8WYI3] ENSG00000171735 (1) (7506014 7514567 7536128 7537449 7540940) 1321 (1321 nt) HUGO:18806: [IPR002110:Ankyrin; IPR000048:IQ calmodulin-binding region; IPR002909:Cell surface receptor IPT/TIG; IPR005559:CG-1 domain; IPR001472:Bipartite nuclear localization signal;]	2	-34.59	196	ENSMUSG00000014592 (mmu-miR-19b)		hsa-mir-19b hsa-mir-223	hsa-mir-223 hsa-mir-19b		3' CCCCAUAAACUGUUUGACUGU 5' hsa-mir-223 __ ..|||:|.||::||||.|::| __ 5' CAGGUGUGUGGUAAACGGGUA 3' ENST00000303635 E:-17.35 S:99.000000 Loc:630 Cons: 90.48%(mmu) %(rno)	3' AGUCAAAACGUACCUAAACGUGU 5' hsa-mir-19b __ ||||...||||.||||||..||| __ 5' UCAG--CUGCA-GGAUUUUAACA 3' ENST00000303635 E:-17.24 S:97.000000 Loc:124 Cons: 95.00%(mmu) %(rno)
ENST00000265781_P	ENSG00000012174	MBTPS2	1		ENSMUSG00000046873	ENSRNOG00000007644	MEMBRANE-BOUND TRANSCRIPTION FACTOR SITE 2 PROTEASE (EC 3.4.24.-) (SITE-2 PROTEASE) (STEROL-REGULATORY ELEMENT-BINDING PROTEINS INTRAMEMBRANE PROTEASE). [Source:SWISSPROT;Acc:O43462] ENSG00000012174 ( HUGO:15455:S2P [IPR006025:Neutral zinc metallopeptidases, zinc-binding region; IPR001193:Mammalian sterol-regulatory element binding protein (SREBP) site 2 protease;]	2	-40.37	196	ENSMUSG00000046873 (mmu-miR-106b)	ENSRNOG00000007644 (mmu-miR-106b)	hsa-mir-106b hsa-mir-184	hsa-mir-106b hsa-mir-184	0004222 metalloendopeptidase activity TAS; 0008270 zinc ion binding IEA; 0016787 hydrolase activity IEA; 0006508 proteolysis and peptidolysis IEA; 0006629 lipid metabolism IEA; 0008203 cholesterol metabolism TAS; 0016021 integral to membrane TAS;	3' UAGACGUGACAGUCGUGAAAU 5' hsa-mir-106b __ .||||||:|||:..||:|||. __ 5' CUCUGCAUUGUUUACAUUUUU 3' ENST00000265781_P E:-21.07 S:98.000000 Loc:2392 Cons: 90.48%(mmu) 90.48%(rno)	3' UGGGAAUAGUCAAGAGGCAGGU 5' hsa-mir-184 __ ||:||.|.|..|.|||:||||. __ 5' ACUCUGAGCCAUACUCUGUCCU 3' ENST00000265781_P E:-19.299999 S:98.000000 Loc:970 Cons: %(mmu) 95.45%(rno)
ENST00000317338	ENSG00000063015	SEZ6	1		ENSMUSG00000000632	ENSRNOG00000009350	SEIZURE RELATED 6 HOMOLOG. [Source:RefSeq;Acc:NM_178860] ENSG00000063015 (-1) (27427486 27428530 27454612 27454614 27424072) 1044 (1044 nt) HUGO:15955: [IPR000436:Sushi domain/SCR domain/CCP module; IPR000859:CUB domain;]	2	-40.82	194	ENSMUSG00000000632 (mmu-let-7b)	ENSRNOG00000009350 (rno-miR-129*)	hsa-let-7b rno-mir-129* hsa-mir-28	rno-mir-129*		3' UUGGU-GUGUUGGAUGAUGGAGU 5' hsa-let-7b __ :.|||.||:::||||:|.:||:: __ 5' GCCCACCAUGGCCUAUUUUCUUG 3' ENST00000317338 E:-18.98 S:98.000000 Loc:154 Cons: 91.30%(mmu) %(rno)	3' UACG-AA-AAACCCCAUUCCCGAA 5' rno-mir-129* __ |||:.||.|.||||||..|||||. __ 5' AUGUAUUAUAUGGGGUCUGGGCUC 3' ENST00000317338 E:-21.84 S:96.000000 Loc:938 Cons: 91.67%(mmu) 91.67%(rno)
ENST00000223208	ENSG00000106477	TSGA14	1		ENSMUSG00000029790	ENSRNOG00000010950	TESTIS SPECIFIC, 14; TESTIS SPECIFIC PROTEIN A14. [Source:RefSeq;Acc:NM_018718] ENSG00000106477 (-1) (129589378 129591735 129620862 129633900 129398247) 2357 (2357 nt) HUGO:12370:DKFZp762H1311 [IPR001763:Rhodanese-like; IPR001472:Bipartite nuclear localization signal;]	2	-37.86	193	ENSMUSG00000029790 (hsa-miR-133a)	ENSRNOG00000010950 (mmu-miR-25)	hsa-mir-133a mmu-mir-133 hsa-mir-25	hsa-mir-25 hsa-mir-133a		3' AGUCUGGCUC--UGUUCACGUUAC 5' hsa-mir-25 __ ||..|::|||..|:.||||||||. __ 5' UCUAAUUGAGUAAUUAGUGCAAUU 3' ENST00000223208 E:-17.09 S:101.000000 Loc:977 Cons: 91.67%(mmu) 91.67%(rno)	3' UGUCGAC-CAACUUCCCCUGGUU 5' hsa-mir-133a __ ::|||||.|.|.||.|||||::| __ 5' GUAGCUGUGAU-AA-GGGACUGA 3' ENST00000223208 E:-20.77 S:92.000000 Loc:1215 Cons: 90.48%(mmu) %(rno)
ENST00000227288	ENSG00000109883	GPR48	1		ENSMUSG00000050199	ENSRNOG00000005715	LEUCINE-RICH REPEAT-CONTAINING G PROTEIN-COUPLED RECEPTOR 4 PRECURSOR (G PROTEIN-COUPLED RECEPTOR 48). [Source:SWISSPROT;Acc:Q9BXB1] ENSG00000109883 (-1) (27351819 27353723 27458158 27458602 27349162) HUGO:13299:LGR4 [IPR007087:Zn-finger, C2H2 type; IPR002131:Glycoprotein hormone receptor; IPR000276:Rhodopsin-like GPCR superfamily; IPR001611:Leucine-rich repeat; IPR000372:Cysteine-rich flanking r…	2	-38.9	193		ENSRNOG00000005715 (mmu-miR-100)	hsa-mir-100 hsa-mir-15a hsa-mir-15b	hsa-mir-100 hsa-mir-15b	0016500 protein-hormone receptor activity IEA; 0007186 G-protein coupled receptor protein signaling pathway IEA; 0016021 integral to membrane IEA;	3' GUGUUCAAGCCUAGAUGCCCAA 5' hsa-mir-100 __ ||||||||.|||..|::||.|| __ 5' CACAAGUUGGGAAAUGUGGCUU 3' ENST00000227288 E:-21.709999 S:97.000000 Loc:1423 Cons: %(mmu) 95.45%(rno)	3' ACAUUUGGUACUACACGACGAU 5' hsa-mir-15b __ ..|||||:||.:||.|||||.| __ 5' CCUAAACUAUAGUG-GCUGCCA 3' ENST00000227288 E:-17.190001 S:96.000000 Loc:1476 Cons: %(mmu) 100.00%(rno)
ENST00000228226	ENSG00000110786	PTPN5	1		ENSMUSG00000030854	ENSRNOG00000013981	PROTEIN-TYROSINE PHOSPHATASE, NON-RECEPTOR TYPE 5 (EC 3.1.3.48) (PROTEIN-TYROSINE PHOSPHATASE STRIATUM-ENRICHED) (STEP) (NEURAL- SPECIFIC PROTEIN-TYROSINE PHOSPHATASE). [Source:SWISSPROT;Acc:P54829] E HUGO:9657:PTPSTEP STEP [IPR000387:Tyrosine specific protein phosphatase and dual specificity protein phosphatase; IPR000242:Tyrosine specific protein phosphatase; IPR000694:Proline-rich region; IPR0…	2	-49.47	193	ENSMUSG00000030854 (mmu-miR-293)	ENSRNOG00000013981 (mmu-miR-293)	mmu-mir-293 rno-mir-331	rno-mir-331 mmu-mir-293	0004727 prenylated protein tyrosine phosphatase activity IEA; 0016787 hydrolase activity IEA; 0006470 protein amino acid dephosphorylation TAS; 0016021 integral to membrane TAS; 0004725 protein tyrosine phosphatase activity IEA;	3' AAGAUCCUAUCCGGGUCCCCG 5' rno-mir-331 __ |.|.|||..|||||::|||.| __ 5' UGCCAGGCCAGGCCUGGGGCC 3' ENST00000228226 E:-29.190001 S:100.000000 Loc:212 Cons: 100.00%(mmu) 100.00%(rno)	3' UGUGAUGU-UUGAGACGCCGUGA 5' mmu-mir-293 __ :||.|:||.:|||||.:||||.. __ 5' GCA-UGCAUGACUCUUUGGCAAC 3' ENST00000228226 E:-20.280001 S:93.000000 Loc:843 Cons: 95.45%(mmu) 95.45%(rno)
ENST00000283201	ENSG00000153207		1		ENSMUSG00000026491	ENSRNOG00000023541	TRANSCRIPTION FACTOR ELYS. [Source:RefSeq;Acc:NM_015446] ENSG00000153207 (-1) (243949403 243950832 244041252 244041389 243676288) 1429 (1429 nt) [IPR001687:ATP/GTP-binding site motif A (P-loop); IPR000637:HMG-I and HMG-Y DNA-binding domain (A+T-hook); IPR002453:Beta tubulin;]	2	-35.59	192	ENSMUSG00000026491 (mmu-let-7e)		hsa-let-7e hsa-mir-95	hsa-mir-95	0003677 DNA binding IEA; 0008235 metalloexopeptidase activity IEA; 0006355 regulation of transcription, DNA-dependent IEA; 0006508 proteolysis and peptidolysis IEA; 0005634 nucleus IEA; 0005198 structural molecule activity IEA; 0007018 microtubule-based movement IEA; 0005874 microtubule IEA;	3' UGAUAUGUUGGAGGAUGGAGU 5' hsa-let-7e __ .:|:|::||...:|||||||| __ 5' UUUGUGUAA---UCUACCUCA 3' ENST00000283201 E:-18.450001 S:96.000000 Loc:549 Cons: 94.44%(mmu) %(rno)	3' ACGAGUUAUUUAUGGGCAAC-UU 5' hsa-mir-95 __ |..||||||||||..:||||.|| __ 5' UCAUCAAUAAAUAAGUGUUGUAA 3' ENST00000283201 E:-17.139999 S:96.000000 Loc:1026 Cons: 95.65%(mmu) %(rno)
ENST00000055682	ENSG00000050030		1		ENSMUSG00000046449	ENSRNOG00000021589	ENSG00000050030 (-1) (72820203 72826031 72832288 73011663 72701235) 5828 (5828 nt) []	2	-36.8	192	ENSMUSG00000046449 (mmu-miR-195)	ENSRNOG00000021589 (mmu-miR-195)	hsa-mir-195 hsa-mir-93	hsa-mir-93 hsa-mir-195		3' GAUGGACGUGCUUGUCGUGAAA 5' hsa-mir-93 __ |.||:|.:::|:|:|||||.|. __ 5' CCACUUAUGUGGAUAGCACCUG 3' ENST00000055682 E:-19.030001 S:99.000000 Loc:333 Cons: 90.91%(mmu) 95.45%(rno)	3' CGGUUAUAAAGACACGACGAU 5' hsa-mir-195 __ .|||:|:.||||.||||.:|| __ 5' UCCAGUGAUUCU-UGCUAUUA 3' ENST00000055682 E:-17.77 S:93.000000 Loc:307 Cons: 100.00%(mmu) 100.00%(rno)
ENST00000326870	ENSG00000132716		1		ENSMUSG00000026554	ENSRNOG00000006785	H326. [Source:RefSeq;Acc:NM_015726] ENSG00000132716 (-1) (157402297 157404174 157430590 157448771 157285055) 1877 (1877 nt) [IPR001680:G-protein beta WD-40 repeat;]	2	-39.26	192		ENSRNOG00000006785 (mmu-miR-155)	hsa-mir-155 rno-mir-7*	rno-mir-7* hsa-mir-155		3' AUACCGUCUGACACUAAACAAC 5' rno-mir-7* __ .||.|||..|||..|||||||| __ 5' CAU-GCACUCUGGAAUUUGUUG 3' ENST00000326870 E:-17.120001 S:99.000000 Loc:1819 Cons: %(mmu) 100.00%(rno)	3' GGGGAUAGUGCUAAUCGUAAUU 5' hsa-mir-155 __ :||||:||.|.||.|.::|||: __ 5' UCCCUGUCCCUAUCACUGUUAG 3' ENST00000326870 E:-22.139999 S:93.000000 Loc:784 Cons: %(mmu) 100.00%(rno)
ENST00000323630	ENSG00000100330	MTMR3	1		ENSMUSG00000034354	ENSRNOG00000007120	MYOTUBULARIN-RELATED PROTEIN 3 (EC 3.1.3.48) (FYVE DOMAIN-CONTAINING DUAL SPECIFICITY PROTEIN PHOSPHATASE 1) (FYVE-DSP1). [Source:SWISSPROT;Acc:Q13615] ENSG00000100330 (1) (28603753 28691588 28746344 HUGO:7451:FYVE-DSP1 KIAA0371 ZFYVE10 [IPR000387:Tyrosine specific protein phosphatase and dual specificity protein phosphatase; IPR000306:Zn-finger, FYVE type;]	2	-39.41	191	ENSMUSG00000034354 (mmu-miR-100)		hsa-mir-100 rno-mir-151 rno-mir-326	rno-mir-151 hsa-mir-100	0004727 prenylated protein tyrosine phosphatase activity IEA; 0008138 protein tyrosine/serine/threonine phosphatase activity TAS; 0016787 hydrolase activity IEA; 0006470 protein amino acid dephosphorylation TAS; 0005737 cytoplasm TAS; 0016020 membrane TAS;	3' GGAGUUCCUCGGAGUCAGAUCA 5' rno-mir-151 __ |||||:.||||:|::.|.|:|| __ 5' CCUCAGUGAGCUUUGAUAUGGU 3' ENST00000323630 E:-21.549999 S:98.000000 Loc:1239 Cons: 90.91%(mmu) %(rno)	3' GUGUUCAAGCCUAGAUGCCCAA 5' hsa-mir-100 __ .|.|:|||..||..|||||||| __ 5' AAGAGGUUAUGA--UACGGGUU 3' ENST00000323630 E:-17.860001 S:93.000000 Loc:1779 Cons: 100.00%(mmu) %(rno)
ENST00000328923	ENSG00000182199	SHMT2	1		ENSMUSG00000025403	ENSRNOG00000008106	SERINE HYDROXYMETHYLTRANSFERASE, MITOCHONDRIAL PRECURSOR (EC 2.1.2.1) (SERINE METHYLASE) (GLYCINE HYDROXYMETHYLTRANSFERASE) (SHMT). [Source:SWISSPROT;Acc:P34897] ENSG00000182199 (1) (55909819 55909829 HUGO:10852:SHMT [IPR001085:Glycine hydroxymethyltransferase;]	2	-37.39	190	ENSMUSG00000025403 (mmu-let-7e)	ENSRNOG00000008106 (mmu-miR-218)	hsa-let-7e hsa-mir-218	hsa-mir-218	0004372 glycine hydroxymethyltransferase activity IEA; 0016740 transferase activity IEA; 0006544 glycine metabolism IEA; 0006563 L-serine metabolism IEA; 0006730 one-carbon compound metabolism IEA; 0005739 mitochondrion TAS;	3' UGAUAUGUUGGAGGAUGGAGU 5' hsa-let-7e __ :.||.:||.||||||.|||.. __ 5' GGUAGGCACCCUCCUUCCUGU 3' ENST00000328923 E:-17.07 S:95.000000 Loc:320 Cons: 90.48%(mmu) %(rno)	3' UGUACCAAUCUAGUUCGUGUU 5' hsa-mir-218 __ ||:||.||..|.||:||:||: __ 5' ACGUGAUU--AGCAGGCGCAG 3' ENST00000328923 E:-20.32 S:95.000000 Loc:518 Cons: 100.00%(mmu) 100.00%(rno)
ENST00000237473	ENSG00000118655	DCLRE1B	1		ENSMUSG00000027845	ENSRNOG00000019367	DNA CROSS-LINK REPAIR 1B (PSO2 HOMOLOG, S. CEREVISIAE). [Source:RefSeq;Acc:NM_022836] ENSG00000118655 (1) (113746765 113746936 113753540 113755419 113781734) 1879 (1879 nt) HUGO:17641:FLJ12810 FLJ13998 SNM1B [IPR001279:Beta-lactamase-like;]	2	-50.84	190	ENSMUSG00000027845 (mmu-miR-222)	ENSRNOG00000019367 (mmu-miR-214)	hsa-mir-214 hsa-mir-222	hsa-mir-214 hsa-mir-222		3' GACGGACAGACACGGACGACA 5' hsa-mir-214 __ :|.|||||||.|||||.|||. __ 5' UUUCCUGUCUCUGCCU-CUGG 3' ENST00000237473 E:-25.73 S:97.000000 Loc:554 Cons: %(mmu) 90.00%(rno)	3' CUCUGGGUCAUCGGUCUACAUCGA 5' hsa-mir-222 __ ||||||.||.||||||.||..||. __ 5' GAGACCAAGGAGCCAGCUG--GCG 3' ENST00000237473 E:-25.110001 S:93.000000 Loc:934 Cons: 90.91%(mmu) 90.91%(rno)
ENST00000284601	ENSG00000154415	PPP1R3A	1		ENSMUSG00000042717	ENSRNOG00000021567	PROTEIN PHOSPHATASE 1, REGULATORY (INHIBITOR) SUBUNIT 3 (GLYCOGEN AND SARCOPLASMIC RETICULUM BINDING SUBUNIT, SKELETAL MUSCLE). [Source:RefSeq;Acc:NM_002711] ENSG00000154415 (-1) (113068889 113072281 HUGO:9291:PPP1R3 [IPR005036:Putative phosphatase regulatory subunit; IPR001752:Kinesin, motor region;]	2	-36.11	189	ENSMUSG00000042717 (mmu-miR-103)	ENSRNOG00000021567 (mmu-miR-103)	hsa-mir-103 rno-mir-322	hsa-mir-103 rno-mir-322	0000158 protein phosphatase type 2A activity IEA; 0004723 calcium-dependent protein serine/threonine phosphatase activity IEA; 0004724 magnesium-dependent protein serine/threonine phosphatase activity IEA; 0004865 type 1 serine/threonine specific protein phosphatase inhibitor activity NR; 0008420 CTD phosphatase activity IEA; 0015071 protein phosphatase type 2C activity IEA; 0016787 hydrolase act…	3' AGUAUCGGGACAUGUU-ACGACGA 5' hsa-mir-103 __ |::.|.::..|||||:.||:|||| __ 5' UUGAAAUUAGGUACAGCUGUUGCU 3' ENST00000284601 E:-17.540001 S:98.000000 Loc:231 Cons: 91.67%(mmu) 91.67%(rno)	3' ACAACGUCGCGAAGUACAAA 5' rno-mir-322 __ .||||||.:||||||..|.| __ 5' AGUUGCAAUGCUUCACAUCU 3' ENST00000284601 E:-18.57 S:91.000000 Loc:272 Cons: %(mmu) 95.00%(rno)
ENST00000261312	ENSG00000092148	HECTD1	1		ENSMUSG00000035247	ENSRNOG00000028147	HECT DOMAIN CONTAINING PROTEIN 1 (FRAGMENT). [Source:SWISSPROT;Acc:Q9ULT8] ENSG00000092148 (-1) (29559363 29560175 29595910 29595912 28386758) 812 (812 nt) HUGO:20157:KIAA1131 [IPR000569:HECT domain (Ubiquitin-protein ligase);]	2	-38.4	183	ENSMUSG00000035247 (mmu-miR-187)	ENSRNOG00000028147 (mmu-miR-187)	hsa-mir-187 hsa-mir-214	hsa-mir-187 hsa-mir-214	0004842 ubiquitin-protein ligase activity IEA; 0004872 receptor activity IEA; 0016874 ligase activity IEA; 0006512 ubiquitin cycle IEA; 0005622 intracellular IEA;	3' GCCGACGUUGUGUUCUGUGCU 5' hsa-mir-187 __ :||:...|:::||||:|||.. __ 5' UGGUCUAAGUGCAAGGCACAC 3' ENST00000261312 E:-18.65 S:92.000000 Loc:662 Cons: 90.48%(mmu) 95.24%(rno)	3' GACGGACAGACACGGACGACA 5' hsa-mir-214 __ ..||||.|.||||::||.||| __ 5' AAGCCUCU-UGUGUUUG-UGU 3' ENST00000261312 E:-19.75 S:91.000000 Loc:49 Cons: 100.00%(mmu) %(rno)
ENST00000248706	ENSG00000128045		1		ENSMUSG00000049907	ENSRNOG00000002097	ENSG00000128045 (1) (53644026 53644217 53647514 53648537 54159381) 1023 (1023 nt) [IPR001687:ATP/GTP-binding site motif A (P-loop); IPR001806:Ras GTPase superfamily;]	1	-22.65	123	ENSMUSG00000049907 (mmu-miR-18)	ENSRNOG00000002097 (mmu-miR-18)	hsa-mir-18 hsa-mir-20	hsa-mir-18	0003925 small monomeric GTPase activity IEA; 0005525 GTP binding IEA; 0007264 small GTPase mediated signal transduction IEA;	3' AUAGACGUGAUCUACGUGGAAU 5' hsa-mir-18 __ ...||.|||.||||||||:||| __ 5' CCCCUCCAC-AGAUGCACUUUA 3' ENST00000248706 E:-22.65 S:123.000000 Loc:940 Cons: 95.24%(mmu) 95.24%(rno)
ENST00000300134	ENSG00000166888	STAT6	1		ENSMUSG00000002147	ENSRNOG00000025023	SIGNAL TRANSDUCER AND ACTIVATOR OF TRANSCRIPTION 6 (IL-4 STAT). [Source:SWISSPROT;Acc:P42226] ENSG00000166888 (-1) (55775462 55776622 55788328 55791428 55758751) 1160 (1160 nt) HUGO:11368:D12S1644 IL-4-STAT [IPR000980:SH2 motif; IPR001217:STAT protein;]	1	-21.45	122	ENSMUSG00000002147 (mmu-miR-297)		mmu-mir-297	mmu-mir-297	0003700 transcription factor activity TAS; 0004871 signal transducer activity IEA; 0006357 regulation of transcription from Pol II promoter TAS; 0007242 intracellular signaling cascade IEA; 0005634 nucleus IEA;	3' GUACGUGUACGUGUGUAUGUA 5' mmu-mir-297 __ ||.|||||..||||||||||. __ 5' CACGCACA--CACACAUACAG 3' ENST00000300134 E:-21.450001 S:122.000000 Loc:288 Cons: 94.74%(mmu) %(rno)
ENST00000284224	ENSG00000154080	CHST9	1		ENSMUSG00000047161	ENSRNOG00000015867	GALNAC-4-SULFOTRANSFERASE 2; N-ACETYLGALACTOSAMINE 4-O-SULFOTRANSFERASE 2. [Source:RefSeq;Acc:NM_031422] ENSG00000154080 (-1) (22747589 22748210 22974760 23017166 22697680) 621 (621 nt) HUGO:19898:GALNAC-4-ST2 GALNAC4ST-2 [IPR005331:Chondroitin 4-O-sulfotransferase;]	1	-24.37	122	ENSMUSG00000047161 (mmu-miR-300)		mmu-mir-300	mmu-mir-300	0001537 N-acetylgalactosamine 4-O-sulfotransferase activity NAS; 0016740 transferase activity IEA; 0030203 glycosaminoglycan metabolism NAS; 0008372 cellular_component unknown ND;	3' CUUCUCUCGAACGGGAACGUAU 5' mmu-mir-300 __ |||.|||||.|||::||||||. __ 5' GAAAAGAGC-UGCUUUUGCAUU 3' ENST00000284224 E:-24.370001 S:122.000000 Loc:219 Cons: 90.48%(mmu) %(rno)
ENST00000160373	ENSG00000077063	CORTBP2	1		ENSMUSG00000000416	ENSRNOG00000008440	CORTACTIN BINDING PROTEIN 2; CORTACTIN-BINDING PROTEIN 2; CHROMOSOME 7 OPEN READING FRAME 8. [Source:RefSeq;Acc:NM_033427] ENSG00000077063 (-1) (116905211 116906094 117067972 117067972 116696131) 883 HUGO:15679:C7orf8 HGNC:1351 KIAA1758 Orf4 [IPR001064:Beta and gamma crystallin; IPR002110:Ankyrin; IPR001472:Bipartite nuclear localization signal;]	1	-17.98	119		ENSRNOG00000008440 (mmu-miR-365-1)	hsa-mir-365-1	hsa-mir-365-1		3' UAUUCCUAAAAAUCCCCGUAAU 5' hsa-mir-365-1 __ ||.|.|||.||.|||||:|||| __ 5' AUCAAGAUGUUCAGGGGUAUUA 3' ENST00000160373 E:-17.98 S:119.000000 Loc:271 Cons: %(mmu) 90.91%(rno)
ENST00000315531_P	ENSG00000177606	JUN	1		ENSMUSG00000052684	ENSRNOG00000026293	TRANSCRIPTION FACTOR AP-1 (ACTIVATOR PROTEIN 1) (AP1) (PROTO-ONCOGENE C-JUN) (V-JUN AVIAN SARCOMA VIRUS 17 ONCOGENE HOMOLOG) (P39). [Source:SWISSPROT;Acc:P05412] ENSG00000177606 (-1) (58617664 5861766 HUGO:6204: [IPR004827:Basic-leucine zipper (bZIP) transcription factor; IPR002112:Transcription factor Jun; IPR005643:Jun-like transcription factor;]	1	-21.72	119	ENSMUSG00000052684 (mmu-miR-297)		mmu-mir-297	mmu-mir-297	0003700 transcription factor activity TAS; 0003702 RNA polymerase II transcription factor activity TAS; 0006355 regulation of transcription, DNA-dependent IEA; 0008151 cell growth and/or maintenance IEA; 0000228 nuclear chromosome TAS;	3' GUACGUGUACGUGUGUAUGUA 5' mmu-mir-297 __ ::||:|::|.||:|:|||:|| __ 5' UGUGUAUGUACAUAUAUAUAU 3' ENST00000315531_P E:-21.719999 S:119.000000 Loc:511 Cons: 95.24%(mmu) %(rno)
ENST00000239223	ENSG00000120129	DUSP1	1		ENSMUSG00000024190	ENSRNOG00000003977	DUAL SPECIFICITY PROTEIN PHOSPHATASE 1 (EC 3.1.3.48) (EC 3.1.3.16) (MAP KINASE PHOSPHATASE-1) (MKP-1) (PROTEIN-TYROSINE PHOSPHATASE CL100) (DUAL SPECIFICITY PROTEIN PHOSPHATASE HVH1). [Source:SWISSPRO HUGO:3064:CL100 HVH1 MKP-1 PTPN10 [IPR000387:Tyrosine specific protein phosphatase and dual specificity protein phosphatase; IPR001763:Rhodanese-like; IPR000340:Dual specificity protein phosphatase;]	1	-28.1	119	ENSMUSG00000024190 (mmu-miR-122a)	ENSRNOG00000003977 (mmu-miR-122a)	hsa-mir-122a	hsa-mir-122a	0000158 protein phosphatase type 2A activity IEA; 0004723 calcium-dependent protein serine/threonine phosphatase activity IEA; 0004724 magnesium-dependent protein serine/threonine phosphatase activity IEA; 0004726 non-membrane spanning protein tyrosine phosphatase activity TAS; 0008420 CTD phosphatase activity IEA; 0015071 protein phosphatase type 2C activity IEA; 0016787 hydrolase activity IEA; …	3' UGUUUGUGGUAACAGUGUGAGGU 5' hsa-mir-122a __ |||||:::|||||||.:|||||. __ 5' ACAAAUGUCAUUGUC-UACUCCU 3' ENST00000239223 E:-28.1 S:119.000000 Loc:398 Cons: 95.45%(mmu) 95.45%(rno)
ENST00000310805	ENSG00000174483	DPP3	1		ENSMUSG00000006464	ENSRNOG00000005489	DIPEPTIDYL-PEPTIDASE III (EC 3.4.14.4) (DPP III) (DIPEPTIDYL AMINOPEPTIDASE III) (DIPEPTIDYL ARYLAMIDASE III). [Source:SWISSPROT;Acc:Q9NY33] ENSG00000174483 (1) (66023255 66025032 66052082 66052484 66 HUGO:966:FLJ23590 [IPR005317:Peptidase family M49;]	1	-20.54	118	ENSMUSG00000006464 (mmu-miR-106b)	ENSRNOG00000005489 (mmu-miR-106b)	hsa-mir-106b hsa-mir-17_5p	hsa-mir-106b	0004177 aminopeptidase activity IEA; 0008237 metallopeptidase activity IEA; 0008239 dipeptidyl-peptidase activity TAS; 0016787 hydrolase activity IEA; 0017039 dipeptidyl-peptidase III activity IEA; 0006508 proteolysis and peptidolysis TAS; 0005737 cytoplasm IEA;	3' UAGACGU-GACAGUCGUGAAAU 5' hsa-mir-106b __ ..:|.||.:||||||||||||. __ 5' CCUUCCAUUUGUCAGCACUUUC 3' ENST00000310805 E:-20.540001 S:118.000000 Loc:146 Cons: 90.91%(mmu) 95.45%(rno)
ENST00000233025	ENSG00000114902		1		ENSMUSG00000021917	ENSRNOG00000018075	MICROSOMAL SIGNAL PEPTIDASE 12 KDA SUBUNIT (EC 3.4.-.-) (SPASE 12 KDA SUBUNIT) (SPC12) (HSPC033). [Source:SWISSPROT;Acc:Q9Y6A9] ENSG00000114902 (1) (52697469 52697470 52699176 52699530 52768957) 354 ( []	1	-26.1	118	ENSMUSG00000021917 (mmu-miR-24)		hsa-mir-24 hsa-mir-320	hsa-mir-24	0005554 molecular_function unknown ND; 0008233 peptidase activity IEA; 0006508 proteolysis and peptidolysis TAS; 0005787 signal peptidase complex TAS; 0005792 microsome IEA; 0030176 integral to endoplasmic reticulum membrane IDA;	3' GACAAGGACGACUUGACUCGGU 5' hsa-mir-24 __ :||||:|||.|||:.|||||:| __ 5' UUGUUUCUG-UGAGAUGAGCUA 3' ENST00000233025 E:-26.1 S:118.000000 Loc:25 Cons: 90.48%(mmu) %(rno)
ENST00000294304	ENSG00000162337	LRP5	1		ENSMUSG00000024913	ENSRNOG00000015911	LOW DENSITY LIPOPROTEIN RECEPTOR-RELATED PROTEIN 5; LOW DENSITY LIPOPROTEIN RECEPTOR-RELATED PROTEIN 7; OSTEOPOROSIS PSEUDOGLIOMA SYNDROME. [Source:RefSeq;Acc:NM_002335] ENSG00000162337 (1) (67855461 HUGO:6697:BMND1 HBM HGNC:8152 LR3 LRP7 OPPG OPS [IPR002172:Low density lipoprotein-receptor, class A; IPR006209:EGF-like domain; IPR000033:Low-density lipoprotein receptor, YWTD repeat;]	1	-23	117	ENSMUSG00000024913 (mmu-miR-207)		mmu-mir-207 mmu-mir-291_3p rno-mir-328	mmu-mir-291_3p	0004872 receptor activity IEA; 0016020 membrane IEA; 0006629 lipid metabolism TAS; 0007165 signal transduction NR; 0008284 positive regulation of cell proliferation TAS; 0016021 integral to membrane TAS;	3' CCGUGUGUUUC-ACCUUCGUGAAA 5' mmu-mir-291_3p __ ||::.:||::|.|||:||.||||| __ 5' GGUGGGCAGGGCUGGGAGAACUUU 3' ENST00000294304 E:-23 S:117.000000 Loc:137 Cons: 91.67%(mmu) %(rno)
ENST00000256257	ENSG00000133874	RNF122	1		ENSMUSG00000039328	ENSRNOG00000023473	ENSG00000133874 (-1) (33462941 33463939 33481909 33482311 33428222) 998 (998 nt) HUGO:21147:FLJ12526 [IPR001841:Zn-finger, RING;]	1	-19.82	116	ENSMUSG00000039328 (mmu-miR-122a)	ENSRNOG00000023473 (mmu-miR-122a)	hsa-mir-122a	hsa-mir-122a		3' UGUUUGUGGUAACAGUGUGAGGU 5' hsa-mir-122a __ ::|||:|.:|||.|:|:|||:|| __ 5' GUAAAUAGUAUUUUUAUACUUCA 3' ENST00000256257 E:-19.82 S:116.000000 Loc:834 Cons: 100.00%(mmu) 95.65%(rno)
ENST00000303697	ENSG00000170959		1		ENSMUSG00000042649	ENSRNOG00000022178	ENSG00000170959 (-1) (30849463 30869297 30892569 30892569 30572847) 3443 (3443 nt) [IPR001687:ATP/GTP-binding site motif A (P-loop); IPR003533:Doublecortin;]	1	-24.42	116	ENSMUSG00000042649 (mmu-miR-122a)		hsa-mir-122a	hsa-mir-122a	0007242 intracellular signaling cascade IEA;	3' UGUUUGUGGUA--ACAGUGUGAGGU 5' hsa-mir-122a __ |||:|||:::|..||||||..|||| __ 5' ACAGACAUUGUGGUGUCACCAUCCA 3' ENST00000303697 E:-24.42 S:116.000000 Loc:1617 Cons: 92.00%(mmu) %(rno)
ENST00000290551	ENSG00000159388	BTG2	1		ENSMUSG00000041551	ENSRNOG00000003300	BTG2 PROTEIN (NGF-INDUCIBLE ANTI-PROLIFERATIVE PROTEIN PC3). [Source:SWISSPROT;Acc:P78543] ENSG00000159388 (1) (200562921 200562992 200564823 200566984 200773123) 2161 (2161 nt) HUGO:1131:PC3 TIS21 [IPR002087:Anti-proliferative protein;]	1	-19.18	115	ENSMUSG00000041551 (mmu-miR-27b)	ENSRNOG00000003300 (mmu-miR-27b)	hsa-mir-27b	hsa-mir-27b	0003700 transcription factor activity NR; 0006281 DNA repair TAS; 0008285 negative regulation of cell proliferation TAS;	3' GUCUUGAAUCGGUGACACUU 5' hsa-mir-27b __ ||.|:.|||||.|||||||| __ 5' CA-AGGUUAGCAACUGUGAA 3' ENST00000290551 E:-19.18 S:115.000000 Loc:349 Cons: 100.00%(mmu) 100.00%(rno)
ENST00000262464	ENSG00000138829	FBN2	1		ENSMUSG00000024598	ENSRNOG00000022901	FIBRILLIN 2 PRECURSOR. [Source:SWISSPROT;Acc:P35556] ENSG00000138829 (-1) (127669945 127671363 127949512 127949512 126924749) 1418 (1418 nt) HUGO:3604:CCA [IPR000152:Aspartic acid and asparagine hydroxylation site; IPR006209:EGF-like domain; IPR001881:EGF-like calcium-binding; IPR001438:Type II EGF-like signature; IPR002212:Matrix fibril-associated; IPR006149:Nematode-specific EB region; IPR00069…	1	-17.84	114	ENSMUSG00000024598 (mmu-let-7c)	ENSRNOG00000022901 (mmu-let-7c)	hsa-let-7c hsa-let-7a hsa-let-7b hsa-let-7f hsa-let-7e hsa-mir-122a	hsa-mir-122a	0005201 extracellular matrix structural constituent TAS; 0005509 calcium ion binding IEA; 0007345 embryogenesis and morphogenesis TAS; 0007397 histogenesis and organogenesis TAS; 0005578 extracellular matrix TAS;	3' UGUUUGUGGUAACAGUGUGAGGU 5' hsa-mir-122a __ |:.||:||::|.||:|:||.||| __ 5' AUUAAUACUGUAGUUAUACACCA 3' ENST00000262464 E:-17.84 S:114.000000 Loc:1092 Cons: 100.00%(mmu) 95.65%(rno)
ENST00000282606	ENSG00000152700	SARA2	1		ENSMUSG00000020386	ENSRNOG00000004820	GTP-BINDING PROTEIN SAR1B. [Source:SWISSPROT;Acc:Q9Y6B6] ENSG00000152700 (-1) (134018336 134018856 134035925 134044741 133823806) 520 (520 nt) HUGO:10535:2310075M17Rik [IPR001687:ATP/GTP-binding site motif A (P-loop); IPR006687:GTP-binding protein SAR1; IPR006689:ARF/SAR superfamily; IPR001806:Ras GTPase superfamily;]	1	-19.49	114	ENSMUSG00000020386 (mmu-miR-291_3p)		mmu-mir-291_3p hsa-mir-302	mmu-mir-291_3p	0003925 small monomeric GTPase activity IEA; 0005525 GTP binding IEA; 0008565 protein transporter activity IEA; 0006886 intracellular protein transport IEA; 0007264 small GTPase mediated signal transduction IEA; 0005783 endoplasmic reticulum IEA; 0005794 Golgi apparatus IEA;	3' CCGUGUGUUUCACCUUCGUGAAA 5' mmu-mir-291_3p __ .|||.::|.|.|.|||||||||| __ 5' AGCA-GUACAUUUGAAGCACUUU 3' ENST00000282606 E:-19.49 S:114.000000 Loc:279 Cons: 95.45%(mmu) %(rno)
ENST00000301731	ENSG00000167971	RNPS1	1		ENSMUSG00000034681	ENSRNOG00000008703	RNA-BINDING PROTEIN S1, SERINE-RICH DOMAIN; SR PROTEIN. [Source:RefSeq;Acc:NM_006711] ENSG00000167971 (-1) (2243042 2243889 2254255 2258026 2241500) 847 (847 nt) HUGO:10080: [IPR000504:RNA-binding region RNP-1 (RNA recognition motif); IPR001472:Bipartite nuclear localization signal; IPR000694:Proline-rich region;]	1	-21.37	114	ENSMUSG00000034681 (mmu-miR-106b)	ENSRNOG00000008703 (mmu-miR-106b)	hsa-mir-106b	hsa-mir-106b	0003676 nucleic acid binding IEA; 0003723 RNA binding TAS; 0006350 transcription TAS; 0008380 RNA splicing TAS; 0005634 nucleus TAS;	3' UAGACGUGACAGUCGUGAAAU 5' hsa-mir-106b __ ..:||:||.|||||:|||.|| __ 5' CAUUGUACAGUCAGUACUAUA 3' ENST00000301731 E:-21.370001 S:114.000000 Loc:712 Cons: 95.24%(mmu) 90.48%(rno)
ENST00000263895	ENSG00000115963	ARHE	1		ENSMUSG00000017144	ENSRNOG00000004624	RHO-RELATED GTP-BINDING PROTEIN RHOE (RHO8) (RND3). [Source:SWISSPROT;Acc:P52199] ENSG00000115963 (-1) (151527257 151529046 151546476 151546709 150917666) 1789 (1789 nt) HUGO:671:Rho8 RhoE [IPR001687:ATP/GTP-binding site motif A (P-loop); IPR001230:Prenyl group binding site (CAAX box); IPR001806:Ras GTPase superfamily;]	1	-24.61	114	ENSMUSG00000017144 (mmu-miR-27a)	ENSRNOG00000004624 (rno-miR-324_5p)	hsa-mir-27a rno-mir-324_5p	rno-mir-324_5p	0003931 Rho small monomeric GTPase activity TAS; 0005525 GTP binding TAS; 0007155 cell adhesion TAS; 0007264 small GTPase mediated signal transduction IEA; 0030036 actin cytoskeleton organization and biogenesis TAS;	3' UGU-GGUUACGGGAUCCCCUACGC 5' rno-mir-324_5p __ :||.::|:|.::||||.|||||:| __ 5' GCAUUUAGUUUUCUAGAGGAUGUG 3' ENST00000263895 E:-24.610001 S:114.000000 Loc:459 Cons: %(mmu) 91.67%(rno)
ENST00000294384_P	ENSG00000171680	TNFRSF25	1		ENSMUSG00000024793	ENSRNOG00000021814	TUMOR NECROSIS FACTOR RECEPTOR SUPERFAMILY MEMBER 25 PRECURSOR (WSL-1 PROTEIN) (APOPTOSIS-MEDIATING RECEPTOR DR3) (APOPTOSIS- MEDIATING RECEPTOR TRAMP) (DEATH DOMAIN RECEPTOR 3) (WSL PROTEIN) (APOPTOS HUGO:11910:APO-3 DDR3 DR3 LARD TNFRSF12 TR3 TRAMP WSL-1 WSL-LR [IPR001368:TNFR/CD27/30/40/95 cysteine-rich region; IPR006209:EGF-like domain; IPR000488:Death domain;]	1	-26.77	113		ENSRNOG00000021814 (mmu-miR-30a)	hsa-mir-30a	hsa-mir-30a	0004872 receptor activity NAS; 0005027 NGF/TNF (6 C-domain) receptor activity TAS; 0005554 molecular_function unknown ND; 0016329 apoptosis regulator activity NAS; 0007166 cell surface receptor linked signal transduction TAS; 0008624 induction of apoptosis by extracellular signals TAS; 0005829 cytosol NAS; 0005887 integral to plasma membrane TAS; 0008372 cellular_component unknown ND;	3' CGA-CGUUUGUAGGCUGACUUUC 5' hsa-mir-30a __ .||.|:|||||..:||||||:|| __ 5' UCUGGUAAACAAAUGACUGAGAG 3' ENST00000294384_P E:-26.77 S:113.000000 Loc:2179 Cons: %(mmu) 95.65%(rno)
ENST00000280170	ENSG00000119866	BCL11A	1		ENSMUSG00000000861	ENSRNOG00000007049	B-CELL CLL/LYMPHOMA 11A ISOFORM 2; ECOTROPIC VIRAL INTEGRATION SITE 9 HOMOLOG; C2H2-TYPE ZINC FINGER PROTEIN. [Source:RefSeq;Acc:NM_018014] ENSG00000119866 (-1) (60652836 60654244 60754939 60755151 58 HUGO:13221:BCL11A-L BCL11A-S BCL11A-XL Evi9 HGNC:3502 [IPR007087:Zn-finger, C2H2 type;]	1	-18.05	112	ENSMUSG00000000861 (mmu-miR-206)	ENSRNOG00000007049 (mmu-miR-206)	hsa-mir-206	hsa-mir-206		3' GGUGUGUGAAGGAAUGUAAGGU 5' hsa-mir-206 __ ||.|.:::|||:.|||||||:| __ 5' CCCCUUGUUUCUAUACAUUCUA 3' ENST00000280170 E:-18.049999 S:112.000000 Loc:341 Cons: 100.00%(mmu) 95.45%(rno)
ENST00000265872	ENSG00000060339		1		ENSMUSG00000020074	ENSRNOG00000000397	ENSG00000060339 (1) (69825574 69826865 69895626 69895910 69989680) 284 (284 nt) [IPR003034:DNA-binding SAP;]	1	-18.01	111		ENSRNOG00000000397 (mmu-miR-29c)	hsa-mir-29c hsa-mir-29b	hsa-mir-29b	0003677 DNA binding IEA; 0005634 nucleus IEA;	3' UGACUAAAGUUUACCACGAU 5' hsa-mir-29b __ |.||||...:|||||||:|| __ 5' AGUGAUGAGGAAUGGUGUUA 3' ENST00000265872 E:-18.01 S:111.000000 Loc:12 Cons: %(mmu) 90.00%(rno)
ENST00000278819	ENSG00000089006	SNX5	1		ENSMUSG00000027423	ENSRNOG00000006077	SORTING NEXIN 5. [Source:SWISSPROT;Acc:Q9Y5X3] ENSG00000089006 (-1) (17917244 17918001 17944158 17944159 17657722) 757 (757 nt) HUGO:14969: [IPR001683:Phox-like;]	1	-19.96	111	ENSMUSG00000027423 (mmu-let-7d)		hsa-let-7d		0008565 protein transporter activity IEA; 0006886 intracellular protein transport IEA; 0006899 nonselective vesicle transport TAS; 0007242 intracellular signaling cascade IEA;	3' UGAUACGUUGGAUGAUGGAGA 5' hsa-let-7d __ .:|:|||.|::||.||||||| __ 5' CUUGUGC-AUUUAAUACCUCU 3' ENST00000278819 E:-19.959999 S:111.000000 Loc:205 Cons: 90.00%(mmu) %(rno)
ENST00000305409	ENSG00000171951	SCG2	1		ENSMUSG00000050711	ENSRNOG00000015055	SECRETOGRANIN II PRECURSOR (SGII) (CHROMOGRANIN C). [Source:SWISSPROT;Acc:P13521] ENSG00000171951 (-1) (224664201 224664686 224666539 224669664 223723345) 485 (485 nt) HUGO:10575:CHGC [IPR001990:Chromogranin/secretogranin;]	1	-23.75	111	ENSMUSG00000050711 (mmu-miR-148b)	ENSRNOG00000015055 (rno-miR-148b)	rno-mir-148b hsa-mir-148 mmu-mir-148a	rno-mir-148b	0005509 calcium ion binding IEA; 0009306 protein secretion TAS; 0005803 secretory vesicle TAS;	3' UGUUUCAAGACACUACGUGACU 5' rno-mir-148b __ ::|:.|||:||||:.|:||||: __ 5' GUAGUGUUUUGUGGAGUACUGG 3' ENST00000305409 E:-23.75 S:111.000000 Loc:370 Cons: 95.45%(mmu) 95.45%(rno)
ENST00000225525	ENSG00000108392		1		ENSMUSG00000040158	ENSRNOG00000019357	TAX INTERACTION PROTEIN 1. [Source:RefSeq;Acc:NM_014604] ENSG00000108392 (-1) (3772780 3773632 3778410 3778566 3746207) 852 (852 nt) [IPR001478:PDZ/DHR/GLGF domain;]	1	-28.09	111		ENSRNOG00000019357 (rno-miR-326)	rno-mir-326	rno-mir-326	0005515 protein binding IPI; 0007242 intracellular signaling cascade NAS; 0005737 cytoplasm NAS;	3' UGACC-UCCUUCCCGGGUCUCC 5' rno-mir-326 __ |:|||.|..|||||||::|||. __ 5' AUUGGAAAUAAGGGCCUGGAGC 3' ENST00000225525 E:-28.09 S:111.000000 Loc:208 Cons: %(mmu) 90.91%(rno)
ENST00000312814	ENSG00000146802		1		ENSMUSG00000029569	ENSRNOG00000006690	ENSG00000146802 (-1) (111966318 111967783 111985411 111990979 111204719) 1465 (1465 nt) []	1	-17.13	110	ENSMUSG00000029569 (mmu-miR-202)	ENSRNOG00000006690 (mmu-miR-202)	mmu-mir-202 hsa-mir-214	mmu-mir-202		3' AGAAGGGUACGCGAUAUGGAGA 5' mmu-mir-202 __ .:||::::|.:|||:||::|:| __ 5' AUUUUUUGUAUGCUGUAUUUUU 3' ENST00000312814 E:-17.129999 S:110.000000 Loc:61 Cons: 100.00%(mmu) 100.00%(rno)
ENST00000280083	ENSG00000150527	MGEA6	1		ENSMUSG00000021000	ENSRNOG00000005101	MENINGIOMA-EXPRESSED ANTIGEN 6/11 (MEA6) (MEA11). [Source:SWISSPROT;Acc:O15320] ENSG00000150527 (1) (37726389 37726703 37809507 37810434 40066812) 927 (927 nt) HUGO:7057:MEA6 MGEA []	1	-18.99	110	ENSMUSG00000021000 (mmu-miR-146)	ENSRNOG00000005101 (mmu-miR-146)	hsa-mir-146	hsa-mir-146	0005515 protein binding TAS; 0008047 enzyme activator activity TAS; 0005871 kinesin complex IEA;	3' UUGGG-UACCUUAA-GUCAAGAGU 5' hsa-mir-146 __ |:|::.||||||||.:|.|||||| __ 5' AGCUUAAUGGAAUUAUAAUUCUCA 3' ENST00000280083 E:-18.99 S:110.000000 Loc:97 Cons: 91.67%(mmu) 91.67%(rno)
ENST00000250617	ENSG00000129675	ARHGEF6	1		ENSMUSG00000031133	ENSRNOG00000000869	RHO GUANINE NUCLEOTIDE EXCHANGE FACTOR 6 (PAK-INTERACTING EXCHANGE FACTOR ALPHA) (ALPHA-PIX) (COOL-2). [Source:SWISSPROT;Acc:Q15052] ENSG00000129675 (-1) (134453323 134455795 134568648 134569110 13403 HUGO:685:alpha-PIX alphaPIX Cool-2 Cool2 HGNC:7278 KIAA0006 MRX46 [IPR001452:SH3 domain; IPR003096:SM22/calponin; IPR001849:Pleckstrin-like; IPR001715:Calponin-like actin-binding; IPR000219:DH domai…	1	-20.43	110	ENSMUSG00000031133 (mmu-miR-135)	ENSRNOG00000000869 (mmu-miR-135)	hsa-mir-135	hsa-mir-135	0005089 Rho guanyl-nucleotide exchange factor activity NAS; 0005096 GTPase activator activity NAS; 0017031 Rho interactor activity NAS; 0006915 apoptosis NAS; 0007254 JNK cascade NAS; 0005622 intracellular IC;	3' AGUGUAUCCUUAUUUUUCGGUAU 5' hsa-mir-135 __ .:|:|.|||||.|.:|||||||: __ 5' AUAUAAAGGAA-AUGAAGCCAUG 3' ENST00000250617 E:-20.43 S:110.000000 Loc:2238 Cons: 100.00%(mmu) 100.00%(rno)
ENST00000296723	ENSG00000164283	ESM1	1		ENSMUSG00000042379	ENSRNOG00000010797	ENDOTHELIAL CELL-SPECIFIC MOLECULE 1 PRECURSOR (ESM-1 SECRETORY PROTEIN) (ESM-1). [Source:SWISSPROT;Acc:Q9NQ30] ENSG00000164283 (-1) (54289581 54291045 54297230 54297230 54120529) 1390 (1390 nt) HUGO:3466: [IPR000867:Insulin-like growth factor-binding protein, IGFBP;]	1	-21.35	110	ENSMUSG00000042379 (mmu-miR-291_5p)		mmu-mir-291_5p	mmu-mir-291_5p	0005515 protein binding NAS; 0005520 insulin-like growth factor binding IEA; 0008083 growth factor activity NAS; 0000004 biological_process unknown ND; 0001558 regulation of cell growth IEA; 0005576 extracellular NAS;	3' UCUCUCCCGGAGGUGAAACUAC 5' mmu-mir-291_5p __ |||||.||.|||:|:|||.:|| __ 5' AGAGAAGG-CUCUAUUUUCGUG 3' ENST00000296723 E:-21.35 S:110.000000 Loc:18 Cons: 90.48%(mmu) %(rno)
ENST00000257604	ENSG00000135148		1		ENSMUSG00000042726	ENSRNOG00000001351	FLN29 GENE PRODUCT. [Source:RefSeq;Acc:NM_006700] ENSG00000135148 (1) (110975334 110980280 111002548 111003365 111268490) 817 (817 nt) [IPR007087:Zn-finger, C2H2 type;]	1	-24.46	110	ENSMUSG00000042726 (mmu-miR-125a)		hsa-mir-125a hsa-mir-125b	hsa-mir-125b		3' AGUGUUCAAUCCCAGAGUCCCU 5' hsa-mir-125b __ .::.::|||.||||:|.||||| __ 5' GUGGGGGUUUGGGUUUGAGGGA 3' ENST00000257604 E:-24.459999 S:110.000000 Loc:158 Cons: 90.91%(mmu) %(rno)
ENST00000302003_P	ENSG00000114026	OGG1	1		ENSMUSG00000030271	ENSRNOG00000008522	N-GLYCOSYLASE/DNA LYASE [INCLUDES: 8-OXOGUANINE DNA GLYCOSYLASE (EC 3.2.2.-); DNA-(APURINIC OR APYRIMIDINIC SITE) LYASE (EC 4.2.99.18) (AP LYASE)]. [Source:SWISSPROT;Acc:O15527] ENSG00000114026 (1) (9 HUGO:8125: [IPR000445:Helix-hairpin-helix motif; IPR003265:HhH-GPD;]	1	-25.41	110		ENSRNOG00000008522 (mmu-miR-181c)	hsa-mir-181c hsa-mir-181a rno-mir-341	rno-mir-341	0000703 pyrimidine-specific oxidized base lesion DNA N-glycosylase activity IEA; 0004519 endonuclease activity TAS; 0008534 purine-specific oxidized base lesion DNA N-glycosylase activity TAS; 0016798 hydrolase activity, acting on glycosyl bonds IEA; 0016829 lyase activity IEA; 0005975 carbohydrate metabolism IEA; 0006284 base-excision repair TAS; 0005654 nucleoplasm TAS; 0005739 mitochondrion IE…	3' UGACUGGCUGGCUGGCUAGCU 5' rno-mir-341 __ :||.||:.||||||:|:|.|| __ 5' GCUCACUCACCGACUGGUGGA 3' ENST00000302003_P E:-25.41 S:110.000000 Loc:2194 Cons: %(mmu) 95.24%(rno)
ENST00000239690	ENSG00000120526		1		ENSMUSG00000038736	ENSRNOG00000024929	CHRONIC MYELOGENOUS LEUKEMIA TUMOR ANTIGEN 66. [Source:RefSeq;Acc:NM_032869] ENSG00000120526 (-1) (110209732 110211821 110302876 110302898 109756354) 2089 (2089 nt) [IPR005307:Nuclear movement protein;]	1	-26.38	110	ENSMUSG00000038736 (mmu-miR-145)		hsa-mir-145	hsa-mir-145		3' UUCCCUAAGGACCCUUUUGACCUG 5' hsa-mir-145 __ .||.|:|.|||.|||::.|||||| __ 5' CAGUGGUACCU-GGAGGUCUGGAC 3' ENST00000239690 E:-26.379999 S:110.000000 Loc:41 Cons: 91.30%(mmu) %(rno)
ENST00000230324	ENSG00000112562	SMOC2	1		ENSMUSG00000023886	ENSRNOG00000014166	SECRETED MODULAR CALCIUM-BINDING PROTEIN 2; SMOOTH MUSCLE ASSOCIATED PROTEIN 2. [Source:RefSeq;Acc:NM_022138] ENSG00000112562 (1) (168599333 168599334 168823627 168825180 169859117) 1553 (1553 nt) HUGO:20323:SMAP2 [IPR002048:Calcium-binding EF-hand; IPR000716:Thyroglobulin type-1; IPR002350:Serine protease inhibitor, Kazal type;]	1	-19.1	109	ENSMUSG00000023886 (mmu-miR-106a)	ENSRNOG00000014166 (mmu-miR-106a)	hsa-mir-106a hsa-mir-106b hsa-mir-17_5p hsa-mir-18 hsa-mir-20	hsa-mir-106b	0005509 calcium ion binding IEA;	3' UAGACGUGACAGUCGUGAAAU 5' hsa-mir-106b __ ||:|||||..|:.|:|||||| __ 5' AUUUGCAC--UUUGUACUUUA 3' ENST00000230324 E:-19.1 S:109.000000 Loc:90 Cons: 100.00%(mmu) 100.00%(rno)
ENST00000321815	ENSG00000061676	NCKAP1	1		ENSMUSG00000027002	ENSRNOG00000007518	NCK-ASSOCIATED PROTEIN 1 (NAP 1) (P125NAP1) (MEMBRANE-ASSOCIATED PROTEIN HEM-2). [Source:SWISSPROT;Acc:Q9Y2A7] ENSG00000061676 (-1) (183992159 183992973 184105370 184105370 183934028) 814 (814 nt) HUGO:7666:Nap1 []	1	-20.51	109	ENSMUSG00000027002 (mmu-let-7g)		hsa-let-7g hsa-let-7e		0006915 apoptosis TAS; 0007417 central nervous system development TAS; 0016021 integral to membrane IEA;	3' UGACAUGUUUGAU--GAUGGAGU 5' hsa-let-7g __ |||||:.:|||||..:|||||:| __ 5' ACUGUG-GAACUAUUUUACCUUA 3' ENST00000321815 E:-20.51 S:109.000000 Loc:57 Cons: 90.91%(mmu) %(rno)
ENST00000298782	ENSG00000150403	C13orf11	1		ENSMUSG00000038497	ENSRNOG00000019346	ENSG00000150403 (1) (112102274 112102379 112151854 112152543 112187057) 689 (689 nt) HUGO:20329:B230339H12Rik FLJ20623 []	1	-21.52	108	ENSMUSG00000038497 (mmu-miR-214)	ENSRNOG00000019346 (mmu-miR-18)	hsa-mir-18 hsa-mir-214	hsa-mir-18	0015299 solute:hydrogen antiporter activity IEA; 0006885 regulation of pH IEA; 0016021 integral to membrane IEA;	3' AUA-GACGUGAUCUACGUGGAAU 5' hsa-mir-18 __ |:|..|||.||:||||::||||. __ 5' UGUGGUGC-CUGGAUGUGCCUUU 3' ENST00000298782 E:-21.52 S:108.000000 Loc:256 Cons: %(mmu) 90.91%(rno)
ENST00000278951	ENSG00000149577		1		ENSMUSG00000034908	ENSRNOG00000017871	ENSG00000149577 (1) (116587549 116587632 116604307 116605812 116607763) 532 (532 nt) []	1	-22.01	108	ENSMUSG00000034908 (mmu-miR-184)	ENSRNOG00000017871 (mmu-miR-184)	hsa-mir-184	hsa-mir-184		3' UGGGAAUAGUCAAGAGGCAGGU 5' hsa-mir-184 __ ...|||.|.||||.|||||||| __ 5' UGGCUUCUAAGUU-UCCGUCCA 3' ENST00000278951 E:-22.01 S:108.000000 Loc:176 Cons: 90.48%(mmu) 90.48%(rno)
ENST00000245551	ENSG00000125457		1		ENSMUSG00000020743	ENSRNOG00000003837	AD023 PROTEIN. [Source:RefSeq;Acc:NM_020679] ENSG00000125457 (-1) (73859436 73859944 73863399 73863435 73854805) 508 (508 nt) [IPR003890:Initiation factor eIF-4 gamma, middle;]	1	-23.16	108	ENSMUSG00000020743 (mmu-miR-151)		rno-mir-151	rno-mir-151	0003723 RNA binding IEA; 0006412 protein biosynthesis IEA;	3' GGAGUUCCUCGGAGUCAGAUCA 5' rno-mir-151 __ |||:..||.||||||||:||.. __ 5' CCUU--GGUGCCUCAGUUUACC 3' ENST00000245551 E:-23.16 S:108.000000 Loc:270 Cons: 90.00%(mmu) %(rno)
ENST00000308987	ENSG00000173207	CKS1B	1		ENSMUSG00000028044	ENSRNOG00000007248	CYCLIN-DEPENDENT KINASES REGULATORY SUBUNIT 1 (CKS-1) (SID1334) (PNAS-16 / PNAS-143). [Source:SWISSPROT;Acc:P33551] ENSG00000173207 (1) (152163966 152164014 152168045 152168516 152172624) 471 (471 nt) HUGO:19083:CKS1 ckshs1 [IPR000789:Cyclin-dependent kinase, regulatory subunit;]	1	-17.65	107	ENSMUSG00000028044 (mmu-miR-16)	ENSRNOG00000007248 (mmu-miR-16)	hsa-mir-16	hsa-mir-16	0004693 cyclin-dependent protein kinase activity IEA; 0007049 cell cycle IEA; 0000079 regulation of CDK activity TAS; 0000910 cytokinesis IEA;	3' GCGGUUAUAAA--UGCACGACGAU 5' hsa-mir-16 __ ...||.|:|||..|:||||||.|| __ 5' AUACACUGUUUGAAUGUGCUGGUA 3' ENST00000308987 E:-17.65 S:107.000000 Loc:123 Cons: 91.67%(mmu) 91.67%(rno)
ENST00000225577	ENSG00000108443	RPS6KB1	1		ENSMUSG00000020516	ENSRNOG00000003919	RIBOSOMAL PROTEIN S6 KINASE (EC 2.7.1.-) (S6K) (P70-S6K). [Source:SWISSPROT;Acc:P23443] ENSG00000108443 (1) (58444868 58444967 58498570 58499241 58701818) 671 (671 nt) HUGO:10436:STK14A [IPR000719:Protein kinase; IPR002290:Serine/Threonine protein kinase; IPR000961:Protein kinase C-terminal domain;]	1	-20.6	107	ENSMUSG00000020516 (mmu-miR-31)		hsa-mir-31	hsa-mir-31	0004674 protein serine/threonine kinase activity IEA; 0005524 ATP binding IEA; 0016740 transferase activity IEA; 0006468 protein amino acid phosphorylation IEA; 0007165 signal transduction TAS;	3' GUCGAUACGGUCGUAGAACGG 5' hsa-mir-31 __ .||.|:||:.||||||.|||. __ 5' GAGAUGUGUGAGCAUCCUGCA 3' ENST00000225577 E:-20.6 S:107.000000 Loc:46 Cons: 95.24%(mmu) %(rno)
ENST00000282893	ENSG00000152945	STK38L	1		ENSMUSG00000001630	ENSRNOG00000001828	SERINE/THREONINE KINASE 38 LIKE. [Source:RefSeq;Acc:NM_015000] ENSG00000152945 (1) (27288343 27288469 27366655 27370155 27377256) 3500 (3500 nt) HUGO:17848:KIAA0965 [IPR000719:Protein kinase; IPR002290:Serine/Threonine protein kinase; IPR001472:Bipartite nuclear localization signal;]	1	-23.74	107	ENSMUSG00000001630 (mmu-miR-130b)		hsa-mir-130b mmu-mir-297	hsa-mir-130b	0004674 protein serine/threonine kinase activity IEA; 0005524 ATP binding IEA; 0016740 transferase activity IEA; 0006468 protein amino acid phosphorylation IEA;	3' UACGGGAAAGUAGUAACGUGAC 5' hsa-mir-130b __ ||.|||||||.|.|.||||||| __ 5' AU-CCCUUUC-UAACUGCACUG 3' ENST00000282893 E:-23.74 S:107.000000 Loc:255 Cons: 90.00%(mmu) %(rno)
ENST00000318357	ENSG00000163126		1		ENSMUSG00000001144	ENSRNOG00000016151	DIABETES RELATED ANKYRIN REPEAT PROTEIN; MUSCLE ANKYRIN REPEAT PROTEIN 3. [Source:RefSeq;Acc:NM_144994] ENSG00000163126 (-1) (96988408 96990042 96994485 96994498 96890558) 1224 (1224 nt) [IPR002110:Ankyrin;]	1	-24.34	107		ENSRNOG00000016151 (mmu-miR-217)	hsa-mir-217 mmu-mir-292_3p	hsa-mir-217		3' UAGGUUAGUCAAGGACUACGUCAU 5' hsa-mir-217 __ :.|||.|||..||:||:.|||||: __ 5' GCCCACUCAACUCUUGGGGCAGUG 3' ENST00000318357 E:-24.34 S:107.000000 Loc:861 Cons: %(mmu) 91.67%(rno)
ENST00000321725	ENSG00000010327	STAB1	1		ENSMUSG00000042286	ENSRNOG00000018434	STABILIN 1. [Source:RefSeq;Acc:NM_015136] ENSG00000010327 (1) (52487840 52487842 52516841 52516978 52527970) 137 (137 nt) HUGO:18628:KIAA0246 STAB-1 [IPR006209:EGF-like domain; IPR001128:Cytochrome P450; IPR000538:Link domain; IPR002049:Laminin-type EGF-like domain; IPR000782:Beta-Ig-H3/Fasciclin domain;]	1	-28.06	107	ENSMUSG00000042286 (mmu-miR-324_5p)		rno-mir-324_5p	rno-mir-324_5p	0005198 structural molecule activity IEA; 0006118 electron transport IEA; 0007155 cell adhesion IEA; 0005540 hyaluronic acid binding IEA;	3' UGUGGUUACGGGA-UCCCCUACGC 5' rno-mir-324_5p __ |:|..::||||||.||.|||||:| __ 5' AUAAAGGUGCCCUCAGCGGAUGUG 3' ENST00000321725 E:-28.059999 S:107.000000 Loc:101 Cons: 91.67%(mmu) %(rno)
ENST00000298110_P	ENSG00000165370	GPR101	1		ENSMUSG00000036357	ENSRNOG00000027658	G PROTEIN-COUPLED RECEPTOR 101. [Source:RefSeq;Acc:NM_054021] ENSG00000165370 (-1) (134817914 134817914 134819440 134819440 134668492) 4001 (4001 nt) HUGO:14963: [IPR000276:Rhodopsin-like GPCR superfamily;]	1	-18.21	106		ENSRNOG00000027658 (hsa-miR-147)	hsa-mir-147 hsa-mir-19a	hsa-mir-19a	0001584 rhodopsin-like receptor activity IEA; 0004872 receptor activity IEA; 0007186 G-protein coupled receptor protein signaling pathway IEA; 0016021 integral to membrane IEA;	3' AGUCAAAACGUAUCUA-AACGUGU 5' hsa-mir-19a __ ||||....|||.||:|.||||||| __ 5' UCAG----GCAAAGGUGUUGCACA 3' ENST00000298110_P E:-18.209999 S:106.000000 Loc:103 Cons: %(mmu) 95.00%(rno)
ENST00000261600	ENSG00000079134	THOC1	1		ENSMUSG00000024287	ENSRNOG00000015332	NUCLEAR MATRIX PROTEIN P84. [Source:RefSeq;Acc:NM_005131] ENSG00000079134 (-1) (204527 204626 258019 258049 39558) 99 (99 nt) HUGO:19070:HPR1 P84 [IPR000488:Death domain;]	1	-19.89	106	ENSMUSG00000024287 (mmu-miR-292_5p)	ENSRNOG00000015332 (mmu-miR-292_5p)	mmu-mir-292_5p	mmu-mir-292_5p	0006396 RNA processing TAS; 0007165 signal transduction IEA; 0005634 nucleus TAS;	3' GUUUUCUCGGGGGUCAAACUCA 5' mmu-mir-292_5p __ :||:||:.||.|::||||.:|| __ 5' UAAGAGGUCCACUGGUUUUGGU 3' ENST00000261600 E:-19.889999 S:106.000000 Loc:60 Cons: 90.91%(mmu) 90.91%(rno)
ENST00000264741	ENSG00000144668	ITGA9	1		ENSMUSG00000039115	ENSRNOG00000010476	INTEGRIN ALPHA-9 PRECURSOR (INTEGRIN ALPHA-RLC). [Source:SWISSPROT;Acc:Q13797] ENSG00000144668 (1) (37454438 37454491 37821105 37821562 37863794) 457 (457 nt) HUGO:6145:RLC [IPR000413:Integrins alpha chain;]	1	-22.47	106	ENSMUSG00000039115 (mmu-miR-103)	ENSRNOG00000010476 (rno-miR-338)	hsa-mir-103 hsa-mir-107 rno-mir-338	rno-mir-338	0004872 receptor activity IEA; 0004895 cell adhesion receptor activity TAS; 0007160 cell-matrix adhesion IEA; 0007229 integrin-mediated signaling pathway IEA; 0008305 integrin complex TAS; 0016021 integral to membrane IEA;	3' AGUUGUUUUAGUGACUACGACCU 5' rno-mir-338 __ ||::.::...|||||||||||.. __ 5' UCGGAGGCCCCACUGAUGCUGUU 3' ENST00000264741 E:-22.469999 S:106.000000 Loc:94 Cons: 100.00%(mmu) 100.00%(rno)
ENST00000335790	ENSG00000166407	LMO1	1		ENSMUSG00000036111	ENSRNOG00000014629	RHOMBOTIN-1 (CYSTEINE-RICH PROTEIN TTG-1) (T-CELL TRANSLOCATION PROTEIN 1) (LIM-ONLY PROTEIN 1). [Source:SWISSPROT;Acc:P25800] ENSG00000166407 (-1) (8210170 8210472 8254490 8254491 8154882) 302 (302 n HUGO:6641:RBTN1 RHOM1 TTG1 [IPR001781:Zn-binding protein, LIM;]	1	-17.16	105	ENSMUSG00000036111 (mmu-miR-291_3p)	ENSRNOG00000014629 (mmu-miR-291_3p)	mmu-mir-291_3p mmu-mir-294	mmu-mir-291_3p	0003700 transcription factor activity TAS; 0007275 development TAS; 0008283 cell proliferation TAS;	3' CCGUGUGUUUCACCUUCGUGAAA 5' mmu-mir-291_3p __ .|:|:|:|||.|||:|.||:||. __ 5' UGUAUAUAAA-UGGGAACAUUUA 3' ENST00000335790 E:-17.16 S:105.000000 Loc:222 Cons: 100.00%(mmu) 100.00%(rno)
ENST00000264622	ENSG00000114746		1		ENSMUSG00000027806	ENSRNOG00000011370	ENSG00000114746 (1) (151447697 151449904 151497332 151498522 151585428) 1190 (1190 nt) [IPR000580:TSC-22 / Dip / Bun family; IPR003072:Orphan nuclear receptor, NOR1 type;]	1	-19.34	105	ENSMUSG00000027806 (mmu-let-7e)	ENSRNOG00000011370 (mmu-let-7e)	hsa-let-7e		0003700 transcription factor activity IEA; 0006355 regulation of transcription, DNA-dependent IEA;	3' UGAUAUGUUGGAGG-AUGGAGU 5' hsa-let-7e __ .:|:.||.||:|:|.||||||| __ 5' UUUGAACCACUUUCGUACCUCA 3' ENST00000264622 E:-19.34 S:105.000000 Loc:1055 Cons: 95.45%(mmu) 95.45%(rno)
ENST00000337755	ENSG00000161013	MGAT4B	1		ENSMUSG00000036620	ENSRNOG00000003235	MANNOSYL (ALPHA-1,3-)-GLYCOPROTEIN BETA-1,4-N-ACETYLGLUCOSAMINYLTRANSFERASE, ISOENZYME B ISOFORM 1; UDP-N-ACETYLGLUCOSAMINE: ALPHA-1,3-D-MANNOSIDE BETA-1,4-N-ACETYLGLUCOSAMINYLTRANSFERASE IV; ALPHA-1, HUGO:7048:GnT-Ivb [IPR006759:Glycosyl transferase, family 55;]	1	-21.46	105		ENSRNOG00000003235 (mmu-miR-202)	mmu-mir-202	mmu-mir-202	0008454 alpha-1,3-mannosylglycoprotein 4-beta-N-acetylglucosaminyltransferase activity TAS; 0016758 transferase activity, transferring hexosyl groups IEA; 0005975 carbohydrate metabolism IEA; 0006491 N-glycan processing TAS; 0016020 membrane IEA;	3' AGAAG-GGUACGCGAUAUGGAGA 5' mmu-mir-202 __ .||.|.::|||:|||:|:::|:| __ 5' ACUACUUUAUGUGCUGUGUUUUU 3' ENST00000337755 E:-21.459999 S:105.000000 Loc:330 Cons: %(mmu) 95.65%(rno)
ENST00000277865	ENSG00000148672	GLUD1	1		ENSMUSG00000021794	ENSRNOG00000010222	GLUTAMATE DEHYDROGENASE 1, MITOCHONDRIAL PRECURSOR (EC 1.4.1.3) (GDH). [Source:SWISSPROT;Acc:P00367] ENSG00000148672 (-1) (88474824 88476085 88519103 88519200 88381950) 1261 (1261 nt) HUGO:4335:GLUD [IPR006095:Glu/Leu/Phe/Val dehydrogenase; IPR006096:Glu/Leu/Phe/Val dehydrogenase, C terminal; IPR006097:Glu/Leu/Phe/Val dehydrogenase, dimerisation domain;]	1	-21.76	105		ENSRNOG00000010222 (rno-miR-337)	rno-mir-337	rno-mir-337	0004353 glutamate dehydrogenase [NAD(P)] activity IEA; 0016491 oxidoreductase activity IEA; 0006520 amino acid metabolism IEA; 0006538 glutamate catabolism TAS; 0005739 mitochondrion NR;	3' UUUCCGUAGUAUAUCCUCGACUU 5' rno-mir-337 __ .|:.|.|||||:||..||||||: __ 5' UAGCGGAUCAUGUACAAGCUGAG 3' ENST00000277865 E:-21.76 S:105.000000 Loc:171 Cons: %(mmu) 91.30%(rno)
ENST00000312763	ENSG00000001631	CCM1	1		ENSMUSG00000000600	ENSRNOG00000007937	KREV INTERACTION TRAPPED 1 (KRIT1) (CEREBRAL CAVERNOUS MALFORMATIONS 1 PROTEIN). [Source:SWISSPROT;Acc:O00522] ENSG00000001631 (-1) (91440532 91442079 91483478 91487443 91375708) 1547 (1547 nt) HUGO:1573:CAM KRIT1 [IPR002110:Ankyrin;]	1	-17.8	104		ENSRNOG00000007937 (mmu-miR-144)	hsa-mir-144	hsa-mir-144	0005083 small GTPase regulatory/interacting protein activity TAS; 0007264 small GTPase mediated signal transduction TAS; 0005856 cytoskeleton IEA;	3' GAUCAUGUAGUAGAUAUGACAU 5' hsa-mir-144 __ .|.|||||..||||:||||.|| __ 5' AUUGUACAGAAUCUGUACU-UA 3' ENST00000312763 E:-17.799999 S:104.000000 Loc:430 Cons: %(mmu) 95.24%(rno)
ENST00000333353	ENSG00000182220	ATP6AP2	1		ENSMUSG00000031007	ENSRNOG00000003858	VACUOLAR ATP SYNTHASE MEMBRANE SECTOR ASSOCIATED PROTEIN M8-9 (V-ATPASE M8.9 SUBUNIT). [Source:SWISSPROT;Acc:O75787] ENSG00000182220 (1) (39471075 39471233 39495930 39496809 40013762) 879 (879 nt) HUGO:18305:APT6M8-9 ATP6IP2 ATP6M8-9 M8-9 []	1	-20.98	104		ENSRNOG00000003858 (mmu-miR-30a)	hsa-mir-30a	hsa-mir-30a	0015078 hydrogen ion transporter activity IEA; 0016787 hydrolase activity IEA; 0015992 proton transport IEA; 0016021 integral to membrane IEA; 0004872 receptor activity IEA;	3' CGACGUUUGUAGGCUGACUUUC 5' hsa-mir-30a __ .:||.|||:||.|.|||||||| __ 5' UUUGGAAAUAUGC-ACUGAAAG 3' ENST00000333353 E:-20.98 S:104.000000 Loc:267 Cons: %(mmu) 95.24%(rno)
ENST00000005178_P	ENSG00000004799	PDK4	1		ENSMUSG00000019577	ENSRNOG00000009565	[PYRUVATE DEHYDROGENASE [LIPOAMIDE]] KINASE ISOZYME 4, MITOCHONDRIAL PRECURSOR (EC 2.7.1.99) (PYRUVATE DEHYDROGENASE KINASE ISOFORM 4). [Source:SWISSPROT;Acc:Q16654] ENSG00000004799 (-1) (94826982 948 HUGO:8812: [IPR004358:Bacterial sensor protein, C-terminal; IPR003594:ATP-binding region, ATPase-like;]	1	-23.16	104		ENSRNOG00000009565 (mmu-miR-183)	hsa-mir-183	hsa-mir-183	0004672 protein kinase activity TAS; 0004740 [pyruvate dehydrogenase (lipoamide)] kinase activity TAS; 0005524 ATP binding IEA; 0016740 transferase activity IEA; 0006006 glucose metabolism TAS; 0007165 signal transduction IEA; 0005739 mitochondrion TAS;	3' GUCACUUAAGAU--GGUCACGGUAU 5' hsa-mir-183 __ .||||::.||||..|||||||::.. __ 5' AAGUGGG-UCUACACCAGUGCUGCU 3' ENST00000005178_P E:-23.16 S:104.000000 Loc:34 Cons: %(mmu) 91.67%(rno)
ENST00000271732	ENSG00000143457		1		ENSMUSG00000046519	ENSRNOG00000021162	GPP34-RELATED PROTEIN. [Source:RefSeq;Acc:NM_018178] ENSG00000143457 (-1) (147835288 147837379 147883896 147886215 147818636) 2091 (2091 nt) []	1	-25.15	104		ENSRNOG00000021162 (mmu-miR-212)	hsa-mir-212	hsa-mir-212		3' CCGGC-ACUGACCUCUGACAAU 5' hsa-mir-212 __ ..|:|.||:||||.||||||.| __ 5' CCCUGCUGGCUGGUGACUGUCA 3' ENST00000271732 E:-25.15 S:104.000000 Loc:28 Cons: %(mmu) 90.91%(rno)
ENST00000316615	ENSG00000177885	GRB2	1		ENSMUSG00000020746	ENSRNOG00000003990	GROWTH FACTOR RECEPTOR-BOUND PROTEIN 2 (GRB2 ADAPTER PROTEIN) (SH2/SH3 ADAPTER GRB2) (ASH PROTEIN). [Source:SWISSPROT;Acc:P29354] ENSG00000177885 (-1) (73912793 73913572 73986832 73998690 73882638) 77 HUGO:4566: [IPR000980:SH2 motif; IPR001452:SH3 domain; IPR000108:Neutrophil cytosol factor 2;]	1	-20.37	103	ENSMUSG00000020746 (mmu-miR-185)	ENSRNOG00000003990 (mmu-miR-185)	hsa-mir-185	hsa-mir-185	0005070 SH3/SH2 adaptor protein activity TAS; 0007173 EGF receptor signaling pathway TAS; 0007242 intracellular signaling cascade IEA; 0007265 RAS protein signal transduction TAS; 0007267 cell-cell signaling TAS;	3' CUUGACGGAAAGAGAGGU 5' hsa-mir-185 __ |::|||.:.|||||||:| __ 5' GGGCUGGUAUUCUCUCUA 3' ENST00000316615 E:-20.370001 S:103.000000 Loc:359 Cons: 94.44%(mmu) 94.44%(rno)
ENST00000318844_P	ENSG00000113520	IL4	1		ENSMUSG00000000869	ENSRNOG00000007624	INTERLEUKIN-4 PRECURSOR (IL-4) (B-CELL STIMULATORY FACTOR 1) (BSF-1) (LYMPHOCYTE STIMULATORY FACTOR 1). [Source:SWISSPROT;Acc:P05112] ENSG00000113520 (1) (132085959 132085959 132094495 132094495 13222 HUGO:6014:BSF1 IL-4 [IPR001325:Interleukin-4/interleukin-13; IPR002354:Interleukin 4;]	1	-22.64	103		ENSRNOG00000007624 (mmu-miR-187)	hsa-mir-187	hsa-mir-187	0005136 interleukin-4 receptor binding TAS; 0006935 chemotaxis TAS; 0006968 cellular defense response TAS; 0008203 cholesterol metabolism ISS; 0008283 cell proliferation TAS; 0030183 B-cell differentiation TAS; 0042092 T-helper 2 type immune response TAS; 0045189 connective tissue growth factor biosynthesis TAS; 0045191 regulation of isotype switching TAS; 0005615 extracellular space TAS;	3' GCCGACGUUGUGUUCUGUGCU 5' hsa-mir-187 __ .|.||||..||||:||:|:|: __ 5' AGUCUGC--CACAGGAUAUGG 3' ENST00000318844_P E:-22.639999 S:103.000000 Loc:2667 Cons: %(mmu) 94.74%(rno)
ENST00000325589	ENSG00000152061		1		ENSMUSG00000026721	ENSRNOG00000002736	ENSG00000152061 (1) (172008455 172008847 172198514 172203820 172207975) 5306 (5306 nt) [IPR000195:RabGAP/TBC domain;]	1	-17.44	102	ENSMUSG00000026721 (mmu-miR-144)		hsa-mir-144	hsa-mir-144		3' GAUCAUGUAGUAGAUA-UGACAU 5' hsa-mir-144 __ .|||||||.|.|||||.|.|||| __ 5' AUAGUACA-C-UCUAUAAAUGUA 3' ENST00000325589 E:-17.440001 S:102.000000 Loc:5039 Cons: 95.24%(mmu) %(rno)
ENST00000319246	ENSG00000085788		1		ENSMUSG00000031571	ENSRNOG00000015501	ENSG00000085788 (1) (38106475 38112427 38135007 38136354 38261389) 895 (895 nt) [IPR001660:Sterile alpha motif SAM; IPR004177:DDHD domain;]	1	-18.17	102		ENSRNOG00000015501 (mmu-miR-15a)	hsa-mir-15a	hsa-mir-15a	0046872 metal ion binding IEA;	3' GUGUUUGGUA-AUACACGACGAU 5' hsa-mir-15a __ .|::|.||||.||||.||||||. __ 5' AAUGACCCAUCUAUG-GCUGCUU 3' ENST00000319246 E:-18.17 S:102.000000 Loc:2 Cons: %(mmu) 90.91%(rno)
ENST00000297904	ENSG00000165197	FIGF	1		ENSMUSG00000031380	ENSRNOG00000003587	VASCULAR ENDOTHELIAL GROWTH FACTOR D PRECURSOR (VEGF-D) (C-FOS INDUCED GROWTH FACTOR) (FIGF). [Source:SWISSPROT;Acc:O43915] ENSG00000165197 (-1) (14725145 14725681 14763494 14764003 14711479) 536 (536 HUGO:3708:VEGF-D VEGFD [IPR000072:Platelet-derived growth factor (PDGF); IPR004153:CXCXC repeat;]	1	-19.81	102	ENSMUSG00000031380 (mmu-miR-301)		hsa-mir-301	hsa-mir-301	0005161 platelet-derived growth factor receptor binding TAS; 0008083 growth factor activity IEA; 0000074 regulation of cell cycle IEA; 0001525 angiogenesis IEA; 0008283 cell proliferation IEA; 0008284 positive regulation of cell proliferation TAS; 0005615 extracellular space TAS; 0016020 membrane IEA;	3' CGAAACUGUUAUGAUAAC-GUGAC 5' hsa-mir-301 __ ||||||.|||.::|:.||.||||| __ 5' GCUUUGCCAA-GUUGCUGUCACUG 3' ENST00000297904 E:-19.809999 S:102.000000 Loc:46 Cons: 91.30%(mmu) %(rno)
ENST00000247271	ENSG00000126861	OMG	1		ENSMUSG00000049612	ENSRNOG00000014107	OLIGODENDROCYTE-MYELIN GLYCOPROTEIN PRECURSOR. [Source:SWISSPROT;Acc:P23515] ENSG00000126861 (-1) (29767232 29767590 29768912 29769814 29523645) 358 (358 nt) HUGO:8135:OMGP [IPR000276:Rhodopsin-like GPCR superfamily; IPR001611:Leucine-rich repeat; IPR000372:Cysteine-rich flanking region, N-terminal;]	1	-19.85	102	ENSMUSG00000049612 (mmu-let-7g)	ENSRNOG00000014107 (mmu-let-7g)	hsa-let-7g hsa-mir-103 hsa-mir-107		0005194 cell adhesion molecule activity IEA; 0007155 cell adhesion IEA; 0005624 membrane fraction NR; 0005887 integral to plasma membrane NR;	3' UGACAUGUUUGAUGAUGGAGU 5' hsa-let-7g __ .:.||||..:||:|||::|:| __ 5' UUGGUACUUGCUGCUAUUUUA 3' ENST00000247271 E:-19.85 S:102.000000 Loc:182 Cons: 95.24%(mmu) 95.24%(rno)
ENST00000318840_P	ENSG00000170185	USP38	1		ENSMUSG00000038250	ENSRNOG00000026880	HP43.8KD PROTEIN. [Source:RefSeq;Acc:NM_032557] ENSG00000170185 (1) (144712521 144712521 144719236 144719236 144835970) 4001 (4001 nt) HUGO:20067:HP43.8KD KIAA1891 [IPR001394:Ubiquitin thiolesterase, family 2; IPR001687:ATP/GTP-binding site motif A (P-loop);]	1	-21.06	102		ENSRNOG00000026880 (mmu-miR-214)	hsa-mir-214	hsa-mir-214	0004197 cysteine-type endopeptidase activity IEA; 0004221 ubiquitin thiolesterase activity IEA; 0006511 ubiquitin-dependent protein catabolism IEA;	3' GACGGACAGACACGG-ACGACA 5' hsa-mir-214 __ ...:||||.||||||.|||.|| __ 5' AGUUCUGUAUGUGCCUUGCAGU 3' ENST00000318840_P E:-21.059999 S:102.000000 Loc:753 Cons: %(mmu) 90.91%(rno)
ENST00000259523	ENSG00000136997	MYC	1		ENSMUSG00000022346	ENSRNOG00000004500	MYC PROTO-ONCOGENE PROTEIN (C-MYC). [Source:SWISSPROT;Acc:P01106] ENSG00000136997 (1) (128705093 128707098 128709793 128710260 128763395) 467 (467 nt) HUGO:7553:c-Myc [IPR001092:Basic helix-loop-helix dimerization domain bHLH; IPR002418:Transcription regulator Myc; IPR003327:Leucine zipper, Myc;]	1	-22.33	102		ENSRNOG00000004500 (mmu-let-7b)	hsa-let-7b hsa-let-7c		0003700 transcription factor activity TAS; 0006357 regulation of transcription from Pol II promoter TAS; 0006879 iron ion homeostasis TAS; 0007050 cell cycle arrest TAS; 0008283 cell proliferation TAS; 0009405 pathogenesis TAS; 0005634 nucleus TAS;	3' UUGGUAUGUUGGAUGAUGGAGU 5' hsa-let-7c __ |:|||||..::..|||:||||| __ 5' AGCCAUAAUGUAAACUGCCUCA 3' ENST00000259523 E:-22.33 S:102.000000 Loc:124 Cons: %(mmu) 95.45%(rno)
ENST00000332556	ENSG00000185896	LAMP1	1		ENSMUSG00000031447	ENSRNOG00000019629	LYSOSOME-ASSOCIATED MEMBRANE GLYCOPROTEIN 1 PRECURSOR (LAMP-1) (CD107A ANTIGEN). [Source:SWISSPROT;Acc:P11279] ENSG00000185896 (1) (111899557 111899757 111924737 111925742 112068391) 1005 (1005 nt) HUGO:6499: [IPR002000:Lysosome-associated membrane glycoprotein (Lamp)/CD68; IPR000694:Proline-rich region;]	1	-24.49	102	ENSMUSG00000031447 (mmu-miR-346)		rno-mir-346	rno-mir-346	0005624 membrane fraction TAS; 0005764 lysosome TAS; 0005887 integral to plasma membrane TAS;	3' UCUCCGUCCGUGAGUCCGUCUGU 5' rno-mir-346 __ :||||||..|.:||.||||.||: __ 5' GGAGGCACACUUUCUGGCAAACG 3' ENST00000332556 E:-24.49 S:102.000000 Loc:71 Cons: 95.65%(mmu) %(rno)
ENST00000315215	ENSG00000020181	GPR124	1		ENSMUSG00000031486	ENSRNOG00000012991	G PROTEIN-COUPLED RECEPTOR 124; TUMOR ENDOTHELIAL MARKER 5 PRECURSOR. [Source:RefSeq;Acc:NM_032777] ENSG00000020181 (1) (37711708 37711816 37757157 37758778 37980424) 1621 (1621 nt) HUGO:17849:DKFZp434C211 DKFZp434J0911 FLJ14390 KIAA1531 TEM5 [IPR000832:G-protein coupled receptors family 2 (secretin-like); IPR001611:Leucine-rich repeat; IPR000483:Cysteine-rich flanking region, C-terminal; IPR0002…	1	-30.29	102	ENSMUSG00000031486 (mmu-miR-107)	ENSRNOG00000012991 (mmu-miR-150)	hsa-mir-107 hsa-mir-150 hsa-mir-188 hsa-mir-204	hsa-mir-150	0004930 G-protein coupled receptor activity IEA; 0016020 membrane IEA; 0004872 receptor activity IEA; 0007218 neuropeptide signaling pathway IEA;	3' GUGACCAUGUUCCCAACCCUCU 5' hsa-mir-150 __ ::||||.:.|||||..|||||: __ 5' UGCUGGGGAAAGGGGAGGGAGG 3' ENST00000315215 E:-30.290001 S:102.000000 Loc:1479 Cons: 100.00%(mmu) 95.45%(rno)
ENST00000303357	ENSG00000169242	EFNA1	1		ENSMUSG00000027954	ENSRNOG00000020573	EPHRIN-A1 PRECURSOR (EPH-RELATED RECEPTOR TYROSINE KINASE LIGAND 1) (LERK-1) (IMMEDIATE EARLY RESPONSE PROTEIN B61) (TUMOR NECROSIS FACTOR, ALPHA-INDUCED PROTEIN 4). [Source:SWISSPROT;Acc:P20827] ENSG HUGO:3221:ECKLG EPLG1 LERK1 TNFAIP4 [IPR001680:G-protein beta WD-40 repeat; IPR001799:Ephrin;]	1	-19.44	101	ENSMUSG00000027954 (mmu-miR-300)		mmu-mir-300 hsa-mir-34a	mmu-mir-300	0005102 receptor binding TAS; 0005108 transmembrane ephrin TAS; 0007267 cell-cell signaling TAS; 0005887 integral to plasma membrane TAS; 0016020 membrane IEA;	3' CUUCUC-UCGAACGGGAACGUAU 5' mmu-mir-300 __ .|||:|.||..|||||.||::|| __ 5' UAAGGGCAG--UGCCCAUGUGUA 3' ENST00000303357 E:-19.440001 S:101.000000 Loc:623 Cons: 90.48%(mmu) %(rno)
ENST00000222270	ENSG00000105663		1		ENSMUSG00000006307	ENSRNOG00000020967	TRITHORAX HOMOLOG 2 (MIXED LINEAGE LEUKEMIA GENE HOMOLOG 2 PROTEIN). [Source:SWISSPROT;Acc:Q9UMN6] ENSG00000105663 (1) (40900761 40900761 40921298 40921619 40928335) 321 (321 nt) [IPR000345:Cytochrome c heme-binding site; IPR002965:Proline-rich extensin; IPR001965:Zn-finger-like, PHD finger; IPR001214:Nuclear protein SET; IPR002857:Zn-finger, CXXC type; IPR000637:HMG-I and HMG-Y DNA-binding domai…	1	-20.16	101	ENSMUSG00000006307 (mmu-miR-199a*)		hsa-mir-199a*	hsa-mir-199a*	0003700 transcription factor activity NAS; 0008270 zinc ion binding NAS; 0006355 regulation of transcription, DNA-dependent IEA; 0048096 chromatin-mediated maintenance of transcription NAS; 0005634 nucleus NAS;	3' UUGGUUACACGUCUGAUGACAU 5' hsa-mir-199a* __ :.|||:..||:|||.||:|||| __ 5' GCCCAGGAUGUAGA-UAUUGUA 3' ENST00000222270 E:-20.16 S:101.000000 Loc:203 Cons: 95.24%(mmu) %(rno)
ENST00000234401	ENSG00000116044	NFE2L2	1		ENSMUSG00000015839	ENSRNOG00000001548	NUCLEAR FACTOR ERYTHROID 2 RELATED FACTOR 2 (NF-E2 RELATED FACTOR 2) (NFE2-RELATED FACTOR 2) (NUCLEAR FACTOR, ERYTHROID DERIVED 2, LIKE 2) (HEBP1). [Source:SWISSPROT;Acc:Q16236] ENSG00000116044 (-1) ( HUGO:7782:NRF2 [IPR004827:Basic-leucine zipper (bZIP) transcription factor;]	1	-20.92	101		ENSRNOG00000001548 (rno-miR-342)	rno-mir-342	rno-mir-342	0003700 transcription factor activity TAS; 0006355 regulation of transcription, DNA-dependent IEA; 0006366 transcription from Pol II promoter TAS; 0005634 nucleus IEA;	3' CUGCCCACGCUAAAGACACACUCU 5' rno-mir-342 __ ..:|||..:.:|||||||||.||. __ 5' UUUGGG-CUAGUUUCUGUGUAAGU 3' ENST00000234401 E:-20.92 S:101.000000 Loc:220 Cons: %(mmu) 100.00%(rno)
ENST00000337952_P	ENSG00000056661	RNF110	1		ENSMUSG00000018537	ENSRNOG00000012705	DNA-BINDING PROTEIN MEL-18 (ZINC FINGER PROTEIN 144). [Source:SWISSPROT;Acc:P35227] ENSG00000056661 (-1) (37266439 37266439 37271618 37279517 37205574) 4001 (4001 nt) HUGO:12929:MEL-18 RNF110 ZNF144 [IPR001841:Zn-finger, RING;]	1	-17.16	100		ENSRNOG00000012705 (mmu-miR-103)	hsa-mir-103	hsa-mir-103	0003700 transcription factor activity TAS; 0006355 regulation of transcription, DNA-dependent IEA; 0005634 nucleus NR;	3' AGUAUCGGGACAUG-UUACGACGA 5' hsa-mir-103 __ .||..|||:|.|||.|||||.|:| __ 5' ACAGUGCCUUUUACAAAUGCAGUU 3' ENST00000337952_P E:-17.16 S:100.000000 Loc:559 Cons: %(mmu) 95.83%(rno)
ENST00000302637_P	ENSG00000067704		1		ENSMUSG00000026618	ENSRNOG00000002368	ENSG00000067704 (1) (217323907 217323907 217377268 217377268 217758093) 4001 (4001 nt) [IPR001412:Aminoacyl-tRNA synthetase, class I; IPR002301:Isoleucyl-tRNA synthetase, class Ia; IPR002300:Aminoacyl-tRNA synthetase, class Ia;]	1	-18.7	100		ENSRNOG00000002368 (mmu-miR-10a)	hsa-mir-10a	hsa-mir-10a	0004822 isoleucine-tRNA ligase activity IEA; 0005524 ATP binding IEA; 0006428 isoleucyl-tRNA aminoacylation IEA;	3' GUGUUUA-AGCCUAGAUGUCCCAU 5' hsa-mir-10a __ .||.:.|.|.||..|||:|||||| __ 5' GACUGCUCUAGGCACUAUAGGGUA 3' ENST00000302637_P E:-18.700001 S:100.000000 Loc:2610 Cons: %(mmu) 91.67%(rno)
ENST00000257767	ENSG00000135316		1		ENSMUSG00000032423	ENSRNOG00000000204	NS1-ASSOCIATED PROTEIN 1. [Source:RefSeq;Acc:NM_006372] ENSG00000135316 (-1) (86319535 86320070 86346753 86348623 86299214) 535 (535 nt) [IPR000504:RNA-binding region RNP-1 (RNA recognition motif);]	1	-18.71	100	ENSMUSG00000032423 (mmu-miR-24)		hsa-mir-24	hsa-mir-24	0003676 nucleic acid binding IEA; 0003723 RNA binding TAS; 0008380 RNA splicing TAS; 0005634 nucleus TAS; 0030529 ribonucleoprotein complex TAS;	3' GACAAGGACGACUUGACUCGGU 5' hsa-mir-24 __ |||.|:|||..|||||||.::. __ 5' CUGCUUCUGGCGAACUGAUUUU 3' ENST00000257767 E:-18.709999 S:100.000000 Loc:159 Cons: 100.00%(mmu) %(rno)
ENST00000325102_P	ENSG00000125457		1		ENSMUSG00000020743	ENSRNOG00000003837	AD023 PROTEIN. [Source:RefSeq;Acc:NM_020679] ENSG00000125457 (-1) (73859692 73859692 73863399 73864426 73854805) 4001 (4001 nt) [IPR003890:Initiation factor eIF-4 gamma, middle;]	1	-21.84	100		ENSRNOG00000003837 (rno-miR-351)	rno-mir-351	rno-mir-351	0003723 RNA binding IEA; 0006412 protein biosynthesis IEA;	3' GUCCGAGUUUCCCGAGGAGUCCCU 5' rno-mir-351 __ :|||||||.|..|:|::||||.|. __ 5' UAGGCUCACA--GUUUUUCAGUGC 3' ENST00000325102_P E:-21.84 S:100.000000 Loc:3026 Cons: %(mmu) 90.91%(rno)
ENST00000259700	ENSG00000112679	DUSP22	1		ENSMUSG00000001994	ENSRNOG00000018218	DUAL SPECIFICITY PHOSPHATASE 22; MITOGEN-ACTIVATED PROTEIN KINASE PHOSPHATASE X; HOMOLOG OF MOUSE DUAL SPECIFICITY PHOSPHATASE LMW-DSP2; JNK-STIMULATING PHOSPHATASE 1. [Source:RefSeq;Acc:NM_020185] EN HUGO:16077:JKAP JSP1 MKPX [IPR000340:Dual specificity protein phosphatase; IPR000387:Tyrosine specific protein phosphatase and dual specificity protein phosphatase;]	1	-17.54	99	ENSMUSG00000001994 (mmu-miR-129)	ENSRNOG00000018218 (rno-miR-129)	hsa-mir-129	hsa-mir-129	0008138 protein tyrosine/serine/threonine phosphatase activity IEA; 0016301 kinase activity IEA; 0000188 inactivation of MAPK TAS; 0006470 protein amino acid dephosphorylation TAS; 0006915 apoptosis TAS; 0007275 development TAS; 0008283 cell proliferation TAS;	3' CGUUCGGGUCUGGC-GUUUUUC 5' hsa-mir-129 __ .:|:||:.:.:|:|.||||||| __ 5' UUAGGCUGGUGCUGCCAAAAAG 3' ENST00000259700 E:-17.540001 S:99.000000 Loc:40 Cons: 90.91%(mmu) 90.91%(rno)
ENST00000298005_P	ENSG00000165283	STOML2	1		ENSMUSG00000028455	ENSRNOG00000009535	STOMATIN (EPB72)-LIKE 2; STOMATIN-LIKE PROTEIN 2; STOMATIN-LIKE 2. [Source:RefSeq;Acc:NM_013442] ENSG00000165283 (-1) (35090032 35090032 35093091 35093091 35086548) 3486 (3486 nt) HUGO:14559:HSPC108 SLP-2 [IPR001972:Stomatin; IPR001107:Band 7 protein;]	1	-17.81	99	ENSMUSG00000028455 (mmu-miR-290)	ENSRNOG00000009535 (mmu-miR-290)	mmu-mir-290	mmu-mir-290	0005102 receptor binding TAS; 0005856 cytoskeleton TAS; 0016020 membrane IEA;	3' UUUUUCACGGGGGUAUCAAACUC 5' mmu-mir-290 __ |:|||.||:||:|.|.|.|||:| __ 5' AGAAACUGUCCUCUUUGAUUGGG 3' ENST00000298005_P E:-17.809999 S:99.000000 Loc:141 Cons: 91.30%(mmu) 95.65%(rno)
ENST00000258246	ENSG00000135766	EGLN1	1		ENSMUSG00000031987	ENSRNOG00000019773	EGL NINE HOMOLOG 1 (EC 1.14.11.-) (HYPOXIA-INDUCIBLE FACTOR PROLYL HYDROXYLASE 2) (HIF-PROLYL HYDROXYLASE 2) (HIF-PH2) (HPH-2) (PROLYL HYDROXYLASE DOMAIN-CONTAINING PROTEIN 2) (PHD2) (SM-20) (PNAS-118 HUGO:1232:C1orf12 PHD2 SM-20 ZMYND6 [IPR002893:Zn-finger, MYND type; IPR005123:2OG-Fe(II) oxygenase superfamily; IPR001472:Bipartite nuclear localization signal;]	1	-17.91	99	ENSMUSG00000031987 (mmu-miR-143)		hsa-mir-143	hsa-mir-143	0016491 oxidoreductase activity IEA; 0016702 oxidoreductase activity, acting on single donors with incorporation of molecular oxygen, incorporation of two atoms of oxygen IEA; 0016706 oxidoreductase activity, acting on paired donors, with incorporation or reduction of molecular oxygen, 2-oxoglutarate as one donor, and incorporation of one atom each of oxygen into both donors IEA; 0019538 protein …	3' ACUCGAUGUCACGAAGUAGAGU 5' hsa-mir-143 __ ||||:|.||...:||||||||. __ 5' UGAGUU-CA---UUUCAUCUCU 3' ENST00000258246 E:-17.91 S:99.000000 Loc:321 Cons: 100.00%(mmu) %(rno)
ENST00000299150	ENSG00000166123	GPT2	1		ENSMUSG00000031700	ENSRNOG00000016841	ALANINE AMINOTRANSFERASE 2; GLUTAMIC-PYRUVATE TRANSAMINASE 2. [Source:RefSeq;Acc:NM_133443] ENSG00000166123 (1) (46699396 46699716 46743997 46746286 46740100) 2289 (2289 nt) HUGO:18062:ALT2 [IPR001176:1-aminocyclopropane-1-carboxylate synthase; IPR004839:Aminotransferase, class I and II;]	1	-18.15	99	ENSMUSG00000031700 (mmu-miR-124a)	ENSRNOG00000016841 (mmu-miR-124a)	hsa-mir-124a	hsa-mir-124a	0008483 transaminase activity IEA; 0016740 transferase activity IEA; 0009058 biosynthesis IEA;	3' ACCGUA-AGUGGCGCACGGAAUU 5' hsa-mir-124a __ .|.|:|.|:.|:.:|||||||:| __ 5' AGACGUCUUUCUUUGUGCCUUGA 3' ENST00000299150 E:-18.15 S:99.000000 Loc:137 Cons: 91.30%(mmu) 91.30%(rno)
ENST00000275927	ENSG00000147003		1		ENSMUSG00000015401	ENSRNOG00000003960	KIDNEY-SPECIFIC MEMBRANE PROTEIN; COLLECTRIN. [Source:RefSeq;Acc:NM_020665] ENSG00000147003 (-1) (15006877 15007520 15044324 15044580 14980564) 643 (643 nt) []	1	-20.49	99	ENSMUSG00000015401 (mmu-miR-210)		hsa-mir-210	hsa-mir-210		3' GUCGGCGACAGUGUGCGUGUC 5' hsa-mir-210 __ ...|:|:|.||||||..|||| __ 5' AUCCUGUUAUCACACCAACAG 3' ENST00000275927 E:-20.49 S:99.000000 Loc:509 Cons: 95.24%(mmu) %(rno)
ENST00000249923	ENSG00000129083	COPB	1		ENSMUSG00000030754	ENSRNOG00000012000	COATOMER BETA SUBUNIT (BETA-COAT PROTEIN) (BETA-COP). [Source:SWISSPROT;Acc:P53618] ENSG00000129083 (-1) (14443362 14443679 14484783 14485707 14344726) 317 (317 nt) HUGO:2231: [IPR002553:Adaptin, N-terminal;]	1	-17.57	98	ENSMUSG00000030754 (mmu-miR-217)		hsa-mir-217	hsa-mir-217	0008565 protein transporter activity IEA; 0006886 intracellular protein transport IEA; 0006899 nonselective vesicle transport NR; 0009405 pathogenesis TAS; 0000139 Golgi membrane TAS; 0005798 Golgi vesicle TAS; 0005829 cytosol TAS; 0016020 membrane IEA;	3' UAGGUUAGUCAAGGAC-UACGUCAU 5' hsa-mir-217 __ :||:.|.|||||.|||.||||.||. __ 5' GUCUUAACAGUU-CUGAAUGCUGUC 3' ENST00000249923 E:-17.57 S:98.000000 Loc:182 Cons: 91.67%(mmu) %(rno)
ENST00000239698	ENSG00000120533		1		ENSMUSG00000022338	ENSRNOG00000004681	DC6 PROTEIN. [Source:RefSeq;Acc:NM_020189] ENSG00000120533 (1) (110303153 110304940 110312293 110312481 110331394) 188 (188 nt) []	1	-18.11	98		ENSRNOG00000004681 (mmu-miR-30d)	hsa-mir-30d	hsa-mir-30d		3' GAAGGUCAGCCCCUACAAAUGU 5' hsa-mir-30d __ :||:||||....|||||.|||| __ 5' UUUUCAGU-AAUGAUGUAUACA 3' ENST00000239698 E:-18.110001 S:98.000000 Loc:108 Cons: %(mmu) 100.00%(rno)
ENST00000335615	ENSG00000116962	NID	1		ENSMUSG00000005397	ENSRNOG00000002461	NIDOGEN PRECURSOR (ENTACTIN). [Source:SWISSPROT;Acc:P14543] ENSG00000116962 (-1) (233180290 233182316 233269528 233269540 233034867) 2026 (2026 nt) HUGO:7821: [IPR000152:Aspartic acid and asparagine hydroxylation site; IPR006209:EGF-like domain; IPR000716:Thyroglobulin type-1; IPR001881:EGF-like calcium-binding; IPR000033:Low-density lipoprotein receptor, YWTD repeat;]	1	-20.44	98	ENSMUSG00000005397 (mmu-miR-30a)		hsa-mir-30a	hsa-mir-30a	0005194 cell adhesion molecule activity IEA; 0005201 extracellular matrix structural constituent NR; 0005509 calcium ion binding IEA; 0007160 cell-matrix adhesion IEA; 0005604 basement membrane NR; 0016020 membrane IEA;	3' CGACGUUUGUAGGCUGACUUUC 5' hsa-mir-30a __ .|||:::|.|.||.||||||:| __ 5' ACUGUGGA-AACC-ACUGAAGG 3' ENST00000335615 E:-20.440001 S:98.000000 Loc:1915 Cons: 95.00%(mmu) %(rno)
ENST00000247066_P	ENSG00000126685	IRS4	1		ENSMUSG00000054667	ENSRNOG00000019011	INSULIN RECEPTOR SUBSTRATE 4. [Source:RefSeq;Acc:NM_003604] ENSG00000126685 (-1) (106747658 106747658 106751431 106751431 106454569) 4001 (4001 nt) HUGO:6128:PY160 [IPR001687:ATP/GTP-binding site motif A (P-loop); IPR002404:Insulin receptor substrate-1, PTB; IPR001849:Pleckstrin-like;]	1	-22.99	98		ENSRNOG00000019011 (mmu-miR-184)	hsa-mir-184	hsa-mir-184	0004872 receptor activity IEA; 0005070 SH3/SH2 adaptor protein activity TAS; 0005158 insulin receptor binding IEA; 0007165 signal transduction TAS; 0005886 plasma membrane TAS;	3' UGGGAAUAGUCAAGAGGCAGGU 5' hsa-mir-184 __ ||||..|.|||||:||..|||| __ 5' ACCC-CAGCAGUUUUCAUUCCA 3' ENST00000247066_P E:-22.99 S:98.000000 Loc:1174 Cons: %(mmu) 90.48%(rno)
ENST00000266007_P	ENSG00000124493	GRM4	1		ENSMUSG00000024211	ENSRNOG00000000233	METABOTROPIC GLUTAMATE RECEPTOR 4 PRECURSOR (MGLUR4). [Source:SWISSPROT;Acc:Q14833] ENSG00000124493 (-1) (34037453 34037453 34148128 34148128 33818649) 4001 (4001 nt) HUGO:4596:GPRC1D mGlu4 MGLUR4 [IPR000337:G-protein coupled receptors family 3 (Metabotropic glutamate receptor-like); IPR001786:Metabotropic glutamate receptor 4; IPR000162:Metabotropic glutamate receptor; IPR002455:Metabotropic gam…	1	-17.27	97	ENSMUSG00000024211 (hsa-miR-105)		hsa-mir-105	hsa-mir-105	0008067 metabotropic glutamate, GABA-B-like receptor activity TAS; 0007186 G-protein coupled receptor protein signaling pathway IEA; 0007194 negative regulation of adenylate cyclase activity TAS; 0007268 synaptic transmission TAS; 0005887 integral to plasma membrane TAS;	3' UGUCCUCAGACUCGUAAACU 5' hsa-mir-105 __ .||.|.|.|||:|::||||: __ 5' UCA-GUGCCUGGGUGUUUGG 3' ENST00000266007_P E:-17.27 S:97.000000 Loc:870 Cons: 94.74%(mmu) %(rno)
ENST00000237500	ENSG00000118680		1		ENSMUSG00000034868	ENSRNOG00000015278	MYOSIN REGULATORY LIGHT CHAIN MRCL2. [Source:RefSeq;Acc:NM_033546] ENSG00000118680 (1) (3252123 3262897 3267935 3268247 3384950) 312 (312 nt) [IPR002048:Calcium-binding EF-hand;]	1	-17.76	97	ENSMUSG00000034868 (mmu-miR-29a)		hsa-mir-29a hsa-mir-321	hsa-mir-321	0005509 calcium ion binding IEA;	3' CUUGGGUGUUAGGGACCGAAU 5' hsa-mir-321 __ ..|::|::.||::||||:||. __ 5' AUAUUCGU-AUUUCUGGUUUU 3' ENST00000237500 E:-17.76 S:97.000000 Loc:254 Cons: 90.00%(mmu) %(rno)
ENST00000218340	ENSG00000102218	RP2	1		ENSMUSG00000031058	ENSRNOG00000025428	XRP2 PROTEIN. [Source:SWISSPROT;Acc:O75695] ENSG00000102218 (1) (45742357 45742518 45785186 45787775 45817851) 2589 (2589 nt) HUGO:10274: []	1	-17.86	97	ENSMUSG00000031058 (mmu-miR-130b)	ENSRNOG00000025428 (mmu-miR-130b)	hsa-mir-130b	hsa-mir-130b	0003754 chaperone activity TAS; 0004550 nucleoside-diphosphate kinase activity IEA; 0005524 ATP binding IEA; 0006183 GTP biosynthesis IEA; 0006228 UTP biosynthesis IEA; 0006241 CTP biosynthesis IEA; 0007025 beta-tubulin folding TAS; 0007601 vision TAS;	3' UACGGGAAAGUAG-UAACGUGAC 5' hsa-mir-130b __ .|.|:|||.|||:.||.|:|||| __ 5' UUUCUCUUGCAUUAAUAGUACUG 3' ENST00000218340 E:-17.860001 S:97.000000 Loc:2466 Cons: 91.30%(mmu) 91.30%(rno)
ENST00000326163	ENSG00000070367	SEC10L1	1		ENSMUSG00000036308	ENSRNOG00000013804	EXOCYST COMPLEX COMPONENT SEC10 (HSEC10). [Source:SWISSPROT;Acc:O00471] ENSG00000070367 (-1) (55663624 55665368 55704471 55704475 55267229) 1744 (1744 nt) HUGO:10696:SEC10 SEC10P []	1	-18.03	97	ENSMUSG00000036308 (mmu-miR-22)	ENSRNOG00000013804 (mmu-miR-22)	hsa-mir-22	hsa-mir-22	0008565 protein transporter activity IEA; 0006886 intracellular protein transport IEA; 0006887 exocytosis IEA; 0006892 post-Golgi transport TAS; 0005737 cytoplasm TAS; 0005871 kinesin complex IEA;	3' UGUCAAGAAGUUGACCGUCGAA 5' hsa-mir-22 __ :||||..||:.||||||..:|| __ 5' GCAGUAGUUUUACUGGCCAUUU 3' ENST00000326163 E:-18.030001 S:97.000000 Loc:1696 Cons: 100.00%(mmu) 100.00%(rno)
ENST00000265175	ENSG00000138802	SEC24B	1		ENSMUSG00000001052	ENSRNOG00000023373	PROTEIN TRANSPORT PROTEIN SEC24B (SEC24-RELATED PROTEIN B). [Source:SWISSPROT;Acc:O95487] ENSG00000138802 (1) (110813691 110813846 110919651 110920429 111040171) 778 (778 nt) HUGO:10704: [IPR000425:MIP family; IPR007123:Gelsolin region; IPR006895:Sec23/Sec24 zinc finger; IPR006896:Sec23/Sec24 trunk domain; IPR006900:Sec23/Sec24 helical domain;]	1	-18.08	97	ENSMUSG00000001052 (mmu-let-7a)		hsa-let-7a hsa-let-7c hsa-let-7b hsa-let-7d		0008565 protein transporter activity IEA; 0006886 intracellular protein transport IEA; 0016192 vesicle-mediated transport TAS; 0005783 endoplasmic reticulum IEA; 0005794 Golgi apparatus IEA; 0005800 COPII vesicle TAS; 0005803 secretory vesicle TAS; 0016020 membrane TAS;	3' UUGAUA-U-GUUGGAUGAUGGAGU 5' hsa-let-7a __ |.:|||.|.||:|||||||.:|.| __ 5' AUUUAUGAUCAGCCUACUAAUUAA 3' ENST00000265175 E:-18.08 S:97.000000 Loc:740 Cons: 91.67%(mmu) %(rno)
ENST00000305218	ENSG00000168439	STIP1	1		ENSMUSG00000024966	ENSRNOG00000021164	STRESS-INDUCED-PHOSPHOPROTEIN 1 (STI1) (HSP70/HSP90-ORGANIZING PROTEIN) (TRANSFORMATION-SENSITIVE PROTEIN IEF SSP 3521). [Source:SWISSPROT;Acc:P31948] ENSG00000168439 (1) (63729032 63729094 63746958 6 HUGO:11387: [IPR001440:TPR repeat; IPR000694:Proline-rich region;]	1	-18.33	97	ENSMUSG00000024966 (mmu-miR-30e)	ENSRNOG00000021164 (mmu-miR-30e)	hsa-mir-30e	hsa-mir-30e	0006950 response to stress TAS; 0005634 nucleus TAS; 0005794 Golgi apparatus TAS;	3' AGGUCAGUUCCUACAAAUGU 5' hsa-mir-30e __ .|||||:::|.:||.|||:| __ 5' GCCAGUUGGGCGUGGUUAUA 3' ENST00000305218 E:-18.33 S:97.000000 Loc:398 Cons: 90.00%(mmu) 90.00%(rno)
ENST00000268476	ENSG00000140824	TAT	1		ENSMUSG00000001670	ENSRNOG00000016348	TYROSINE AMINOTRANSFERASE (EC 2.6.1.5) (L-TYROSINE:2-OXOGLUTARATE AMINOTRANSFERASE) (TAT). [Source:SWISSPROT;Acc:P17735] ENSG00000140824 (-1) (71376975 71378229 71386500 71387177 71299400) 1254 (1254 HUGO:11573: [IPR004838:Aminotransferase, class-I; IPR001176:1-aminocyclopropane-1-carboxylate synthase; IPR004839:Aminotransferase, class I and II;]	1	-18.6	97	ENSMUSG00000001670 (mmu-miR-188)		hsa-mir-188	hsa-mir-188	0004838 tyrosine transaminase activity NAS; 0016740 transferase activity IEA; 0016847 1-aminocyclopropane-1-carboxylate synthase activity IEA; 0006519 amino acid and derivative metabolism IEA; 0006559 phenylalanine catabolism NAS; 0006572 tyrosine catabolism NAS; 0009058 biosynthesis IEA; 0009072 aromatic amino acid family metabolism IEA; 0008372 cellular_component unknown ND; 0008483 transaminas…	3' UGGGAGGUGGUAC-GUUCCC-UAC 5' hsa-mir-188 __ |:|:|::|::.||.||||||.||. __ 5' AUCUUUUAUUUUGCCAAGGGCAUA 3' ENST00000268476 E:-18.6 S:97.000000 Loc:1225 Cons: 91.67%(mmu) %(rno)
ENST00000259806	ENSG00000137273	FOXF2	1		ENSMUSG00000038402	ENSRNOG00000017814	FORKHEAD BOX PROTEIN F2 (FORKHEAD-RELATED PROTEIN FKHL6) (FORKHEAD- RELATED TRANSCRIPTION FACTOR 2) (FREAC-2) (FORKHEAD-RELATED ACTIVATOR- 2). [Source:SWISSPROT;Acc:Q12947] ENSG00000137273 (1) (133506 HUGO:3810:FKHL6 FREAC2 [IPR001766:Fork head transcription factor;]	1	-18.92	97	ENSMUSG00000038402 (mmu-miR-20)	ENSRNOG00000017814 (rno-miR-20)	hsa-mir-20	hsa-mir-20	0003700 transcription factor activity NR; 0003702 RNA polymerase II transcription factor activity NR; 0003713 transcription co-activator activity NR; 0006355 regulation of transcription, DNA-dependent IEA; 0006366 transcription from Pol II promoter NR; 0005634 nucleus TAS; 0005667 transcription factor complex TAS;	3' AUGGACGUG-AUAUUCGUGAAAU 5' hsa-mir-20 __ ||::|||||.|||:..:|||||. __ 5' UAUUUGCACUUAUGUAUACUUUU 3' ENST00000259806 E:-18.92 S:97.000000 Loc:659 Cons: 91.30%(mmu) 91.30%(rno)
ENST00000320356	ENSG00000106462	EZH2	1		ENSMUSG00000029687	ENSRNOG00000006048	ENHANCER OF ZESTE HOMOLOG 2 (ENX-1). [Source:SWISSPROT;Acc:Q15910] ENSG00000106462 (-1) (147896216 147896479 147936131 147936131 143924875) 263 (263 nt) HUGO:3527:ENX-1 EZH1 [IPR001214:Nuclear protein SET; IPR001472:Bipartite nuclear localization signal;]	1	-19.87	97	ENSMUSG00000029687 (mmu-miR-181b)		hsa-mir-181b rno-mir-330	hsa-mir-181b	0003677 DNA binding TAS; 0006325 establishment and/or maintenance of chromatin architecture TAS; 0006355 regulation of transcription, DNA-dependent TAS; 0005634 nucleus IEA;	3' UUGGGUGGCUGUCGUUACUUACAA 5' hsa-mir-181b __ ..|:||||.:|.||||..|:|||| __ 5' UUCUCACCAGCUGCAA--AGUGUU 3' ENST00000320356 E:-19.870001 S:97.000000 Loc:168 Cons: 100.00%(mmu) %(rno)
ENST00000331517	ENSG00000179776	CDH5	1		ENSMUSG00000031871	ENSRNOG00000013324	VASCULAR ENDOTHELIAL-CADHERIN PRECURSOR (VE-CADHERIN) (CADHERIN-5) (7B4 ANTIGEN) (CD144 ANTIGEN). [Source:SWISSPROT;Acc:P33151] ENSG00000179776 (1) (66176882 66189560 66213391 66215004 66279827) 1613 HUGO:1764:7B4 [IPR002126:Cadherin; IPR000233:Cadherin cytoplasmic region;]	1	-20.71	97	ENSMUSG00000031871 (mmu-miR-144)	ENSRNOG00000013324 (mmu-miR-144)	hsa-mir-144	hsa-mir-144	0005194 cell adhesion molecule activity IEA; 0005509 calcium ion binding IEA; 0007155 cell adhesion IEA; 0007156 homophilic cell adhesion TAS; 0005624 membrane fraction TAS; 0005886 plasma membrane TAS; 0016021 integral to membrane IEA;	3' GAUCAUGUAGUAGAUAUGACAU 5' hsa-mir-144 __ ||:||:|||.|...:||||||| __ 5' CUGGUGCAUGACAAGUACUGUA 3' ENST00000331517 E:-20.709999 S:97.000000 Loc:1551 Cons: 90.91%(mmu) 90.91%(rno)
ENST00000293804	ENSG00000161939		1		ENSMUSG00000020831	ENSRNOG00000018829	ENSG00000161939 (1) (7116544 7118742 7121149 7121403 7126955) 254 (254 nt) []	1	-18.39	96	ENSMUSG00000020831 (mmu-let-7e)		hsa-let-7e hsa-let-7d			3' UGAU-ACGUUGGAUGAUGGAGA 5' hsa-let-7d __ .||:.||.|:|||.|.|||||| __ 5' CCUGCUG-AGCCUUCCACCUCU 3' ENST00000293804 E:-18.389999 S:96.000000 Loc:49 Cons: 95.24%(mmu) %(rno)
ENST00000318129	ENSG00000181938		1		ENSMUSG00000031669	ENSRNOG00000011863	ENSG00000181938 (1) (58201820 58201903 58214030 58215444 58273047) 1414 (1414 nt) []	1	-25.31	96	ENSMUSG00000031669 (rno-miR-327)		rno-mir-327	rno-mir-327		3' UGGGAGUACGGGGAGUUCC 5' rno-mir-327 __ ..||||||.::|||||.|| __ 5' UGCCUCAUCUUCCUCAUGG 3' ENST00000318129 E:-25.309999 S:96.000000 Loc:432 Cons: 94.74%(mmu) %(rno)
ENST00000278916	ENSG00000149554	CHEK1	1		ENSMUSG00000032113	ENSRNOG00000008181	SERINE/THREONINE-PROTEIN KINASE CHK1 (EC 2.7.1.-). [Source:SWISSPROT;Acc:O14757] ENSG00000149554 (1) (125033989 125034316 125062867 125063289 125153841) 422 (422 nt) HUGO:1925:CHK1 [IPR000719:Protein kinase; IPR002290:Serine/Threonine protein kinase;]	1	-17.9	95		ENSRNOG00000008181 (mmu-miR-205)	hsa-mir-205	hsa-mir-205	0004674 protein serine/threonine kinase activity IEA; 0005524 ATP binding IEA; 0016740 transferase activity IEA; 0000077 DNA damage response, signal transduction resulting in cell cycle arrest TAS; 0000079 regulation of CDK activity TAS; 0006468 protein amino acid phosphorylation IEA; 0006974 response to DNA damage stimulus IEA; 0007049 cell cycle IEA; 0007131 meiotic recombination TAS; 0007276 g…	3' GUCUGAGGCCACCUUACUUCCU 5' hsa-mir-205 __ .|.|||::||.||||.|:|.|| __ 5' AAAACUUUGG-GGAAAGGAUGA 3' ENST00000278916 E:-17.9 S:95.000000 Loc:197 Cons: %(mmu) 90.48%(rno)
ENST00000296777	ENSG00000164326		1		ENSMUSG00000021647	ENSRNOG00000017712	COCAINE- AND AMPHETAMINE-REGULATED TRANSCRIPT PROTEIN PRECURSOR [CONTAINS: CART(1-39); CART(32-89)]. [Source:SWISSPROT;Acc:Q16568] ENSG00000164326 (1) (71099175 71099194 71100515 71100945 71487257) 43 []	1	-17.9	95		ENSRNOG00000017712 (mmu-let-7b)	hsa-let-7b hsa-let-7a hsa-let-7c		0007165 signal transduction TAS; 0007218 neuropeptide signaling pathway IEA; 0007267 cell-cell signaling TAS; 0007268 synaptic transmission IEA; 0005615 extracellular space TAS;	3' UUGAUAUGUUGGAUGAUGGAGU 5' hsa-let-7a __ ::||.|.:..|||:||:::||| __ 5' GGCUCU-UUUCCUGCUGUUUCA 3' ENST00000296777 E:-17.9 S:95.000000 Loc:121 Cons: %(mmu) 90.48%(rno)
ENST00000256767	ENSG00000134371	C1orf28	1		ENSMUSG00000026361	ENSRNOG00000003258	PARAFIBROMIN. [Source:RefSeq;Acc:NM_024529] ENSG00000134371 (1) (190379457 190379590 190508101 190508813 191446552) 712 (712 nt) HUGO:16783: [IPR007852:RNA pol II accessory factor, Cdc73; IPR001472:Bipartite nuclear localization signal;]	1	-18.12	95	ENSMUSG00000026361 (mmu-miR-188)		hsa-mir-188	hsa-mir-188		3' UGGGAGGUGGUACGUUCCCUAC 5' hsa-mir-188 __ :||:||:|.:.||:||.|||.. __ 5' GCCUUCUAGUCUGUAAUGGAAA 3' ENST00000256767 E:-18.120001 S:95.000000 Loc:187 Cons: 100.00%(mmu) %(rno)
ENST00000257931	ENSG00000135473	USP52	1		ENSMUSG00000005682	ENSRNOG00000003271	ENSG00000135473 (-1) (54996988 54997660 55013145 55014017 54996265) 672 (672 nt) HUGO:20074:KIAA0710 [IPR001394:Ubiquitin thiolesterase, family 2; IPR006055:Exonuclease;]	1	-19.04	95	ENSMUSG00000005682 (mmu-miR-96)		hsa-mir-96	hsa-mir-96	0004197 cysteine-type endopeptidase activity IEA; 0004221 ubiquitin thiolesterase activity IEA; 0004527 exonuclease activity IEA; 0006511 ubiquitin-dependent protein catabolism IEA; 0005622 intracellular IEA;	3' CGUUUUUACACGAU-CACGGUUU 5' hsa-mir-96 __ |||||::|.|.|||.|.||||:| __ 5' GCAAAGGU-U-CUAGGAGCCAGA 3' ENST00000257931 E:-19.040001 S:95.000000 Loc:170 Cons: 90.48%(mmu) %(rno)
ENST00000335745	ENSG00000064102		1		ENSMUSG00000040250	ENSRNOG00000001808	ENSG00000064102 (-1) (26949385 26949697 26960383 26960383 26876982) 312 (312 nt) []	1	-19.89	95		ENSRNOG00000001808 (hsa-miR-198)	hsa-mir-198	hsa-mir-198		3' GGAUAGAGGGGAGACCUGG 5' hsa-mir-198 __ ...:|.|:|:|||||||.. __ 5' AAAGUGUUCUCUCUGGAAA 3' ENST00000335745 E:-19.889999 S:95.000000 Loc:233 Cons: %(mmu) 94.74%(rno)
ENST00000259456	ENSG00000136929	HEMGN	1		ENSMUSG00000028332	ENSRNOG00000009436	HEMOGEN. [Source:RefSeq;Acc:NM_018437] ENSG00000136929 (-1) (96068916 96069504 96080256 96086941 96064691) 588 (588 nt) HUGO:17509:EDAG [IPR001472:Bipartite nuclear localization signal;]	1	-20.19	95		ENSRNOG00000009436 (mmu-miR-214)	hsa-mir-214 rno-mir-342	rno-mir-342		3' CUGCCCACGC-UAAAGACACACUCU 5' rno-mir-342 __ .|:|.|||:|.:|.|.||||||.|. __ 5' AAUGUGUGUGUGUGUGUGUGUGUGU 3' ENST00000259456 E:-20.190001 S:95.000000 Loc:183 Cons: %(mmu) 92.00%(rno)
ENST00000235358	ENSG00000116717	GADD45A	1		ENSMUSG00000036390	ENSRNOG00000005615	GROWTH ARREST AND DNA-DAMAGE-INDUCIBLE PROTEIN GADD45 ALPHA (DNA- DAMAGE INDUCIBLE TRANSCRIPT 1) (DDIT1). [Source:SWISSPROT;Acc:P24522] ENSG00000116717 (1) (67520799 67521094 67523373 67523935 6787892 HUGO:4095:DDIT1 GADD45 [IPR004038:Ribosomal protein L7Ae/L30e/S12e/Gadd45;]	1	-24.29	95		ENSRNOG00000005615 (rno-miR-324_5p)	rno-mir-324_5p	rno-mir-324_5p	0003735 structural constituent of ribosome IEA; 0000079 regulation of CDK activity TAS; 0006281 DNA repair TAS; 0006412 protein biosynthesis IEA; 0006915 apoptosis TAS; 0007050 cell cycle arrest TAS; 0005634 nucleus TAS; 0005840 ribosome IEA;	3' UGUGGUUACGGGAUCCCCUACGC 5' rno-mir-324_5p __ |.||::|||.||.|||||.||.| __ 5' AAACUGAUG-CCAAGGGGCUGAG 3' ENST00000235358 E:-24.290001 S:95.000000 Loc:103 Cons: %(mmu) 95.45%(rno)
ENST00000255788_P	ENSG00000100105	ZNF278	1		ENSMUSG00000020453	ENSRNOG00000018709	ZINC FINGER PROTEIN 278 LONG C ISOFORM; POZ-AT HOOK-ZINC FINGER PROTEIN; MAZ-RELATED FACTOR; BTB-POZ DOMAIN ZINC FINGER TRANSCRIPTION FACTOR. [Source:RefSeq;Acc:NM_014323] ENSG00000100105 (-1) (300493 HUGO:13071:dJ400N23 [IPR007087:Zn-finger, C2H2 type; IPR000637:HMG-I and HMG-Y DNA-binding domain (A+T-hook); IPR000515:Binding-protein-dependent transport systems inner membrane component; IPR00021…	1	-26.16	95	ENSMUSG00000020453 (mmu-miR-149)		hsa-mir-149 rno-mir-7*	hsa-mir-149	0003677 DNA binding NAS; 0005215 transporter activity IEA; 0005515 protein binding IEA; 0000004 biological_process unknown ND; 0006355 regulation of transcription, DNA-dependent IEA; 0006810 transport IEA; 0005634 nucleus NAS; 0016020 membrane IEA; 0003677 DNA binding IEA; 0005634 nucleus IEA;	3' CCUCACUUCUGUGCCUCGGUCU 5' hsa-mir-149 __ |..|||::|:|:|.|:||::|: __ 5' GUUGUGGGGGCGCUGGGCUGGG 3' ENST00000255788_P E:-26.16 S:95.000000 Loc:46 Cons: 95.45%(mmu) %(rno)
ENST00000306184	ENSG00000168246		1		ENSMUSG00000044949	ENSRNOG00000004137	DENDRITIC CELL-DERIVED UBIQUITIN-LIKE PROTEIN. [Source:RefSeq;Acc:NM_152277] ENSG00000168246 (-1) (171619324 171619756 171642222 171691565 171596019) 432 (432 nt) [IPR000626:Ubiquitin domain;]	1	-17.46	94	ENSMUSG00000044949 (mmu-miR-133)		mmu-mir-133 hsa-mir-133a	mmu-mir-133		3' UGUCGACCAACUUCCCCUGGUU 5' mmu-mir-133 __ .||.||.|.|||.||.|||||| __ 5' CCAUCU-G-UGAUGGAGACCAA 3' ENST00000306184 E:-17.459999 S:94.000000 Loc:148 Cons: 100.00%(mmu) %(rno)
ENST00000199448	ENSG00000086289		1		ENSMUSG00000002808	ENSRNOG00000018989	MAMMALIAN EPENDYMIN RELATED PROTEIN-1 PRECURSOR (MERP-1) (UCC1 PROTEIN). [Source:SWISSPROT;Acc:Q9UM22] ENSG00000086289 (1) (37700943 37700962 37730778 37732314 37958707) 1536 (1536 nt) [IPR001299:Ependymin;]	1	-17.57	94	ENSMUSG00000002808 (rno-miR-333)		rno-mir-333	rno-mir-333	0005509 calcium ion binding IEA; 0007160 cell-matrix adhesion IEA; 0005576 extracellular IEA;	3' UUUUCAUUGAUCGUGUGGUG 5' rno-mir-333 __ :.||||:.||:|||||:.:: __ 5' GCAAGUGCCUGGCACAUAGU 3' ENST00000199448 E:-17.57 S:94.000000 Loc:1153 Cons: 100.00%(mmu) %(rno)
ENST00000284984	ENSG00000154734	ADAMTS1	1		ENSMUSG00000022893	ENSRNOG00000001607	ADAMTS-1 PRECURSOR (EC 3.4.24.-) (A DISINTEGRIN AND METALLOPROTEINASE WITH THROMBOSPONDIN MOTIFS 1) (ADAM-TS 1) (ADAM-TS1) (METH-1). [Source:SWISSPROT;Acc:Q9UHI8] ENSG00000154734 (-1) (27130479 271317 HUGO:217:C3-C5 KIAA1346 METH1 [IPR001128:Cytochrome P450; IPR006025:Neutral zinc metallopeptidases, zinc-binding region; IPR000884:Thrombospondin, type I; IPR001590:Metalloprotease ADAM/reprolysin M…	1	-20.41	94	ENSMUSG00000022893 (mmu-miR-103)	ENSRNOG00000001607 (mmu-miR-103)	hsa-mir-103	hsa-mir-103	0004222 metalloendopeptidase activity IEA; 0005178 integrin binding NR; 0008201 heparin binding IEA; 0008270 zinc ion binding IEA; 0016787 hydrolase activity IEA; 0006508 proteolysis and peptidolysis IEA; 0007229 integrin-mediated signaling pathway TAS; 0008285 negative regulation of cell proliferation TAS; 0005578 extracellular matrix IEA;	3' AGUAUCGGGACAUGUUAC-GACGA 5' hsa-mir-103 __ ||:||.||:.||:.||||.|||:| __ 5' UCGUAUCCUGGUG-AAUGUCUGUU 3' ENST00000284984 E:-20.41 S:94.000000 Loc:1003 Cons: 95.65%(mmu) 95.65%(rno)
ENST00000304508	ENSG00000143479	DYRK3	1		ENSMUSG00000016526	ENSRNOG00000004870	DUAL-SPECIFICITY TYROSINE-PHOSPHORYLATION REGULATED KINASE 3 (EC 2.7.1.-). [Source:SWISSPROT;Acc:O43781] ENSG00000143479 (1) (203892600 203892748 203906009 203906237 203942275) 228 (228 nt) HUGO:3094: [IPR000719:Protein kinase; IPR002290:Serine/Threonine protein kinase;]	1	-20.75	94		ENSRNOG00000004870 (hsa-miR-MZ_mihaela)	hsa-mir-mz_mihaela	hsa-mir-mz_mihaela	0004674 protein serine/threonine kinase activity IEA; 0004713 protein-tyrosine kinase activity IEA; 0005524 ATP binding IEA; 0016740 transferase activity IEA; 0006468 protein amino acid phosphorylation TAS;	3' UGAAUCGUCCAACAUAAUAUAGGUAG 5' hsa-mir-mz_mihaela __ .||.|.|||.|||||||..:.||||| __ 5' CCUAACCAGCUUGUAUU--GGCCAUC 3' ENST00000304508 E:-20.75 S:94.000000 Loc:171 Cons: %(mmu) 95.83%(rno)
ENST00000261693	ENSG00000073060	SCARB1	1		ENSMUSG00000037936	ENSRNOG00000000981	SCAVENGER RECEPTOR CLASS B, MEMBER 1; CD36 ANTIGEN-LIKE 1; SCAVENGER RECEPTOR CLASS B TYPE 1; CD36 ANTIGEN (COLLAGEN TYPE I RECEPTOR, THROMBOSPONDIN RECEPTOR)-LIKE 1. [Source:RefSeq;Acc:NM_005505] ENS HUGO:1664:CD36L1 CLA-1 CLA1 SR-BI SRB1 [IPR002159:CD36 antigen;]	1	-20.78	94	ENSMUSG00000037936 (mmu-miR-320)		hsa-mir-320 hsa-mir-sf202_seth	hsa-mir-320	0004872 receptor activity TAS; 0005194 cell adhesion molecule activity IEA; 0005215 transporter activity TAS; 0006810 transport TAS; 0006915 apoptosis NR; 0007155 cell adhesion IEA; 0008203 cholesterol metabolism TAS; 0005624 membrane fraction NR; 0005886 plasma membrane TAS; 0016020 membrane IEA;	3' AAGCGGGAGAGUUGGGUCGAAAA 5' hsa-mir-320 __ ...||||.||..||||.||||.| __ 5' CCAGCCC-CUACACCCCGCUUCU 3' ENST00000261693 E:-20.780001 S:94.000000 Loc:58 Cons: 90.91%(mmu) %(rno)
ENST00000328089	ENSG00000171621		1		ENSMUSG00000039911	ENSRNOG00000017212	SPRY DOMAIN-CONTAINING SOCS BOX PROTEIN SSB-1. [Source:RefSeq;Acc:NM_025106] ENSG00000171621 (1) (9062530 9125497 9137180 9139134 9309105) 1954 (1954 nt) [IPR001680:G-protein beta WD-40 repeat; IPR003877:SPla/RYanodine receptor SPRY; IPR001870:B302, (SPRY)-like;]	1	-21.03	94	ENSMUSG00000039911 (mmu-miR-18)		hsa-mir-18	hsa-mir-18	0007242 intracellular signaling cascade IEA;	3' AUAGACGUGAUCUACGUGGAAU 5' hsa-mir-18 __ .|.||||..||||.|:|||||. __ 5' CAGCUGCUGUAGA-GUACCUUU 3' ENST00000328089 E:-21.030001 S:94.000000 Loc:1512 Cons: 90.48%(mmu) %(rno)
ENST00000334870_P	ENSG00000186695	PAMCI	1		ENSMUSG00000044921	ENSRNOG00000004326	PEPTIDYLGLYCINE ALPHA-AMIDATING MONOOXYGENASE COOH-TERMINAL INTERACTOR; PEPTIDYLGLYCINE ALPHA-AMIDATING MONOOXYGENASE COOH-TERMINAL INTERACTOR PROTEIN-1. [Source:RefSeq;Acc:NM_005447] ENSG00000186695 HUGO:15739:P-CIP1 [IPR000159:RA domain;]	1	-21.57	94	ENSMUSG00000044921 (mmu-miR-210)		hsa-mir-210	hsa-mir-210	0007218 neuropeptide signaling pathway IEA;	3' GUCGGCGACAGUGUGCGUGUC 5' hsa-mir-210 __ |.||:|:||..|||:|:|:|. __ 5' CUGCUGUUGGGACAUGUAUAA 3' ENST00000334870_P E:-21.57 S:94.000000 Loc:563 Cons: 90.48%(mmu) %(rno)
ENST00000231487	ENSG00000113558	SKP1A	1		ENSMUSG00000036309	ENSRNOG00000005828	S-PHASE KINASE-ASSOCIATED PROTEIN 1A (CYCLIN A/CDK2-ASSOCIATED PROTEIN P19) (P19A) (P19SKP1) (RNA POLYMERASE II ELONGATION FACTOR-LIKE PROTEIN) (ORGAN OF CORTI PROTEIN 2) (OCP-II PROTEIN) (OCP-2) (TRA HUGO:10899:EMC19 MGC34403 OCP-II OCP2 SKP1 TCEB1L [IPR001687:ATP/GTP-binding site motif A (P-loop); IPR001232:SKP1 component;]	1	-18.16	93	ENSMUSG00000036309 (mmu-miR-293)		mmu-mir-293	mmu-mir-293	0005554 molecular_function unknown ND; 0016874 ligase activity IEA; 0000004 biological_process unknown ND; 0008372 cellular_component unknown ND;	3' UGUGAUGUUUGAGACGCCGUGA 5' mmu-mir-293 __ .:|||||..|.|:||:||:.:| __ 5' UUACUACCCAGUUUGUGGUUUU 3' ENST00000231487 E:-18.16 S:93.000000 Loc:616 Cons: 100.00%(mmu) %(rno)
ENST00000309602	ENSG00000173621		1		ENSMUSG00000045045	ENSRNOG00000019356	ENSG00000173621 (1) (66400333 66400576 66403026 66403305 66518109) 279 (279 nt) [IPR001611:Leucine-rich repeat; IPR003961:Fibronectin, type III; IPR007110:Immunoglobulin-like; IPR000483:Cysteine-rich flanking region, C-terminal; IPR007087:Zn-finger, C2H2 type;]	1	-20.31	93	ENSMUSG00000045045 (rno-miR-327)		rno-mir-327	rno-mir-327		3' UGGGAGUACGGGGAGUUCC 5' rno-mir-327 __ |::||||.|:.|||||:|. __ 5' AUUCUCA-GUACCUCAGGC 3' ENST00000309602 E:-20.309999 S:93.000000 Loc:95 Cons: 94.44%(mmu) %(rno)
ENST00000322088	ENSG00000105568	PPP2R1A	1		ENSMUSG00000007564	ENSRNOG00000011282	SERINE/THREONINE PROTEIN PHOSPHATASE 2A, 65 KDA REGULATORY SUBUNIT A, ALPHA ISOFORM (PP2A, SUBUNIT A, PR65-ALPHA ISOFORM) (PP2A, SUBUNIT A, R1-ALPHA ISOFORM) (MEDIUM TUMOR ANTIGEN-ASSOCIATED 61 KDA PR HUGO:9302: [IPR000357:HEAT repeat;]	1	-21.48	93	ENSMUSG00000007564 (mmu-miR-330)		rno-mir-330	rno-mir-330	0000158 protein phosphatase type 2A activity NR;	3' AGAGAC-GUCCGGGACACGAAACG 5' rno-mir-330 __ |..|||.||..||||||||.|.|: __ 5' UGGCUGUCACUCCCUGUGCAUGGU 3' ENST00000322088 E:-21.48 S:93.000000 Loc:106 Cons: 91.67%(mmu) %(rno)
ENST00000276681	ENSG00000147676	MAL2	1		ENSMUSG00000024479	ENSRNOG00000008615	MAL2 PROTEIN. [Source:SWISSPROT;Acc:Q969L2] ENSG00000147676 (1) (120177300 120177300 120212316 120214499 120385290) 2183 (2183 nt) HUGO:13634: [IPR008253:Marvel; IPR000694:Proline-rich region;]	1	-21.58	93	ENSMUSG00000024479 (mmu-miR-134)		hsa-mir-134	hsa-mir-134	0016021 integral to membrane IEA;	3' GGGAGAC-CAGUUGGUCAGUGU 5' hsa-mir-134 __ .|||:||.||:||.:|||||.| __ 5' GCCUUUGUGUUAA-UAGUCAAA 3' ENST00000276681 E:-21.58 S:93.000000 Loc:762 Cons: 90.48%(mmu) %(rno)
ENST00000296068_P	ENSG00000163770		1		ENSMUSG00000054574	ENSRNOG00000011551	ENSG00000163770 (1) (133457462 133474304 133507102 133507104 133530689) 4001 (4001 nt) []	1	-17.02	92	ENSMUSG00000054574 (mmu-miR-125b)		hsa-mir-125b	hsa-mir-125b		3' AGUGUUC-AAUCCCAGAGUCCCU 5' hsa-mir-125b __ |:|||||.|...||.:|||||.| __ 5' UUACAAGCUCCUGGCUUCAGGUA 3' ENST00000296068_P E:-17.02 S:92.000000 Loc:1459 Cons: 91.30%(mmu) %(rno)
ENST00000266970	ENSG00000123374	CDK2	1		ENSMUSG00000025358	ENSRNOG00000006469	CELL DIVISION PROTEIN KINASE 2 (EC 2.7.1.-) (P33 PROTEIN KINASE). [Source:SWISSPROT;Acc:P24941] ENSG00000123374 (1) (54646826 54647060 54651676 54652834 54654121) 1158 (1158 nt) HUGO:1771: [IPR000719:Protein kinase; IPR002290:Serine/Threonine protein kinase;]	1	-17.53	92	ENSMUSG00000025358 (mmu-miR-210)		hsa-mir-210	hsa-mir-210	0004693 cyclin-dependent protein kinase activity TAS; 0005524 ATP binding IEA; 0016740 transferase activity IEA; 0000086 G2/M transition of mitotic cell cycle TAS; 0000910 cytokinesis IEA; 0006275 regulation of DNA replication TAS; 0006468 protein amino acid phosphorylation IEA; 0007049 cell cycle IEA; 0007067 mitosis IEA; 0007089 start control point of mitotic cell cycle TAS; 0008284 positive re…	3' GUCGGCGACAGUGUGCGUGUC 5' hsa-mir-210 __ .|.::|:||.||:::||||.. __ 5' GAUUUGUUGCCAUGUGCACCU 3' ENST00000266970 E:-17.530001 S:92.000000 Loc:993 Cons: 95.24%(mmu) %(rno)
ENST00000012443	ENSG00000011485	PPP5C	1		ENSMUSG00000003099	ENSRNOG00000016907	SERINE/THREONINE PROTEIN PHOSPHATASE 5 (EC 3.1.3.16) (PP5) (PROTEIN PHOSPHATASE T) (PP-T) (PPT). [Source:SWISSPROT;Acc:P53041] ENSG00000011485 (1) (51542134 51542194 51585443 51585943 51753742) 500 (5 HUGO:9322:PP5 PPP5 [IPR006186:Serine/threonine-specific protein phosphatase and bis(5-nucleosyl)-tetraphosphatase; IPR004843:Metallo-phosphoesterase; IPR001440:TPR repeat;]	1	-19.17	92	ENSMUSG00000003099 (hsa-miR-198)	ENSRNOG00000016907 (rno-miR-327)	hsa-mir-198 rno-mir-327	rno-mir-327	0000158 protein phosphatase type 2A activity IEA; 0004723 calcium-dependent protein serine/threonine phosphatase activity IEA; 0004724 magnesium-dependent protein serine/threonine phosphatase activity IEA; 0008420 CTD phosphatase activity IEA; 0015071 protein phosphatase type 2C activity IEA; 0016787 hydrolase activity IEA; 0017018 myosin phosphatase activity IEA; 0030145 manganese ion binding IE…	3' UGGGAGUACGGGGAGUUCC 5' rno-mir-327 __ ::.:|:||.|||||:.||| __ 5' GUAUUUAUUCCCCUUUAGG 3' ENST00000012443 E:-19.17 S:92.000000 Loc:125 Cons: 100.00%(mmu) 100.00%(rno)
ENST00000227525	ENSG00000110108		1		ENSMUSG00000034659	ENSRNOG00000028017	ENSG00000110108 (1) (60457037 60462526 60464997 60466273 60467307) 1276 (1276 nt) []	1	-19.27	92	ENSMUSG00000034659 (mmu-miR-195)		hsa-mir-195	hsa-mir-195		3' CGGUUAUAAAGACACGACGAU 5' hsa-mir-195 __ .||||.|...|||.||||||. __ 5' ACCAA-AGAGCUGAGCUGCUU 3' ENST00000227525 E:-19.27 S:92.000000 Loc:31 Cons: 100.00%(mmu) %(rno)
ENST00000325843	ENSG00000112473	HKE4	1		ENSMUSG00000024327	ENSRNOG00000000465	HISTIDINE-RICH MEMBRANE PROTEIN KE4. [Source:SWISSPROT;Acc:Q92504] ENSG00000112473 (1) (33215584 33215910 33218358 33219100 33219307) 742 (742 nt) HUGO:4927:D6S2244E H2-KE4 KE4 RING5 [IPR002395:HMW kininogen; IPR003689:Zinc transporter ZIP;]	1	-29.81	91		ENSRNOG00000000465 (rno-miR-351)	rno-mir-351	rno-mir-351	0046873 metal ion transporter activity IEA; 0030001 metal ion transport IEA; 0005624 membrane fraction TAS; 0016021 integral to membrane IEA;	3' GUCCGAGUUUCCCGAGGAGUCCCU 5' rno-mir-351 __ .|||:.|..:|||||.||.:|||: __ 5' GAGGUGC-UGGGGCUGCUGGGGGG 3' ENST00000325843 E:-29.809999 S:91.000000 Loc:60 Cons: %(mmu) 100.00%(rno)
