# Supplementary material for: Human MicroRNA Targets
Source: PLoS Biol. 2004 Oct 5;2(11):e363. doi: 10.1371/journal.pbio.0020363 (PMC521178; doi:10.1371/journal.pbio.0020363)
Supplement: Table S13 — (68 KB XLS). [file pbio.0020363.st013.xls]

## Sheet: target_comparison.txt
								Overlap of the predicted targets with validated gene targets (Lewis et al. 2003, Kiriakidou et al. 2004).
								A) Target sites predicted here in genes with measurable miRNA:gene regulation tested by Lewis et al. (Lewis, B. P., Shih, I., Jones-Rhoades, M. W., Bartel, D. P. & Burge, C. B. (2003) Cell 115, 787-798.)
Gene	MiRNA	MiRanda Gene Rank (total score)	Conserved fish target?	Human Transcript	Human Gene	Mouse Orthologue	Rat Orthologue	Annotation [Domains]	Total Conserved Hits	Total Energy (kcal/mol)	Total Score	Mouse Transcript (miRNA)	Rat Transcript (miRNA)	All miRNAs	miRNAs (non overlapping)	GO Terms	Alignments
SMAD-1	Mir-26a	4352 (92)		ENST00000302085	ENSG00000170365	ENSMUSG00000031681	ENSRNOG00000018483	MOTHERS AGAINST DECAPENTAPLEGIC HOMOLOG 1 (SMAD 1) (MOTHERS AGAINST DPP HOMOLOG 1) (MAD-RELATED PROTEIN 1) (TRANSFORMING GROWTH FACTOR- BETA SIGNALING PROTEIN-1) (BSP-1) (HSMAD1) (JV4-1). [Source:SWIS HUGO:6767:JV4-1 MADR1 SMAD1 [IPR004863:MH1 domain; IPR001132:Dwarfin protein;]	1	-20.57	92	ENSMUSG00000031681 (rno-miR-327)		rno-mir-327	rno-mir-327	0005057 receptor signaling protein activity NAS; 0016563 transcriptional activator activity NAS; 0006355 regulation of transcription, DNA-dependent IEA; 0007165 signal transduction NAS; 0007179 TGFbeta receptor signaling pathway NAS; 0005634 nucleus NAS; 0016021 integral to membrane NAS;	3' UGGGA-GUACGGGGAGUUCC 5' rno-mir-327 __ :||:|.||||:.|:|.|||| __ 5' GCCUUGCAUGUACUUGAAGG 3' ENST00000302085 E:-20.57 S:92.000000 Loc:35 Cons: 95.00%(mmu) %(rno)
SDF-1	Mir-23a	3146 (103)		ENST00000224541	ENSG00000107562	ENSMUSG00000030130	ENSRNOG00000013589	STROMAL CELL-DERIVED FACTOR 1 PRECURSOR (SDF-1) (CXCL12) (PRE-B CELL GROWTH STIMULATING FACTOR) (PBSF) (HIRH). [Source:SWISSPROT;Acc:P48061] ENSG00000107562 (-1) (44156588 44158087 44164459 44164551 4 HUGO:10672:PBSF SCYB12 SDF-1a SDF-1b SDF1 SDF1A SDF1B TLSF-a TLSF-b TPAR1 [IPR002473:Small chemokine, C-X-C/Interleukin 8; IPR001811:Small chemokine, interleukin-8 like;]	1	-18.56	103	ENSMUSG00000030130 (mmu-miR-135b)		rno-mir-135b hsa-mir-135	rno-mir-135b	0003800 antiviral response protein activity TAS; 0008009 chemokine activity TAS; 0008083 growth factor activity IEA; 0006874 calcium ion homeostasis TAS; 0006935 chemotaxis TAS; 0006954 inflammatory response NR; 0006955 immune response TAS; 0007155 cell adhesion TAS; 0007165 signal transduction TAS; 0007186 G-protein coupled receptor protein signaling pathway TAS; 0007267 cell-cell signaling NR; …	3' GUGUAU--CCUUACUUUUCGGUAU 5' rno-mir-135b __ ||:|||...|||.|.::||||||| __ 5' CAUAUAUUUGAA-GUGGAGCCAUA 3' ENST00000224541 E:-18.559999 S:103.000000 Loc:1289 Cons: 91.30%(mmu) %(rno)
BRN-3b	Mir-23a	1628 (209)		ENST00000281321	ENSG00000151615	ENSMUSG00000031688	ENSRNOG00000012167	POU DOMAIN, CLASS 4, TRANSCRIPTION FACTOR 2 (BRAIN-SPECIFIC HOMEOBOX/POU DOMAIN PROTEIN 3B) (BRN-3B). [Source:SWISSPROT;Acc:Q12837] ENSG00000151615 (1) (148137715 148137920 148139587 148141250 1489797 HUGO:9219:Brn-3b BRN3B [IPR001356:Homeobox; IPR000327:POU domain;]	2	-41.96	209	ENSMUSG00000031688 (mmu-miR-144)	ENSRNOG00000012167 (mmu-miR-290)	hsa-mir-144 mmu-mir-290	hsa-mir-144 mmu-mir-290	0003700 transcription factor activity TAS; 0000122 negative regulation of transcription from Pol II promoter TAS; 0006355 regulation of transcription, DNA-dependent IEA; 0007399 neurogenesis TAS; 0007456 eye morphogenesis (sensu Drosophila) TAS; 0005634 nucleus IEA;	3' GAUCAUGUAGUAGAUAUGACAU 5' hsa-mir-144 __ ||:||||.|:|||..||||||| __ 5' CUGGUACCUUAUC--UACUGUA 3' ENST00000281321 E:-21.4 S:111.000000 Loc:1374 Cons: 90.00%(mmu) %(rno)	3' UUUUUCACGGGGGUAUCA-AACUC 5' mmu-mir-290 __ ...:||..:|:|||.|||.||||| __ 5' UUUGAGGCUCUCCAAAGUCUUGAG 3' ENST00000281321 E:-20.559999 S:98.000000 Loc:1463 Cons: 95.83%(mmu) 95.83%(rno)
ENX-1	Mir-101	3827 (97)		ENST00000320356	ENSG00000106462	ENSMUSG00000029687	ENSRNOG00000006048	ENHANCER OF ZESTE HOMOLOG 2 (ENX-1). [Source:SWISSPROT;Acc:Q15910] ENSG00000106462 (-1) (147896216 147896479 147936131 147936131 143924875) 263 (263 nt) HUGO:3527:ENX-1 EZH1 [IPR001214:Nuclear protein SET; IPR001472:Bipartite nuclear localization signal;]	1	-19.87	97	ENSMUSG00000029687 (mmu-miR-181b)		hsa-mir-181b rno-mir-330	hsa-mir-181b	0003677 DNA binding TAS; 0006325 establishment and/or maintenance of chromatin architecture TAS; 0006355 regulation of transcription, DNA-dependent TAS; 0005634 nucleus IEA;	3' UUGGGUGGCUGUCGUUACUUACAA 5' hsa-mir-181b __ ..|:||||.:|.||||..|:|||| __ 5' UUCUCACCAGCUGCAA--AGUGUU 3' ENST00000320356 E:-19.870001 S:97.000000 Loc:168 Cons: 100.00%(mmu) %(rno)
N-MYC	Mir-101	109 (856)	Yes	ENST00000281043	ENSG00000134323	ENSMUSG00000037169	ENSRNOG00000006308	N-MYC PROTO-ONCOGENE PROTEIN. [Source:SWISSPROT;Acc:P04198] ENSG00000134323 (1) (16103785 16103926 16107958 16108862 17706482) 904 (904 nt) HUGO:7559:NMYC [IPR001092:Basic helix-loop-helix dimerization domain bHLH; IPR002418:Transcription regulator Myc;]	8	-173.9	856	ENSMUSG00000037169 (mmu-miR-122a)	ENSRNOG00000006308 (mmu-miR-122a)	hsa-mir-122a hsa-mir-147 hsa-mir-152 hsa-mir-16 hsa-mir-17_5p hsa-mir-181b hsa-mir-210 mmu-mir-290 hsa-mir-30a mmu-mir-300 hsa-mir-9	hsa-mir-17_5p hsa-mir-152 hsa-mir-30a hsa-mir-122a hsa-mir-181b hsa-mir-9 hsa-mir-147 hsa-mir-210	0003700 transcription factor activity TAS; 0006357 regulation of transcription from Pol II promoter TAS; 0008151 cell growth and/or maintenance IEA; 0005634 nucleus TAS; 0005717 chromatin TAS; 0003700 transcription factor activity IEA; 0000004 biological_process unknown ND; 0006355 regulation of transcription, DNA-dependent IEA; 0005634 nucleus IEA; 0008372 cellular_component unknown ND;	3' UGAUGGACGUGACAU-UCGUGAAAC 5' hsa-mir-17_5p __ |.|:.|||||:..||.||||||||| __ 5' AGUG-CUGCAUCUUAUAGCACUUUG 3' ENST00000281043 E:-23.6 S:116.000000 Loc:842 Cons: 91.67%(mmu) 91.67%(rno)	3' GGUUCAAGACAGUACGUGACU 5' hsa-mir-152 __ ::||..|||||:|||:||||. __ 5' UUAAUCUCUGUUAUGUACUGU 3' ENST00000281043 E:-22.940001 S:116.000000 Loc:548 Cons: 90.48%(mmu) 90.48%(rno)	3' CGACGUUUGUAGGCUGACUUUC 5' hsa-mir-30a __ ||.||.|::||:.|||||:||| __ 5' GCGGCCAGUAUUAGACUGGAAG 3' ENST00000281043 E:-19.959999 S:115.000000 Loc:460 Cons: 100.00%(mmu) %(rno)	3' UGUUUGUGGUAACAGUGUGAGGU 5' hsa-mir-122a __ ::|||:|||||||.||||.|||: __ 5' GUAAAUACCAUUGACACA-UCCG 3' ENST00000281043 E:-26.84 S:113.000000 Loc:400 Cons: 90.91%(mmu) 90.91%(rno)	3' UUGGGUGGCUGUCGUUACUUACAA 5' hsa-mir-181b __ |.:.::::||||.:||.||||||| __ 5' AUUGUGUUGACAUUAA-GAAUGUU 3' ENST00000281043 E:-17.92 S:104.000000 Loc:63 Cons: 100.00%(mmu) 100.00%(rno)	3' AGUAUGU-CGAUCUAUUGGUUUCU 5' hsa-mir-9 __ .:|||||..||:|:|||:.|:||: __ 5' GUAUACAUCCUGGGUAAUGAGAGG 3' ENST00000281043 E:-21.75 S:103.000000 Loc:429 Cons: 91.67%(mmu) %(rno)	3' CGUCUUCGUA-AAGGUGUGUG 5' hsa-mir-147 __ ..||:|||||.||::::|:|| __ 5' UGAGGAGCAUGUUUUGUAUAC 3' ENST00000281043 E:-17.93 S:96.000000 Loc:519 Cons: 90.48%(mmu) 95.24%(rno)	3' GUCGGCGACAGUG-UGCGUGUC 5' hsa-mir-210 __ |||:|.|||.|||..:|||||. __ 5' CAGUCACUGCCACUUUGCACAU 3' ENST00000281043 E:-22.959999 S:93.000000 Loc:18 Cons: 95.45%(mmu) %(rno)
PTEN	Mir-19a	332 (598)		ENST00000307803	ENSG00000171862	ENSMUSG00000013663	ENSRNOG00000020723	PHOSPHATIDYLINOSITOL-3,4,5-TRISPHOSPHATE 3-PHOSPHATASE PTEN (EC 3.1.3.67) (MUTATED IN MULTIPLE ADVANCED CANCERS 1). [Source:SWISSPROT;Acc:O00633] ENSG00000171862 (1) (89287772 89288804 89389806 893907 HUGO:9588:BZS MHAM MMAC1 TEP1 [IPR000387:Tyrosine specific protein phosphatase and dual specificity protein phosphatase;]	6	-127.43	598	ENSMUSG00000013663 (mmu-miR-135)	ENSRNOG00000020723 (rno-let-7d)	hsa-let-7d hsa-mir-135 hsa-mir-198 mmu-mir-298 hsa-mir-320 rno-mir-326	hsa-mir-135 hsa-mir-320 mmu-mir-298 98 hsa-mir-198 rno-mir-326	0004440 phosphatidylinositol-3,4-bisphosphate 4-phosphatase IEA; 0004725 protein tyrosine phosphatase activity TAS; 0016314 phosphatidylinositol-3,4,5-trisphosphate 3-phosphatase activity IEA; 0016787 hydrolase activity IEA; 0000079 regulation of CDK activity TAS; 0006470 protein amino acid dephosphorylation TAS; 0007275 development TAS; 0008283 cell proliferation TAS; 0045786 negative regulation…	3' AGUGUAUCCUUAUUUUUCGGUAU 5' hsa-mir-135 __ |||.|.|||:||||||..||||: __ 5' UCA-AGAGGGAUAAAACACCAUG 3' ENST00000307803 E:-19.360001 S:108.000000 Loc:11 Cons: 95.45%(mmu) %(rno)	3' AAGCGGGAGAGUUGGGUCGAAAA 5' hsa-mir-320 __ ||:.||.|:|:|.:||||:|||. __ 5' UUUCCCGUUUUAUUCCAGUUUUA 3' ENST00000307803 E:-20.41 S:107.000000 Loc:275 Cons: 95.65%(mmu) 95.65%(rno)	3' CCUUCUUGUCGGGAGGAGACGG 5' mmu-mir-298 __ ..|:|||||.::|||:|:|.|: __ 5' AUAGGAACAAUUCUCUUUUCCU 3' ENST00000307803 E:-22.59 S:101.000000 Loc:111 Cons: 95.45%(mmu) 95.45%(rno)	3' UGAUACGUUGGAUG-AUGGAGA 5' hsa-let-7d __ :||:||:.|:.||:.|||||:| __ 5' GCUGUGUCAUGUAUAUACCUUU 3' ENST00000307803 E:-17.65 S:96.000000 Loc:203 Cons: %(mmu) 95.45%(rno)	3' GGAUAGAGGGGAGACCUGG 5' hsa-mir-198 __ ||||...|||||:||.||: __ 5' CCUA---CCCCUUUGCACU 3' ENST00000307803 E:-19.120001 S:95.000000 Loc:402 Cons: 100.00%(mmu) %(rno)	3' UGACCUCCUUCCCGGGUC--UCC 5' rno-mir-326 __ |.||||||:|..||:|||..||| __ 5' AAUGGAGGGAAUGCUCAGAAAGG 3' ENST00000307803 E:-28.299999 S:91.000000 Loc:503 Cons: 91.30%(mmu) %(rno)
Delta1	Mir-34	936 (318)	Yes	ENST00000230339	ENSG00000112577	ENSMUSG00000014773	ENSRNOG00000014667	DELTA-LIKE PROTEIN 1 PRECURSOR (DROSOPHILA DELTA HOMOLOG 1) (DELTA1) (H-DELTA-1). [Source:SWISSPROT;Acc:O00548] ENSG00000112577 (-1) (170447810 170448471 170455925 170455989 169955431) 661 (661 nt) HUGO:2908: [IPR000152:Aspartic acid and asparagine hydroxylation site; IPR006209:EGF-like domain; IPR001881:EGF-like calcium-binding; IPR001438:Type II EGF-like signature; IPR002049:Laminin-type EGF-li…	3	-60.61	318	ENSMUSG00000014773 (mmu-miR-128a)		hsa-mir-128a hsa-mir-128b hsa-mir-17_5p rno-mir-351 hsa-mir-363	hsa-mir-17_5p hsa-mir-363 rno-mir-351	0005112 Notch binding IPI; 0005198 structural molecule activity IEA; 0005509 calcium ion binding IEA; 0001701 embryonic development (sensu Mammalia) ISS; 0001709 cell fate determination NAS; 0007154 cell communication IEA; 0007219 N signaling pathway NAS; 0007399 neurogenesis ISS; 0009912 hair cell fate commitment ISS; 0030097 hemopoiesis NAS; 0030154 cell differentiation TAS; 0030155 regulation …	3' UGAUGGACGUGAC--AUUCGUGAAAC 5' hsa-mir-17_5p __ :.||:|||:|..|..|:||:|:|||| __ 5' GAUAUCUGUAAAGCUUGAGUAUUUUG 3' ENST00000230339 E:-21.129999 S:115.000000 Loc:451 Cons: 92.31%(mmu) %(rno)	3' AAUGUCUACC-UAUGGCACGUUA 5' hsa-mir-363 __ .||:..||||.|||::||||||. __ 5' GUAUUUAUGGAAUAUUGUGCAAA 3' ENST00000230339 E:-20.059999 S:111.000000 Loc:563 Cons: 95.65%(mmu) %(rno)	3' GUCCGAGUUUCCCGAGGAGUCCCU 5' rno-mir-351 __ :|.|:.||||.|||.|:||:||.. __ 5' UAUGUACAAA-GGCACUUCGGGUC 3' ENST00000230339 E:-19.42 S:92.000000 Loc:510 Cons: 100.00%(mmu) %(rno)
G6PD	Mir-1	4086 (94)		ENST00000291567	ENSG00000160211	ENSMUSG00000031400	ENSRNOG00000020508	GLUCOSE-6-PHOSPHATE 1-DEHYDROGENASE (EC 1.1.1.49) (G6PD). [Source:SWISSPROT;Acc:P11413] ENSG00000160211 (-1) (152227157 152227766 152241921 152241921 152212414) 609 (609 nt) HUGO:4057:G6PD1 [IPR001282:Glucose-6-phosphate dehydrogenase;]	1	-17.35	94		ENSRNOG00000020508 (mmu-let-7i)	hsa-let-7i		0004345 glucose-6-phosphate 1-dehydrogenase activity NAS; 0016491 oxidoreductase activity IEA; 0006010 glucose 6-phosphate utilization TAS; 0006098 pentose-phosphate shunt NAS; 0008372 cellular_component unknown ND;	3' UCGUGUUUGAUG-AUGGAGU 5' hsa-let-7i __ |||.|.|:||||.|.||||| __ 5' AGC-CCAGCUACAUUCCUCA 3' ENST00000291567 E:-17.35 S:94.000000 Loc:155 Cons: %(mmu) 94.74%(rno)
BDNF	Mir-1	411 (524)		ENST00000328506	ENSG00000176697	ENSMUSG00000048482	ENSRNOG00000005051	BRAIN-DERIVED NEUROTROPHIC FACTOR PRECURSOR (BDNF). [Source:SWISSPROT;Acc:P23560] ENSG00000176697 (-1) (27640753 27643677 27644420 27706579 27492626) 2924 (2924 nt) HUGO:1033: [IPR002072:Nerve growth factor;]	5	-100.96	524	ENSMUSG00000048482 (mmu-miR-103)	ENSRNOG00000005051 (mmu-miR-103)	hsa-mir-103 hsa-mir-106b hsa-mir-132 hsa-mir-15a hsa-mir-16 hsa-mir-182 hsa-mir-183 hsa-mir-185 rno-mir-330 hsa-mir-95	hsa-mir-182 rno-mir-330 hsa-mir-106b hsa-mir-185 hsa-mir-95	0008083 growth factor activity TAS; 0007399 neurogenesis TAS;	3' ACACUCAA-GAUGGUAACGGUUU 5' hsa-mir-182 __ ||||:.||.:|:||:|||||||: __ 5' UGUGGUUUGUUGCCGUUGCCAAG 3' ENST00000328506 E:-27.450001 S:128.000000 Loc:236 Cons: 95.65%(mmu) 95.65%(rno)	3' AGAGACGUCCGGGACACGAAACG 5' rno-mir-330 __ |:|:||:..|:::||||:|||.: __ 5' UUUUUGUUUGUUUUGUGUUUUUU 3' ENST00000328506 E:-18.76 S:107.000000 Loc:546 Cons: 91.30%(mmu) %(rno)	3' UAGACG-UGACAGUCGUGAAAU 5' hsa-mir-106b __ |..|||.::|||||.::||||| __ 5' AGGUGCUGUUGUCAUUGCUUUA 3' ENST00000328506 E:-17.209999 S:103.000000 Loc:496 Cons: 95.45%(mmu) %(rno)	3' CUUGACGGAA--AGAGAGGU 5' hsa-mir-185 __ ..::.|||||..||||||:| __ 5' CUGUGGCCUUGUUCUCUCUA 3' ENST00000328506 E:-18.379999 S:95.000000 Loc:2689 Cons: 90.00%(mmu) %(rno)	3' ACGAGUUAUUUAUGGGC-AACUU 5' hsa-mir-95 __ |||||||.|::|.|:||..||:| __ 5' UGCUCAAGAGGUUCUCGACUGGA 3' ENST00000328506 E:-19.16 S:91.000000 Loc:1427 Cons: 91.30%(mmu) %(rno)
MCSF	Mir-130	1125 (303)		ENST00000329608	ENSG00000184371	ENSMUSG00000014599	ENSRNOG00000018659	MACROPHAGE COLONY STIMULATING FACTOR-1 PRECURSOR (CSF-1) (MCSF) (M-CSF). [Source:SWISSPROT;Acc:P09603] ENSG00000184371 (1) (109752184 109752373 109766538 109771088 109826030) 901 (901 nt) HUGO:2432: [IPR008001:Macrophage colony stimulating factor-1; IPR001472:Bipartite nuclear localization signal;]	3	-73.1	303	ENSMUSG00000014599 (mmu-miR-128b)	ENSRNOG00000018659 (mmu-miR-128b)	hsa-mir-128b hsa-mir-128a hsa-mir-139 hsa-mir-142_3p hsa-mir-23a rno-mir-328 hsa-mir-93	hsa-mir-128b hsa-mir-93 rno-mir-328	0005157 macrophage colony stimulating factor receptor binding TAS; 0006960 antimicrobial humoral response (sensu Invertebrata) NR; 0008283 cell proliferation NAS; 0008284 positive regulation of cell proliferation TAS; 0030097 hemopoiesis NAS; 0030154 cell differentiation NAS; 0030225 macrophage differentiation TAS; 0005887 integral to plasma membrane TAS; 0008372 cellular_component unknown ND;	3' CUUUCUCUGGCCAAGUGACACU 5' hsa-mir-128b __ |||:||.:||..|.|||||||| __ 5' GAAGGAAGCCAUUGCACUGUGA 3' ENST00000329608 E:-23.209999 S:111.000000 Loc:788 Cons: 100.00%(mmu) 100.00%(rno)	3' GAUGGACGUGCUUGUCGUGAAA 5' hsa-mir-93 __ ||:|||||.:|||||||.||.. __ 5' CUGCCUGC-UGAACAGC-CUGC 3' ENST00000329608 E:-27.040001 S:100.000000 Loc:819 Cons: 95.00%(mmu) 95.00%(rno)	3' UGCCUUCCCGUCUCUCCCGGUC 5' rno-mir-328 __ |..||.|||.||||:.||||.. __ 5' AGAGACGGGAAGAGGAGGCCUC 3' ENST00000329608 E:-22.85 S:92.000000 Loc:547 Cons: 90.91%(mmu) %(rno)
								B) Target sites predicted here in genes with no measurable miRNA:gene regulation tested by Lewis et al. (from Lewis, B. P., Shih, I., Jones-Rhoades, M. W., Bartel, D. P. & Burge, C. B. (2003) Cell 115, 787-798.)
Gene	MiRNA	MiRanda Gene Rank (total score)	Conserved fish target?	Human Transcript	Human Gene	Mouse Orthologue	Rat Orthologue	Annotation [Domains]	Total Conserved Hits	Total Energy (kcal/mol)	Total Score	Mouse Transcript (miRNA)	Rat Transcript (miRNA)	All miRNAs	miRNAs (non overlapping)	GO Terms	Alignments
HOX-A5	Mir-19a	730 (406)		ENST00000222726	ENSG00000106004	ENSMUSG00000038253	ENSRNOG00000006466	HOMEOBOX PROTEIN HOX-A5 (HOX-1C). [Source:SWISSPROT;Acc:P20719] ENSG00000106004 (-1) (26923268 26923726 26925498 26925559 26912672) 458 (458 nt) HUGO:5106:HOX1 HOX1C [IPR001356:Homeobox; IPR001827:Homeobox protein, antennapedia type;]	4	-78.19	406	ENSMUSG00000038253 (mmu-let-7e)	ENSRNOG00000006466 (mmu-miR-130b)	hsa-let-7e hsa-mir-130b hsa-mir-130a hsa-mir-148 mmu-mir-148a rno-mir-148b hsa-mir-15a hsa-mir-152 hsa-mir-16 hsa-mir-181a hsa-mir-184 hsa-mir-195 hsa-mir-198 mmu-mir-291_3p hsa-mir-320	rno-mir-148b hsa-mir-130b mmu-mir-291_3p hsa-mir-184	0003700 transcription factor activity NAS; 0006355 regulation of transcription, DNA-dependent NAS; 0007275 development NAS; 0005634 nucleus NAS;	3' UGUUUCAAGACACUACGUGACU 5' rno-mir-148b __ .|||.|||.||||.||||||.| __ 5' CCAAUGUUGUGUGUUGCACUCA 3' ENST00000222726 E:-19.01 S:112.000000 Loc:343 Cons: 95.45%(mmu) %(rno)	3' UACGGGAAAGUAGUAACGUGAC 5' hsa-mir-130b __ |.|||||.|:.||:||||.||. __ 5' AAGCCCUGUUCUCGUUGCCCUA 3' ENST00000222726 E:-21.74 S:106.000000 Loc:99 Cons: 100.00%(mmu) 100.00%(rno)	3' CCGUGUGU-UUCACCUUCGUGAAA 5' mmu-mir-291_3p __ .|::||::.:.|||||||:::|.. __ 5' UGUGCAUGUGCGUGGAAGUGUUCC 3' ENST00000222726 E:-18.809999 S:96.000000 Loc:376 Cons: 91.67%(mmu) %(rno)	3' UGGGAAUAGUCAAGAGGCAGGU 5' hsa-mir-184 __ .::||..|||..|||::||||. __ 5' UUUCUGUUCAUCUCUUUGUCCU 3' ENST00000222726 E:-18.629999 S:92.000000 Loc:183 Cons: 95.45%(mmu) 95.45%(rno)
MECP-2	Mir-19a	443 (515)	Yes	ENST00000303391	ENSG00000169057	ENSMUSG00000031393	ENSRNOG00000019947	METHYL-CPG-BINDING PROTEIN 2 (MECP-2 PROTEIN) (MECP2). [Source:SWISSPROT;Acc:P51608] ENSG00000169057 (-1) (151755168 151763722 151825571 151825669 151790752) 8554 (8554 nt) HUGO:6990:RTT [IPR001739:Methyl-CpG binding; IPR000637:HMG-I and HMG-Y DNA-binding domain (A+T-hook); IPR001472:Bipartite nuclear localization signal;]	5	-105.99	515	ENSMUSG00000031393 (mmu-let-7f)		hsa-let-7f hsa-let-7a hsa-mir-144 hsa-mir-195 hsa-mir-199a mmu-mir-295	hsa-mir-199a mmu-mir-295 112 hsa-mir-195 hsa-mir-144	0003677 DNA binding TAS; 0003714 transcription co-repressor activity TAS; 0000122 negative regulation of transcription from Pol II promoter TAS; 0006355 regulation of transcription, DNA-dependent IEA; 0005634 nucleus TAS;	3' UUGUCC--AUCAGACUUGUGACCC 5' hsa-mir-199a __ ::::||..||||:.||:||:|||| __ 5' GGUGGGAGUAGUUGGAGCAUUGGG 3' ENST00000303391 E:-26.190001 S:112.000000 Loc:154 Cons: 91.67%(mmu) %(rno)	3' UCUGAGUUUUCAUC--AUCGUGAAA 5' mmu-mir-295 __ ||:..||:||||||..|.||||||| __ 5' AGGGCCAGAAGUAGCUUUGCACUUU 3' ENST00000303391 E:-24.73 S:112.000000 Loc:223 Cons: 92.00%(mmu) %(rno)	3' UUGAUAUGUUAGAUGAUGGAGU 5' hsa-let-7f __ |::|:|.:|:.:|||||||||. __ 5' AGUUGU-UAG-UUACUACCUCC 3' ENST00000303391 E:-17.16 S:108.000000 Loc:3431 Cons: 90.00%(mmu) %(rno)	3' CGGUUAUAAAGACACGACGAU 5' hsa-mir-195 __ .:||:|:||||||.|..|||: __ 5' UUCAGUGUUUCUGGGGAGCUG 3' ENST00000303391 E:-20.629999 S:92.000000 Loc:6717 Cons: 90.48%(mmu) %(rno)	3' GAUCAUGUAGUAGAUAUGACAU 5' hsa-mir-144 __ :|:|||:|||..||.|.||||: __ 5' UUGGUAUAUC--CUUUUCUGUG 3' ENST00000303391 E:-17.280001 S:91.000000 Loc:2034 Cons: 100.00%(mmu) %(rno)
VAMP-2	Mir-34	24 (1300)	Yes	ENST00000316509	ENSG00000179036	ENSMUSG00000020894	ENSRNOG00000006989	VESICLE-ASSOCIATED MEMBRANE PROTEIN 2 (VAMP-2) (SYNAPTOBREVIN 2). [Source:SWISSPROT;Acc:P19065] ENSG00000179036 (-1) (8263030 8265358 8266252 8266858 8256269) 1727 (1727 nt) HUGO:12643:SYB2 VAMP-2 [IPR001388:Synaptobrevin;]	13	-270.49	1300	ENSMUSG00000020894 (hsa-miR-105)	ENSRNOG00000006989 (hsa-miR-105)	hsa-mir-105 hsa-mir-17_3p hsa-mir-182 hsa-mir-199b hsa-mir-199a rno-mir-20* hsa-mir-206 hsa-mir-224 mmu-mir-291_3p mmu-mir-292_3p mmu-mir-293 hsa-mir-320 rno-mir-324_5p rno-mir-325 rno-mir-328 rno-mir-339 rno-mir-342 hsa-mir-7	mmu-mir-293 rno-mir-20* hsa-mir-105 hsa-mir-182 mmu-mir-292_3p rno-mir-324_5p hsa-mir-17_3p hsa-mir-199b hsa-mir-320 rno-mir-342 hsa-mir-206	0006899 nonselective vesicle transport TAS; 0005803 secretory vesicle TAS; 0005871 kinesin complex IEA; 0005887 integral to plasma membrane TAS; 0008021 synaptic vesicle NR; 0019717 synaptosome IEA; 0045202 synaptic junction IEA;	3' UGUGAUGUUUGAGACGCCGUGA 5' mmu-mir-293 __ |::|..|.||:||||:|||:|. __ 5' AUGCCCCCAAUUCUGUGGCGCA 3' ENST00000316509 E:-20.67 S:110.000000 Loc:1659 Cons: 100.00%(mmu) 100.00%(rno)	3' ACAUUCAC-GAGCAUUACGUCA 5' rno-mir-20* __ ||||||||.||:|.|:|.|||| __ 5' UGUAAGUGUCUUGAAGUUCAGU 3' ENST00000316509 E:-21.08 S:108.000000 Loc:897 Cons: 90.91%(mmu) 90.91%(rno)	3' UGUCCUCAGACUCGUAAACU 5' hsa-mir-105 __ ..:||||.|||:||.||||: __ 5' UGGGGAGCCUGGGCUUUUGG 3' ENST00000316509 E:-22.290001 S:106.000000 Loc:761 Cons: 90.00%(mmu) 100.00%(rno)	3' ACACUCAAGAU-GGUAACGGUUU 5' hsa-mir-182 __ ||.|:||.|||.:||.||||||. __ 5' UGGGGGUACUAGUCACUGCCAAU 3' ENST00000316509 E:-18 S:106.000000 Loc:1295 Cons: 95.65%(mmu) 95.65%(rno)	3' UGUGAGUUUUGGACCGCCGUGAA 5' mmu-mir-292_3p __ |.:|||.:|:.|||||..||||| __ 5' AGGCUCUGAGACUGGCCCCACUU 3' ENST00000316509 E:-20.360001 S:105.000000 Loc:544 Cons: 91.30%(mmu) %(rno)	3' UGUGGUUACGGGAUCCC-CUACGC 5' rno-mir-324_5p __ .||:||.||||:|:|||.|:.|:| __ 5' UCAUCACUGCCUUGGGGAGGAGUG 3' ENST00000316509 E:-31.16 S:101.000000 Loc:1125 Cons: 95.83%(mmu) 95.83%(rno)	3' UGUUCACGGAAGU-GACGUCA 5' hsa-mir-17_3p __ .|||||.||||||.:||||.. __ 5' CCAAGUCCCUUCAUUUGCAUC 3' ENST00000316509 E:-19.92 S:100.000000 Loc:320 Cons: 95.24%(mmu) 95.24%(rno)	3' CUUGUCUAUCAGAUUUGUGACCC 5' hsa-mir-199b __ |||.:|:|||...|:|::||||. __ 5' GAAAGGGUAGGAGAGAUGCUGGA 3' ENST00000316509 E:-17.879999 S:96.000000 Loc:1567 Cons: 95.65%(mmu) 95.65%(rno)	3' GCGGGAGAGUUGGGUCGAAAA 5' __ :.||:.|||..|||||:|||. __ 5' UUCCUGCUC--CCCAGUUUUC 3' ENST00000316509 E:-20.67 S:96.000000 Loc:968 Cons: 100.00%(mmu) 100.00%(rno)	3' AAGCGGGAGAGUUGG-GUCGAAAA 5' hsa-mir-320 __ .||..|||||||:||.:|.||||. __ 5' CUCCACCUCUCAGCCAUAUCUUUC 3' ENST00000316509 E:-23.110001 S:95.000000 Loc:77 Cons: 95.83%(mmu) 95.83%(rno)	3' GCGGGAGAGUUG--GGUCGAAAA 5' __ |.||||.|.||:..||||||.|| __ 5' CCCCCUGUAAAUAGCCAGCUGUU 3' ENST00000316509 E:-17.48 S:94.000000 Loc:147 Cons: 91.30%(mmu) %(rno)	3' CUGCCCACGC-UAAAGACACACUCU 5' rno-mir-342 __ .::|.|||:|.:|.||.|||||.|. __ 5' CGUGUGUGUGUGUGUCCGUGUGUGU 3' ENST00000316509 E:-18.299999 S:92.000000 Loc:121 Cons: 92.00%(mmu) 96.00%(rno)	3' GGUGU-GUGAAGGAAUGUAAGGU 5' hsa-mir-206 __ :.|||.|.||||||.|.:||||. __ 5' UAACACCCCUUCCUGAGGUUCCC 3' ENST00000316509 E:-19.57 S:91.000000 Loc:247 Cons: 95.65%(mmu) %(rno)
LDLR	Mir-130	None
								C) Target sites predicted here in genes with measurable miRNA:gene regulation tested by Kiriakidou et al. (Kiriakidou, M., Nelson, P.T., Kouranov, A., Fitziev, P., Bouyioukos, C., Mourelatos, Z., Hatzigeorgiou, A. 2004 Genes Dev. 18(10), 1165-78.)
Gene	MiRNA	MiRanda Gene Rank (total score)	Conserved fish target?	Human Transcript	Human Gene	Mouse Orthologue	Rat Orthologue	Annotation [Domains]	Total Conserved Hits	Total Energy (kcal/mol)	Total Score	Mouse Transcript (miRNA)	Rat Transcript (miRNA)	All miRNAs	miRNAs (non overlapping)	GO Terms	Alignments
LIN-28	let-7b	199 (712)		ENST00000254231_P	ENSG00000131914	ENSMUSG00000050966	ENSRNOG00000015384	LIN-28 HOMOLOG; RNA-BINDING PROTEIN LIN-28; ZINC FINGER, CCHC DOMAIN CONTAINING 1. [Source:RefSeq;Acc:NM_024674] ENSG00000131914 (1) (26342071 26342071 26357637 26357637 26363520) 4001 (4001 nt) HUGO:15986:FLJ12457 LIN-28 ZCCHC1 [IPR002059:Cold-shock DNA-binding domain; IPR001878:Zn-finger, CCHC type;]	7	-155.04	712	ENSMUSG00000050966 (mmu-miR-130b)	ENSRNOG00000015384 (mmu-miR-18)	hsa-mir-130b hsa-mir-18 hsa-mir-197 hsa-mir-25 rno-mir-351 hsa-mir-98 hsa-let-7b	hsa-mir-25 hsa-mir-197 rno-mir-351 hsa-mir-98 hsa-mir-18 hsa-mir-130b	0003677 DNA binding IEA; 0006355 regulation of transcription, DNA-dependent IEA;	3' AGUCUGGCUCUGUUCACGUUAC 5' hsa-mir-25 __ |::.|.||:|||||.||||||. __ 5' UUGAAACGGGACAAAUGCAAUA 3' ENST00000254231_P E:-19.66 S:114.000000 Loc:1509 Cons: 100.00%(mmu) 100.00%(rno)	3' CGACCCACCUCUUCCACCACUU 5' hsa-mir-197 __ ||.|.||||||||.||||.||| __ 5' GCAGAGUGGAGAAAGUGG-GAA 3' ENST00000254231_P E:-23.290001 S:107.000000 Loc:52 Cons: 90.48%(mmu) 100.00%(rno)	3' GUCCGAGUUUCCCGAGGAGUCCCU 5' rno-mir-351 __ ||||:.||.:.|...:|||||||| __ 5' CAGGUACAUGAGCAAUCUCAGGGA 3' ENST00000254231_P E:-26.1 S:99.000000 Loc:784 Cons: 100.00%(mmu) %(rno)	3' UUGUUAUGUUGAAUGAUGGAGU 5' hsa-mir-98 __ .|||:..:|.:..||||||||| __ 5' CACAGCCUAUUGAACUACCUCA 3' ENST00000254231_P E:-17.66 S:95.000000 Loc:891 Cons: 95.45%(mmu) 95.45%(rno)	3' AUAGACGUGAUCUACGUGGAAU 5' hsa-mir-18 __ |:|.|||:...||.|:|:|||: __ 5' UGUGUGCGAAUGACGUAUCUUG 3' ENST00000254231_P E:-17.33 S:93.000000 Loc:670 Cons: %(mmu) 95.45%(rno)	3' UACGGGAAAGU-AGUAACGUGAC 5' hsa-mir-130b __ |.||||..|||.|:..||||||| __ 5' AGGCCC--UCAUUUCCUGCACUG 3' ENST00000254231_P E:-23.4 S:91.000000 Loc:757 Cons: 95.24%(mmu) %(rno)	3' UUGGUGUGUUGGA-----UGAUGGAGU 5' has-let-7b :| ::||||:||| ||||||||| 5' GAGTGCACAGCCTATTGAACTACCTCA 3' ENST00000254231_P E:-27.6 S:113.000000 Loc:757 Cons: 95.24%(mmu) %(rno)
CLOCK	miR-141	2860 (107)	Yes	ENST00000309964	ENSG00000134852	ENSMUSG00000029238	ENSRNOG00000002175	CIRCADIAN LOCOMOTER OUTPUT CYCLES KAPUT PROTEIN (HCLOCK). [Source:SWISSPROT;Acc:O15516] ENSG00000134852 (-1) (56214202 56217124 56264494 56328539 55907305) 2922 (2922 nt) HUGO:2082:KIAA0334 [IPR001092:Basic helix-loop-helix dimerization domain bHLH; IPR001067:Nuclear translocator; IPR001610:PAC motif; IPR000014:PAS domain;]	1	-20.15	107	ENSMUSG00000029238 (mmu-miR-206)	ENSRNOG00000002175 (mmu-miR-206)	hsa-mir-206 hsa-mir-302	hsa-mir-206	0003700 transcription factor activity TAS; 0004871 signal transducer activity IEA; 0006357 regulation of transcription from Pol II promoter TAS; 0007165 signal transduction TAS; 0007623 circadian rhythm TAS; 0009648 response to photoperiod TAS; 0005634 nucleus IEA;	3' GGUGUGUGAAGGAAUGUAAG-GU 5' hsa-mir-206 __ ::|.:|||||::|.||||||.|| __ 5' UUAGGCACUUUUUAACAUUCUCA 3' ENST00000309964 E:-20.15 S:107.000000 Loc:1064 Cons: 91.30%(mmu) 91.30%(rno)
MAPK14	miR-24	735 (406)	Yes	ENST00000229794	ENSG00000112062	ENSMUSG00000053436	ENSRNOG00000000513	MITOGEN-ACTIVATED PROTEIN KINASE 14 (EC 2.7.1.37) (MITOGEN-ACTIVATED PROTEIN KINASE P38ALPHA) (MAP KINASE P38ALPHA) (CYTOKINE SUPPRESSIVE ANTI-INFLAMMATORY DRUG BINDING PROTEIN) (CSAID BINDING PROTEIN HUGO:6876:CSBP1 CSBP2 CSPB1 Mxi2 p38 PRKM14 PRKM15 [IPR000719:Protein kinase; IPR003527:MAP kinase;]	4	-96.72	406	ENSMUSG00000053436 (mmu-miR-132)	ENSRNOG00000000513 (rno-miR-351)	hsa-mir-132 hsa-mir-188 hsa-mir-195 rno-mir-351	hsa-mir-188 rno-mir-351 hsa-mir-195 hsa-mir-132	0004674 protein serine/threonine kinase activity IEA; 0004682 protein kinase CK2 activity IEA; 0004691 cAMP-dependent protein kinase activity IEA; 0004707 MAP kinase activity TAS; 0004708 MAP kinase kinase activity TAS; 0005524 ATP binding IEA; 0008339 MP kinase activity IDA; 0016740 transferase activity IEA; 0006468 protein amino acid phosphorylation IEA; 0006928 cell motility TAS; 0006935 chemo…	3' UGGGAGGUGGUACGUU-CCCUAC 5' hsa-mir-188 __ .:||||||:.:||.||.|||:|| __ 5' UUCCUCCAUGGUGGAAGGGGGUG 3' ENST00000229794 E:-32.419998 S:105.000000 Loc:181 Cons: 91.30%(mmu) %(rno)	3' GUCCGAGUUUCCCGAGGAGU-CCCU 5' rno-mir-351 __ .|||...:||||.||::|||.|||| __ 5' GAGG--GGAAGGCCUUUUCACGGGA 3' ENST00000229794 E:-24.879999 S:103.000000 Loc:118 Cons: %(mmu) 91.30%(rno)	3' CGGUUAUAAAGACACGACGAU 5' hsa-mir-195 __ .||.:.:|||||||.|||:|: __ 5' ACCUG-GUUUCUGUUCUGUUG 3' ENST00000229794 E:-20.75 S:100.000000 Loc:83 Cons: 90.00%(mmu) %(rno)	3' GCUGGUACCGACAUCUGACAAU 5' hsa-mir-132 __ :||.|.||||||||..|.|||| __ 5' UGAACUUGGCUGUAAUCAGUUA 3' ENST00000229794 E:-18.67 S:98.000000 Loc:2311 Cons: 90.91%(mmu) %(rno)
FLJ21308	miR-145	3326 (101)		ENST00000281631_P	ENSG00000151883	ENSMUSG00000021725	ENSRNOG00000010824	ENSG00000151883 (1) (49978815 49978815 50153787 50153787 50586973) 4001 (4001 nt) []	1	-18.21	101		ENSRNOG00000010824 (mmu-miR-98)	hsa-mir-98	hsa-mir-98		3' UUGUUAUGUUGAAUGAUGGAGU 5' hsa-mir-98 __ ..:|.||:|||..||||||||| __ 5' UUUAUUAUAAC--ACUACCUCA 3' ENST00000281631_P E:-18.209999 S:101.000000 Loc:3400 Cons: %(mmu) 90.00%(rno)
FLJ13158	miR-23a	1126 (303)		ENST00000330083	ENSG00000137343	ENSMUSG00000024426	ENSRNOG00000000809	ENSG00000137343 (1) (30700855 30701598 30719847 30720749 30721362) 810 (810 nt) HUGO:21186:Em:AB023049.7 FLJ13158 [IPR007965:Protein of unknown function DUF738;]	3	-77.84	303	ENSMUSG00000024426 (mmu-miR-125b)		hsa-mir-125b hsa-mir-150 mmu-mir-292_3p	hsa-mir-125b hsa-mir-150 mmu-mir-292_3p		3' AGUGUUCAAUCCCAGAGUCCCU 5' hsa-mir-125b __ |||||:|.|.||||||.:|||| __ 5' UCACAGGAU-GGGUCU-GGGGA 3' ENST00000330083 E:-29.030001 S:109.000000 Loc:484 Cons: 90.00%(mmu) %(rno)	3' GUGACCAUGUU-CCCAACCCUCU 5' hsa-mir-150 __ :.||||.|||:.||||.||||.| __ 5' UCCUGG-ACAGUGGGUGGGGACA 3' ENST00000330083 E:-24.639999 S:99.000000 Loc:555 Cons: 90.91%(mmu) %(rno)	3' UGUGAGUUUUGGACCGCCGUGAA 5' mmu-mir-292_3p __ .||:||:|||||||..||.||.| __ 5' UCAUUCGAAACCUGCAGGAACGU 3' ENST00000330083 E:-24.17 S:95.000000 Loc:591 Cons: 95.65%(mmu) %(rno)
CGI-38	miR-16	2923 (106)		ENST00000290942	ENSG00000159713	ENSMUSG00000014846	ENSRNOG00000016890	PROTEIN CGI-38. [Source:SWISSPROT;Acc:Q9BW30] ENSG00000159713 (-1) (67199951 67200314 67201251 67203626 67136902) 363 (363 nt) [IPR001472:Bipartite nuclear localization signal;]	1	-18.75	106	ENSMUSG00000014846 (mmu-miR-16)	ENSRNOG00000016890 (mmu-miR-16)	hsa-mir-16 rno-mir-352	rno-mir-352		3' AUGAUACGUUGGAUGAUGAGA 5' rno-mir-352 __ |..|||.:||.||:||:|||| __ 5' UCAUAUUUAAGCUGCUGCUCU 3' ENST00000290942 E:-18.75 S:106.000000 Loc:294 Cons: 100.00%(mmu) 100.00%(rno)
